# Supplementary material for: Prostate Cancer Secretome and Membrane Proteome from Pten Conditional Knockout Mice Identify Potential Biomarkers for Disease Progression
Source: Int J Mol Sci. 2022 Aug 17;23(16):9224. doi: 10.3390/ijms23169224 (PMC9409251; doi:10.3390/ijms23169224)
Supplement: Supplementary file 1 [file ijms-23-09224-s001.zip]

Archive with 7 entries (7 files):
- 1. Predicted-Membrane-Proteins_Pten_all_genes.xlsx
- 1. Selected_GO_by_EnrichR_Membrane_Proteins_Log10.xlsx
- 1. Selected_GO_by_STRING_Membrane_Proteins_Log10.xlsx
- 2. Predicted-Secreted-Proteins_Pten_All_genes.xlsx
- 2. Selected_GO_by_EnrichR_Secreted_Proteins_Log10.xlsx
- 2. Selected_GO_by_STRING_Secreted_Proteins_Log10.xlsx
- ijms-1847392-Supplementary Files.pdf
