# Supplementary material for: Prostate Cancer Secretome and Membrane Proteome from Pten Conditional Knockout Mice Identify Potential Biomarkers for Disease Progression
Source: Int J Mol Sci. 2022 Aug 17;23(16):9224. doi: 10.3390/ijms23169224 (PMC9409251; doi:10.3390/ijms23169224)
Supplement: Supplementary file 1 [file ijms-23-09224-s001.zip › 1. Predicted-Membrane-Proteins_Pten_all_genes.xlsx]

## Sheet: AP
Protein Class	PTEN - Up				PTEN - Down
Gene	PIN	MED	ADV		PIN	MED	ADV
A3GALT2	#N/A	#N/A	#N/A		A3galt2	A3galt2	A3galt2
A4GALT	#N/A	#N/A	#N/A		#N/A	A4galt	A4galt
AACS	#N/A	#N/A	#N/A		#N/A	#N/A	#N/A
AADACL3	#N/A	#N/A	#N/A		#N/A	#N/A	#N/A
AADACL4	#N/A	#N/A	#N/A		#N/A	#N/A	#N/A
AASDH	#N/A	#N/A	#N/A		#N/A	#N/A	#N/A
AATK	#N/A	#N/A	#N/A		#N/A	#N/A	#N/A
ABCA1	#N/A	#N/A	#N/A		#N/A	#N/A	#N/A
ABCA10	#N/A	#N/A	#N/A		#N/A	#N/A	#N/A
ABCA12	#N/A	#N/A	#N/A		#N/A	#N/A	#N/A
ABCA13	#N/A	#N/A	#N/A		#N/A	#N/A	#N/A
ABCA2	#N/A	#N/A	#N/A		#N/A	#N/A	#N/A
ABCA3	#N/A	#N/A	#N/A		#N/A	#N/A	#N/A
ABCA4	#N/A	#N/A	#N/A		#N/A	#N/A	#N/A
ABCA5	#N/A	#N/A	#N/A		Abca5	Abca5	Abca5
ABCA6	#N/A	#N/A	#N/A		Abca6	Abca6	#N/A
ABCA7	#N/A	#N/A	#N/A		#N/A	#N/A	#N/A
ABCA8	#N/A	#N/A	#N/A		#N/A	#N/A	#N/A
ABCA9	#N/A	#N/A	#N/A		#N/A	#N/A	#N/A
ABCB1	#N/A	#N/A	#N/A		#N/A	#N/A	#N/A
ABCB10	#N/A	#N/A	#N/A		#N/A	#N/A	#N/A
ABCB11	#N/A	#N/A	#N/A		#N/A	#N/A	#N/A
ABCB4	#N/A	#N/A	#N/A		#N/A	#N/A	#N/A
ABCB5	#N/A	#N/A	#N/A		#N/A	#N/A	#N/A
ABCB6	#N/A	#N/A	#N/A		Abcb6	#N/A	#N/A
ABCB7	#N/A	#N/A	#N/A		#N/A	#N/A	#N/A
ABCB8	#N/A	#N/A	#N/A		#N/A	#N/A	#N/A
ABCB9	#N/A	#N/A	#N/A		#N/A	#N/A	#N/A
ABCC1	#N/A	Abcc1	Abcc1		#N/A	#N/A	#N/A
ABCC10	#N/A	#N/A	#N/A		#N/A	#N/A	#N/A
ABCC11	#N/A	#N/A	#N/A		#N/A	#N/A	#N/A
ABCC12	#N/A	#N/A	#N/A		#N/A	#N/A	#N/A
ABCC2	#N/A	#N/A	#N/A		#N/A	#N/A	#N/A
ABCC3	#N/A	#N/A	#N/A		#N/A	#N/A	#N/A
ABCC4	#N/A	#N/A	#N/A		#N/A	#N/A	#N/A
ABCC5	Abcc5	Abcc5	Abcc5		#N/A	#N/A	#N/A
ABCC6	#N/A	#N/A	#N/A		#N/A	#N/A	#N/A
ABCC8	#N/A	#N/A	#N/A		#N/A	#N/A	#N/A
ABCC9	#N/A	#N/A	#N/A		#N/A	#N/A	#N/A
ABCD1	#N/A	#N/A	#N/A		#N/A	#N/A	#N/A
ABCD2	#N/A	#N/A	#N/A		#N/A	#N/A	#N/A
ABCD3	#N/A	Abcd3	#N/A		#N/A	#N/A	#N/A
ABCD4	#N/A	#N/A	#N/A		#N/A	#N/A	#N/A
ABCG1	Abcg1	Abcg1	Abcg1		#N/A	#N/A	#N/A
ABCG2	#N/A	#N/A	#N/A		#N/A	#N/A	#N/A
ABCG4	#N/A	#N/A	#N/A		#N/A	#N/A	#N/A
ABCG5	Abcg5	Abcg5	Abcg5		#N/A	#N/A	#N/A
ABCG8	Abcg8	Abcg8	Abcg8		#N/A	#N/A	#N/A
ABHD1	#N/A	#N/A	#N/A		#N/A	#N/A	#N/A
ABHD12	#N/A	#N/A	#N/A		#N/A	#N/A	Abhd12
ABHD13	#N/A	#N/A	#N/A		#N/A	#N/A	#N/A
ABHD14A	#N/A	#N/A	#N/A		Abhd14a	Abhd14a	#N/A
ABHD16A	#N/A	#N/A	#N/A		#N/A	#N/A	#N/A
ABHD2	#N/A	#N/A	#N/A		#N/A	#N/A	#N/A
ABHD3	#N/A	#N/A	#N/A		#N/A	#N/A	#N/A
ABHD6	#N/A	#N/A	#N/A		#N/A	#N/A	#N/A
ABO	Abo	Abo	Abo		#N/A	#N/A	#N/A
AC001226.2	#N/A	#N/A	#N/A		#N/A	#N/A	#N/A
AC004691.2	#N/A	#N/A	#N/A		#N/A	#N/A	#N/A
AC004754.1	#N/A	#N/A	#N/A		#N/A	#N/A	#N/A
AC004832.3	#N/A	#N/A	#N/A		#N/A	#N/A	#N/A
AC005551.1	#N/A	#N/A	#N/A		#N/A	#N/A	#N/A
AC006538.2	#N/A	#N/A	#N/A		#N/A	#N/A	#N/A
AC007040.2	#N/A	#N/A	#N/A		#N/A	#N/A	#N/A
AC008397.1	#N/A	#N/A	#N/A		#N/A	#N/A	#N/A
AC009163.4	#N/A	#N/A	#N/A		#N/A	#N/A	#N/A
AC009477.2	#N/A	#N/A	#N/A		#N/A	#N/A	#N/A
AC010319.2	#N/A	#N/A	#N/A		#N/A	#N/A	#N/A
AC010325.1	#N/A	#N/A	#N/A		#N/A	#N/A	#N/A
AC011448.1	#N/A	#N/A	#N/A		#N/A	#N/A	#N/A
AC011604.2	#N/A	#N/A	#N/A		#N/A	#N/A	#N/A
AC018709.1	#N/A	#N/A	#N/A		#N/A	#N/A	#N/A
AC018755.2	#N/A	#N/A	#N/A		#N/A	#N/A	#N/A
AC022167.5	#N/A	#N/A	#N/A		#N/A	#N/A	#N/A
AC024592.3	#N/A	#N/A	#N/A		#N/A	#N/A	#N/A
AC026316.5	#N/A	#N/A	#N/A		#N/A	#N/A	#N/A
AC068580.4	#N/A	#N/A	#N/A		#N/A	#N/A	#N/A
AC068775.1	#N/A	#N/A	#N/A		#N/A	#N/A	#N/A
AC068987.5	#N/A	#N/A	#N/A		#N/A	#N/A	#N/A
AC078864.2	#N/A	#N/A	#N/A		#N/A	#N/A	#N/A
AC087498.1	#N/A	#N/A	#N/A		#N/A	#N/A	#N/A
AC092143.1	#N/A	#N/A	#N/A		#N/A	#N/A	#N/A
AC092718.3	#N/A	#N/A	#N/A		#N/A	#N/A	#N/A
AC093525.2	#N/A	#N/A	#N/A		#N/A	#N/A	#N/A
AC097637.1	#N/A	#N/A	#N/A		#N/A	#N/A	#N/A
AC100868.1	#N/A	#N/A	#N/A		#N/A	#N/A	#N/A
AC116565.1	#N/A	#N/A	#N/A		#N/A	#N/A	#N/A
AC117457.1	#N/A	#N/A	#N/A		#N/A	#N/A	#N/A
AC118553.2	#N/A	#N/A	#N/A		#N/A	#N/A	#N/A
AC119396.1	#N/A	#N/A	#N/A		#N/A	#N/A	#N/A
AC126755.2	#N/A	#N/A	#N/A		#N/A	#N/A	#N/A
AC129492.3	#N/A	#N/A	#N/A		#N/A	#N/A	#N/A
AC131160.1	#N/A	#N/A	#N/A		#N/A	#N/A	#N/A
AC134669.1	#N/A	#N/A	#N/A		#N/A	#N/A	#N/A
AC134980.5	#N/A	#N/A	#N/A		#N/A	#N/A	#N/A
AC135068.1	#N/A	#N/A	#N/A		#N/A	#N/A	#N/A
AC135068.3	#N/A	#N/A	#N/A		#N/A	#N/A	#N/A
AC136616.1	#N/A	#N/A	#N/A		#N/A	#N/A	#N/A
AC138811.2	#N/A	#N/A	#N/A		#N/A	#N/A	#N/A
AC138894.1	#N/A	#N/A	#N/A		#N/A	#N/A	#N/A
AC138969.1	#N/A	#N/A	#N/A		#N/A	#N/A	#N/A
AC171558.1	#N/A	#N/A	#N/A		#N/A	#N/A	#N/A
AC171558.3	#N/A	#N/A	#N/A		#N/A	#N/A	#N/A
AC213203.1	#N/A	#N/A	#N/A		#N/A	#N/A	#N/A
ACBD4	#N/A	#N/A	#N/A		#N/A	#N/A	#N/A
ACBD5	#N/A	#N/A	#N/A		#N/A	#N/A	#N/A
ACE	#N/A	#N/A	#N/A		Ace	Ace	Ace
ACE2	#N/A	#N/A	#N/A		#N/A	#N/A	#N/A
ACER1	#N/A	#N/A	#N/A		#N/A	#N/A	#N/A
ACER2	#N/A	#N/A	#N/A		#N/A	#N/A	#N/A
ACER3	Acer3	Acer3	Acer3		#N/A	#N/A	#N/A
ACHE	#N/A	#N/A	Ache		#N/A	#N/A	#N/A
ACKR1	#N/A	#N/A	#N/A		#N/A	#N/A	#N/A
ACKR2	#N/A	#N/A	#N/A		#N/A	#N/A	#N/A
ACKR3	#N/A	#N/A	#N/A		#N/A	#N/A	#N/A
ACKR4	#N/A	#N/A	#N/A		#N/A	#N/A	#N/A
ACP2	#N/A	#N/A	#N/A		#N/A	#N/A	#N/A
ACP4	#N/A	#N/A	#N/A		#N/A	#N/A	#N/A
ACPP	#N/A	#N/A	#N/A		#N/A	#N/A	#N/A
ACSBG2	#N/A	#N/A	#N/A		#N/A	#N/A	#N/A
ACSF2	#N/A	#N/A	#N/A		#N/A	#N/A	#N/A
ACSF3	#N/A	#N/A	#N/A		#N/A	#N/A	#N/A
ACSL1	#N/A	#N/A	#N/A		#N/A	#N/A	#N/A
ACSL3	#N/A	#N/A	#N/A		Acsl3	Acsl3	Acsl3
ACSL4	#N/A	#N/A	#N/A		#N/A	#N/A	#N/A
ACSL5	#N/A	#N/A	#N/A		#N/A	#N/A	#N/A
ACSL6	#N/A	#N/A	#N/A		#N/A	#N/A	#N/A
ACSM1	Acsm1	Acsm1	Acsm1		#N/A	#N/A	#N/A
ACSM2A	#N/A	#N/A	#N/A		#N/A	#N/A	#N/A
ACSM2B	#N/A	#N/A	#N/A		#N/A	#N/A	#N/A
ACSM4	#N/A	#N/A	#N/A		#N/A	#N/A	#N/A
ACSM6	#N/A	#N/A	#N/A		#N/A	#N/A	#N/A
ACSS1	#N/A	#N/A	#N/A		#N/A	#N/A	#N/A
ACSS2	#N/A	#N/A	#N/A		#N/A	#N/A	#N/A
ACSS3	#N/A	#N/A	#N/A		#N/A	#N/A	#N/A
ACVR1	#N/A	#N/A	#N/A		#N/A	#N/A	#N/A
ACVR1B	#N/A	#N/A	#N/A		#N/A	#N/A	#N/A
ACVR1C	#N/A	#N/A	#N/A		Acvr1c	Acvr1c	Acvr1c
ACVR2A	#N/A	#N/A	#N/A		#N/A	#N/A	#N/A
ACVR2B	#N/A	#N/A	#N/A		Acvr2b	Acvr2b	Acvr2b
ACVRL1	#N/A	#N/A	#N/A		#N/A	#N/A	#N/A
ADAM10	#N/A	#N/A	#N/A		#N/A	#N/A	#N/A
ADAM11	#N/A	#N/A	#N/A		Adam11	Adam11	#N/A
ADAM12	#N/A	#N/A	#N/A		#N/A	#N/A	#N/A
ADAM15	#N/A	#N/A	#N/A		#N/A	#N/A	#N/A
ADAM17	#N/A	#N/A	#N/A		#N/A	#N/A	#N/A
ADAM18	#N/A	#N/A	#N/A		#N/A	#N/A	#N/A
ADAM19	#N/A	#N/A	#N/A		#N/A	#N/A	#N/A
ADAM2	#N/A	#N/A	#N/A		#N/A	#N/A	#N/A
ADAM20	#N/A	#N/A	#N/A		#N/A	#N/A	#N/A
ADAM21	#N/A	#N/A	#N/A		#N/A	#N/A	#N/A
ADAM22	#N/A	#N/A	#N/A		#N/A	#N/A	#N/A
ADAM23	#N/A	#N/A	#N/A		#N/A	#N/A	#N/A
ADAM28	Adam28	Adam28	Adam28		#N/A	#N/A	#N/A
ADAM29	#N/A	#N/A	#N/A		#N/A	#N/A	#N/A
ADAM30	#N/A	#N/A	#N/A		#N/A	#N/A	#N/A
ADAM32	#N/A	#N/A	#N/A		#N/A	#N/A	#N/A
ADAM33	#N/A	#N/A	#N/A		Adam33	Adam33	#N/A
ADAM7	#N/A	#N/A	#N/A		#N/A	#N/A	#N/A
ADAM8	#N/A	Adam8	Adam8		#N/A	#N/A	#N/A
ADAM9	#N/A	#N/A	#N/A		#N/A	#N/A	#N/A
ADAMTS1	#N/A	#N/A	#N/A		#N/A	#N/A	#N/A
ADAMTS4	#N/A	#N/A	#N/A		#N/A	#N/A	#N/A
ADCK2	#N/A	#N/A	#N/A		#N/A	#N/A	#N/A
ADCK5	#N/A	#N/A	#N/A		#N/A	#N/A	Adck5
ADCY1	#N/A	#N/A	#N/A		#N/A	Adcy1	#N/A
ADCY10	#N/A	#N/A	#N/A		#N/A	#N/A	#N/A
ADCY2	#N/A	#N/A	#N/A		#N/A	#N/A	#N/A
ADCY3	#N/A	#N/A	Adcy3		#N/A	#N/A	#N/A
ADCY4	#N/A	#N/A	#N/A		#N/A	#N/A	#N/A
ADCY5	#N/A	#N/A	#N/A		Adcy5	Adcy5	Adcy5
ADCY6	#N/A	#N/A	#N/A		#N/A	#N/A	#N/A
ADCY7	#N/A	#N/A	#N/A		#N/A	#N/A	#N/A
ADCY8	Adcy8	Adcy8	Adcy8		#N/A	#N/A	#N/A
ADCY9	#N/A	#N/A	#N/A		#N/A	#N/A	#N/A
ADCYAP1R1	#N/A	#N/A	#N/A		Adcyap1r1	#N/A	#N/A
ADGRA1	#N/A	#N/A	#N/A		#N/A	#N/A	#N/A
ADGRA2	#N/A	#N/A	#N/A		#N/A	#N/A	#N/A
ADGRA3	#N/A	#N/A	#N/A		#N/A	#N/A	#N/A
ADGRB1	#N/A	#N/A	#N/A		#N/A	#N/A	#N/A
ADGRB2	#N/A	#N/A	#N/A		#N/A	#N/A	#N/A
ADGRB3	#N/A	#N/A	#N/A		#N/A	#N/A	#N/A
ADGRD1	#N/A	#N/A	#N/A		#N/A	#N/A	#N/A
ADGRD2	#N/A	#N/A	#N/A		#N/A	#N/A	#N/A
ADGRE1	#N/A	#N/A	#N/A		#N/A	#N/A	#N/A
ADGRE2	#N/A	#N/A	#N/A		#N/A	#N/A	#N/A
ADGRE3	#N/A	#N/A	#N/A		#N/A	#N/A	#N/A
ADGRE5	#N/A	#N/A	#N/A		#N/A	#N/A	#N/A
ADGRF1	#N/A	#N/A	#N/A		#N/A	#N/A	#N/A
ADGRF2	#N/A	#N/A	#N/A		#N/A	#N/A	#N/A
ADGRF3	#N/A	#N/A	#N/A		#N/A	#N/A	#N/A
ADGRF4	#N/A	#N/A	#N/A		#N/A	#N/A	#N/A
ADGRF5	#N/A	#N/A	#N/A		#N/A	#N/A	#N/A
ADGRG1	#N/A	#N/A	#N/A		#N/A	#N/A	#N/A
ADGRG2	#N/A	#N/A	#N/A		#N/A	#N/A	#N/A
ADGRG3	#N/A	#N/A	#N/A		#N/A	#N/A	#N/A
ADGRG4	#N/A	#N/A	#N/A		#N/A	#N/A	#N/A
ADGRG5	#N/A	#N/A	#N/A		#N/A	#N/A	#N/A
ADGRG6	#N/A	#N/A	#N/A		#N/A	#N/A	#N/A
ADGRG7	#N/A	#N/A	#N/A		#N/A	#N/A	#N/A
ADGRL1	#N/A	#N/A	#N/A		#N/A	#N/A	#N/A
ADGRL2	#N/A	#N/A	#N/A		#N/A	#N/A	#N/A
ADGRL3	#N/A	#N/A	#N/A		#N/A	#N/A	#N/A
ADGRL4	#N/A	#N/A	#N/A		#N/A	#N/A	#N/A
ADGRV1	#N/A	#N/A	#N/A		#N/A	#N/A	#N/A
ADIG	#N/A	#N/A	#N/A		#N/A	#N/A	#N/A
ADIPOR1	#N/A	#N/A	#N/A		#N/A	#N/A	#N/A
ADIPOR2	#N/A	#N/A	#N/A		Adipor2	Adipor2	Adipor2
ADORA1	#N/A	#N/A	#N/A		#N/A	#N/A	#N/A
ADORA2A	#N/A	#N/A	#N/A		#N/A	#N/A	#N/A
ADORA2B	Adora2b	Adora2b	Adora2b		#N/A	#N/A	#N/A
ADORA3	#N/A	#N/A	#N/A		#N/A	#N/A	#N/A
ADPRM	#N/A	#N/A	#N/A		#N/A	#N/A	#N/A
ADRA1A	#N/A	#N/A	#N/A		#N/A	#N/A	Adra1a
ADRA1B	#N/A	#N/A	#N/A		#N/A	#N/A	#N/A
ADRA1D	#N/A	#N/A	#N/A		#N/A	#N/A	#N/A
ADRA2A	#N/A	#N/A	#N/A		#N/A	#N/A	#N/A
ADRA2B	#N/A	#N/A	#N/A		#N/A	#N/A	#N/A
ADRA2C	#N/A	#N/A	#N/A		#N/A	#N/A	#N/A
ADRB1	Adrb1	Adrb1	Adrb1		#N/A	#N/A	#N/A
ADRB2	#N/A	#N/A	#N/A		#N/A	Adrb2	Adrb2
ADRB3	#N/A	#N/A	#N/A		#N/A	#N/A	#N/A
ADTRP	#N/A	#N/A	#N/A		#N/A	#N/A	#N/A
AF241726.2	#N/A	#N/A	#N/A		#N/A	#N/A	#N/A
AFG3L2	#N/A	#N/A	#N/A		#N/A	#N/A	#N/A
AGER	#N/A	#N/A	#N/A		#N/A	#N/A	#N/A
AGL	#N/A	#N/A	#N/A		#N/A	#N/A	#N/A
AGMO	#N/A	#N/A	#N/A		#N/A	#N/A	#N/A
AGPAT1	#N/A	#N/A	#N/A		#N/A	#N/A	#N/A
AGPAT2	#N/A	Agpat2	#N/A		#N/A	#N/A	#N/A
AGPAT3	#N/A	#N/A	#N/A		#N/A	#N/A	#N/A
AGPAT4	#N/A	#N/A	#N/A		#N/A	#N/A	#N/A
AGPAT5	#N/A	#N/A	#N/A		#N/A	#N/A	#N/A
AGRN	Agrn	Agrn	Agrn		#N/A	#N/A	#N/A
AGTR1	#N/A	#N/A	#N/A		#N/A	#N/A	#N/A
AGTR2	#N/A	#N/A	#N/A		#N/A	#N/A	#N/A
AGTRAP	#N/A	#N/A	#N/A		#N/A	#N/A	#N/A
AIFM1	#N/A	#N/A	#N/A		#N/A	#N/A	#N/A
AIG1	#N/A	#N/A	#N/A		#N/A	#N/A	#N/A
AJAP1	#N/A	#N/A	#N/A		#N/A	#N/A	#N/A
AKAP1	#N/A	#N/A	#N/A		#N/A	#N/A	#N/A
AKAP6	#N/A	#N/A	#N/A		#N/A	#N/A	#N/A
AKAP9	#N/A	#N/A	#N/A		#N/A	#N/A	#N/A
AL034430.1	#N/A	#N/A	#N/A		#N/A	#N/A	#N/A
AL035460.1	#N/A	#N/A	#N/A		#N/A	#N/A	#N/A
AL121845.3	#N/A	#N/A	#N/A		#N/A	#N/A	#N/A
AL121900.2	#N/A	#N/A	#N/A		#N/A	#N/A	#N/A
AL136295.1	#N/A	#N/A	#N/A		#N/A	#N/A	#N/A
AL136295.3	#N/A	#N/A	#N/A		#N/A	#N/A	#N/A
AL136373.1	#N/A	#N/A	#N/A		#N/A	#N/A	#N/A
AL391650.1	#N/A	#N/A	#N/A		#N/A	#N/A	#N/A
AL590132.1	#N/A	#N/A	#N/A		#N/A	#N/A	#N/A
AL592490.1	#N/A	#N/A	#N/A		#N/A	#N/A	#N/A
AL662820.1	#N/A	#N/A	#N/A		#N/A	#N/A	#N/A
AL669918.1	#N/A	#N/A	#N/A		#N/A	#N/A	#N/A
AL691442.1	#N/A	#N/A	#N/A		#N/A	#N/A	#N/A
AL845331.2	#N/A	#N/A	#N/A		#N/A	#N/A	#N/A
ALCAM	#N/A	#N/A	#N/A		#N/A	#N/A	#N/A
ALDH16A1	#N/A	#N/A	#N/A		#N/A	#N/A	#N/A
ALDH3A2	#N/A	#N/A	#N/A		#N/A	#N/A	#N/A
ALDH3B2	Aldh3b2	Aldh3b2	Aldh3b2		#N/A	#N/A	#N/A
ALDH6A1	#N/A	#N/A	#N/A		#N/A	Aldh6a1	Aldh6a1
ALDOA	#N/A	#N/A	#N/A		#N/A	#N/A	#N/A
ALG1	#N/A	#N/A	#N/A		#N/A	#N/A	#N/A
ALG10	#N/A	#N/A	#N/A		#N/A	#N/A	#N/A
ALG10B	#N/A	#N/A	#N/A		#N/A	#N/A	#N/A
ALG11	#N/A	#N/A	#N/A		#N/A	#N/A	#N/A
ALG12	#N/A	#N/A	#N/A		#N/A	#N/A	#N/A
ALG14	#N/A	#N/A	#N/A		#N/A	#N/A	#N/A
ALG2	#N/A	#N/A	#N/A		#N/A	#N/A	#N/A
ALG3	#N/A	#N/A	#N/A		#N/A	#N/A	#N/A
ALG5	#N/A	#N/A	#N/A		#N/A	#N/A	#N/A
ALG6	#N/A	#N/A	#N/A		#N/A	#N/A	#N/A
ALG8	#N/A	#N/A	#N/A		#N/A	#N/A	#N/A
ALG9	#N/A	#N/A	#N/A		#N/A	#N/A	#N/A
ALK	#N/A	#N/A	#N/A		#N/A	#N/A	#N/A
ALOX5AP	#N/A	#N/A	#N/A		#N/A	#N/A	#N/A
ALPK1	Alpk1	Alpk1	Alpk1		#N/A	#N/A	#N/A
ALPL	#N/A	#N/A	#N/A		#N/A	#N/A	#N/A
AMFR	#N/A	#N/A	#N/A		#N/A	#N/A	#N/A
AMHR2	#N/A	#N/A	#N/A		#N/A	Amhr2	#N/A
AMIGO1	#N/A	#N/A	#N/A		#N/A	#N/A	Amigo1
AMIGO2	#N/A	#N/A	#N/A		#N/A	#N/A	#N/A
AMIGO3	#N/A	#N/A	#N/A		#N/A	#N/A	#N/A
AMN	#N/A	#N/A	Amn		#N/A	#N/A	#N/A
ANAPC1	#N/A	#N/A	#N/A		#N/A	#N/A	#N/A
ANKH	#N/A	#N/A	#N/A		#N/A	#N/A	#N/A
ANKLE1	Ankle1	Ankle1	Ankle1		#N/A	#N/A	#N/A
ANKLE2	#N/A	#N/A	#N/A		#N/A	#N/A	#N/A
ANKRD29	#N/A	#N/A	#N/A		#N/A	#N/A	#N/A
ANKRD46	#N/A	#N/A	#N/A		#N/A	#N/A	#N/A
ANO1	Ano1	Ano1	Ano1		#N/A	#N/A	#N/A
ANO10	#N/A	#N/A	#N/A		#N/A	#N/A	#N/A
ANO2	#N/A	#N/A	#N/A		#N/A	#N/A	#N/A
ANO3	#N/A	#N/A	#N/A		#N/A	#N/A	#N/A
ANO4	#N/A	#N/A	#N/A		#N/A	#N/A	#N/A
ANO5	#N/A	#N/A	#N/A		#N/A	#N/A	#N/A
ANO6	#N/A	Ano6	Ano6		#N/A	#N/A	#N/A
ANO7	#N/A	#N/A	#N/A		#N/A	#N/A	#N/A
ANO8	#N/A	#N/A	#N/A		#N/A	#N/A	#N/A
ANO9	Ano9	Ano9	Ano9		#N/A	#N/A	#N/A
ANPEP	Anpep	Anpep	Anpep		#N/A	#N/A	#N/A
ANTXR1	#N/A	#N/A	#N/A		#N/A	#N/A	#N/A
ANTXR2	#N/A	#N/A	#N/A		#N/A	#N/A	#N/A
ANTXRL	#N/A	#N/A	#N/A		#N/A	#N/A	#N/A
AP000350.4	#N/A	#N/A	#N/A		#N/A	#N/A	#N/A
AP000781.2	#N/A	#N/A	#N/A		#N/A	#N/A	#N/A
AP001781.2	#N/A	#N/A	#N/A		#N/A	#N/A	#N/A
AP002512.3	#N/A	#N/A	#N/A		#N/A	#N/A	#N/A
AP003071.5	#N/A	#N/A	#N/A		#N/A	#N/A	#N/A
AP006437.1	#N/A	#N/A	#N/A		#N/A	#N/A	#N/A
AP5S1	#N/A	#N/A	#N/A		#N/A	#N/A	#N/A
APCDD1	#N/A	#N/A	#N/A		Apcdd1	Apcdd1	Apcdd1
APCDD1L	#N/A	#N/A	#N/A		#N/A	#N/A	#N/A
APH1A	#N/A	#N/A	#N/A		#N/A	#N/A	#N/A
APH1B	#N/A	#N/A	#N/A		#N/A	#N/A	#N/A
APLF	#N/A	#N/A	#N/A		#N/A	#N/A	#N/A
APLNR	#N/A	#N/A	#N/A		#N/A	#N/A	#N/A
APLP1	Aplp1	Aplp1	Aplp1		#N/A	#N/A	#N/A
APLP2	#N/A	#N/A	#N/A		#N/A	#N/A	#N/A
APMAP	#N/A	#N/A	#N/A		#N/A	#N/A	#N/A
APOC4-APOC2	#N/A	#N/A	#N/A		#N/A	#N/A	#N/A
APOL1	#N/A	#N/A	#N/A		#N/A	#N/A	#N/A
APOL2	#N/A	#N/A	#N/A		#N/A	#N/A	#N/A
APOL4	#N/A	#N/A	#N/A		#N/A	#N/A	#N/A
APOL6	#N/A	#N/A	#N/A		#N/A	#N/A	#N/A
APOLD1	#N/A	#N/A	#N/A		#N/A	#N/A	#N/A
APOO	#N/A	#N/A	#N/A		#N/A	#N/A	#N/A
APP	#N/A	#N/A	#N/A		#N/A	#N/A	#N/A
AQP1	#N/A	#N/A	#N/A		#N/A	#N/A	#N/A
AQP10	#N/A	#N/A	#N/A		#N/A	#N/A	#N/A
AQP11	#N/A	#N/A	#N/A		#N/A	#N/A	#N/A
AQP12A	#N/A	#N/A	#N/A		#N/A	#N/A	#N/A
AQP12B	#N/A	#N/A	#N/A		#N/A	#N/A	#N/A
AQP2	#N/A	#N/A	#N/A		#N/A	#N/A	#N/A
AQP3	#N/A	#N/A	#N/A		#N/A	#N/A	#N/A
AQP4	Aqp4	Aqp4	Aqp4		#N/A	#N/A	#N/A
AQP5	Aqp5	Aqp5	Aqp5		#N/A	#N/A	#N/A
AQP6	#N/A	#N/A	#N/A		#N/A	#N/A	#N/A
AQP7	#N/A	#N/A	#N/A		#N/A	#N/A	#N/A
AQP8	#N/A	#N/A	#N/A		#N/A	#N/A	#N/A
AQP9	#N/A	#N/A	#N/A		#N/A	#N/A	#N/A
AQR	#N/A	#N/A	#N/A		#N/A	#N/A	#N/A
AREG	#N/A	Areg	Areg		#N/A	#N/A	#N/A
AREL1	#N/A	#N/A	#N/A		#N/A	#N/A	#N/A
ARHGAP1	#N/A	#N/A	#N/A		#N/A	#N/A	#N/A
ARHGAP26	#N/A	#N/A	#N/A		#N/A	#N/A	#N/A
ARHGAP42	#N/A	#N/A	#N/A		#N/A	#N/A	#N/A
ARIH2OS	#N/A	#N/A	#N/A		#N/A	#N/A	#N/A
ARL10	#N/A	#N/A	#N/A		#N/A	#N/A	#N/A
ARL6IP1	#N/A	#N/A	#N/A		#N/A	#N/A	#N/A
ARL6IP5	#N/A	#N/A	#N/A		#N/A	#N/A	#N/A
ARL6IP6	#N/A	#N/A	#N/A		#N/A	#N/A	#N/A
ARMC10	#N/A	#N/A	#N/A		#N/A	#N/A	#N/A
ARMCX1	#N/A	#N/A	#N/A		#N/A	#N/A	#N/A
ARMCX2	#N/A	#N/A	#N/A		Armcx2	Armcx2	Armcx2
ARMCX3	#N/A	#N/A	#N/A		#N/A	#N/A	#N/A
ARMCX6	#N/A	#N/A	#N/A		#N/A	Armcx6	Armcx6
ARSD	#N/A	#N/A	#N/A		#N/A	#N/A	#N/A
ARSE	#N/A	#N/A	#N/A		#N/A	#N/A	#N/A
ARSF	#N/A	#N/A	#N/A		#N/A	#N/A	#N/A
ARSH	#N/A	#N/A	#N/A		#N/A	#N/A	#N/A
ART1	#N/A	#N/A	#N/A		#N/A	#N/A	#N/A
ART3	#N/A	#N/A	#N/A		Art3	Art3	Art3
ART4	#N/A	#N/A	#N/A		#N/A	#N/A	#N/A
ARV1	#N/A	#N/A	#N/A		#N/A	#N/A	#N/A
ASB11	Asb11	Asb11	Asb11		#N/A	#N/A	#N/A
ASB18	#N/A	#N/A	#N/A		#N/A	#N/A	#N/A
ASB5	#N/A	#N/A	#N/A		#N/A	#N/A	#N/A
ASGR2	#N/A	#N/A	#N/A		#N/A	#N/A	#N/A
ASIC1	#N/A	#N/A	#N/A		#N/A	#N/A	#N/A
ASIC2	#N/A	#N/A	#N/A		#N/A	Asic2	#N/A
ASIC3	#N/A	#N/A	#N/A		#N/A	#N/A	#N/A
ASIC4	#N/A	#N/A	#N/A		Asic4	#N/A	Asic4
ASIC5	#N/A	#N/A	#N/A		#N/A	#N/A	#N/A
ASPH	#N/A	#N/A	#N/A		#N/A	#N/A	#N/A
ASPHD1	#N/A	#N/A	#N/A		#N/A	#N/A	#N/A
ASPHD2	#N/A	#N/A	#N/A		#N/A	#N/A	#N/A
ASPRV1	#N/A	#N/A	#N/A		#N/A	#N/A	#N/A
ASTN1	#N/A	#N/A	#N/A		#N/A	#N/A	#N/A
ASTN2	#N/A	#N/A	#N/A		#N/A	#N/A	#N/A
ASZ1	#N/A	#N/A	#N/A		#N/A	#N/A	#N/A
ATAD1	#N/A	#N/A	#N/A		#N/A	#N/A	#N/A
ATF6	#N/A	#N/A	#N/A		Atf6	Atf6	Atf6
ATF6B	#N/A	#N/A	#N/A		#N/A	#N/A	#N/A
ATF7	#N/A	#N/A	#N/A		#N/A	#N/A	#N/A
ATG9A	#N/A	#N/A	#N/A		#N/A	#N/A	#N/A
ATG9B	#N/A	Atg9b	Atg9b		#N/A	#N/A	#N/A
ATL1	#N/A	#N/A	#N/A		#N/A	#N/A	#N/A
ATL2	#N/A	#N/A	#N/A		#N/A	#N/A	#N/A
ATL3	#N/A	#N/A	#N/A		#N/A	#N/A	#N/A
ATM	#N/A	#N/A	#N/A		#N/A	#N/A	#N/A
ATP10A	#N/A	#N/A	#N/A		#N/A	#N/A	#N/A
ATP10B	Atp10b	Atp10b	Atp10b		#N/A	#N/A	#N/A
ATP10D	#N/A	#N/A	#N/A		#N/A	#N/A	#N/A
ATP11A	#N/A	#N/A	#N/A		#N/A	#N/A	#N/A
ATP11B	#N/A	#N/A	#N/A		#N/A	#N/A	#N/A
ATP11C	#N/A	#N/A	#N/A		#N/A	#N/A	#N/A
ATP12A	#N/A	#N/A	#N/A		Atp12a	Atp12a	Atp12a
ATP13A1	#N/A	#N/A	#N/A		#N/A	#N/A	#N/A
ATP13A2	#N/A	#N/A	#N/A		#N/A	#N/A	#N/A
ATP13A3	#N/A	#N/A	#N/A		#N/A	#N/A	#N/A
ATP13A4	#N/A	#N/A	#N/A		#N/A	#N/A	#N/A
ATP13A5	#N/A	#N/A	#N/A		#N/A	#N/A	#N/A
ATP1A1	Atp1a1	Atp1a1	Atp1a1		#N/A	#N/A	#N/A
ATP1A2	#N/A	#N/A	#N/A		Atp1a2	#N/A	#N/A
ATP1A3	#N/A	#N/A	#N/A		#N/A	#N/A	#N/A
ATP1A4	#N/A	#N/A	#N/A		#N/A	#N/A	#N/A
ATP1B1	#N/A	#N/A	#N/A		#N/A	#N/A	#N/A
ATP1B2	#N/A	#N/A	#N/A		#N/A	#N/A	#N/A
ATP1B3	#N/A	#N/A	#N/A		#N/A	#N/A	#N/A
ATP1B4	#N/A	#N/A	#N/A		#N/A	#N/A	#N/A
ATP2A1	#N/A	#N/A	#N/A		#N/A	#N/A	#N/A
ATP2A2	#N/A	#N/A	#N/A		#N/A	#N/A	#N/A
ATP2A3	Atp2a3	Atp2a3	Atp2a3		#N/A	#N/A	#N/A
ATP2B1	#N/A	#N/A	#N/A		#N/A	#N/A	#N/A
ATP2B2	#N/A	#N/A	#N/A		#N/A	#N/A	#N/A
ATP2B3	#N/A	#N/A	#N/A		#N/A	Atp2b3	Atp2b3
ATP2B4	#N/A	#N/A	#N/A		Atp2b4	Atp2b4	#N/A
ATP2C1	#N/A	#N/A	#N/A		#N/A	#N/A	#N/A
ATP2C2	Atp2c2	Atp2c2	Atp2c2		#N/A	#N/A	#N/A
ATP4A	Atp4a	Atp4a	Atp4a		#N/A	#N/A	#N/A
ATP4B	#N/A	#N/A	#N/A		#N/A	#N/A	#N/A
ATP5MC1	#N/A	#N/A	#N/A		#N/A	#N/A	#N/A
ATP5MC2	#N/A	#N/A	#N/A		#N/A	#N/A	#N/A
ATP5MC3	#N/A	#N/A	#N/A		#N/A	#N/A	#N/A
ATP5MD	#N/A	#N/A	#N/A		#N/A	#N/A	#N/A
ATP5MF	#N/A	#N/A	#N/A		#N/A	#N/A	#N/A
ATP5MG	#N/A	#N/A	#N/A		#N/A	#N/A	#N/A
ATP5MPL	#N/A	#N/A	#N/A		#N/A	#N/A	#N/A
ATP5PB	#N/A	#N/A	#N/A		#N/A	#N/A	#N/A
ATP6AP1	#N/A	#N/A	#N/A		#N/A	#N/A	#N/A
ATP6AP1L	#N/A	#N/A	#N/A		#N/A	#N/A	#N/A
ATP6AP2	Atp6ap2	#N/A	#N/A		#N/A	#N/A	#N/A
ATP6V0A1	#N/A	#N/A	#N/A		#N/A	#N/A	#N/A
ATP6V0A2	#N/A	#N/A	#N/A		#N/A	#N/A	#N/A
ATP6V0A4	Atp6v0a4	Atp6v0a4	Atp6v0a4		#N/A	#N/A	#N/A
ATP6V0B	#N/A	#N/A	#N/A		#N/A	#N/A	#N/A
ATP6V0C	#N/A	#N/A	#N/A		#N/A	#N/A	#N/A
ATP6V0E1	#N/A	#N/A	#N/A		#N/A	#N/A	#N/A
ATP6V0E2	#N/A	#N/A	#N/A		#N/A	#N/A	#N/A
ATP7A	#N/A	#N/A	#N/A		#N/A	#N/A	#N/A
ATP7B	#N/A	#N/A	#N/A		#N/A	#N/A	#N/A
ATP8A1	#N/A	#N/A	#N/A		Atp8a1	#N/A	#N/A
ATP8A2	#N/A	#N/A	Atp8a2		#N/A	#N/A	#N/A
ATP8B1	#N/A	#N/A	#N/A		#N/A	#N/A	#N/A
ATP8B2	#N/A	#N/A	#N/A		#N/A	#N/A	#N/A
ATP8B3	#N/A	#N/A	#N/A		#N/A	#N/A	#N/A
ATP8B4	#N/A	#N/A	#N/A		#N/A	#N/A	#N/A
ATP9A	#N/A	#N/A	#N/A		#N/A	#N/A	#N/A
ATP9B	#N/A	#N/A	#N/A		#N/A	#N/A	#N/A
ATR	#N/A	#N/A	#N/A		#N/A	#N/A	#N/A
ATRAID	#N/A	#N/A	#N/A		#N/A	#N/A	#N/A
ATRN	Atrn	Atrn	Atrn		#N/A	#N/A	#N/A
ATRNL1	#N/A	#N/A	#N/A		#N/A	#N/A	#N/A
ATXN3	#N/A	#N/A	#N/A		#N/A	#N/A	#N/A
AUP1	#N/A	#N/A	#N/A		#N/A	#N/A	#N/A
AVL9	#N/A	#N/A	#N/A		#N/A	#N/A	#N/A
AVPR1A	#N/A	#N/A	#N/A		#N/A	#N/A	#N/A
AVPR1B	#N/A	#N/A	#N/A		#N/A	#N/A	#N/A
AVPR2	#N/A	#N/A	#N/A		#N/A	#N/A	#N/A
AWAT1	#N/A	#N/A	#N/A		#N/A	#N/A	#N/A
AWAT2	#N/A	#N/A	#N/A		#N/A	#N/A	#N/A
AXL	#N/A	#N/A	#N/A		#N/A	#N/A	#N/A
B3GALT2	B3galt2	B3galt2	B3galt2		#N/A	#N/A	#N/A
B3GAT2	#N/A	#N/A	#N/A		#N/A	#N/A	#N/A
B3GNT10	#N/A	#N/A	#N/A		#N/A	#N/A	#N/A
B3GNT2	#N/A	#N/A	#N/A		B3gnt2	B3gnt2	#N/A
B4GALNT2	B4galnt2	B4galnt2	B4galnt2		#N/A	#N/A	#N/A
B4GALT1	#N/A	#N/A	#N/A		#N/A	#N/A	#N/A
B4GALT2	#N/A	#N/A	#N/A		#N/A	#N/A	#N/A
BACE1	#N/A	#N/A	#N/A		#N/A	#N/A	#N/A
BACE2	Bace2	Bace2	Bace2		#N/A	#N/A	#N/A
BAK1	#N/A	Bak1	Bak1		#N/A	#N/A	#N/A
BAMBI	#N/A	#N/A	#N/A		#N/A	#N/A	#N/A
BCAM	#N/A	#N/A	Bcam		#N/A	#N/A	#N/A
BCAP29	#N/A	#N/A	#N/A		#N/A	#N/A	#N/A
BCAP31	#N/A	#N/A	#N/A		#N/A	#N/A	#N/A
BCL2	#N/A	#N/A	#N/A		#N/A	#N/A	#N/A
BCL2L1	#N/A	#N/A	#N/A		#N/A	#N/A	#N/A
BCL2L10	#N/A	#N/A	#N/A		#N/A	#N/A	#N/A
BCL2L13	#N/A	#N/A	#N/A		#N/A	#N/A	#N/A
BCL2L2	#N/A	#N/A	#N/A		#N/A	#N/A	#N/A
BCS1L	#N/A	#N/A	#N/A		#N/A	#N/A	#N/A
BDKRB1	#N/A	#N/A	#N/A		#N/A	#N/A	#N/A
BDKRB2	#N/A	#N/A	#N/A		#N/A	#N/A	#N/A
BDNF	#N/A	#N/A	#N/A		#N/A	#N/A	#N/A
BEAN1	#N/A	#N/A	#N/A		#N/A	#N/A	#N/A
BEST1	#N/A	#N/A	#N/A		#N/A	#N/A	#N/A
BEST2	Best2	Best2	Best2		#N/A	#N/A	#N/A
BEST3	#N/A	#N/A	#N/A		#N/A	#N/A	#N/A
BEST4	#N/A	#N/A	#N/A		#N/A	#N/A	#N/A
BET1	#N/A	#N/A	#N/A		#N/A	#N/A	#N/A
BET1L	#N/A	#N/A	#N/A		#N/A	#N/A	#N/A
BFAR	#N/A	#N/A	#N/A		#N/A	#N/A	#N/A
BIK	Bik	#N/A	#N/A		#N/A	#N/A	#N/A
BMPR1A	#N/A	#N/A	#N/A		#N/A	#N/A	#N/A
BMPR1B	#N/A	#N/A	#N/A		#N/A	Bmpr1b	Bmpr1b
BMPR2	#N/A	#N/A	#N/A		#N/A	#N/A	#N/A
BMT2	#N/A	#N/A	#N/A		#N/A	#N/A	#N/A
BNIP1	#N/A	#N/A	#N/A		#N/A	#N/A	#N/A
BNIP2	#N/A	#N/A	#N/A		#N/A	#N/A	#N/A
BNIP3	Bnip3	Bnip3	#N/A		#N/A	#N/A	#N/A
BNIP3L	#N/A	#N/A	#N/A		#N/A	#N/A	#N/A
BNIPL	Bnipl	Bnipl	#N/A		#N/A	#N/A	#N/A
BOC	#N/A	#N/A	#N/A		#N/A	#N/A	#N/A
BOK	#N/A	#N/A	Bok		#N/A	#N/A	#N/A
BRI3	Bri3	#N/A	#N/A		#N/A	#N/A	#N/A
BRI3BP	#N/A	#N/A	#N/A		#N/A	#N/A	#N/A
BRICD5	#N/A	#N/A	#N/A		#N/A	#N/A	#N/A
BRS3	#N/A	#N/A	#N/A		#N/A	#N/A	#N/A
BRSK1	#N/A	#N/A	#N/A		Brsk1	Brsk1	#N/A
BRSK2	#N/A	#N/A	#N/A		#N/A	#N/A	#N/A
BSCL2	#N/A	#N/A	#N/A		#N/A	#N/A	#N/A
BSG	Bsg	Bsg	Bsg		#N/A	#N/A	#N/A
BSND	Bsnd	#N/A	#N/A		#N/A	#N/A	#N/A
BST2	#N/A	#N/A	#N/A		#N/A	#N/A	#N/A
BTC	Btc	Btc	Btc		#N/A	#N/A	#N/A
BTLA	#N/A	#N/A	#N/A		#N/A	#N/A	#N/A
BTN1A1	#N/A	#N/A	#N/A		#N/A	#N/A	#N/A
BTN2A1	#N/A	#N/A	#N/A		#N/A	#N/A	#N/A
BTN2A2	#N/A	#N/A	#N/A		#N/A	#N/A	#N/A
BTN3A1	#N/A	#N/A	#N/A		#N/A	#N/A	#N/A
BTN3A2	#N/A	#N/A	#N/A		#N/A	#N/A	#N/A
BTN3A3	#N/A	#N/A	#N/A		#N/A	#N/A	#N/A
BTNL2	#N/A	#N/A	#N/A		#N/A	#N/A	#N/A
BTNL3	#N/A	#N/A	#N/A		#N/A	#N/A	#N/A
BTNL8	#N/A	#N/A	#N/A		#N/A	#N/A	#N/A
BTNL9	#N/A	#N/A	#N/A		#N/A	#N/A	#N/A
BVES	#N/A	#N/A	#N/A		Bves	Bves	#N/A
BX255925.3	#N/A	#N/A	#N/A		#N/A	#N/A	#N/A
C10orf128	#N/A	#N/A	#N/A		#N/A	#N/A	#N/A
C11orf24	#N/A	#N/A	#N/A		#N/A	#N/A	#N/A
C11orf87	#N/A	#N/A	#N/A		#N/A	#N/A	#N/A
C12orf76	#N/A	#N/A	#N/A		#N/A	#N/A	#N/A
C14orf132	#N/A	#N/A	#N/A		#N/A	#N/A	#N/A
C14orf180	#N/A	#N/A	#N/A		#N/A	#N/A	#N/A
C14orf37	#N/A	#N/A	#N/A		#N/A	#N/A	#N/A
C16orf54	#N/A	#N/A	#N/A		#N/A	#N/A	#N/A
C16orf58	#N/A	#N/A	#N/A		#N/A	#N/A	#N/A
C16orf91	#N/A	#N/A	#N/A		#N/A	#N/A	#N/A
C16orf92	#N/A	#N/A	#N/A		#N/A	#N/A	#N/A
C17orf113	#N/A	#N/A	#N/A		#N/A	#N/A	#N/A
C17orf62	#N/A	#N/A	#N/A		#N/A	#N/A	#N/A
C17orf78	#N/A	#N/A	#N/A		#N/A	#N/A	#N/A
C17orf80	#N/A	#N/A	#N/A		#N/A	#N/A	#N/A
C18orf32	#N/A	#N/A	#N/A		#N/A	#N/A	#N/A
C19orf18	#N/A	#N/A	#N/A		#N/A	#N/A	#N/A
C19orf24	#N/A	#N/A	#N/A		#N/A	#N/A	#N/A
C19orf38	#N/A	#N/A	#N/A		#N/A	#N/A	#N/A
C1GALT1C1	#N/A	#N/A	#N/A		#N/A	#N/A	#N/A
C1GALT1C1L	#N/A	#N/A	#N/A		#N/A	#N/A	#N/A
C1orf159	#N/A	#N/A	#N/A		#N/A	#N/A	#N/A
C1orf162	#N/A	#N/A	#N/A		#N/A	#N/A	#N/A
C1orf185	#N/A	#N/A	#N/A		#N/A	#N/A	#N/A
C1orf210	#N/A	#N/A	#N/A		#N/A	#N/A	#N/A
C1orf43	#N/A	#N/A	#N/A		#N/A	#N/A	#N/A
C20orf141	#N/A	#N/A	#N/A		#N/A	#N/A	#N/A
C20orf24	#N/A	#N/A	#N/A		#N/A	#N/A	#N/A
C2CD2L	#N/A	#N/A	#N/A		#N/A	#N/A	#N/A
C2orf16	#N/A	#N/A	#N/A		#N/A	#N/A	#N/A
C2orf74	#N/A	#N/A	#N/A		#N/A	#N/A	#N/A
C2orf83	#N/A	#N/A	#N/A		#N/A	#N/A	#N/A
C2orf92	#N/A	#N/A	#N/A		#N/A	#N/A	#N/A
C3AR1	#N/A	#N/A	#N/A		#N/A	#N/A	#N/A
C3orf18	#N/A	#N/A	#N/A		#N/A	#N/A	#N/A
C3orf52	#N/A	#N/A	#N/A		#N/A	#N/A	#N/A
C3orf80	#N/A	#N/A	#N/A		#N/A	#N/A	#N/A
C4orf3	#N/A	#N/A	#N/A		#N/A	#N/A	#N/A
C5AR1	#N/A	#N/A	#N/A		#N/A	#N/A	#N/A
C5AR2	#N/A	#N/A	#N/A		#N/A	#N/A	#N/A
C5orf15	#N/A	#N/A	#N/A		#N/A	#N/A	#N/A
C5orf42	#N/A	#N/A	#N/A		#N/A	#N/A	#N/A
C5orf60	#N/A	#N/A	#N/A		#N/A	#N/A	#N/A
C6orf10	#N/A	#N/A	#N/A		#N/A	#N/A	#N/A
C6orf136	#N/A	#N/A	#N/A		#N/A	#N/A	#N/A
C6orf47	#N/A	#N/A	#N/A		#N/A	#N/A	#N/A
C6orf89	#N/A	#N/A	#N/A		#N/A	#N/A	#N/A
C9orf57	#N/A	#N/A	#N/A		#N/A	#N/A	#N/A
C9orf84	#N/A	#N/A	#N/A		#N/A	#N/A	#N/A
C9orf92	#N/A	#N/A	#N/A		#N/A	#N/A	#N/A
CA12	#N/A	#N/A	#N/A		#N/A	#N/A	#N/A
CA14	#N/A	#N/A	#N/A		#N/A	#N/A	#N/A
CA4	#N/A	#N/A	#N/A		#N/A	#N/A	#N/A
CA9	#N/A	#N/A	#N/A		#N/A	#N/A	#N/A
CABLES2	#N/A	#N/A	#N/A		#N/A	#N/A	#N/A
CABP7	#N/A	#N/A	#N/A		#N/A	#N/A	#N/A
CACFD1	#N/A	#N/A	#N/A		#N/A	#N/A	#N/A
CACHD1	#N/A	#N/A	#N/A		Cachd1	Cachd1	Cachd1
CACNA1A	#N/A	#N/A	#N/A		#N/A	#N/A	#N/A
CACNA1B	#N/A	Cacna1b	#N/A		#N/A	#N/A	#N/A
CACNA1C	#N/A	#N/A	#N/A		Cacna1c	Cacna1c	Cacna1c
CACNA1D	#N/A	#N/A	#N/A		#N/A	#N/A	#N/A
CACNA1E	#N/A	#N/A	#N/A		#N/A	#N/A	#N/A
CACNA1F	#N/A	#N/A	#N/A		#N/A	#N/A	#N/A
CACNA1G	#N/A	#N/A	#N/A		#N/A	#N/A	#N/A
CACNA1H	#N/A	#N/A	#N/A		#N/A	#N/A	#N/A
CACNA1I	#N/A	#N/A	#N/A		#N/A	#N/A	#N/A
CACNA1S	#N/A	#N/A	#N/A		#N/A	#N/A	#N/A
CACNA2D1	#N/A	#N/A	#N/A		#N/A	Cacna2d1	#N/A
CACNA2D3	#N/A	#N/A	#N/A		#N/A	#N/A	#N/A
CACNA2D4	Cacna2d4	Cacna2d4	Cacna2d4		#N/A	#N/A	#N/A
CACNB4	#N/A	#N/A	#N/A		#N/A	Cacnb4	#N/A
CACNG1	#N/A	#N/A	#N/A		#N/A	#N/A	#N/A
CACNG2	#N/A	#N/A	#N/A		#N/A	#N/A	#N/A
CACNG3	#N/A	#N/A	#N/A		#N/A	#N/A	#N/A
CACNG4	#N/A	#N/A	#N/A		#N/A	#N/A	#N/A
CACNG5	#N/A	#N/A	#N/A		#N/A	#N/A	#N/A
CACNG6	#N/A	#N/A	#N/A		#N/A	#N/A	#N/A
CACNG7	#N/A	#N/A	#N/A		#N/A	#N/A	#N/A
CACNG8	#N/A	#N/A	#N/A		#N/A	#N/A	#N/A
CADM1	Cadm1	Cadm1	#N/A		#N/A	#N/A	#N/A
CADM2	#N/A	Cadm2	#N/A		#N/A	#N/A	#N/A
CADM3	#N/A	#N/A	#N/A		#N/A	#N/A	#N/A
CADM4	Cadm4	Cadm4	Cadm4		#N/A	#N/A	#N/A
CALCR	#N/A	#N/A	#N/A		#N/A	#N/A	#N/A
CALCRL	#N/A	#N/A	#N/A		#N/A	#N/A	#N/A
CALHM1	#N/A	#N/A	#N/A		#N/A	#N/A	#N/A
CALHM2	#N/A	#N/A	#N/A		#N/A	#N/A	#N/A
CALHM3	#N/A	#N/A	#N/A		#N/A	#N/A	#N/A
CALHM4	#N/A	#N/A	#N/A		#N/A	#N/A	#N/A
CALHM5	#N/A	#N/A	#N/A		#N/A	#N/A	#N/A
CALHM6	#N/A	#N/A	#N/A		#N/A	#N/A	#N/A
CALN1	#N/A	#N/A	#N/A		#N/A	#N/A	#N/A
CALY	#N/A	#N/A	#N/A		#N/A	#N/A	#N/A
CAMK1	#N/A	#N/A	#N/A		#N/A	#N/A	#N/A
CAMK1D	Camk1d	Camk1d	#N/A		#N/A	#N/A	#N/A
CAMK1G	#N/A	#N/A	#N/A		#N/A	#N/A	#N/A
CAMK2A	#N/A	#N/A	#N/A		#N/A	#N/A	#N/A
CAMK2B	#N/A	#N/A	#N/A		#N/A	#N/A	#N/A
CAMK2D	#N/A	#N/A	#N/A		#N/A	#N/A	#N/A
CAMK2G	#N/A	#N/A	#N/A		#N/A	#N/A	#N/A
CAMK4	#N/A	#N/A	#N/A		Camk4	Camk4	#N/A
CAMKK2	#N/A	#N/A	#N/A		#N/A	#N/A	#N/A
CAMLG	#N/A	#N/A	#N/A		#N/A	#N/A	#N/A
CANT1	#N/A	#N/A	#N/A		#N/A	#N/A	#N/A
CANX	#N/A	#N/A	#N/A		#N/A	#N/A	#N/A
CARD19	#N/A	#N/A	#N/A		#N/A	#N/A	#N/A
CASD1	#N/A	Casd1	#N/A		#N/A	#N/A	#N/A
CASK	#N/A	#N/A	#N/A		#N/A	#N/A	#N/A
CASR	#N/A	#N/A	#N/A		#N/A	#N/A	#N/A
CATSPER1	#N/A	#N/A	#N/A		#N/A	#N/A	#N/A
CATSPER2	#N/A	#N/A	#N/A		#N/A	#N/A	#N/A
CATSPER3	#N/A	#N/A	#N/A		#N/A	#N/A	#N/A
CATSPER4	#N/A	#N/A	#N/A		#N/A	#N/A	#N/A
CATSPERB	#N/A	#N/A	#N/A		#N/A	#N/A	#N/A
CATSPERD	Catsperd	Catsperd	#N/A		#N/A	#N/A	#N/A
CATSPERE	#N/A	#N/A	#N/A		#N/A	#N/A	#N/A
CATSPERG	#N/A	#N/A	#N/A		#N/A	#N/A	#N/A
CAV1	#N/A	#N/A	#N/A		Cav1	Cav1	#N/A
CAV2	#N/A	#N/A	#N/A		#N/A	#N/A	#N/A
CAV3	#N/A	#N/A	#N/A		#N/A	#N/A	#N/A
CBARP	#N/A	#N/A	#N/A		#N/A	#N/A	#N/A
CCDC107	#N/A	#N/A	#N/A		#N/A	#N/A	#N/A
CCDC136	#N/A	#N/A	#N/A		Ccdc136	Ccdc136	#N/A
CCDC141	#N/A	#N/A	#N/A		#N/A	#N/A	#N/A
CCDC144A	#N/A	#N/A	#N/A		#N/A	#N/A	#N/A
CCDC155	#N/A	#N/A	#N/A		#N/A	#N/A	#N/A
CCDC163	#N/A	#N/A	#N/A		#N/A	#N/A	#N/A
CCDC167	#N/A	#N/A	#N/A		#N/A	#N/A	Ccdc167
CCDC168	#N/A	#N/A	#N/A		#N/A	#N/A	#N/A
CCDC188	#N/A	#N/A	#N/A		#N/A	#N/A	#N/A
CCDC47	#N/A	#N/A	#N/A		#N/A	#N/A	#N/A
CCDC51	#N/A	#N/A	#N/A		#N/A	#N/A	#N/A
CCDC90B	#N/A	#N/A	#N/A		#N/A	#N/A	#N/A
CCKAR	#N/A	#N/A	#N/A		#N/A	#N/A	#N/A
CCKBR	#N/A	#N/A	#N/A		#N/A	#N/A	#N/A
CCL5	#N/A	#N/A	Ccl5		#N/A	#N/A	#N/A
CCL7	#N/A	#N/A	#N/A		#N/A	#N/A	#N/A
CCPG1	#N/A	#N/A	#N/A		#N/A	#N/A	#N/A
CCR1	#N/A	Ccr1	Ccr1		#N/A	#N/A	#N/A
CCR10	#N/A	#N/A	#N/A		#N/A	#N/A	#N/A
CCR2	#N/A	#N/A	#N/A		#N/A	#N/A	#N/A
CCR3	#N/A	#N/A	#N/A		#N/A	#N/A	#N/A
CCR4	#N/A	#N/A	#N/A		#N/A	#N/A	#N/A
CCR5	#N/A	Ccr5	Ccr5		#N/A	#N/A	#N/A
CCR6	#N/A	#N/A	#N/A		#N/A	#N/A	#N/A
CCR7	#N/A	#N/A	Ccr7		#N/A	#N/A	#N/A
CCR8	#N/A	#N/A	#N/A		#N/A	#N/A	#N/A
CCR9	#N/A	#N/A	#N/A		#N/A	#N/A	#N/A
CCRL2	#N/A	#N/A	#N/A		#N/A	#N/A	#N/A
CD101	#N/A	Cd101	Cd101		#N/A	#N/A	#N/A
CD109	#N/A	#N/A	#N/A		#N/A	#N/A	#N/A
CD151	#N/A	#N/A	#N/A		#N/A	#N/A	#N/A
CD163	#N/A	#N/A	#N/A		Cd163	Cd163	Cd163
CD163L1	#N/A	#N/A	#N/A		#N/A	#N/A	#N/A
CD164	Cd164	#N/A	#N/A		#N/A	#N/A	#N/A
CD164L2	#N/A	#N/A	#N/A		#N/A	#N/A	#N/A
CD180	#N/A	#N/A	#N/A		#N/A	#N/A	#N/A
CD19	#N/A	#N/A	#N/A		#N/A	#N/A	#N/A
CD1A	#N/A	#N/A	#N/A		#N/A	#N/A	#N/A
CD1B	#N/A	#N/A	#N/A		#N/A	#N/A	#N/A
CD1C	#N/A	#N/A	#N/A		#N/A	#N/A	#N/A
CD1D	#N/A	#N/A	#N/A		#N/A	#N/A	#N/A
CD1E	#N/A	#N/A	#N/A		#N/A	#N/A	#N/A
CD2	#N/A	#N/A	#N/A		#N/A	#N/A	#N/A
CD200	#N/A	#N/A	#N/A		#N/A	#N/A	#N/A
CD200R1	#N/A	#N/A	#N/A		#N/A	#N/A	#N/A
CD200R1L	#N/A	#N/A	#N/A		#N/A	#N/A	#N/A
CD207	#N/A	#N/A	#N/A		#N/A	#N/A	#N/A
CD209	#N/A	#N/A	#N/A		#N/A	#N/A	#N/A
CD22	#N/A	#N/A	#N/A		#N/A	#N/A	#N/A
CD226	#N/A	#N/A	#N/A		#N/A	#N/A	#N/A
CD244	#N/A	#N/A	#N/A		#N/A	#N/A	#N/A
CD247	#N/A	#N/A	#N/A		#N/A	#N/A	#N/A
CD248	#N/A	#N/A	#N/A		#N/A	#N/A	#N/A
CD27	#N/A	#N/A	#N/A		#N/A	#N/A	#N/A
CD274	#N/A	#N/A	#N/A		#N/A	#N/A	#N/A
CD276	Cd276	Cd276	Cd276		#N/A	#N/A	#N/A
CD28	#N/A	#N/A	#N/A		Cd28	Cd28	#N/A
CD300A	#N/A	#N/A	#N/A		#N/A	#N/A	#N/A
CD300C	#N/A	#N/A	#N/A		#N/A	#N/A	#N/A
CD300E	#N/A	#N/A	#N/A		#N/A	#N/A	#N/A
CD300LB	#N/A	#N/A	#N/A		#N/A	#N/A	#N/A
CD300LD	#N/A	#N/A	#N/A		#N/A	#N/A	#N/A
CD300LF	#N/A	#N/A	#N/A		#N/A	#N/A	#N/A
CD300LG	#N/A	#N/A	#N/A		#N/A	#N/A	#N/A
CD302	#N/A	#N/A	#N/A		#N/A	#N/A	#N/A
CD320	#N/A	#N/A	#N/A		#N/A	Cd320	Cd320
CD33	#N/A	#N/A	Cd33		#N/A	#N/A	#N/A
CD34	#N/A	#N/A	#N/A		#N/A	#N/A	#N/A
CD36	#N/A	#N/A	#N/A		#N/A	#N/A	#N/A
CD37	#N/A	#N/A	#N/A		#N/A	#N/A	#N/A
CD3D	#N/A	#N/A	#N/A		#N/A	#N/A	#N/A
CD3E	#N/A	#N/A	#N/A		#N/A	#N/A	#N/A
CD3G	#N/A	#N/A	#N/A		#N/A	#N/A	#N/A
CD4	#N/A	#N/A	#N/A		#N/A	#N/A	#N/A
CD40	#N/A	#N/A	#N/A		#N/A	#N/A	#N/A
CD40LG	#N/A	#N/A	#N/A		#N/A	#N/A	#N/A
CD44	Cd44	Cd44	Cd44		#N/A	#N/A	#N/A
CD46	#N/A	#N/A	#N/A		#N/A	#N/A	#N/A
CD47	#N/A	#N/A	Cd47		#N/A	#N/A	#N/A
CD48	#N/A	#N/A	#N/A		#N/A	#N/A	#N/A
CD5	#N/A	#N/A	#N/A		#N/A	#N/A	#N/A
CD52	#N/A	#N/A	#N/A		Cd52	Cd52	Cd52
CD53	#N/A	#N/A	#N/A		#N/A	#N/A	#N/A
CD55	#N/A	#N/A	#N/A		#N/A	#N/A	#N/A
CD58	#N/A	#N/A	#N/A		#N/A	#N/A	#N/A
CD59	#N/A	#N/A	#N/A		#N/A	#N/A	#N/A
CD6	#N/A	#N/A	#N/A		#N/A	#N/A	#N/A
CD63	#N/A	#N/A	#N/A		#N/A	#N/A	#N/A
CD68	#N/A	#N/A	#N/A		#N/A	#N/A	#N/A
CD69	#N/A	#N/A	#N/A		#N/A	#N/A	#N/A
CD7	#N/A	#N/A	#N/A		#N/A	#N/A	#N/A
CD70	#N/A	#N/A	#N/A		#N/A	#N/A	#N/A
CD72	#N/A	Cd72	Cd72		#N/A	#N/A	#N/A
CD74	#N/A	#N/A	Cd74		#N/A	#N/A	#N/A
CD79A	#N/A	#N/A	#N/A		#N/A	#N/A	#N/A
CD79B	#N/A	#N/A	#N/A		#N/A	#N/A	#N/A
CD80	#N/A	#N/A	#N/A		#N/A	#N/A	#N/A
CD81	#N/A	#N/A	#N/A		#N/A	#N/A	#N/A
CD82	#N/A	#N/A	#N/A		#N/A	#N/A	#N/A
CD83	#N/A	#N/A	Cd83		#N/A	#N/A	#N/A
CD84	#N/A	#N/A	#N/A		#N/A	#N/A	#N/A
CD86	#N/A	#N/A	Cd86		#N/A	#N/A	#N/A
CD8A	#N/A	#N/A	#N/A		#N/A	#N/A	#N/A
CD8B	#N/A	#N/A	#N/A		#N/A	#N/A	#N/A
CD8B2	#N/A	#N/A	#N/A		#N/A	#N/A	#N/A
CD9	#N/A	#N/A	#N/A		#N/A	#N/A	#N/A
CD93	#N/A	#N/A	#N/A		#N/A	#N/A	#N/A
CD96	#N/A	#N/A	#N/A		#N/A	#N/A	#N/A
CD99	#N/A	#N/A	#N/A		#N/A	#N/A	#N/A
CD99L2	#N/A	#N/A	#N/A		#N/A	#N/A	#N/A
CDAN1	#N/A	#N/A	#N/A		#N/A	#N/A	#N/A
CDC14B	#N/A	#N/A	#N/A		#N/A	#N/A	#N/A
CDCP1	#N/A	#N/A	#N/A		#N/A	#N/A	#N/A
CDCP2	#N/A	#N/A	#N/A		#N/A	#N/A	#N/A
CDH1	Cdh1	Cdh1	Cdh1		#N/A	#N/A	#N/A
CDH10	#N/A	#N/A	#N/A		#N/A	#N/A	#N/A
CDH11	#N/A	#N/A	#N/A		#N/A	#N/A	#N/A
CDH12	#N/A	#N/A	#N/A		#N/A	#N/A	#N/A
CDH15	#N/A	#N/A	#N/A		#N/A	#N/A	#N/A
CDH16	#N/A	#N/A	#N/A		#N/A	#N/A	#N/A
CDH17	Cdh17	Cdh17	Cdh17		#N/A	#N/A	#N/A
CDH18	#N/A	#N/A	#N/A		#N/A	#N/A	#N/A
CDH19	#N/A	#N/A	#N/A		Cdh19	Cdh19	Cdh19
CDH2	#N/A	#N/A	#N/A		#N/A	#N/A	#N/A
CDH20	#N/A	#N/A	#N/A		#N/A	#N/A	#N/A
CDH22	#N/A	#N/A	#N/A		#N/A	#N/A	#N/A
CDH23	#N/A	#N/A	#N/A		#N/A	#N/A	#N/A
CDH24	Cdh24	Cdh24	Cdh24		#N/A	#N/A	#N/A
CDH26	#N/A	#N/A	#N/A		#N/A	#N/A	#N/A
CDH3	#N/A	#N/A	#N/A		#N/A	#N/A	#N/A
CDH4	#N/A	#N/A	#N/A		#N/A	#N/A	#N/A
CDH5	#N/A	#N/A	#N/A		#N/A	#N/A	#N/A
CDH6	#N/A	#N/A	#N/A		#N/A	#N/A	#N/A
CDH7	#N/A	#N/A	#N/A		#N/A	#N/A	#N/A
CDH8	#N/A	#N/A	#N/A		#N/A	#N/A	#N/A
CDH9	#N/A	#N/A	#N/A		#N/A	#N/A	#N/A
CDHR1	Cdhr1	Cdhr1	Cdhr1		#N/A	#N/A	#N/A
CDHR2	#N/A	#N/A	#N/A		#N/A	#N/A	#N/A
CDHR3	#N/A	#N/A	#N/A		#N/A	#N/A	#N/A
CDHR4	#N/A	#N/A	#N/A		#N/A	#N/A	#N/A
CDHR5	#N/A	Cdhr5	Cdhr5		#N/A	#N/A	#N/A
CDIP1	#N/A	#N/A	#N/A		#N/A	#N/A	#N/A
CDIPT	#N/A	#N/A	#N/A		#N/A	#N/A	#N/A
CDKAL1	#N/A	#N/A	#N/A		#N/A	#N/A	#N/A
CDON	#N/A	#N/A	#N/A		#N/A	#N/A	#N/A
CDRT15L2	#N/A	#N/A	#N/A		#N/A	#N/A	#N/A
CDS1	#N/A	#N/A	#N/A		#N/A	#N/A	#N/A
CDS2	#N/A	#N/A	#N/A		#N/A	Cds2	Cds2
CEACAM1	#N/A	#N/A	#N/A		#N/A	#N/A	#N/A
CEACAM19	#N/A	#N/A	#N/A		#N/A	#N/A	#N/A
CEACAM20	#N/A	#N/A	#N/A		#N/A	#N/A	#N/A
CEACAM21	#N/A	#N/A	#N/A		#N/A	#N/A	#N/A
CEACAM3	#N/A	#N/A	#N/A		#N/A	#N/A	#N/A
CEACAM4	#N/A	#N/A	#N/A		#N/A	#N/A	#N/A
CEACAM6	#N/A	#N/A	#N/A		#N/A	#N/A	#N/A
CEACAM7	#N/A	#N/A	#N/A		#N/A	#N/A	#N/A
CEBPZOS	#N/A	#N/A	#N/A		#N/A	#N/A	#N/A
CELSR1	Celsr1	Celsr1	Celsr1		#N/A	#N/A	#N/A
CELSR2	Celsr2	Celsr2	Celsr2		#N/A	#N/A	#N/A
CELSR3	#N/A	#N/A	#N/A		#N/A	#N/A	#N/A
CEND1	#N/A	#N/A	#N/A		#N/A	Cend1	#N/A
CEP170	#N/A	#N/A	#N/A		#N/A	#N/A	#N/A
CEP95	#N/A	#N/A	#N/A		#N/A	#N/A	#N/A
CEPT1	Cept1	Cept1	#N/A		#N/A	#N/A	#N/A
CERS1	#N/A	#N/A	#N/A		#N/A	#N/A	#N/A
CERS2	#N/A	#N/A	#N/A		#N/A	#N/A	#N/A
CERS3	#N/A	#N/A	#N/A		#N/A	#N/A	#N/A
CERS4	#N/A	#N/A	#N/A		#N/A	#N/A	#N/A
CERS5	Cers5	Cers5	Cers5		#N/A	#N/A	#N/A
CERS6	#N/A	#N/A	#N/A		#N/A	#N/A	#N/A
CES2	#N/A	#N/A	#N/A		#N/A	#N/A	#N/A
CFAP46	#N/A	#N/A	#N/A		#N/A	#N/A	#N/A
CFAP47	#N/A	#N/A	#N/A		#N/A	#N/A	#N/A
CFAP54	#N/A	#N/A	#N/A		#N/A	#N/A	#N/A
CFAP57	#N/A	#N/A	#N/A		#N/A	#N/A	#N/A
CFAP61	#N/A	#N/A	#N/A		#N/A	#N/A	#N/A
CFTR	Cftr	Cftr	Cftr		#N/A	#N/A	#N/A
CGRRF1	#N/A	#N/A	#N/A		#N/A	#N/A	#N/A
CH25H	#N/A	#N/A	Ch25h		#N/A	#N/A	#N/A
CHEK2	#N/A	#N/A	#N/A		#N/A	#N/A	#N/A
CHIC1	#N/A	#N/A	#N/A		#N/A	#N/A	#N/A
CHIC2	#N/A	#N/A	#N/A		#N/A	#N/A	#N/A
CHL1	Chl1	Chl1	Chl1		#N/A	#N/A	#N/A
CHML	#N/A	#N/A	#N/A		#N/A	#N/A	#N/A
CHODL	Chodl	Chodl	Chodl		#N/A	#N/A	#N/A
CHPT1	#N/A	#N/A	#N/A		#N/A	#N/A	#N/A
CHRFAM7A	#N/A	#N/A	#N/A		#N/A	#N/A	#N/A
CHRM1	#N/A	#N/A	#N/A		#N/A	Chrm1	Chrm1
CHRM2	#N/A	#N/A	#N/A		Chrm2	Chrm2	Chrm2
CHRM3	#N/A	#N/A	#N/A		#N/A	#N/A	#N/A
CHRM4	#N/A	#N/A	#N/A		#N/A	#N/A	#N/A
CHRM5	#N/A	#N/A	#N/A		#N/A	#N/A	#N/A
CHRNA1	#N/A	#N/A	#N/A		#N/A	#N/A	#N/A
CHRNA10	#N/A	#N/A	#N/A		#N/A	#N/A	#N/A
CHRNA2	#N/A	#N/A	#N/A		#N/A	#N/A	#N/A
CHRNA3	#N/A	#N/A	#N/A		#N/A	#N/A	#N/A
CHRNA4	#N/A	#N/A	#N/A		#N/A	#N/A	#N/A
CHRNA5	#N/A	#N/A	#N/A		#N/A	#N/A	#N/A
CHRNA6	#N/A	#N/A	#N/A		#N/A	#N/A	#N/A
CHRNA7	#N/A	#N/A	#N/A		#N/A	#N/A	#N/A
CHRNA9	#N/A	#N/A	#N/A		#N/A	#N/A	#N/A
CHRNB1	Chrnb1	Chrnb1	Chrnb1		#N/A	#N/A	#N/A
CHRNB2	#N/A	#N/A	#N/A		#N/A	#N/A	#N/A
CHRNB3	#N/A	#N/A	#N/A		#N/A	#N/A	#N/A
CHRNB4	#N/A	#N/A	#N/A		#N/A	#N/A	#N/A
CHRND	#N/A	#N/A	#N/A		#N/A	#N/A	#N/A
CHRNE	#N/A	#N/A	#N/A		#N/A	#N/A	#N/A
CHRNG	#N/A	#N/A	#N/A		#N/A	#N/A	#N/A
CHST10	#N/A	#N/A	#N/A		#N/A	#N/A	#N/A
CHST12	#N/A	#N/A	#N/A		#N/A	#N/A	#N/A
CHST14	#N/A	#N/A	#N/A		#N/A	#N/A	#N/A
CHST15	#N/A	#N/A	#N/A		#N/A	#N/A	#N/A
CHST2	#N/A	#N/A	#N/A		#N/A	#N/A	#N/A
CHST3	#N/A	#N/A	#N/A		#N/A	#N/A	#N/A
CHST5	#N/A	#N/A	#N/A		#N/A	#N/A	#N/A
CHST9	Chst9	Chst9	Chst9		#N/A	#N/A	#N/A
CIP2A	#N/A	#N/A	#N/A		#N/A	#N/A	#N/A
CISD1	#N/A	#N/A	#N/A		#N/A	#N/A	#N/A
CISD2	#N/A	#N/A	#N/A		#N/A	#N/A	#N/A
CKAP4	#N/A	#N/A	#N/A		#N/A	#N/A	#N/A
CKLF	#N/A	#N/A	#N/A		#N/A	#N/A	#N/A
CKLF-CMTM1	#N/A	#N/A	#N/A		#N/A	#N/A	#N/A
CLCA2	#N/A	#N/A	#N/A		#N/A	#N/A	#N/A
CLCA4	#N/A	#N/A	#N/A		#N/A	#N/A	#N/A
CLCC1	#N/A	#N/A	#N/A		#N/A	#N/A	#N/A
CLCN1	#N/A	#N/A	#N/A		#N/A	#N/A	#N/A
CLCN2	Clcn2	Clcn2	Clcn2		#N/A	#N/A	#N/A
CLCN3	#N/A	#N/A	#N/A		#N/A	#N/A	#N/A
CLCN4	#N/A	#N/A	#N/A		#N/A	#N/A	#N/A
CLCN5	#N/A	#N/A	#N/A		#N/A	#N/A	#N/A
CLCN6	#N/A	#N/A	#N/A		#N/A	#N/A	#N/A
CLCN7	#N/A	#N/A	#N/A		#N/A	#N/A	#N/A
CLCNKA	#N/A	#N/A	#N/A		#N/A	#N/A	#N/A
CLCNKB	#N/A	#N/A	#N/A		#N/A	#N/A	#N/A
CLDN1	#N/A	#N/A	#N/A		#N/A	#N/A	#N/A
CLDN10	Cldn10	Cldn10	Cldn10		#N/A	#N/A	#N/A
CLDN11	#N/A	#N/A	#N/A		#N/A	#N/A	#N/A
CLDN12	#N/A	#N/A	#N/A		#N/A	#N/A	#N/A
CLDN14	#N/A	#N/A	#N/A		#N/A	#N/A	#N/A
CLDN15	#N/A	#N/A	#N/A		#N/A	#N/A	#N/A
CLDN16	#N/A	#N/A	#N/A		#N/A	#N/A	#N/A
CLDN17	#N/A	#N/A	#N/A		#N/A	#N/A	#N/A
CLDN18	#N/A	#N/A	#N/A		#N/A	#N/A	#N/A
CLDN19	#N/A	#N/A	#N/A		#N/A	#N/A	#N/A
CLDN2	#N/A	Cldn2	Cldn2		#N/A	#N/A	#N/A
CLDN20	#N/A	#N/A	#N/A		#N/A	#N/A	#N/A
CLDN22	#N/A	#N/A	#N/A		#N/A	#N/A	#N/A
CLDN23	#N/A	#N/A	#N/A		#N/A	#N/A	#N/A
CLDN24	#N/A	#N/A	#N/A		#N/A	#N/A	#N/A
CLDN25	#N/A	#N/A	#N/A		#N/A	#N/A	#N/A
CLDN3	#N/A	#N/A	#N/A		#N/A	#N/A	#N/A
CLDN34	#N/A	#N/A	#N/A		#N/A	#N/A	#N/A
CLDN4	#N/A	#N/A	#N/A		#N/A	#N/A	#N/A
CLDN5	#N/A	#N/A	#N/A		#N/A	#N/A	#N/A
CLDN6	#N/A	#N/A	#N/A		#N/A	#N/A	#N/A
CLDN7	#N/A	Cldn7	Cldn7		#N/A	#N/A	#N/A
CLDN8	#N/A	#N/A	#N/A		#N/A	#N/A	Cldn8
CLDN9	#N/A	#N/A	#N/A		#N/A	#N/A	#N/A
CLDND1	#N/A	#N/A	#N/A		#N/A	#N/A	#N/A
CLDND2	#N/A	#N/A	#N/A		#N/A	#N/A	#N/A
CLEC10A	#N/A	#N/A	#N/A		#N/A	#N/A	#N/A
CLEC12A	#N/A	#N/A	#N/A		#N/A	#N/A	#N/A
CLEC12B	#N/A	#N/A	#N/A		#N/A	#N/A	#N/A
CLEC14A	#N/A	#N/A	#N/A		#N/A	#N/A	#N/A
CLEC17A	#N/A	#N/A	#N/A		#N/A	#N/A	#N/A
CLEC1A	#N/A	#N/A	#N/A		#N/A	#N/A	#N/A
CLEC1B	#N/A	#N/A	#N/A		#N/A	#N/A	#N/A
CLEC2A	#N/A	#N/A	#N/A		#N/A	#N/A	#N/A
CLEC2D	#N/A	#N/A	#N/A		#N/A	#N/A	#N/A
CLEC2L	#N/A	#N/A	#N/A		#N/A	#N/A	#N/A
CLEC4A	#N/A	#N/A	#N/A		#N/A	#N/A	#N/A
CLEC4C	#N/A	#N/A	#N/A		#N/A	#N/A	#N/A
CLEC4E	#N/A	#N/A	Clec4e		#N/A	#N/A	#N/A
CLEC4F	#N/A	#N/A	#N/A		#N/A	#N/A	#N/A
CLEC4G	#N/A	#N/A	#N/A		#N/A	#N/A	#N/A
CLEC4M	#N/A	#N/A	#N/A		#N/A	#N/A	#N/A
CLEC5A	Clec5a	Clec5a	Clec5a		#N/A	#N/A	#N/A
CLEC6A	#N/A	#N/A	#N/A		#N/A	#N/A	#N/A
CLEC7A	#N/A	#N/A	#N/A		#N/A	#N/A	#N/A
CLEC9A	#N/A	#N/A	#N/A		#N/A	#N/A	#N/A
CLECL1	#N/A	#N/A	#N/A		#N/A	#N/A	#N/A
CLGN	#N/A	#N/A	#N/A		#N/A	#N/A	#N/A
CLK1	#N/A	#N/A	#N/A		#N/A	#N/A	#N/A
CLK4	#N/A	#N/A	#N/A		#N/A	#N/A	#N/A
CLMN	Clmn	Clmn	Clmn		#N/A	#N/A	#N/A
CLMP	#N/A	#N/A	#N/A		#N/A	#N/A	#N/A
CLN3	Cln3	Cln3	Cln3		#N/A	#N/A	#N/A
CLN5	#N/A	#N/A	#N/A		#N/A	#N/A	#N/A
CLN6	#N/A	#N/A	#N/A		#N/A	#N/A	#N/A
CLN8	#N/A	#N/A	#N/A		#N/A	#N/A	#N/A
CLPTM1	#N/A	#N/A	#N/A		#N/A	#N/A	#N/A
CLPTM1L	#N/A	#N/A	#N/A		#N/A	#N/A	#N/A
CLRN1	#N/A	#N/A	#N/A		#N/A	#N/A	#N/A
CLRN2	#N/A	#N/A	#N/A		#N/A	#N/A	#N/A
CLRN3	#N/A	#N/A	#N/A		#N/A	#N/A	#N/A
CLSTN1	#N/A	#N/A	#N/A		#N/A	#N/A	#N/A
CLSTN2	#N/A	#N/A	#N/A		#N/A	Clstn2	#N/A
CLSTN3	#N/A	#N/A	#N/A		#N/A	#N/A	#N/A
CLTRN	#N/A	#N/A	#N/A		#N/A	#N/A	#N/A
CLYBL	#N/A	#N/A	#N/A		#N/A	#N/A	#N/A
CMKLR1	#N/A	#N/A	#N/A		#N/A	#N/A	#N/A
CMTM1	#N/A	#N/A	#N/A		#N/A	#N/A	#N/A
CMTM2	#N/A	#N/A	#N/A		#N/A	#N/A	#N/A
CMTM3	#N/A	#N/A	#N/A		#N/A	#N/A	#N/A
CMTM4	#N/A	#N/A	#N/A		#N/A	#N/A	#N/A
CMTM5	#N/A	#N/A	#N/A		#N/A	#N/A	#N/A
CMTM6	#N/A	#N/A	#N/A		#N/A	#N/A	#N/A
CMTM7	#N/A	#N/A	Cmtm7		#N/A	#N/A	#N/A
CMTM8	Cmtm8	#N/A	#N/A		#N/A	#N/A	#N/A
CMTR2	#N/A	#N/A	#N/A		#N/A	#N/A	#N/A
CNEP1R1	#N/A	#N/A	#N/A		#N/A	#N/A	#N/A
CNGA1	#N/A	#N/A	#N/A		#N/A	#N/A	#N/A
CNGA2	#N/A	#N/A	#N/A		#N/A	#N/A	#N/A
CNGA3	#N/A	#N/A	#N/A		#N/A	#N/A	#N/A
CNGA4	#N/A	#N/A	#N/A		#N/A	#N/A	#N/A
CNGB1	#N/A	#N/A	#N/A		#N/A	#N/A	#N/A
CNGB3	#N/A	#N/A	#N/A		#N/A	#N/A	#N/A
CNIH1	#N/A	#N/A	#N/A		#N/A	#N/A	#N/A
CNIH2	#N/A	#N/A	#N/A		#N/A	#N/A	#N/A
CNIH3	#N/A	#N/A	#N/A		#N/A	#N/A	#N/A
CNIH4	#N/A	#N/A	#N/A		#N/A	#N/A	#N/A
CNMD	#N/A	#N/A	#N/A		#N/A	#N/A	#N/A
CNNM1	#N/A	#N/A	#N/A		Cnnm1	Cnnm1	Cnnm1
CNNM2	#N/A	#N/A	Cnnm2		#N/A	#N/A	#N/A
CNNM3	#N/A	#N/A	#N/A		#N/A	#N/A	#N/A
CNNM4	Cnnm4	Cnnm4	Cnnm4		#N/A	#N/A	#N/A
CNOT1	#N/A	#N/A	#N/A		#N/A	#N/A	#N/A
CNPPD1	#N/A	#N/A	#N/A		#N/A	#N/A	#N/A
CNR1	Cnr1	Cnr1	Cnr1		#N/A	#N/A	#N/A
CNR2	#N/A	#N/A	#N/A		#N/A	#N/A	#N/A
CNST	#N/A	#N/A	#N/A		#N/A	#N/A	#N/A
CNTD1	#N/A	#N/A	#N/A		#N/A	#N/A	#N/A
CNTFR	#N/A	#N/A	#N/A		#N/A	#N/A	#N/A
CNTN6	#N/A	#N/A	#N/A		#N/A	#N/A	#N/A
CNTNAP1	#N/A	#N/A	#N/A		#N/A	#N/A	#N/A
CNTNAP2	#N/A	#N/A	#N/A		#N/A	#N/A	Cntnap2
CNTNAP3	#N/A	#N/A	#N/A		#N/A	#N/A	#N/A
CNTNAP3B	#N/A	#N/A	#N/A		#N/A	#N/A	#N/A
CNTNAP4	#N/A	#N/A	#N/A		#N/A	#N/A	#N/A
CNTNAP5	#N/A	#N/A	#N/A		#N/A	#N/A	#N/A
COA1	#N/A	#N/A	#N/A		#N/A	#N/A	#N/A
COA3	#N/A	#N/A	#N/A		#N/A	#N/A	#N/A
COL13A1	#N/A	#N/A	#N/A		Col13a1	Col13a1	#N/A
COL17A1	#N/A	Col17a1	Col17a1		#N/A	#N/A	#N/A
COL25A1	Col25a1	Col25a1	Col25a1		#N/A	#N/A	#N/A
COLEC12	#N/A	#N/A	#N/A		#N/A	#N/A	#N/A
COMT	#N/A	#N/A	#N/A		#N/A	#N/A	#N/A
COQ2	#N/A	#N/A	#N/A		#N/A	#N/A	#N/A
COQ7	Coq7	Coq7	#N/A		#N/A	#N/A	#N/A
CORIN	#N/A	#N/A	#N/A		#N/A	#N/A	#N/A
COX10	#N/A	#N/A	#N/A		#N/A	#N/A	#N/A
COX11	#N/A	#N/A	#N/A		#N/A	#N/A	#N/A
COX14	#N/A	#N/A	#N/A		#N/A	#N/A	#N/A
COX15	#N/A	#N/A	#N/A		#N/A	#N/A	#N/A
COX18	#N/A	#N/A	#N/A		#N/A	#N/A	#N/A
COX20	#N/A	#N/A	#N/A		#N/A	#N/A	#N/A
COX4I1	#N/A	#N/A	#N/A		#N/A	#N/A	#N/A
COX4I2	#N/A	#N/A	#N/A		#N/A	#N/A	#N/A
COX6A1	#N/A	#N/A	#N/A		#N/A	#N/A	#N/A
COX6C	#N/A	#N/A	#N/A		#N/A	#N/A	#N/A
COX7A1	#N/A	#N/A	#N/A		#N/A	#N/A	#N/A
COX7A2	#N/A	#N/A	#N/A		#N/A	#N/A	#N/A
COX7A2L	#N/A	#N/A	#N/A		#N/A	#N/A	#N/A
COX7B	#N/A	#N/A	#N/A		#N/A	#N/A	#N/A
COX7B2	#N/A	#N/A	#N/A		#N/A	#N/A	#N/A
COX7C	#N/A	#N/A	#N/A		#N/A	#N/A	#N/A
COX8A	#N/A	#N/A	#N/A		#N/A	#N/A	#N/A
COX8C	#N/A	#N/A	#N/A		#N/A	#N/A	#N/A
CPD	#N/A	#N/A	#N/A		#N/A	#N/A	#N/A
CPM	#N/A	#N/A	#N/A		#N/A	#N/A	#N/A
CPOX	#N/A	#N/A	#N/A		#N/A	#N/A	#N/A
CPT1A	#N/A	#N/A	#N/A		#N/A	#N/A	#N/A
CPT1B	#N/A	#N/A	#N/A		#N/A	#N/A	#N/A
CPT1C	#N/A	#N/A	#N/A		#N/A	#N/A	#N/A
CR1	#N/A	#N/A	#N/A		#N/A	#N/A	#N/A
CR2	#N/A	#N/A	#N/A		#N/A	#N/A	#N/A
CRB1	#N/A	#N/A	#N/A		#N/A	#N/A	#N/A
CRB2	#N/A	#N/A	#N/A		#N/A	Crb2	#N/A
CRB3	#N/A	#N/A	#N/A		#N/A	#N/A	#N/A
CREB3	#N/A	#N/A	#N/A		#N/A	#N/A	#N/A
CREB3L1	#N/A	#N/A	#N/A		#N/A	#N/A	#N/A
CREB3L2	#N/A	#N/A	#N/A		#N/A	#N/A	#N/A
CREB3L3	#N/A	#N/A	#N/A		#N/A	#N/A	#N/A
CREB3L4	#N/A	#N/A	#N/A		#N/A	#N/A	#N/A
CRELD1	#N/A	#N/A	#N/A		#N/A	#N/A	#N/A
CRHR1	#N/A	#N/A	#N/A		#N/A	#N/A	#N/A
CRHR2	#N/A	#N/A	#N/A		#N/A	#N/A	#N/A
CRIM1	#N/A	#N/A	#N/A		#N/A	#N/A	#N/A
CRLF2	#N/A	#N/A	#N/A		#N/A	#N/A	#N/A
CRLS1	#N/A	#N/A	#N/A		#N/A	#N/A	#N/A
CRTAM	#N/A	#N/A	#N/A		#N/A	#N/A	#N/A
CRYAB	#N/A	#N/A	#N/A		#N/A	#N/A	#N/A
CS	#N/A	#N/A	#N/A		#N/A	#N/A	#N/A
CSF1	#N/A	#N/A	#N/A		#N/A	#N/A	#N/A
CSF1R	#N/A	#N/A	#N/A		#N/A	#N/A	#N/A
CSF2RA	#N/A	#N/A	#N/A		#N/A	#N/A	#N/A
CSF2RB	#N/A	#N/A	#N/A		#N/A	#N/A	#N/A
CSF3R	Csf3r	Csf3r	Csf3r		#N/A	#N/A	#N/A
CSMD1	#N/A	#N/A	#N/A		Csmd1	Csmd1	#N/A
CSMD2	#N/A	#N/A	#N/A		#N/A	#N/A	#N/A
CSMD3	#N/A	#N/A	#N/A		#N/A	#N/A	#N/A
CSNK1G1	#N/A	#N/A	#N/A		#N/A	#N/A	#N/A
CSPG4	#N/A	#N/A	#N/A		#N/A	#N/A	#N/A
CSPG5	#N/A	#N/A	#N/A		#N/A	#N/A	#N/A
CTAGE1	#N/A	#N/A	#N/A		#N/A	#N/A	#N/A
CTAGE15	#N/A	#N/A	#N/A		#N/A	#N/A	#N/A
CTAGE4	#N/A	#N/A	#N/A		#N/A	#N/A	#N/A
CTAGE5	#N/A	#N/A	#N/A		#N/A	#N/A	#N/A
CTAGE6	#N/A	#N/A	#N/A		#N/A	#N/A	#N/A
CTAGE8	#N/A	#N/A	#N/A		#N/A	#N/A	#N/A
CTAGE9	#N/A	#N/A	#N/A		#N/A	#N/A	#N/A
CTCFL	#N/A	#N/A	#N/A		#N/A	#N/A	#N/A
CTDNEP1	#N/A	#N/A	#N/A		#N/A	#N/A	#N/A
CTLA4	#N/A	#N/A	#N/A		#N/A	#N/A	#N/A
CTNS	#N/A	#N/A	#N/A		#N/A	Ctns	Ctns
CTSK	#N/A	#N/A	#N/A		#N/A	#N/A	#N/A
CTXN1	#N/A	#N/A	#N/A		#N/A	#N/A	#N/A
CTXN2	#N/A	#N/A	#N/A		#N/A	#N/A	#N/A
CTXN3	#N/A	#N/A	#N/A		#N/A	#N/A	#N/A
CTXND1	#N/A	#N/A	#N/A		#N/A	#N/A	#N/A
CTXND2	#N/A	#N/A	#N/A		#N/A	#N/A	#N/A
CUX1	#N/A	#N/A	#N/A		#N/A	#N/A	#N/A
CUX2	#N/A	#N/A	#N/A		Cux2	Cux2	Cux2
CUZD1	#N/A	#N/A	#N/A		#N/A	#N/A	#N/A
CWH43	#N/A	#N/A	#N/A		#N/A	#N/A	#N/A
CX3CL1	Cx3cl1	Cx3cl1	Cx3cl1		#N/A	#N/A	#N/A
CX3CR1	#N/A	Cx3cr1	Cx3cr1		#N/A	#N/A	#N/A
CXADR	Cxadr	Cxadr	Cxadr		#N/A	#N/A	#N/A
CXCL16	Cxcl16	Cxcl16	Cxcl16		#N/A	#N/A	#N/A
CXCR1	#N/A	#N/A	#N/A		#N/A	#N/A	#N/A
CXCR2	#N/A	Cxcr2	#N/A		#N/A	#N/A	#N/A
CXCR3	#N/A	#N/A	#N/A		#N/A	#N/A	#N/A
CXCR4	Cxcr4	Cxcr4	Cxcr4		#N/A	#N/A	#N/A
CXCR5	#N/A	#N/A	#N/A		#N/A	#N/A	#N/A
CXCR6	#N/A	#N/A	#N/A		#N/A	#N/A	#N/A
CXorf66	#N/A	#N/A	#N/A		#N/A	#N/A	#N/A
CYB561	#N/A	#N/A	#N/A		#N/A	#N/A	#N/A
CYB561A3	#N/A	#N/A	#N/A		#N/A	#N/A	#N/A
CYB561D1	#N/A	#N/A	#N/A		#N/A	#N/A	#N/A
CYB561D2	#N/A	#N/A	#N/A		#N/A	#N/A	#N/A
CYB5A	#N/A	#N/A	#N/A		#N/A	#N/A	#N/A
CYB5B	#N/A	#N/A	#N/A		#N/A	#N/A	#N/A
CYB5R2	#N/A	#N/A	#N/A		Cyb5r2	Cyb5r2	#N/A
CYB5R3	#N/A	#N/A	#N/A		#N/A	#N/A	#N/A
CYBA	Cyba	Cyba	Cyba		#N/A	#N/A	#N/A
CYBB	#N/A	#N/A	#N/A		#N/A	#N/A	#N/A
CYBRD1	#N/A	#N/A	#N/A		#N/A	#N/A	#N/A
CYC1	#N/A	#N/A	#N/A		#N/A	#N/A	#N/A
CYHR1	#N/A	#N/A	#N/A		#N/A	#N/A	#N/A
CYP19A1	#N/A	#N/A	#N/A		#N/A	#N/A	#N/A
CYP1A1	#N/A	#N/A	#N/A		#N/A	Cyp1a1	#N/A
CYP1A2	#N/A	#N/A	#N/A		#N/A	#N/A	#N/A
CYP1B1	#N/A	#N/A	#N/A		#N/A	#N/A	#N/A
CYP20A1	#N/A	#N/A	#N/A		Cyp20a1	Cyp20a1	#N/A
CYP26C1	#N/A	#N/A	#N/A		#N/A	#N/A	#N/A
CYP2D6	#N/A	#N/A	#N/A		#N/A	#N/A	#N/A
CYP2S1	Cyp2s1	Cyp2s1	#N/A		#N/A	#N/A	#N/A
CYP2U1	#N/A	#N/A	#N/A		#N/A	#N/A	#N/A
CYP39A1	#N/A	#N/A	#N/A		#N/A	#N/A	#N/A
CYP3A4	#N/A	#N/A	#N/A		#N/A	#N/A	#N/A
CYP3A43	#N/A	#N/A	#N/A		#N/A	#N/A	#N/A
CYP3A5	#N/A	#N/A	#N/A		#N/A	#N/A	#N/A
CYP3A7	#N/A	#N/A	#N/A		#N/A	#N/A	#N/A
CYP3A7-CYP3A51P	#N/A	#N/A	#N/A		#N/A	#N/A	#N/A
CYP4A11	#N/A	#N/A	#N/A		#N/A	#N/A	#N/A
CYP4A22	#N/A	#N/A	#N/A		#N/A	#N/A	#N/A
CYP4B1	#N/A	#N/A	#N/A		#N/A	#N/A	#N/A
CYP4F12	#N/A	#N/A	#N/A		#N/A	#N/A	#N/A
CYP4F2	#N/A	#N/A	#N/A		#N/A	#N/A	#N/A
CYP4F22	#N/A	#N/A	#N/A		#N/A	#N/A	#N/A
CYP4F8	#N/A	#N/A	#N/A		#N/A	#N/A	#N/A
CYP4V2	#N/A	#N/A	#N/A		#N/A	#N/A	#N/A
CYP4X1	#N/A	#N/A	#N/A		#N/A	#N/A	#N/A
CYP4Z1	#N/A	#N/A	#N/A		#N/A	#N/A	#N/A
CYP51A1	#N/A	#N/A	#N/A		#N/A	#N/A	#N/A
CYP7B1	#N/A	#N/A	#N/A		#N/A	#N/A	#N/A
CYP8B1	#N/A	#N/A	#N/A		#N/A	#N/A	#N/A
CYSLTR1	#N/A	#N/A	#N/A		#N/A	#N/A	#N/A
CYSLTR2	#N/A	Cysltr2	Cysltr2		#N/A	#N/A	#N/A
CYYR1	#N/A	#N/A	#N/A		#N/A	#N/A	#N/A
DAD1	#N/A	#N/A	#N/A		#N/A	#N/A	#N/A
DAG1	#N/A	#N/A	#N/A		#N/A	#N/A	#N/A
DAGLA	#N/A	#N/A	#N/A		#N/A	#N/A	#N/A
DAGLB	#N/A	#N/A	#N/A		#N/A	#N/A	#N/A
DAPK1	#N/A	#N/A	#N/A		#N/A	#N/A	#N/A
DAPK2	Dapk2	Dapk2	Dapk2		#N/A	#N/A	#N/A
DAPK3	#N/A	#N/A	#N/A		#N/A	#N/A	#N/A
DAPL1	Dapl1	Dapl1	Dapl1		#N/A	#N/A	#N/A
DCAF17	#N/A	#N/A	#N/A		#N/A	#N/A	#N/A
DCAKD	#N/A	#N/A	#N/A		#N/A	#N/A	#N/A
DCBLD1	Dcbld1	Dcbld1	Dcbld1		#N/A	#N/A	#N/A
DCBLD2	#N/A	#N/A	#N/A		#N/A	#N/A	#N/A
DCC	#N/A	#N/A	#N/A		#N/A	#N/A	#N/A
DCHS1	#N/A	#N/A	#N/A		#N/A	#N/A	#N/A
DCHS2	#N/A	#N/A	#N/A		#N/A	#N/A	#N/A
DCLK1	#N/A	Dclk1	Dclk1		#N/A	#N/A	#N/A
DCLK3	#N/A	Dclk3	#N/A		#N/A	#N/A	#N/A
DCP1B	#N/A	#N/A	#N/A		#N/A	#N/A	#N/A
DCST1	#N/A	#N/A	#N/A		#N/A	#N/A	#N/A
DCST2	#N/A	#N/A	#N/A		#N/A	#N/A	#N/A
DCSTAMP	#N/A	#N/A	#N/A		#N/A	#N/A	#N/A
DCT	#N/A	#N/A	#N/A		#N/A	#N/A	#N/A
DDO	#N/A	#N/A	#N/A		#N/A	#N/A	#N/A
DDOST	#N/A	#N/A	#N/A		#N/A	#N/A	#N/A
DDR1	#N/A	#N/A	#N/A		#N/A	#N/A	#N/A
DDR2	#N/A	#N/A	#N/A		Ddr2	Ddr2	#N/A
DDX3X	#N/A	#N/A	#N/A		#N/A	#N/A	#N/A
DEGS1	#N/A	#N/A	#N/A		#N/A	#N/A	#N/A
DEGS2	#N/A	#N/A	#N/A		Degs2	Degs2	Degs2
DENND1A	#N/A	#N/A	#N/A		#N/A	#N/A	#N/A
DENND1B	#N/A	#N/A	#N/A		#N/A	#N/A	#N/A
DENND3	#N/A	#N/A	#N/A		Dennd3	Dennd3	Dennd3
DENND4B	#N/A	#N/A	#N/A		#N/A	#N/A	#N/A
DENND4C	#N/A	#N/A	#N/A		#N/A	#N/A	#N/A
DENND5A	#N/A	#N/A	#N/A		#N/A	#N/A	#N/A
DENND5B	#N/A	#N/A	#N/A		#N/A	#N/A	#N/A
DERL1	#N/A	#N/A	#N/A		#N/A	#N/A	#N/A
DERL2	#N/A	#N/A	#N/A		#N/A	#N/A	#N/A
DERL3	#N/A	#N/A	#N/A		Derl3	Derl3	Derl3
DEUP1	#N/A	#N/A	#N/A		#N/A	#N/A	#N/A
DEXI	#N/A	#N/A	#N/A		#N/A	#N/A	#N/A
DGAT1	#N/A	#N/A	#N/A		#N/A	#N/A	#N/A
DGAT2	Dgat2	Dgat2	Dgat2		#N/A	#N/A	#N/A
DGAT2L6	#N/A	#N/A	#N/A		#N/A	#N/A	#N/A
DGCR2	#N/A	#N/A	#N/A		#N/A	#N/A	#N/A
DGKE	#N/A	#N/A	#N/A		#N/A	#N/A	#N/A
DHCR24	Dhcr24	Dhcr24	Dhcr24		#N/A	#N/A	#N/A
DHCR7	#N/A	Dhcr7	Dhcr7		#N/A	#N/A	#N/A
DHODH	#N/A	#N/A	#N/A		#N/A	#N/A	#N/A
DHRS3	Dhrs3	Dhrs3	Dhrs3		#N/A	#N/A	#N/A
DHRS7B	#N/A	#N/A	#N/A		#N/A	#N/A	#N/A
DHRS9	Dhrs9	Dhrs9	Dhrs9		#N/A	#N/A	#N/A
DHX36	#N/A	#N/A	#N/A		#N/A	#N/A	#N/A
DIABLO	#N/A	#N/A	#N/A		#N/A	#N/A	#N/A
DIABLO	#N/A	#N/A	#N/A		#N/A	#N/A	#N/A
DIO1	#N/A	#N/A	#N/A		#N/A	#N/A	#N/A
DIO2	#N/A	#N/A	#N/A		#N/A	#N/A	#N/A
DIO3	#N/A	#N/A	#N/A		#N/A	#N/A	#N/A
DIP2A	#N/A	#N/A	#N/A		#N/A	#N/A	#N/A
DIP2C	#N/A	#N/A	#N/A		#N/A	#N/A	#N/A
DIRC2	#N/A	#N/A	#N/A		#N/A	#N/A	#N/A
DISP1	#N/A	#N/A	#N/A		#N/A	#N/A	#N/A
DISP2	#N/A	#N/A	#N/A		#N/A	#N/A	#N/A
DISP3	#N/A	#N/A	#N/A		#N/A	#N/A	#N/A
DLK1	#N/A	#N/A	#N/A		#N/A	#N/A	#N/A
DLK2	#N/A	#N/A	#N/A		#N/A	#N/A	#N/A
DLL1	#N/A	#N/A	#N/A		#N/A	#N/A	#N/A
DLL3	#N/A	#N/A	#N/A		#N/A	#N/A	#N/A
DLL4	#N/A	Dll4	Dll4		#N/A	#N/A	#N/A
DMAC1	#N/A	#N/A	#N/A		#N/A	#N/A	#N/A
DMPK	#N/A	#N/A	#N/A		Dmpk	Dmpk	Dmpk
DMRT2	#N/A	#N/A	#N/A		#N/A	#N/A	#N/A
DMXL2	#N/A	#N/A	#N/A		#N/A	#N/A	#N/A
DNAH2	#N/A	#N/A	#N/A		#N/A	#N/A	#N/A
DNAJB12	#N/A	#N/A	#N/A		#N/A	#N/A	#N/A
DNAJB14	#N/A	#N/A	#N/A		Dnajb14	Dnajb14	Dnajb14
DNAJC1	#N/A	#N/A	#N/A		#N/A	#N/A	#N/A
DNAJC10	#N/A	#N/A	#N/A		#N/A	#N/A	Dnajc10
DNAJC11	#N/A	#N/A	#N/A		#N/A	#N/A	#N/A
DNAJC13	#N/A	#N/A	#N/A		#N/A	#N/A	#N/A
DNAJC14	#N/A	#N/A	#N/A		#N/A	#N/A	#N/A
DNAJC15	#N/A	#N/A	#N/A		#N/A	#N/A	#N/A
DNAJC16	#N/A	#N/A	#N/A		#N/A	#N/A	#N/A
DNAJC18	#N/A	#N/A	#N/A		#N/A	#N/A	#N/A
DNAJC22	#N/A	#N/A	#N/A		#N/A	#N/A	#N/A
DNAJC25	#N/A	#N/A	#N/A		#N/A	#N/A	#N/A
DNAJC30	#N/A	#N/A	#N/A		#N/A	#N/A	#N/A
DNAJC4	#N/A	#N/A	#N/A		#N/A	#N/A	#N/A
DNAJC5	#N/A	#N/A	#N/A		#N/A	#N/A	#N/A
DNAJC5B	#N/A	#N/A	#N/A		#N/A	#N/A	#N/A
DNAJC5G	#N/A	#N/A	#N/A		#N/A	#N/A	#N/A
DNER	#N/A	#N/A	#N/A		#N/A	#N/A	Dner
DNPEP	#N/A	#N/A	#N/A		#N/A	#N/A	#N/A
DOK7	Dok7	Dok7	Dok7		#N/A	#N/A	#N/A
DOLK	#N/A	#N/A	#N/A		#N/A	#N/A	#N/A
DOLPP1	#N/A	#N/A	#N/A		#N/A	#N/A	#N/A
DONSON	#N/A	#N/A	#N/A		#N/A	#N/A	#N/A
DOPEY1	#N/A	#N/A	#N/A		#N/A	#N/A	#N/A
DPAGT1	#N/A	#N/A	#N/A		#N/A	#N/A	#N/A
DPCR1	#N/A	#N/A	#N/A		#N/A	#N/A	#N/A
DPEP2	#N/A	#N/A	#N/A		#N/A	#N/A	#N/A
DPM2	#N/A	#N/A	#N/A		#N/A	#N/A	#N/A
DPM3	#N/A	#N/A	#N/A		#N/A	#N/A	#N/A
DPP10	#N/A	#N/A	#N/A		#N/A	#N/A	#N/A
DPP4	#N/A	#N/A	#N/A		Dpp4	Dpp4	Dpp4
DPP6	#N/A	#N/A	#N/A		Dpp6	Dpp6	Dpp6
DPY19L1	#N/A	#N/A	#N/A		#N/A	#N/A	#N/A
DPY19L2	#N/A	#N/A	#N/A		#N/A	#N/A	#N/A
DPY19L3	#N/A	#N/A	#N/A		#N/A	#N/A	#N/A
DPY19L4	#N/A	#N/A	#N/A		#N/A	#N/A	#N/A
DRAM1	Dram1	Dram1	Dram1		#N/A	#N/A	#N/A
DRAM2	Dram2	Dram2	Dram2		#N/A	#N/A	#N/A
DRD1	#N/A	#N/A	#N/A		#N/A	#N/A	#N/A
DRD2	#N/A	#N/A	#N/A		#N/A	#N/A	#N/A
DRD3	#N/A	#N/A	#N/A		#N/A	#N/A	#N/A
DRD4	#N/A	#N/A	#N/A		#N/A	#N/A	#N/A
DRD5	#N/A	#N/A	#N/A		#N/A	#N/A	#N/A
DSC1	#N/A	#N/A	#N/A		#N/A	Dsc1	#N/A
DSC2	#N/A	#N/A	#N/A		#N/A	#N/A	#N/A
DSC3	Dsc3	Dsc3	Dsc3		#N/A	#N/A	#N/A
DSCAM	#N/A	#N/A	#N/A		#N/A	#N/A	#N/A
DSCAML1	#N/A	#N/A	#N/A		#N/A	#N/A	#N/A
DSE	#N/A	#N/A	#N/A		#N/A	#N/A	#N/A
DSEL	#N/A	#N/A	#N/A		#N/A	#N/A	#N/A
DSG1	#N/A	#N/A	#N/A		#N/A	#N/A	#N/A
DSG2	#N/A	#N/A	#N/A		#N/A	#N/A	#N/A
DSG3	#N/A	#N/A	#N/A		#N/A	#N/A	#N/A
DSG4	#N/A	#N/A	#N/A		#N/A	#N/A	#N/A
DTNA	#N/A	#N/A	#N/A		#N/A	#N/A	#N/A
DUOX1	#N/A	#N/A	#N/A		#N/A	#N/A	#N/A
DUOX2	#N/A	Duox2	Duox2		#N/A	#N/A	#N/A
DUOXA1	#N/A	#N/A	#N/A		#N/A	#N/A	#N/A
DUOXA2	#N/A	Duoxa2	Duoxa2		#N/A	#N/A	#N/A
DUSP13	#N/A	#N/A	#N/A		#N/A	#N/A	#N/A
DWORF	#N/A	#N/A	#N/A		#N/A	#N/A	#N/A
DYM	#N/A	#N/A	#N/A		#N/A	#N/A	#N/A
DYNAP	#N/A	#N/A	#N/A		#N/A	#N/A	#N/A
DYRK2	#N/A	#N/A	#N/A		#N/A	#N/A	#N/A
DYSF	#N/A	#N/A	#N/A		#N/A	#N/A	#N/A
DZIP3	#N/A	#N/A	#N/A		#N/A	#N/A	#N/A
E2F5	#N/A	#N/A	#N/A		#N/A	#N/A	#N/A
EBLN1	#N/A	#N/A	#N/A		#N/A	#N/A	#N/A
EBP	#N/A	#N/A	#N/A		#N/A	#N/A	#N/A
EBPL	#N/A	#N/A	#N/A		#N/A	#N/A	#N/A
ECE1	#N/A	Ece1	Ece1		#N/A	#N/A	#N/A
ECE2	#N/A	#N/A	#N/A		#N/A	#N/A	#N/A
ECEL1	#N/A	#N/A	#N/A		#N/A	#N/A	#N/A
ECSCR	#N/A	#N/A	Ecscr		#N/A	#N/A	#N/A
EDA	#N/A	#N/A	#N/A		#N/A	#N/A	#N/A
EDA2R	#N/A	#N/A	#N/A		#N/A	#N/A	#N/A
EDAR	#N/A	#N/A	#N/A		#N/A	#N/A	#N/A
EDNRA	#N/A	#N/A	#N/A		#N/A	#N/A	#N/A
EDNRB	#N/A	#N/A	#N/A		#N/A	#N/A	#N/A
EDRF1	#N/A	#N/A	#N/A		#N/A	#N/A	#N/A
EEF1AKMT4-ECE2	#N/A	#N/A	#N/A		#N/A	#N/A	#N/A
EEF1E1	#N/A	#N/A	#N/A		#N/A	#N/A	#N/A
EFCAB14	#N/A	#N/A	#N/A		#N/A	#N/A	#N/A
EFNA3	Efna3	Efna3	Efna3		#N/A	#N/A	#N/A
EFNA4	Efna4	Efna4	Efna4		#N/A	#N/A	#N/A
EFNA5	#N/A	#N/A	#N/A		#N/A	#N/A	#N/A
EFNB1	Efnb1	Efnb1	Efnb1		#N/A	#N/A	#N/A
EFNB2	#N/A	Efnb2	#N/A		#N/A	#N/A	#N/A
EFNB3	#N/A	#N/A	#N/A		#N/A	#N/A	#N/A
EGF	#N/A	#N/A	#N/A		Egf	Egf	Egf
EGFR	#N/A	#N/A	#N/A		#N/A	#N/A	#N/A
EI24	#N/A	#N/A	#N/A		#N/A	#N/A	#N/A
EIF2AK3	#N/A	#N/A	#N/A		#N/A	#N/A	#N/A
EIF3L	#N/A	#N/A	#N/A		#N/A	#N/A	#N/A
ELFN1	#N/A	#N/A	#N/A		#N/A	#N/A	#N/A
ELFN2	#N/A	#N/A	#N/A		#N/A	#N/A	#N/A
ELMOD1	#N/A	#N/A	#N/A		#N/A	#N/A	#N/A
ELOVL1	#N/A	#N/A	#N/A		#N/A	#N/A	#N/A
ELOVL2	#N/A	#N/A	#N/A		#N/A	#N/A	#N/A
ELOVL3	#N/A	#N/A	#N/A		#N/A	#N/A	#N/A
ELOVL4	#N/A	#N/A	#N/A		#N/A	#N/A	#N/A
ELOVL5	#N/A	#N/A	#N/A		#N/A	#N/A	#N/A
ELOVL6	#N/A	#N/A	#N/A		#N/A	#N/A	#N/A
ELOVL7	#N/A	#N/A	#N/A		#N/A	#N/A	#N/A
ELP6	#N/A	#N/A	#N/A		#N/A	#N/A	#N/A
EMB	#N/A	#N/A	#N/A		#N/A	#N/A	#N/A
EMC1	#N/A	#N/A	#N/A		#N/A	#N/A	#N/A
EMC10	#N/A	#N/A	#N/A		#N/A	#N/A	#N/A
EMC3	#N/A	#N/A	#N/A		#N/A	#N/A	#N/A
EMC4	#N/A	#N/A	#N/A		#N/A	#N/A	#N/A
EMC6	#N/A	#N/A	#N/A		#N/A	#N/A	#N/A
EMC7	#N/A	#N/A	#N/A		#N/A	#N/A	#N/A
EMCN	#N/A	#N/A	#N/A		#N/A	#N/A	#N/A
EMD	#N/A	#N/A	#N/A		#N/A	#N/A	#N/A
EMP1	#N/A	#N/A	#N/A		#N/A	#N/A	#N/A
EMP2	Emp2	Emp2	Emp2		#N/A	#N/A	#N/A
EMP3	#N/A	#N/A	#N/A		#N/A	#N/A	#N/A
ENDOD1	#N/A	#N/A	#N/A		#N/A	#N/A	#N/A
ENG	#N/A	#N/A	#N/A		#N/A	#N/A	#N/A
ENPEP	#N/A	#N/A	#N/A		#N/A	#N/A	#N/A
ENPP1	#N/A	#N/A	#N/A		#N/A	#N/A	#N/A
ENPP2	#N/A	#N/A	#N/A		#N/A	#N/A	#N/A
ENPP4	#N/A	#N/A	#N/A		#N/A	#N/A	#N/A
ENPP5	#N/A	#N/A	#N/A		#N/A	#N/A	#N/A
ENTPD1	#N/A	#N/A	#N/A		#N/A	#N/A	#N/A
ENTPD2	#N/A	#N/A	#N/A		#N/A	#N/A	#N/A
ENTPD3	#N/A	#N/A	#N/A		#N/A	#N/A	Entpd3
ENTPD4	#N/A	#N/A	#N/A		#N/A	#N/A	#N/A
ENTPD6	#N/A	#N/A	#N/A		#N/A	#N/A	#N/A
ENTPD7	#N/A	#N/A	#N/A		#N/A	#N/A	#N/A
ENTPD8	#N/A	#N/A	#N/A		#N/A	#N/A	#N/A
EOGT	#N/A	#N/A	#N/A		#N/A	#N/A	#N/A
EPB41	#N/A	#N/A	#N/A		#N/A	#N/A	#N/A
EPB41L2	#N/A	#N/A	#N/A		#N/A	#N/A	#N/A
EPB41L3	#N/A	#N/A	#N/A		#N/A	#N/A	#N/A
EPCAM	#N/A	#N/A	#N/A		#N/A	#N/A	#N/A
EPGN	#N/A	#N/A	#N/A		#N/A	#N/A	#N/A
EPHA1	#N/A	#N/A	#N/A		#N/A	#N/A	#N/A
EPHA10	#N/A	#N/A	#N/A		#N/A	#N/A	#N/A
EPHA2	Epha2	Epha2	Epha2		#N/A	#N/A	#N/A
EPHA3	#N/A	#N/A	#N/A		#N/A	Epha3	#N/A
EPHA4	Epha4	Epha4	Epha4		#N/A	#N/A	#N/A
EPHA5	#N/A	#N/A	#N/A		#N/A	#N/A	#N/A
EPHA6	#N/A	#N/A	#N/A		#N/A	#N/A	#N/A
EPHA7	#N/A	#N/A	#N/A		#N/A	#N/A	#N/A
EPHA8	#N/A	#N/A	#N/A		#N/A	#N/A	#N/A
EPHB1	#N/A	#N/A	#N/A		#N/A	#N/A	#N/A
EPHB2	Ephb2	Ephb2	Ephb2		#N/A	#N/A	#N/A
EPHB3	Ephb3	Ephb3	Ephb3		#N/A	#N/A	#N/A
EPHB4	#N/A	#N/A	#N/A		#N/A	#N/A	#N/A
EPHB6	Ephb6	Ephb6	Ephb6		#N/A	#N/A	#N/A
EPOR	#N/A	#N/A	#N/A		#N/A	#N/A	#N/A
EPSTI1	Epsti1	Epsti1	Epsti1		#N/A	#N/A	#N/A
EQTN	#N/A	#N/A	#N/A		#N/A	#N/A	#N/A
ERBB2	#N/A	#N/A	#N/A		#N/A	#N/A	#N/A
ERBB3	#N/A	#N/A	#N/A		#N/A	#N/A	#N/A
ERBB4	#N/A	#N/A	#N/A		#N/A	#N/A	#N/A
EREG	#N/A	#N/A	#N/A		#N/A	#N/A	#N/A
ERG28	#N/A	#N/A	#N/A		#N/A	#N/A	#N/A
ERGIC1	#N/A	#N/A	#N/A		#N/A	#N/A	#N/A
ERGIC2	#N/A	#N/A	#N/A		#N/A	#N/A	#N/A
ERGIC3	#N/A	#N/A	#N/A		#N/A	#N/A	#N/A
ERMAP	#N/A	#N/A	#N/A		#N/A	#N/A	#N/A
ERMARD	#N/A	#N/A	#N/A		#N/A	#N/A	#N/A
ERMP1	Ermp1	Ermp1	Ermp1		#N/A	#N/A	#N/A
ERN1	#N/A	#N/A	#N/A		Ern1	Ern1	Ern1
ERN2	Ern2	Ern2	Ern2		#N/A	#N/A	#N/A
ERVFRD-1	#N/A	#N/A	#N/A		#N/A	#N/A	#N/A
ERVMER34-1	#N/A	#N/A	#N/A		#N/A	#N/A	#N/A
ERVV-1	#N/A	#N/A	#N/A		#N/A	#N/A	#N/A
ERVV-2	#N/A	#N/A	#N/A		#N/A	#N/A	#N/A
ERVW-1	#N/A	#N/A	#N/A		#N/A	#N/A	#N/A
ESAM	#N/A	#N/A	#N/A		#N/A	#N/A	#N/A
ESPL1	Espl1	Espl1	Espl1		#N/A	#N/A	#N/A
ESYT1	#N/A	#N/A	#N/A		#N/A	#N/A	#N/A
ESYT2	#N/A	#N/A	#N/A		#N/A	#N/A	#N/A
ESYT3	#N/A	#N/A	#N/A		#N/A	#N/A	#N/A
ETFDH	#N/A	#N/A	#N/A		#N/A	#N/A	#N/A
ETNK1	#N/A	#N/A	#N/A		#N/A	#N/A	#N/A
EVA1A	Eva1a	Eva1a	Eva1a		#N/A	#N/A	#N/A
EVA1C	#N/A	#N/A	#N/A		#N/A	#N/A	#N/A
EVC	#N/A	#N/A	#N/A		#N/A	#N/A	#N/A
EVC2	#N/A	#N/A	#N/A		#N/A	#N/A	#N/A
EVI2A	#N/A	#N/A	#N/A		#N/A	#N/A	#N/A
EVI2B	#N/A	#N/A	#N/A		#N/A	#N/A	#N/A
EVI5	#N/A	#N/A	#N/A		#N/A	#N/A	#N/A
EVI5L	#N/A	#N/A	#N/A		#N/A	#N/A	#N/A
EXD2	#N/A	#N/A	#N/A		#N/A	#N/A	#N/A
EXT1	#N/A	#N/A	#N/A		#N/A	#N/A	#N/A
EXT2	#N/A	#N/A	#N/A		#N/A	#N/A	#N/A
EXTL3	#N/A	#N/A	#N/A		#N/A	#N/A	#N/A
F11R	#N/A	#N/A	#N/A		#N/A	#N/A	#N/A
F2R	#N/A	#N/A	#N/A		#N/A	#N/A	#N/A
F2RL1	F2rl1	F2rl1	F2rl1		#N/A	#N/A	#N/A
F2RL2	#N/A	#N/A	#N/A		#N/A	#N/A	#N/A
F2RL3	#N/A	#N/A	#N/A		#N/A	#N/A	#N/A
F3	F3	F3	F3		#N/A	#N/A	#N/A
FA2H	Fa2h	Fa2h	Fa2h		#N/A	#N/A	#N/A
FAAH	#N/A	#N/A	#N/A		#N/A	#N/A	#N/A
FADS1	#N/A	#N/A	#N/A		#N/A	#N/A	#N/A
FADS2	#N/A	#N/A	#N/A		#N/A	#N/A	#N/A
FADS3	#N/A	#N/A	#N/A		#N/A	#N/A	#N/A
FADS6	Fads6	Fads6	#N/A		#N/A	#N/A	#N/A
FAF2	#N/A	#N/A	#N/A		#N/A	#N/A	#N/A
FAIM2	#N/A	#N/A	Faim2		#N/A	#N/A	#N/A
FAM105A	#N/A	#N/A	Fam105a		#N/A	#N/A	#N/A
FAM122C	#N/A	#N/A	#N/A		#N/A	#N/A	#N/A
FAM155A	#N/A	#N/A	#N/A		#N/A	#N/A	#N/A
FAM155B	#N/A	#N/A	#N/A		#N/A	#N/A	#N/A
FAM160A2	#N/A	#N/A	#N/A		#N/A	#N/A	#N/A
FAM162A	#N/A	#N/A	#N/A		#N/A	#N/A	#N/A
FAM162B	#N/A	#N/A	#N/A		#N/A	#N/A	#N/A
FAM163A	#N/A	#N/A	#N/A		#N/A	#N/A	#N/A
FAM163B	#N/A	#N/A	#N/A		#N/A	#N/A	#N/A
FAM171A1	#N/A	#N/A	#N/A		#N/A	#N/A	#N/A
FAM171A2	#N/A	#N/A	#N/A		#N/A	#N/A	#N/A
FAM171B	#N/A	#N/A	#N/A		Fam171b	Fam171b	#N/A
FAM173A	#N/A	#N/A	#N/A		#N/A	#N/A	#N/A
FAM173B	#N/A	#N/A	#N/A		#N/A	#N/A	#N/A
FAM174A	#N/A	#N/A	#N/A		#N/A	#N/A	#N/A
FAM174B	#N/A	#N/A	#N/A		#N/A	#N/A	#N/A
FAM187A	#N/A	#N/A	#N/A		#N/A	#N/A	#N/A
FAM187B	#N/A	#N/A	#N/A		#N/A	#N/A	#N/A
FAM189A1	#N/A	#N/A	#N/A		Fam189a1	Fam189a1	Fam189a1
FAM189A2	#N/A	#N/A	#N/A		#N/A	#N/A	#N/A
FAM189B	#N/A	#N/A	#N/A		#N/A	#N/A	#N/A
FAM198B	#N/A	#N/A	#N/A		#N/A	#N/A	#N/A
FAM205A	#N/A	#N/A	#N/A		#N/A	#N/A	#N/A
FAM205C	#N/A	#N/A	#N/A		#N/A	#N/A	#N/A
FAM209A	#N/A	#N/A	#N/A		#N/A	#N/A	#N/A
FAM209B	#N/A	#N/A	#N/A		#N/A	#N/A	#N/A
FAM210A	#N/A	#N/A	#N/A		Fam210a	Fam210a	Fam210a
FAM210B	#N/A	#N/A	#N/A		#N/A	#N/A	#N/A
FAM213A	#N/A	#N/A	Fam213a		#N/A	#N/A	#N/A
FAM220A	#N/A	#N/A	#N/A		#N/A	#N/A	#N/A
FAM234A	#N/A	#N/A	#N/A		#N/A	#N/A	#N/A
FAM234B	#N/A	#N/A	#N/A		#N/A	#N/A	#N/A
FAM241A	#N/A	#N/A	#N/A		#N/A	#N/A	#N/A
FAM241B	#N/A	#N/A	#N/A		#N/A	#N/A	#N/A
FAM35A	#N/A	#N/A	#N/A		#N/A	#N/A	#N/A
FAM3A	#N/A	#N/A	#N/A		#N/A	#N/A	#N/A
FAM3B	Fam3b	Fam3b	Fam3b		#N/A	#N/A	#N/A
FAM3D	#N/A	#N/A	#N/A		#N/A	#N/A	#N/A
FAM57A	Fam57a	Fam57a	Fam57a		#N/A	#N/A	#N/A
FAM57B	#N/A	#N/A	#N/A		#N/A	#N/A	#N/A
FAM69A	Fam69a	#N/A	#N/A		#N/A	#N/A	#N/A
FAM69B	#N/A	#N/A	#N/A		#N/A	#N/A	#N/A
FAM76B	#N/A	#N/A	#N/A		#N/A	#N/A	#N/A
FAM8A1	#N/A	#N/A	#N/A		#N/A	#N/A	#N/A
FAM98B	#N/A	#N/A	#N/A		#N/A	#N/A	#N/A
FAM9C	#N/A	#N/A	#N/A		#N/A	#N/A	#N/A
FANCA	#N/A	#N/A	#N/A		#N/A	#N/A	#N/A
FAR1	#N/A	#N/A	#N/A		#N/A	#N/A	#N/A
FAR2	#N/A	#N/A	#N/A		#N/A	#N/A	#N/A
FAS	#N/A	#N/A	#N/A		#N/A	#N/A	#N/A
FASLG	#N/A	#N/A	#N/A		#N/A	#N/A	#N/A
FAT1	#N/A	Fat1	Fat1		#N/A	#N/A	#N/A
FAT2	Fat2	Fat2	Fat2		#N/A	#N/A	#N/A
FAT3	#N/A	#N/A	#N/A		#N/A	#N/A	#N/A
FAT4	#N/A	#N/A	#N/A		#N/A	#N/A	#N/A
FATE1	#N/A	#N/A	#N/A		#N/A	#N/A	#N/A
FAXDC2	#N/A	#N/A	#N/A		#N/A	#N/A	#N/A
FBXL17	#N/A	#N/A	#N/A		#N/A	#N/A	#N/A
FBXO18	#N/A	#N/A	#N/A		#N/A	#N/A	#N/A
FBXO31	#N/A	#N/A	#N/A		#N/A	#N/A	#N/A
FBXW12	#N/A	#N/A	#N/A		#N/A	#N/A	#N/A
FCAMR	Fcamr	Fcamr	Fcamr		#N/A	#N/A	#N/A
FCAR	#N/A	#N/A	#N/A		#N/A	#N/A	#N/A
FCER1A	#N/A	#N/A	#N/A		#N/A	#N/A	#N/A
FCER1G	#N/A	#N/A	Fcer1g		#N/A	#N/A	#N/A
FCER2	#N/A	#N/A	#N/A		#N/A	#N/A	#N/A
FCGR1A	#N/A	#N/A	#N/A		#N/A	#N/A	#N/A
FCGR1B	#N/A	#N/A	#N/A		#N/A	#N/A	#N/A
FCGR2A	#N/A	#N/A	#N/A		#N/A	#N/A	#N/A
FCGR2B	#N/A	#N/A	#N/A		#N/A	#N/A	#N/A
FCGR3A	#N/A	#N/A	#N/A		#N/A	#N/A	#N/A
FCGR3B	#N/A	#N/A	#N/A		#N/A	#N/A	#N/A
FCGRT	#N/A	#N/A	Fcgrt		#N/A	#N/A	#N/A
FCMR	#N/A	#N/A	#N/A		#N/A	#N/A	#N/A
FCN1	#N/A	#N/A	#N/A		#N/A	#N/A	#N/A
FCRL1	#N/A	#N/A	#N/A		#N/A	#N/A	#N/A
FCRL2	#N/A	#N/A	#N/A		#N/A	#N/A	#N/A
FCRL3	#N/A	#N/A	#N/A		#N/A	#N/A	#N/A
FCRL4	#N/A	#N/A	#N/A		#N/A	#N/A	#N/A
FCRL5	#N/A	#N/A	#N/A		#N/A	#N/A	#N/A
FCRL6	#N/A	#N/A	#N/A		#N/A	#N/A	#N/A
FCRLA	#N/A	#N/A	#N/A		#N/A	#N/A	#N/A
FDFT1	#N/A	#N/A	#N/A		#N/A	#N/A	#N/A
FER1L5	#N/A	#N/A	#N/A		#N/A	#N/A	#N/A
FER1L6	#N/A	#N/A	#N/A		#N/A	#N/A	#N/A
FFAR1	#N/A	#N/A	#N/A		#N/A	#N/A	#N/A
FFAR2	#N/A	#N/A	#N/A		#N/A	#N/A	#N/A
FFAR3	#N/A	#N/A	#N/A		#N/A	#N/A	#N/A
FFAR4	Ffar4	Ffar4	Ffar4		#N/A	#N/A	#N/A
FGFR1	#N/A	#N/A	#N/A		#N/A	#N/A	#N/A
FGFR2	#N/A	#N/A	#N/A		#N/A	#N/A	#N/A
FGFR3	Fgfr3	Fgfr3	Fgfr3		#N/A	#N/A	#N/A
FGFR4	#N/A	#N/A	#N/A		#N/A	#N/A	#N/A
FGFRL1	#N/A	#N/A	#N/A		#N/A	#N/A	#N/A
FIG4	#N/A	#N/A	#N/A		#N/A	#N/A	#N/A
FIS1	#N/A	#N/A	#N/A		#N/A	#N/A	#N/A
FITM1	#N/A	#N/A	#N/A		#N/A	#N/A	#N/A
FITM2	#N/A	#N/A	#N/A		#N/A	#N/A	#N/A
FKBP11	#N/A	#N/A	#N/A		Fkbp11	Fkbp11	Fkbp11
FKBP1A	#N/A	#N/A	#N/A		#N/A	#N/A	#N/A
FKBP8	#N/A	#N/A	#N/A		#N/A	#N/A	#N/A
FKRP	#N/A	#N/A	#N/A		#N/A	#N/A	#N/A
FLRT1	#N/A	#N/A	#N/A		#N/A	#N/A	#N/A
FLRT2	#N/A	#N/A	#N/A		Flrt2	Flrt2	#N/A
FLRT3	#N/A	#N/A	#N/A		#N/A	#N/A	#N/A
FLT1	#N/A	#N/A	#N/A		#N/A	#N/A	#N/A
FLT3	#N/A	#N/A	#N/A		#N/A	#N/A	#N/A
FLT3LG	#N/A	#N/A	#N/A		#N/A	#N/A	#N/A
FLT4	#N/A	#N/A	#N/A		#N/A	#N/A	#N/A
FLVCR1	#N/A	#N/A	#N/A		#N/A	#N/A	#N/A
FLVCR2	#N/A	#N/A	#N/A		#N/A	#N/A	#N/A
FMNL1	#N/A	#N/A	Fmnl1		#N/A	#N/A	#N/A
FMO1	#N/A	#N/A	#N/A		#N/A	Fmo1	#N/A
FMO2	#N/A	#N/A	#N/A		#N/A	#N/A	#N/A
FMO3	Fmo3	Fmo3	#N/A		#N/A	#N/A	#N/A
FMO4	#N/A	#N/A	#N/A		#N/A	#N/A	#N/A
FMO5	#N/A	#N/A	#N/A		#N/A	#N/A	#N/A
FMR1NB	#N/A	#N/A	#N/A		#N/A	#N/A	#N/A
FNDC10	#N/A	#N/A	#N/A		#N/A	#N/A	#N/A
FNDC3A	#N/A	#N/A	#N/A		#N/A	#N/A	#N/A
FNDC3B	#N/A	#N/A	#N/A		#N/A	#N/A	#N/A
FNDC4	#N/A	#N/A	#N/A		#N/A	#N/A	#N/A
FNDC5	Fndc5	Fndc5	Fndc5		#N/A	#N/A	#N/A
FNDC9	#N/A	#N/A	#N/A		#N/A	#N/A	#N/A
FO681492.1	#N/A	#N/A	#N/A		#N/A	#N/A	#N/A
FOCAD	#N/A	#N/A	#N/A		#N/A	#N/A	#N/A
FOLH1	#N/A	#N/A	#N/A		#N/A	#N/A	#N/A
FOLR1	#N/A	#N/A	#N/A		#N/A	Folr1	Folr1
FOLR2	#N/A	#N/A	#N/A		Folr2	Folr2	#N/A
FP565260.3	#N/A	#N/A	#N/A		#N/A	#N/A	#N/A
FPR1	#N/A	#N/A	#N/A		#N/A	#N/A	#N/A
FPR2	#N/A	#N/A	Fpr2		#N/A	#N/A	#N/A
FPR3	#N/A	#N/A	#N/A		#N/A	#N/A	#N/A
FRAS1	Fras1	Fras1	Fras1		#N/A	#N/A	#N/A
FREM2	Frem2	Frem2	Frem2		#N/A	#N/A	#N/A
FRMD3	#N/A	#N/A	#N/A		#N/A	#N/A	#N/A
FRMD5	#N/A	#N/A	#N/A		#N/A	#N/A	#N/A
FRRS1	#N/A	#N/A	#N/A		#N/A	#N/A	#N/A
FRRS1L	#N/A	#N/A	#N/A		#N/A	#N/A	#N/A
FSD1L	Fsd1l	Fsd1l	Fsd1l		#N/A	#N/A	#N/A
FSHR	#N/A	#N/A	#N/A		#N/A	#N/A	#N/A
FURIN	#N/A	#N/A	#N/A		#N/A	#N/A	#N/A
FUT1	#N/A	#N/A	#N/A		#N/A	#N/A	#N/A
FUT2	#N/A	#N/A	#N/A		#N/A	#N/A	#N/A
FUT3	#N/A	#N/A	#N/A		#N/A	#N/A	#N/A
FUT4	Fut4	Fut4	Fut4		#N/A	#N/A	#N/A
FUT5	#N/A	#N/A	#N/A		#N/A	#N/A	#N/A
FUT6	#N/A	#N/A	#N/A		#N/A	#N/A	#N/A
FUT8	#N/A	#N/A	#N/A		#N/A	Fut8	Fut8
FUT9	#N/A	#N/A	#N/A		Fut9	Fut9	Fut9
FUZ	#N/A	#N/A	#N/A		#N/A	#N/A	#N/A
FXYD1	#N/A	#N/A	#N/A		#N/A	#N/A	#N/A
FXYD2	#N/A	#N/A	#N/A		#N/A	#N/A	#N/A
FXYD3	Fxyd3	Fxyd3	Fxyd3		#N/A	#N/A	#N/A
FXYD4	#N/A	Fxyd4	Fxyd4		#N/A	#N/A	#N/A
FXYD5	#N/A	#N/A	#N/A		#N/A	#N/A	#N/A
FXYD6	Fxyd6	Fxyd6	Fxyd6		#N/A	#N/A	#N/A
FXYD6-FXYD2	#N/A	#N/A	#N/A		#N/A	#N/A	#N/A
FXYD7	#N/A	#N/A	#N/A		#N/A	#N/A	#N/A
FZD1	#N/A	#N/A	#N/A		#N/A	#N/A	#N/A
FZD10	#N/A	#N/A	#N/A		#N/A	#N/A	#N/A
FZD2	#N/A	#N/A	#N/A		#N/A	#N/A	#N/A
FZD3	#N/A	#N/A	#N/A		#N/A	#N/A	#N/A
FZD4	#N/A	#N/A	#N/A		#N/A	#N/A	#N/A
FZD5	#N/A	#N/A	#N/A		#N/A	#N/A	#N/A
FZD6	#N/A	#N/A	#N/A		#N/A	#N/A	#N/A
FZD7	#N/A	#N/A	#N/A		#N/A	#N/A	#N/A
FZD8	#N/A	#N/A	#N/A		#N/A	#N/A	#N/A
FZD9	#N/A	#N/A	#N/A		#N/A	#N/A	#N/A
G6PC	#N/A	#N/A	#N/A		#N/A	#N/A	#N/A
G6PC2	#N/A	#N/A	#N/A		#N/A	#N/A	#N/A
G6PC3	#N/A	#N/A	#N/A		#N/A	#N/A	#N/A
GABBR1	Gabbr1	Gabbr1	#N/A		#N/A	#N/A	#N/A
GABBR2	#N/A	#N/A	#N/A		#N/A	#N/A	#N/A
GABRA1	#N/A	#N/A	#N/A		#N/A	#N/A	#N/A
GABRA2	#N/A	#N/A	#N/A		#N/A	#N/A	#N/A
GABRA3	#N/A	#N/A	#N/A		#N/A	#N/A	#N/A
GABRA4	#N/A	#N/A	#N/A		#N/A	Gabra4	#N/A
GABRA5	#N/A	#N/A	#N/A		#N/A	#N/A	#N/A
GABRA6	#N/A	#N/A	#N/A		#N/A	#N/A	#N/A
GABRB1	#N/A	#N/A	#N/A		#N/A	#N/A	#N/A
GABRB2	#N/A	#N/A	#N/A		#N/A	#N/A	#N/A
GABRB3	#N/A	#N/A	#N/A		#N/A	#N/A	#N/A
GABRD	#N/A	#N/A	#N/A		#N/A	#N/A	#N/A
GABRE	Gabre	Gabre	Gabre		#N/A	#N/A	#N/A
GABRG1	#N/A	#N/A	#N/A		#N/A	#N/A	#N/A
GABRG2	#N/A	#N/A	#N/A		#N/A	#N/A	#N/A
GABRG3	#N/A	Gabrg3	Gabrg3		#N/A	#N/A	#N/A
GABRP	Gabrp	Gabrp	Gabrp		#N/A	#N/A	#N/A
GABRQ	#N/A	#N/A	#N/A		#N/A	#N/A	#N/A
GABRR1	#N/A	#N/A	#N/A		#N/A	#N/A	#N/A
GABRR2	#N/A	#N/A	#N/A		#N/A	#N/A	#N/A
GABRR3	#N/A	#N/A	#N/A		#N/A	#N/A	#N/A
GAL3ST4	#N/A	#N/A	#N/A		#N/A	#N/A	#N/A
GALC	#N/A	#N/A	#N/A		#N/A	#N/A	#N/A
GALNT1	#N/A	#N/A	#N/A		#N/A	#N/A	#N/A
GALNT11	#N/A	#N/A	#N/A		#N/A	#N/A	#N/A
GALNT14	Galnt14	Galnt14	Galnt14		#N/A	#N/A	#N/A
GALNT18	#N/A	#N/A	#N/A		#N/A	#N/A	#N/A
GALNT3	Galnt3	Galnt3	Galnt3		#N/A	#N/A	#N/A
GALNT8	#N/A	#N/A	#N/A		#N/A	#N/A	#N/A
GALNT9	#N/A	#N/A	#N/A		Galnt9	Galnt9	Galnt9
GALNTL5	#N/A	#N/A	#N/A		#N/A	#N/A	#N/A
GALR1	#N/A	#N/A	#N/A		#N/A	#N/A	#N/A
GALR2	#N/A	#N/A	#N/A		#N/A	#N/A	#N/A
GALR3	#N/A	#N/A	#N/A		#N/A	#N/A	#N/A
GCGR	#N/A	#N/A	#N/A		#N/A	#N/A	#N/A
GCNT2	#N/A	Gcnt2	Gcnt2		#N/A	#N/A	#N/A
GCNT3	Gcnt3	Gcnt3	Gcnt3		#N/A	#N/A	#N/A
GCSAML-AS1	#N/A	#N/A	#N/A		#N/A	#N/A	#N/A
GDAP1	#N/A	#N/A	#N/A		#N/A	#N/A	#N/A
GDAP1L1	Gdap1l1	Gdap1l1	#N/A		#N/A	#N/A	#N/A
GDE1	Gde1	Gde1	Gde1		#N/A	#N/A	#N/A
GDPD1	Gdpd1	Gdpd1	#N/A		#N/A	#N/A	#N/A
GDPD2	#N/A	#N/A	Gdpd2		#N/A	#N/A	#N/A
GDPD3	#N/A	#N/A	#N/A		#N/A	#N/A	Gdpd3
GDPD4	#N/A	#N/A	#N/A		#N/A	#N/A	#N/A
GDPD5	#N/A	#N/A	#N/A		#N/A	#N/A	#N/A
GFPT1	#N/A	#N/A	#N/A		#N/A	#N/A	#N/A
GFPT2	#N/A	#N/A	#N/A		#N/A	#N/A	#N/A
GFRA1	#N/A	Gfra1	Gfra1		#N/A	#N/A	#N/A
GFRA3	#N/A	#N/A	#N/A		Gfra3	Gfra3	Gfra3
GFRAL	#N/A	#N/A	#N/A		#N/A	#N/A	#N/A
GFY	#N/A	#N/A	#N/A		#N/A	#N/A	#N/A
GGCX	#N/A	#N/A	#N/A		#N/A	#N/A	#N/A
GGT1	#N/A	#N/A	#N/A		#N/A	Ggt1	Ggt1
GGT2	#N/A	#N/A	#N/A		#N/A	#N/A	#N/A
GGT6	Ggt6	Ggt6	Ggt6		#N/A	#N/A	#N/A
GGT7	#N/A	#N/A	#N/A		#N/A	#N/A	#N/A
GHITM	#N/A	#N/A	#N/A		#N/A	#N/A	#N/A
GHR	#N/A	#N/A	#N/A		#N/A	#N/A	#N/A
GHRHR	#N/A	#N/A	#N/A		#N/A	#N/A	#N/A
GHSR	#N/A	#N/A	#N/A		#N/A	#N/A	#N/A
GIMAP1	#N/A	#N/A	#N/A		#N/A	#N/A	#N/A
GIMAP1-GIMAP5	#N/A	#N/A	#N/A		#N/A	#N/A	#N/A
GIMAP2	#N/A	#N/A	#N/A		#N/A	#N/A	#N/A
GIMAP5	#N/A	#N/A	#N/A		#N/A	#N/A	#N/A
GINM1	#N/A	#N/A	#N/A		#N/A	#N/A	#N/A
GIPR	#N/A	#N/A	#N/A		#N/A	#N/A	#N/A
GJA1	#N/A	#N/A	#N/A		#N/A	#N/A	#N/A
GJA10	#N/A	#N/A	#N/A		#N/A	#N/A	#N/A
GJA3	#N/A	#N/A	#N/A		#N/A	#N/A	#N/A
GJA4	#N/A	#N/A	#N/A		#N/A	#N/A	#N/A
GJA5	#N/A	#N/A	#N/A		#N/A	#N/A	#N/A
GJA8	#N/A	#N/A	#N/A		#N/A	#N/A	#N/A
GJA9	#N/A	#N/A	#N/A		#N/A	#N/A	#N/A
GJB1	#N/A	#N/A	#N/A		#N/A	#N/A	#N/A
GJB2	#N/A	#N/A	#N/A		#N/A	#N/A	#N/A
GJB3	Gjb3	Gjb3	Gjb3		#N/A	#N/A	#N/A
GJB4	Gjb4	Gjb4	Gjb4		#N/A	#N/A	#N/A
GJB5	#N/A	#N/A	#N/A		#N/A	#N/A	#N/A
GJB6	Gjb6	Gjb6	Gjb6		#N/A	#N/A	#N/A
GJB7	#N/A	#N/A	#N/A		#N/A	#N/A	#N/A
GJC1	#N/A	#N/A	#N/A		#N/A	#N/A	#N/A
GJC2	#N/A	#N/A	#N/A		#N/A	Gjc2	#N/A
GJC3	#N/A	#N/A	#N/A		#N/A	#N/A	#N/A
GJD2	#N/A	#N/A	#N/A		#N/A	#N/A	#N/A
GJD3	#N/A	#N/A	#N/A		#N/A	#N/A	#N/A
GJD4	#N/A	#N/A	#N/A		#N/A	#N/A	#N/A
GJE1	#N/A	#N/A	#N/A		#N/A	#N/A	#N/A
GK	#N/A	#N/A	#N/A		#N/A	#N/A	#N/A
GK2	#N/A	#N/A	#N/A		#N/A	#N/A	#N/A
GK3P	#N/A	#N/A	#N/A		#N/A	#N/A	#N/A
GLCCI1	#N/A	#N/A	#N/A		#N/A	#N/A	#N/A
GLG1	#N/A	#N/A	#N/A		#N/A	#N/A	#N/A
GLIPR1	#N/A	#N/A	#N/A		#N/A	#N/A	#N/A
GLIPR1L2	#N/A	#N/A	#N/A		#N/A	#N/A	#N/A
GLMP	#N/A	#N/A	#N/A		#N/A	#N/A	#N/A
GLP1R	#N/A	#N/A	#N/A		#N/A	#N/A	#N/A
GLP2R	#N/A	#N/A	#N/A		#N/A	#N/A	#N/A
GLRA1	#N/A	#N/A	#N/A		#N/A	#N/A	#N/A
GLRA2	#N/A	#N/A	#N/A		#N/A	#N/A	#N/A
GLRA3	#N/A	#N/A	#N/A		#N/A	#N/A	#N/A
GLRA4	#N/A	#N/A	#N/A		#N/A	#N/A	#N/A
GLRB	#N/A	#N/A	#N/A		#N/A	#N/A	#N/A
GLT8D1	#N/A	#N/A	#N/A		#N/A	#N/A	#N/A
GNE	Gne	Gne	Gne		#N/A	#N/A	#N/A
GNPTAB	#N/A	#N/A	#N/A		#N/A	#N/A	#N/A
GNRHR	#N/A	#N/A	#N/A		#N/A	#N/A	#N/A
GOLGA5	#N/A	#N/A	#N/A		#N/A	#N/A	#N/A
GOLGB1	#N/A	#N/A	#N/A		#N/A	#N/A	#N/A
GOLIM4	#N/A	#N/A	#N/A		#N/A	#N/A	#N/A
GOLT1A	#N/A	#N/A	#N/A		Golt1a	Golt1a	Golt1a
GOLT1B	#N/A	#N/A	#N/A		#N/A	#N/A	#N/A
GOSR1	#N/A	#N/A	#N/A		#N/A	#N/A	#N/A
GOSR2	#N/A	#N/A	#N/A		#N/A	#N/A	#N/A
GP1BA	#N/A	#N/A	#N/A		#N/A	#N/A	#N/A
GP1BB	#N/A	#N/A	#N/A		#N/A	#N/A	#N/A
GP2	Gp2	Gp2	Gp2		#N/A	#N/A	#N/A
GP5	#N/A	#N/A	#N/A		#N/A	#N/A	#N/A
GP6	#N/A	#N/A	#N/A		#N/A	#N/A	#N/A
GP9	#N/A	#N/A	#N/A		#N/A	#N/A	#N/A
GPA33	Gpa33	Gpa33	Gpa33		#N/A	#N/A	#N/A
GPAA1	#N/A	#N/A	#N/A		#N/A	#N/A	#N/A
GPAM	#N/A	#N/A	#N/A		#N/A	#N/A	#N/A
GPAT2	#N/A	#N/A	#N/A		#N/A	#N/A	#N/A
GPAT3	#N/A	#N/A	#N/A		#N/A	#N/A	#N/A
GPAT4	#N/A	#N/A	#N/A		#N/A	#N/A	#N/A
GPBAR1	#N/A	#N/A	#N/A		#N/A	#N/A	#N/A
GPC1	#N/A	#N/A	#N/A		#N/A	#N/A	#N/A
GPC3	#N/A	#N/A	#N/A		#N/A	#N/A	#N/A
GPC4	#N/A	Gpc4	Gpc4		#N/A	#N/A	#N/A
GPER1	#N/A	#N/A	#N/A		#N/A	#N/A	#N/A
GPI	#N/A	#N/A	#N/A		#N/A	#N/A	#N/A
GPM6A	#N/A	#N/A	#N/A		#N/A	#N/A	#N/A
GPM6B	#N/A	#N/A	#N/A		#N/A	#N/A	#N/A
GPNMB	#N/A	#N/A	#N/A		#N/A	#N/A	#N/A
GPR1	#N/A	#N/A	#N/A		#N/A	#N/A	#N/A
GPR101	#N/A	#N/A	#N/A		#N/A	#N/A	#N/A
GPR107	#N/A	#N/A	#N/A		#N/A	#N/A	#N/A
GPR108	#N/A	#N/A	#N/A		#N/A	#N/A	#N/A
GPR119	#N/A	#N/A	#N/A		#N/A	#N/A	#N/A
GPR12	#N/A	#N/A	#N/A		#N/A	#N/A	#N/A
GPR132	#N/A	#N/A	#N/A		#N/A	#N/A	#N/A
GPR135	#N/A	#N/A	#N/A		#N/A	#N/A	#N/A
GPR137	#N/A	#N/A	#N/A		#N/A	#N/A	#N/A
GPR137B	Gpr137b	Gpr137b	Gpr137b		#N/A	#N/A	#N/A
GPR137C	#N/A	#N/A	#N/A		#N/A	#N/A	#N/A
GPR139	#N/A	#N/A	#N/A		#N/A	#N/A	#N/A
GPR141	#N/A	#N/A	Gpr141		#N/A	#N/A	#N/A
GPR142	#N/A	#N/A	#N/A		#N/A	#N/A	#N/A
GPR143	#N/A	#N/A	#N/A		#N/A	#N/A	#N/A
GPR146	#N/A	#N/A	#N/A		#N/A	#N/A	#N/A
GPR148	#N/A	#N/A	#N/A		#N/A	#N/A	#N/A
GPR149	#N/A	#N/A	#N/A		#N/A	#N/A	#N/A
GPR15	#N/A	#N/A	#N/A		#N/A	#N/A	#N/A
GPR150	#N/A	#N/A	#N/A		#N/A	#N/A	#N/A
GPR151	#N/A	#N/A	#N/A		#N/A	#N/A	#N/A
GPR152	#N/A	#N/A	#N/A		#N/A	#N/A	#N/A
GPR153	#N/A	#N/A	#N/A		#N/A	#N/A	#N/A
GPR155	Gpr155	Gpr155	#N/A		#N/A	#N/A	#N/A
GPR156	#N/A	#N/A	#N/A		#N/A	#N/A	#N/A
GPR157	#N/A	#N/A	#N/A		#N/A	#N/A	#N/A
GPR158	#N/A	#N/A	#N/A		#N/A	#N/A	#N/A
GPR160	#N/A	#N/A	#N/A		#N/A	#N/A	#N/A
GPR161	#N/A	#N/A	#N/A		#N/A	#N/A	#N/A
GPR162	#N/A	#N/A	#N/A		#N/A	#N/A	#N/A
GPR17	#N/A	#N/A	#N/A		#N/A	#N/A	#N/A
GPR171	#N/A	#N/A	#N/A		#N/A	#N/A	#N/A
GPR173	#N/A	#N/A	#N/A		#N/A	#N/A	#N/A
GPR174	#N/A	#N/A	#N/A		#N/A	#N/A	#N/A
GPR176	#N/A	#N/A	Gpr176		#N/A	#N/A	#N/A
GPR179	#N/A	#N/A	#N/A		#N/A	#N/A	#N/A
GPR18	#N/A	#N/A	#N/A		#N/A	#N/A	#N/A
GPR180	#N/A	#N/A	#N/A		#N/A	#N/A	#N/A
GPR182	#N/A	#N/A	#N/A		#N/A	#N/A	#N/A
GPR183	#N/A	#N/A	Gpr183		#N/A	#N/A	#N/A
GPR19	#N/A	#N/A	#N/A		#N/A	#N/A	#N/A
GPR20	#N/A	#N/A	#N/A		#N/A	#N/A	#N/A
GPR21	#N/A	#N/A	#N/A		#N/A	#N/A	#N/A
GPR22	#N/A	#N/A	#N/A		#N/A	#N/A	#N/A
GPR25	#N/A	#N/A	#N/A		#N/A	#N/A	#N/A
GPR26	#N/A	#N/A	#N/A		#N/A	#N/A	#N/A
GPR27	#N/A	#N/A	#N/A		#N/A	#N/A	#N/A
GPR3	#N/A	#N/A	#N/A		#N/A	#N/A	#N/A
GPR31	#N/A	#N/A	#N/A		#N/A	#N/A	#N/A
GPR32	#N/A	#N/A	#N/A		#N/A	#N/A	#N/A
GPR33	#N/A	#N/A	#N/A		#N/A	#N/A	#N/A
GPR34	#N/A	#N/A	#N/A		#N/A	#N/A	#N/A
GPR35	#N/A	Gpr35	Gpr35		#N/A	#N/A	#N/A
GPR37	#N/A	#N/A	#N/A		#N/A	#N/A	#N/A
GPR37L1	#N/A	#N/A	#N/A		Gpr37l1	Gpr37l1	Gpr37l1
GPR39	#N/A	#N/A	#N/A		#N/A	#N/A	#N/A
GPR4	#N/A	#N/A	#N/A		#N/A	#N/A	#N/A
GPR42	#N/A	#N/A	#N/A		#N/A	#N/A	#N/A
GPR45	#N/A	#N/A	#N/A		#N/A	#N/A	#N/A
GPR50	#N/A	#N/A	#N/A		#N/A	#N/A	#N/A
GPR52	#N/A	#N/A	#N/A		#N/A	#N/A	#N/A
GPR55	#N/A	Gpr55	Gpr55		#N/A	#N/A	#N/A
GPR6	#N/A	#N/A	#N/A		#N/A	#N/A	#N/A
GPR61	#N/A	#N/A	#N/A		#N/A	#N/A	#N/A
GPR62	#N/A	#N/A	#N/A		#N/A	#N/A	#N/A
GPR63	#N/A	#N/A	#N/A		#N/A	#N/A	#N/A
GPR65	Gpr65	Gpr65	Gpr65		#N/A	#N/A	#N/A
GPR68	#N/A	#N/A	Gpr68		#N/A	#N/A	#N/A
GPR75	#N/A	#N/A	#N/A		#N/A	#N/A	#N/A
GPR78	#N/A	#N/A	#N/A		#N/A	#N/A	#N/A
GPR82	#N/A	#N/A	#N/A		#N/A	#N/A	#N/A
GPR83	Gpr83	Gpr83	Gpr83		#N/A	#N/A	#N/A
GPR84	#N/A	#N/A	#N/A		#N/A	#N/A	#N/A
GPR85	#N/A	#N/A	#N/A		#N/A	#N/A	#N/A
GPR87	Gpr87	Gpr87	Gpr87		#N/A	#N/A	#N/A
GPR88	#N/A	#N/A	#N/A		#N/A	#N/A	#N/A
GPR89A	#N/A	#N/A	#N/A		#N/A	#N/A	#N/A
GPR89B	#N/A	#N/A	#N/A		#N/A	#N/A	#N/A
GPRC5A	Gprc5a	Gprc5a	Gprc5a		#N/A	#N/A	#N/A
GPRC5B	#N/A	#N/A	#N/A		#N/A	#N/A	#N/A
GPRC5C	#N/A	#N/A	#N/A		#N/A	#N/A	#N/A
GPRC5D	#N/A	#N/A	#N/A		#N/A	#N/A	#N/A
GPRC6A	#N/A	#N/A	#N/A		#N/A	Gprc6a	#N/A
GPSM2	#N/A	#N/A	#N/A		#N/A	#N/A	#N/A
GRAMD1A	#N/A	#N/A	#N/A		#N/A	Gramd1a	#N/A
GRAMD1B	#N/A	#N/A	#N/A		#N/A	#N/A	#N/A
GRAMD1C	#N/A	#N/A	#N/A		#N/A	#N/A	#N/A
GRAMD2A	#N/A	#N/A	#N/A		#N/A	#N/A	#N/A
GRAMD2B	#N/A	#N/A	#N/A		#N/A	#N/A	#N/A
GRAMD4	#N/A	#N/A	#N/A		#N/A	#N/A	#N/A
GREB1	#N/A	#N/A	#N/A		Greb1	Greb1	Greb1
GRIA1	#N/A	#N/A	#N/A		#N/A	#N/A	#N/A
GRIA2	#N/A	#N/A	#N/A		#N/A	#N/A	#N/A
GRIA3	#N/A	#N/A	#N/A		#N/A	#N/A	#N/A
GRIA4	#N/A	#N/A	#N/A		#N/A	#N/A	#N/A
GRID1	#N/A	#N/A	#N/A		#N/A	#N/A	#N/A
GRID2	Grid2	Grid2	Grid2		#N/A	#N/A	#N/A
GRIK1	#N/A	#N/A	#N/A		#N/A	#N/A	#N/A
GRIK2	#N/A	#N/A	#N/A		#N/A	#N/A	#N/A
GRIK3	#N/A	#N/A	#N/A		#N/A	#N/A	#N/A
GRIK4	#N/A	#N/A	#N/A		#N/A	Grik4	#N/A
GRIK5	#N/A	#N/A	#N/A		#N/A	#N/A	#N/A
GRIN1	Grin1	Grin1	Grin1		#N/A	#N/A	#N/A
GRIN2A	#N/A	#N/A	#N/A		#N/A	#N/A	#N/A
GRIN2B	#N/A	#N/A	#N/A		#N/A	#N/A	#N/A
GRIN2C	#N/A	#N/A	#N/A		#N/A	#N/A	#N/A
GRIN2D	#N/A	#N/A	#N/A		Grin2d	Grin2d	Grin2d
GRIN3A	#N/A	#N/A	#N/A		#N/A	#N/A	#N/A
GRIN3B	#N/A	#N/A	#N/A		#N/A	#N/A	#N/A
GRINA	#N/A	#N/A	#N/A		#N/A	#N/A	#N/A
GRM1	#N/A	#N/A	#N/A		#N/A	#N/A	#N/A
GRM2	#N/A	#N/A	#N/A		#N/A	#N/A	#N/A
GRM3	#N/A	#N/A	#N/A		#N/A	#N/A	#N/A
GRM4	#N/A	#N/A	#N/A		#N/A	#N/A	#N/A
GRM5	#N/A	#N/A	#N/A		#N/A	#N/A	#N/A
GRM6	#N/A	#N/A	#N/A		#N/A	#N/A	#N/A
GRM7	#N/A	#N/A	#N/A		Grm7	#N/A	Grm7
GRM8	#N/A	#N/A	#N/A		#N/A	#N/A	#N/A
GRPR	#N/A	#N/A	#N/A		#N/A	#N/A	#N/A
GSG1	#N/A	#N/A	#N/A		#N/A	#N/A	#N/A
GSG1L	#N/A	Gsg1l	Gsg1l		#N/A	#N/A	#N/A
GSG1L2	#N/A	#N/A	#N/A		#N/A	#N/A	#N/A
GSTCD	#N/A	#N/A	#N/A		#N/A	#N/A	#N/A
GTF3C1	#N/A	#N/A	#N/A		#N/A	#N/A	#N/A
GTF3C3	#N/A	#N/A	#N/A		#N/A	#N/A	#N/A
GUCY2C	#N/A	Gucy2c	Gucy2c		#N/A	#N/A	#N/A
GUCY2D	#N/A	#N/A	#N/A		#N/A	#N/A	#N/A
GUCY2F	#N/A	#N/A	#N/A		#N/A	#N/A	#N/A
GULP1	#N/A	#N/A	#N/A		#N/A	#N/A	#N/A
GYPA	#N/A	#N/A	#N/A		#N/A	#N/A	#N/A
GYPB	#N/A	#N/A	#N/A		#N/A	#N/A	#N/A
GYPC	#N/A	#N/A	#N/A		#N/A	#N/A	#N/A
GYPE	#N/A	#N/A	#N/A		#N/A	#N/A	#N/A
HACD1	#N/A	#N/A	#N/A		#N/A	#N/A	#N/A
HACD2	#N/A	#N/A	#N/A		#N/A	#N/A	#N/A
HACD3	#N/A	#N/A	#N/A		#N/A	#N/A	#N/A
HACD4	#N/A	#N/A	#N/A		#N/A	#N/A	#N/A
HAPLN3	#N/A	#N/A	#N/A		#N/A	#N/A	#N/A
HAS1	#N/A	#N/A	#N/A		#N/A	#N/A	#N/A
HAS2	#N/A	#N/A	#N/A		#N/A	#N/A	#N/A
HAS3	Has3	Has3	Has3		#N/A	#N/A	#N/A
HAVCR1	Havcr1	Havcr1	#N/A		#N/A	#N/A	#N/A
HAVCR2	#N/A	#N/A	#N/A		#N/A	#N/A	#N/A
HBD	#N/A	#N/A	#N/A		#N/A	#N/A	#N/A
HBEGF	#N/A	#N/A	Hbegf		#N/A	#N/A	#N/A
HBS1L	#N/A	#N/A	#N/A		#N/A	Hbs1l	#N/A
HCAR1	#N/A	#N/A	#N/A		#N/A	#N/A	#N/A
HCAR2	#N/A	#N/A	#N/A		#N/A	#N/A	#N/A
HCAR3	#N/A	#N/A	#N/A		#N/A	#N/A	#N/A
HCN1	#N/A	#N/A	#N/A		#N/A	#N/A	#N/A
HCN2	Hcn2	Hcn2	Hcn2		#N/A	#N/A	#N/A
HCN3	#N/A	#N/A	#N/A		#N/A	#N/A	#N/A
HCN4	#N/A	#N/A	#N/A		#N/A	#N/A	#N/A
HCRTR1	#N/A	#N/A	#N/A		#N/A	#N/A	#N/A
HCRTR2	#N/A	#N/A	#N/A		#N/A	#N/A	#N/A
HCST	#N/A	#N/A	#N/A		#N/A	#N/A	#N/A
HDAC10	#N/A	#N/A	#N/A		#N/A	#N/A	#N/A
HEATR5A	#N/A	#N/A	#N/A		#N/A	#N/A	#N/A
HECTD4	#N/A	#N/A	#N/A		#N/A	#N/A	#N/A
HEG1	#N/A	#N/A	#N/A		#N/A	#N/A	#N/A
HELZ	#N/A	#N/A	#N/A		#N/A	#N/A	#N/A
HEPACAM	#N/A	#N/A	#N/A		#N/A	#N/A	#N/A
HEPACAM2	Hepacam2	Hepacam2	Hepacam2		#N/A	#N/A	#N/A
HEPH	#N/A	Heph	Heph		#N/A	#N/A	#N/A
HEPHL1	#N/A	#N/A	#N/A		#N/A	#N/A	#N/A
HERC2	#N/A	#N/A	#N/A		#N/A	#N/A	#N/A
HERC4	#N/A	#N/A	#N/A		#N/A	#N/A	#N/A
HERC5	#N/A	#N/A	#N/A		#N/A	#N/A	#N/A
HERC6	#N/A	#N/A	#N/A		#N/A	#N/A	#N/A
HERPUD1	#N/A	#N/A	#N/A		#N/A	Herpud1	Herpud1
HERPUD2	#N/A	#N/A	#N/A		#N/A	#N/A	#N/A
HFE	#N/A	#N/A	#N/A		#N/A	#N/A	#N/A
HFE2	#N/A	#N/A	#N/A		#N/A	#N/A	#N/A
HGSNAT	#N/A	#N/A	#N/A		#N/A	#N/A	#N/A
HHAT	#N/A	#N/A	Hhat		#N/A	#N/A	#N/A
HHATL	#N/A	#N/A	#N/A		#N/A	#N/A	#N/A
HHIP	#N/A	#N/A	#N/A		Hhip	Hhip	Hhip
HHLA2	#N/A	#N/A	#N/A		#N/A	#N/A	#N/A
HIGD1A	#N/A	#N/A	#N/A		#N/A	#N/A	#N/A
HIGD1B	#N/A	#N/A	#N/A		#N/A	#N/A	#N/A
HIGD1C	#N/A	#N/A	#N/A		#N/A	#N/A	#N/A
HIGD2A	#N/A	#N/A	#N/A		#N/A	#N/A	#N/A
HIGD2B	#N/A	#N/A	#N/A		#N/A	#N/A	#N/A
HILPDA	#N/A	#N/A	Hilpda		#N/A	#N/A	#N/A
HIPK1	#N/A	#N/A	#N/A		#N/A	#N/A	#N/A
HIPK2	#N/A	#N/A	#N/A		#N/A	#N/A	#N/A
HIPK3	#N/A	#N/A	#N/A		#N/A	#N/A	#N/A
HLA-A	#N/A	#N/A	#N/A		#N/A	#N/A	#N/A
HLA-B	#N/A	#N/A	#N/A		#N/A	#N/A	#N/A
HLA-C	#N/A	#N/A	#N/A		#N/A	#N/A	#N/A
HLA-DMA	#N/A	#N/A	#N/A		#N/A	#N/A	#N/A
HLA-DMB	#N/A	#N/A	#N/A		#N/A	#N/A	#N/A
HLA-DOA	#N/A	#N/A	#N/A		#N/A	#N/A	#N/A
HLA-DOB	#N/A	#N/A	#N/A		#N/A	#N/A	#N/A
HLA-DPA1	#N/A	#N/A	#N/A		#N/A	#N/A	#N/A
HLA-DPB1	#N/A	#N/A	#N/A		#N/A	#N/A	#N/A
HLA-DQA1	#N/A	#N/A	#N/A		#N/A	#N/A	#N/A
HLA-DQA2	#N/A	#N/A	#N/A		#N/A	#N/A	#N/A
HLA-DQB1	#N/A	#N/A	#N/A		#N/A	#N/A	#N/A
HLA-DQB2	#N/A	#N/A	#N/A		#N/A	#N/A	#N/A
HLA-DRA	#N/A	#N/A	#N/A		#N/A	#N/A	#N/A
HLA-DRB1	#N/A	#N/A	#N/A		#N/A	#N/A	#N/A
HLA-DRB5	#N/A	#N/A	#N/A		#N/A	#N/A	#N/A
HLA-E	#N/A	#N/A	#N/A		#N/A	#N/A	#N/A
HLA-F	#N/A	#N/A	#N/A		#N/A	#N/A	#N/A
HLA-G	#N/A	#N/A	#N/A		#N/A	#N/A	#N/A
HM13	#N/A	#N/A	#N/A		#N/A	#N/A	#N/A
HMGCR	#N/A	#N/A	#N/A		#N/A	#N/A	#N/A
HMOX1	#N/A	Hmox1	Hmox1		#N/A	#N/A	#N/A
HMOX2	#N/A	#N/A	#N/A		#N/A	#N/A	#N/A
HOXC11	#N/A	#N/A	#N/A		#N/A	#N/A	#N/A
HPN	Hpn	Hpn	Hpn		#N/A	#N/A	#N/A
HPS3	#N/A	#N/A	#N/A		#N/A	#N/A	#N/A
HRASLS	#N/A	#N/A	#N/A		Hrasls	#N/A	#N/A
HRASLS2	#N/A	#N/A	#N/A		#N/A	#N/A	#N/A
HRH1	#N/A	#N/A	#N/A		#N/A	#N/A	#N/A
HRH2	#N/A	#N/A	#N/A		#N/A	#N/A	#N/A
HRH3	#N/A	#N/A	#N/A		#N/A	#N/A	#N/A
HRH4	#N/A	#N/A	#N/A		#N/A	#N/A	#N/A
HRK	#N/A	#N/A	#N/A		#N/A	#N/A	#N/A
HS3ST4	#N/A	#N/A	#N/A		#N/A	#N/A	#N/A
HS6ST2	#N/A	#N/A	#N/A		#N/A	#N/A	#N/A
HSD11B1L	#N/A	#N/A	#N/A		#N/A	#N/A	#N/A
HSD11B2	Hsd11b2	Hsd11b2	Hsd11b2		#N/A	#N/A	#N/A
HSD17B12	#N/A	#N/A	#N/A		#N/A	#N/A	#N/A
HSD17B2	#N/A	Hsd17b2	Hsd17b2		#N/A	#N/A	#N/A
HSD17B3	#N/A	#N/A	#N/A		#N/A	#N/A	#N/A
HSD17B7	#N/A	#N/A	#N/A		#N/A	#N/A	#N/A
HSD3B1	#N/A	#N/A	#N/A		#N/A	#N/A	#N/A
HSD3B2	#N/A	#N/A	#N/A		#N/A	#N/A	#N/A
HSD3B7	#N/A	#N/A	#N/A		#N/A	#N/A	#N/A
HSDL1	#N/A	#N/A	#N/A		#N/A	#N/A	#N/A
HTATIP2	#N/A	#N/A	#N/A		#N/A	#N/A	#N/A
HTR1A	#N/A	#N/A	#N/A		#N/A	#N/A	#N/A
HTR1B	#N/A	#N/A	#N/A		#N/A	#N/A	#N/A
HTR1D	Htr1d	Htr1d	Htr1d		#N/A	#N/A	#N/A
HTR1E	#N/A	#N/A	#N/A		#N/A	#N/A	#N/A
HTR1F	#N/A	#N/A	#N/A		#N/A	#N/A	#N/A
HTR2A	#N/A	#N/A	#N/A		#N/A	#N/A	#N/A
HTR2B	#N/A	#N/A	#N/A		#N/A	#N/A	#N/A
HTR2C	#N/A	#N/A	#N/A		#N/A	#N/A	#N/A
HTR3A	#N/A	#N/A	#N/A		#N/A	#N/A	#N/A
HTR3B	#N/A	#N/A	#N/A		#N/A	#N/A	#N/A
HTR3C	#N/A	#N/A	#N/A		#N/A	#N/A	#N/A
HTR3D	#N/A	#N/A	#N/A		#N/A	#N/A	#N/A
HTR3E	#N/A	#N/A	#N/A		#N/A	#N/A	#N/A
HTR4	#N/A	#N/A	#N/A		#N/A	#N/A	#N/A
HTR5A	#N/A	#N/A	#N/A		#N/A	#N/A	#N/A
HTR6	#N/A	#N/A	#N/A		#N/A	#N/A	#N/A
HTR7	#N/A	#N/A	#N/A		#N/A	#N/A	#N/A
HTRA2	#N/A	#N/A	#N/A		#N/A	#N/A	#N/A
HTT	#N/A	#N/A	#N/A		#N/A	#N/A	#N/A
HUWE1	#N/A	#N/A	#N/A		#N/A	#N/A	#N/A
HVCN1	#N/A	#N/A	#N/A		#N/A	#N/A	#N/A
HYAL2	#N/A	#N/A	#N/A		#N/A	#N/A	#N/A
HYAL4	#N/A	#N/A	#N/A		#N/A	#N/A	#N/A
ICA1	#N/A	#N/A	#N/A		#N/A	#N/A	#N/A
ICAM1	Icam1	Icam1	Icam1		#N/A	#N/A	#N/A
ICAM2	#N/A	#N/A	#N/A		#N/A	#N/A	#N/A
ICAM3	#N/A	#N/A	#N/A		#N/A	#N/A	#N/A
ICAM4	#N/A	#N/A	#N/A		#N/A	#N/A	#N/A
ICAM5	#N/A	Icam5	Icam5		#N/A	#N/A	#N/A
ICMT	#N/A	#N/A	#N/A		#N/A	#N/A	#N/A
ICOS	#N/A	#N/A	#N/A		#N/A	#N/A	#N/A
ICOSLG	#N/A	#N/A	#N/A		#N/A	#N/A	#N/A
IER3	Ier3	Ier3	Ier3		#N/A	#N/A	#N/A
IER3IP1	#N/A	#N/A	#N/A		#N/A	#N/A	#N/A
IFI27	#N/A	#N/A	#N/A		#N/A	#N/A	#N/A
IFI30	#N/A	#N/A	#N/A		#N/A	#N/A	#N/A
IFI6	#N/A	#N/A	#N/A		#N/A	#N/A	#N/A
IFITM1	#N/A	#N/A	#N/A		#N/A	#N/A	#N/A
IFITM10	#N/A	#N/A	#N/A		#N/A	#N/A	#N/A
IFITM2	#N/A	Ifitm2	Ifitm2		#N/A	#N/A	#N/A
IFITM3	Ifitm3	Ifitm3	Ifitm3		#N/A	#N/A	#N/A
IFITM5	#N/A	#N/A	#N/A		#N/A	#N/A	#N/A
IFNAR1	#N/A	#N/A	#N/A		#N/A	#N/A	#N/A
IFNAR2	#N/A	#N/A	#N/A		#N/A	#N/A	#N/A
IFNGR1	#N/A	#N/A	#N/A		#N/A	#N/A	#N/A
IFNGR2	#N/A	#N/A	#N/A		#N/A	#N/A	#N/A
[truncated: 3,522 more rows]

## Sheet: DP
Protein Class	PTEN - Up				PTEN - Down
Gene	PIN	MED	ADV		PIN	MED	ADV
A3GALT2	#N/A	#N/A	#N/A		#N/A	A3galt2	A3galt2
A4GALT	#N/A	#N/A	#N/A		#N/A	#N/A	#N/A
AACS	#N/A	#N/A	#N/A		#N/A	#N/A	#N/A
AADACL3	#N/A	#N/A	#N/A		#N/A	#N/A	#N/A
AADACL4	#N/A	#N/A	#N/A		#N/A	#N/A	#N/A
AASDH	#N/A	#N/A	#N/A		#N/A	#N/A	#N/A
AATK	#N/A	#N/A	#N/A		#N/A	#N/A	Aatk
ABCA1	#N/A	#N/A	#N/A		#N/A	#N/A	#N/A
ABCA10	#N/A	#N/A	#N/A		#N/A	#N/A	#N/A
ABCA12	#N/A	#N/A	#N/A		#N/A	#N/A	#N/A
ABCA13	#N/A	#N/A	#N/A		#N/A	#N/A	#N/A
ABCA2	#N/A	#N/A	#N/A		#N/A	#N/A	#N/A
ABCA3	#N/A	#N/A	#N/A		#N/A	#N/A	#N/A
ABCA4	#N/A	#N/A	Abca4		#N/A	#N/A	#N/A
ABCA5	#N/A	#N/A	#N/A		Abca5	Abca5	Abca5
ABCA6	#N/A	#N/A	#N/A		Abca6	Abca6	#N/A
ABCA7	#N/A	#N/A	#N/A		#N/A	#N/A	#N/A
ABCA8	#N/A	#N/A	#N/A		#N/A	#N/A	#N/A
ABCA9	#N/A	#N/A	#N/A		Abca9	Abca9	#N/A
ABCB1	#N/A	#N/A	#N/A		#N/A	#N/A	#N/A
ABCB10	#N/A	#N/A	#N/A		#N/A	#N/A	#N/A
ABCB11	#N/A	#N/A	#N/A		#N/A	#N/A	#N/A
ABCB4	#N/A	#N/A	#N/A		#N/A	#N/A	#N/A
ABCB5	#N/A	#N/A	#N/A		#N/A	#N/A	#N/A
ABCB6	#N/A	#N/A	#N/A		#N/A	#N/A	#N/A
ABCB7	#N/A	#N/A	#N/A		#N/A	#N/A	#N/A
ABCB8	#N/A	#N/A	#N/A		#N/A	#N/A	#N/A
ABCB9	#N/A	#N/A	#N/A		#N/A	#N/A	#N/A
ABCC1	#N/A	#N/A	#N/A		#N/A	#N/A	#N/A
ABCC10	#N/A	#N/A	#N/A		#N/A	#N/A	#N/A
ABCC11	#N/A	#N/A	#N/A		#N/A	#N/A	#N/A
ABCC12	#N/A	#N/A	#N/A		Abcc12	Abcc12	Abcc12
ABCC2	#N/A	#N/A	#N/A		#N/A	#N/A	#N/A
ABCC3	#N/A	#N/A	#N/A		#N/A	#N/A	Abcc3
ABCC4	#N/A	#N/A	#N/A		#N/A	#N/A	#N/A
ABCC5	Abcc5	Abcc5	Abcc5		#N/A	#N/A	#N/A
ABCC6	#N/A	#N/A	#N/A		#N/A	#N/A	#N/A
ABCC8	#N/A	#N/A	#N/A		#N/A	#N/A	#N/A
ABCC9	#N/A	#N/A	#N/A		#N/A	#N/A	#N/A
ABCD1	#N/A	#N/A	#N/A		#N/A	#N/A	#N/A
ABCD2	#N/A	#N/A	#N/A		#N/A	#N/A	#N/A
ABCD3	#N/A	#N/A	#N/A		#N/A	#N/A	#N/A
ABCD4	#N/A	#N/A	#N/A		#N/A	#N/A	#N/A
ABCG1	Abcg1	Abcg1	Abcg1		#N/A	#N/A	#N/A
ABCG2	#N/A	#N/A	#N/A		#N/A	#N/A	#N/A
ABCG4	#N/A	#N/A	#N/A		#N/A	#N/A	Abcg4
ABCG5	Abcg5	Abcg5	#N/A		#N/A	#N/A	#N/A
ABCG8	Abcg8	Abcg8	#N/A		#N/A	#N/A	#N/A
ABHD1	#N/A	#N/A	#N/A		#N/A	#N/A	#N/A
ABHD12	#N/A	#N/A	#N/A		#N/A	Abhd12	Abhd12
ABHD13	#N/A	#N/A	#N/A		#N/A	#N/A	#N/A
ABHD14A	#N/A	#N/A	#N/A		#N/A	Abhd14a	#N/A
ABHD16A	#N/A	#N/A	#N/A		#N/A	#N/A	#N/A
ABHD2	#N/A	#N/A	#N/A		#N/A	#N/A	#N/A
ABHD3	#N/A	#N/A	#N/A		#N/A	#N/A	Abhd3
ABHD6	#N/A	#N/A	#N/A		#N/A	#N/A	#N/A
ABO	#N/A	#N/A	#N/A		#N/A	#N/A	Abo
AC001226.2	#N/A	#N/A	#N/A		#N/A	#N/A	#N/A
AC004691.2	#N/A	#N/A	#N/A		#N/A	#N/A	#N/A
AC004754.1	#N/A	#N/A	#N/A		#N/A	#N/A	#N/A
AC004832.3	#N/A	#N/A	#N/A		#N/A	#N/A	#N/A
AC005551.1	#N/A	#N/A	#N/A		#N/A	#N/A	#N/A
AC006538.2	#N/A	#N/A	#N/A		#N/A	#N/A	#N/A
AC007040.2	#N/A	#N/A	#N/A		#N/A	#N/A	#N/A
AC008397.1	#N/A	#N/A	#N/A		#N/A	#N/A	#N/A
AC009163.4	#N/A	#N/A	#N/A		#N/A	#N/A	#N/A
AC009477.2	#N/A	#N/A	#N/A		#N/A	#N/A	#N/A
AC010319.2	#N/A	#N/A	#N/A		#N/A	#N/A	#N/A
AC010325.1	#N/A	#N/A	#N/A		#N/A	#N/A	#N/A
AC011448.1	#N/A	#N/A	#N/A		#N/A	#N/A	#N/A
AC011604.2	#N/A	#N/A	#N/A		#N/A	#N/A	#N/A
AC018709.1	#N/A	#N/A	#N/A		#N/A	#N/A	#N/A
AC018755.2	#N/A	#N/A	#N/A		#N/A	#N/A	#N/A
AC022167.5	#N/A	#N/A	#N/A		#N/A	#N/A	#N/A
AC024592.3	#N/A	#N/A	#N/A		#N/A	#N/A	#N/A
AC026316.5	#N/A	#N/A	#N/A		#N/A	#N/A	#N/A
AC068580.4	#N/A	#N/A	#N/A		#N/A	#N/A	#N/A
AC068775.1	#N/A	#N/A	#N/A		#N/A	#N/A	#N/A
AC068987.5	#N/A	#N/A	#N/A		#N/A	#N/A	#N/A
AC078864.2	#N/A	#N/A	#N/A		#N/A	#N/A	#N/A
AC087498.1	#N/A	#N/A	#N/A		#N/A	#N/A	#N/A
AC092143.1	#N/A	#N/A	#N/A		#N/A	#N/A	#N/A
AC092718.3	#N/A	#N/A	#N/A		#N/A	#N/A	#N/A
AC093525.2	#N/A	#N/A	#N/A		#N/A	#N/A	#N/A
AC097637.1	#N/A	#N/A	#N/A		#N/A	#N/A	#N/A
AC100868.1	#N/A	#N/A	#N/A		#N/A	#N/A	#N/A
AC116565.1	#N/A	#N/A	#N/A		#N/A	#N/A	#N/A
AC117457.1	#N/A	#N/A	#N/A		#N/A	#N/A	#N/A
AC118553.2	#N/A	#N/A	#N/A		#N/A	#N/A	#N/A
AC119396.1	#N/A	#N/A	#N/A		#N/A	#N/A	#N/A
AC126755.2	#N/A	#N/A	#N/A		#N/A	#N/A	#N/A
AC129492.3	#N/A	#N/A	#N/A		#N/A	#N/A	#N/A
AC131160.1	#N/A	#N/A	#N/A		#N/A	#N/A	#N/A
AC134669.1	#N/A	#N/A	#N/A		#N/A	#N/A	#N/A
AC134980.5	#N/A	#N/A	#N/A		#N/A	#N/A	#N/A
AC135068.1	#N/A	#N/A	#N/A		#N/A	#N/A	#N/A
AC135068.3	#N/A	#N/A	#N/A		#N/A	#N/A	#N/A
AC136616.1	#N/A	#N/A	#N/A		#N/A	#N/A	#N/A
AC138811.2	#N/A	#N/A	#N/A		#N/A	#N/A	#N/A
AC138894.1	#N/A	#N/A	#N/A		#N/A	#N/A	#N/A
AC138969.1	#N/A	#N/A	#N/A		#N/A	#N/A	#N/A
AC171558.1	#N/A	#N/A	#N/A		#N/A	#N/A	#N/A
AC171558.3	#N/A	#N/A	#N/A		#N/A	#N/A	#N/A
AC213203.1	#N/A	#N/A	#N/A		#N/A	#N/A	#N/A
ACBD4	#N/A	#N/A	#N/A		#N/A	#N/A	#N/A
ACBD5	#N/A	#N/A	#N/A		#N/A	#N/A	#N/A
ACE	#N/A	#N/A	#N/A		#N/A	#N/A	Ace
ACE2	#N/A	#N/A	#N/A		#N/A	#N/A	#N/A
ACER1	#N/A	#N/A	#N/A		#N/A	#N/A	#N/A
ACER2	#N/A	#N/A	#N/A		#N/A	#N/A	#N/A
ACER3	Acer3	Acer3	Acer3		#N/A	#N/A	#N/A
ACHE	#N/A	#N/A	#N/A		#N/A	#N/A	Ache
ACKR1	#N/A	#N/A	#N/A		#N/A	#N/A	#N/A
ACKR2	#N/A	#N/A	#N/A		#N/A	#N/A	#N/A
ACKR3	#N/A	#N/A	#N/A		#N/A	#N/A	#N/A
ACKR4	#N/A	#N/A	#N/A		#N/A	#N/A	#N/A
ACP2	#N/A	#N/A	#N/A		#N/A	#N/A	#N/A
ACP4	#N/A	#N/A	#N/A		#N/A	#N/A	#N/A
ACPP	#N/A	#N/A	#N/A		#N/A	#N/A	Acpp
ACSBG2	#N/A	#N/A	#N/A		#N/A	#N/A	#N/A
ACSF2	#N/A	#N/A	#N/A		#N/A	#N/A	#N/A
ACSF3	#N/A	#N/A	#N/A		#N/A	#N/A	#N/A
ACSL1	#N/A	#N/A	#N/A		#N/A	#N/A	Acsl1
ACSL3	#N/A	#N/A	#N/A		#N/A	#N/A	#N/A
ACSL4	#N/A	#N/A	#N/A		#N/A	Acsl4	#N/A
ACSL5	#N/A	#N/A	#N/A		#N/A	#N/A	#N/A
ACSL6	#N/A	#N/A	#N/A		#N/A	#N/A	#N/A
ACSM1	Acsm1	Acsm1	#N/A		#N/A	#N/A	#N/A
ACSM2A	#N/A	#N/A	#N/A		#N/A	#N/A	#N/A
ACSM2B	#N/A	#N/A	#N/A		#N/A	#N/A	#N/A
ACSM4	#N/A	#N/A	#N/A		#N/A	#N/A	#N/A
ACSM6	#N/A	#N/A	#N/A		#N/A	#N/A	#N/A
ACSS1	#N/A	#N/A	#N/A		#N/A	#N/A	Acss1
ACSS2	#N/A	#N/A	#N/A		#N/A	#N/A	#N/A
ACSS3	#N/A	#N/A	#N/A		#N/A	#N/A	#N/A
ACVR1	#N/A	#N/A	#N/A		#N/A	#N/A	#N/A
ACVR1B	#N/A	#N/A	#N/A		#N/A	#N/A	#N/A
ACVR1C	#N/A	#N/A	#N/A		#N/A	#N/A	Acvr1c
ACVR2A	#N/A	#N/A	#N/A		#N/A	#N/A	#N/A
ACVR2B	#N/A	#N/A	#N/A		#N/A	#N/A	#N/A
ACVRL1	#N/A	#N/A	#N/A		#N/A	#N/A	#N/A
ADAM10	#N/A	#N/A	#N/A		#N/A	#N/A	#N/A
ADAM11	#N/A	#N/A	#N/A		Adam11	Adam11	#N/A
ADAM12	#N/A	#N/A	Adam12		#N/A	#N/A	#N/A
ADAM15	#N/A	#N/A	#N/A		#N/A	#N/A	#N/A
ADAM17	#N/A	#N/A	#N/A		#N/A	#N/A	#N/A
ADAM18	#N/A	#N/A	#N/A		#N/A	#N/A	#N/A
ADAM19	#N/A	#N/A	#N/A		#N/A	#N/A	#N/A
ADAM2	#N/A	#N/A	#N/A		#N/A	#N/A	#N/A
ADAM20	#N/A	#N/A	#N/A		#N/A	#N/A	#N/A
ADAM21	#N/A	#N/A	#N/A		#N/A	#N/A	#N/A
ADAM22	#N/A	#N/A	#N/A		#N/A	#N/A	#N/A
ADAM23	#N/A	#N/A	#N/A		#N/A	#N/A	#N/A
ADAM28	#N/A	#N/A	#N/A		#N/A	#N/A	Adam28
ADAM29	#N/A	#N/A	#N/A		#N/A	#N/A	#N/A
ADAM30	#N/A	#N/A	#N/A		#N/A	#N/A	#N/A
ADAM32	#N/A	#N/A	#N/A		#N/A	#N/A	#N/A
ADAM33	#N/A	#N/A	#N/A		#N/A	#N/A	Adam33
ADAM7	#N/A	#N/A	#N/A		#N/A	#N/A	#N/A
ADAM8	#N/A	#N/A	Adam8		#N/A	#N/A	#N/A
ADAM9	#N/A	#N/A	#N/A		#N/A	#N/A	#N/A
ADAMTS1	#N/A	#N/A	#N/A		#N/A	#N/A	#N/A
ADAMTS4	#N/A	#N/A	Adamts4		#N/A	#N/A	#N/A
ADCK2	#N/A	#N/A	#N/A		#N/A	#N/A	#N/A
ADCK5	#N/A	#N/A	#N/A		#N/A	#N/A	#N/A
ADCY1	#N/A	#N/A	#N/A		#N/A	#N/A	#N/A
ADCY10	#N/A	#N/A	#N/A		#N/A	#N/A	#N/A
ADCY2	#N/A	#N/A	#N/A		#N/A	#N/A	#N/A
ADCY3	#N/A	#N/A	#N/A		#N/A	#N/A	#N/A
ADCY4	#N/A	#N/A	#N/A		#N/A	#N/A	#N/A
ADCY5	#N/A	#N/A	#N/A		Adcy5	Adcy5	Adcy5
ADCY6	#N/A	#N/A	#N/A		#N/A	#N/A	#N/A
ADCY7	#N/A	#N/A	#N/A		#N/A	#N/A	#N/A
ADCY8	Adcy8	Adcy8	Adcy8		#N/A	#N/A	#N/A
ADCY9	#N/A	#N/A	#N/A		#N/A	#N/A	Adcy9
ADCYAP1R1	#N/A	#N/A	#N/A		#N/A	#N/A	Adcyap1r1
ADGRA1	#N/A	#N/A	#N/A		#N/A	#N/A	#N/A
ADGRA2	#N/A	#N/A	#N/A		#N/A	#N/A	#N/A
ADGRA3	#N/A	#N/A	#N/A		#N/A	#N/A	#N/A
ADGRB1	#N/A	#N/A	#N/A		#N/A	#N/A	#N/A
ADGRB2	#N/A	#N/A	#N/A		#N/A	#N/A	#N/A
ADGRB3	#N/A	#N/A	#N/A		#N/A	#N/A	#N/A
ADGRD1	#N/A	#N/A	#N/A		#N/A	#N/A	#N/A
ADGRD2	#N/A	#N/A	#N/A		#N/A	#N/A	#N/A
ADGRE1	#N/A	#N/A	#N/A		#N/A	#N/A	#N/A
ADGRE2	#N/A	#N/A	#N/A		#N/A	#N/A	#N/A
ADGRE3	#N/A	#N/A	#N/A		#N/A	#N/A	#N/A
ADGRE5	#N/A	#N/A	#N/A		#N/A	#N/A	#N/A
ADGRF1	#N/A	#N/A	#N/A		#N/A	#N/A	#N/A
ADGRF2	#N/A	#N/A	#N/A		#N/A	#N/A	#N/A
ADGRF3	#N/A	#N/A	#N/A		#N/A	#N/A	#N/A
ADGRF4	#N/A	#N/A	#N/A		#N/A	#N/A	#N/A
ADGRF5	#N/A	#N/A	#N/A		#N/A	#N/A	#N/A
ADGRG1	#N/A	#N/A	#N/A		#N/A	#N/A	#N/A
ADGRG2	#N/A	#N/A	#N/A		#N/A	#N/A	#N/A
ADGRG3	#N/A	#N/A	#N/A		#N/A	#N/A	#N/A
ADGRG4	#N/A	#N/A	#N/A		#N/A	#N/A	#N/A
ADGRG5	#N/A	#N/A	#N/A		#N/A	#N/A	#N/A
ADGRG6	#N/A	#N/A	#N/A		#N/A	#N/A	#N/A
ADGRG7	#N/A	#N/A	#N/A		#N/A	#N/A	#N/A
ADGRL1	#N/A	#N/A	#N/A		#N/A	#N/A	#N/A
ADGRL2	#N/A	#N/A	#N/A		#N/A	#N/A	#N/A
ADGRL3	#N/A	#N/A	#N/A		#N/A	#N/A	#N/A
ADGRL4	#N/A	#N/A	#N/A		#N/A	#N/A	#N/A
ADGRV1	#N/A	#N/A	#N/A		#N/A	#N/A	#N/A
ADIG	#N/A	#N/A	#N/A		#N/A	#N/A	Adig
ADIPOR1	#N/A	#N/A	#N/A		#N/A	#N/A	#N/A
ADIPOR2	#N/A	#N/A	#N/A		#N/A	#N/A	Adipor2
ADORA1	#N/A	#N/A	#N/A		#N/A	#N/A	#N/A
ADORA2A	#N/A	#N/A	#N/A		#N/A	#N/A	#N/A
ADORA2B	Adora2b	Adora2b	Adora2b		#N/A	#N/A	#N/A
ADORA3	#N/A	#N/A	#N/A		#N/A	#N/A	#N/A
ADPRM	#N/A	#N/A	#N/A		#N/A	#N/A	#N/A
ADRA1A	#N/A	#N/A	#N/A		#N/A	Adra1a	Adra1a
ADRA1B	#N/A	#N/A	#N/A		#N/A	#N/A	#N/A
ADRA1D	#N/A	#N/A	#N/A		#N/A	#N/A	#N/A
ADRA2A	#N/A	#N/A	#N/A		#N/A	#N/A	#N/A
ADRA2B	#N/A	#N/A	#N/A		#N/A	#N/A	#N/A
ADRA2C	#N/A	#N/A	#N/A		#N/A	#N/A	#N/A
ADRB1	Adrb1	Adrb1	#N/A		#N/A	#N/A	#N/A
ADRB2	#N/A	#N/A	#N/A		#N/A	#N/A	Adrb2
ADRB3	#N/A	#N/A	#N/A		#N/A	#N/A	Adrb3
ADTRP	#N/A	#N/A	#N/A		#N/A	#N/A	#N/A
AF241726.2	#N/A	#N/A	#N/A		#N/A	#N/A	#N/A
AFG3L2	#N/A	#N/A	#N/A		#N/A	#N/A	#N/A
AGER	#N/A	#N/A	Ager		#N/A	#N/A	#N/A
AGL	#N/A	#N/A	#N/A		#N/A	#N/A	#N/A
AGMO	#N/A	#N/A	#N/A		#N/A	#N/A	#N/A
AGPAT1	#N/A	#N/A	#N/A		#N/A	#N/A	#N/A
AGPAT2	Agpat2	#N/A	#N/A		#N/A	#N/A	#N/A
AGPAT3	#N/A	#N/A	#N/A		#N/A	#N/A	#N/A
AGPAT4	#N/A	#N/A	#N/A		#N/A	#N/A	#N/A
AGPAT5	#N/A	#N/A	#N/A		#N/A	#N/A	#N/A
AGRN	#N/A	Agrn	#N/A		#N/A	#N/A	#N/A
AGTR1	#N/A	#N/A	#N/A		#N/A	#N/A	#N/A
AGTR2	#N/A	#N/A	#N/A		#N/A	#N/A	#N/A
AGTRAP	#N/A	#N/A	#N/A		#N/A	#N/A	#N/A
AIFM1	#N/A	#N/A	#N/A		#N/A	#N/A	#N/A
AIG1	#N/A	#N/A	#N/A		#N/A	#N/A	#N/A
AJAP1	#N/A	#N/A	#N/A		#N/A	#N/A	Ajap1
AKAP1	#N/A	#N/A	#N/A		#N/A	#N/A	#N/A
AKAP6	#N/A	#N/A	#N/A		#N/A	#N/A	Akap6
AKAP9	#N/A	#N/A	#N/A		#N/A	#N/A	#N/A
AL034430.1	#N/A	#N/A	#N/A		#N/A	#N/A	#N/A
AL035460.1	#N/A	#N/A	#N/A		#N/A	#N/A	#N/A
AL121845.3	#N/A	#N/A	#N/A		#N/A	#N/A	#N/A
AL121900.2	#N/A	#N/A	#N/A		#N/A	#N/A	#N/A
AL136295.1	#N/A	#N/A	#N/A		#N/A	#N/A	#N/A
AL136295.3	#N/A	#N/A	#N/A		#N/A	#N/A	#N/A
AL136373.1	#N/A	#N/A	#N/A		#N/A	#N/A	#N/A
AL391650.1	#N/A	#N/A	#N/A		#N/A	#N/A	#N/A
AL590132.1	#N/A	#N/A	#N/A		#N/A	#N/A	#N/A
AL592490.1	#N/A	#N/A	#N/A		#N/A	#N/A	#N/A
AL662820.1	#N/A	#N/A	#N/A		#N/A	#N/A	#N/A
AL669918.1	#N/A	#N/A	#N/A		#N/A	#N/A	#N/A
AL691442.1	#N/A	#N/A	#N/A		#N/A	#N/A	#N/A
AL845331.2	#N/A	#N/A	#N/A		#N/A	#N/A	#N/A
ALCAM	#N/A	#N/A	#N/A		#N/A	#N/A	#N/A
ALDH16A1	#N/A	#N/A	#N/A		#N/A	#N/A	#N/A
ALDH3A2	#N/A	#N/A	#N/A		#N/A	#N/A	#N/A
ALDH3B2	Aldh3b2	Aldh3b2	#N/A		#N/A	#N/A	#N/A
ALDH6A1	#N/A	#N/A	#N/A		#N/A	#N/A	Aldh6a1
ALDOA	#N/A	#N/A	#N/A		#N/A	#N/A	#N/A
ALG1	#N/A	#N/A	#N/A		#N/A	#N/A	#N/A
ALG10	#N/A	#N/A	#N/A		#N/A	#N/A	#N/A
ALG10B	#N/A	#N/A	#N/A		#N/A	#N/A	#N/A
ALG11	#N/A	#N/A	#N/A		#N/A	#N/A	#N/A
ALG12	#N/A	#N/A	#N/A		#N/A	#N/A	#N/A
ALG14	#N/A	#N/A	Alg14		#N/A	#N/A	#N/A
ALG2	#N/A	#N/A	#N/A		#N/A	#N/A	#N/A
ALG3	#N/A	#N/A	#N/A		#N/A	#N/A	#N/A
ALG5	#N/A	#N/A	#N/A		#N/A	#N/A	#N/A
ALG6	#N/A	#N/A	#N/A		#N/A	#N/A	#N/A
ALG8	#N/A	#N/A	#N/A		#N/A	#N/A	#N/A
ALG9	#N/A	#N/A	#N/A		#N/A	#N/A	#N/A
ALK	#N/A	#N/A	#N/A		#N/A	#N/A	#N/A
ALOX5AP	#N/A	#N/A	#N/A		#N/A	#N/A	#N/A
ALPK1	Alpk1	Alpk1	Alpk1		#N/A	#N/A	#N/A
ALPL	#N/A	#N/A	#N/A		#N/A	#N/A	#N/A
AMFR	#N/A	#N/A	#N/A		#N/A	#N/A	#N/A
AMHR2	#N/A	#N/A	#N/A		#N/A	Amhr2	#N/A
AMIGO1	#N/A	#N/A	#N/A		#N/A	#N/A	Amigo1
AMIGO2	#N/A	#N/A	#N/A		#N/A	#N/A	#N/A
AMIGO3	#N/A	#N/A	#N/A		#N/A	#N/A	#N/A
AMN	#N/A	#N/A	Amn		#N/A	#N/A	#N/A
ANAPC1	#N/A	#N/A	#N/A		#N/A	#N/A	#N/A
ANKH	#N/A	#N/A	#N/A		#N/A	#N/A	#N/A
ANKLE1	Ankle1	Ankle1	Ankle1		#N/A	#N/A	#N/A
ANKLE2	#N/A	#N/A	#N/A		#N/A	#N/A	#N/A
ANKRD29	#N/A	#N/A	#N/A		#N/A	#N/A	#N/A
ANKRD46	#N/A	#N/A	#N/A		#N/A	#N/A	#N/A
ANO1	#N/A	#N/A	#N/A		#N/A	#N/A	#N/A
ANO10	#N/A	#N/A	#N/A		#N/A	#N/A	#N/A
ANO2	#N/A	#N/A	#N/A		#N/A	#N/A	#N/A
ANO3	#N/A	#N/A	#N/A		#N/A	#N/A	#N/A
ANO4	#N/A	#N/A	#N/A		#N/A	#N/A	#N/A
ANO5	#N/A	#N/A	#N/A		#N/A	#N/A	#N/A
ANO6	#N/A	#N/A	#N/A		#N/A	#N/A	#N/A
ANO7	#N/A	#N/A	#N/A		#N/A	#N/A	#N/A
ANO8	#N/A	#N/A	#N/A		#N/A	#N/A	#N/A
ANO9	Ano9	Ano9	Ano9		#N/A	#N/A	#N/A
ANPEP	Anpep	Anpep	Anpep		#N/A	#N/A	#N/A
ANTXR1	#N/A	#N/A	#N/A		#N/A	#N/A	#N/A
ANTXR2	#N/A	#N/A	#N/A		#N/A	#N/A	#N/A
ANTXRL	#N/A	#N/A	#N/A		#N/A	#N/A	#N/A
AP000350.4	#N/A	#N/A	#N/A		#N/A	#N/A	#N/A
AP000781.2	#N/A	#N/A	#N/A		#N/A	#N/A	#N/A
AP001781.2	#N/A	#N/A	#N/A		#N/A	#N/A	#N/A
AP002512.3	#N/A	#N/A	#N/A		#N/A	#N/A	#N/A
AP003071.5	#N/A	#N/A	#N/A		#N/A	#N/A	#N/A
AP006437.1	#N/A	#N/A	#N/A		#N/A	#N/A	#N/A
AP5S1	#N/A	#N/A	#N/A		#N/A	#N/A	#N/A
APCDD1	#N/A	#N/A	#N/A		Apcdd1	Apcdd1	#N/A
APCDD1L	#N/A	#N/A	#N/A		#N/A	#N/A	#N/A
APH1A	#N/A	#N/A	#N/A		#N/A	#N/A	#N/A
APH1B	#N/A	#N/A	#N/A		#N/A	#N/A	#N/A
APLF	#N/A	#N/A	#N/A		#N/A	#N/A	#N/A
APLNR	#N/A	#N/A	#N/A		#N/A	#N/A	#N/A
APLP1	#N/A	#N/A	#N/A		#N/A	#N/A	#N/A
APLP2	#N/A	#N/A	#N/A		#N/A	#N/A	#N/A
APMAP	#N/A	#N/A	#N/A		#N/A	#N/A	#N/A
APOC4-APOC2	#N/A	#N/A	#N/A		#N/A	#N/A	#N/A
APOL1	#N/A	#N/A	#N/A		#N/A	#N/A	#N/A
APOL2	#N/A	#N/A	#N/A		#N/A	#N/A	#N/A
APOL4	#N/A	#N/A	#N/A		#N/A	#N/A	#N/A
APOL6	#N/A	#N/A	#N/A		#N/A	#N/A	#N/A
APOLD1	#N/A	#N/A	#N/A		#N/A	#N/A	#N/A
APOO	#N/A	#N/A	#N/A		#N/A	#N/A	#N/A
APP	#N/A	#N/A	#N/A		#N/A	#N/A	#N/A
AQP1	#N/A	#N/A	#N/A		#N/A	#N/A	#N/A
AQP10	#N/A	#N/A	#N/A		#N/A	#N/A	#N/A
AQP11	#N/A	#N/A	#N/A		#N/A	#N/A	#N/A
AQP12A	#N/A	#N/A	#N/A		#N/A	#N/A	#N/A
AQP12B	#N/A	#N/A	#N/A		#N/A	#N/A	#N/A
AQP2	#N/A	#N/A	#N/A		#N/A	#N/A	#N/A
AQP3	#N/A	#N/A	Aqp3		#N/A	#N/A	#N/A
AQP4	#N/A	#N/A	#N/A		#N/A	#N/A	#N/A
AQP5	#N/A	Aqp5	#N/A		#N/A	#N/A	#N/A
AQP6	#N/A	#N/A	#N/A		#N/A	#N/A	#N/A
AQP7	#N/A	#N/A	#N/A		#N/A	#N/A	#N/A
AQP8	#N/A	#N/A	#N/A		#N/A	#N/A	#N/A
AQP9	#N/A	#N/A	#N/A		#N/A	#N/A	#N/A
AQR	#N/A	#N/A	#N/A		#N/A	#N/A	#N/A
AREG	#N/A	#N/A	Areg		#N/A	#N/A	#N/A
AREL1	#N/A	#N/A	#N/A		#N/A	#N/A	#N/A
ARHGAP1	#N/A	#N/A	#N/A		#N/A	#N/A	#N/A
ARHGAP26	#N/A	#N/A	#N/A		#N/A	#N/A	#N/A
ARHGAP42	#N/A	#N/A	Arhgap42		#N/A	#N/A	#N/A
ARIH2OS	#N/A	#N/A	#N/A		#N/A	#N/A	#N/A
ARL10	#N/A	#N/A	#N/A		#N/A	#N/A	#N/A
ARL6IP1	#N/A	#N/A	#N/A		#N/A	#N/A	#N/A
ARL6IP5	#N/A	#N/A	#N/A		#N/A	#N/A	#N/A
ARL6IP6	#N/A	#N/A	#N/A		#N/A	#N/A	#N/A
ARMC10	#N/A	#N/A	#N/A		#N/A	#N/A	#N/A
ARMCX1	#N/A	#N/A	#N/A		#N/A	#N/A	#N/A
ARMCX2	#N/A	#N/A	#N/A		#N/A	#N/A	#N/A
ARMCX3	#N/A	#N/A	#N/A		#N/A	#N/A	#N/A
ARMCX6	#N/A	#N/A	#N/A		#N/A	#N/A	#N/A
ARSD	#N/A	#N/A	#N/A		#N/A	#N/A	#N/A
ARSE	#N/A	#N/A	#N/A		#N/A	#N/A	#N/A
ARSF	#N/A	#N/A	#N/A		#N/A	#N/A	#N/A
ARSH	#N/A	#N/A	#N/A		#N/A	#N/A	#N/A
ART1	#N/A	#N/A	#N/A		#N/A	#N/A	#N/A
ART3	#N/A	#N/A	#N/A		Art3	Art3	Art3
ART4	#N/A	#N/A	#N/A		#N/A	#N/A	#N/A
ARV1	#N/A	#N/A	#N/A		#N/A	#N/A	#N/A
ASB11	#N/A	#N/A	#N/A		#N/A	#N/A	#N/A
ASB18	#N/A	#N/A	#N/A		#N/A	#N/A	#N/A
ASB5	#N/A	#N/A	#N/A		#N/A	#N/A	#N/A
ASGR2	#N/A	#N/A	Asgr2		#N/A	#N/A	#N/A
ASIC1	#N/A	#N/A	#N/A		#N/A	#N/A	#N/A
ASIC2	#N/A	#N/A	#N/A		#N/A	#N/A	#N/A
ASIC3	#N/A	#N/A	#N/A		#N/A	#N/A	#N/A
ASIC4	#N/A	#N/A	#N/A		Asic4	Asic4	Asic4
ASIC5	#N/A	#N/A	#N/A		#N/A	#N/A	#N/A
ASPH	#N/A	#N/A	#N/A		#N/A	#N/A	#N/A
ASPHD1	#N/A	#N/A	#N/A		#N/A	#N/A	#N/A
ASPHD2	#N/A	#N/A	#N/A		#N/A	#N/A	#N/A
ASPRV1	#N/A	#N/A	#N/A		#N/A	#N/A	#N/A
ASTN1	#N/A	#N/A	#N/A		#N/A	#N/A	#N/A
ASTN2	#N/A	#N/A	#N/A		#N/A	#N/A	#N/A
ASZ1	#N/A	#N/A	#N/A		#N/A	#N/A	#N/A
ATAD1	#N/A	#N/A	#N/A		#N/A	#N/A	#N/A
ATF6	#N/A	#N/A	#N/A		Atf6	Atf6	Atf6
ATF6B	#N/A	#N/A	#N/A		#N/A	#N/A	#N/A
ATF7	#N/A	#N/A	#N/A		#N/A	#N/A	#N/A
ATG9A	#N/A	#N/A	#N/A		#N/A	#N/A	#N/A
ATG9B	#N/A	#N/A	Atg9b		#N/A	#N/A	#N/A
ATL1	#N/A	#N/A	#N/A		#N/A	#N/A	#N/A
ATL2	#N/A	#N/A	#N/A		#N/A	#N/A	#N/A
ATL3	#N/A	#N/A	#N/A		#N/A	#N/A	#N/A
ATM	#N/A	#N/A	#N/A		#N/A	#N/A	#N/A
ATP10A	#N/A	#N/A	Atp10a		#N/A	#N/A	#N/A
ATP10B	Atp10b	Atp10b	Atp10b		#N/A	#N/A	#N/A
ATP10D	#N/A	#N/A	#N/A		#N/A	#N/A	#N/A
ATP11A	#N/A	#N/A	#N/A		#N/A	#N/A	#N/A
ATP11B	#N/A	#N/A	#N/A		#N/A	#N/A	#N/A
ATP11C	#N/A	#N/A	#N/A		#N/A	#N/A	#N/A
ATP12A	#N/A	#N/A	#N/A		Atp12a	Atp12a	Atp12a
ATP13A1	#N/A	#N/A	#N/A		#N/A	#N/A	#N/A
ATP13A2	#N/A	#N/A	#N/A		#N/A	#N/A	#N/A
ATP13A3	#N/A	#N/A	#N/A		#N/A	#N/A	#N/A
ATP13A4	#N/A	#N/A	#N/A		Atp13a4	Atp13a4	#N/A
ATP13A5	#N/A	#N/A	#N/A		#N/A	#N/A	#N/A
ATP1A1	Atp1a1	Atp1a1	#N/A		#N/A	#N/A	#N/A
ATP1A2	#N/A	#N/A	#N/A		#N/A	#N/A	#N/A
ATP1A3	#N/A	#N/A	#N/A		#N/A	#N/A	#N/A
ATP1A4	#N/A	#N/A	#N/A		#N/A	#N/A	#N/A
ATP1B1	Atp1b1	Atp1b1	#N/A		#N/A	#N/A	#N/A
ATP1B2	#N/A	#N/A	#N/A		#N/A	#N/A	#N/A
ATP1B3	#N/A	#N/A	#N/A		#N/A	#N/A	#N/A
ATP1B4	#N/A	#N/A	#N/A		#N/A	#N/A	#N/A
ATP2A1	#N/A	#N/A	#N/A		#N/A	#N/A	#N/A
ATP2A2	#N/A	#N/A	#N/A		#N/A	#N/A	#N/A
ATP2A3	Atp2a3	Atp2a3	#N/A		#N/A	#N/A	#N/A
ATP2B1	#N/A	#N/A	#N/A		#N/A	#N/A	#N/A
ATP2B2	#N/A	#N/A	#N/A		#N/A	#N/A	Atp2b2
ATP2B3	#N/A	#N/A	#N/A		#N/A	Atp2b3	#N/A
ATP2B4	#N/A	#N/A	#N/A		Atp2b4	Atp2b4	#N/A
ATP2C1	#N/A	#N/A	#N/A		#N/A	#N/A	#N/A
ATP2C2	Atp2c2	Atp2c2	#N/A		#N/A	#N/A	#N/A
ATP4A	#N/A	#N/A	#N/A		#N/A	#N/A	Atp4a
ATP4B	#N/A	#N/A	#N/A		#N/A	#N/A	#N/A
ATP5MC1	#N/A	#N/A	#N/A		#N/A	#N/A	#N/A
ATP5MC2	#N/A	#N/A	#N/A		#N/A	#N/A	#N/A
ATP5MC3	#N/A	#N/A	#N/A		#N/A	#N/A	#N/A
ATP5MD	#N/A	#N/A	#N/A		#N/A	#N/A	#N/A
ATP5MF	#N/A	#N/A	#N/A		#N/A	#N/A	#N/A
ATP5MG	#N/A	#N/A	#N/A		#N/A	#N/A	#N/A
ATP5MPL	#N/A	#N/A	#N/A		#N/A	#N/A	#N/A
ATP5PB	#N/A	#N/A	#N/A		#N/A	#N/A	#N/A
ATP6AP1	#N/A	#N/A	#N/A		#N/A	#N/A	#N/A
ATP6AP1L	#N/A	#N/A	#N/A		#N/A	#N/A	#N/A
ATP6AP2	#N/A	#N/A	#N/A		#N/A	#N/A	#N/A
ATP6V0A1	#N/A	#N/A	#N/A		#N/A	#N/A	#N/A
ATP6V0A2	#N/A	#N/A	#N/A		#N/A	#N/A	#N/A
ATP6V0A4	#N/A	#N/A	#N/A		#N/A	#N/A	#N/A
ATP6V0B	#N/A	#N/A	#N/A		#N/A	#N/A	#N/A
ATP6V0C	#N/A	#N/A	#N/A		#N/A	#N/A	#N/A
ATP6V0E1	#N/A	#N/A	#N/A		#N/A	#N/A	#N/A
ATP6V0E2	#N/A	#N/A	#N/A		#N/A	#N/A	Atp6v0e2
ATP7A	#N/A	#N/A	#N/A		#N/A	#N/A	#N/A
ATP7B	#N/A	#N/A	#N/A		#N/A	#N/A	#N/A
ATP8A1	#N/A	#N/A	#N/A		#N/A	#N/A	#N/A
ATP8A2	#N/A	#N/A	#N/A		#N/A	#N/A	#N/A
ATP8B1	#N/A	#N/A	#N/A		#N/A	#N/A	#N/A
ATP8B2	#N/A	#N/A	#N/A		#N/A	#N/A	#N/A
ATP8B3	#N/A	#N/A	#N/A		#N/A	#N/A	#N/A
ATP8B4	#N/A	#N/A	Atp8b4		#N/A	#N/A	#N/A
ATP9A	#N/A	#N/A	#N/A		#N/A	#N/A	#N/A
ATP9B	#N/A	#N/A	#N/A		#N/A	#N/A	#N/A
ATR	#N/A	#N/A	#N/A		#N/A	#N/A	#N/A
ATRAID	#N/A	#N/A	#N/A		#N/A	#N/A	#N/A
ATRN	#N/A	#N/A	#N/A		#N/A	#N/A	#N/A
ATRNL1	#N/A	#N/A	#N/A		#N/A	#N/A	#N/A
ATXN3	#N/A	#N/A	#N/A		#N/A	#N/A	#N/A
AUP1	#N/A	#N/A	#N/A		#N/A	#N/A	#N/A
AVL9	#N/A	#N/A	#N/A		#N/A	#N/A	#N/A
AVPR1A	#N/A	#N/A	#N/A		#N/A	#N/A	#N/A
AVPR1B	#N/A	#N/A	#N/A		#N/A	#N/A	#N/A
AVPR2	#N/A	#N/A	#N/A		#N/A	#N/A	#N/A
AWAT1	#N/A	#N/A	#N/A		#N/A	#N/A	#N/A
AWAT2	#N/A	#N/A	#N/A		#N/A	#N/A	#N/A
AXL	#N/A	#N/A	#N/A		#N/A	#N/A	#N/A
B3GALT2	B3galt2	B3galt2	#N/A		#N/A	#N/A	#N/A
B3GAT2	#N/A	#N/A	#N/A		#N/A	#N/A	#N/A
B3GNT10	#N/A	#N/A	#N/A		#N/A	#N/A	#N/A
B3GNT2	#N/A	#N/A	#N/A		#N/A	#N/A	#N/A
B4GALNT2	B4galnt2	B4galnt2	#N/A		#N/A	#N/A	#N/A
B4GALT1	#N/A	#N/A	B4galt1		#N/A	#N/A	#N/A
B4GALT2	#N/A	#N/A	#N/A		#N/A	#N/A	#N/A
BACE1	#N/A	#N/A	#N/A		#N/A	#N/A	#N/A
BACE2	Bace2	Bace2	#N/A		#N/A	#N/A	#N/A
BAK1	#N/A	#N/A	Bak1		#N/A	#N/A	#N/A
BAMBI	#N/A	#N/A	#N/A		#N/A	#N/A	#N/A
BCAM	#N/A	#N/A	#N/A		#N/A	#N/A	#N/A
BCAP29	#N/A	#N/A	#N/A		#N/A	#N/A	#N/A
BCAP31	#N/A	#N/A	#N/A		#N/A	#N/A	#N/A
BCL2	#N/A	#N/A	#N/A		#N/A	#N/A	#N/A
BCL2L1	#N/A	#N/A	#N/A		#N/A	#N/A	#N/A
BCL2L10	#N/A	#N/A	#N/A		#N/A	#N/A	#N/A
BCL2L13	#N/A	#N/A	#N/A		#N/A	#N/A	#N/A
BCL2L2	#N/A	#N/A	#N/A		#N/A	#N/A	#N/A
BCS1L	#N/A	#N/A	#N/A		#N/A	#N/A	#N/A
BDKRB1	#N/A	#N/A	#N/A		#N/A	#N/A	#N/A
BDKRB2	#N/A	#N/A	#N/A		#N/A	#N/A	#N/A
BDNF	#N/A	#N/A	#N/A		#N/A	#N/A	#N/A
BEAN1	#N/A	#N/A	#N/A		#N/A	#N/A	#N/A
BEST1	#N/A	#N/A	#N/A		#N/A	#N/A	#N/A
BEST2	Best2	Best2	Best2		#N/A	#N/A	#N/A
BEST3	#N/A	#N/A	#N/A		#N/A	#N/A	#N/A
BEST4	#N/A	#N/A	#N/A		#N/A	#N/A	#N/A
BET1	#N/A	#N/A	#N/A		#N/A	#N/A	#N/A
BET1L	#N/A	#N/A	#N/A		#N/A	#N/A	#N/A
BFAR	#N/A	#N/A	#N/A		#N/A	#N/A	#N/A
BIK	#N/A	#N/A	#N/A		#N/A	#N/A	#N/A
BMPR1A	#N/A	#N/A	#N/A		#N/A	#N/A	#N/A
BMPR1B	#N/A	#N/A	#N/A		#N/A	Bmpr1b	Bmpr1b
BMPR2	#N/A	#N/A	#N/A		#N/A	#N/A	#N/A
BMT2	#N/A	#N/A	#N/A		#N/A	#N/A	#N/A
BNIP1	#N/A	#N/A	#N/A		#N/A	#N/A	#N/A
BNIP2	#N/A	#N/A	#N/A		#N/A	#N/A	#N/A
BNIP3	#N/A	#N/A	#N/A		#N/A	#N/A	#N/A
BNIP3L	#N/A	#N/A	#N/A		#N/A	#N/A	#N/A
BNIPL	#N/A	#N/A	#N/A		#N/A	#N/A	#N/A
BOC	#N/A	#N/A	#N/A		#N/A	#N/A	#N/A
BOK	#N/A	#N/A	Bok		#N/A	#N/A	#N/A
BRI3	#N/A	#N/A	#N/A		#N/A	#N/A	#N/A
BRI3BP	#N/A	#N/A	#N/A		#N/A	#N/A	#N/A
BRICD5	#N/A	#N/A	#N/A		#N/A	#N/A	#N/A
BRS3	#N/A	#N/A	#N/A		#N/A	#N/A	#N/A
BRSK1	#N/A	#N/A	#N/A		#N/A	#N/A	#N/A
BRSK2	#N/A	#N/A	#N/A		#N/A	#N/A	Brsk2
BSCL2	#N/A	#N/A	#N/A		#N/A	#N/A	#N/A
BSG	Bsg	Bsg	#N/A		#N/A	#N/A	#N/A
BSND	#N/A	#N/A	#N/A		#N/A	#N/A	Bsnd
BST2	#N/A	#N/A	Bst2		#N/A	#N/A	#N/A
BTC	Btc	Btc	Btc		#N/A	#N/A	#N/A
BTLA	#N/A	#N/A	#N/A		#N/A	#N/A	#N/A
BTN1A1	#N/A	#N/A	#N/A		#N/A	#N/A	#N/A
BTN2A1	#N/A	#N/A	#N/A		#N/A	#N/A	#N/A
BTN2A2	#N/A	#N/A	#N/A		#N/A	#N/A	#N/A
BTN3A1	#N/A	#N/A	#N/A		#N/A	#N/A	#N/A
BTN3A2	#N/A	#N/A	#N/A		#N/A	#N/A	#N/A
BTN3A3	#N/A	#N/A	#N/A		#N/A	#N/A	#N/A
BTNL2	#N/A	#N/A	#N/A		#N/A	#N/A	#N/A
BTNL3	#N/A	#N/A	#N/A		#N/A	#N/A	#N/A
BTNL8	#N/A	#N/A	#N/A		#N/A	#N/A	#N/A
BTNL9	#N/A	#N/A	#N/A		#N/A	#N/A	#N/A
BVES	#N/A	#N/A	#N/A		Bves	Bves	#N/A
BX255925.3	#N/A	#N/A	#N/A		#N/A	#N/A	#N/A
C10orf128	#N/A	#N/A	#N/A		#N/A	#N/A	#N/A
C11orf24	#N/A	#N/A	#N/A		#N/A	#N/A	#N/A
C11orf87	#N/A	#N/A	#N/A		#N/A	#N/A	#N/A
C12orf76	#N/A	#N/A	#N/A		#N/A	#N/A	#N/A
C14orf132	#N/A	#N/A	#N/A		#N/A	#N/A	#N/A
C14orf180	#N/A	#N/A	#N/A		#N/A	#N/A	#N/A
C14orf37	#N/A	#N/A	#N/A		#N/A	#N/A	#N/A
C16orf54	#N/A	#N/A	#N/A		#N/A	#N/A	#N/A
C16orf58	#N/A	#N/A	#N/A		#N/A	#N/A	#N/A
C16orf91	#N/A	#N/A	#N/A		#N/A	#N/A	#N/A
C16orf92	#N/A	#N/A	#N/A		#N/A	#N/A	#N/A
C17orf113	#N/A	#N/A	#N/A		#N/A	#N/A	#N/A
C17orf62	#N/A	#N/A	#N/A		#N/A	#N/A	#N/A
C17orf78	#N/A	#N/A	#N/A		#N/A	#N/A	#N/A
C17orf80	#N/A	#N/A	#N/A		#N/A	#N/A	#N/A
C18orf32	#N/A	#N/A	#N/A		#N/A	#N/A	#N/A
C19orf18	#N/A	#N/A	#N/A		#N/A	#N/A	#N/A
C19orf24	#N/A	#N/A	#N/A		#N/A	#N/A	#N/A
C19orf38	#N/A	#N/A	#N/A		#N/A	#N/A	#N/A
C1GALT1C1	#N/A	#N/A	#N/A		#N/A	#N/A	#N/A
C1GALT1C1L	#N/A	#N/A	#N/A		#N/A	#N/A	#N/A
C1orf159	#N/A	#N/A	#N/A		#N/A	#N/A	#N/A
C1orf162	#N/A	#N/A	#N/A		#N/A	#N/A	#N/A
C1orf185	#N/A	#N/A	#N/A		#N/A	#N/A	#N/A
C1orf210	#N/A	#N/A	#N/A		#N/A	#N/A	#N/A
C1orf43	#N/A	#N/A	#N/A		#N/A	#N/A	#N/A
C20orf141	#N/A	#N/A	#N/A		#N/A	#N/A	#N/A
C20orf24	#N/A	#N/A	#N/A		#N/A	#N/A	#N/A
C2CD2L	#N/A	#N/A	#N/A		#N/A	#N/A	#N/A
C2orf16	#N/A	#N/A	#N/A		#N/A	#N/A	#N/A
C2orf74	#N/A	#N/A	#N/A		#N/A	#N/A	#N/A
C2orf83	#N/A	#N/A	#N/A		#N/A	#N/A	#N/A
C2orf92	#N/A	#N/A	#N/A		#N/A	#N/A	#N/A
C3AR1	#N/A	#N/A	#N/A		#N/A	#N/A	#N/A
C3orf18	#N/A	#N/A	#N/A		#N/A	#N/A	#N/A
C3orf52	#N/A	#N/A	#N/A		#N/A	#N/A	#N/A
C3orf80	#N/A	#N/A	#N/A		#N/A	#N/A	#N/A
C4orf3	#N/A	#N/A	#N/A		#N/A	#N/A	#N/A
C5AR1	#N/A	#N/A	#N/A		#N/A	#N/A	#N/A
C5AR2	#N/A	#N/A	C5ar2		#N/A	#N/A	#N/A
C5orf15	#N/A	#N/A	#N/A		#N/A	#N/A	#N/A
C5orf42	#N/A	#N/A	#N/A		#N/A	#N/A	#N/A
C5orf60	#N/A	#N/A	#N/A		#N/A	#N/A	#N/A
C6orf10	#N/A	#N/A	#N/A		#N/A	#N/A	#N/A
C6orf136	#N/A	#N/A	#N/A		#N/A	#N/A	#N/A
C6orf47	#N/A	#N/A	#N/A		#N/A	#N/A	#N/A
C6orf89	#N/A	#N/A	#N/A		#N/A	#N/A	#N/A
C9orf57	#N/A	#N/A	#N/A		#N/A	#N/A	#N/A
C9orf84	#N/A	#N/A	#N/A		#N/A	#N/A	#N/A
C9orf92	#N/A	#N/A	#N/A		#N/A	#N/A	#N/A
CA12	#N/A	#N/A	#N/A		#N/A	#N/A	#N/A
CA14	#N/A	#N/A	#N/A		#N/A	#N/A	#N/A
CA4	#N/A	#N/A	#N/A		#N/A	#N/A	#N/A
CA9	#N/A	#N/A	#N/A		#N/A	#N/A	#N/A
CABLES2	#N/A	#N/A	#N/A		#N/A	#N/A	#N/A
CABP7	#N/A	#N/A	#N/A		#N/A	#N/A	#N/A
CACFD1	#N/A	#N/A	#N/A		#N/A	#N/A	#N/A
CACHD1	#N/A	#N/A	#N/A		#N/A	#N/A	#N/A
CACNA1A	#N/A	#N/A	#N/A		#N/A	#N/A	#N/A
CACNA1B	#N/A	#N/A	#N/A		#N/A	#N/A	#N/A
CACNA1C	#N/A	#N/A	#N/A		Cacna1c	Cacna1c	#N/A
CACNA1D	#N/A	#N/A	#N/A		#N/A	#N/A	#N/A
CACNA1E	#N/A	#N/A	#N/A		#N/A	#N/A	#N/A
CACNA1F	#N/A	#N/A	#N/A		#N/A	#N/A	#N/A
CACNA1G	#N/A	#N/A	#N/A		#N/A	#N/A	#N/A
CACNA1H	#N/A	#N/A	#N/A		#N/A	#N/A	#N/A
CACNA1I	#N/A	#N/A	#N/A		#N/A	#N/A	#N/A
CACNA1S	#N/A	#N/A	#N/A		#N/A	#N/A	#N/A
CACNA2D1	#N/A	#N/A	#N/A		Cacna2d1	Cacna2d1	#N/A
CACNA2D3	#N/A	#N/A	#N/A		#N/A	#N/A	#N/A
CACNA2D4	Cacna2d4	Cacna2d4	#N/A		#N/A	#N/A	#N/A
CACNB4	#N/A	#N/A	#N/A		Cacnb4	Cacnb4	Cacnb4
CACNG1	#N/A	#N/A	#N/A		#N/A	#N/A	#N/A
CACNG2	#N/A	#N/A	#N/A		#N/A	#N/A	#N/A
CACNG3	#N/A	#N/A	#N/A		#N/A	#N/A	#N/A
CACNG4	#N/A	#N/A	#N/A		#N/A	#N/A	#N/A
CACNG5	#N/A	#N/A	#N/A		#N/A	#N/A	#N/A
CACNG6	#N/A	#N/A	#N/A		#N/A	#N/A	#N/A
CACNG7	#N/A	#N/A	#N/A		#N/A	#N/A	#N/A
CACNG8	#N/A	#N/A	#N/A		#N/A	#N/A	#N/A
CADM1	Cadm1	Cadm1	#N/A		#N/A	#N/A	#N/A
CADM2	#N/A	#N/A	#N/A		#N/A	#N/A	Cadm2
CADM3	#N/A	#N/A	#N/A		#N/A	#N/A	#N/A
CADM4	#N/A	#N/A	Cadm4		#N/A	#N/A	#N/A
CALCR	#N/A	#N/A	#N/A		#N/A	#N/A	#N/A
CALCRL	#N/A	#N/A	#N/A		#N/A	#N/A	#N/A
CALHM1	#N/A	#N/A	#N/A		#N/A	#N/A	#N/A
CALHM2	#N/A	#N/A	#N/A		#N/A	#N/A	#N/A
CALHM3	#N/A	#N/A	#N/A		#N/A	#N/A	#N/A
CALHM4	#N/A	#N/A	#N/A		#N/A	#N/A	#N/A
CALHM5	#N/A	#N/A	#N/A		#N/A	#N/A	#N/A
CALHM6	#N/A	#N/A	#N/A		#N/A	#N/A	#N/A
CALN1	#N/A	#N/A	#N/A		#N/A	Caln1	#N/A
CALY	#N/A	#N/A	#N/A		#N/A	#N/A	#N/A
CAMK1	#N/A	#N/A	#N/A		#N/A	#N/A	#N/A
CAMK1D	Camk1d	Camk1d	#N/A		#N/A	#N/A	#N/A
CAMK1G	#N/A	#N/A	#N/A		#N/A	#N/A	#N/A
CAMK2A	#N/A	#N/A	#N/A		#N/A	#N/A	#N/A
CAMK2B	#N/A	#N/A	#N/A		#N/A	#N/A	#N/A
CAMK2D	#N/A	#N/A	#N/A		#N/A	#N/A	#N/A
CAMK2G	#N/A	#N/A	#N/A		#N/A	Camk2g	#N/A
CAMK4	#N/A	#N/A	#N/A		#N/A	Camk4	#N/A
CAMKK2	#N/A	#N/A	#N/A		#N/A	#N/A	#N/A
CAMLG	#N/A	#N/A	#N/A		#N/A	#N/A	#N/A
CANT1	#N/A	#N/A	#N/A		#N/A	#N/A	#N/A
CANX	#N/A	#N/A	#N/A		#N/A	#N/A	#N/A
CARD19	#N/A	#N/A	#N/A		#N/A	#N/A	#N/A
CASD1	#N/A	Casd1	#N/A		#N/A	#N/A	#N/A
CASK	#N/A	#N/A	#N/A		#N/A	#N/A	#N/A
CASR	#N/A	#N/A	#N/A		#N/A	#N/A	#N/A
CATSPER1	#N/A	#N/A	#N/A		#N/A	#N/A	#N/A
CATSPER2	#N/A	#N/A	#N/A		#N/A	#N/A	#N/A
CATSPER3	#N/A	#N/A	#N/A		#N/A	#N/A	#N/A
CATSPER4	Catsper4	Catsper4	#N/A		#N/A	#N/A	#N/A
CATSPERB	#N/A	#N/A	#N/A		#N/A	#N/A	#N/A
CATSPERD	Catsperd	Catsperd	#N/A		#N/A	#N/A	#N/A
CATSPERE	#N/A	#N/A	#N/A		#N/A	#N/A	#N/A
CATSPERG	#N/A	#N/A	#N/A		#N/A	#N/A	#N/A
CAV1	#N/A	#N/A	#N/A		Cav1	Cav1	#N/A
CAV2	#N/A	#N/A	#N/A		#N/A	#N/A	#N/A
CAV3	#N/A	#N/A	#N/A		#N/A	#N/A	#N/A
CBARP	#N/A	#N/A	#N/A		#N/A	#N/A	#N/A
CCDC107	#N/A	#N/A	#N/A		#N/A	#N/A	#N/A
CCDC136	#N/A	#N/A	#N/A		#N/A	Ccdc136	#N/A
CCDC141	#N/A	#N/A	#N/A		Ccdc141	#N/A	#N/A
CCDC144A	#N/A	#N/A	#N/A		#N/A	#N/A	#N/A
CCDC155	#N/A	#N/A	#N/A		#N/A	#N/A	#N/A
CCDC163	#N/A	#N/A	#N/A		#N/A	#N/A	#N/A
CCDC167	#N/A	#N/A	#N/A		#N/A	#N/A	#N/A
CCDC168	#N/A	#N/A	#N/A		#N/A	#N/A	#N/A
CCDC188	#N/A	#N/A	#N/A		#N/A	#N/A	#N/A
CCDC47	#N/A	#N/A	#N/A		#N/A	#N/A	#N/A
CCDC51	#N/A	#N/A	#N/A		#N/A	#N/A	#N/A
CCDC90B	#N/A	#N/A	#N/A		#N/A	#N/A	#N/A
CCKAR	#N/A	#N/A	#N/A		#N/A	#N/A	#N/A
CCKBR	#N/A	#N/A	#N/A		#N/A	#N/A	#N/A
CCL5	#N/A	#N/A	Ccl5		#N/A	#N/A	#N/A
CCL7	#N/A	#N/A	Ccl7		#N/A	#N/A	#N/A
CCPG1	#N/A	#N/A	#N/A		#N/A	#N/A	#N/A
CCR1	#N/A	#N/A	Ccr1		#N/A	#N/A	#N/A
CCR10	#N/A	#N/A	#N/A		#N/A	#N/A	#N/A
CCR2	#N/A	#N/A	Ccr2		#N/A	#N/A	#N/A
CCR3	#N/A	#N/A	#N/A		#N/A	#N/A	#N/A
CCR4	#N/A	#N/A	#N/A		#N/A	#N/A	#N/A
CCR5	#N/A	#N/A	Ccr5		#N/A	#N/A	#N/A
CCR6	#N/A	#N/A	#N/A		#N/A	#N/A	#N/A
CCR7	#N/A	#N/A	Ccr7		#N/A	#N/A	#N/A
CCR8	#N/A	#N/A	#N/A		#N/A	#N/A	#N/A
CCR9	#N/A	#N/A	#N/A		#N/A	#N/A	#N/A
CCRL2	#N/A	#N/A	#N/A		#N/A	#N/A	#N/A
CD101	#N/A	#N/A	Cd101		#N/A	#N/A	#N/A
CD109	#N/A	#N/A	#N/A		#N/A	#N/A	#N/A
CD151	#N/A	#N/A	#N/A		#N/A	#N/A	#N/A
CD163	#N/A	#N/A	#N/A		#N/A	#N/A	Cd163
CD163L1	#N/A	#N/A	#N/A		#N/A	#N/A	#N/A
CD164	#N/A	#N/A	#N/A		#N/A	#N/A	#N/A
CD164L2	#N/A	#N/A	#N/A		#N/A	#N/A	Cd164l2
CD180	#N/A	#N/A	#N/A		#N/A	#N/A	#N/A
CD19	#N/A	#N/A	#N/A		#N/A	#N/A	#N/A
CD1A	#N/A	#N/A	#N/A		#N/A	#N/A	#N/A
CD1B	#N/A	#N/A	#N/A		#N/A	#N/A	#N/A
CD1C	#N/A	#N/A	#N/A		#N/A	#N/A	#N/A
CD1D	#N/A	#N/A	#N/A		#N/A	#N/A	#N/A
CD1E	#N/A	#N/A	#N/A		#N/A	#N/A	#N/A
CD2	#N/A	#N/A	#N/A		#N/A	#N/A	#N/A
CD200	#N/A	#N/A	#N/A		#N/A	#N/A	#N/A
CD200R1	#N/A	#N/A	#N/A		#N/A	#N/A	#N/A
CD200R1L	#N/A	#N/A	#N/A		#N/A	#N/A	#N/A
CD207	#N/A	#N/A	#N/A		#N/A	#N/A	#N/A
CD209	#N/A	#N/A	#N/A		#N/A	#N/A	#N/A
CD22	#N/A	#N/A	#N/A		#N/A	#N/A	#N/A
CD226	#N/A	#N/A	#N/A		#N/A	#N/A	#N/A
CD244	#N/A	#N/A	Cd244		#N/A	#N/A	#N/A
CD247	#N/A	#N/A	#N/A		#N/A	#N/A	#N/A
CD248	#N/A	#N/A	#N/A		#N/A	#N/A	#N/A
CD27	#N/A	#N/A	#N/A		#N/A	#N/A	#N/A
CD274	#N/A	#N/A	#N/A		#N/A	#N/A	#N/A
CD276	Cd276	Cd276	Cd276		#N/A	#N/A	#N/A
CD28	#N/A	#N/A	#N/A		Cd28	Cd28	#N/A
CD300A	#N/A	#N/A	#N/A		#N/A	#N/A	#N/A
CD300C	#N/A	#N/A	#N/A		#N/A	#N/A	#N/A
CD300E	#N/A	#N/A	#N/A		#N/A	#N/A	#N/A
CD300LB	#N/A	#N/A	#N/A		#N/A	#N/A	#N/A
CD300LD	#N/A	#N/A	#N/A		#N/A	#N/A	#N/A
CD300LF	#N/A	#N/A	Cd300lf		#N/A	#N/A	#N/A
CD300LG	#N/A	#N/A	#N/A		#N/A	#N/A	#N/A
CD302	#N/A	#N/A	#N/A		#N/A	#N/A	#N/A
CD320	#N/A	#N/A	#N/A		#N/A	#N/A	#N/A
CD33	#N/A	#N/A	#N/A		#N/A	#N/A	#N/A
CD34	#N/A	#N/A	#N/A		#N/A	#N/A	#N/A
CD36	#N/A	#N/A	#N/A		#N/A	#N/A	#N/A
CD37	#N/A	#N/A	#N/A		#N/A	#N/A	#N/A
CD3D	#N/A	#N/A	#N/A		#N/A	#N/A	#N/A
CD3E	#N/A	#N/A	#N/A		#N/A	#N/A	#N/A
CD3G	#N/A	#N/A	Cd3g		#N/A	#N/A	#N/A
CD4	#N/A	#N/A	#N/A		#N/A	#N/A	#N/A
CD40	#N/A	#N/A	#N/A		#N/A	#N/A	#N/A
CD40LG	#N/A	#N/A	#N/A		#N/A	#N/A	#N/A
CD44	#N/A	Cd44	Cd44		#N/A	#N/A	#N/A
CD46	#N/A	#N/A	#N/A		#N/A	#N/A	#N/A
CD47	#N/A	#N/A	#N/A		#N/A	#N/A	#N/A
CD48	#N/A	#N/A	#N/A		#N/A	#N/A	#N/A
CD5	#N/A	#N/A	#N/A		#N/A	#N/A	#N/A
CD52	#N/A	#N/A	#N/A		Cd52	Cd52	Cd52
CD53	#N/A	#N/A	#N/A		#N/A	#N/A	#N/A
CD55	#N/A	#N/A	#N/A		#N/A	#N/A	#N/A
CD58	#N/A	#N/A	#N/A		#N/A	#N/A	#N/A
CD59	#N/A	#N/A	#N/A		#N/A	#N/A	#N/A
CD6	#N/A	#N/A	#N/A		#N/A	#N/A	#N/A
CD63	#N/A	#N/A	Cd63		#N/A	#N/A	#N/A
CD68	#N/A	#N/A	#N/A		#N/A	#N/A	#N/A
CD69	#N/A	#N/A	Cd69		#N/A	#N/A	#N/A
CD7	#N/A	#N/A	#N/A		#N/A	#N/A	#N/A
CD70	#N/A	#N/A	#N/A		#N/A	#N/A	#N/A
CD72	#N/A	#N/A	Cd72		#N/A	#N/A	#N/A
CD74	#N/A	#N/A	Cd74		#N/A	#N/A	#N/A
CD79A	#N/A	#N/A	#N/A		#N/A	#N/A	#N/A
CD79B	#N/A	#N/A	#N/A		#N/A	#N/A	#N/A
CD80	#N/A	#N/A	#N/A		#N/A	#N/A	#N/A
CD81	#N/A	#N/A	#N/A		#N/A	#N/A	#N/A
CD82	#N/A	#N/A	#N/A		#N/A	#N/A	#N/A
CD83	#N/A	#N/A	Cd83		#N/A	#N/A	#N/A
CD84	#N/A	#N/A	#N/A		#N/A	#N/A	#N/A
CD86	#N/A	#N/A	Cd86		#N/A	#N/A	#N/A
CD8A	#N/A	#N/A	Cd8a		#N/A	#N/A	#N/A
CD8B	#N/A	#N/A	#N/A		#N/A	#N/A	#N/A
CD8B2	#N/A	#N/A	#N/A		#N/A	#N/A	#N/A
CD9	#N/A	#N/A	#N/A		#N/A	#N/A	#N/A
CD93	#N/A	#N/A	Cd93		#N/A	#N/A	#N/A
CD96	#N/A	#N/A	Cd96		#N/A	#N/A	#N/A
CD99	#N/A	#N/A	#N/A		#N/A	#N/A	#N/A
CD99L2	#N/A	#N/A	#N/A		#N/A	#N/A	#N/A
CDAN1	#N/A	#N/A	#N/A		#N/A	#N/A	#N/A
CDC14B	#N/A	#N/A	#N/A		#N/A	#N/A	#N/A
CDCP1	#N/A	#N/A	#N/A		#N/A	#N/A	#N/A
CDCP2	#N/A	#N/A	#N/A		#N/A	#N/A	#N/A
CDH1	Cdh1	Cdh1	#N/A		#N/A	#N/A	#N/A
CDH10	#N/A	#N/A	#N/A		#N/A	#N/A	#N/A
CDH11	#N/A	#N/A	Cdh11		#N/A	#N/A	#N/A
CDH12	#N/A	#N/A	#N/A		#N/A	#N/A	#N/A
CDH15	#N/A	#N/A	#N/A		#N/A	#N/A	#N/A
CDH16	#N/A	#N/A	#N/A		#N/A	#N/A	#N/A
CDH17	Cdh17	Cdh17	Cdh17		#N/A	#N/A	#N/A
CDH18	#N/A	#N/A	#N/A		#N/A	#N/A	#N/A
CDH19	#N/A	#N/A	#N/A		Cdh19	Cdh19	Cdh19
CDH2	#N/A	#N/A	#N/A		#N/A	#N/A	#N/A
CDH20	#N/A	#N/A	#N/A		#N/A	#N/A	#N/A
CDH22	#N/A	#N/A	#N/A		#N/A	#N/A	#N/A
CDH23	#N/A	#N/A	#N/A		#N/A	#N/A	#N/A
CDH24	Cdh24	Cdh24	Cdh24		#N/A	#N/A	#N/A
CDH26	#N/A	#N/A	#N/A		#N/A	#N/A	#N/A
CDH3	#N/A	#N/A	Cdh3		#N/A	#N/A	#N/A
CDH4	#N/A	#N/A	#N/A		#N/A	#N/A	#N/A
CDH5	#N/A	#N/A	#N/A		#N/A	#N/A	#N/A
CDH6	#N/A	#N/A	#N/A		#N/A	#N/A	#N/A
CDH7	#N/A	#N/A	#N/A		#N/A	#N/A	#N/A
CDH8	#N/A	#N/A	#N/A		Cdh8	Cdh8	#N/A
CDH9	#N/A	#N/A	#N/A		#N/A	#N/A	#N/A
CDHR1	#N/A	Cdhr1	#N/A		#N/A	#N/A	#N/A
CDHR2	#N/A	#N/A	Cdhr2		#N/A	#N/A	#N/A
CDHR3	#N/A	#N/A	#N/A		#N/A	#N/A	#N/A
CDHR4	#N/A	#N/A	#N/A		#N/A	#N/A	#N/A
CDHR5	#N/A	Cdhr5	Cdhr5		#N/A	#N/A	#N/A
CDIP1	#N/A	#N/A	#N/A		#N/A	#N/A	#N/A
CDIPT	#N/A	#N/A	#N/A		#N/A	#N/A	#N/A
CDKAL1	#N/A	#N/A	#N/A		#N/A	#N/A	#N/A
CDON	#N/A	#N/A	#N/A		#N/A	#N/A	#N/A
CDRT15L2	#N/A	#N/A	#N/A		#N/A	#N/A	#N/A
CDS1	#N/A	#N/A	#N/A		#N/A	#N/A	Cds1
CDS2	#N/A	#N/A	#N/A		#N/A	#N/A	#N/A
CEACAM1	#N/A	#N/A	#N/A		#N/A	#N/A	#N/A
CEACAM19	#N/A	#N/A	#N/A		#N/A	#N/A	#N/A
CEACAM20	#N/A	#N/A	#N/A		#N/A	#N/A	#N/A
CEACAM21	#N/A	#N/A	#N/A		#N/A	#N/A	#N/A
CEACAM3	#N/A	#N/A	#N/A		#N/A	#N/A	#N/A
CEACAM4	#N/A	#N/A	#N/A		#N/A	#N/A	#N/A
CEACAM6	#N/A	#N/A	#N/A		#N/A	#N/A	#N/A
CEACAM7	#N/A	#N/A	#N/A		#N/A	#N/A	#N/A
CEBPZOS	#N/A	#N/A	#N/A		#N/A	#N/A	#N/A
CELSR1	Celsr1	Celsr1	Celsr1		#N/A	#N/A	#N/A
CELSR2	#N/A	Celsr2	#N/A		#N/A	#N/A	#N/A
CELSR3	#N/A	#N/A	#N/A		#N/A	#N/A	#N/A
CEND1	#N/A	#N/A	#N/A		#N/A	#N/A	#N/A
CEP170	#N/A	#N/A	#N/A		#N/A	#N/A	#N/A
CEP95	#N/A	#N/A	#N/A		#N/A	#N/A	#N/A
CEPT1	#N/A	#N/A	#N/A		#N/A	#N/A	#N/A
CERS1	#N/A	#N/A	#N/A		#N/A	#N/A	#N/A
CERS2	#N/A	#N/A	#N/A		#N/A	#N/A	#N/A
CERS3	#N/A	#N/A	#N/A		#N/A	#N/A	#N/A
CERS4	#N/A	#N/A	#N/A		#N/A	#N/A	#N/A
CERS5	#N/A	#N/A	#N/A		#N/A	#N/A	#N/A
CERS6	#N/A	#N/A	#N/A		#N/A	#N/A	#N/A
CES2	#N/A	#N/A	#N/A		#N/A	#N/A	#N/A
CFAP46	#N/A	#N/A	#N/A		#N/A	#N/A	#N/A
CFAP47	#N/A	#N/A	#N/A		#N/A	#N/A	#N/A
CFAP54	#N/A	#N/A	#N/A		#N/A	#N/A	#N/A
CFAP57	#N/A	#N/A	#N/A		#N/A	#N/A	#N/A
CFAP61	#N/A	#N/A	#N/A		#N/A	#N/A	#N/A
CFTR	Cftr	Cftr	Cftr		#N/A	#N/A	#N/A
CGRRF1	#N/A	#N/A	#N/A		#N/A	#N/A	#N/A
CH25H	#N/A	Ch25h	Ch25h		#N/A	#N/A	#N/A
CHEK2	#N/A	#N/A	#N/A		#N/A	#N/A	#N/A
CHIC1	#N/A	#N/A	#N/A		#N/A	#N/A	#N/A
CHIC2	#N/A	#N/A	#N/A		#N/A	#N/A	#N/A
CHL1	Chl1	Chl1	#N/A		#N/A	#N/A	#N/A
CHML	#N/A	#N/A	#N/A		#N/A	#N/A	Chml
CHODL	Chodl	Chodl	Chodl		#N/A	#N/A	#N/A
CHPT1	#N/A	#N/A	#N/A		#N/A	#N/A	#N/A
CHRFAM7A	#N/A	#N/A	#N/A		#N/A	#N/A	#N/A
CHRM1	#N/A	#N/A	#N/A		#N/A	Chrm1	Chrm1
CHRM2	#N/A	#N/A	#N/A		Chrm2	Chrm2	Chrm2
CHRM3	#N/A	#N/A	#N/A		#N/A	#N/A	Chrm3
CHRM4	#N/A	#N/A	#N/A		#N/A	#N/A	#N/A
CHRM5	#N/A	#N/A	#N/A		#N/A	#N/A	#N/A
CHRNA1	#N/A	#N/A	#N/A		#N/A	#N/A	#N/A
CHRNA10	#N/A	#N/A	#N/A		#N/A	#N/A	#N/A
CHRNA2	#N/A	#N/A	#N/A		#N/A	#N/A	#N/A
CHRNA3	#N/A	#N/A	#N/A		#N/A	#N/A	Chrna3
CHRNA4	#N/A	#N/A	#N/A		#N/A	#N/A	Chrna4
CHRNA5	#N/A	#N/A	#N/A		#N/A	#N/A	#N/A
CHRNA6	#N/A	#N/A	#N/A		#N/A	#N/A	#N/A
CHRNA7	#N/A	#N/A	#N/A		Chrna7	Chrna7	#N/A
CHRNA9	#N/A	#N/A	#N/A		#N/A	#N/A	#N/A
CHRNB1	#N/A	#N/A	Chrnb1		#N/A	#N/A	#N/A
CHRNB2	#N/A	#N/A	#N/A		#N/A	#N/A	Chrnb2
CHRNB3	#N/A	#N/A	#N/A		#N/A	#N/A	#N/A
CHRNB4	#N/A	#N/A	#N/A		#N/A	#N/A	#N/A
CHRND	#N/A	#N/A	#N/A		#N/A	#N/A	#N/A
CHRNE	#N/A	#N/A	#N/A		#N/A	#N/A	#N/A
CHRNG	#N/A	#N/A	#N/A		#N/A	#N/A	#N/A
CHST10	#N/A	#N/A	#N/A		#N/A	Chst10	#N/A
CHST12	#N/A	#N/A	#N/A		#N/A	#N/A	#N/A
CHST14	#N/A	#N/A	#N/A		#N/A	#N/A	#N/A
CHST15	#N/A	#N/A	#N/A		#N/A	#N/A	#N/A
CHST2	#N/A	#N/A	#N/A		#N/A	#N/A	#N/A
CHST3	#N/A	#N/A	#N/A		#N/A	Chst3	#N/A
CHST5	#N/A	#N/A	#N/A		#N/A	#N/A	#N/A
CHST9	Chst9	Chst9	#N/A		#N/A	#N/A	#N/A
CIP2A	#N/A	#N/A	#N/A		#N/A	#N/A	#N/A
CISD1	#N/A	#N/A	#N/A		#N/A	#N/A	#N/A
CISD2	#N/A	#N/A	#N/A		#N/A	#N/A	#N/A
CKAP4	#N/A	#N/A	#N/A		#N/A	#N/A	#N/A
CKLF	#N/A	#N/A	#N/A		#N/A	#N/A	#N/A
CKLF-CMTM1	#N/A	#N/A	#N/A		#N/A	#N/A	#N/A
CLCA2	#N/A	#N/A	#N/A		#N/A	#N/A	#N/A
CLCA4	#N/A	#N/A	#N/A		#N/A	#N/A	#N/A
CLCC1	#N/A	#N/A	#N/A		#N/A	#N/A	#N/A
CLCN1	#N/A	#N/A	#N/A		#N/A	#N/A	#N/A
CLCN2	Clcn2	Clcn2	Clcn2		#N/A	#N/A	#N/A
CLCN3	#N/A	#N/A	#N/A		#N/A	#N/A	#N/A
CLCN4	#N/A	#N/A	#N/A		#N/A	#N/A	#N/A
CLCN5	#N/A	#N/A	#N/A		#N/A	#N/A	#N/A
CLCN6	#N/A	#N/A	#N/A		#N/A	#N/A	#N/A
CLCN7	#N/A	#N/A	#N/A		#N/A	#N/A	#N/A
CLCNKA	#N/A	#N/A	#N/A		#N/A	#N/A	#N/A
CLCNKB	#N/A	#N/A	#N/A		#N/A	#N/A	Clcnkb
CLDN1	#N/A	#N/A	#N/A		Cldn1	#N/A	#N/A
CLDN10	#N/A	Cldn10	Cldn10		#N/A	#N/A	#N/A
CLDN11	#N/A	#N/A	#N/A		#N/A	#N/A	#N/A
CLDN12	#N/A	#N/A	#N/A		#N/A	#N/A	#N/A
CLDN14	#N/A	#N/A	#N/A		#N/A	#N/A	#N/A
CLDN15	#N/A	#N/A	#N/A		#N/A	#N/A	#N/A
CLDN16	#N/A	#N/A	#N/A		#N/A	#N/A	#N/A
CLDN17	#N/A	#N/A	#N/A		#N/A	#N/A	#N/A
CLDN18	#N/A	#N/A	#N/A		#N/A	#N/A	#N/A
CLDN19	#N/A	#N/A	#N/A		#N/A	#N/A	#N/A
CLDN2	#N/A	#N/A	#N/A		#N/A	#N/A	#N/A
CLDN20	#N/A	#N/A	#N/A		#N/A	#N/A	#N/A
CLDN22	#N/A	#N/A	#N/A		#N/A	#N/A	#N/A
CLDN23	#N/A	#N/A	#N/A		#N/A	#N/A	#N/A
CLDN24	#N/A	#N/A	#N/A		#N/A	#N/A	#N/A
CLDN25	#N/A	#N/A	#N/A		#N/A	#N/A	#N/A
CLDN3	#N/A	#N/A	#N/A		#N/A	#N/A	#N/A
CLDN34	#N/A	#N/A	#N/A		#N/A	#N/A	#N/A
CLDN4	#N/A	#N/A	#N/A		#N/A	#N/A	#N/A
CLDN5	#N/A	#N/A	#N/A		#N/A	#N/A	#N/A
CLDN6	Cldn6	#N/A	#N/A		#N/A	#N/A	#N/A
CLDN7	#N/A	#N/A	#N/A		#N/A	#N/A	#N/A
CLDN8	#N/A	#N/A	#N/A		#N/A	#N/A	Cldn8
CLDN9	#N/A	#N/A	#N/A		#N/A	#N/A	#N/A
CLDND1	#N/A	#N/A	#N/A		#N/A	#N/A	#N/A
CLDND2	#N/A	#N/A	#N/A		#N/A	#N/A	#N/A
CLEC10A	#N/A	#N/A	#N/A		#N/A	#N/A	#N/A
CLEC12A	#N/A	#N/A	#N/A		#N/A	#N/A	#N/A
CLEC12B	#N/A	#N/A	#N/A		#N/A	#N/A	#N/A
CLEC14A	#N/A	#N/A	#N/A		#N/A	#N/A	#N/A
CLEC17A	#N/A	#N/A	#N/A		#N/A	#N/A	#N/A
CLEC1A	#N/A	#N/A	#N/A		#N/A	#N/A	#N/A
CLEC1B	#N/A	#N/A	#N/A		#N/A	#N/A	#N/A
CLEC2A	#N/A	#N/A	#N/A		#N/A	#N/A	#N/A
CLEC2D	#N/A	#N/A	#N/A		#N/A	#N/A	#N/A
CLEC2L	#N/A	#N/A	#N/A		#N/A	#N/A	#N/A
CLEC4A	#N/A	#N/A	#N/A		#N/A	#N/A	#N/A
CLEC4C	#N/A	#N/A	#N/A		#N/A	#N/A	#N/A
CLEC4E	#N/A	#N/A	Clec4e		#N/A	#N/A	#N/A
CLEC4F	#N/A	#N/A	#N/A		#N/A	#N/A	#N/A
CLEC4G	#N/A	#N/A	#N/A		#N/A	#N/A	#N/A
CLEC4M	#N/A	#N/A	#N/A		#N/A	#N/A	#N/A
CLEC5A	Clec5a	Clec5a	Clec5a		#N/A	#N/A	#N/A
CLEC6A	#N/A	#N/A	#N/A		#N/A	#N/A	#N/A
CLEC7A	#N/A	#N/A	#N/A		#N/A	#N/A	#N/A
CLEC9A	#N/A	#N/A	#N/A		#N/A	#N/A	#N/A
CLECL1	#N/A	#N/A	#N/A		#N/A	#N/A	#N/A
CLGN	#N/A	#N/A	#N/A		#N/A	#N/A	#N/A
CLK1	#N/A	#N/A	#N/A		#N/A	#N/A	#N/A
CLK4	#N/A	#N/A	#N/A		#N/A	#N/A	#N/A
CLMN	Clmn	Clmn	Clmn		#N/A	#N/A	#N/A
CLMP	#N/A	#N/A	#N/A		#N/A	#N/A	#N/A
CLN3	Cln3	Cln3	Cln3		#N/A	#N/A	#N/A
CLN5	#N/A	#N/A	#N/A		#N/A	#N/A	#N/A
CLN6	#N/A	#N/A	#N/A		#N/A	#N/A	#N/A
CLN8	#N/A	#N/A	#N/A		#N/A	#N/A	#N/A
CLPTM1	#N/A	#N/A	#N/A		#N/A	#N/A	#N/A
CLPTM1L	#N/A	#N/A	#N/A		#N/A	#N/A	#N/A
CLRN1	#N/A	#N/A	#N/A		#N/A	#N/A	#N/A
CLRN2	#N/A	#N/A	#N/A		#N/A	#N/A	#N/A
CLRN3	#N/A	#N/A	#N/A		#N/A	#N/A	#N/A
CLSTN1	#N/A	#N/A	#N/A		#N/A	#N/A	Clstn1
CLSTN2	#N/A	#N/A	#N/A		Clstn2	Clstn2	Clstn2
CLSTN3	#N/A	#N/A	#N/A		#N/A	#N/A	#N/A
CLTRN	#N/A	#N/A	#N/A		#N/A	#N/A	#N/A
CLYBL	#N/A	#N/A	#N/A		#N/A	#N/A	#N/A
CMKLR1	#N/A	#N/A	#N/A		#N/A	#N/A	#N/A
CMTM1	#N/A	#N/A	#N/A		#N/A	#N/A	#N/A
CMTM2	#N/A	#N/A	#N/A		#N/A	#N/A	#N/A
CMTM3	#N/A	#N/A	Cmtm3		#N/A	#N/A	#N/A
CMTM4	#N/A	#N/A	#N/A		#N/A	#N/A	Cmtm4
CMTM5	#N/A	#N/A	#N/A		#N/A	#N/A	#N/A
CMTM6	#N/A	#N/A	#N/A		#N/A	#N/A	#N/A
CMTM7	#N/A	#N/A	#N/A		#N/A	#N/A	#N/A
CMTM8	#N/A	#N/A	#N/A		#N/A	#N/A	#N/A
CMTR2	#N/A	#N/A	#N/A		#N/A	#N/A	#N/A
CNEP1R1	#N/A	#N/A	#N/A		#N/A	#N/A	#N/A
CNGA1	#N/A	#N/A	#N/A		#N/A	#N/A	#N/A
CNGA2	#N/A	#N/A	#N/A		#N/A	#N/A	#N/A
CNGA3	#N/A	#N/A	#N/A		#N/A	#N/A	#N/A
CNGA4	#N/A	#N/A	#N/A		#N/A	#N/A	#N/A
CNGB1	#N/A	#N/A	#N/A		#N/A	#N/A	#N/A
CNGB3	#N/A	#N/A	#N/A		#N/A	#N/A	#N/A
CNIH1	#N/A	#N/A	#N/A		#N/A	#N/A	#N/A
CNIH2	#N/A	#N/A	#N/A		#N/A	#N/A	#N/A
CNIH3	#N/A	#N/A	#N/A		#N/A	#N/A	#N/A
CNIH4	#N/A	#N/A	#N/A		#N/A	#N/A	#N/A
CNMD	#N/A	#N/A	#N/A		#N/A	#N/A	#N/A
CNNM1	#N/A	#N/A	#N/A		Cnnm1	Cnnm1	Cnnm1
CNNM2	#N/A	#N/A	#N/A		#N/A	#N/A	#N/A
CNNM3	#N/A	#N/A	#N/A		#N/A	#N/A	#N/A
CNNM4	#N/A	#N/A	#N/A		#N/A	#N/A	#N/A
CNOT1	#N/A	#N/A	#N/A		#N/A	#N/A	#N/A
CNPPD1	#N/A	#N/A	#N/A		#N/A	#N/A	#N/A
CNR1	#N/A	#N/A	#N/A		#N/A	#N/A	Cnr1
CNR2	#N/A	#N/A	#N/A		#N/A	#N/A	#N/A
CNST	#N/A	#N/A	#N/A		#N/A	#N/A	#N/A
CNTD1	#N/A	#N/A	#N/A		#N/A	#N/A	#N/A
CNTFR	#N/A	#N/A	#N/A		#N/A	#N/A	#N/A
CNTN6	#N/A	#N/A	#N/A		#N/A	#N/A	#N/A
CNTNAP1	#N/A	#N/A	#N/A		#N/A	#N/A	#N/A
CNTNAP2	#N/A	#N/A	#N/A		#N/A	#N/A	Cntnap2
CNTNAP3	#N/A	#N/A	#N/A		#N/A	#N/A	#N/A
CNTNAP3B	#N/A	#N/A	#N/A		#N/A	#N/A	#N/A
CNTNAP4	#N/A	#N/A	#N/A		#N/A	#N/A	#N/A
CNTNAP5	#N/A	#N/A	#N/A		#N/A	#N/A	#N/A
COA1	#N/A	#N/A	#N/A		#N/A	#N/A	#N/A
COA3	#N/A	#N/A	#N/A		#N/A	#N/A	#N/A
COL13A1	#N/A	#N/A	#N/A		#N/A	#N/A	#N/A
COL17A1	#N/A	#N/A	#N/A		#N/A	#N/A	#N/A
COL25A1	Col25a1	Col25a1	#N/A		#N/A	#N/A	#N/A
COLEC12	#N/A	#N/A	#N/A		#N/A	#N/A	#N/A
COMT	#N/A	#N/A	#N/A		#N/A	#N/A	#N/A
COQ2	#N/A	#N/A	#N/A		#N/A	#N/A	#N/A
COQ7	#N/A	Coq7	#N/A		#N/A	#N/A	#N/A
CORIN	#N/A	#N/A	#N/A		#N/A	Corin	#N/A
COX10	#N/A	#N/A	#N/A		#N/A	#N/A	#N/A
COX11	#N/A	#N/A	#N/A		#N/A	#N/A	#N/A
COX14	#N/A	#N/A	#N/A		#N/A	#N/A	#N/A
COX15	#N/A	#N/A	#N/A		#N/A	#N/A	#N/A
COX18	#N/A	#N/A	#N/A		#N/A	#N/A	#N/A
COX20	#N/A	#N/A	#N/A		#N/A	#N/A	#N/A
COX4I1	#N/A	#N/A	#N/A		#N/A	#N/A	#N/A
COX4I2	#N/A	#N/A	#N/A		#N/A	#N/A	#N/A
COX6A1	#N/A	#N/A	#N/A		#N/A	#N/A	#N/A
COX6C	#N/A	#N/A	#N/A		#N/A	#N/A	#N/A
COX7A1	#N/A	#N/A	#N/A		#N/A	#N/A	#N/A
COX7A2	#N/A	#N/A	#N/A		#N/A	#N/A	#N/A
COX7A2L	#N/A	#N/A	#N/A		#N/A	#N/A	#N/A
COX7B	#N/A	#N/A	#N/A		#N/A	#N/A	#N/A
COX7B2	#N/A	#N/A	#N/A		#N/A	#N/A	#N/A
COX7C	#N/A	#N/A	#N/A		#N/A	#N/A	#N/A
COX8A	#N/A	#N/A	#N/A		#N/A	#N/A	#N/A
COX8C	#N/A	#N/A	#N/A		#N/A	#N/A	#N/A
CPD	#N/A	#N/A	#N/A		#N/A	#N/A	#N/A
CPM	#N/A	#N/A	#N/A		#N/A	#N/A	Cpm
CPOX	#N/A	#N/A	#N/A		#N/A	#N/A	#N/A
CPT1A	#N/A	#N/A	#N/A		#N/A	#N/A	#N/A
CPT1B	#N/A	#N/A	#N/A		#N/A	#N/A	#N/A
CPT1C	#N/A	#N/A	#N/A		#N/A	#N/A	#N/A
CR1	#N/A	#N/A	#N/A		#N/A	#N/A	#N/A
CR2	#N/A	#N/A	#N/A		#N/A	#N/A	#N/A
CRB1	#N/A	#N/A	#N/A		#N/A	#N/A	#N/A
CRB2	#N/A	#N/A	#N/A		#N/A	Crb2	Crb2
CRB3	#N/A	#N/A	#N/A		#N/A	#N/A	#N/A
CREB3	#N/A	#N/A	#N/A		#N/A	#N/A	#N/A
CREB3L1	#N/A	#N/A	#N/A		#N/A	#N/A	#N/A
CREB3L2	#N/A	#N/A	#N/A		#N/A	#N/A	#N/A
CREB3L3	#N/A	#N/A	#N/A		#N/A	#N/A	#N/A
CREB3L4	Creb3l4	#N/A	#N/A		#N/A	#N/A	#N/A
CRELD1	#N/A	#N/A	#N/A		#N/A	#N/A	#N/A
CRHR1	#N/A	#N/A	#N/A		#N/A	#N/A	#N/A
CRHR2	#N/A	#N/A	#N/A		#N/A	#N/A	#N/A
CRIM1	#N/A	#N/A	#N/A		#N/A	#N/A	#N/A
CRLF2	#N/A	#N/A	#N/A		#N/A	#N/A	#N/A
CRLS1	#N/A	#N/A	#N/A		#N/A	#N/A	#N/A
CRTAM	#N/A	#N/A	#N/A		#N/A	#N/A	#N/A
CRYAB	#N/A	#N/A	#N/A		#N/A	#N/A	#N/A
CS	#N/A	#N/A	#N/A		#N/A	#N/A	#N/A
CSF1	#N/A	#N/A	#N/A		#N/A	#N/A	#N/A
CSF1R	#N/A	#N/A	#N/A		#N/A	#N/A	#N/A
CSF2RA	#N/A	#N/A	#N/A		#N/A	#N/A	#N/A
CSF2RB	#N/A	#N/A	#N/A		#N/A	#N/A	#N/A
CSF3R	#N/A	Csf3r	Csf3r		#N/A	#N/A	#N/A
CSMD1	#N/A	#N/A	#N/A		#N/A	#N/A	Csmd1
CSMD2	#N/A	#N/A	#N/A		#N/A	#N/A	#N/A
CSMD3	#N/A	#N/A	#N/A		#N/A	#N/A	#N/A
CSNK1G1	#N/A	#N/A	#N/A		#N/A	#N/A	#N/A
CSPG4	#N/A	#N/A	#N/A		#N/A	#N/A	#N/A
CSPG5	#N/A	#N/A	#N/A		#N/A	#N/A	#N/A
CTAGE1	#N/A	#N/A	#N/A		#N/A	#N/A	#N/A
CTAGE15	#N/A	#N/A	#N/A		#N/A	#N/A	#N/A
CTAGE4	#N/A	#N/A	#N/A		#N/A	#N/A	#N/A
CTAGE5	#N/A	#N/A	#N/A		#N/A	#N/A	#N/A
CTAGE6	#N/A	#N/A	#N/A		#N/A	#N/A	#N/A
CTAGE8	#N/A	#N/A	#N/A		#N/A	#N/A	#N/A
CTAGE9	#N/A	#N/A	#N/A		#N/A	#N/A	#N/A
CTCFL	#N/A	#N/A	#N/A		#N/A	#N/A	#N/A
CTDNEP1	#N/A	#N/A	#N/A		#N/A	#N/A	#N/A
CTLA4	#N/A	#N/A	#N/A		#N/A	#N/A	#N/A
CTNS	#N/A	#N/A	#N/A		Ctns	Ctns	Ctns
CTSK	#N/A	#N/A	#N/A		#N/A	#N/A	#N/A
CTXN1	#N/A	#N/A	#N/A		#N/A	#N/A	#N/A
CTXN2	#N/A	#N/A	#N/A		#N/A	#N/A	#N/A
CTXN3	#N/A	#N/A	#N/A		#N/A	#N/A	#N/A
CTXND1	#N/A	#N/A	#N/A		#N/A	#N/A	#N/A
CTXND2	#N/A	#N/A	#N/A		#N/A	#N/A	#N/A
CUX1	#N/A	#N/A	#N/A		#N/A	#N/A	#N/A
CUX2	#N/A	#N/A	#N/A		Cux2	Cux2	Cux2
CUZD1	#N/A	#N/A	#N/A		#N/A	#N/A	#N/A
CWH43	#N/A	#N/A	#N/A		#N/A	#N/A	#N/A
CX3CL1	Cx3cl1	Cx3cl1	#N/A		#N/A	#N/A	#N/A
CX3CR1	#N/A	#N/A	Cx3cr1		#N/A	#N/A	#N/A
CXADR	Cxadr	Cxadr	#N/A		#N/A	#N/A	#N/A
CXCL16	Cxcl16	Cxcl16	Cxcl16		#N/A	#N/A	#N/A
CXCR1	#N/A	#N/A	#N/A		#N/A	#N/A	#N/A
CXCR2	#N/A	#N/A	Cxcr2		#N/A	#N/A	#N/A
CXCR3	#N/A	#N/A	#N/A		#N/A	#N/A	#N/A
CXCR4	Cxcr4	Cxcr4	Cxcr4		#N/A	#N/A	#N/A
CXCR5	#N/A	#N/A	#N/A		#N/A	#N/A	#N/A
CXCR6	#N/A	#N/A	#N/A		#N/A	#N/A	#N/A
CXorf66	#N/A	#N/A	#N/A		#N/A	#N/A	#N/A
CYB561	#N/A	#N/A	#N/A		#N/A	#N/A	Cyb561
CYB561A3	#N/A	#N/A	#N/A		#N/A	#N/A	#N/A
CYB561D1	#N/A	#N/A	#N/A		#N/A	#N/A	Cyb561d1
CYB561D2	#N/A	#N/A	#N/A		#N/A	#N/A	#N/A
CYB5A	#N/A	#N/A	#N/A		#N/A	#N/A	#N/A
CYB5B	#N/A	#N/A	#N/A		#N/A	#N/A	#N/A
CYB5R2	#N/A	#N/A	#N/A		Cyb5r2	Cyb5r2	Cyb5r2
CYB5R3	#N/A	#N/A	#N/A		#N/A	#N/A	#N/A
CYBA	Cyba	Cyba	Cyba		#N/A	#N/A	#N/A
CYBB	#N/A	#N/A	#N/A		#N/A	#N/A	#N/A
CYBRD1	#N/A	#N/A	#N/A		#N/A	#N/A	#N/A
CYC1	#N/A	#N/A	#N/A		#N/A	#N/A	#N/A
CYHR1	#N/A	#N/A	#N/A		#N/A	#N/A	#N/A
CYP19A1	#N/A	#N/A	#N/A		#N/A	#N/A	#N/A
CYP1A1	#N/A	#N/A	#N/A		Cyp1a1	Cyp1a1	Cyp1a1
CYP1A2	#N/A	#N/A	#N/A		#N/A	#N/A	#N/A
CYP1B1	#N/A	#N/A	#N/A		#N/A	#N/A	#N/A
CYP20A1	#N/A	#N/A	#N/A		#N/A	Cyp20a1	#N/A
CYP26C1	#N/A	#N/A	#N/A		#N/A	#N/A	#N/A
CYP2D6	#N/A	#N/A	#N/A		#N/A	#N/A	#N/A
CYP2S1	#N/A	#N/A	#N/A		#N/A	#N/A	#N/A
CYP2U1	#N/A	#N/A	#N/A		#N/A	#N/A	#N/A
CYP39A1	#N/A	#N/A	#N/A		#N/A	#N/A	#N/A
CYP3A4	#N/A	#N/A	#N/A		#N/A	#N/A	#N/A
CYP3A43	#N/A	#N/A	#N/A		#N/A	#N/A	#N/A
CYP3A5	#N/A	#N/A	#N/A		#N/A	#N/A	#N/A
CYP3A7	#N/A	#N/A	#N/A		#N/A	#N/A	#N/A
CYP3A7-CYP3A51P	#N/A	#N/A	#N/A		#N/A	#N/A	#N/A
CYP4A11	#N/A	#N/A	#N/A		#N/A	#N/A	#N/A
CYP4A22	#N/A	#N/A	#N/A		#N/A	#N/A	#N/A
CYP4B1	#N/A	#N/A	#N/A		#N/A	#N/A	#N/A
CYP4F12	#N/A	#N/A	#N/A		#N/A	#N/A	#N/A
CYP4F2	#N/A	#N/A	#N/A		#N/A	#N/A	#N/A
CYP4F22	#N/A	#N/A	#N/A		#N/A	#N/A	#N/A
CYP4F8	#N/A	#N/A	#N/A		#N/A	#N/A	#N/A
CYP4V2	#N/A	#N/A	#N/A		#N/A	#N/A	#N/A
CYP4X1	#N/A	#N/A	#N/A		#N/A	#N/A	#N/A
CYP4Z1	#N/A	#N/A	#N/A		#N/A	#N/A	#N/A
CYP51A1	#N/A	#N/A	#N/A		#N/A	#N/A	#N/A
CYP7B1	#N/A	#N/A	#N/A		#N/A	#N/A	#N/A
CYP8B1	#N/A	#N/A	#N/A		#N/A	#N/A	#N/A
CYSLTR1	#N/A	#N/A	#N/A		#N/A	#N/A	#N/A
CYSLTR2	#N/A	Cysltr2	Cysltr2		#N/A	#N/A	#N/A
CYYR1	#N/A	#N/A	#N/A		#N/A	#N/A	#N/A
DAD1	#N/A	#N/A	#N/A		#N/A	#N/A	#N/A
DAG1	#N/A	#N/A	#N/A		#N/A	#N/A	#N/A
DAGLA	#N/A	#N/A	#N/A		#N/A	#N/A	Dagla
DAGLB	#N/A	#N/A	#N/A		#N/A	#N/A	#N/A
DAPK1	#N/A	#N/A	#N/A		#N/A	#N/A	Dapk1
DAPK2	#N/A	#N/A	#N/A		#N/A	#N/A	#N/A
DAPK3	#N/A	#N/A	#N/A		#N/A	#N/A	#N/A
DAPL1	Dapl1	Dapl1	Dapl1		#N/A	#N/A	#N/A
DCAF17	#N/A	#N/A	#N/A		#N/A	#N/A	#N/A
DCAKD	#N/A	#N/A	#N/A		#N/A	#N/A	#N/A
DCBLD1	#N/A	Dcbld1	#N/A		#N/A	#N/A	#N/A
DCBLD2	#N/A	#N/A	#N/A		#N/A	#N/A	#N/A
DCC	#N/A	#N/A	#N/A		#N/A	#N/A	#N/A
DCHS1	#N/A	#N/A	#N/A		#N/A	#N/A	#N/A
DCHS2	#N/A	#N/A	#N/A		#N/A	#N/A	#N/A
DCLK1	#N/A	#N/A	#N/A		#N/A	#N/A	#N/A
DCLK3	#N/A	#N/A	#N/A		#N/A	#N/A	#N/A
DCP1B	#N/A	#N/A	#N/A		#N/A	#N/A	#N/A
DCST1	#N/A	#N/A	#N/A		#N/A	#N/A	#N/A
DCST2	#N/A	#N/A	#N/A		#N/A	#N/A	#N/A
DCSTAMP	#N/A	#N/A	#N/A		#N/A	#N/A	#N/A
DCT	#N/A	#N/A	#N/A		#N/A	#N/A	#N/A
DDO	#N/A	#N/A	#N/A		#N/A	#N/A	#N/A
DDOST	#N/A	#N/A	#N/A		#N/A	#N/A	#N/A
DDR1	#N/A	#N/A	#N/A		#N/A	#N/A	#N/A
DDR2	#N/A	#N/A	#N/A		#N/A	Ddr2	#N/A
DDX3X	#N/A	#N/A	#N/A		#N/A	#N/A	#N/A
DEGS1	#N/A	#N/A	#N/A		#N/A	#N/A	#N/A
DEGS2	#N/A	#N/A	#N/A		#N/A	#N/A	Degs2
DENND1A	#N/A	#N/A	#N/A		#N/A	#N/A	#N/A
DENND1B	#N/A	#N/A	#N/A		#N/A	#N/A	#N/A
DENND3	#N/A	#N/A	#N/A		#N/A	#N/A	Dennd3
DENND4B	#N/A	#N/A	#N/A		#N/A	#N/A	#N/A
DENND4C	#N/A	#N/A	#N/A		#N/A	#N/A	#N/A
DENND5A	#N/A	#N/A	#N/A		#N/A	#N/A	#N/A
DENND5B	#N/A	#N/A	#N/A		#N/A	#N/A	#N/A
DERL1	#N/A	#N/A	#N/A		#N/A	#N/A	#N/A
DERL2	#N/A	#N/A	#N/A		#N/A	#N/A	#N/A
DERL3	#N/A	#N/A	#N/A		Derl3	Derl3	Derl3
DEUP1	#N/A	#N/A	#N/A		#N/A	#N/A	#N/A
DEXI	#N/A	#N/A	#N/A		#N/A	#N/A	#N/A
DGAT1	#N/A	#N/A	#N/A		#N/A	#N/A	#N/A
DGAT2	Dgat2	Dgat2	#N/A		#N/A	#N/A	#N/A
DGAT2L6	#N/A	#N/A	#N/A		#N/A	#N/A	#N/A
DGCR2	#N/A	#N/A	#N/A		#N/A	#N/A	#N/A
DGKE	#N/A	#N/A	#N/A		#N/A	#N/A	#N/A
DHCR24	Dhcr24	Dhcr24	Dhcr24		#N/A	#N/A	#N/A
DHCR7	Dhcr7	Dhcr7	#N/A		#N/A	#N/A	#N/A
DHODH	#N/A	#N/A	#N/A		#N/A	#N/A	#N/A
DHRS3	Dhrs3	Dhrs3	#N/A		#N/A	#N/A	#N/A
DHRS7B	#N/A	#N/A	#N/A		#N/A	#N/A	#N/A
DHRS9	Dhrs9	Dhrs9	Dhrs9		#N/A	#N/A	#N/A
DHX36	#N/A	#N/A	#N/A		#N/A	#N/A	#N/A
DIABLO	#N/A	#N/A	#N/A		#N/A	#N/A	#N/A
DIABLO	#N/A	#N/A	#N/A		#N/A	#N/A	#N/A
DIO1	Dio1	Dio1	Dio1		#N/A	#N/A	#N/A
DIO2	#N/A	#N/A	#N/A		#N/A	#N/A	#N/A
DIO3	#N/A	#N/A	#N/A		#N/A	#N/A	#N/A
DIP2A	#N/A	#N/A	#N/A		#N/A	#N/A	#N/A
DIP2C	#N/A	#N/A	#N/A		#N/A	#N/A	#N/A
DIRC2	#N/A	#N/A	#N/A		#N/A	#N/A	#N/A
DISP1	#N/A	#N/A	Disp1		#N/A	#N/A	#N/A
DISP2	#N/A	#N/A	#N/A		#N/A	#N/A	#N/A
DISP3	#N/A	#N/A	#N/A		#N/A	#N/A	#N/A
DLK1	#N/A	#N/A	#N/A		#N/A	#N/A	#N/A
DLK2	#N/A	#N/A	#N/A		#N/A	#N/A	#N/A
DLL1	#N/A	#N/A	#N/A		#N/A	#N/A	#N/A
DLL3	#N/A	#N/A	#N/A		#N/A	#N/A	#N/A
DLL4	#N/A	#N/A	Dll4		#N/A	#N/A	#N/A
DMAC1	#N/A	#N/A	#N/A		#N/A	#N/A	#N/A
DMPK	#N/A	#N/A	#N/A		Dmpk	Dmpk	Dmpk
DMRT2	#N/A	#N/A	#N/A		#N/A	#N/A	#N/A
DMXL2	#N/A	#N/A	#N/A		#N/A	#N/A	#N/A
DNAH2	#N/A	#N/A	#N/A		#N/A	#N/A	#N/A
DNAJB12	#N/A	#N/A	#N/A		#N/A	#N/A	#N/A
DNAJB14	#N/A	#N/A	#N/A		Dnajb14	Dnajb14	Dnajb14
DNAJC1	#N/A	#N/A	#N/A		#N/A	#N/A	#N/A
DNAJC10	#N/A	#N/A	#N/A		#N/A	#N/A	Dnajc10
DNAJC11	#N/A	#N/A	#N/A		#N/A	#N/A	#N/A
DNAJC13	#N/A	#N/A	#N/A		#N/A	#N/A	#N/A
DNAJC14	#N/A	#N/A	#N/A		#N/A	#N/A	#N/A
DNAJC15	#N/A	#N/A	#N/A		#N/A	#N/A	#N/A
DNAJC16	#N/A	#N/A	#N/A		#N/A	#N/A	#N/A
DNAJC18	#N/A	#N/A	#N/A		#N/A	#N/A	#N/A
DNAJC22	#N/A	Dnajc22	Dnajc22		#N/A	#N/A	#N/A
DNAJC25	#N/A	#N/A	#N/A		#N/A	#N/A	#N/A
DNAJC30	#N/A	#N/A	#N/A		#N/A	#N/A	#N/A
DNAJC4	#N/A	#N/A	#N/A		#N/A	#N/A	#N/A
DNAJC5	#N/A	#N/A	#N/A		#N/A	#N/A	#N/A
DNAJC5B	#N/A	#N/A	#N/A		#N/A	#N/A	#N/A
DNAJC5G	#N/A	#N/A	#N/A		#N/A	#N/A	#N/A
DNER	#N/A	#N/A	#N/A		Dner	Dner	Dner
DNPEP	#N/A	#N/A	#N/A		#N/A	#N/A	#N/A
DOK7	#N/A	#N/A	#N/A		#N/A	#N/A	#N/A
DOLK	#N/A	#N/A	#N/A		#N/A	#N/A	#N/A
DOLPP1	#N/A	#N/A	#N/A		#N/A	#N/A	#N/A
DONSON	#N/A	#N/A	#N/A		#N/A	#N/A	#N/A
DOPEY1	#N/A	#N/A	#N/A		#N/A	#N/A	#N/A
DPAGT1	#N/A	#N/A	#N/A		#N/A	#N/A	#N/A
DPCR1	#N/A	#N/A	#N/A		#N/A	#N/A	#N/A
DPEP2	#N/A	#N/A	#N/A		#N/A	#N/A	#N/A
DPM2	#N/A	#N/A	#N/A		#N/A	#N/A	#N/A
DPM3	#N/A	#N/A	#N/A		#N/A	#N/A	#N/A
DPP10	#N/A	#N/A	#N/A		#N/A	#N/A	#N/A
DPP4	#N/A	#N/A	#N/A		#N/A	#N/A	#N/A
DPP6	#N/A	#N/A	#N/A		#N/A	Dpp6	#N/A
DPY19L1	#N/A	#N/A	#N/A		#N/A	#N/A	#N/A
DPY19L2	#N/A	#N/A	#N/A		#N/A	#N/A	#N/A
DPY19L3	#N/A	#N/A	#N/A		#N/A	#N/A	#N/A
DPY19L4	#N/A	#N/A	#N/A		#N/A	#N/A	#N/A
DRAM1	Dram1	Dram1	Dram1		#N/A	#N/A	#N/A
DRAM2	Dram2	Dram2	#N/A		#N/A	#N/A	#N/A
DRD1	#N/A	#N/A	#N/A		#N/A	#N/A	#N/A
DRD2	#N/A	#N/A	#N/A		#N/A	#N/A	#N/A
DRD3	#N/A	#N/A	#N/A		#N/A	#N/A	#N/A
DRD4	#N/A	#N/A	#N/A		#N/A	#N/A	#N/A
DRD5	#N/A	#N/A	#N/A		#N/A	#N/A	#N/A
DSC1	#N/A	#N/A	#N/A		#N/A	#N/A	#N/A
DSC2	#N/A	#N/A	Dsc2		#N/A	#N/A	#N/A
DSC3	#N/A	Dsc3	#N/A		#N/A	#N/A	#N/A
DSCAM	#N/A	#N/A	#N/A		Dscam	Dscam	#N/A
DSCAML1	#N/A	#N/A	#N/A		#N/A	#N/A	#N/A
DSE	#N/A	#N/A	#N/A		#N/A	#N/A	#N/A
DSEL	#N/A	#N/A	#N/A		#N/A	#N/A	#N/A
DSG1	#N/A	#N/A	#N/A		#N/A	#N/A	#N/A
DSG2	#N/A	#N/A	#N/A		#N/A	#N/A	#N/A
DSG3	#N/A	#N/A	#N/A		#N/A	#N/A	#N/A
DSG4	#N/A	#N/A	#N/A		#N/A	#N/A	#N/A
DTNA	#N/A	#N/A	#N/A		#N/A	#N/A	#N/A
DUOX1	#N/A	#N/A	#N/A		#N/A	#N/A	#N/A
DUOX2	#N/A	#N/A	#N/A		#N/A	#N/A	#N/A
DUOXA1	#N/A	#N/A	#N/A		#N/A	#N/A	#N/A
DUOXA2	#N/A	#N/A	#N/A		#N/A	#N/A	#N/A
DUSP13	#N/A	#N/A	#N/A		#N/A	#N/A	#N/A
DWORF	#N/A	#N/A	#N/A		#N/A	#N/A	#N/A
DYM	#N/A	#N/A	#N/A		#N/A	#N/A	#N/A
DYNAP	#N/A	#N/A	#N/A		#N/A	#N/A	#N/A
DYRK2	#N/A	#N/A	#N/A		#N/A	#N/A	#N/A
DYSF	#N/A	#N/A	#N/A		#N/A	#N/A	#N/A
DZIP3	#N/A	#N/A	#N/A		#N/A	#N/A	#N/A
E2F5	#N/A	#N/A	#N/A		#N/A	#N/A	#N/A
EBLN1	#N/A	#N/A	#N/A		#N/A	#N/A	#N/A
EBP	#N/A	#N/A	#N/A		#N/A	#N/A	#N/A
EBPL	#N/A	#N/A	#N/A		#N/A	#N/A	#N/A
ECE1	#N/A	#N/A	#N/A		#N/A	#N/A	#N/A
ECE2	#N/A	#N/A	#N/A		#N/A	#N/A	#N/A
ECEL1	#N/A	#N/A	#N/A		#N/A	#N/A	#N/A
ECSCR	#N/A	#N/A	Ecscr		#N/A	#N/A	#N/A
EDA	#N/A	#N/A	#N/A		#N/A	#N/A	#N/A
EDA2R	#N/A	#N/A	#N/A		#N/A	#N/A	#N/A
EDAR	#N/A	#N/A	#N/A		#N/A	#N/A	Edar
EDNRA	#N/A	#N/A	#N/A		#N/A	#N/A	#N/A
EDNRB	#N/A	#N/A	#N/A		#N/A	#N/A	#N/A
EDRF1	#N/A	#N/A	#N/A		#N/A	#N/A	#N/A
EEF1AKMT4-ECE2	#N/A	#N/A	#N/A		#N/A	#N/A	#N/A
EEF1E1	#N/A	#N/A	#N/A		#N/A	#N/A	#N/A
EFCAB14	#N/A	#N/A	#N/A		#N/A	#N/A	#N/A
EFNA3	#N/A	#N/A	#N/A		#N/A	#N/A	#N/A
EFNA4	#N/A	#N/A	#N/A		#N/A	#N/A	#N/A
EFNA5	#N/A	#N/A	#N/A		#N/A	#N/A	#N/A
EFNB1	#N/A	#N/A	Efnb1		#N/A	#N/A	#N/A
EFNB2	#N/A	#N/A	#N/A		#N/A	#N/A	#N/A
EFNB3	#N/A	#N/A	#N/A		#N/A	#N/A	#N/A
EGF	#N/A	#N/A	#N/A		Egf	Egf	Egf
EGFR	#N/A	#N/A	#N/A		#N/A	#N/A	#N/A
EI24	#N/A	#N/A	#N/A		#N/A	#N/A	#N/A
EIF2AK3	#N/A	#N/A	#N/A		#N/A	#N/A	#N/A
EIF3L	#N/A	#N/A	#N/A		#N/A	#N/A	#N/A
ELFN1	#N/A	#N/A	#N/A		#N/A	#N/A	Elfn1
ELFN2	#N/A	#N/A	#N/A		#N/A	#N/A	Elfn2
ELMOD1	#N/A	#N/A	#N/A		#N/A	#N/A	#N/A
ELOVL1	#N/A	#N/A	#N/A		#N/A	#N/A	#N/A
ELOVL2	#N/A	#N/A	#N/A		#N/A	#N/A	#N/A
ELOVL3	#N/A	#N/A	#N/A		#N/A	#N/A	#N/A
ELOVL4	#N/A	#N/A	#N/A		#N/A	#N/A	#N/A
ELOVL5	#N/A	#N/A	#N/A		#N/A	#N/A	#N/A
ELOVL6	#N/A	#N/A	#N/A		#N/A	#N/A	#N/A
ELOVL7	#N/A	#N/A	#N/A		#N/A	#N/A	#N/A
ELP6	#N/A	#N/A	#N/A		#N/A	#N/A	#N/A
EMB	#N/A	#N/A	#N/A		#N/A	#N/A	#N/A
EMC1	#N/A	#N/A	#N/A		#N/A	#N/A	#N/A
EMC10	#N/A	#N/A	#N/A		#N/A	#N/A	#N/A
EMC3	#N/A	#N/A	#N/A		#N/A	#N/A	#N/A
EMC4	#N/A	#N/A	#N/A		#N/A	#N/A	#N/A
EMC6	#N/A	#N/A	#N/A		#N/A	#N/A	#N/A
EMC7	#N/A	#N/A	#N/A		#N/A	#N/A	#N/A
EMCN	#N/A	#N/A	#N/A		#N/A	#N/A	#N/A
EMD	#N/A	#N/A	#N/A		#N/A	#N/A	#N/A
EMP1	#N/A	#N/A	Emp1		#N/A	#N/A	#N/A
EMP2	Emp2	Emp2	#N/A		#N/A	#N/A	#N/A
EMP3	#N/A	#N/A	#N/A		#N/A	#N/A	#N/A
ENDOD1	#N/A	#N/A	#N/A		#N/A	#N/A	#N/A
ENG	#N/A	#N/A	#N/A		#N/A	#N/A	#N/A
ENPEP	#N/A	#N/A	#N/A		#N/A	#N/A	#N/A
ENPP1	#N/A	#N/A	#N/A		#N/A	#N/A	#N/A
ENPP2	#N/A	#N/A	#N/A		#N/A	#N/A	#N/A
ENPP4	#N/A	#N/A	#N/A		#N/A	#N/A	#N/A
ENPP5	#N/A	#N/A	#N/A		#N/A	#N/A	#N/A
ENTPD1	#N/A	#N/A	#N/A		#N/A	#N/A	#N/A
ENTPD2	#N/A	#N/A	#N/A		#N/A	#N/A	#N/A
ENTPD3	#N/A	#N/A	#N/A		#N/A	#N/A	Entpd3
ENTPD4	#N/A	#N/A	#N/A		#N/A	#N/A	#N/A
ENTPD6	#N/A	#N/A	#N/A		#N/A	#N/A	#N/A
ENTPD7	#N/A	#N/A	#N/A		#N/A	#N/A	#N/A
ENTPD8	Entpd8	Entpd8	Entpd8		#N/A	#N/A	#N/A
EOGT	#N/A	#N/A	#N/A		#N/A	#N/A	#N/A
EPB41	#N/A	#N/A	#N/A		#N/A	#N/A	#N/A
EPB41L2	#N/A	#N/A	#N/A		#N/A	#N/A	#N/A
EPB41L3	#N/A	#N/A	#N/A		#N/A	#N/A	#N/A
EPCAM	#N/A	#N/A	#N/A		#N/A	#N/A	#N/A
EPGN	#N/A	#N/A	#N/A		#N/A	#N/A	#N/A
EPHA1	#N/A	#N/A	#N/A		#N/A	#N/A	#N/A
EPHA10	#N/A	#N/A	#N/A		#N/A	#N/A	#N/A
EPHA2	Epha2	Epha2	Epha2		#N/A	#N/A	#N/A
EPHA3	#N/A	#N/A	#N/A		#N/A	Epha3	#N/A
EPHA4	Epha4	Epha4	#N/A		#N/A	#N/A	#N/A
EPHA5	#N/A	#N/A	#N/A		#N/A	#N/A	#N/A
EPHA6	#N/A	#N/A	#N/A		Epha6	Epha6	#N/A
EPHA7	#N/A	#N/A	#N/A		#N/A	#N/A	#N/A
EPHA8	#N/A	#N/A	#N/A		#N/A	#N/A	#N/A
EPHB1	#N/A	#N/A	#N/A		#N/A	#N/A	#N/A
EPHB2	Ephb2	Ephb2	Ephb2		#N/A	#N/A	#N/A
EPHB3	Ephb3	Ephb3	Ephb3		#N/A	#N/A	#N/A
EPHB4	#N/A	#N/A	#N/A		#N/A	#N/A	#N/A
EPHB6	Ephb6	Ephb6	#N/A		#N/A	#N/A	#N/A
EPOR	#N/A	#N/A	#N/A		#N/A	#N/A	#N/A
EPSTI1	Epsti1	Epsti1	Epsti1		#N/A	#N/A	#N/A
EQTN	#N/A	#N/A	#N/A		#N/A	#N/A	#N/A
ERBB2	#N/A	#N/A	#N/A		#N/A	#N/A	#N/A
ERBB3	#N/A	#N/A	#N/A		#N/A	#N/A	#N/A
ERBB4	#N/A	#N/A	#N/A		#N/A	#N/A	Erbb4
EREG	#N/A	#N/A	#N/A		#N/A	#N/A	#N/A
ERG28	#N/A	#N/A	#N/A		#N/A	#N/A	#N/A
ERGIC1	#N/A	#N/A	#N/A		#N/A	#N/A	#N/A
ERGIC2	#N/A	#N/A	#N/A		#N/A	#N/A	#N/A
ERGIC3	#N/A	#N/A	#N/A		#N/A	#N/A	#N/A
ERMAP	#N/A	#N/A	#N/A		#N/A	#N/A	#N/A
ERMARD	#N/A	#N/A	#N/A		#N/A	#N/A	#N/A
ERMP1	Ermp1	Ermp1	#N/A		#N/A	#N/A	#N/A
ERN1	#N/A	#N/A	#N/A		#N/A	#N/A	Ern1
ERN2	Ern2	Ern2	Ern2		#N/A	#N/A	#N/A
ERVFRD-1	#N/A	#N/A	#N/A		#N/A	#N/A	#N/A
ERVMER34-1	#N/A	#N/A	#N/A		#N/A	#N/A	#N/A
ERVV-1	#N/A	#N/A	#N/A		#N/A	#N/A	#N/A
ERVV-2	#N/A	#N/A	#N/A		#N/A	#N/A	#N/A
ERVW-1	#N/A	#N/A	#N/A		#N/A	#N/A	#N/A
ESAM	#N/A	#N/A	#N/A		#N/A	#N/A	#N/A
ESPL1	Espl1	Espl1	Espl1		#N/A	#N/A	#N/A
ESYT1	#N/A	#N/A	#N/A		#N/A	#N/A	#N/A
ESYT2	#N/A	#N/A	#N/A		#N/A	#N/A	#N/A
ESYT3	#N/A	#N/A	#N/A		#N/A	#N/A	Esyt3
ETFDH	#N/A	#N/A	#N/A		#N/A	#N/A	#N/A
ETNK1	#N/A	#N/A	#N/A		#N/A	#N/A	#N/A
EVA1A	Eva1a	Eva1a	#N/A		#N/A	#N/A	#N/A
EVA1C	#N/A	#N/A	#N/A		#N/A	#N/A	#N/A
EVC	#N/A	#N/A	#N/A		#N/A	#N/A	#N/A
EVC2	#N/A	#N/A	#N/A		#N/A	#N/A	#N/A
EVI2A	#N/A	#N/A	#N/A		#N/A	#N/A	#N/A
EVI2B	#N/A	#N/A	#N/A		#N/A	#N/A	#N/A
EVI5	#N/A	#N/A	#N/A		#N/A	#N/A	#N/A
EVI5L	#N/A	#N/A	#N/A		#N/A	#N/A	#N/A
EXD2	#N/A	#N/A	#N/A		#N/A	#N/A	#N/A
EXT1	#N/A	#N/A	#N/A		#N/A	#N/A	#N/A
EXT2	#N/A	#N/A	#N/A		#N/A	#N/A	#N/A
EXTL3	#N/A	#N/A	#N/A		#N/A	#N/A	#N/A
F11R	#N/A	#N/A	#N/A		#N/A	#N/A	#N/A
F2R	#N/A	#N/A	#N/A		#N/A	#N/A	#N/A
F2RL1	F2rl1	F2rl1	F2rl1		#N/A	#N/A	#N/A
F2RL2	#N/A	#N/A	#N/A		#N/A	#N/A	#N/A
F2RL3	#N/A	#N/A	#N/A		#N/A	#N/A	#N/A
F3	F3	F3	F3		#N/A	#N/A	#N/A
FA2H	Fa2h	Fa2h	#N/A		#N/A	#N/A	#N/A
FAAH	#N/A	#N/A	#N/A		#N/A	#N/A	#N/A
FADS1	#N/A	#N/A	#N/A		#N/A	#N/A	#N/A
FADS2	#N/A	#N/A	#N/A		#N/A	#N/A	#N/A
FADS3	#N/A	#N/A	#N/A		#N/A	#N/A	#N/A
FADS6	#N/A	#N/A	#N/A		#N/A	#N/A	#N/A
FAF2	#N/A	#N/A	#N/A		#N/A	#N/A	#N/A
FAIM2	#N/A	#N/A	#N/A		#N/A	#N/A	Faim2
FAM105A	#N/A	#N/A	Fam105a		#N/A	#N/A	#N/A
FAM122C	#N/A	#N/A	#N/A		#N/A	#N/A	#N/A
FAM155A	#N/A	#N/A	#N/A		#N/A	#N/A	#N/A
FAM155B	#N/A	#N/A	#N/A		#N/A	#N/A	#N/A
FAM160A2	#N/A	#N/A	#N/A		#N/A	#N/A	#N/A
FAM162A	#N/A	#N/A	#N/A		#N/A	#N/A	#N/A
FAM162B	#N/A	#N/A	#N/A		#N/A	#N/A	#N/A
FAM163A	#N/A	#N/A	#N/A		#N/A	#N/A	#N/A
FAM163B	#N/A	#N/A	#N/A		#N/A	#N/A	#N/A
FAM171A1	#N/A	#N/A	#N/A		#N/A	#N/A	#N/A
FAM171A2	#N/A	#N/A	#N/A		#N/A	#N/A	#N/A
FAM171B	#N/A	#N/A	#N/A		Fam171b	Fam171b	Fam171b
FAM173A	#N/A	#N/A	#N/A		#N/A	#N/A	#N/A
FAM173B	#N/A	#N/A	#N/A		#N/A	#N/A	#N/A
FAM174A	#N/A	#N/A	#N/A		#N/A	#N/A	#N/A
FAM174B	#N/A	#N/A	#N/A		#N/A	#N/A	Fam174b
FAM187A	#N/A	#N/A	#N/A		#N/A	#N/A	#N/A
FAM187B	#N/A	#N/A	#N/A		#N/A	#N/A	Fam187b
FAM189A1	#N/A	#N/A	#N/A		#N/A	Fam189a1	Fam189a1
FAM189A2	#N/A	#N/A	#N/A		#N/A	#N/A	#N/A
FAM189B	#N/A	#N/A	#N/A		#N/A	#N/A	#N/A
FAM198B	#N/A	#N/A	#N/A		#N/A	#N/A	#N/A
FAM205A	#N/A	#N/A	#N/A		#N/A	#N/A	#N/A
FAM205C	#N/A	#N/A	#N/A		#N/A	#N/A	#N/A
FAM209A	#N/A	#N/A	#N/A		#N/A	#N/A	#N/A
FAM209B	#N/A	#N/A	#N/A		#N/A	#N/A	#N/A
FAM210A	#N/A	#N/A	#N/A		#N/A	Fam210a	#N/A
FAM210B	#N/A	#N/A	#N/A		#N/A	#N/A	Fam210b
FAM213A	#N/A	#N/A	#N/A		#N/A	#N/A	#N/A
FAM220A	#N/A	#N/A	#N/A		#N/A	#N/A	#N/A
FAM234A	#N/A	#N/A	#N/A		#N/A	#N/A	#N/A
FAM234B	#N/A	#N/A	#N/A		#N/A	#N/A	#N/A
FAM241A	#N/A	#N/A	#N/A		#N/A	#N/A	#N/A
FAM241B	#N/A	#N/A	#N/A		#N/A	#N/A	#N/A
FAM35A	#N/A	#N/A	#N/A		#N/A	#N/A	#N/A
FAM3A	#N/A	#N/A	#N/A		#N/A	#N/A	#N/A
FAM3B	Fam3b	Fam3b	#N/A		#N/A	#N/A	#N/A
FAM3D	#N/A	#N/A	#N/A		#N/A	#N/A	#N/A
FAM57A	Fam57a	Fam57a	Fam57a		#N/A	#N/A	#N/A
FAM57B	#N/A	#N/A	#N/A		#N/A	#N/A	#N/A
FAM69A	#N/A	#N/A	#N/A		#N/A	#N/A	#N/A
FAM69B	#N/A	#N/A	#N/A		#N/A	#N/A	#N/A
FAM76B	#N/A	#N/A	#N/A		#N/A	#N/A	#N/A
FAM8A1	#N/A	#N/A	#N/A		#N/A	#N/A	#N/A
FAM98B	#N/A	#N/A	#N/A		#N/A	#N/A	#N/A
FAM9C	#N/A	#N/A	#N/A		#N/A	#N/A	#N/A
FANCA	#N/A	#N/A	#N/A		#N/A	#N/A	#N/A
FAR1	#N/A	#N/A	#N/A		#N/A	#N/A	#N/A
FAR2	#N/A	#N/A	#N/A		#N/A	#N/A	#N/A
FAS	#N/A	#N/A	#N/A		#N/A	#N/A	Fas
FASLG	#N/A	#N/A	#N/A		#N/A	#N/A	#N/A
FAT1	#N/A	#N/A	#N/A		#N/A	#N/A	#N/A
FAT2	#N/A	#N/A	#N/A		#N/A	#N/A	#N/A
FAT3	#N/A	#N/A	#N/A		Fat3	Fat3	Fat3
FAT4	#N/A	#N/A	#N/A		#N/A	#N/A	#N/A
FATE1	#N/A	#N/A	#N/A		#N/A	#N/A	#N/A
FAXDC2	#N/A	#N/A	#N/A		#N/A	#N/A	#N/A
FBXL17	#N/A	#N/A	#N/A		#N/A	#N/A	#N/A
FBXO18	#N/A	#N/A	#N/A		#N/A	#N/A	#N/A
FBXO31	#N/A	#N/A	#N/A		#N/A	#N/A	Fbxo31
FBXW12	#N/A	#N/A	#N/A		#N/A	#N/A	#N/A
FCAMR	Fcamr	Fcamr	#N/A		#N/A	#N/A	#N/A
FCAR	#N/A	#N/A	#N/A		#N/A	#N/A	#N/A
FCER1A	#N/A	#N/A	#N/A		#N/A	#N/A	Fcer1a
FCER1G	#N/A	#N/A	Fcer1g		#N/A	#N/A	#N/A
FCER2	#N/A	#N/A	#N/A		#N/A	#N/A	#N/A
FCGR1A	#N/A	#N/A	#N/A		#N/A	#N/A	#N/A
FCGR1B	#N/A	#N/A	#N/A		#N/A	#N/A	#N/A
FCGR2A	#N/A	#N/A	#N/A		#N/A	#N/A	#N/A
FCGR2B	#N/A	#N/A	Fcgr2b		#N/A	#N/A	#N/A
FCGR3A	#N/A	#N/A	#N/A		#N/A	#N/A	#N/A
FCGR3B	#N/A	#N/A	#N/A		#N/A	#N/A	#N/A
FCGRT	#N/A	#N/A	Fcgrt		#N/A	#N/A	#N/A
FCMR	#N/A	#N/A	#N/A		#N/A	#N/A	#N/A
FCN1	#N/A	#N/A	#N/A		#N/A	#N/A	#N/A
FCRL1	#N/A	#N/A	#N/A		#N/A	#N/A	#N/A
FCRL2	#N/A	#N/A	#N/A		#N/A	#N/A	#N/A
FCRL3	#N/A	#N/A	#N/A		#N/A	#N/A	#N/A
FCRL4	#N/A	#N/A	#N/A		#N/A	#N/A	#N/A
FCRL5	#N/A	#N/A	#N/A		#N/A	#N/A	#N/A
FCRL6	#N/A	#N/A	#N/A		#N/A	#N/A	#N/A
FCRLA	#N/A	#N/A	#N/A		#N/A	#N/A	#N/A
FDFT1	#N/A	#N/A	#N/A		#N/A	#N/A	#N/A
FER1L5	#N/A	#N/A	#N/A		#N/A	#N/A	#N/A
FER1L6	#N/A	#N/A	#N/A		#N/A	#N/A	#N/A
FFAR1	#N/A	#N/A	#N/A		#N/A	#N/A	#N/A
FFAR2	Ffar2	#N/A	#N/A		#N/A	#N/A	#N/A
FFAR3	#N/A	#N/A	#N/A		#N/A	#N/A	#N/A
FFAR4	Ffar4	Ffar4	Ffar4		#N/A	#N/A	#N/A
FGFR1	#N/A	#N/A	#N/A		#N/A	#N/A	#N/A
FGFR2	#N/A	#N/A	#N/A		#N/A	#N/A	#N/A
FGFR3	Fgfr3	Fgfr3	#N/A		#N/A	#N/A	#N/A
FGFR4	#N/A	#N/A	#N/A		#N/A	#N/A	#N/A
FGFRL1	#N/A	#N/A	#N/A		#N/A	#N/A	#N/A
FIG4	#N/A	#N/A	#N/A		#N/A	#N/A	#N/A
FIS1	#N/A	#N/A	#N/A		#N/A	#N/A	#N/A
FITM1	#N/A	#N/A	#N/A		#N/A	#N/A	#N/A
FITM2	#N/A	#N/A	#N/A		#N/A	#N/A	#N/A
FKBP11	#N/A	#N/A	#N/A		Fkbp11	Fkbp11	Fkbp11
FKBP1A	#N/A	#N/A	#N/A		#N/A	#N/A	#N/A
FKBP8	#N/A	#N/A	#N/A		#N/A	#N/A	#N/A
FKRP	#N/A	#N/A	#N/A		#N/A	#N/A	#N/A
FLRT1	#N/A	#N/A	#N/A		Flrt1	Flrt1	Flrt1
FLRT2	#N/A	#N/A	#N/A		Flrt2	Flrt2	#N/A
FLRT3	#N/A	#N/A	#N/A		Flrt3	#N/A	#N/A
FLT1	#N/A	#N/A	#N/A		#N/A	#N/A	#N/A
FLT3	#N/A	#N/A	#N/A		#N/A	#N/A	#N/A
FLT3LG	#N/A	#N/A	#N/A		#N/A	#N/A	#N/A
FLT4	#N/A	#N/A	#N/A		#N/A	#N/A	#N/A
FLVCR1	#N/A	#N/A	#N/A		#N/A	#N/A	#N/A
FLVCR2	#N/A	#N/A	#N/A		#N/A	#N/A	#N/A
FMNL1	#N/A	#N/A	Fmnl1		#N/A	#N/A	#N/A
FMO1	#N/A	#N/A	#N/A		#N/A	#N/A	#N/A
FMO2	#N/A	#N/A	#N/A		#N/A	#N/A	Fmo2
FMO3	Fmo3	Fmo3	#N/A		#N/A	#N/A	#N/A
FMO4	#N/A	#N/A	#N/A		#N/A	#N/A	#N/A
FMO5	#N/A	#N/A	#N/A		#N/A	#N/A	#N/A
FMR1NB	#N/A	#N/A	#N/A		#N/A	#N/A	#N/A
FNDC10	#N/A	#N/A	#N/A		#N/A	#N/A	#N/A
FNDC3A	#N/A	#N/A	#N/A		#N/A	#N/A	#N/A
FNDC3B	#N/A	#N/A	#N/A		#N/A	#N/A	#N/A
FNDC4	#N/A	#N/A	#N/A		#N/A	#N/A	#N/A
FNDC5	Fndc5	Fndc5	#N/A		#N/A	#N/A	#N/A
FNDC9	#N/A	#N/A	#N/A		#N/A	#N/A	#N/A
FO681492.1	#N/A	#N/A	#N/A		#N/A	#N/A	#N/A
FOCAD	#N/A	#N/A	#N/A		#N/A	#N/A	#N/A
FOLH1	#N/A	#N/A	#N/A		#N/A	#N/A	#N/A
FOLR1	#N/A	#N/A	#N/A		#N/A	#N/A	Folr1
FOLR2	#N/A	#N/A	#N/A		#N/A	Folr2	#N/A
FP565260.3	#N/A	#N/A	#N/A		#N/A	#N/A	#N/A
FPR1	#N/A	#N/A	#N/A		#N/A	#N/A	#N/A
FPR2	#N/A	#N/A	Fpr2		#N/A	#N/A	#N/A
FPR3	#N/A	#N/A	#N/A		#N/A	#N/A	#N/A
FRAS1	#N/A	Fras1	#N/A		#N/A	#N/A	#N/A
FREM2	#N/A	Frem2	#N/A		#N/A	#N/A	#N/A
FRMD3	#N/A	#N/A	#N/A		#N/A	#N/A	Frmd3
FRMD5	#N/A	#N/A	#N/A		#N/A	#N/A	#N/A
FRRS1	#N/A	Frrs1	Frrs1		#N/A	#N/A	#N/A
FRRS1L	#N/A	#N/A	#N/A		#N/A	#N/A	Frrs1l
FSD1L	#N/A	#N/A	#N/A		#N/A	#N/A	#N/A
FSHR	#N/A	#N/A	#N/A		#N/A	#N/A	#N/A
FURIN	#N/A	#N/A	#N/A		#N/A	#N/A	#N/A
FUT1	#N/A	#N/A	#N/A		#N/A	#N/A	#N/A
FUT2	#N/A	#N/A	#N/A		#N/A	#N/A	Fut2
FUT3	#N/A	#N/A	#N/A		#N/A	#N/A	#N/A
FUT4	Fut4	Fut4	#N/A		#N/A	#N/A	#N/A
FUT5	#N/A	#N/A	#N/A		#N/A	#N/A	#N/A
FUT6	#N/A	#N/A	#N/A		#N/A	#N/A	#N/A
FUT8	#N/A	#N/A	#N/A		#N/A	#N/A	Fut8
FUT9	#N/A	#N/A	#N/A		Fut9	Fut9	Fut9
FUZ	#N/A	#N/A	#N/A		#N/A	#N/A	#N/A
FXYD1	#N/A	#N/A	#N/A		#N/A	#N/A	#N/A
FXYD2	#N/A	#N/A	#N/A		#N/A	#N/A	#N/A
FXYD3	Fxyd3	Fxyd3	#N/A		#N/A	#N/A	#N/A
FXYD4	#N/A	#N/A	#N/A		#N/A	#N/A	#N/A
FXYD5	#N/A	#N/A	#N/A		#N/A	#N/A	#N/A
FXYD6	#N/A	#N/A	#N/A		#N/A	#N/A	#N/A
FXYD6-FXYD2	#N/A	#N/A	#N/A		#N/A	#N/A	#N/A
FXYD7	#N/A	#N/A	#N/A		#N/A	#N/A	#N/A
FZD1	#N/A	#N/A	Fzd1		#N/A	#N/A	#N/A
FZD10	#N/A	#N/A	#N/A		#N/A	#N/A	#N/A
FZD2	#N/A	#N/A	#N/A		#N/A	#N/A	#N/A
FZD3	#N/A	#N/A	#N/A		#N/A	#N/A	#N/A
FZD4	#N/A	#N/A	#N/A		#N/A	#N/A	#N/A
FZD5	#N/A	#N/A	#N/A		#N/A	#N/A	#N/A
FZD6	#N/A	#N/A	#N/A		#N/A	#N/A	#N/A
FZD7	#N/A	#N/A	#N/A		#N/A	#N/A	#N/A
FZD8	#N/A	#N/A	#N/A		#N/A	#N/A	#N/A
FZD9	#N/A	#N/A	#N/A		Fzd9	Fzd9	#N/A
G6PC	#N/A	#N/A	#N/A		#N/A	#N/A	#N/A
G6PC2	#N/A	#N/A	#N/A		G6pc2	G6pc2	G6pc2
G6PC3	#N/A	#N/A	#N/A		#N/A	#N/A	#N/A
GABBR1	#N/A	#N/A	#N/A		#N/A	#N/A	#N/A
GABBR2	#N/A	#N/A	#N/A		#N/A	#N/A	#N/A
GABRA1	#N/A	#N/A	#N/A		#N/A	#N/A	#N/A
GABRA2	#N/A	#N/A	#N/A		#N/A	#N/A	#N/A
GABRA3	#N/A	#N/A	#N/A		#N/A	#N/A	#N/A
GABRA4	#N/A	#N/A	#N/A		Gabra4	Gabra4	Gabra4
GABRA5	#N/A	#N/A	#N/A		#N/A	#N/A	#N/A
GABRA6	#N/A	#N/A	#N/A		#N/A	#N/A	#N/A
GABRB1	#N/A	#N/A	#N/A		#N/A	#N/A	#N/A
GABRB2	#N/A	#N/A	#N/A		#N/A	#N/A	#N/A
GABRB3	#N/A	#N/A	#N/A		#N/A	#N/A	#N/A
GABRD	#N/A	#N/A	#N/A		#N/A	#N/A	#N/A
GABRE	Gabre	Gabre	Gabre		#N/A	#N/A	#N/A
GABRG1	#N/A	#N/A	#N/A		#N/A	#N/A	#N/A
GABRG2	#N/A	#N/A	#N/A		#N/A	#N/A	#N/A
GABRG3	#N/A	#N/A	#N/A		#N/A	#N/A	#N/A
GABRP	Gabrp	Gabrp	Gabrp		#N/A	#N/A	#N/A
GABRQ	#N/A	#N/A	#N/A		#N/A	#N/A	#N/A
GABRR1	#N/A	#N/A	#N/A		#N/A	#N/A	#N/A
GABRR2	#N/A	#N/A	#N/A		#N/A	#N/A	#N/A
GABRR3	#N/A	#N/A	#N/A		#N/A	#N/A	#N/A
GAL3ST4	#N/A	#N/A	#N/A		#N/A	#N/A	#N/A
GALC	#N/A	#N/A	#N/A		#N/A	#N/A	#N/A
GALNT1	#N/A	#N/A	#N/A		#N/A	#N/A	#N/A
GALNT11	#N/A	#N/A	#N/A		#N/A	#N/A	#N/A
GALNT14	#N/A	#N/A	#N/A		#N/A	#N/A	#N/A
GALNT18	#N/A	#N/A	#N/A		#N/A	#N/A	Galnt18
GALNT3	Galnt3	Galnt3	Galnt3		#N/A	#N/A	#N/A
GALNT8	#N/A	#N/A	#N/A		#N/A	#N/A	#N/A
GALNT9	#N/A	#N/A	#N/A		Galnt9	Galnt9	Galnt9
GALNTL5	#N/A	#N/A	#N/A		#N/A	#N/A	#N/A
GALR1	#N/A	#N/A	#N/A		#N/A	#N/A	#N/A
GALR2	#N/A	#N/A	Galr2		#N/A	#N/A	#N/A
GALR3	#N/A	#N/A	#N/A		#N/A	#N/A	#N/A
GCGR	#N/A	#N/A	#N/A		#N/A	#N/A	#N/A
GCNT2	#N/A	#N/A	#N/A		#N/A	#N/A	#N/A
GCNT3	Gcnt3	Gcnt3	Gcnt3		#N/A	#N/A	#N/A
GCSAML-AS1	#N/A	#N/A	#N/A		#N/A	#N/A	#N/A
GDAP1	#N/A	#N/A	#N/A		#N/A	#N/A	#N/A
GDAP1L1	#N/A	#N/A	#N/A		#N/A	#N/A	#N/A
GDE1	Gde1	Gde1	#N/A		#N/A	#N/A	#N/A
GDPD1	Gdpd1	Gdpd1	#N/A		#N/A	#N/A	#N/A
GDPD2	#N/A	#N/A	Gdpd2		#N/A	#N/A	#N/A
GDPD3	#N/A	#N/A	#N/A		#N/A	#N/A	#N/A
GDPD4	#N/A	#N/A	#N/A		#N/A	#N/A	#N/A
GDPD5	#N/A	#N/A	#N/A		#N/A	#N/A	Gdpd5
GFPT1	#N/A	#N/A	#N/A		#N/A	#N/A	#N/A
GFPT2	#N/A	#N/A	#N/A		#N/A	#N/A	#N/A
GFRA1	#N/A	#N/A	#N/A		#N/A	#N/A	#N/A
GFRA3	#N/A	#N/A	#N/A		Gfra3	Gfra3	Gfra3
GFRAL	#N/A	#N/A	#N/A		#N/A	#N/A	#N/A
GFY	#N/A	#N/A	#N/A		#N/A	#N/A	#N/A
GGCX	#N/A	#N/A	#N/A		#N/A	#N/A	#N/A
GGT1	#N/A	#N/A	#N/A		Ggt1	Ggt1	Ggt1
GGT2	#N/A	#N/A	#N/A		#N/A	#N/A	#N/A
GGT6	Ggt6	Ggt6	Ggt6		#N/A	#N/A	#N/A
GGT7	#N/A	#N/A	#N/A		#N/A	#N/A	#N/A
GHITM	#N/A	#N/A	#N/A		#N/A	#N/A	#N/A
GHR	#N/A	#N/A	#N/A		#N/A	#N/A	#N/A
GHRHR	#N/A	#N/A	#N/A		#N/A	#N/A	#N/A
GHSR	#N/A	#N/A	#N/A		#N/A	#N/A	#N/A
GIMAP1	#N/A	#N/A	Gimap1		#N/A	#N/A	#N/A
GIMAP1-GIMAP5	#N/A	#N/A	#N/A		#N/A	#N/A	#N/A
GIMAP2	#N/A	#N/A	#N/A		#N/A	#N/A	#N/A
GIMAP5	#N/A	#N/A	#N/A		#N/A	#N/A	#N/A
GINM1	#N/A	#N/A	#N/A		#N/A	#N/A	#N/A
GIPR	#N/A	#N/A	#N/A		#N/A	#N/A	#N/A
GJA1	#N/A	#N/A	#N/A		#N/A	#N/A	#N/A
GJA10	#N/A	#N/A	#N/A		#N/A	#N/A	#N/A
GJA3	#N/A	#N/A	#N/A		#N/A	#N/A	#N/A
GJA4	#N/A	#N/A	#N/A		#N/A	#N/A	#N/A
GJA5	#N/A	#N/A	Gja5		#N/A	#N/A	#N/A
GJA8	#N/A	#N/A	#N/A		#N/A	#N/A	#N/A
GJA9	#N/A	#N/A	#N/A		#N/A	#N/A	#N/A
GJB1	#N/A	#N/A	#N/A		#N/A	#N/A	Gjb1
GJB2	Gjb2	Gjb2	#N/A		#N/A	#N/A	#N/A
GJB3	#N/A	#N/A	#N/A		#N/A	#N/A	#N/A
GJB4	Gjb4	Gjb4	Gjb4		#N/A	#N/A	#N/A
GJB5	#N/A	#N/A	#N/A		#N/A	#N/A	#N/A
GJB6	Gjb6	Gjb6	#N/A		#N/A	#N/A	#N/A
GJB7	#N/A	#N/A	#N/A		#N/A	#N/A	#N/A
GJC1	#N/A	#N/A	#N/A		#N/A	Gjc1	#N/A
GJC2	#N/A	#N/A	#N/A		#N/A	#N/A	#N/A
GJC3	#N/A	#N/A	#N/A		#N/A	#N/A	Gjc3
GJD2	#N/A	#N/A	#N/A		#N/A	#N/A	#N/A
GJD3	#N/A	#N/A	#N/A		#N/A	#N/A	#N/A
GJD4	#N/A	#N/A	#N/A		#N/A	#N/A	#N/A
GJE1	#N/A	#N/A	#N/A		#N/A	#N/A	#N/A
GK	#N/A	#N/A	#N/A		#N/A	#N/A	#N/A
GK2	#N/A	#N/A	#N/A		#N/A	#N/A	#N/A
GK3P	#N/A	#N/A	#N/A		#N/A	#N/A	#N/A
GLCCI1	#N/A	#N/A	#N/A		#N/A	#N/A	#N/A
GLG1	#N/A	#N/A	#N/A		#N/A	#N/A	#N/A
GLIPR1	#N/A	#N/A	#N/A		#N/A	#N/A	#N/A
GLIPR1L2	#N/A	#N/A	#N/A		#N/A	#N/A	#N/A
GLMP	#N/A	#N/A	#N/A		#N/A	#N/A	#N/A
GLP1R	#N/A	#N/A	#N/A		#N/A	#N/A	#N/A
GLP2R	#N/A	#N/A	#N/A		#N/A	#N/A	#N/A
GLRA1	#N/A	#N/A	#N/A		#N/A	#N/A	#N/A
GLRA2	#N/A	#N/A	#N/A		#N/A	#N/A	#N/A
GLRA3	#N/A	#N/A	#N/A		#N/A	#N/A	#N/A
GLRA4	#N/A	#N/A	#N/A		#N/A	#N/A	#N/A
GLRB	#N/A	#N/A	#N/A		#N/A	#N/A	#N/A
GLT8D1	#N/A	#N/A	#N/A		#N/A	#N/A	#N/A
GNE	Gne	Gne	#N/A		#N/A	#N/A	#N/A
GNPTAB	#N/A	#N/A	#N/A		#N/A	#N/A	#N/A
GNRHR	#N/A	#N/A	#N/A		#N/A	#N/A	#N/A
GOLGA5	#N/A	#N/A	#N/A		#N/A	#N/A	#N/A
GOLGB1	#N/A	#N/A	#N/A		#N/A	#N/A	#N/A
GOLIM4	#N/A	#N/A	#N/A		#N/A	#N/A	#N/A
GOLT1A	#N/A	#N/A	#N/A		#N/A	#N/A	#N/A
GOLT1B	#N/A	#N/A	#N/A		#N/A	#N/A	#N/A
GOSR1	#N/A	#N/A	#N/A		#N/A	#N/A	#N/A
GOSR2	#N/A	#N/A	#N/A		#N/A	#N/A	#N/A
GP1BA	#N/A	#N/A	#N/A		#N/A	#N/A	#N/A
GP1BB	#N/A	#N/A	#N/A		#N/A	#N/A	#N/A
GP2	Gp2	Gp2	#N/A		#N/A	#N/A	#N/A
GP5	#N/A	#N/A	#N/A		#N/A	#N/A	#N/A
GP6	#N/A	#N/A	#N/A		#N/A	#N/A	#N/A
GP9	#N/A	#N/A	#N/A		#N/A	#N/A	#N/A
GPA33	Gpa33	Gpa33	Gpa33		#N/A	#N/A	#N/A
GPAA1	#N/A	#N/A	#N/A		#N/A	#N/A	#N/A
GPAM	#N/A	#N/A	#N/A		#N/A	#N/A	#N/A
GPAT2	#N/A	#N/A	#N/A		#N/A	#N/A	#N/A
GPAT3	#N/A	#N/A	#N/A		#N/A	#N/A	#N/A
GPAT4	#N/A	#N/A	#N/A		#N/A	#N/A	#N/A
GPBAR1	#N/A	#N/A	#N/A		#N/A	#N/A	#N/A
GPC1	#N/A	#N/A	Gpc1		#N/A	#N/A	#N/A
GPC3	#N/A	#N/A	#N/A		#N/A	#N/A	#N/A
GPC4	#N/A	#N/A	Gpc4		#N/A	#N/A	#N/A
GPER1	#N/A	#N/A	#N/A		#N/A	#N/A	#N/A
GPI	#N/A	#N/A	#N/A		#N/A	#N/A	#N/A
GPM6A	#N/A	#N/A	#N/A		#N/A	#N/A	#N/A
GPM6B	#N/A	#N/A	#N/A		#N/A	#N/A	#N/A
GPNMB	#N/A	#N/A	#N/A		#N/A	#N/A	#N/A
GPR1	#N/A	#N/A	#N/A		#N/A	#N/A	#N/A
GPR101	#N/A	#N/A	#N/A		#N/A	#N/A	#N/A
GPR107	#N/A	#N/A	#N/A		#N/A	#N/A	#N/A
GPR108	#N/A	#N/A	#N/A		#N/A	#N/A	#N/A
GPR119	#N/A	#N/A	#N/A		#N/A	#N/A	#N/A
GPR12	#N/A	#N/A	#N/A		#N/A	#N/A	#N/A
GPR132	#N/A	#N/A	#N/A		#N/A	#N/A	#N/A
GPR135	#N/A	#N/A	#N/A		#N/A	#N/A	#N/A
GPR137	#N/A	#N/A	#N/A		#N/A	#N/A	#N/A
GPR137B	#N/A	#N/A	Gpr137b		#N/A	#N/A	#N/A
GPR137C	#N/A	#N/A	#N/A		#N/A	#N/A	#N/A
GPR139	#N/A	#N/A	#N/A		#N/A	#N/A	#N/A
GPR141	#N/A	#N/A	Gpr141		#N/A	#N/A	#N/A
GPR142	#N/A	#N/A	#N/A		#N/A	#N/A	#N/A
GPR143	#N/A	#N/A	#N/A		#N/A	#N/A	#N/A
GPR146	#N/A	#N/A	#N/A		#N/A	#N/A	#N/A
GPR148	#N/A	#N/A	#N/A		#N/A	#N/A	#N/A
GPR149	#N/A	#N/A	#N/A		#N/A	#N/A	#N/A
GPR15	#N/A	#N/A	#N/A		#N/A	#N/A	#N/A
GPR150	#N/A	#N/A	#N/A		#N/A	#N/A	#N/A
GPR151	#N/A	#N/A	#N/A		#N/A	#N/A	#N/A
GPR152	#N/A	#N/A	#N/A		#N/A	#N/A	#N/A
GPR153	#N/A	#N/A	#N/A		#N/A	#N/A	#N/A
GPR155	#N/A	#N/A	#N/A		#N/A	#N/A	Gpr155
GPR156	#N/A	#N/A	#N/A		#N/A	#N/A	#N/A
GPR157	#N/A	#N/A	#N/A		#N/A	#N/A	#N/A
GPR158	#N/A	#N/A	#N/A		#N/A	#N/A	#N/A
GPR160	#N/A	#N/A	#N/A		#N/A	#N/A	#N/A
GPR161	#N/A	#N/A	#N/A		#N/A	#N/A	#N/A
GPR162	#N/A	#N/A	#N/A		#N/A	#N/A	#N/A
GPR17	#N/A	#N/A	#N/A		#N/A	#N/A	#N/A
GPR171	#N/A	#N/A	Gpr171		#N/A	#N/A	#N/A
GPR173	#N/A	#N/A	#N/A		#N/A	#N/A	#N/A
GPR174	#N/A	#N/A	#N/A		#N/A	#N/A	#N/A
GPR176	#N/A	#N/A	Gpr176		#N/A	#N/A	#N/A
GPR179	#N/A	#N/A	#N/A		#N/A	#N/A	#N/A
GPR18	#N/A	#N/A	#N/A		#N/A	#N/A	#N/A
GPR180	#N/A	#N/A	#N/A		#N/A	#N/A	#N/A
GPR182	#N/A	#N/A	#N/A		#N/A	#N/A	#N/A
GPR183	#N/A	#N/A	Gpr183		#N/A	#N/A	#N/A
GPR19	#N/A	#N/A	#N/A		#N/A	#N/A	#N/A
GPR20	#N/A	#N/A	#N/A		#N/A	#N/A	#N/A
GPR21	#N/A	#N/A	#N/A		#N/A	#N/A	#N/A
GPR22	#N/A	#N/A	#N/A		#N/A	#N/A	Gpr22
GPR25	#N/A	#N/A	#N/A		#N/A	#N/A	#N/A
GPR26	#N/A	#N/A	#N/A		#N/A	#N/A	#N/A
GPR27	#N/A	#N/A	#N/A		#N/A	#N/A	#N/A
GPR3	#N/A	#N/A	#N/A		#N/A	#N/A	#N/A
GPR31	#N/A	#N/A	#N/A		#N/A	#N/A	#N/A
GPR32	#N/A	#N/A	#N/A		#N/A	#N/A	#N/A
GPR33	#N/A	#N/A	#N/A		#N/A	#N/A	#N/A
GPR34	#N/A	#N/A	#N/A		#N/A	#N/A	#N/A
GPR35	#N/A	Gpr35	Gpr35		#N/A	#N/A	#N/A
GPR37	#N/A	#N/A	#N/A		#N/A	#N/A	#N/A
GPR37L1	#N/A	#N/A	#N/A		Gpr37l1	Gpr37l1	Gpr37l1
GPR39	#N/A	Gpr39	#N/A		#N/A	#N/A	#N/A
GPR4	#N/A	#N/A	#N/A		#N/A	#N/A	#N/A
GPR42	#N/A	#N/A	#N/A		#N/A	#N/A	#N/A
GPR45	#N/A	#N/A	#N/A		#N/A	#N/A	#N/A
GPR50	#N/A	#N/A	#N/A		#N/A	#N/A	#N/A
GPR52	#N/A	#N/A	#N/A		#N/A	#N/A	#N/A
GPR55	#N/A	#N/A	#N/A		#N/A	#N/A	#N/A
GPR6	#N/A	#N/A	#N/A		#N/A	#N/A	#N/A
GPR61	#N/A	#N/A	#N/A		#N/A	#N/A	#N/A
GPR62	#N/A	#N/A	#N/A		#N/A	#N/A	#N/A
GPR63	#N/A	#N/A	#N/A		#N/A	#N/A	#N/A
GPR65	#N/A	#N/A	Gpr65		#N/A	#N/A	#N/A
GPR68	#N/A	#N/A	#N/A		#N/A	#N/A	#N/A
GPR75	#N/A	#N/A	#N/A		#N/A	#N/A	#N/A
GPR78	#N/A	#N/A	#N/A		#N/A	#N/A	#N/A
GPR82	#N/A	#N/A	#N/A		#N/A	#N/A	#N/A
GPR83	Gpr83	Gpr83	#N/A		#N/A	#N/A	Gpr83
GPR84	#N/A	#N/A	Gpr84		#N/A	#N/A	#N/A
GPR85	#N/A	#N/A	#N/A		#N/A	#N/A	#N/A
GPR87	#N/A	Gpr87	Gpr87		#N/A	#N/A	#N/A
GPR88	#N/A	#N/A	#N/A		#N/A	#N/A	#N/A
GPR89A	#N/A	#N/A	#N/A		#N/A	#N/A	#N/A
GPR89B	#N/A	#N/A	#N/A		#N/A	#N/A	#N/A
GPRC5A	Gprc5a	Gprc5a	Gprc5a		#N/A	#N/A	#N/A
GPRC5B	#N/A	#N/A	#N/A		#N/A	#N/A	#N/A
GPRC5C	#N/A	#N/A	#N/A		#N/A	#N/A	#N/A
GPRC5D	#N/A	#N/A	#N/A		#N/A	#N/A	#N/A
GPRC6A	#N/A	#N/A	#N/A		#N/A	#N/A	#N/A
GPSM2	#N/A	#N/A	#N/A		#N/A	#N/A	#N/A
GRAMD1A	#N/A	#N/A	#N/A		#N/A	#N/A	#N/A
GRAMD1B	#N/A	#N/A	#N/A		#N/A	#N/A	#N/A
GRAMD1C	#N/A	#N/A	#N/A		#N/A	#N/A	#N/A
GRAMD2A	#N/A	#N/A	#N/A		#N/A	#N/A	#N/A
GRAMD2B	#N/A	#N/A	#N/A		#N/A	#N/A	#N/A
GRAMD4	#N/A	#N/A	#N/A		#N/A	#N/A	#N/A
GREB1	#N/A	#N/A	#N/A		Greb1	Greb1	Greb1
GRIA1	#N/A	#N/A	#N/A		Gria1	Gria1	Gria1
GRIA2	#N/A	#N/A	#N/A		#N/A	#N/A	#N/A
GRIA3	#N/A	#N/A	#N/A		#N/A	#N/A	#N/A
GRIA4	#N/A	#N/A	#N/A		#N/A	#N/A	#N/A
GRID1	#N/A	#N/A	#N/A		#N/A	#N/A	#N/A
GRID2	Grid2	Grid2	#N/A		#N/A	#N/A	#N/A
GRIK1	#N/A	#N/A	#N/A		#N/A	#N/A	#N/A
GRIK2	#N/A	#N/A	#N/A		#N/A	#N/A	#N/A
GRIK3	#N/A	#N/A	#N/A		#N/A	#N/A	Grik3
GRIK4	#N/A	#N/A	#N/A		Grik4	Grik4	#N/A
GRIK5	#N/A	#N/A	#N/A		#N/A	#N/A	#N/A
GRIN1	Grin1	Grin1	#N/A		#N/A	#N/A	#N/A
GRIN2A	#N/A	#N/A	#N/A		#N/A	#N/A	#N/A
GRIN2B	#N/A	#N/A	#N/A		#N/A	#N/A	#N/A
GRIN2C	#N/A	#N/A	#N/A		#N/A	#N/A	#N/A
GRIN2D	#N/A	#N/A	#N/A		#N/A	#N/A	#N/A
GRIN3A	#N/A	#N/A	#N/A		#N/A	#N/A	#N/A
GRIN3B	#N/A	#N/A	#N/A		#N/A	#N/A	#N/A
GRINA	#N/A	#N/A	#N/A		#N/A	#N/A	#N/A
GRM1	#N/A	#N/A	#N/A		#N/A	#N/A	#N/A
GRM2	#N/A	#N/A	#N/A		#N/A	#N/A	#N/A
GRM3	#N/A	#N/A	#N/A		#N/A	#N/A	#N/A
GRM4	#N/A	#N/A	#N/A		#N/A	#N/A	#N/A
GRM5	#N/A	#N/A	#N/A		#N/A	#N/A	#N/A
GRM6	#N/A	#N/A	#N/A		#N/A	#N/A	#N/A
GRM7	#N/A	#N/A	#N/A		#N/A	#N/A	#N/A
GRM8	#N/A	#N/A	#N/A		#N/A	#N/A	#N/A
GRPR	#N/A	#N/A	#N/A		#N/A	#N/A	#N/A
GSG1	#N/A	#N/A	#N/A		#N/A	#N/A	#N/A
GSG1L	#N/A	#N/A	#N/A		#N/A	#N/A	#N/A
GSG1L2	#N/A	#N/A	#N/A		#N/A	#N/A	#N/A
GSTCD	#N/A	#N/A	#N/A		#N/A	#N/A	#N/A
GTF3C1	#N/A	#N/A	#N/A		#N/A	#N/A	#N/A
GTF3C3	#N/A	#N/A	#N/A		#N/A	#N/A	#N/A
GUCY2C	#N/A	#N/A	#N/A		#N/A	#N/A	#N/A
GUCY2D	#N/A	#N/A	#N/A		#N/A	#N/A	#N/A
GUCY2F	#N/A	#N/A	#N/A		#N/A	#N/A	#N/A
GULP1	#N/A	#N/A	#N/A		#N/A	#N/A	#N/A
GYPA	#N/A	#N/A	#N/A		#N/A	#N/A	#N/A
GYPB	#N/A	#N/A	#N/A		#N/A	#N/A	#N/A
GYPC	#N/A	#N/A	#N/A		#N/A	#N/A	#N/A
GYPE	#N/A	#N/A	#N/A		#N/A	#N/A	#N/A
HACD1	#N/A	#N/A	#N/A		#N/A	#N/A	#N/A
HACD2	#N/A	#N/A	#N/A		#N/A	#N/A	#N/A
HACD3	#N/A	#N/A	#N/A		#N/A	#N/A	#N/A
HACD4	#N/A	#N/A	#N/A		#N/A	#N/A	#N/A
HAPLN3	#N/A	#N/A	#N/A		#N/A	#N/A	#N/A
HAS1	#N/A	#N/A	#N/A		#N/A	#N/A	#N/A
HAS2	#N/A	#N/A	#N/A		#N/A	#N/A	#N/A
HAS3	Has3	Has3	Has3		#N/A	#N/A	#N/A
HAVCR1	#N/A	#N/A	#N/A		#N/A	Havcr1	Havcr1
HAVCR2	#N/A	#N/A	#N/A		#N/A	#N/A	#N/A
HBD	#N/A	#N/A	#N/A		#N/A	#N/A	#N/A
HBEGF	#N/A	#N/A	#N/A		#N/A	#N/A	#N/A
HBS1L	#N/A	#N/A	#N/A		#N/A	#N/A	#N/A
HCAR1	#N/A	#N/A	#N/A		#N/A	#N/A	#N/A
HCAR2	#N/A	#N/A	#N/A		#N/A	#N/A	#N/A
HCAR3	#N/A	#N/A	#N/A		#N/A	#N/A	#N/A
HCN1	#N/A	#N/A	#N/A		#N/A	#N/A	#N/A
HCN2	#N/A	#N/A	#N/A		#N/A	#N/A	#N/A
HCN3	#N/A	#N/A	#N/A		#N/A	#N/A	#N/A
HCN4	#N/A	#N/A	#N/A		#N/A	#N/A	#N/A
HCRTR1	#N/A	#N/A	#N/A		#N/A	#N/A	#N/A
HCRTR2	#N/A	#N/A	#N/A		#N/A	#N/A	#N/A
HCST	#N/A	#N/A	Hcst		#N/A	#N/A	#N/A
HDAC10	#N/A	#N/A	#N/A		#N/A	#N/A	#N/A
HEATR5A	#N/A	#N/A	#N/A		#N/A	#N/A	#N/A
HECTD4	#N/A	#N/A	#N/A		#N/A	#N/A	#N/A
HEG1	#N/A	#N/A	#N/A		#N/A	#N/A	#N/A
HELZ	#N/A	#N/A	#N/A		#N/A	#N/A	#N/A
HEPACAM	#N/A	#N/A	#N/A		#N/A	#N/A	#N/A
HEPACAM2	Hepacam2	Hepacam2	#N/A		#N/A	#N/A	#N/A
HEPH	#N/A	#N/A	Heph		#N/A	#N/A	#N/A
HEPHL1	#N/A	#N/A	#N/A		#N/A	#N/A	#N/A
HERC2	#N/A	#N/A	#N/A		#N/A	#N/A	#N/A
HERC4	#N/A	#N/A	#N/A		#N/A	#N/A	#N/A
HERC5	#N/A	#N/A	#N/A		#N/A	#N/A	#N/A
HERC6	#N/A	#N/A	#N/A		#N/A	#N/A	#N/A
HERPUD1	#N/A	#N/A	#N/A		#N/A	#N/A	Herpud1
HERPUD2	#N/A	#N/A	#N/A		#N/A	#N/A	#N/A
HFE	#N/A	#N/A	#N/A		#N/A	#N/A	#N/A
HFE2	#N/A	#N/A	#N/A		#N/A	#N/A	#N/A
HGSNAT	#N/A	#N/A	#N/A		#N/A	#N/A	#N/A
HHAT	#N/A	#N/A	Hhat		#N/A	#N/A	#N/A
HHATL	#N/A	#N/A	#N/A		#N/A	#N/A	#N/A
HHIP	#N/A	#N/A	#N/A		Hhip	Hhip	Hhip
HHLA2	#N/A	#N/A	#N/A		#N/A	#N/A	#N/A
HIGD1A	#N/A	#N/A	#N/A		#N/A	#N/A	#N/A
HIGD1B	#N/A	#N/A	Higd1b		#N/A	#N/A	#N/A
HIGD1C	#N/A	#N/A	#N/A		#N/A	#N/A	#N/A
HIGD2A	#N/A	#N/A	#N/A		#N/A	#N/A	#N/A
HIGD2B	#N/A	#N/A	#N/A		#N/A	#N/A	#N/A
HILPDA	#N/A	#N/A	Hilpda		#N/A	#N/A	#N/A
HIPK1	#N/A	#N/A	#N/A		#N/A	#N/A	#N/A
HIPK2	#N/A	#N/A	#N/A		#N/A	#N/A	#N/A
HIPK3	#N/A	#N/A	#N/A		#N/A	#N/A	#N/A
HLA-A	#N/A	#N/A	#N/A		#N/A	#N/A	#N/A
HLA-B	#N/A	#N/A	#N/A		#N/A	#N/A	#N/A
HLA-C	#N/A	#N/A	#N/A		#N/A	#N/A	#N/A
HLA-DMA	#N/A	#N/A	#N/A		#N/A	#N/A	#N/A
HLA-DMB	#N/A	#N/A	#N/A		#N/A	#N/A	#N/A
HLA-DOA	#N/A	#N/A	#N/A		#N/A	#N/A	#N/A
HLA-DOB	#N/A	#N/A	#N/A		#N/A	#N/A	#N/A
HLA-DPA1	#N/A	#N/A	#N/A		#N/A	#N/A	#N/A
HLA-DPB1	#N/A	#N/A	#N/A		#N/A	#N/A	#N/A
HLA-DQA1	#N/A	#N/A	#N/A		#N/A	#N/A	#N/A
HLA-DQA2	#N/A	#N/A	#N/A		#N/A	#N/A	#N/A
HLA-DQB1	#N/A	#N/A	#N/A		#N/A	#N/A	#N/A
HLA-DQB2	#N/A	#N/A	#N/A		#N/A	#N/A	#N/A
HLA-DRA	#N/A	#N/A	#N/A		#N/A	#N/A	#N/A
HLA-DRB1	#N/A	#N/A	#N/A		#N/A	#N/A	#N/A
HLA-DRB5	#N/A	#N/A	#N/A		#N/A	#N/A	#N/A
HLA-E	#N/A	#N/A	#N/A		#N/A	#N/A	#N/A
HLA-F	#N/A	#N/A	#N/A		#N/A	#N/A	#N/A
HLA-G	#N/A	#N/A	#N/A		#N/A	#N/A	#N/A
HM13	#N/A	#N/A	#N/A		#N/A	#N/A	#N/A
HMGCR	#N/A	#N/A	#N/A		#N/A	#N/A	#N/A
HMOX1	#N/A	#N/A	Hmox1		#N/A	#N/A	#N/A
HMOX2	#N/A	#N/A	#N/A		#N/A	#N/A	#N/A
HOXC11	#N/A	#N/A	#N/A		#N/A	#N/A	#N/A
HPN	Hpn	Hpn	#N/A		#N/A	#N/A	#N/A
HPS3	#N/A	#N/A	#N/A		#N/A	#N/A	#N/A
HRASLS	#N/A	#N/A	#N/A		#N/A	#N/A	#N/A
HRASLS2	#N/A	#N/A	#N/A		#N/A	#N/A	#N/A
HRH1	#N/A	#N/A	#N/A		#N/A	#N/A	#N/A
HRH2	#N/A	#N/A	#N/A		#N/A	#N/A	#N/A
HRH3	#N/A	#N/A	#N/A		#N/A	#N/A	#N/A
HRH4	#N/A	#N/A	#N/A		#N/A	#N/A	#N/A
HRK	#N/A	#N/A	#N/A		#N/A	#N/A	#N/A
HS3ST4	#N/A	#N/A	#N/A		#N/A	#N/A	#N/A
HS6ST2	#N/A	#N/A	#N/A		#N/A	#N/A	#N/A
HSD11B1L	#N/A	#N/A	#N/A		#N/A	#N/A	#N/A
HSD11B2	Hsd11b2	Hsd11b2	Hsd11b2		#N/A	#N/A	#N/A
HSD17B12	#N/A	#N/A	#N/A		#N/A	#N/A	#N/A
HSD17B2	#N/A	#N/A	#N/A		#N/A	#N/A	#N/A
HSD17B3	#N/A	#N/A	#N/A		#N/A	#N/A	#N/A
HSD17B7	#N/A	#N/A	#N/A		#N/A	#N/A	#N/A
HSD3B1	#N/A	#N/A	#N/A		#N/A	#N/A	#N/A
HSD3B2	#N/A	#N/A	#N/A		#N/A	#N/A	#N/A
HSD3B7	#N/A	#N/A	Hsd3b7		#N/A	#N/A	#N/A
HSDL1	#N/A	#N/A	#N/A		#N/A	#N/A	#N/A
HTATIP2	#N/A	#N/A	#N/A		#N/A	#N/A	#N/A
HTR1A	#N/A	#N/A	#N/A		#N/A	#N/A	#N/A
HTR1B	#N/A	#N/A	#N/A		#N/A	#N/A	#N/A
HTR1D	Htr1d	Htr1d	#N/A		#N/A	#N/A	#N/A
HTR1E	#N/A	#N/A	#N/A		#N/A	#N/A	#N/A
HTR1F	#N/A	#N/A	#N/A		#N/A	#N/A	#N/A
HTR2A	#N/A	#N/A	#N/A		#N/A	#N/A	#N/A
HTR2B	#N/A	#N/A	#N/A		#N/A	#N/A	#N/A
HTR2C	#N/A	#N/A	#N/A		#N/A	#N/A	#N/A
HTR3A	#N/A	#N/A	#N/A		#N/A	#N/A	#N/A
HTR3B	#N/A	#N/A	#N/A		#N/A	#N/A	Htr3b
HTR3C	#N/A	#N/A	#N/A		#N/A	#N/A	#N/A
HTR3D	#N/A	#N/A	#N/A		#N/A	#N/A	#N/A
HTR3E	#N/A	#N/A	#N/A		#N/A	#N/A	#N/A
HTR4	#N/A	#N/A	#N/A		#N/A	#N/A	#N/A
HTR5A	#N/A	#N/A	#N/A		#N/A	#N/A	#N/A
HTR6	#N/A	#N/A	#N/A		#N/A	#N/A	#N/A
HTR7	#N/A	#N/A	#N/A		#N/A	#N/A	#N/A
HTRA2	#N/A	#N/A	Htra2		#N/A	#N/A	#N/A
HTT	#N/A	#N/A	#N/A		#N/A	#N/A	#N/A
HUWE1	#N/A	#N/A	#N/A		#N/A	#N/A	#N/A
HVCN1	#N/A	#N/A	#N/A		#N/A	#N/A	#N/A
HYAL2	#N/A	#N/A	#N/A		#N/A	#N/A	#N/A
HYAL4	#N/A	#N/A	#N/A		#N/A	#N/A	#N/A
ICA1	#N/A	#N/A	#N/A		#N/A	#N/A	Ica1
ICAM1	Icam1	Icam1	Icam1		#N/A	#N/A	#N/A
ICAM2	#N/A	#N/A	#N/A		#N/A	#N/A	#N/A
ICAM3	#N/A	#N/A	#N/A		#N/A	#N/A	#N/A
ICAM4	#N/A	#N/A	#N/A		#N/A	#N/A	#N/A
ICAM5	#N/A	#N/A	Icam5		#N/A	#N/A	#N/A
ICMT	#N/A	#N/A	#N/A		#N/A	#N/A	#N/A
ICOS	#N/A	#N/A	#N/A		#N/A	#N/A	#N/A
ICOSLG	#N/A	#N/A	#N/A		#N/A	#N/A	#N/A
IER3	#N/A	#N/A	Ier3		#N/A	#N/A	#N/A
IER3IP1	#N/A	#N/A	#N/A		#N/A	#N/A	#N/A
IFI27	#N/A	#N/A	#N/A		#N/A	#N/A	#N/A
IFI30	#N/A	#N/A	#N/A		#N/A	#N/A	#N/A
IFI6	#N/A	#N/A	#N/A		#N/A	#N/A	#N/A
IFITM1	#N/A	#N/A	#N/A		#N/A	#N/A	#N/A
IFITM10	#N/A	#N/A	#N/A		Ifitm10	Ifitm10	Ifitm10
IFITM2	#N/A	#N/A	Ifitm2		#N/A	#N/A	#N/A
IFITM3	#N/A	Ifitm3	Ifitm3		#N/A	#N/A	#N/A
IFITM5	#N/A	#N/A	Ifitm5		#N/A	#N/A	#N/A
IFNAR1	#N/A	#N/A	#N/A		#N/A	#N/A	#N/A
IFNAR2	#N/A	#N/A	#N/A		#N/A	#N/A	#N/A
IFNGR1	#N/A	#N/A	#N/A		#N/A	#N/A	#N/A
IFNGR2	Ifngr2	#N/A	#N/A		#N/A	#N/A	#N/A
[truncated: 3,522 more rows]

## Sheet: LP
Protein Class	PTEN - Up				PTEN - Down
Gene	PIN	MED	ADV		PIN	MED	ADV
A3GALT2	#N/A	#N/A	#N/A		#N/A	A3galt2	A3galt2
A4GALT	#N/A	#N/A	#N/A		#N/A	#N/A	A4galt
AACS	#N/A	#N/A	#N/A		#N/A	#N/A	#N/A
AADACL3	Aadacl3	Aadacl3	#N/A		#N/A	#N/A	#N/A
AADACL4	#N/A	#N/A	#N/A		#N/A	#N/A	#N/A
AASDH	#N/A	#N/A	#N/A		#N/A	#N/A	#N/A
AATK	#N/A	#N/A	#N/A		#N/A	#N/A	#N/A
ABCA1	#N/A	#N/A	#N/A		#N/A	#N/A	#N/A
ABCA10	#N/A	#N/A	#N/A		#N/A	#N/A	#N/A
ABCA12	#N/A	#N/A	#N/A		#N/A	#N/A	#N/A
ABCA13	#N/A	#N/A	#N/A		#N/A	#N/A	#N/A
ABCA2	#N/A	#N/A	#N/A		#N/A	#N/A	#N/A
ABCA3	#N/A	#N/A	#N/A		#N/A	#N/A	#N/A
ABCA4	#N/A	#N/A	#N/A		#N/A	#N/A	#N/A
ABCA5	#N/A	#N/A	#N/A		Abca5	Abca5	Abca5
ABCA6	#N/A	#N/A	#N/A		Abca6	#N/A	#N/A
ABCA7	#N/A	#N/A	#N/A		#N/A	#N/A	#N/A
ABCA8	#N/A	#N/A	#N/A		#N/A	#N/A	#N/A
ABCA9	#N/A	#N/A	#N/A		Abca9	#N/A	#N/A
ABCB1	#N/A	#N/A	#N/A		#N/A	#N/A	#N/A
ABCB10	#N/A	#N/A	#N/A		#N/A	#N/A	#N/A
ABCB11	#N/A	#N/A	#N/A		#N/A	#N/A	#N/A
ABCB4	#N/A	#N/A	#N/A		#N/A	#N/A	#N/A
ABCB5	#N/A	#N/A	#N/A		#N/A	#N/A	#N/A
ABCB6	#N/A	#N/A	#N/A		Abcb6	Abcb6	#N/A
ABCB7	#N/A	#N/A	#N/A		#N/A	#N/A	#N/A
ABCB8	#N/A	#N/A	#N/A		#N/A	#N/A	#N/A
ABCB9	#N/A	#N/A	#N/A		#N/A	#N/A	#N/A
ABCC1	#N/A	#N/A	#N/A		#N/A	#N/A	#N/A
ABCC10	#N/A	#N/A	#N/A		#N/A	#N/A	#N/A
ABCC11	#N/A	#N/A	#N/A		#N/A	#N/A	#N/A
ABCC12	#N/A	#N/A	#N/A		#N/A	Abcc12	#N/A
ABCC2	#N/A	#N/A	#N/A		#N/A	#N/A	#N/A
ABCC3	#N/A	#N/A	#N/A		#N/A	#N/A	#N/A
ABCC4	#N/A	#N/A	#N/A		#N/A	#N/A	#N/A
ABCC5	Abcc5	Abcc5	Abcc5		#N/A	#N/A	#N/A
ABCC6	#N/A	#N/A	#N/A		#N/A	#N/A	#N/A
ABCC8	#N/A	#N/A	Abcc8		#N/A	#N/A	#N/A
ABCC9	#N/A	#N/A	#N/A		Abcc9	#N/A	#N/A
ABCD1	#N/A	#N/A	#N/A		#N/A	#N/A	#N/A
ABCD2	#N/A	#N/A	#N/A		#N/A	#N/A	#N/A
ABCD3	#N/A	#N/A	#N/A		#N/A	#N/A	#N/A
ABCD4	#N/A	Abcd4	#N/A		#N/A	#N/A	#N/A
ABCG1	Abcg1	Abcg1	Abcg1		#N/A	#N/A	#N/A
ABCG2	#N/A	#N/A	#N/A		#N/A	#N/A	#N/A
ABCG4	#N/A	#N/A	#N/A		#N/A	#N/A	#N/A
ABCG5	Abcg5	Abcg5	Abcg5		#N/A	#N/A	#N/A
ABCG8	Abcg8	Abcg8	Abcg8		#N/A	#N/A	#N/A
ABHD1	#N/A	#N/A	#N/A		#N/A	#N/A	#N/A
ABHD12	#N/A	#N/A	#N/A		#N/A	Abhd12	Abhd12
ABHD13	#N/A	#N/A	#N/A		#N/A	#N/A	#N/A
ABHD14A	#N/A	#N/A	#N/A		Abhd14a	#N/A	#N/A
ABHD16A	#N/A	#N/A	#N/A		#N/A	#N/A	#N/A
ABHD2	#N/A	#N/A	#N/A		#N/A	Abhd2	Abhd2
ABHD3	#N/A	#N/A	#N/A		Abhd3	Abhd3	Abhd3
ABHD6	#N/A	#N/A	#N/A		#N/A	#N/A	#N/A
ABO	#N/A	#N/A	#N/A		Abo	Abo	Abo
AC001226.2	#N/A	#N/A	#N/A		#N/A	#N/A	#N/A
AC004691.2	#N/A	#N/A	#N/A		#N/A	#N/A	#N/A
AC004754.1	#N/A	#N/A	#N/A		#N/A	#N/A	#N/A
AC004832.3	#N/A	#N/A	#N/A		#N/A	#N/A	#N/A
AC005551.1	#N/A	#N/A	#N/A		#N/A	#N/A	#N/A
AC006538.2	#N/A	#N/A	#N/A		#N/A	#N/A	#N/A
AC007040.2	#N/A	#N/A	#N/A		#N/A	#N/A	#N/A
AC008397.1	#N/A	#N/A	#N/A		#N/A	#N/A	#N/A
AC009163.4	#N/A	#N/A	#N/A		#N/A	#N/A	#N/A
AC009477.2	#N/A	#N/A	#N/A		#N/A	#N/A	#N/A
AC010319.2	#N/A	#N/A	#N/A		#N/A	#N/A	#N/A
AC010325.1	#N/A	#N/A	#N/A		#N/A	#N/A	#N/A
AC011448.1	#N/A	#N/A	#N/A		#N/A	#N/A	#N/A
AC011604.2	#N/A	#N/A	#N/A		#N/A	#N/A	#N/A
AC018709.1	#N/A	#N/A	#N/A		#N/A	#N/A	#N/A
AC018755.2	#N/A	#N/A	#N/A		#N/A	#N/A	#N/A
AC022167.5	#N/A	#N/A	#N/A		#N/A	#N/A	#N/A
AC024592.3	#N/A	#N/A	#N/A		#N/A	#N/A	#N/A
AC026316.5	#N/A	#N/A	#N/A		#N/A	#N/A	#N/A
AC068580.4	#N/A	#N/A	#N/A		#N/A	#N/A	#N/A
AC068775.1	#N/A	#N/A	#N/A		#N/A	#N/A	#N/A
AC068987.5	#N/A	#N/A	#N/A		#N/A	#N/A	#N/A
AC078864.2	#N/A	#N/A	#N/A		#N/A	#N/A	#N/A
AC087498.1	#N/A	#N/A	#N/A		#N/A	#N/A	#N/A
AC092143.1	#N/A	#N/A	#N/A		#N/A	#N/A	#N/A
AC092718.3	#N/A	#N/A	#N/A		#N/A	#N/A	#N/A
AC093525.2	#N/A	#N/A	#N/A		#N/A	#N/A	#N/A
AC097637.1	#N/A	#N/A	#N/A		#N/A	#N/A	#N/A
AC100868.1	#N/A	#N/A	#N/A		#N/A	#N/A	#N/A
AC116565.1	#N/A	#N/A	#N/A		#N/A	#N/A	#N/A
AC117457.1	#N/A	#N/A	#N/A		#N/A	#N/A	#N/A
AC118553.2	#N/A	#N/A	#N/A		#N/A	#N/A	#N/A
AC119396.1	#N/A	#N/A	#N/A		#N/A	#N/A	#N/A
AC126755.2	#N/A	#N/A	#N/A		#N/A	#N/A	#N/A
AC129492.3	#N/A	#N/A	#N/A		#N/A	#N/A	#N/A
AC131160.1	#N/A	#N/A	#N/A		#N/A	#N/A	#N/A
AC134669.1	#N/A	#N/A	#N/A		#N/A	#N/A	#N/A
AC134980.5	#N/A	#N/A	#N/A		#N/A	#N/A	#N/A
AC135068.1	#N/A	#N/A	#N/A		#N/A	#N/A	#N/A
AC135068.3	#N/A	#N/A	#N/A		#N/A	#N/A	#N/A
AC136616.1	#N/A	#N/A	#N/A		#N/A	#N/A	#N/A
AC138811.2	#N/A	#N/A	#N/A		#N/A	#N/A	#N/A
AC138894.1	#N/A	#N/A	#N/A		#N/A	#N/A	#N/A
AC138969.1	#N/A	#N/A	#N/A		#N/A	#N/A	#N/A
AC171558.1	#N/A	#N/A	#N/A		#N/A	#N/A	#N/A
AC171558.3	#N/A	#N/A	#N/A		#N/A	#N/A	#N/A
AC213203.1	#N/A	#N/A	#N/A		#N/A	#N/A	#N/A
ACBD4	#N/A	#N/A	#N/A		#N/A	#N/A	#N/A
ACBD5	#N/A	#N/A	#N/A		#N/A	#N/A	#N/A
ACE	#N/A	#N/A	#N/A		#N/A	#N/A	Ace
ACE2	#N/A	#N/A	#N/A		#N/A	#N/A	#N/A
ACER1	#N/A	#N/A	#N/A		#N/A	#N/A	#N/A
ACER2	#N/A	#N/A	#N/A		#N/A	#N/A	#N/A
ACER3	Acer3	Acer3	Acer3		#N/A	#N/A	#N/A
ACHE	#N/A	#N/A	#N/A		#N/A	#N/A	#N/A
ACKR1	#N/A	#N/A	#N/A		#N/A	#N/A	#N/A
ACKR2	#N/A	#N/A	#N/A		#N/A	#N/A	#N/A
ACKR3	#N/A	#N/A	#N/A		#N/A	#N/A	#N/A
ACKR4	#N/A	#N/A	#N/A		#N/A	#N/A	#N/A
ACP2	#N/A	#N/A	#N/A		#N/A	#N/A	#N/A
ACP4	#N/A	#N/A	#N/A		#N/A	#N/A	#N/A
ACPP	#N/A	#N/A	#N/A		#N/A	#N/A	#N/A
ACSBG2	#N/A	#N/A	#N/A		#N/A	#N/A	#N/A
ACSF2	#N/A	#N/A	#N/A		#N/A	#N/A	#N/A
ACSF3	#N/A	#N/A	#N/A		#N/A	#N/A	#N/A
ACSL1	#N/A	#N/A	#N/A		#N/A	Acsl1	Acsl1
ACSL3	#N/A	#N/A	#N/A		#N/A	#N/A	#N/A
ACSL4	#N/A	#N/A	#N/A		Acsl4	Acsl4	Acsl4
ACSL5	#N/A	#N/A	#N/A		#N/A	#N/A	#N/A
ACSL6	#N/A	#N/A	#N/A		#N/A	#N/A	#N/A
ACSM1	#N/A	#N/A	#N/A		#N/A	#N/A	#N/A
ACSM2A	#N/A	#N/A	#N/A		#N/A	#N/A	#N/A
ACSM2B	#N/A	#N/A	#N/A		#N/A	#N/A	#N/A
ACSM4	#N/A	#N/A	#N/A		#N/A	#N/A	#N/A
ACSM6	#N/A	#N/A	#N/A		#N/A	#N/A	#N/A
ACSS1	#N/A	#N/A	#N/A		#N/A	#N/A	#N/A
ACSS2	#N/A	#N/A	#N/A		#N/A	#N/A	#N/A
ACSS3	#N/A	#N/A	#N/A		#N/A	#N/A	#N/A
ACVR1	#N/A	#N/A	#N/A		#N/A	#N/A	#N/A
ACVR1B	#N/A	#N/A	#N/A		#N/A	#N/A	#N/A
ACVR1C	#N/A	#N/A	#N/A		Acvr1c	Acvr1c	Acvr1c
ACVR2A	#N/A	#N/A	#N/A		#N/A	#N/A	#N/A
ACVR2B	#N/A	#N/A	#N/A		#N/A	#N/A	#N/A
ACVRL1	#N/A	#N/A	#N/A		#N/A	#N/A	#N/A
ADAM10	Adam10	#N/A	#N/A		#N/A	#N/A	#N/A
ADAM11	#N/A	#N/A	#N/A		Adam11	Adam11	#N/A
ADAM12	#N/A	Adam12	Adam12		#N/A	#N/A	#N/A
ADAM15	#N/A	#N/A	#N/A		#N/A	#N/A	#N/A
ADAM17	#N/A	#N/A	#N/A		#N/A	#N/A	#N/A
ADAM18	#N/A	#N/A	#N/A		#N/A	#N/A	#N/A
ADAM19	#N/A	#N/A	#N/A		#N/A	#N/A	#N/A
ADAM2	#N/A	#N/A	#N/A		#N/A	#N/A	#N/A
ADAM20	#N/A	#N/A	#N/A		#N/A	#N/A	#N/A
ADAM21	#N/A	#N/A	#N/A		#N/A	#N/A	#N/A
ADAM22	#N/A	#N/A	#N/A		Adam22	#N/A	#N/A
ADAM23	#N/A	#N/A	#N/A		#N/A	#N/A	#N/A
ADAM28	#N/A	#N/A	#N/A		#N/A	Adam28	Adam28
ADAM29	#N/A	#N/A	#N/A		#N/A	#N/A	#N/A
ADAM30	#N/A	#N/A	#N/A		#N/A	#N/A	#N/A
ADAM32	#N/A	#N/A	#N/A		#N/A	#N/A	#N/A
ADAM33	#N/A	#N/A	#N/A		Adam33	#N/A	#N/A
ADAM7	#N/A	#N/A	#N/A		#N/A	#N/A	#N/A
ADAM8	Adam8	Adam8	Adam8		#N/A	#N/A	#N/A
ADAM9	#N/A	#N/A	#N/A		#N/A	#N/A	#N/A
ADAMTS1	#N/A	#N/A	#N/A		#N/A	#N/A	#N/A
ADAMTS4	#N/A	Adamts4	Adamts4		#N/A	#N/A	#N/A
ADCK2	#N/A	#N/A	#N/A		#N/A	#N/A	#N/A
ADCK5	#N/A	#N/A	#N/A		#N/A	#N/A	#N/A
ADCY1	#N/A	#N/A	#N/A		Adcy1	Adcy1	Adcy1
ADCY10	#N/A	#N/A	#N/A		#N/A	#N/A	#N/A
ADCY2	#N/A	#N/A	#N/A		#N/A	#N/A	#N/A
ADCY3	#N/A	#N/A	#N/A		#N/A	#N/A	#N/A
ADCY4	#N/A	#N/A	#N/A		#N/A	#N/A	#N/A
ADCY5	#N/A	#N/A	#N/A		Adcy5	Adcy5	Adcy5
ADCY6	#N/A	#N/A	#N/A		#N/A	#N/A	#N/A
ADCY7	#N/A	#N/A	#N/A		#N/A	#N/A	#N/A
ADCY8	Adcy8	Adcy8	Adcy8		#N/A	#N/A	#N/A
ADCY9	#N/A	#N/A	#N/A		#N/A	#N/A	Adcy9
ADCYAP1R1	#N/A	#N/A	#N/A		#N/A	#N/A	#N/A
ADGRA1	#N/A	#N/A	#N/A		#N/A	#N/A	#N/A
ADGRA2	#N/A	#N/A	#N/A		#N/A	#N/A	#N/A
ADGRA3	#N/A	#N/A	#N/A		#N/A	#N/A	#N/A
ADGRB1	#N/A	#N/A	#N/A		#N/A	#N/A	#N/A
ADGRB2	#N/A	#N/A	#N/A		#N/A	#N/A	#N/A
ADGRB3	#N/A	#N/A	#N/A		#N/A	#N/A	#N/A
ADGRD1	#N/A	#N/A	#N/A		#N/A	#N/A	#N/A
ADGRD2	#N/A	#N/A	#N/A		#N/A	#N/A	#N/A
ADGRE1	#N/A	#N/A	#N/A		#N/A	#N/A	#N/A
ADGRE2	#N/A	#N/A	#N/A		#N/A	#N/A	#N/A
ADGRE3	#N/A	#N/A	#N/A		#N/A	#N/A	#N/A
ADGRE5	#N/A	#N/A	#N/A		#N/A	#N/A	#N/A
ADGRF1	#N/A	#N/A	#N/A		#N/A	#N/A	#N/A
ADGRF2	#N/A	#N/A	#N/A		#N/A	#N/A	#N/A
ADGRF3	#N/A	#N/A	#N/A		#N/A	#N/A	#N/A
ADGRF4	#N/A	#N/A	#N/A		#N/A	#N/A	#N/A
ADGRF5	#N/A	#N/A	#N/A		#N/A	#N/A	#N/A
ADGRG1	#N/A	#N/A	#N/A		#N/A	#N/A	#N/A
ADGRG2	#N/A	#N/A	#N/A		#N/A	#N/A	#N/A
ADGRG3	#N/A	#N/A	#N/A		#N/A	#N/A	#N/A
ADGRG4	#N/A	#N/A	#N/A		#N/A	#N/A	#N/A
ADGRG5	#N/A	#N/A	#N/A		#N/A	#N/A	#N/A
ADGRG6	#N/A	#N/A	#N/A		#N/A	#N/A	#N/A
ADGRG7	#N/A	#N/A	#N/A		#N/A	#N/A	#N/A
ADGRL1	#N/A	#N/A	#N/A		#N/A	#N/A	#N/A
ADGRL2	#N/A	#N/A	#N/A		#N/A	#N/A	#N/A
ADGRL3	#N/A	#N/A	#N/A		#N/A	#N/A	#N/A
ADGRL4	#N/A	#N/A	#N/A		#N/A	#N/A	#N/A
ADGRV1	#N/A	#N/A	#N/A		#N/A	#N/A	#N/A
ADIG	#N/A	#N/A	#N/A		#N/A	#N/A	#N/A
ADIPOR1	#N/A	#N/A	#N/A		#N/A	#N/A	#N/A
ADIPOR2	#N/A	#N/A	#N/A		#N/A	#N/A	#N/A
ADORA1	#N/A	#N/A	#N/A		#N/A	#N/A	#N/A
ADORA2A	#N/A	#N/A	#N/A		#N/A	#N/A	#N/A
ADORA2B	Adora2b	Adora2b	Adora2b		#N/A	#N/A	#N/A
ADORA3	#N/A	#N/A	#N/A		#N/A	#N/A	#N/A
ADPRM	#N/A	#N/A	#N/A		#N/A	#N/A	#N/A
ADRA1A	#N/A	#N/A	#N/A		Adra1a	Adra1a	Adra1a
ADRA1B	#N/A	#N/A	#N/A		#N/A	#N/A	#N/A
ADRA1D	#N/A	#N/A	#N/A		#N/A	#N/A	#N/A
ADRA2A	Adra2a	Adra2a	#N/A		#N/A	#N/A	#N/A
ADRA2B	#N/A	#N/A	#N/A		#N/A	#N/A	#N/A
ADRA2C	#N/A	#N/A	#N/A		#N/A	#N/A	#N/A
ADRB1	Adrb1	Adrb1	Adrb1		#N/A	#N/A	#N/A
ADRB2	#N/A	#N/A	#N/A		#N/A	Adrb2	Adrb2
ADRB3	#N/A	#N/A	#N/A		#N/A	#N/A	Adrb3
ADTRP	#N/A	#N/A	#N/A		#N/A	#N/A	#N/A
AF241726.2	#N/A	#N/A	#N/A		#N/A	#N/A	#N/A
AFG3L2	#N/A	#N/A	#N/A		#N/A	#N/A	#N/A
AGER	#N/A	#N/A	Ager		#N/A	#N/A	#N/A
AGL	#N/A	#N/A	#N/A		#N/A	#N/A	#N/A
AGMO	#N/A	#N/A	#N/A		#N/A	#N/A	#N/A
AGPAT1	#N/A	#N/A	#N/A		#N/A	#N/A	#N/A
AGPAT2	#N/A	#N/A	#N/A		#N/A	#N/A	#N/A
AGPAT3	#N/A	#N/A	#N/A		#N/A	#N/A	Agpat3
AGPAT4	#N/A	#N/A	#N/A		#N/A	#N/A	#N/A
AGPAT5	#N/A	#N/A	#N/A		#N/A	#N/A	#N/A
AGRN	#N/A	#N/A	#N/A		#N/A	#N/A	#N/A
AGTR1	#N/A	#N/A	#N/A		#N/A	#N/A	#N/A
AGTR2	#N/A	#N/A	#N/A		#N/A	#N/A	#N/A
AGTRAP	#N/A	#N/A	#N/A		#N/A	#N/A	#N/A
AIFM1	#N/A	#N/A	#N/A		#N/A	#N/A	#N/A
AIG1	#N/A	#N/A	#N/A		#N/A	#N/A	#N/A
AJAP1	#N/A	#N/A	#N/A		Ajap1	Ajap1	#N/A
AKAP1	#N/A	#N/A	#N/A		#N/A	#N/A	#N/A
AKAP6	#N/A	#N/A	#N/A		#N/A	#N/A	#N/A
AKAP9	#N/A	#N/A	#N/A		#N/A	#N/A	#N/A
AL034430.1	#N/A	#N/A	#N/A		#N/A	#N/A	#N/A
AL035460.1	#N/A	#N/A	#N/A		#N/A	#N/A	#N/A
AL121845.3	#N/A	#N/A	#N/A		#N/A	#N/A	#N/A
AL121900.2	#N/A	#N/A	#N/A		#N/A	#N/A	#N/A
AL136295.1	#N/A	#N/A	#N/A		#N/A	#N/A	#N/A
AL136295.3	#N/A	#N/A	#N/A		#N/A	#N/A	#N/A
AL136373.1	#N/A	#N/A	#N/A		#N/A	#N/A	#N/A
AL391650.1	#N/A	#N/A	#N/A		#N/A	#N/A	#N/A
AL590132.1	#N/A	#N/A	#N/A		#N/A	#N/A	#N/A
AL592490.1	#N/A	#N/A	#N/A		#N/A	#N/A	#N/A
AL662820.1	#N/A	#N/A	#N/A		#N/A	#N/A	#N/A
AL669918.1	#N/A	#N/A	#N/A		#N/A	#N/A	#N/A
AL691442.1	#N/A	#N/A	#N/A		#N/A	#N/A	#N/A
AL845331.2	#N/A	#N/A	#N/A		#N/A	#N/A	#N/A
ALCAM	#N/A	#N/A	#N/A		#N/A	#N/A	#N/A
ALDH16A1	#N/A	#N/A	#N/A		#N/A	#N/A	#N/A
ALDH3A2	#N/A	#N/A	#N/A		Aldh3a2	Aldh3a2	Aldh3a2
ALDH3B2	#N/A	#N/A	#N/A		#N/A	#N/A	#N/A
ALDH6A1	#N/A	#N/A	#N/A		Aldh6a1	Aldh6a1	Aldh6a1
ALDOA	Aldoa	#N/A	#N/A		#N/A	#N/A	#N/A
ALG1	#N/A	#N/A	#N/A		#N/A	#N/A	#N/A
ALG10	#N/A	#N/A	#N/A		#N/A	#N/A	#N/A
ALG10B	#N/A	#N/A	#N/A		#N/A	#N/A	#N/A
ALG11	#N/A	#N/A	#N/A		#N/A	#N/A	#N/A
ALG12	#N/A	#N/A	#N/A		#N/A	#N/A	#N/A
ALG14	#N/A	#N/A	Alg14		#N/A	#N/A	#N/A
ALG2	#N/A	#N/A	#N/A		#N/A	#N/A	#N/A
ALG3	#N/A	#N/A	#N/A		#N/A	#N/A	#N/A
ALG5	#N/A	#N/A	#N/A		#N/A	#N/A	#N/A
ALG6	#N/A	#N/A	#N/A		#N/A	#N/A	#N/A
ALG8	#N/A	#N/A	#N/A		#N/A	#N/A	#N/A
ALG9	#N/A	#N/A	#N/A		#N/A	#N/A	#N/A
ALK	#N/A	#N/A	#N/A		Alk	#N/A	#N/A
ALOX5AP	#N/A	#N/A	#N/A		#N/A	#N/A	#N/A
ALPK1	Alpk1	Alpk1	Alpk1		#N/A	#N/A	#N/A
ALPL	#N/A	#N/A	#N/A		#N/A	#N/A	#N/A
AMFR	#N/A	#N/A	#N/A		#N/A	#N/A	#N/A
AMHR2	#N/A	#N/A	#N/A		#N/A	#N/A	#N/A
AMIGO1	#N/A	#N/A	#N/A		#N/A	Amigo1	Amigo1
AMIGO2	#N/A	#N/A	#N/A		#N/A	Amigo2	#N/A
AMIGO3	#N/A	#N/A	#N/A		#N/A	#N/A	#N/A
AMN	#N/A	Amn	Amn		#N/A	#N/A	#N/A
ANAPC1	#N/A	#N/A	#N/A		#N/A	#N/A	#N/A
ANKH	#N/A	#N/A	#N/A		#N/A	#N/A	#N/A
ANKLE1	Ankle1	Ankle1	Ankle1		#N/A	#N/A	#N/A
ANKLE2	#N/A	#N/A	#N/A		#N/A	#N/A	#N/A
ANKRD29	#N/A	#N/A	#N/A		#N/A	#N/A	#N/A
ANKRD46	#N/A	#N/A	#N/A		#N/A	#N/A	#N/A
ANO1	#N/A	#N/A	#N/A		#N/A	#N/A	#N/A
ANO10	#N/A	#N/A	#N/A		#N/A	#N/A	#N/A
ANO2	#N/A	#N/A	#N/A		#N/A	#N/A	#N/A
ANO3	#N/A	#N/A	#N/A		#N/A	#N/A	#N/A
ANO4	#N/A	#N/A	#N/A		#N/A	#N/A	#N/A
ANO5	#N/A	#N/A	#N/A		#N/A	#N/A	#N/A
ANO6	#N/A	#N/A	#N/A		#N/A	#N/A	#N/A
ANO7	#N/A	#N/A	#N/A		#N/A	#N/A	#N/A
ANO8	#N/A	#N/A	#N/A		#N/A	#N/A	#N/A
ANO9	#N/A	#N/A	#N/A		#N/A	#N/A	#N/A
ANPEP	Anpep	Anpep	Anpep		#N/A	#N/A	#N/A
ANTXR1	#N/A	#N/A	#N/A		#N/A	#N/A	#N/A
ANTXR2	#N/A	#N/A	#N/A		#N/A	#N/A	#N/A
ANTXRL	#N/A	#N/A	#N/A		#N/A	#N/A	#N/A
AP000350.4	#N/A	#N/A	#N/A		#N/A	#N/A	#N/A
AP000781.2	#N/A	#N/A	#N/A		#N/A	#N/A	#N/A
AP001781.2	#N/A	#N/A	#N/A		#N/A	#N/A	#N/A
AP002512.3	#N/A	#N/A	#N/A		#N/A	#N/A	#N/A
AP003071.5	#N/A	#N/A	#N/A		#N/A	#N/A	#N/A
AP006437.1	#N/A	#N/A	#N/A		#N/A	#N/A	#N/A
AP5S1	#N/A	#N/A	#N/A		#N/A	#N/A	#N/A
APCDD1	#N/A	#N/A	#N/A		Apcdd1	Apcdd1	#N/A
APCDD1L	#N/A	#N/A	#N/A		#N/A	#N/A	#N/A
APH1A	#N/A	#N/A	#N/A		#N/A	#N/A	#N/A
APH1B	#N/A	#N/A	#N/A		#N/A	#N/A	#N/A
APLF	#N/A	#N/A	#N/A		#N/A	#N/A	#N/A
APLNR	#N/A	#N/A	#N/A		#N/A	#N/A	#N/A
APLP1	#N/A	Aplp1	Aplp1		#N/A	#N/A	#N/A
APLP2	#N/A	#N/A	#N/A		#N/A	#N/A	#N/A
APMAP	#N/A	#N/A	#N/A		#N/A	#N/A	#N/A
APOC4-APOC2	#N/A	#N/A	#N/A		#N/A	#N/A	#N/A
APOL1	#N/A	#N/A	#N/A		#N/A	#N/A	#N/A
APOL2	#N/A	#N/A	#N/A		#N/A	#N/A	#N/A
APOL4	#N/A	#N/A	#N/A		#N/A	#N/A	#N/A
APOL6	#N/A	#N/A	#N/A		#N/A	#N/A	#N/A
APOLD1	#N/A	#N/A	#N/A		#N/A	#N/A	#N/A
APOO	#N/A	#N/A	#N/A		#N/A	#N/A	#N/A
APP	#N/A	#N/A	#N/A		#N/A	#N/A	#N/A
AQP1	#N/A	#N/A	#N/A		#N/A	#N/A	#N/A
AQP10	#N/A	#N/A	#N/A		#N/A	#N/A	#N/A
AQP11	#N/A	#N/A	#N/A		#N/A	#N/A	#N/A
AQP12A	#N/A	#N/A	#N/A		#N/A	#N/A	#N/A
AQP12B	#N/A	#N/A	#N/A		#N/A	#N/A	#N/A
AQP2	#N/A	#N/A	#N/A		#N/A	#N/A	#N/A
AQP3	#N/A	#N/A	#N/A		#N/A	#N/A	#N/A
AQP4	#N/A	#N/A	#N/A		#N/A	#N/A	#N/A
AQP5	#N/A	#N/A	#N/A		#N/A	Aqp5	Aqp5
AQP6	#N/A	#N/A	#N/A		#N/A	#N/A	#N/A
AQP7	#N/A	#N/A	#N/A		#N/A	#N/A	#N/A
AQP8	#N/A	#N/A	#N/A		Aqp8	#N/A	Aqp8
AQP9	#N/A	#N/A	#N/A		#N/A	#N/A	#N/A
AQR	#N/A	#N/A	#N/A		#N/A	#N/A	#N/A
AREG	Areg	Areg	Areg		#N/A	#N/A	#N/A
AREL1	#N/A	#N/A	#N/A		#N/A	#N/A	#N/A
ARHGAP1	#N/A	#N/A	#N/A		#N/A	#N/A	#N/A
ARHGAP26	#N/A	#N/A	#N/A		#N/A	#N/A	#N/A
ARHGAP42	#N/A	#N/A	#N/A		#N/A	#N/A	#N/A
ARIH2OS	#N/A	#N/A	#N/A		#N/A	#N/A	#N/A
ARL10	#N/A	#N/A	#N/A		#N/A	#N/A	#N/A
ARL6IP1	#N/A	#N/A	#N/A		#N/A	#N/A	#N/A
ARL6IP5	#N/A	#N/A	#N/A		#N/A	#N/A	#N/A
ARL6IP6	#N/A	#N/A	#N/A		#N/A	#N/A	#N/A
ARMC10	#N/A	#N/A	#N/A		#N/A	#N/A	#N/A
ARMCX1	#N/A	#N/A	#N/A		#N/A	#N/A	#N/A
ARMCX2	#N/A	#N/A	#N/A		#N/A	#N/A	#N/A
ARMCX3	#N/A	#N/A	#N/A		#N/A	#N/A	#N/A
ARMCX6	#N/A	#N/A	#N/A		#N/A	#N/A	#N/A
ARSD	#N/A	#N/A	#N/A		#N/A	#N/A	#N/A
ARSE	#N/A	#N/A	#N/A		#N/A	#N/A	#N/A
ARSF	#N/A	#N/A	#N/A		#N/A	#N/A	#N/A
ARSH	#N/A	#N/A	#N/A		#N/A	#N/A	#N/A
ART1	#N/A	#N/A	#N/A		#N/A	#N/A	#N/A
ART3	#N/A	#N/A	#N/A		Art3	#N/A	#N/A
ART4	#N/A	#N/A	#N/A		#N/A	Art4	Art4
ARV1	#N/A	#N/A	#N/A		#N/A	#N/A	#N/A
ASB11	#N/A	#N/A	#N/A		#N/A	#N/A	#N/A
ASB18	#N/A	#N/A	#N/A		#N/A	#N/A	#N/A
ASB5	#N/A	#N/A	#N/A		#N/A	#N/A	#N/A
ASGR2	#N/A	#N/A	#N/A		#N/A	#N/A	#N/A
ASIC1	#N/A	#N/A	#N/A		#N/A	#N/A	#N/A
ASIC2	#N/A	#N/A	#N/A		Asic2	#N/A	#N/A
ASIC3	#N/A	#N/A	#N/A		#N/A	#N/A	#N/A
ASIC4	#N/A	#N/A	#N/A		Asic4	Asic4	Asic4
ASIC5	#N/A	#N/A	#N/A		#N/A	#N/A	#N/A
ASPH	#N/A	#N/A	#N/A		#N/A	#N/A	#N/A
ASPHD1	#N/A	#N/A	#N/A		#N/A	#N/A	#N/A
ASPHD2	#N/A	#N/A	#N/A		#N/A	#N/A	#N/A
ASPRV1	#N/A	#N/A	#N/A		#N/A	#N/A	#N/A
ASTN1	#N/A	#N/A	#N/A		#N/A	#N/A	#N/A
ASTN2	#N/A	#N/A	#N/A		#N/A	#N/A	#N/A
ASZ1	#N/A	#N/A	#N/A		#N/A	#N/A	#N/A
ATAD1	#N/A	#N/A	#N/A		#N/A	#N/A	#N/A
ATF6	#N/A	#N/A	#N/A		#N/A	#N/A	#N/A
ATF6B	#N/A	#N/A	#N/A		#N/A	#N/A	#N/A
ATF7	#N/A	#N/A	#N/A		#N/A	#N/A	#N/A
ATG9A	#N/A	#N/A	#N/A		#N/A	#N/A	#N/A
ATG9B	#N/A	#N/A	Atg9b		#N/A	#N/A	#N/A
ATL1	#N/A	#N/A	#N/A		#N/A	#N/A	#N/A
ATL2	#N/A	#N/A	#N/A		#N/A	#N/A	#N/A
ATL3	#N/A	#N/A	#N/A		#N/A	#N/A	#N/A
ATM	#N/A	#N/A	#N/A		#N/A	#N/A	#N/A
ATP10A	#N/A	#N/A	#N/A		#N/A	#N/A	#N/A
ATP10B	Atp10b	Atp10b	Atp10b		#N/A	#N/A	#N/A
ATP10D	#N/A	#N/A	#N/A		#N/A	#N/A	#N/A
ATP11A	#N/A	#N/A	#N/A		#N/A	#N/A	#N/A
ATP11B	#N/A	#N/A	#N/A		#N/A	#N/A	#N/A
ATP11C	#N/A	#N/A	#N/A		#N/A	#N/A	#N/A
ATP12A	#N/A	#N/A	#N/A		Atp12a	Atp12a	Atp12a
ATP13A1	#N/A	#N/A	#N/A		#N/A	#N/A	#N/A
ATP13A2	#N/A	#N/A	#N/A		#N/A	#N/A	#N/A
ATP13A3	#N/A	#N/A	#N/A		#N/A	#N/A	#N/A
ATP13A4	#N/A	#N/A	#N/A		Atp13a4	Atp13a4	Atp13a4
ATP13A5	#N/A	#N/A	#N/A		#N/A	#N/A	#N/A
ATP1A1	#N/A	#N/A	#N/A		#N/A	#N/A	#N/A
ATP1A2	#N/A	#N/A	#N/A		#N/A	#N/A	#N/A
ATP1A3	#N/A	#N/A	#N/A		#N/A	#N/A	#N/A
ATP1A4	#N/A	#N/A	#N/A		#N/A	#N/A	#N/A
ATP1B1	#N/A	#N/A	#N/A		#N/A	#N/A	#N/A
ATP1B2	#N/A	#N/A	#N/A		#N/A	#N/A	#N/A
ATP1B3	#N/A	#N/A	#N/A		#N/A	#N/A	#N/A
ATP1B4	#N/A	#N/A	#N/A		#N/A	#N/A	#N/A
ATP2A1	#N/A	#N/A	#N/A		#N/A	#N/A	#N/A
ATP2A2	#N/A	#N/A	#N/A		#N/A	#N/A	#N/A
ATP2A3	Atp2a3	Atp2a3	Atp2a3		#N/A	#N/A	#N/A
ATP2B1	#N/A	#N/A	#N/A		#N/A	#N/A	#N/A
ATP2B2	#N/A	#N/A	#N/A		#N/A	#N/A	#N/A
ATP2B3	#N/A	#N/A	#N/A		Atp2b3	Atp2b3	Atp2b3
ATP2B4	#N/A	#N/A	#N/A		Atp2b4	#N/A	#N/A
ATP2C1	#N/A	#N/A	#N/A		#N/A	#N/A	#N/A
ATP2C2	#N/A	#N/A	#N/A		#N/A	#N/A	Atp2c2
ATP4A	Atp4a	#N/A	#N/A		#N/A	#N/A	#N/A
ATP4B	#N/A	#N/A	#N/A		#N/A	#N/A	#N/A
ATP5MC1	#N/A	#N/A	#N/A		#N/A	#N/A	#N/A
ATP5MC2	#N/A	#N/A	#N/A		#N/A	#N/A	#N/A
ATP5MC3	#N/A	#N/A	#N/A		#N/A	#N/A	#N/A
ATP5MD	#N/A	#N/A	#N/A		#N/A	#N/A	#N/A
ATP5MF	#N/A	#N/A	#N/A		#N/A	#N/A	#N/A
ATP5MG	#N/A	#N/A	#N/A		#N/A	#N/A	#N/A
ATP5MPL	#N/A	#N/A	#N/A		#N/A	#N/A	#N/A
ATP5PB	#N/A	#N/A	#N/A		#N/A	#N/A	#N/A
ATP6AP1	#N/A	#N/A	#N/A		#N/A	#N/A	#N/A
ATP6AP1L	#N/A	#N/A	#N/A		#N/A	#N/A	#N/A
ATP6AP2	#N/A	#N/A	#N/A		#N/A	#N/A	#N/A
ATP6V0A1	#N/A	#N/A	#N/A		#N/A	#N/A	#N/A
ATP6V0A2	#N/A	#N/A	#N/A		#N/A	#N/A	#N/A
ATP6V0A4	#N/A	Atp6v0a4	#N/A		#N/A	#N/A	#N/A
ATP6V0B	#N/A	#N/A	#N/A		#N/A	#N/A	#N/A
ATP6V0C	#N/A	#N/A	#N/A		#N/A	#N/A	#N/A
ATP6V0E1	#N/A	#N/A	#N/A		#N/A	#N/A	#N/A
ATP6V0E2	#N/A	#N/A	#N/A		#N/A	#N/A	Atp6v0e2
ATP7A	#N/A	#N/A	#N/A		#N/A	#N/A	#N/A
ATP7B	#N/A	#N/A	#N/A		#N/A	#N/A	#N/A
ATP8A1	#N/A	#N/A	#N/A		#N/A	#N/A	#N/A
ATP8A2	#N/A	Atp8a2	Atp8a2		#N/A	#N/A	#N/A
ATP8B1	#N/A	#N/A	#N/A		#N/A	#N/A	#N/A
ATP8B2	#N/A	#N/A	#N/A		#N/A	#N/A	#N/A
ATP8B3	#N/A	#N/A	#N/A		#N/A	#N/A	#N/A
ATP8B4	#N/A	#N/A	Atp8b4		#N/A	#N/A	#N/A
ATP9A	#N/A	#N/A	#N/A		#N/A	#N/A	#N/A
ATP9B	#N/A	#N/A	#N/A		#N/A	#N/A	#N/A
ATR	#N/A	#N/A	#N/A		#N/A	#N/A	#N/A
ATRAID	#N/A	#N/A	#N/A		#N/A	#N/A	#N/A
ATRN	#N/A	#N/A	#N/A		#N/A	#N/A	#N/A
ATRNL1	#N/A	#N/A	#N/A		#N/A	#N/A	#N/A
ATXN3	#N/A	#N/A	#N/A		#N/A	#N/A	#N/A
AUP1	#N/A	#N/A	#N/A		#N/A	#N/A	#N/A
AVL9	#N/A	#N/A	#N/A		#N/A	#N/A	#N/A
AVPR1A	#N/A	#N/A	#N/A		#N/A	#N/A	#N/A
AVPR1B	#N/A	#N/A	#N/A		#N/A	#N/A	#N/A
AVPR2	#N/A	#N/A	#N/A		#N/A	#N/A	#N/A
AWAT1	#N/A	#N/A	#N/A		#N/A	#N/A	#N/A
AWAT2	#N/A	#N/A	#N/A		#N/A	#N/A	#N/A
AXL	#N/A	#N/A	#N/A		#N/A	#N/A	#N/A
B3GALT2	B3galt2	B3galt2	#N/A		#N/A	#N/A	#N/A
B3GAT2	#N/A	#N/A	#N/A		#N/A	#N/A	#N/A
B3GNT10	#N/A	#N/A	#N/A		#N/A	#N/A	#N/A
B3GNT2	#N/A	#N/A	#N/A		#N/A	#N/A	#N/A
B4GALNT2	B4galnt2	#N/A	#N/A		#N/A	#N/A	#N/A
B4GALT1	#N/A	B4galt1	B4galt1		#N/A	#N/A	#N/A
B4GALT2	#N/A	#N/A	#N/A		#N/A	#N/A	#N/A
BACE1	#N/A	#N/A	#N/A		#N/A	#N/A	#N/A
BACE2	Bace2	Bace2	#N/A		#N/A	#N/A	#N/A
BAK1	Bak1	Bak1	Bak1		#N/A	#N/A	#N/A
BAMBI	#N/A	#N/A	#N/A		#N/A	#N/A	#N/A
BCAM	#N/A	#N/A	#N/A		#N/A	#N/A	#N/A
BCAP29	#N/A	#N/A	#N/A		#N/A	#N/A	#N/A
BCAP31	#N/A	#N/A	#N/A		#N/A	#N/A	#N/A
BCL2	#N/A	#N/A	#N/A		#N/A	#N/A	#N/A
BCL2L1	#N/A	#N/A	#N/A		#N/A	#N/A	#N/A
BCL2L10	#N/A	#N/A	#N/A		#N/A	#N/A	#N/A
BCL2L13	#N/A	#N/A	#N/A		#N/A	#N/A	#N/A
BCL2L2	#N/A	#N/A	#N/A		#N/A	#N/A	#N/A
BCS1L	#N/A	#N/A	#N/A		#N/A	#N/A	#N/A
BDKRB1	#N/A	#N/A	#N/A		#N/A	#N/A	#N/A
BDKRB2	#N/A	#N/A	#N/A		#N/A	#N/A	#N/A
BDNF	#N/A	Bdnf	Bdnf		#N/A	#N/A	#N/A
BEAN1	#N/A	#N/A	#N/A		#N/A	#N/A	#N/A
BEST1	#N/A	#N/A	#N/A		#N/A	#N/A	#N/A
BEST2	Best2	#N/A	#N/A		#N/A	#N/A	#N/A
BEST3	#N/A	#N/A	#N/A		#N/A	#N/A	#N/A
BEST4	#N/A	#N/A	#N/A		#N/A	#N/A	#N/A
BET1	#N/A	#N/A	#N/A		#N/A	#N/A	#N/A
BET1L	#N/A	#N/A	#N/A		#N/A	#N/A	#N/A
BFAR	#N/A	#N/A	#N/A		#N/A	#N/A	#N/A
BIK	#N/A	#N/A	#N/A		#N/A	#N/A	#N/A
BMPR1A	#N/A	#N/A	#N/A		#N/A	#N/A	#N/A
BMPR1B	#N/A	#N/A	#N/A		Bmpr1b	Bmpr1b	Bmpr1b
BMPR2	#N/A	#N/A	#N/A		#N/A	#N/A	#N/A
BMT2	#N/A	#N/A	#N/A		#N/A	#N/A	#N/A
BNIP1	#N/A	#N/A	#N/A		#N/A	#N/A	#N/A
BNIP2	#N/A	#N/A	#N/A		#N/A	#N/A	#N/A
BNIP3	Bnip3	#N/A	#N/A		#N/A	#N/A	#N/A
BNIP3L	#N/A	#N/A	#N/A		#N/A	#N/A	#N/A
BNIPL	#N/A	#N/A	#N/A		#N/A	Bnipl	Bnipl
BOC	#N/A	#N/A	#N/A		#N/A	#N/A	#N/A
BOK	#N/A	Bok	Bok		#N/A	#N/A	#N/A
BRI3	#N/A	#N/A	#N/A		#N/A	#N/A	#N/A
BRI3BP	#N/A	#N/A	#N/A		#N/A	#N/A	#N/A
BRICD5	#N/A	#N/A	#N/A		#N/A	#N/A	#N/A
BRS3	#N/A	#N/A	#N/A		#N/A	#N/A	#N/A
BRSK1	#N/A	#N/A	#N/A		#N/A	#N/A	#N/A
BRSK2	#N/A	#N/A	#N/A		#N/A	#N/A	#N/A
BSCL2	#N/A	#N/A	#N/A		#N/A	#N/A	#N/A
BSG	#N/A	#N/A	#N/A		#N/A	#N/A	#N/A
BSND	#N/A	#N/A	#N/A		Bsnd	Bsnd	Bsnd
BST2	#N/A	Bst2	Bst2		#N/A	#N/A	#N/A
BTC	Btc	Btc	Btc		#N/A	#N/A	#N/A
BTLA	#N/A	#N/A	#N/A		#N/A	#N/A	#N/A
BTN1A1	#N/A	#N/A	#N/A		#N/A	#N/A	#N/A
BTN2A1	#N/A	#N/A	#N/A		#N/A	#N/A	#N/A
BTN2A2	#N/A	#N/A	#N/A		#N/A	#N/A	#N/A
BTN3A1	#N/A	#N/A	#N/A		#N/A	#N/A	#N/A
BTN3A2	#N/A	#N/A	#N/A		#N/A	#N/A	#N/A
BTN3A3	#N/A	#N/A	#N/A		#N/A	#N/A	#N/A
BTNL2	#N/A	#N/A	#N/A		#N/A	#N/A	#N/A
BTNL3	#N/A	#N/A	#N/A		#N/A	#N/A	#N/A
BTNL8	#N/A	#N/A	#N/A		#N/A	#N/A	#N/A
BTNL9	#N/A	#N/A	#N/A		#N/A	#N/A	#N/A
BVES	#N/A	#N/A	#N/A		Bves	#N/A	#N/A
BX255925.3	#N/A	#N/A	#N/A		#N/A	#N/A	#N/A
C10orf128	#N/A	#N/A	#N/A		#N/A	#N/A	#N/A
C11orf24	#N/A	#N/A	#N/A		#N/A	#N/A	#N/A
C11orf87	#N/A	#N/A	#N/A		#N/A	#N/A	#N/A
C12orf76	#N/A	#N/A	#N/A		#N/A	#N/A	#N/A
C14orf132	#N/A	#N/A	#N/A		#N/A	#N/A	#N/A
C14orf180	#N/A	#N/A	#N/A		#N/A	#N/A	#N/A
C14orf37	#N/A	#N/A	#N/A		#N/A	#N/A	#N/A
C16orf54	#N/A	#N/A	#N/A		#N/A	#N/A	#N/A
C16orf58	#N/A	#N/A	#N/A		#N/A	#N/A	#N/A
C16orf91	#N/A	#N/A	#N/A		#N/A	#N/A	#N/A
C16orf92	#N/A	#N/A	#N/A		#N/A	#N/A	#N/A
C17orf113	#N/A	#N/A	#N/A		#N/A	#N/A	#N/A
C17orf62	#N/A	#N/A	#N/A		#N/A	#N/A	#N/A
C17orf78	#N/A	#N/A	#N/A		#N/A	#N/A	#N/A
C17orf80	#N/A	#N/A	#N/A		#N/A	#N/A	#N/A
C18orf32	#N/A	#N/A	#N/A		#N/A	#N/A	#N/A
C19orf18	#N/A	#N/A	#N/A		#N/A	#N/A	#N/A
C19orf24	#N/A	#N/A	#N/A		#N/A	#N/A	#N/A
C19orf38	#N/A	#N/A	#N/A		#N/A	#N/A	#N/A
C1GALT1C1	#N/A	#N/A	#N/A		#N/A	#N/A	#N/A
C1GALT1C1L	#N/A	#N/A	#N/A		#N/A	#N/A	#N/A
C1orf159	#N/A	#N/A	#N/A		#N/A	#N/A	#N/A
C1orf162	#N/A	#N/A	#N/A		#N/A	#N/A	#N/A
C1orf185	#N/A	#N/A	#N/A		#N/A	#N/A	#N/A
C1orf210	#N/A	#N/A	#N/A		#N/A	#N/A	#N/A
C1orf43	#N/A	#N/A	#N/A		#N/A	#N/A	#N/A
C20orf141	#N/A	#N/A	#N/A		#N/A	#N/A	#N/A
C20orf24	#N/A	#N/A	#N/A		#N/A	#N/A	#N/A
C2CD2L	#N/A	#N/A	#N/A		#N/A	#N/A	#N/A
C2orf16	#N/A	#N/A	#N/A		#N/A	#N/A	#N/A
C2orf74	#N/A	#N/A	#N/A		#N/A	#N/A	#N/A
C2orf83	#N/A	#N/A	#N/A		#N/A	#N/A	#N/A
C2orf92	#N/A	#N/A	#N/A		#N/A	#N/A	#N/A
C3AR1	#N/A	#N/A	C3ar1		#N/A	#N/A	#N/A
C3orf18	#N/A	#N/A	#N/A		#N/A	#N/A	#N/A
C3orf52	#N/A	#N/A	#N/A		#N/A	#N/A	#N/A
C3orf80	#N/A	#N/A	#N/A		#N/A	#N/A	#N/A
C4orf3	#N/A	#N/A	#N/A		#N/A	#N/A	#N/A
C5AR1	#N/A	#N/A	C5ar1		#N/A	#N/A	#N/A
C5AR2	#N/A	C5ar2	C5ar2		#N/A	#N/A	#N/A
C5orf15	#N/A	#N/A	#N/A		#N/A	#N/A	#N/A
C5orf42	#N/A	#N/A	#N/A		#N/A	#N/A	#N/A
C5orf60	#N/A	#N/A	#N/A		#N/A	#N/A	#N/A
C6orf10	#N/A	#N/A	#N/A		#N/A	#N/A	#N/A
C6orf136	#N/A	#N/A	#N/A		#N/A	#N/A	#N/A
C6orf47	#N/A	#N/A	#N/A		#N/A	#N/A	#N/A
C6orf89	#N/A	#N/A	#N/A		#N/A	#N/A	#N/A
C9orf57	#N/A	#N/A	#N/A		#N/A	#N/A	#N/A
C9orf84	#N/A	#N/A	#N/A		#N/A	#N/A	#N/A
C9orf92	#N/A	#N/A	#N/A		#N/A	#N/A	#N/A
CA12	#N/A	#N/A	#N/A		#N/A	#N/A	#N/A
CA14	#N/A	#N/A	#N/A		#N/A	#N/A	#N/A
CA4	#N/A	#N/A	#N/A		#N/A	#N/A	#N/A
CA9	#N/A	#N/A	#N/A		#N/A	#N/A	#N/A
CABLES2	#N/A	#N/A	#N/A		#N/A	#N/A	#N/A
CABP7	#N/A	#N/A	#N/A		#N/A	#N/A	#N/A
CACFD1	#N/A	#N/A	#N/A		#N/A	#N/A	#N/A
CACHD1	#N/A	#N/A	#N/A		#N/A	#N/A	#N/A
CACNA1A	#N/A	#N/A	#N/A		#N/A	#N/A	#N/A
CACNA1B	#N/A	#N/A	Cacna1b		#N/A	#N/A	#N/A
CACNA1C	#N/A	#N/A	#N/A		Cacna1c	#N/A	#N/A
CACNA1D	#N/A	#N/A	#N/A		#N/A	#N/A	#N/A
CACNA1E	#N/A	#N/A	#N/A		#N/A	#N/A	#N/A
CACNA1F	#N/A	#N/A	#N/A		#N/A	#N/A	#N/A
CACNA1G	#N/A	#N/A	#N/A		#N/A	#N/A	#N/A
CACNA1H	#N/A	#N/A	#N/A		#N/A	#N/A	#N/A
CACNA1I	#N/A	#N/A	#N/A		Cacna1i	Cacna1i	Cacna1i
CACNA1S	#N/A	#N/A	#N/A		#N/A	#N/A	#N/A
CACNA2D1	#N/A	#N/A	#N/A		Cacna2d1	#N/A	#N/A
CACNA2D3	#N/A	#N/A	#N/A		#N/A	#N/A	#N/A
CACNA2D4	Cacna2d4	Cacna2d4	Cacna2d4		#N/A	#N/A	#N/A
CACNB4	#N/A	#N/A	#N/A		Cacnb4	Cacnb4	Cacnb4
CACNG1	#N/A	#N/A	#N/A		#N/A	#N/A	#N/A
CACNG2	#N/A	#N/A	#N/A		#N/A	#N/A	#N/A
CACNG3	#N/A	#N/A	#N/A		#N/A	#N/A	#N/A
CACNG4	#N/A	#N/A	#N/A		#N/A	#N/A	#N/A
CACNG5	#N/A	#N/A	#N/A		#N/A	#N/A	#N/A
CACNG6	#N/A	#N/A	#N/A		#N/A	#N/A	#N/A
CACNG7	#N/A	#N/A	#N/A		#N/A	#N/A	#N/A
CACNG8	#N/A	#N/A	#N/A		#N/A	#N/A	#N/A
CADM1	Cadm1	#N/A	#N/A		#N/A	#N/A	#N/A
CADM2	#N/A	#N/A	#N/A		#N/A	#N/A	#N/A
CADM3	#N/A	#N/A	#N/A		#N/A	#N/A	#N/A
CADM4	#N/A	#N/A	#N/A		#N/A	#N/A	#N/A
CALCR	#N/A	#N/A	#N/A		#N/A	#N/A	#N/A
CALCRL	#N/A	#N/A	#N/A		#N/A	#N/A	#N/A
CALHM1	#N/A	#N/A	#N/A		#N/A	#N/A	#N/A
CALHM2	#N/A	#N/A	#N/A		#N/A	#N/A	#N/A
CALHM3	#N/A	#N/A	#N/A		#N/A	#N/A	#N/A
CALHM4	#N/A	#N/A	#N/A		#N/A	#N/A	#N/A
CALHM5	#N/A	#N/A	#N/A		#N/A	#N/A	#N/A
CALHM6	#N/A	#N/A	#N/A		#N/A	#N/A	#N/A
CALN1	#N/A	#N/A	#N/A		Caln1	Caln1	Caln1
CALY	#N/A	#N/A	#N/A		#N/A	#N/A	#N/A
CAMK1	#N/A	#N/A	#N/A		#N/A	#N/A	#N/A
CAMK1D	#N/A	#N/A	#N/A		#N/A	#N/A	#N/A
CAMK1G	#N/A	#N/A	#N/A		#N/A	#N/A	#N/A
CAMK2A	#N/A	#N/A	#N/A		#N/A	#N/A	#N/A
CAMK2B	#N/A	#N/A	#N/A		#N/A	#N/A	#N/A
CAMK2D	#N/A	#N/A	#N/A		#N/A	#N/A	#N/A
CAMK2G	#N/A	#N/A	#N/A		#N/A	#N/A	#N/A
CAMK4	#N/A	#N/A	#N/A		Camk4	#N/A	#N/A
CAMKK2	#N/A	#N/A	#N/A		#N/A	#N/A	#N/A
CAMLG	#N/A	#N/A	#N/A		#N/A	#N/A	#N/A
CANT1	#N/A	#N/A	#N/A		#N/A	#N/A	#N/A
CANX	#N/A	#N/A	#N/A		#N/A	#N/A	#N/A
CARD19	#N/A	#N/A	#N/A		#N/A	#N/A	#N/A
CASD1	#N/A	#N/A	#N/A		#N/A	#N/A	#N/A
CASK	#N/A	#N/A	#N/A		#N/A	#N/A	#N/A
CASR	#N/A	#N/A	#N/A		#N/A	#N/A	#N/A
CATSPER1	#N/A	#N/A	#N/A		#N/A	#N/A	#N/A
CATSPER2	#N/A	#N/A	#N/A		#N/A	#N/A	#N/A
CATSPER3	#N/A	#N/A	#N/A		#N/A	#N/A	#N/A
CATSPER4	#N/A	#N/A	#N/A		#N/A	#N/A	#N/A
CATSPERB	#N/A	#N/A	#N/A		#N/A	#N/A	#N/A
CATSPERD	#N/A	#N/A	#N/A		#N/A	Catsperd	Catsperd
CATSPERE	#N/A	#N/A	#N/A		#N/A	#N/A	#N/A
CATSPERG	#N/A	#N/A	#N/A		#N/A	#N/A	#N/A
CAV1	#N/A	#N/A	#N/A		Cav1	#N/A	#N/A
CAV2	#N/A	#N/A	#N/A		#N/A	#N/A	#N/A
CAV3	#N/A	#N/A	#N/A		#N/A	#N/A	#N/A
CBARP	#N/A	#N/A	#N/A		#N/A	#N/A	#N/A
CCDC107	#N/A	#N/A	#N/A		#N/A	#N/A	#N/A
CCDC136	#N/A	#N/A	#N/A		Ccdc136	#N/A	#N/A
CCDC141	#N/A	#N/A	#N/A		#N/A	#N/A	#N/A
CCDC144A	#N/A	#N/A	#N/A		#N/A	#N/A	#N/A
CCDC155	#N/A	#N/A	#N/A		#N/A	#N/A	#N/A
CCDC163	#N/A	#N/A	#N/A		#N/A	#N/A	#N/A
CCDC167	#N/A	#N/A	#N/A		#N/A	#N/A	#N/A
CCDC168	#N/A	#N/A	#N/A		#N/A	#N/A	#N/A
CCDC188	#N/A	#N/A	#N/A		#N/A	#N/A	#N/A
CCDC47	#N/A	#N/A	#N/A		#N/A	#N/A	#N/A
CCDC51	#N/A	#N/A	#N/A		#N/A	#N/A	#N/A
CCDC90B	#N/A	#N/A	#N/A		#N/A	#N/A	#N/A
CCKAR	#N/A	#N/A	#N/A		Cckar	Cckar	Cckar
CCKBR	#N/A	#N/A	#N/A		#N/A	#N/A	#N/A
CCL5	#N/A	Ccl5	#N/A		#N/A	#N/A	#N/A
CCL7	#N/A	Ccl7	Ccl7		#N/A	#N/A	#N/A
CCPG1	#N/A	#N/A	#N/A		#N/A	#N/A	#N/A
CCR1	#N/A	Ccr1	Ccr1		#N/A	#N/A	#N/A
CCR10	#N/A	#N/A	#N/A		#N/A	#N/A	#N/A
CCR2	#N/A	#N/A	#N/A		#N/A	#N/A	#N/A
CCR3	#N/A	#N/A	#N/A		#N/A	#N/A	#N/A
CCR4	#N/A	#N/A	#N/A		#N/A	#N/A	#N/A
CCR5	#N/A	Ccr5	Ccr5		#N/A	#N/A	#N/A
CCR6	#N/A	#N/A	#N/A		#N/A	#N/A	#N/A
CCR7	#N/A	Ccr7	Ccr7		#N/A	#N/A	#N/A
CCR8	#N/A	#N/A	#N/A		#N/A	#N/A	#N/A
CCR9	#N/A	#N/A	#N/A		#N/A	#N/A	#N/A
CCRL2	#N/A	#N/A	#N/A		#N/A	#N/A	#N/A
CD101	#N/A	#N/A	#N/A		#N/A	#N/A	#N/A
CD109	#N/A	#N/A	#N/A		#N/A	#N/A	#N/A
CD151	#N/A	#N/A	#N/A		#N/A	#N/A	#N/A
CD163	#N/A	#N/A	#N/A		Cd163	#N/A	Cd163
CD163L1	#N/A	#N/A	#N/A		#N/A	#N/A	#N/A
CD164	#N/A	#N/A	#N/A		#N/A	#N/A	#N/A
CD164L2	#N/A	#N/A	#N/A		Cd164l2	Cd164l2	Cd164l2
CD180	#N/A	#N/A	Cd180		#N/A	#N/A	#N/A
CD19	#N/A	#N/A	#N/A		#N/A	#N/A	#N/A
CD1A	#N/A	#N/A	#N/A		#N/A	#N/A	#N/A
CD1B	#N/A	#N/A	#N/A		#N/A	#N/A	#N/A
CD1C	#N/A	#N/A	#N/A		#N/A	#N/A	#N/A
CD1D	#N/A	#N/A	#N/A		#N/A	#N/A	#N/A
CD1E	#N/A	#N/A	#N/A		#N/A	#N/A	#N/A
CD2	#N/A	#N/A	#N/A		#N/A	#N/A	#N/A
CD200	#N/A	#N/A	#N/A		#N/A	#N/A	#N/A
CD200R1	Cd200r1	Cd200r1	Cd200r1		#N/A	#N/A	#N/A
CD200R1L	#N/A	#N/A	#N/A		#N/A	#N/A	#N/A
CD207	#N/A	#N/A	#N/A		#N/A	#N/A	#N/A
CD209	#N/A	#N/A	#N/A		#N/A	#N/A	#N/A
CD22	#N/A	#N/A	Cd22		#N/A	#N/A	#N/A
CD226	#N/A	#N/A	#N/A		#N/A	#N/A	#N/A
CD244	#N/A	#N/A	Cd244		#N/A	#N/A	#N/A
CD247	#N/A	#N/A	#N/A		#N/A	#N/A	#N/A
CD248	#N/A	#N/A	#N/A		#N/A	#N/A	#N/A
CD27	#N/A	#N/A	#N/A		#N/A	#N/A	#N/A
CD274	#N/A	Cd274	Cd274		#N/A	#N/A	#N/A
CD276	Cd276	Cd276	Cd276		#N/A	#N/A	#N/A
CD28	#N/A	#N/A	#N/A		#N/A	#N/A	#N/A
CD300A	#N/A	#N/A	Cd300a		#N/A	#N/A	#N/A
CD300C	#N/A	#N/A	#N/A		#N/A	#N/A	#N/A
CD300E	#N/A	#N/A	#N/A		#N/A	#N/A	#N/A
CD300LB	#N/A	#N/A	#N/A		#N/A	#N/A	#N/A
CD300LD	#N/A	#N/A	Cd300ld		#N/A	#N/A	#N/A
CD300LF	#N/A	Cd300lf	Cd300lf		#N/A	#N/A	#N/A
CD300LG	#N/A	#N/A	#N/A		#N/A	#N/A	#N/A
CD302	#N/A	#N/A	#N/A		#N/A	#N/A	#N/A
CD320	#N/A	#N/A	#N/A		Cd320	Cd320	Cd320
CD33	#N/A	#N/A	#N/A		#N/A	#N/A	#N/A
CD34	#N/A	#N/A	#N/A		#N/A	#N/A	#N/A
CD36	#N/A	#N/A	#N/A		#N/A	#N/A	#N/A
CD37	#N/A	#N/A	#N/A		#N/A	#N/A	#N/A
CD3D	#N/A	#N/A	#N/A		#N/A	#N/A	#N/A
CD3E	#N/A	Cd3e	#N/A		#N/A	#N/A	#N/A
CD3G	#N/A	#N/A	#N/A		#N/A	#N/A	#N/A
CD4	#N/A	#N/A	#N/A		#N/A	#N/A	#N/A
CD40	#N/A	#N/A	Cd40		#N/A	#N/A	#N/A
CD40LG	#N/A	#N/A	#N/A		#N/A	#N/A	#N/A
CD44	Cd44	Cd44	Cd44		#N/A	#N/A	#N/A
CD46	#N/A	#N/A	#N/A		#N/A	#N/A	#N/A
CD47	#N/A	#N/A	#N/A		#N/A	#N/A	#N/A
CD48	#N/A	#N/A	Cd48		#N/A	#N/A	#N/A
CD5	#N/A	#N/A	#N/A		#N/A	#N/A	#N/A
CD52	#N/A	#N/A	#N/A		#N/A	#N/A	#N/A
CD53	#N/A	#N/A	Cd53		#N/A	#N/A	#N/A
CD55	#N/A	#N/A	#N/A		#N/A	#N/A	#N/A
CD58	#N/A	#N/A	#N/A		#N/A	#N/A	#N/A
CD59	#N/A	#N/A	#N/A		#N/A	#N/A	#N/A
CD6	#N/A	Cd6	#N/A		#N/A	#N/A	#N/A
CD63	#N/A	#N/A	#N/A		#N/A	#N/A	#N/A
CD68	#N/A	#N/A	Cd68		#N/A	#N/A	#N/A
CD69	#N/A	Cd69	Cd69		#N/A	#N/A	#N/A
CD7	#N/A	#N/A	#N/A		#N/A	#N/A	#N/A
CD70	#N/A	#N/A	#N/A		#N/A	#N/A	#N/A
CD72	#N/A	Cd72	Cd72		#N/A	#N/A	#N/A
CD74	#N/A	Cd74	Cd74		#N/A	#N/A	#N/A
CD79A	#N/A	#N/A	#N/A		#N/A	#N/A	#N/A
CD79B	#N/A	#N/A	#N/A		#N/A	#N/A	#N/A
CD80	#N/A	#N/A	#N/A		#N/A	#N/A	#N/A
CD81	#N/A	#N/A	#N/A		#N/A	#N/A	#N/A
CD82	#N/A	#N/A	#N/A		#N/A	#N/A	#N/A
CD83	#N/A	#N/A	Cd83		#N/A	#N/A	#N/A
CD84	#N/A	#N/A	#N/A		#N/A	#N/A	#N/A
CD86	#N/A	#N/A	Cd86		#N/A	#N/A	#N/A
CD8A	#N/A	#N/A	#N/A		#N/A	#N/A	#N/A
CD8B	#N/A	#N/A	#N/A		#N/A	#N/A	#N/A
CD8B2	#N/A	#N/A	#N/A		#N/A	#N/A	#N/A
CD9	#N/A	#N/A	#N/A		#N/A	#N/A	#N/A
CD93	#N/A	#N/A	#N/A		#N/A	#N/A	#N/A
CD96	#N/A	#N/A	#N/A		#N/A	#N/A	#N/A
CD99	#N/A	#N/A	#N/A		#N/A	#N/A	#N/A
CD99L2	#N/A	#N/A	#N/A		#N/A	#N/A	#N/A
CDAN1	#N/A	#N/A	#N/A		#N/A	#N/A	#N/A
CDC14B	#N/A	#N/A	#N/A		#N/A	#N/A	#N/A
CDCP1	#N/A	#N/A	#N/A		#N/A	#N/A	#N/A
CDCP2	#N/A	#N/A	#N/A		#N/A	#N/A	#N/A
CDH1	Cdh1	#N/A	#N/A		#N/A	#N/A	#N/A
CDH10	#N/A	#N/A	#N/A		#N/A	#N/A	#N/A
CDH11	#N/A	#N/A	Cdh11		#N/A	#N/A	#N/A
CDH12	#N/A	#N/A	#N/A		#N/A	#N/A	#N/A
CDH15	#N/A	#N/A	#N/A		#N/A	#N/A	#N/A
CDH16	#N/A	#N/A	#N/A		#N/A	#N/A	#N/A
CDH17	Cdh17	Cdh17	Cdh17		#N/A	#N/A	#N/A
CDH18	#N/A	#N/A	#N/A		#N/A	#N/A	#N/A
CDH19	#N/A	#N/A	#N/A		Cdh19	Cdh19	Cdh19
CDH2	#N/A	#N/A	#N/A		#N/A	#N/A	#N/A
CDH20	#N/A	#N/A	#N/A		#N/A	Cdh20	Cdh20
CDH22	#N/A	#N/A	#N/A		#N/A	#N/A	#N/A
CDH23	#N/A	#N/A	#N/A		#N/A	#N/A	#N/A
CDH24	Cdh24	Cdh24	Cdh24		#N/A	#N/A	#N/A
CDH26	#N/A	#N/A	#N/A		#N/A	#N/A	#N/A
CDH3	#N/A	#N/A	Cdh3		#N/A	#N/A	#N/A
CDH4	#N/A	#N/A	#N/A		#N/A	#N/A	#N/A
CDH5	#N/A	#N/A	#N/A		#N/A	#N/A	#N/A
CDH6	#N/A	#N/A	#N/A		#N/A	#N/A	#N/A
CDH7	#N/A	#N/A	#N/A		#N/A	#N/A	#N/A
CDH8	#N/A	#N/A	#N/A		Cdh8	#N/A	#N/A
CDH9	#N/A	#N/A	#N/A		#N/A	#N/A	#N/A
CDHR1	Cdhr1	Cdhr1	#N/A		#N/A	#N/A	#N/A
CDHR2	#N/A	#N/A	#N/A		#N/A	#N/A	#N/A
CDHR3	#N/A	#N/A	#N/A		#N/A	#N/A	#N/A
CDHR4	#N/A	#N/A	#N/A		#N/A	#N/A	#N/A
CDHR5	#N/A	Cdhr5	Cdhr5		#N/A	#N/A	#N/A
CDIP1	#N/A	#N/A	#N/A		#N/A	#N/A	#N/A
CDIPT	#N/A	#N/A	#N/A		#N/A	#N/A	#N/A
CDKAL1	#N/A	#N/A	#N/A		#N/A	#N/A	#N/A
CDON	#N/A	#N/A	#N/A		#N/A	#N/A	#N/A
CDRT15L2	#N/A	#N/A	#N/A		#N/A	#N/A	#N/A
CDS1	#N/A	#N/A	#N/A		#N/A	#N/A	Cds1
CDS2	#N/A	#N/A	#N/A		#N/A	#N/A	#N/A
CEACAM1	#N/A	#N/A	#N/A		#N/A	#N/A	#N/A
CEACAM19	#N/A	#N/A	#N/A		#N/A	#N/A	#N/A
CEACAM20	#N/A	#N/A	#N/A		#N/A	#N/A	#N/A
CEACAM21	#N/A	#N/A	#N/A		#N/A	#N/A	#N/A
CEACAM3	#N/A	#N/A	#N/A		#N/A	#N/A	#N/A
CEACAM4	#N/A	#N/A	#N/A		#N/A	#N/A	#N/A
CEACAM6	#N/A	#N/A	#N/A		#N/A	#N/A	#N/A
CEACAM7	#N/A	#N/A	#N/A		#N/A	#N/A	#N/A
CEBPZOS	#N/A	#N/A	#N/A		#N/A	#N/A	#N/A
CELSR1	Celsr1	Celsr1	Celsr1		#N/A	#N/A	#N/A
CELSR2	#N/A	#N/A	#N/A		#N/A	#N/A	#N/A
CELSR3	#N/A	Celsr3	#N/A		#N/A	#N/A	#N/A
CEND1	#N/A	#N/A	#N/A		Cend1	#N/A	#N/A
CEP170	#N/A	#N/A	Cep170		#N/A	#N/A	#N/A
CEP95	#N/A	#N/A	#N/A		#N/A	#N/A	#N/A
CEPT1	#N/A	#N/A	#N/A		#N/A	#N/A	#N/A
CERS1	#N/A	#N/A	#N/A		#N/A	#N/A	#N/A
CERS2	#N/A	#N/A	#N/A		#N/A	#N/A	#N/A
CERS3	#N/A	#N/A	#N/A		#N/A	#N/A	#N/A
CERS4	#N/A	#N/A	#N/A		Cers4	Cers4	Cers4
CERS5	#N/A	#N/A	#N/A		#N/A	#N/A	#N/A
CERS6	#N/A	#N/A	#N/A		Cers6	#N/A	#N/A
CES2	#N/A	#N/A	#N/A		#N/A	#N/A	#N/A
CFAP46	#N/A	#N/A	#N/A		#N/A	#N/A	#N/A
CFAP47	#N/A	#N/A	#N/A		#N/A	#N/A	#N/A
CFAP54	#N/A	#N/A	#N/A		#N/A	#N/A	#N/A
CFAP57	#N/A	#N/A	#N/A		#N/A	#N/A	#N/A
CFAP61	#N/A	#N/A	#N/A		#N/A	#N/A	#N/A
CFTR	Cftr	Cftr	Cftr		#N/A	#N/A	#N/A
CGRRF1	#N/A	#N/A	#N/A		#N/A	#N/A	#N/A
CH25H	Ch25h	Ch25h	Ch25h		#N/A	#N/A	#N/A
CHEK2	Chek2	Chek2	Chek2		#N/A	#N/A	#N/A
CHIC1	#N/A	#N/A	#N/A		#N/A	#N/A	#N/A
CHIC2	#N/A	#N/A	#N/A		#N/A	#N/A	#N/A
CHL1	Chl1	#N/A	#N/A		#N/A	#N/A	#N/A
CHML	#N/A	#N/A	#N/A		#N/A	Chml	#N/A
CHODL	#N/A	#N/A	#N/A		#N/A	#N/A	Chodl
CHPT1	#N/A	#N/A	#N/A		#N/A	#N/A	#N/A
CHRFAM7A	#N/A	#N/A	#N/A		#N/A	#N/A	#N/A
CHRM1	#N/A	#N/A	#N/A		#N/A	Chrm1	Chrm1
CHRM2	#N/A	#N/A	#N/A		Chrm2	Chrm2	Chrm2
CHRM3	#N/A	#N/A	#N/A		#N/A	Chrm3	#N/A
CHRM4	#N/A	#N/A	#N/A		#N/A	#N/A	#N/A
CHRM5	#N/A	#N/A	#N/A		#N/A	#N/A	#N/A
CHRNA1	#N/A	#N/A	#N/A		#N/A	#N/A	#N/A
CHRNA10	#N/A	#N/A	#N/A		#N/A	#N/A	#N/A
CHRNA2	#N/A	#N/A	#N/A		#N/A	#N/A	#N/A
CHRNA3	#N/A	#N/A	#N/A		#N/A	#N/A	#N/A
CHRNA4	#N/A	#N/A	#N/A		Chrna4	Chrna4	Chrna4
CHRNA5	#N/A	#N/A	#N/A		#N/A	#N/A	#N/A
CHRNA6	#N/A	#N/A	#N/A		#N/A	#N/A	#N/A
CHRNA7	#N/A	#N/A	#N/A		Chrna7	Chrna7	#N/A
CHRNA9	#N/A	#N/A	#N/A		#N/A	#N/A	#N/A
CHRNB1	#N/A	#N/A	Chrnb1		#N/A	#N/A	#N/A
CHRNB2	#N/A	#N/A	#N/A		#N/A	#N/A	Chrnb2
CHRNB3	#N/A	#N/A	#N/A		#N/A	#N/A	Chrnb3
CHRNB4	#N/A	#N/A	#N/A		#N/A	#N/A	#N/A
CHRND	#N/A	#N/A	#N/A		#N/A	#N/A	#N/A
CHRNE	#N/A	#N/A	#N/A		#N/A	#N/A	#N/A
CHRNG	#N/A	#N/A	#N/A		#N/A	#N/A	#N/A
CHST10	#N/A	#N/A	#N/A		Chst10	#N/A	#N/A
CHST12	#N/A	#N/A	#N/A		Chst12	#N/A	#N/A
CHST14	#N/A	#N/A	#N/A		#N/A	#N/A	#N/A
CHST15	#N/A	#N/A	#N/A		#N/A	#N/A	#N/A
CHST2	#N/A	#N/A	#N/A		#N/A	#N/A	#N/A
CHST3	#N/A	#N/A	#N/A		Chst3	Chst3	#N/A
CHST5	#N/A	#N/A	#N/A		#N/A	#N/A	#N/A
CHST9	Chst9	Chst9	#N/A		#N/A	#N/A	#N/A
CIP2A	#N/A	#N/A	#N/A		#N/A	#N/A	#N/A
CISD1	#N/A	#N/A	#N/A		#N/A	#N/A	#N/A
CISD2	#N/A	#N/A	#N/A		#N/A	#N/A	#N/A
CKAP4	#N/A	#N/A	#N/A		#N/A	#N/A	#N/A
CKLF	#N/A	#N/A	#N/A		#N/A	#N/A	#N/A
CKLF-CMTM1	#N/A	#N/A	#N/A		#N/A	#N/A	#N/A
CLCA2	#N/A	#N/A	#N/A		#N/A	#N/A	#N/A
CLCA4	#N/A	#N/A	#N/A		#N/A	#N/A	#N/A
CLCC1	#N/A	#N/A	#N/A		#N/A	#N/A	#N/A
CLCN1	#N/A	#N/A	#N/A		#N/A	#N/A	#N/A
CLCN2	Clcn2	Clcn2	Clcn2		#N/A	#N/A	#N/A
CLCN3	#N/A	#N/A	#N/A		#N/A	#N/A	#N/A
CLCN4	#N/A	#N/A	#N/A		#N/A	#N/A	#N/A
CLCN5	#N/A	#N/A	#N/A		#N/A	#N/A	#N/A
CLCN6	#N/A	#N/A	#N/A		#N/A	#N/A	#N/A
CLCN7	#N/A	#N/A	#N/A		#N/A	#N/A	#N/A
CLCNKA	#N/A	#N/A	#N/A		#N/A	#N/A	#N/A
CLCNKB	#N/A	#N/A	#N/A		#N/A	Clcnkb	#N/A
CLDN1	#N/A	#N/A	#N/A		Cldn1	#N/A	Cldn1
CLDN10	#N/A	#N/A	#N/A		#N/A	#N/A	Cldn10
CLDN11	#N/A	#N/A	#N/A		#N/A	#N/A	#N/A
CLDN12	#N/A	#N/A	#N/A		#N/A	#N/A	#N/A
CLDN14	#N/A	#N/A	#N/A		#N/A	#N/A	#N/A
CLDN15	#N/A	Cldn15	Cldn15		#N/A	#N/A	#N/A
CLDN16	#N/A	#N/A	#N/A		#N/A	#N/A	#N/A
CLDN17	#N/A	#N/A	#N/A		#N/A	#N/A	#N/A
CLDN18	#N/A	#N/A	#N/A		#N/A	#N/A	#N/A
CLDN19	#N/A	#N/A	#N/A		#N/A	#N/A	#N/A
CLDN2	Cldn2	Cldn2	Cldn2		#N/A	#N/A	#N/A
CLDN20	#N/A	#N/A	#N/A		#N/A	#N/A	#N/A
CLDN22	#N/A	#N/A	#N/A		#N/A	#N/A	#N/A
CLDN23	#N/A	#N/A	#N/A		#N/A	#N/A	#N/A
CLDN24	#N/A	#N/A	#N/A		#N/A	#N/A	#N/A
CLDN25	#N/A	#N/A	#N/A		#N/A	#N/A	#N/A
CLDN3	#N/A	#N/A	#N/A		#N/A	#N/A	#N/A
CLDN34	#N/A	#N/A	#N/A		#N/A	#N/A	#N/A
CLDN4	#N/A	#N/A	#N/A		#N/A	#N/A	#N/A
CLDN5	#N/A	#N/A	#N/A		#N/A	#N/A	#N/A
CLDN6	#N/A	#N/A	#N/A		#N/A	Cldn6	Cldn6
CLDN7	Cldn7	#N/A	#N/A		#N/A	#N/A	#N/A
CLDN8	#N/A	#N/A	#N/A		#N/A	Cldn8	Cldn8
CLDN9	#N/A	#N/A	#N/A		#N/A	#N/A	#N/A
CLDND1	#N/A	#N/A	#N/A		#N/A	#N/A	#N/A
CLDND2	#N/A	#N/A	#N/A		#N/A	#N/A	#N/A
CLEC10A	#N/A	#N/A	#N/A		#N/A	#N/A	#N/A
CLEC12A	#N/A	#N/A	#N/A		#N/A	#N/A	#N/A
CLEC12B	#N/A	#N/A	#N/A		#N/A	#N/A	#N/A
CLEC14A	#N/A	#N/A	#N/A		#N/A	#N/A	#N/A
CLEC17A	#N/A	#N/A	#N/A		#N/A	#N/A	#N/A
CLEC1A	#N/A	#N/A	#N/A		#N/A	#N/A	#N/A
CLEC1B	#N/A	#N/A	#N/A		#N/A	#N/A	#N/A
CLEC2A	#N/A	#N/A	#N/A		#N/A	#N/A	#N/A
CLEC2D	#N/A	#N/A	#N/A		#N/A	#N/A	#N/A
CLEC2L	#N/A	#N/A	#N/A		#N/A	#N/A	#N/A
CLEC4A	#N/A	#N/A	#N/A		#N/A	#N/A	#N/A
CLEC4C	#N/A	#N/A	#N/A		#N/A	#N/A	#N/A
CLEC4E	#N/A	Clec4e	Clec4e		#N/A	#N/A	#N/A
CLEC4F	#N/A	#N/A	#N/A		#N/A	#N/A	#N/A
CLEC4G	#N/A	#N/A	#N/A		#N/A	#N/A	#N/A
CLEC4M	#N/A	#N/A	#N/A		#N/A	#N/A	#N/A
CLEC5A	Clec5a	Clec5a	Clec5a		#N/A	#N/A	#N/A
CLEC6A	#N/A	#N/A	#N/A		#N/A	#N/A	#N/A
CLEC7A	#N/A	#N/A	#N/A		#N/A	#N/A	#N/A
CLEC9A	#N/A	#N/A	#N/A		#N/A	#N/A	#N/A
CLECL1	#N/A	#N/A	#N/A		#N/A	#N/A	#N/A
CLGN	#N/A	#N/A	#N/A		#N/A	#N/A	#N/A
CLK1	#N/A	#N/A	#N/A		#N/A	#N/A	#N/A
CLK4	#N/A	#N/A	#N/A		#N/A	#N/A	#N/A
CLMN	Clmn	Clmn	Clmn		#N/A	#N/A	#N/A
CLMP	#N/A	#N/A	#N/A		#N/A	#N/A	#N/A
CLN3	#N/A	#N/A	#N/A		#N/A	#N/A	#N/A
CLN5	#N/A	#N/A	#N/A		#N/A	#N/A	#N/A
CLN6	#N/A	#N/A	#N/A		#N/A	#N/A	#N/A
CLN8	#N/A	#N/A	#N/A		#N/A	#N/A	#N/A
CLPTM1	#N/A	#N/A	#N/A		#N/A	#N/A	#N/A
CLPTM1L	#N/A	#N/A	#N/A		#N/A	#N/A	#N/A
CLRN1	#N/A	#N/A	#N/A		#N/A	#N/A	#N/A
CLRN2	#N/A	#N/A	#N/A		#N/A	#N/A	#N/A
CLRN3	#N/A	Clrn3	Clrn3		#N/A	#N/A	#N/A
CLSTN1	#N/A	#N/A	#N/A		#N/A	#N/A	Clstn1
CLSTN2	#N/A	#N/A	#N/A		Clstn2	Clstn2	#N/A
CLSTN3	#N/A	#N/A	#N/A		#N/A	#N/A	#N/A
CLTRN	#N/A	#N/A	#N/A		#N/A	#N/A	#N/A
CLYBL	#N/A	#N/A	#N/A		#N/A	#N/A	#N/A
CMKLR1	#N/A	#N/A	#N/A		#N/A	#N/A	#N/A
CMTM1	#N/A	#N/A	#N/A		#N/A	#N/A	#N/A
CMTM2	#N/A	#N/A	#N/A		#N/A	#N/A	#N/A
CMTM3	#N/A	#N/A	#N/A		#N/A	#N/A	#N/A
CMTM4	#N/A	#N/A	#N/A		#N/A	#N/A	#N/A
CMTM5	#N/A	#N/A	#N/A		#N/A	#N/A	#N/A
CMTM6	#N/A	#N/A	#N/A		#N/A	#N/A	#N/A
CMTM7	#N/A	#N/A	#N/A		#N/A	#N/A	#N/A
CMTM8	#N/A	#N/A	#N/A		#N/A	#N/A	#N/A
CMTR2	#N/A	#N/A	#N/A		#N/A	#N/A	#N/A
CNEP1R1	#N/A	#N/A	#N/A		#N/A	#N/A	#N/A
CNGA1	#N/A	#N/A	#N/A		#N/A	#N/A	#N/A
CNGA2	#N/A	#N/A	#N/A		#N/A	#N/A	#N/A
CNGA3	#N/A	#N/A	#N/A		#N/A	#N/A	#N/A
CNGA4	#N/A	#N/A	#N/A		#N/A	#N/A	#N/A
CNGB1	#N/A	#N/A	#N/A		#N/A	#N/A	#N/A
CNGB3	#N/A	#N/A	#N/A		#N/A	#N/A	#N/A
CNIH1	#N/A	#N/A	#N/A		#N/A	#N/A	#N/A
CNIH2	#N/A	#N/A	Cnih2		#N/A	#N/A	#N/A
CNIH3	#N/A	#N/A	#N/A		#N/A	#N/A	#N/A
CNIH4	#N/A	#N/A	#N/A		#N/A	#N/A	#N/A
CNMD	#N/A	#N/A	#N/A		#N/A	#N/A	#N/A
CNNM1	#N/A	#N/A	#N/A		Cnnm1	Cnnm1	Cnnm1
CNNM2	#N/A	#N/A	#N/A		#N/A	#N/A	#N/A
CNNM3	#N/A	#N/A	#N/A		#N/A	#N/A	#N/A
CNNM4	#N/A	#N/A	#N/A		#N/A	#N/A	#N/A
CNOT1	#N/A	#N/A	#N/A		#N/A	#N/A	#N/A
CNPPD1	#N/A	#N/A	#N/A		#N/A	#N/A	#N/A
CNR1	#N/A	#N/A	#N/A		#N/A	#N/A	#N/A
CNR2	#N/A	#N/A	Cnr2		#N/A	#N/A	#N/A
CNST	#N/A	#N/A	#N/A		#N/A	#N/A	#N/A
CNTD1	#N/A	#N/A	#N/A		#N/A	#N/A	#N/A
CNTFR	#N/A	#N/A	#N/A		#N/A	#N/A	Cntfr
CNTN6	#N/A	#N/A	#N/A		#N/A	#N/A	#N/A
CNTNAP1	#N/A	#N/A	#N/A		#N/A	#N/A	#N/A
CNTNAP2	#N/A	#N/A	#N/A		Cntnap2	Cntnap2	Cntnap2
CNTNAP3	#N/A	#N/A	#N/A		#N/A	#N/A	#N/A
CNTNAP3B	#N/A	#N/A	#N/A		#N/A	#N/A	#N/A
CNTNAP4	#N/A	#N/A	#N/A		#N/A	#N/A	#N/A
CNTNAP5	#N/A	#N/A	#N/A		#N/A	#N/A	#N/A
COA1	#N/A	#N/A	#N/A		#N/A	#N/A	#N/A
COA3	#N/A	#N/A	#N/A		#N/A	#N/A	#N/A
COL13A1	#N/A	#N/A	#N/A		Col13a1	#N/A	#N/A
COL17A1	#N/A	#N/A	#N/A		#N/A	#N/A	#N/A
COL25A1	Col25a1	Col25a1	Col25a1		#N/A	#N/A	#N/A
COLEC12	#N/A	#N/A	#N/A		#N/A	#N/A	#N/A
COMT	#N/A	#N/A	#N/A		#N/A	#N/A	#N/A
COQ2	#N/A	#N/A	#N/A		#N/A	#N/A	#N/A
COQ7	#N/A	#N/A	#N/A		#N/A	#N/A	#N/A
CORIN	#N/A	#N/A	#N/A		#N/A	#N/A	#N/A
COX10	#N/A	#N/A	#N/A		#N/A	#N/A	#N/A
COX11	#N/A	#N/A	#N/A		#N/A	#N/A	#N/A
COX14	#N/A	#N/A	#N/A		#N/A	#N/A	#N/A
COX15	#N/A	#N/A	#N/A		#N/A	#N/A	#N/A
COX18	#N/A	#N/A	#N/A		#N/A	#N/A	#N/A
COX20	#N/A	#N/A	#N/A		#N/A	#N/A	#N/A
COX4I1	#N/A	#N/A	#N/A		#N/A	#N/A	#N/A
COX4I2	#N/A	#N/A	#N/A		#N/A	#N/A	#N/A
COX6A1	#N/A	#N/A	#N/A		#N/A	#N/A	#N/A
COX6C	#N/A	#N/A	#N/A		#N/A	#N/A	#N/A
COX7A1	#N/A	#N/A	#N/A		#N/A	#N/A	#N/A
COX7A2	#N/A	#N/A	#N/A		#N/A	#N/A	#N/A
COX7A2L	#N/A	#N/A	#N/A		#N/A	#N/A	#N/A
COX7B	#N/A	#N/A	#N/A		#N/A	#N/A	#N/A
COX7B2	#N/A	#N/A	#N/A		#N/A	#N/A	#N/A
COX7C	#N/A	#N/A	#N/A		#N/A	#N/A	#N/A
COX8A	#N/A	#N/A	#N/A		#N/A	#N/A	#N/A
COX8C	#N/A	#N/A	#N/A		#N/A	#N/A	#N/A
CPD	#N/A	#N/A	#N/A		#N/A	#N/A	#N/A
CPM	#N/A	#N/A	#N/A		#N/A	#N/A	#N/A
CPOX	#N/A	#N/A	#N/A		#N/A	#N/A	#N/A
CPT1A	#N/A	#N/A	#N/A		#N/A	#N/A	#N/A
CPT1B	#N/A	#N/A	#N/A		#N/A	#N/A	#N/A
CPT1C	#N/A	#N/A	#N/A		#N/A	#N/A	#N/A
CR1	#N/A	#N/A	#N/A		#N/A	#N/A	#N/A
CR2	#N/A	#N/A	#N/A		#N/A	#N/A	#N/A
CRB1	#N/A	#N/A	#N/A		#N/A	#N/A	#N/A
CRB2	#N/A	#N/A	#N/A		#N/A	#N/A	#N/A
CRB3	#N/A	#N/A	#N/A		#N/A	#N/A	#N/A
CREB3	#N/A	#N/A	#N/A		#N/A	#N/A	#N/A
CREB3L1	#N/A	#N/A	#N/A		Creb3l1	#N/A	#N/A
CREB3L2	#N/A	#N/A	#N/A		#N/A	#N/A	#N/A
CREB3L3	#N/A	#N/A	#N/A		#N/A	#N/A	#N/A
CREB3L4	#N/A	#N/A	#N/A		#N/A	#N/A	#N/A
CRELD1	#N/A	#N/A	#N/A		#N/A	#N/A	#N/A
CRHR1	#N/A	#N/A	#N/A		#N/A	#N/A	#N/A
CRHR2	#N/A	#N/A	#N/A		#N/A	#N/A	#N/A
CRIM1	#N/A	#N/A	#N/A		#N/A	#N/A	#N/A
CRLF2	#N/A	#N/A	#N/A		#N/A	#N/A	#N/A
CRLS1	#N/A	#N/A	#N/A		#N/A	#N/A	#N/A
CRTAM	#N/A	#N/A	#N/A		#N/A	#N/A	#N/A
CRYAB	#N/A	#N/A	#N/A		#N/A	#N/A	#N/A
CS	#N/A	#N/A	#N/A		#N/A	#N/A	#N/A
CSF1	#N/A	#N/A	#N/A		#N/A	#N/A	#N/A
CSF1R	#N/A	#N/A	#N/A		#N/A	#N/A	#N/A
CSF2RA	Csf2ra	Csf2ra	Csf2ra		#N/A	#N/A	#N/A
CSF2RB	#N/A	#N/A	Csf2rb		#N/A	#N/A	#N/A
CSF3R	#N/A	Csf3r	Csf3r		#N/A	#N/A	#N/A
CSMD1	#N/A	#N/A	#N/A		Csmd1	#N/A	#N/A
CSMD2	#N/A	#N/A	#N/A		#N/A	#N/A	#N/A
CSMD3	#N/A	#N/A	#N/A		#N/A	#N/A	#N/A
CSNK1G1	#N/A	#N/A	#N/A		#N/A	#N/A	#N/A
CSPG4	#N/A	#N/A	Cspg4		#N/A	#N/A	#N/A
CSPG5	#N/A	#N/A	#N/A		#N/A	#N/A	#N/A
CTAGE1	#N/A	#N/A	#N/A		#N/A	#N/A	#N/A
CTAGE15	#N/A	#N/A	#N/A		#N/A	#N/A	#N/A
CTAGE4	#N/A	#N/A	#N/A		#N/A	#N/A	#N/A
CTAGE5	#N/A	#N/A	#N/A		#N/A	#N/A	#N/A
CTAGE6	#N/A	#N/A	#N/A		#N/A	#N/A	#N/A
CTAGE8	#N/A	#N/A	#N/A		#N/A	#N/A	#N/A
CTAGE9	#N/A	#N/A	#N/A		#N/A	#N/A	#N/A
CTCFL	#N/A	#N/A	#N/A		#N/A	#N/A	#N/A
CTDNEP1	#N/A	#N/A	#N/A		#N/A	#N/A	#N/A
CTLA4	#N/A	#N/A	#N/A		#N/A	#N/A	#N/A
CTNS	#N/A	#N/A	#N/A		#N/A	Ctns	Ctns
CTSK	#N/A	#N/A	#N/A		#N/A	#N/A	#N/A
CTXN1	#N/A	#N/A	Ctxn1		#N/A	#N/A	#N/A
CTXN2	#N/A	#N/A	#N/A		#N/A	#N/A	#N/A
CTXN3	#N/A	#N/A	#N/A		#N/A	#N/A	#N/A
CTXND1	#N/A	#N/A	#N/A		#N/A	#N/A	#N/A
CTXND2	#N/A	#N/A	#N/A		#N/A	#N/A	#N/A
CUX1	#N/A	#N/A	#N/A		#N/A	#N/A	#N/A
CUX2	#N/A	#N/A	#N/A		Cux2	#N/A	#N/A
CUZD1	#N/A	#N/A	#N/A		#N/A	#N/A	#N/A
CWH43	#N/A	#N/A	Cwh43		#N/A	#N/A	#N/A
CX3CL1	Cx3cl1	#N/A	#N/A		#N/A	#N/A	#N/A
CX3CR1	#N/A	Cx3cr1	Cx3cr1		#N/A	#N/A	#N/A
CXADR	Cxadr	Cxadr	#N/A		#N/A	#N/A	#N/A
CXCL16	Cxcl16	Cxcl16	Cxcl16		#N/A	#N/A	#N/A
CXCR1	#N/A	#N/A	#N/A		#N/A	#N/A	#N/A
CXCR2	#N/A	#N/A	#N/A		#N/A	#N/A	#N/A
CXCR3	#N/A	#N/A	#N/A		#N/A	#N/A	#N/A
CXCR4	#N/A	Cxcr4	Cxcr4		#N/A	#N/A	#N/A
CXCR5	#N/A	#N/A	#N/A		#N/A	#N/A	#N/A
CXCR6	#N/A	#N/A	#N/A		#N/A	#N/A	#N/A
CXorf66	#N/A	#N/A	#N/A		#N/A	#N/A	#N/A
CYB561	#N/A	#N/A	#N/A		#N/A	#N/A	#N/A
CYB561A3	#N/A	#N/A	#N/A		#N/A	#N/A	#N/A
CYB561D1	#N/A	#N/A	#N/A		#N/A	#N/A	#N/A
CYB561D2	#N/A	#N/A	#N/A		#N/A	#N/A	#N/A
CYB5A	#N/A	#N/A	#N/A		#N/A	#N/A	#N/A
CYB5B	#N/A	#N/A	#N/A		#N/A	#N/A	Cyb5b
CYB5R2	#N/A	#N/A	#N/A		#N/A	#N/A	#N/A
CYB5R3	#N/A	#N/A	#N/A		#N/A	#N/A	#N/A
CYBA	Cyba	Cyba	Cyba		#N/A	#N/A	#N/A
CYBB	#N/A	#N/A	Cybb		#N/A	#N/A	#N/A
CYBRD1	#N/A	#N/A	#N/A		#N/A	#N/A	#N/A
CYC1	#N/A	#N/A	#N/A		#N/A	#N/A	#N/A
CYHR1	#N/A	#N/A	#N/A		#N/A	#N/A	#N/A
CYP19A1	#N/A	#N/A	#N/A		#N/A	#N/A	#N/A
CYP1A1	#N/A	#N/A	#N/A		Cyp1a1	Cyp1a1	Cyp1a1
CYP1A2	#N/A	#N/A	#N/A		#N/A	#N/A	#N/A
CYP1B1	#N/A	#N/A	#N/A		#N/A	#N/A	#N/A
CYP20A1	#N/A	#N/A	#N/A		Cyp20a1	Cyp20a1	Cyp20a1
CYP26C1	#N/A	#N/A	#N/A		#N/A	#N/A	#N/A
CYP2D6	#N/A	#N/A	#N/A		#N/A	#N/A	#N/A
CYP2S1	#N/A	#N/A	#N/A		#N/A	#N/A	#N/A
CYP2U1	#N/A	#N/A	#N/A		#N/A	#N/A	#N/A
CYP39A1	#N/A	#N/A	#N/A		#N/A	#N/A	#N/A
CYP3A4	#N/A	#N/A	#N/A		#N/A	#N/A	#N/A
CYP3A43	#N/A	#N/A	#N/A		#N/A	#N/A	#N/A
CYP3A5	#N/A	#N/A	#N/A		#N/A	#N/A	#N/A
CYP3A7	#N/A	#N/A	#N/A		#N/A	#N/A	#N/A
CYP3A7-CYP3A51P	#N/A	#N/A	#N/A		#N/A	#N/A	#N/A
CYP4A11	#N/A	#N/A	#N/A		#N/A	#N/A	#N/A
CYP4A22	#N/A	#N/A	#N/A		#N/A	#N/A	#N/A
CYP4B1	#N/A	#N/A	#N/A		#N/A	#N/A	#N/A
CYP4F12	#N/A	#N/A	#N/A		#N/A	#N/A	#N/A
CYP4F2	#N/A	#N/A	#N/A		#N/A	#N/A	#N/A
CYP4F22	#N/A	#N/A	#N/A		#N/A	#N/A	#N/A
CYP4F8	#N/A	#N/A	#N/A		#N/A	#N/A	#N/A
CYP4V2	#N/A	#N/A	#N/A		#N/A	#N/A	#N/A
CYP4X1	#N/A	#N/A	#N/A		#N/A	#N/A	#N/A
CYP4Z1	#N/A	#N/A	#N/A		#N/A	#N/A	#N/A
CYP51A1	#N/A	#N/A	#N/A		#N/A	#N/A	#N/A
CYP7B1	#N/A	#N/A	#N/A		#N/A	#N/A	#N/A
CYP8B1	#N/A	#N/A	#N/A		#N/A	#N/A	#N/A
CYSLTR1	#N/A	#N/A	#N/A		#N/A	#N/A	#N/A
CYSLTR2	#N/A	#N/A	#N/A		#N/A	#N/A	#N/A
CYYR1	#N/A	#N/A	#N/A		#N/A	#N/A	#N/A
DAD1	#N/A	#N/A	#N/A		#N/A	#N/A	#N/A
DAG1	#N/A	#N/A	#N/A		#N/A	#N/A	#N/A
DAGLA	#N/A	#N/A	#N/A		#N/A	#N/A	#N/A
DAGLB	#N/A	#N/A	#N/A		#N/A	#N/A	#N/A
DAPK1	#N/A	#N/A	#N/A		#N/A	#N/A	#N/A
DAPK2	#N/A	Dapk2	Dapk2		#N/A	#N/A	#N/A
DAPK3	#N/A	#N/A	#N/A		#N/A	#N/A	#N/A
DAPL1	Dapl1	Dapl1	Dapl1		#N/A	#N/A	#N/A
DCAF17	#N/A	#N/A	#N/A		#N/A	#N/A	#N/A
DCAKD	#N/A	#N/A	Dcakd		#N/A	#N/A	#N/A
DCBLD1	Dcbld1	Dcbld1	Dcbld1		#N/A	#N/A	#N/A
DCBLD2	#N/A	#N/A	#N/A		#N/A	#N/A	#N/A
DCC	#N/A	#N/A	#N/A		#N/A	#N/A	#N/A
DCHS1	#N/A	#N/A	#N/A		#N/A	#N/A	#N/A
DCHS2	#N/A	#N/A	#N/A		#N/A	#N/A	#N/A
DCLK1	#N/A	Dclk1	Dclk1		#N/A	#N/A	#N/A
DCLK3	#N/A	#N/A	#N/A		#N/A	Dclk3	Dclk3
DCP1B	#N/A	#N/A	#N/A		#N/A	#N/A	#N/A
DCST1	#N/A	#N/A	#N/A		#N/A	#N/A	#N/A
DCST2	#N/A	#N/A	#N/A		#N/A	#N/A	#N/A
DCSTAMP	#N/A	#N/A	Dcstamp		#N/A	#N/A	#N/A
DCT	#N/A	#N/A	#N/A		#N/A	#N/A	#N/A
DDO	#N/A	#N/A	#N/A		#N/A	#N/A	#N/A
DDOST	#N/A	#N/A	#N/A		#N/A	#N/A	#N/A
DDR1	#N/A	#N/A	#N/A		#N/A	#N/A	#N/A
DDR2	#N/A	#N/A	#N/A		Ddr2	#N/A	#N/A
DDX3X	#N/A	#N/A	#N/A		#N/A	#N/A	#N/A
DEGS1	#N/A	#N/A	#N/A		#N/A	#N/A	#N/A
DEGS2	#N/A	#N/A	#N/A		#N/A	Degs2	Degs2
DENND1A	#N/A	#N/A	#N/A		#N/A	#N/A	#N/A
DENND1B	#N/A	#N/A	#N/A		#N/A	#N/A	#N/A
DENND3	#N/A	#N/A	#N/A		#N/A	#N/A	#N/A
DENND4B	#N/A	#N/A	#N/A		#N/A	#N/A	#N/A
DENND4C	#N/A	#N/A	#N/A		#N/A	#N/A	#N/A
DENND5A	#N/A	#N/A	#N/A		#N/A	#N/A	#N/A
DENND5B	#N/A	#N/A	#N/A		#N/A	#N/A	#N/A
DERL1	#N/A	#N/A	#N/A		#N/A	#N/A	#N/A
DERL2	#N/A	#N/A	#N/A		#N/A	#N/A	#N/A
DERL3	#N/A	#N/A	#N/A		Derl3	Derl3	Derl3
DEUP1	#N/A	#N/A	#N/A		#N/A	#N/A	#N/A
DEXI	#N/A	#N/A	#N/A		#N/A	#N/A	#N/A
DGAT1	#N/A	#N/A	#N/A		#N/A	#N/A	#N/A
DGAT2	#N/A	#N/A	#N/A		#N/A	#N/A	#N/A
DGAT2L6	#N/A	#N/A	#N/A		#N/A	#N/A	#N/A
DGCR2	#N/A	#N/A	#N/A		#N/A	#N/A	#N/A
DGKE	#N/A	#N/A	#N/A		#N/A	#N/A	#N/A
DHCR24	Dhcr24	Dhcr24	Dhcr24		#N/A	#N/A	#N/A
DHCR7	Dhcr7	#N/A	Dhcr7		#N/A	#N/A	#N/A
DHODH	#N/A	#N/A	#N/A		#N/A	#N/A	#N/A
DHRS3	Dhrs3	Dhrs3	#N/A		#N/A	#N/A	#N/A
DHRS7B	#N/A	#N/A	#N/A		#N/A	#N/A	#N/A
DHRS9	Dhrs9	Dhrs9	Dhrs9		#N/A	#N/A	#N/A
DHX36	#N/A	#N/A	#N/A		#N/A	#N/A	#N/A
DIABLO	#N/A	#N/A	#N/A		#N/A	#N/A	#N/A
DIABLO	#N/A	#N/A	#N/A		#N/A	#N/A	#N/A
DIO1	#N/A	Dio1	Dio1		#N/A	#N/A	#N/A
DIO2	#N/A	#N/A	#N/A		#N/A	#N/A	#N/A
DIO3	#N/A	#N/A	#N/A		#N/A	#N/A	#N/A
DIP2A	#N/A	#N/A	#N/A		#N/A	#N/A	#N/A
DIP2C	#N/A	#N/A	#N/A		#N/A	#N/A	#N/A
DIRC2	#N/A	#N/A	#N/A		#N/A	#N/A	#N/A
DISP1	#N/A	#N/A	#N/A		#N/A	#N/A	#N/A
DISP2	#N/A	#N/A	#N/A		#N/A	#N/A	#N/A
DISP3	#N/A	#N/A	#N/A		#N/A	#N/A	#N/A
DLK1	#N/A	#N/A	#N/A		#N/A	#N/A	#N/A
DLK2	#N/A	#N/A	#N/A		Dlk2	Dlk2	Dlk2
DLL1	#N/A	#N/A	#N/A		#N/A	#N/A	#N/A
DLL3	#N/A	#N/A	#N/A		#N/A	#N/A	#N/A
DLL4	#N/A	Dll4	Dll4		#N/A	#N/A	#N/A
DMAC1	#N/A	#N/A	#N/A		#N/A	#N/A	#N/A
DMPK	#N/A	#N/A	#N/A		Dmpk	Dmpk	Dmpk
DMRT2	#N/A	#N/A	#N/A		#N/A	#N/A	#N/A
DMXL2	#N/A	#N/A	#N/A		#N/A	#N/A	#N/A
DNAH2	#N/A	#N/A	#N/A		#N/A	#N/A	#N/A
DNAJB12	#N/A	#N/A	#N/A		#N/A	#N/A	#N/A
DNAJB14	#N/A	#N/A	#N/A		#N/A	#N/A	#N/A
DNAJC1	#N/A	#N/A	#N/A		#N/A	#N/A	#N/A
DNAJC10	#N/A	#N/A	#N/A		#N/A	Dnajc10	Dnajc10
DNAJC11	#N/A	#N/A	#N/A		#N/A	#N/A	#N/A
DNAJC13	#N/A	#N/A	#N/A		#N/A	#N/A	#N/A
DNAJC14	#N/A	#N/A	#N/A		#N/A	#N/A	#N/A
DNAJC15	#N/A	#N/A	#N/A		#N/A	#N/A	#N/A
DNAJC16	#N/A	#N/A	#N/A		#N/A	#N/A	#N/A
DNAJC18	#N/A	#N/A	#N/A		#N/A	#N/A	#N/A
DNAJC22	Dnajc22	Dnajc22	Dnajc22		#N/A	#N/A	#N/A
DNAJC25	#N/A	#N/A	#N/A		#N/A	#N/A	#N/A
DNAJC30	#N/A	#N/A	#N/A		#N/A	#N/A	#N/A
DNAJC4	#N/A	#N/A	#N/A		#N/A	#N/A	#N/A
DNAJC5	#N/A	#N/A	#N/A		#N/A	#N/A	#N/A
DNAJC5B	#N/A	#N/A	#N/A		#N/A	#N/A	#N/A
DNAJC5G	#N/A	#N/A	#N/A		#N/A	#N/A	#N/A
DNER	#N/A	#N/A	#N/A		Dner	Dner	#N/A
DNPEP	#N/A	#N/A	#N/A		#N/A	#N/A	#N/A
DOK7	#N/A	#N/A	#N/A		#N/A	#N/A	#N/A
DOLK	#N/A	#N/A	#N/A		#N/A	#N/A	#N/A
DOLPP1	#N/A	#N/A	#N/A		#N/A	#N/A	#N/A
DONSON	#N/A	#N/A	Donson		#N/A	#N/A	#N/A
DOPEY1	#N/A	#N/A	#N/A		#N/A	#N/A	#N/A
DPAGT1	#N/A	#N/A	#N/A		#N/A	#N/A	#N/A
DPCR1	#N/A	#N/A	#N/A		#N/A	#N/A	#N/A
DPEP2	#N/A	#N/A	Dpep2		#N/A	#N/A	#N/A
DPM2	#N/A	#N/A	#N/A		#N/A	#N/A	#N/A
DPM3	#N/A	#N/A	#N/A		#N/A	#N/A	#N/A
DPP10	#N/A	#N/A	#N/A		#N/A	#N/A	#N/A
DPP4	#N/A	#N/A	#N/A		#N/A	#N/A	#N/A
DPP6	#N/A	#N/A	#N/A		Dpp6	Dpp6	#N/A
DPY19L1	#N/A	#N/A	Dpy19l1		#N/A	#N/A	#N/A
DPY19L2	#N/A	#N/A	#N/A		#N/A	#N/A	#N/A
DPY19L3	#N/A	#N/A	#N/A		#N/A	#N/A	#N/A
DPY19L4	#N/A	#N/A	#N/A		#N/A	#N/A	#N/A
DRAM1	Dram1	Dram1	Dram1		#N/A	#N/A	#N/A
DRAM2	#N/A	#N/A	#N/A		#N/A	#N/A	#N/A
DRD1	#N/A	#N/A	#N/A		#N/A	#N/A	#N/A
DRD2	#N/A	#N/A	#N/A		#N/A	#N/A	#N/A
DRD3	#N/A	#N/A	#N/A		#N/A	#N/A	#N/A
DRD4	#N/A	#N/A	#N/A		#N/A	#N/A	#N/A
DRD5	#N/A	#N/A	#N/A		#N/A	#N/A	#N/A
DSC1	#N/A	#N/A	#N/A		#N/A	Dsc1	Dsc1
DSC2	#N/A	Dsc2	Dsc2		#N/A	#N/A	#N/A
DSC3	#N/A	Dsc3	#N/A		#N/A	#N/A	#N/A
DSCAM	#N/A	#N/A	#N/A		Dscam	Dscam	Dscam
DSCAML1	#N/A	#N/A	#N/A		#N/A	#N/A	#N/A
DSE	#N/A	#N/A	#N/A		#N/A	#N/A	#N/A
DSEL	#N/A	#N/A	#N/A		#N/A	#N/A	#N/A
DSG1	#N/A	#N/A	#N/A		#N/A	#N/A	#N/A
DSG2	#N/A	#N/A	#N/A		#N/A	#N/A	#N/A
DSG3	#N/A	#N/A	#N/A		#N/A	#N/A	#N/A
DSG4	#N/A	#N/A	#N/A		#N/A	#N/A	#N/A
DTNA	#N/A	#N/A	#N/A		#N/A	#N/A	#N/A
DUOX1	#N/A	#N/A	#N/A		#N/A	#N/A	#N/A
DUOX2	#N/A	Duox2	Duox2		#N/A	#N/A	#N/A
DUOXA1	#N/A	#N/A	#N/A		#N/A	#N/A	#N/A
DUOXA2	#N/A	Duoxa2	Duoxa2		#N/A	#N/A	#N/A
DUSP13	#N/A	#N/A	#N/A		#N/A	#N/A	#N/A
DWORF	#N/A	#N/A	#N/A		#N/A	#N/A	#N/A
DYM	#N/A	#N/A	#N/A		#N/A	#N/A	#N/A
DYNAP	#N/A	#N/A	#N/A		#N/A	#N/A	#N/A
DYRK2	#N/A	#N/A	#N/A		#N/A	#N/A	#N/A
DYSF	#N/A	#N/A	#N/A		#N/A	#N/A	#N/A
DZIP3	#N/A	#N/A	#N/A		#N/A	#N/A	#N/A
E2F5	#N/A	#N/A	#N/A		#N/A	#N/A	#N/A
EBLN1	#N/A	#N/A	#N/A		#N/A	#N/A	#N/A
EBP	#N/A	#N/A	#N/A		#N/A	#N/A	#N/A
EBPL	#N/A	#N/A	#N/A		#N/A	#N/A	#N/A
ECE1	#N/A	#N/A	#N/A		#N/A	#N/A	#N/A
ECE2	#N/A	#N/A	#N/A		#N/A	#N/A	#N/A
ECEL1	#N/A	#N/A	#N/A		#N/A	#N/A	#N/A
ECSCR	#N/A	#N/A	#N/A		#N/A	#N/A	#N/A
EDA	#N/A	#N/A	#N/A		#N/A	#N/A	#N/A
EDA2R	#N/A	#N/A	#N/A		#N/A	#N/A	#N/A
EDAR	#N/A	#N/A	#N/A		#N/A	#N/A	Edar
EDNRA	#N/A	#N/A	#N/A		#N/A	#N/A	#N/A
EDNRB	#N/A	#N/A	#N/A		#N/A	#N/A	#N/A
EDRF1	#N/A	#N/A	#N/A		#N/A	#N/A	#N/A
EEF1AKMT4-ECE2	#N/A	#N/A	#N/A		#N/A	#N/A	#N/A
EEF1E1	#N/A	#N/A	#N/A		#N/A	#N/A	#N/A
EFCAB14	#N/A	#N/A	#N/A		#N/A	#N/A	#N/A
EFNA3	#N/A	#N/A	#N/A		#N/A	#N/A	#N/A
EFNA4	#N/A	#N/A	#N/A		#N/A	#N/A	#N/A
EFNA5	#N/A	#N/A	#N/A		#N/A	#N/A	#N/A
EFNB1	#N/A	Efnb1	Efnb1		#N/A	#N/A	#N/A
EFNB2	Efnb2	Efnb2	Efnb2		#N/A	#N/A	#N/A
EFNB3	#N/A	#N/A	#N/A		#N/A	#N/A	#N/A
EGF	#N/A	#N/A	#N/A		Egf	Egf	Egf
EGFR	#N/A	#N/A	#N/A		#N/A	#N/A	#N/A
EI24	#N/A	#N/A	#N/A		#N/A	#N/A	#N/A
EIF2AK3	#N/A	#N/A	#N/A		#N/A	#N/A	#N/A
EIF3L	#N/A	#N/A	#N/A		#N/A	#N/A	#N/A
ELFN1	#N/A	#N/A	#N/A		#N/A	#N/A	#N/A
ELFN2	#N/A	#N/A	#N/A		#N/A	#N/A	#N/A
ELMOD1	#N/A	#N/A	#N/A		#N/A	#N/A	#N/A
ELOVL1	#N/A	#N/A	#N/A		#N/A	#N/A	#N/A
ELOVL2	#N/A	#N/A	#N/A		#N/A	#N/A	#N/A
ELOVL3	#N/A	#N/A	#N/A		#N/A	#N/A	#N/A
ELOVL4	#N/A	#N/A	#N/A		#N/A	Elovl4	#N/A
ELOVL5	#N/A	#N/A	#N/A		#N/A	#N/A	#N/A
ELOVL6	#N/A	#N/A	#N/A		#N/A	#N/A	#N/A
ELOVL7	#N/A	#N/A	#N/A		#N/A	#N/A	#N/A
ELP6	#N/A	#N/A	#N/A		#N/A	#N/A	#N/A
EMB	#N/A	#N/A	#N/A		#N/A	#N/A	#N/A
EMC1	#N/A	#N/A	#N/A		#N/A	#N/A	#N/A
EMC10	#N/A	#N/A	#N/A		#N/A	#N/A	#N/A
EMC3	#N/A	#N/A	#N/A		#N/A	#N/A	#N/A
EMC4	#N/A	#N/A	#N/A		#N/A	#N/A	#N/A
EMC6	#N/A	#N/A	#N/A		#N/A	#N/A	#N/A
EMC7	#N/A	#N/A	#N/A		#N/A	#N/A	#N/A
EMCN	#N/A	#N/A	#N/A		#N/A	#N/A	#N/A
EMD	#N/A	#N/A	#N/A		#N/A	#N/A	#N/A
EMP1	#N/A	#N/A	#N/A		#N/A	#N/A	#N/A
EMP2	Emp2	#N/A	#N/A		#N/A	#N/A	#N/A
EMP3	#N/A	#N/A	#N/A		#N/A	#N/A	#N/A
ENDOD1	#N/A	#N/A	#N/A		#N/A	#N/A	#N/A
ENG	#N/A	#N/A	#N/A		#N/A	#N/A	#N/A
ENPEP	#N/A	#N/A	#N/A		#N/A	#N/A	#N/A
ENPP1	#N/A	#N/A	#N/A		#N/A	#N/A	#N/A
ENPP2	#N/A	#N/A	#N/A		#N/A	#N/A	#N/A
ENPP4	#N/A	#N/A	#N/A		#N/A	#N/A	#N/A
ENPP5	#N/A	#N/A	#N/A		#N/A	#N/A	#N/A
ENTPD1	#N/A	#N/A	#N/A		#N/A	#N/A	#N/A
ENTPD2	#N/A	#N/A	#N/A		#N/A	#N/A	#N/A
ENTPD3	#N/A	#N/A	#N/A		#N/A	Entpd3	Entpd3
ENTPD4	#N/A	#N/A	#N/A		#N/A	#N/A	#N/A
ENTPD6	#N/A	#N/A	#N/A		#N/A	#N/A	#N/A
ENTPD7	#N/A	#N/A	#N/A		#N/A	#N/A	#N/A
ENTPD8	Entpd8	Entpd8	Entpd8		#N/A	#N/A	#N/A
EOGT	#N/A	#N/A	#N/A		#N/A	#N/A	#N/A
EPB41	#N/A	#N/A	#N/A		#N/A	#N/A	#N/A
EPB41L2	#N/A	#N/A	#N/A		#N/A	#N/A	#N/A
EPB41L3	#N/A	#N/A	#N/A		#N/A	#N/A	#N/A
EPCAM	#N/A	#N/A	#N/A		#N/A	#N/A	#N/A
EPGN	#N/A	#N/A	#N/A		#N/A	#N/A	#N/A
EPHA1	#N/A	#N/A	#N/A		#N/A	#N/A	#N/A
EPHA10	#N/A	#N/A	#N/A		#N/A	#N/A	#N/A
EPHA2	Epha2	Epha2	Epha2		#N/A	#N/A	#N/A
EPHA3	#N/A	#N/A	#N/A		Epha3	Epha3	#N/A
EPHA4	Epha4	Epha4	#N/A		#N/A	#N/A	#N/A
EPHA5	#N/A	#N/A	#N/A		#N/A	#N/A	#N/A
EPHA6	#N/A	#N/A	#N/A		#N/A	#N/A	#N/A
EPHA7	#N/A	#N/A	#N/A		#N/A	#N/A	#N/A
EPHA8	#N/A	#N/A	#N/A		#N/A	#N/A	#N/A
EPHB1	#N/A	#N/A	#N/A		#N/A	#N/A	#N/A
EPHB2	Ephb2	Ephb2	Ephb2		#N/A	#N/A	#N/A
EPHB3	Ephb3	Ephb3	Ephb3		#N/A	#N/A	#N/A
EPHB4	#N/A	#N/A	#N/A		#N/A	#N/A	#N/A
EPHB6	#N/A	#N/A	#N/A		#N/A	#N/A	#N/A
EPOR	#N/A	#N/A	#N/A		#N/A	#N/A	#N/A
EPSTI1	Epsti1	Epsti1	Epsti1		#N/A	#N/A	#N/A
EQTN	#N/A	#N/A	#N/A		#N/A	#N/A	#N/A
ERBB2	#N/A	#N/A	#N/A		#N/A	#N/A	#N/A
ERBB3	#N/A	#N/A	#N/A		#N/A	#N/A	#N/A
ERBB4	#N/A	#N/A	#N/A		Erbb4	Erbb4	Erbb4
EREG	#N/A	#N/A	#N/A		#N/A	#N/A	#N/A
ERG28	#N/A	#N/A	#N/A		#N/A	#N/A	#N/A
ERGIC1	#N/A	#N/A	#N/A		#N/A	#N/A	#N/A
ERGIC2	#N/A	#N/A	#N/A		#N/A	#N/A	#N/A
ERGIC3	#N/A	#N/A	#N/A		#N/A	#N/A	#N/A
ERMAP	#N/A	#N/A	#N/A		#N/A	#N/A	#N/A
ERMARD	#N/A	#N/A	#N/A		#N/A	#N/A	#N/A
ERMP1	Ermp1	#N/A	#N/A		#N/A	#N/A	#N/A
ERN1	#N/A	#N/A	#N/A		#N/A	Ern1	Ern1
ERN2	Ern2	Ern2	Ern2		#N/A	#N/A	#N/A
ERVFRD-1	#N/A	#N/A	#N/A		#N/A	#N/A	#N/A
ERVMER34-1	#N/A	#N/A	#N/A		#N/A	#N/A	#N/A
ERVV-1	#N/A	#N/A	#N/A		#N/A	#N/A	#N/A
ERVV-2	#N/A	#N/A	#N/A		#N/A	#N/A	#N/A
ERVW-1	#N/A	#N/A	#N/A		#N/A	#N/A	#N/A
ESAM	#N/A	#N/A	#N/A		#N/A	#N/A	#N/A
ESPL1	Espl1	Espl1	Espl1		#N/A	#N/A	#N/A
ESYT1	#N/A	#N/A	#N/A		#N/A	#N/A	#N/A
ESYT2	#N/A	#N/A	#N/A		#N/A	#N/A	#N/A
ESYT3	#N/A	#N/A	#N/A		#N/A	Esyt3	Esyt3
ETFDH	#N/A	#N/A	#N/A		#N/A	#N/A	#N/A
ETNK1	#N/A	#N/A	#N/A		#N/A	#N/A	#N/A
EVA1A	Eva1a	Eva1a	#N/A		#N/A	#N/A	#N/A
EVA1C	#N/A	#N/A	#N/A		#N/A	#N/A	#N/A
EVC	#N/A	#N/A	#N/A		#N/A	#N/A	#N/A
EVC2	#N/A	#N/A	#N/A		#N/A	#N/A	#N/A
EVI2A	#N/A	#N/A	Evi2a		#N/A	#N/A	#N/A
EVI2B	#N/A	#N/A	#N/A		#N/A	#N/A	#N/A
EVI5	#N/A	#N/A	#N/A		#N/A	#N/A	#N/A
EVI5L	#N/A	#N/A	#N/A		#N/A	#N/A	#N/A
EXD2	#N/A	#N/A	#N/A		#N/A	#N/A	#N/A
EXT1	#N/A	#N/A	#N/A		#N/A	#N/A	#N/A
EXT2	#N/A	#N/A	#N/A		#N/A	#N/A	#N/A
EXTL3	#N/A	#N/A	#N/A		#N/A	#N/A	#N/A
F11R	#N/A	#N/A	#N/A		#N/A	#N/A	#N/A
F2R	#N/A	#N/A	#N/A		#N/A	#N/A	#N/A
F2RL1	F2rl1	F2rl1	F2rl1		#N/A	#N/A	#N/A
F2RL2	#N/A	#N/A	#N/A		#N/A	#N/A	#N/A
F2RL3	#N/A	#N/A	#N/A		#N/A	#N/A	#N/A
F3	F3	F3	F3		#N/A	#N/A	#N/A
FA2H	Fa2h	Fa2h	Fa2h		#N/A	#N/A	#N/A
FAAH	#N/A	#N/A	#N/A		#N/A	#N/A	#N/A
FADS1	#N/A	#N/A	#N/A		#N/A	#N/A	#N/A
FADS2	#N/A	#N/A	#N/A		#N/A	#N/A	#N/A
FADS3	#N/A	#N/A	#N/A		#N/A	#N/A	#N/A
FADS6	#N/A	#N/A	#N/A		#N/A	#N/A	#N/A
FAF2	#N/A	#N/A	#N/A		#N/A	#N/A	#N/A
FAIM2	#N/A	#N/A	#N/A		Faim2	Faim2	Faim2
FAM105A	#N/A	#N/A	#N/A		#N/A	#N/A	#N/A
FAM122C	#N/A	#N/A	#N/A		#N/A	#N/A	#N/A
FAM155A	#N/A	#N/A	#N/A		#N/A	#N/A	#N/A
FAM155B	#N/A	#N/A	#N/A		#N/A	#N/A	#N/A
FAM160A2	#N/A	#N/A	#N/A		#N/A	#N/A	#N/A
FAM162A	#N/A	#N/A	#N/A		#N/A	#N/A	#N/A
FAM162B	#N/A	#N/A	#N/A		#N/A	#N/A	#N/A
FAM163A	#N/A	#N/A	#N/A		#N/A	#N/A	#N/A
FAM163B	#N/A	#N/A	#N/A		#N/A	#N/A	#N/A
FAM171A1	#N/A	#N/A	#N/A		#N/A	#N/A	#N/A
FAM171A2	#N/A	#N/A	#N/A		#N/A	#N/A	#N/A
FAM171B	#N/A	#N/A	#N/A		Fam171b	Fam171b	#N/A
FAM173A	#N/A	#N/A	#N/A		#N/A	#N/A	#N/A
FAM173B	#N/A	#N/A	#N/A		#N/A	#N/A	#N/A
FAM174A	#N/A	#N/A	#N/A		#N/A	#N/A	#N/A
FAM174B	#N/A	#N/A	#N/A		#N/A	Fam174b	Fam174b
FAM187A	#N/A	#N/A	#N/A		#N/A	#N/A	#N/A
FAM187B	#N/A	#N/A	#N/A		#N/A	Fam187b	Fam187b
FAM189A1	#N/A	#N/A	#N/A		Fam189a1	Fam189a1	Fam189a1
FAM189A2	#N/A	#N/A	#N/A		#N/A	#N/A	#N/A
FAM189B	#N/A	#N/A	#N/A		#N/A	#N/A	#N/A
FAM198B	#N/A	#N/A	#N/A		#N/A	#N/A	#N/A
FAM205A	#N/A	#N/A	#N/A		#N/A	#N/A	#N/A
FAM205C	#N/A	#N/A	#N/A		#N/A	#N/A	#N/A
FAM209A	#N/A	#N/A	#N/A		#N/A	#N/A	#N/A
FAM209B	#N/A	#N/A	#N/A		#N/A	#N/A	#N/A
FAM210A	#N/A	#N/A	#N/A		Fam210a	Fam210a	Fam210a
FAM210B	#N/A	#N/A	#N/A		#N/A	#N/A	Fam210b
FAM213A	#N/A	#N/A	#N/A		#N/A	#N/A	#N/A
FAM220A	#N/A	#N/A	#N/A		#N/A	#N/A	#N/A
FAM234A	#N/A	#N/A	#N/A		#N/A	#N/A	#N/A
FAM234B	#N/A	#N/A	#N/A		#N/A	#N/A	#N/A
FAM241A	#N/A	#N/A	#N/A		#N/A	#N/A	#N/A
FAM241B	#N/A	#N/A	#N/A		#N/A	#N/A	#N/A
FAM35A	#N/A	#N/A	#N/A		#N/A	#N/A	#N/A
FAM3A	#N/A	#N/A	#N/A		#N/A	#N/A	#N/A
FAM3B	Fam3b	Fam3b	#N/A		#N/A	#N/A	#N/A
FAM3D	#N/A	#N/A	#N/A		#N/A	#N/A	#N/A
FAM57A	Fam57a	Fam57a	Fam57a		#N/A	#N/A	#N/A
FAM57B	#N/A	#N/A	#N/A		#N/A	#N/A	#N/A
FAM69A	#N/A	#N/A	#N/A		#N/A	#N/A	#N/A
FAM69B	#N/A	#N/A	#N/A		#N/A	#N/A	#N/A
FAM76B	#N/A	#N/A	#N/A		#N/A	#N/A	#N/A
FAM8A1	#N/A	#N/A	#N/A		#N/A	#N/A	#N/A
FAM98B	#N/A	#N/A	#N/A		#N/A	#N/A	#N/A
FAM9C	#N/A	#N/A	#N/A		#N/A	#N/A	#N/A
FANCA	Fanca	Fanca	Fanca		#N/A	#N/A	#N/A
FAR1	#N/A	#N/A	#N/A		#N/A	#N/A	#N/A
FAR2	#N/A	#N/A	#N/A		#N/A	#N/A	#N/A
FAS	#N/A	#N/A	#N/A		#N/A	#N/A	Fas
FASLG	#N/A	#N/A	#N/A		#N/A	#N/A	#N/A
FAT1	#N/A	#N/A	#N/A		#N/A	#N/A	#N/A
FAT2	#N/A	#N/A	#N/A		#N/A	#N/A	#N/A
FAT3	#N/A	#N/A	#N/A		#N/A	#N/A	Fat3
FAT4	#N/A	#N/A	#N/A		#N/A	#N/A	#N/A
FATE1	#N/A	#N/A	#N/A		#N/A	#N/A	#N/A
FAXDC2	#N/A	#N/A	#N/A		#N/A	#N/A	#N/A
FBXL17	#N/A	#N/A	#N/A		#N/A	#N/A	#N/A
FBXO18	#N/A	#N/A	#N/A		#N/A	#N/A	#N/A
FBXO31	#N/A	#N/A	#N/A		#N/A	Fbxo31	Fbxo31
FBXW12	#N/A	#N/A	#N/A		#N/A	#N/A	#N/A
FCAMR	#N/A	#N/A	#N/A		#N/A	#N/A	Fcamr
FCAR	#N/A	#N/A	#N/A		#N/A	#N/A	#N/A
FCER1A	#N/A	#N/A	#N/A		#N/A	#N/A	#N/A
FCER1G	#N/A	Fcer1g	Fcer1g		#N/A	#N/A	#N/A
FCER2	#N/A	#N/A	#N/A		#N/A	#N/A	#N/A
FCGR1A	#N/A	#N/A	#N/A		#N/A	#N/A	#N/A
FCGR1B	#N/A	#N/A	#N/A		#N/A	#N/A	#N/A
FCGR2A	#N/A	#N/A	#N/A		#N/A	#N/A	#N/A
FCGR2B	#N/A	#N/A	Fcgr2b		#N/A	#N/A	#N/A
FCGR3A	#N/A	#N/A	#N/A		#N/A	#N/A	#N/A
FCGR3B	#N/A	#N/A	#N/A		#N/A	#N/A	#N/A
FCGRT	#N/A	#N/A	#N/A		#N/A	#N/A	#N/A
FCMR	#N/A	#N/A	#N/A		#N/A	#N/A	#N/A
FCN1	#N/A	#N/A	#N/A		#N/A	#N/A	#N/A
FCRL1	#N/A	#N/A	#N/A		#N/A	#N/A	#N/A
FCRL2	#N/A	#N/A	#N/A		#N/A	#N/A	#N/A
FCRL3	#N/A	#N/A	#N/A		#N/A	#N/A	#N/A
FCRL4	#N/A	#N/A	#N/A		#N/A	#N/A	#N/A
FCRL5	#N/A	#N/A	#N/A		#N/A	#N/A	#N/A
FCRL6	#N/A	#N/A	#N/A		#N/A	#N/A	#N/A
FCRLA	#N/A	#N/A	#N/A		#N/A	#N/A	#N/A
FDFT1	#N/A	#N/A	#N/A		#N/A	#N/A	#N/A
FER1L5	#N/A	#N/A	#N/A		#N/A	#N/A	#N/A
FER1L6	#N/A	#N/A	#N/A		#N/A	#N/A	#N/A
FFAR1	#N/A	#N/A	#N/A		#N/A	#N/A	#N/A
FFAR2	#N/A	Ffar2	#N/A		#N/A	#N/A	#N/A
FFAR3	#N/A	#N/A	#N/A		#N/A	#N/A	#N/A
FFAR4	Ffar4	Ffar4	Ffar4		#N/A	#N/A	#N/A
FGFR1	#N/A	#N/A	#N/A		#N/A	#N/A	#N/A
FGFR2	#N/A	#N/A	#N/A		#N/A	#N/A	#N/A
FGFR3	Fgfr3	#N/A	#N/A		#N/A	#N/A	#N/A
FGFR4	#N/A	#N/A	#N/A		#N/A	#N/A	#N/A
FGFRL1	#N/A	#N/A	#N/A		#N/A	#N/A	#N/A
FIG4	#N/A	#N/A	#N/A		#N/A	#N/A	#N/A
FIS1	#N/A	#N/A	#N/A		#N/A	#N/A	#N/A
FITM1	#N/A	#N/A	#N/A		#N/A	#N/A	#N/A
FITM2	#N/A	#N/A	#N/A		#N/A	#N/A	#N/A
FKBP11	#N/A	#N/A	#N/A		Fkbp11	Fkbp11	Fkbp11
FKBP1A	#N/A	#N/A	#N/A		#N/A	#N/A	#N/A
FKBP8	#N/A	#N/A	#N/A		#N/A	#N/A	#N/A
FKRP	#N/A	#N/A	#N/A		#N/A	#N/A	#N/A
FLRT1	#N/A	#N/A	#N/A		Flrt1	Flrt1	Flrt1
FLRT2	#N/A	#N/A	#N/A		Flrt2	#N/A	#N/A
FLRT3	#N/A	#N/A	#N/A		#N/A	#N/A	#N/A
FLT1	#N/A	#N/A	#N/A		#N/A	#N/A	#N/A
FLT3	#N/A	#N/A	#N/A		#N/A	#N/A	#N/A
FLT3LG	#N/A	#N/A	#N/A		#N/A	#N/A	#N/A
FLT4	#N/A	#N/A	#N/A		#N/A	#N/A	#N/A
FLVCR1	#N/A	#N/A	#N/A		#N/A	#N/A	#N/A
FLVCR2	#N/A	#N/A	#N/A		#N/A	#N/A	#N/A
FMNL1	#N/A	Fmnl1	Fmnl1		#N/A	#N/A	#N/A
FMO1	#N/A	#N/A	#N/A		Fmo1	#N/A	#N/A
FMO2	#N/A	#N/A	#N/A		#N/A	Fmo2	Fmo2
FMO3	Fmo3	#N/A	#N/A		#N/A	#N/A	#N/A
FMO4	#N/A	Fmo4	#N/A		#N/A	#N/A	#N/A
FMO5	#N/A	#N/A	#N/A		#N/A	#N/A	#N/A
FMR1NB	#N/A	#N/A	#N/A		#N/A	#N/A	#N/A
FNDC10	#N/A	#N/A	#N/A		#N/A	#N/A	#N/A
FNDC3A	#N/A	#N/A	#N/A		#N/A	#N/A	#N/A
FNDC3B	#N/A	#N/A	#N/A		#N/A	#N/A	#N/A
FNDC4	#N/A	#N/A	#N/A		#N/A	#N/A	#N/A
FNDC5	#N/A	#N/A	#N/A		#N/A	Fndc5	Fndc5
FNDC9	#N/A	#N/A	#N/A		#N/A	#N/A	#N/A
FO681492.1	#N/A	#N/A	#N/A		#N/A	#N/A	#N/A
FOCAD	#N/A	#N/A	#N/A		#N/A	#N/A	#N/A
FOLH1	#N/A	#N/A	#N/A		#N/A	#N/A	#N/A
FOLR1	Folr1	Folr1	#N/A		#N/A	#N/A	#N/A
FOLR2	#N/A	#N/A	#N/A		Folr2	#N/A	#N/A
FP565260.3	#N/A	#N/A	#N/A		#N/A	#N/A	#N/A
FPR1	#N/A	#N/A	#N/A		#N/A	#N/A	#N/A
FPR2	#N/A	#N/A	Fpr2		#N/A	#N/A	#N/A
FPR3	#N/A	#N/A	#N/A		#N/A	#N/A	#N/A
FRAS1	#N/A	#N/A	#N/A		#N/A	#N/A	#N/A
FREM2	#N/A	#N/A	#N/A		#N/A	#N/A	#N/A
FRMD3	#N/A	#N/A	#N/A		#N/A	#N/A	#N/A
FRMD5	#N/A	#N/A	#N/A		#N/A	#N/A	#N/A
FRRS1	Frrs1	Frrs1	Frrs1		#N/A	#N/A	#N/A
FRRS1L	#N/A	#N/A	#N/A		#N/A	#N/A	#N/A
FSD1L	#N/A	#N/A	#N/A		#N/A	#N/A	#N/A
FSHR	#N/A	#N/A	#N/A		#N/A	#N/A	#N/A
FURIN	#N/A	#N/A	#N/A		#N/A	#N/A	#N/A
FUT1	#N/A	#N/A	#N/A		Fut1	Fut1	Fut1
FUT2	#N/A	#N/A	#N/A		#N/A	#N/A	Fut2
FUT3	#N/A	#N/A	#N/A		#N/A	#N/A	#N/A
FUT4	Fut4	Fut4	#N/A		#N/A	#N/A	#N/A
FUT5	#N/A	#N/A	#N/A		#N/A	#N/A	#N/A
FUT6	#N/A	#N/A	#N/A		#N/A	#N/A	#N/A
FUT8	#N/A	#N/A	#N/A		#N/A	#N/A	#N/A
FUT9	#N/A	#N/A	#N/A		#N/A	#N/A	Fut9
FUZ	#N/A	#N/A	#N/A		#N/A	#N/A	#N/A
FXYD1	#N/A	#N/A	#N/A		#N/A	#N/A	#N/A
FXYD2	#N/A	#N/A	#N/A		#N/A	#N/A	#N/A
FXYD3	#N/A	#N/A	#N/A		#N/A	#N/A	#N/A
FXYD4	#N/A	Fxyd4	#N/A		#N/A	#N/A	#N/A
FXYD5	#N/A	#N/A	#N/A		#N/A	#N/A	#N/A
FXYD6	#N/A	#N/A	#N/A		#N/A	#N/A	#N/A
FXYD6-FXYD2	#N/A	#N/A	#N/A		#N/A	#N/A	#N/A
FXYD7	#N/A	#N/A	#N/A		#N/A	#N/A	#N/A
FZD1	#N/A	#N/A	#N/A		#N/A	#N/A	#N/A
FZD10	#N/A	#N/A	#N/A		#N/A	Fzd10	Fzd10
FZD2	#N/A	#N/A	#N/A		#N/A	#N/A	#N/A
FZD3	#N/A	#N/A	#N/A		#N/A	#N/A	#N/A
FZD4	#N/A	#N/A	#N/A		#N/A	#N/A	#N/A
FZD5	#N/A	#N/A	#N/A		#N/A	#N/A	#N/A
FZD6	#N/A	#N/A	#N/A		#N/A	#N/A	#N/A
FZD7	#N/A	#N/A	#N/A		#N/A	#N/A	#N/A
FZD8	#N/A	#N/A	#N/A		#N/A	#N/A	#N/A
FZD9	#N/A	#N/A	#N/A		#N/A	#N/A	#N/A
G6PC	#N/A	#N/A	#N/A		#N/A	#N/A	#N/A
G6PC2	#N/A	#N/A	#N/A		G6pc2	G6pc2	G6pc2
G6PC3	#N/A	#N/A	#N/A		#N/A	#N/A	#N/A
GABBR1	#N/A	#N/A	Gabbr1		#N/A	#N/A	#N/A
GABBR2	#N/A	#N/A	#N/A		#N/A	#N/A	#N/A
GABRA1	#N/A	#N/A	#N/A		#N/A	#N/A	#N/A
GABRA2	#N/A	#N/A	#N/A		#N/A	#N/A	#N/A
GABRA3	#N/A	#N/A	#N/A		#N/A	#N/A	#N/A
GABRA4	#N/A	#N/A	#N/A		Gabra4	Gabra4	Gabra4
GABRA5	#N/A	#N/A	#N/A		#N/A	#N/A	Gabra5
GABRA6	#N/A	#N/A	#N/A		#N/A	#N/A	#N/A
GABRB1	#N/A	#N/A	#N/A		#N/A	#N/A	#N/A
GABRB2	#N/A	#N/A	#N/A		#N/A	#N/A	#N/A
GABRB3	#N/A	#N/A	#N/A		#N/A	#N/A	#N/A
GABRD	#N/A	#N/A	#N/A		#N/A	#N/A	#N/A
GABRE	Gabre	Gabre	Gabre		#N/A	#N/A	#N/A
GABRG1	#N/A	#N/A	#N/A		#N/A	#N/A	#N/A
GABRG2	#N/A	#N/A	#N/A		#N/A	#N/A	#N/A
GABRG3	#N/A	#N/A	#N/A		#N/A	#N/A	#N/A
GABRP	Gabrp	Gabrp	Gabrp		#N/A	#N/A	#N/A
GABRQ	#N/A	#N/A	#N/A		#N/A	#N/A	#N/A
GABRR1	#N/A	#N/A	#N/A		#N/A	#N/A	#N/A
GABRR2	#N/A	#N/A	#N/A		#N/A	#N/A	#N/A
GABRR3	#N/A	#N/A	#N/A		#N/A	#N/A	#N/A
GAL3ST4	#N/A	#N/A	#N/A		#N/A	#N/A	#N/A
GALC	#N/A	#N/A	#N/A		#N/A	#N/A	#N/A
GALNT1	#N/A	#N/A	#N/A		#N/A	#N/A	#N/A
GALNT11	#N/A	#N/A	#N/A		#N/A	#N/A	#N/A
GALNT14	Galnt14	Galnt14	#N/A		#N/A	#N/A	#N/A
GALNT18	#N/A	#N/A	#N/A		Galnt18	Galnt18	Galnt18
GALNT3	#N/A	#N/A	#N/A		#N/A	#N/A	#N/A
GALNT8	#N/A	#N/A	#N/A		#N/A	#N/A	#N/A
GALNT9	#N/A	#N/A	#N/A		Galnt9	Galnt9	Galnt9
GALNTL5	#N/A	#N/A	#N/A		#N/A	#N/A	#N/A
GALR1	#N/A	#N/A	#N/A		#N/A	#N/A	#N/A
GALR2	#N/A	#N/A	#N/A		#N/A	#N/A	#N/A
GALR3	#N/A	#N/A	#N/A		#N/A	#N/A	#N/A
GCGR	#N/A	#N/A	#N/A		#N/A	#N/A	#N/A
GCNT2	#N/A	#N/A	#N/A		#N/A	#N/A	#N/A
GCNT3	Gcnt3	Gcnt3	Gcnt3		#N/A	#N/A	#N/A
GCSAML-AS1	#N/A	#N/A	#N/A		#N/A	#N/A	#N/A
GDAP1	#N/A	#N/A	#N/A		#N/A	#N/A	#N/A
GDAP1L1	#N/A	#N/A	#N/A		#N/A	#N/A	#N/A
GDE1	Gde1	Gde1	Gde1		#N/A	#N/A	#N/A
GDPD1	#N/A	#N/A	#N/A		#N/A	#N/A	#N/A
GDPD2	#N/A	#N/A	#N/A		#N/A	#N/A	#N/A
GDPD3	#N/A	#N/A	#N/A		#N/A	#N/A	#N/A
GDPD4	#N/A	#N/A	#N/A		#N/A	#N/A	#N/A
GDPD5	Gdpd5	#N/A	#N/A		#N/A	#N/A	#N/A
GFPT1	#N/A	#N/A	#N/A		#N/A	#N/A	#N/A
GFPT2	#N/A	#N/A	#N/A		#N/A	#N/A	#N/A
GFRA1	Gfra1	#N/A	#N/A		#N/A	#N/A	#N/A
GFRA3	#N/A	#N/A	#N/A		Gfra3	Gfra3	Gfra3
GFRAL	#N/A	#N/A	#N/A		#N/A	#N/A	#N/A
GFY	#N/A	#N/A	#N/A		#N/A	#N/A	#N/A
GGCX	#N/A	#N/A	#N/A		#N/A	#N/A	#N/A
GGT1	#N/A	#N/A	#N/A		Ggt1	Ggt1	Ggt1
GGT2	#N/A	#N/A	#N/A		#N/A	#N/A	#N/A
GGT6	#N/A	Ggt6	Ggt6		#N/A	#N/A	#N/A
GGT7	#N/A	#N/A	#N/A		#N/A	#N/A	#N/A
GHITM	#N/A	#N/A	#N/A		#N/A	#N/A	#N/A
GHR	#N/A	#N/A	#N/A		#N/A	#N/A	#N/A
GHRHR	#N/A	#N/A	#N/A		#N/A	#N/A	#N/A
GHSR	#N/A	#N/A	#N/A		#N/A	#N/A	#N/A
GIMAP1	#N/A	#N/A	#N/A		#N/A	#N/A	#N/A
GIMAP1-GIMAP5	#N/A	#N/A	#N/A		#N/A	#N/A	#N/A
GIMAP2	#N/A	#N/A	#N/A		#N/A	#N/A	#N/A
GIMAP5	#N/A	#N/A	#N/A		#N/A	#N/A	#N/A
GINM1	#N/A	#N/A	#N/A		#N/A	#N/A	#N/A
GIPR	#N/A	#N/A	#N/A		#N/A	#N/A	#N/A
GJA1	#N/A	#N/A	#N/A		#N/A	#N/A	#N/A
GJA10	#N/A	#N/A	#N/A		#N/A	#N/A	#N/A
GJA3	#N/A	#N/A	#N/A		#N/A	#N/A	#N/A
GJA4	#N/A	#N/A	#N/A		#N/A	#N/A	#N/A
GJA5	#N/A	#N/A	#N/A		#N/A	#N/A	#N/A
GJA8	#N/A	#N/A	#N/A		#N/A	#N/A	#N/A
GJA9	#N/A	#N/A	#N/A		#N/A	#N/A	#N/A
GJB1	#N/A	#N/A	#N/A		#N/A	#N/A	#N/A
GJB2	Gjb2	#N/A	#N/A		#N/A	#N/A	#N/A
GJB3	#N/A	#N/A	#N/A		#N/A	#N/A	#N/A
GJB4	Gjb4	Gjb4	Gjb4		#N/A	#N/A	#N/A
GJB5	#N/A	#N/A	#N/A		#N/A	#N/A	#N/A
GJB6	#N/A	#N/A	#N/A		#N/A	#N/A	#N/A
GJB7	#N/A	#N/A	#N/A		#N/A	#N/A	#N/A
GJC1	#N/A	#N/A	#N/A		Gjc1	#N/A	#N/A
GJC2	#N/A	#N/A	#N/A		Gjc2	#N/A	#N/A
GJC3	#N/A	#N/A	#N/A		#N/A	#N/A	Gjc3
GJD2	#N/A	#N/A	#N/A		#N/A	#N/A	#N/A
GJD3	#N/A	#N/A	#N/A		#N/A	#N/A	#N/A
GJD4	#N/A	#N/A	#N/A		#N/A	#N/A	#N/A
GJE1	#N/A	#N/A	#N/A		#N/A	#N/A	#N/A
GK	#N/A	#N/A	#N/A		#N/A	#N/A	#N/A
GK2	#N/A	#N/A	#N/A		#N/A	#N/A	#N/A
GK3P	#N/A	#N/A	#N/A		#N/A	#N/A	#N/A
GLCCI1	#N/A	#N/A	#N/A		#N/A	#N/A	#N/A
GLG1	#N/A	#N/A	#N/A		#N/A	#N/A	#N/A
GLIPR1	#N/A	#N/A	#N/A		#N/A	#N/A	#N/A
GLIPR1L2	#N/A	#N/A	#N/A		#N/A	#N/A	#N/A
GLMP	#N/A	#N/A	#N/A		#N/A	#N/A	#N/A
GLP1R	#N/A	#N/A	#N/A		#N/A	#N/A	#N/A
GLP2R	#N/A	#N/A	#N/A		#N/A	#N/A	#N/A
GLRA1	#N/A	#N/A	#N/A		#N/A	#N/A	#N/A
GLRA2	#N/A	#N/A	#N/A		#N/A	#N/A	#N/A
GLRA3	#N/A	#N/A	#N/A		#N/A	#N/A	#N/A
GLRA4	#N/A	#N/A	#N/A		#N/A	#N/A	#N/A
GLRB	#N/A	#N/A	#N/A		Glrb	#N/A	#N/A
GLT8D1	#N/A	#N/A	#N/A		#N/A	#N/A	#N/A
GNE	#N/A	#N/A	#N/A		#N/A	#N/A	#N/A
GNPTAB	#N/A	#N/A	#N/A		#N/A	#N/A	#N/A
GNRHR	#N/A	#N/A	#N/A		#N/A	#N/A	#N/A
GOLGA5	#N/A	#N/A	#N/A		#N/A	#N/A	#N/A
GOLGB1	#N/A	#N/A	#N/A		#N/A	#N/A	#N/A
GOLIM4	#N/A	#N/A	#N/A		#N/A	#N/A	#N/A
GOLT1A	#N/A	Golt1a	#N/A		#N/A	#N/A	#N/A
GOLT1B	#N/A	#N/A	#N/A		#N/A	#N/A	#N/A
GOSR1	#N/A	#N/A	#N/A		#N/A	#N/A	#N/A
GOSR2	#N/A	#N/A	#N/A		#N/A	#N/A	#N/A
GP1BA	#N/A	#N/A	#N/A		#N/A	#N/A	#N/A
GP1BB	#N/A	#N/A	Gp1bb		#N/A	#N/A	#N/A
GP2	Gp2	Gp2	Gp2		#N/A	#N/A	#N/A
GP5	#N/A	#N/A	#N/A		#N/A	#N/A	#N/A
GP6	#N/A	#N/A	#N/A		#N/A	#N/A	#N/A
GP9	#N/A	#N/A	#N/A		#N/A	#N/A	#N/A
GPA33	Gpa33	Gpa33	Gpa33		#N/A	#N/A	#N/A
GPAA1	#N/A	#N/A	#N/A		#N/A	#N/A	#N/A
GPAM	#N/A	#N/A	#N/A		#N/A	#N/A	Gpam
GPAT2	#N/A	#N/A	#N/A		#N/A	#N/A	#N/A
GPAT3	#N/A	#N/A	#N/A		#N/A	#N/A	#N/A
GPAT4	#N/A	#N/A	#N/A		#N/A	#N/A	#N/A
GPBAR1	#N/A	#N/A	#N/A		#N/A	#N/A	#N/A
GPC1	#N/A	#N/A	#N/A		#N/A	#N/A	#N/A
GPC3	#N/A	#N/A	#N/A		Gpc3	#N/A	#N/A
GPC4	#N/A	#N/A	#N/A		#N/A	#N/A	#N/A
GPER1	#N/A	#N/A	#N/A		#N/A	#N/A	#N/A
GPI	#N/A	#N/A	#N/A		#N/A	#N/A	#N/A
GPM6A	#N/A	#N/A	#N/A		#N/A	#N/A	#N/A
GPM6B	#N/A	#N/A	#N/A		#N/A	#N/A	#N/A
GPNMB	#N/A	#N/A	#N/A		#N/A	#N/A	#N/A
GPR1	#N/A	#N/A	#N/A		#N/A	#N/A	#N/A
GPR101	#N/A	#N/A	#N/A		#N/A	#N/A	#N/A
GPR107	#N/A	#N/A	#N/A		#N/A	#N/A	#N/A
GPR108	#N/A	#N/A	#N/A		#N/A	#N/A	#N/A
GPR119	#N/A	#N/A	#N/A		#N/A	#N/A	#N/A
GPR12	#N/A	#N/A	#N/A		#N/A	#N/A	#N/A
GPR132	#N/A	#N/A	#N/A		#N/A	#N/A	#N/A
GPR135	#N/A	#N/A	#N/A		#N/A	#N/A	#N/A
GPR137	#N/A	#N/A	#N/A		#N/A	#N/A	#N/A
GPR137B	#N/A	#N/A	Gpr137b		#N/A	#N/A	#N/A
GPR137C	#N/A	#N/A	Gpr137c		#N/A	#N/A	#N/A
GPR139	#N/A	#N/A	#N/A		#N/A	#N/A	#N/A
GPR141	#N/A	Gpr141	Gpr141		#N/A	#N/A	#N/A
GPR142	#N/A	#N/A	#N/A		#N/A	#N/A	#N/A
GPR143	#N/A	#N/A	#N/A		#N/A	#N/A	#N/A
GPR146	#N/A	#N/A	#N/A		#N/A	#N/A	#N/A
GPR148	#N/A	#N/A	#N/A		#N/A	#N/A	#N/A
GPR149	#N/A	#N/A	#N/A		#N/A	#N/A	#N/A
GPR15	#N/A	#N/A	#N/A		#N/A	#N/A	#N/A
GPR150	#N/A	#N/A	#N/A		#N/A	#N/A	#N/A
GPR151	#N/A	#N/A	#N/A		#N/A	#N/A	#N/A
GPR152	#N/A	#N/A	#N/A		#N/A	#N/A	#N/A
GPR153	#N/A	#N/A	#N/A		#N/A	#N/A	#N/A
GPR155	#N/A	#N/A	#N/A		#N/A	#N/A	Gpr155
GPR156	#N/A	#N/A	#N/A		#N/A	#N/A	#N/A
GPR157	#N/A	#N/A	#N/A		#N/A	#N/A	#N/A
GPR158	#N/A	#N/A	#N/A		#N/A	#N/A	#N/A
GPR160	#N/A	#N/A	#N/A		#N/A	#N/A	#N/A
GPR161	#N/A	#N/A	#N/A		#N/A	#N/A	#N/A
GPR162	#N/A	#N/A	#N/A		#N/A	#N/A	#N/A
GPR17	#N/A	#N/A	#N/A		#N/A	#N/A	#N/A
GPR171	#N/A	Gpr171	Gpr171		#N/A	#N/A	#N/A
GPR173	#N/A	#N/A	#N/A		#N/A	#N/A	#N/A
GPR174	#N/A	#N/A	#N/A		#N/A	#N/A	#N/A
GPR176	#N/A	Gpr176	Gpr176		#N/A	#N/A	#N/A
GPR179	#N/A	#N/A	#N/A		#N/A	#N/A	#N/A
GPR18	#N/A	Gpr18	#N/A		#N/A	#N/A	#N/A
GPR180	#N/A	#N/A	#N/A		#N/A	#N/A	#N/A
GPR182	#N/A	#N/A	#N/A		#N/A	#N/A	#N/A
GPR183	#N/A	#N/A	#N/A		#N/A	#N/A	#N/A
GPR19	#N/A	#N/A	#N/A		#N/A	#N/A	#N/A
GPR20	#N/A	#N/A	Gpr20		#N/A	#N/A	#N/A
GPR21	#N/A	#N/A	#N/A		#N/A	#N/A	#N/A
GPR22	#N/A	#N/A	#N/A		#N/A	#N/A	#N/A
GPR25	#N/A	#N/A	Gpr25		#N/A	#N/A	#N/A
GPR26	#N/A	#N/A	#N/A		#N/A	#N/A	#N/A
GPR27	#N/A	#N/A	#N/A		#N/A	#N/A	#N/A
GPR3	#N/A	#N/A	#N/A		#N/A	#N/A	#N/A
GPR31	#N/A	#N/A	#N/A		#N/A	#N/A	#N/A
GPR32	#N/A	#N/A	#N/A		#N/A	#N/A	#N/A
GPR33	#N/A	#N/A	#N/A		#N/A	#N/A	#N/A
GPR34	#N/A	#N/A	#N/A		#N/A	#N/A	#N/A
GPR35	#N/A	Gpr35	Gpr35		#N/A	#N/A	#N/A
GPR37	#N/A	#N/A	#N/A		#N/A	#N/A	#N/A
GPR37L1	#N/A	#N/A	#N/A		Gpr37l1	Gpr37l1	Gpr37l1
GPR39	Gpr39	Gpr39	Gpr39		#N/A	#N/A	#N/A
GPR4	#N/A	#N/A	#N/A		#N/A	#N/A	#N/A
GPR42	#N/A	#N/A	#N/A		#N/A	#N/A	#N/A
GPR45	#N/A	#N/A	#N/A		#N/A	#N/A	#N/A
GPR50	#N/A	#N/A	#N/A		#N/A	#N/A	#N/A
GPR52	#N/A	#N/A	#N/A		#N/A	#N/A	#N/A
GPR55	#N/A	#N/A	#N/A		#N/A	#N/A	#N/A
GPR6	#N/A	#N/A	#N/A		#N/A	#N/A	#N/A
GPR61	#N/A	#N/A	#N/A		#N/A	#N/A	#N/A
GPR62	#N/A	#N/A	#N/A		Gpr62	Gpr62	#N/A
GPR63	#N/A	#N/A	#N/A		#N/A	#N/A	#N/A
GPR65	#N/A	Gpr65	Gpr65		#N/A	#N/A	#N/A
GPR68	#N/A	#N/A	#N/A		#N/A	#N/A	#N/A
GPR75	#N/A	#N/A	#N/A		#N/A	#N/A	#N/A
GPR78	#N/A	#N/A	#N/A		#N/A	#N/A	#N/A
GPR82	#N/A	#N/A	#N/A		#N/A	#N/A	#N/A
GPR83	#N/A	#N/A	#N/A		#N/A	#N/A	Gpr83
GPR84	#N/A	#N/A	#N/A		#N/A	#N/A	#N/A
GPR85	#N/A	#N/A	Gpr85		#N/A	#N/A	#N/A
GPR87	Gpr87	Gpr87	#N/A		#N/A	#N/A	#N/A
GPR88	#N/A	#N/A	#N/A		#N/A	#N/A	#N/A
GPR89A	#N/A	#N/A	#N/A		#N/A	#N/A	#N/A
GPR89B	#N/A	#N/A	#N/A		#N/A	#N/A	#N/A
GPRC5A	Gprc5a	Gprc5a	#N/A		#N/A	#N/A	#N/A
GPRC5B	#N/A	#N/A	#N/A		#N/A	#N/A	#N/A
GPRC5C	#N/A	#N/A	#N/A		#N/A	#N/A	#N/A
GPRC5D	#N/A	#N/A	#N/A		#N/A	#N/A	#N/A
GPRC6A	#N/A	#N/A	#N/A		#N/A	#N/A	#N/A
GPSM2	#N/A	Gpsm2	Gpsm2		#N/A	#N/A	#N/A
GRAMD1A	#N/A	#N/A	#N/A		#N/A	#N/A	#N/A
GRAMD1B	#N/A	#N/A	#N/A		#N/A	#N/A	#N/A
GRAMD1C	#N/A	#N/A	#N/A		#N/A	#N/A	#N/A
GRAMD2A	#N/A	#N/A	#N/A		#N/A	#N/A	#N/A
GRAMD2B	#N/A	#N/A	#N/A		#N/A	#N/A	#N/A
GRAMD4	#N/A	#N/A	#N/A		#N/A	#N/A	#N/A
GREB1	#N/A	#N/A	#N/A		Greb1	#N/A	Greb1
GRIA1	#N/A	#N/A	#N/A		Gria1	Gria1	Gria1
GRIA2	#N/A	#N/A	#N/A		#N/A	#N/A	#N/A
GRIA3	#N/A	#N/A	#N/A		#N/A	#N/A	#N/A
GRIA4	#N/A	#N/A	#N/A		#N/A	#N/A	#N/A
GRID1	#N/A	#N/A	#N/A		#N/A	#N/A	#N/A
GRID2	Grid2	#N/A	#N/A		#N/A	#N/A	#N/A
GRIK1	#N/A	#N/A	#N/A		#N/A	#N/A	#N/A
GRIK2	#N/A	#N/A	#N/A		#N/A	#N/A	#N/A
GRIK3	#N/A	#N/A	#N/A		#N/A	#N/A	#N/A
GRIK4	#N/A	#N/A	#N/A		#N/A	#N/A	#N/A
GRIK5	#N/A	#N/A	#N/A		#N/A	#N/A	#N/A
GRIN1	Grin1	#N/A	#N/A		#N/A	#N/A	#N/A
GRIN2A	#N/A	#N/A	#N/A		#N/A	#N/A	#N/A
GRIN2B	#N/A	#N/A	#N/A		#N/A	#N/A	#N/A
GRIN2C	#N/A	#N/A	#N/A		#N/A	#N/A	#N/A
GRIN2D	#N/A	#N/A	#N/A		#N/A	#N/A	#N/A
GRIN3A	#N/A	#N/A	#N/A		Grin3a	#N/A	#N/A
GRIN3B	#N/A	#N/A	#N/A		#N/A	#N/A	#N/A
GRINA	#N/A	#N/A	#N/A		#N/A	#N/A	#N/A
GRM1	#N/A	#N/A	#N/A		#N/A	#N/A	#N/A
GRM2	#N/A	#N/A	#N/A		#N/A	#N/A	#N/A
GRM3	#N/A	#N/A	#N/A		#N/A	#N/A	#N/A
GRM4	#N/A	#N/A	#N/A		#N/A	#N/A	#N/A
GRM5	#N/A	#N/A	#N/A		#N/A	#N/A	#N/A
GRM6	#N/A	#N/A	#N/A		#N/A	#N/A	#N/A
GRM7	#N/A	#N/A	#N/A		#N/A	#N/A	#N/A
GRM8	#N/A	#N/A	#N/A		#N/A	#N/A	#N/A
GRPR	#N/A	#N/A	#N/A		#N/A	#N/A	#N/A
GSG1	#N/A	#N/A	Gsg1		#N/A	#N/A	#N/A
GSG1L	#N/A	#N/A	#N/A		#N/A	#N/A	#N/A
GSG1L2	#N/A	#N/A	#N/A		#N/A	#N/A	#N/A
GSTCD	#N/A	#N/A	#N/A		#N/A	#N/A	#N/A
GTF3C1	#N/A	#N/A	#N/A		#N/A	#N/A	#N/A
GTF3C3	#N/A	#N/A	#N/A		#N/A	#N/A	#N/A
GUCY2C	#N/A	Gucy2c	Gucy2c		#N/A	#N/A	#N/A
GUCY2D	#N/A	#N/A	#N/A		#N/A	#N/A	#N/A
GUCY2F	#N/A	#N/A	#N/A		#N/A	#N/A	#N/A
GULP1	#N/A	#N/A	#N/A		#N/A	#N/A	#N/A
GYPA	#N/A	#N/A	#N/A		#N/A	#N/A	#N/A
GYPB	#N/A	#N/A	#N/A		#N/A	#N/A	#N/A
GYPC	#N/A	#N/A	#N/A		Gypc	#N/A	#N/A
GYPE	#N/A	#N/A	#N/A		#N/A	#N/A	#N/A
HACD1	#N/A	#N/A	#N/A		#N/A	#N/A	#N/A
HACD2	#N/A	#N/A	#N/A		#N/A	#N/A	#N/A
HACD3	#N/A	#N/A	#N/A		#N/A	#N/A	#N/A
HACD4	#N/A	#N/A	#N/A		#N/A	#N/A	#N/A
HAPLN3	#N/A	#N/A	#N/A		#N/A	#N/A	#N/A
HAS1	#N/A	#N/A	#N/A		#N/A	#N/A	#N/A
HAS2	#N/A	#N/A	#N/A		#N/A	#N/A	#N/A
HAS3	Has3	Has3	#N/A		#N/A	#N/A	#N/A
HAVCR1	#N/A	#N/A	#N/A		#N/A	#N/A	Havcr1
HAVCR2	#N/A	#N/A	#N/A		#N/A	#N/A	#N/A
HBD	#N/A	#N/A	#N/A		#N/A	#N/A	#N/A
HBEGF	Hbegf	#N/A	Hbegf		#N/A	#N/A	#N/A
HBS1L	#N/A	#N/A	#N/A		#N/A	#N/A	#N/A
HCAR1	#N/A	#N/A	#N/A		#N/A	#N/A	#N/A
HCAR2	#N/A	#N/A	#N/A		#N/A	#N/A	#N/A
HCAR3	#N/A	#N/A	#N/A		#N/A	#N/A	#N/A
HCN1	#N/A	Hcn1	#N/A		#N/A	#N/A	#N/A
HCN2	Hcn2	Hcn2	Hcn2		#N/A	#N/A	#N/A
HCN3	#N/A	#N/A	#N/A		#N/A	#N/A	#N/A
HCN4	#N/A	#N/A	#N/A		#N/A	#N/A	#N/A
HCRTR1	#N/A	#N/A	#N/A		#N/A	#N/A	#N/A
HCRTR2	#N/A	#N/A	#N/A		#N/A	#N/A	#N/A
HCST	#N/A	#N/A	#N/A		#N/A	#N/A	#N/A
HDAC10	#N/A	#N/A	#N/A		#N/A	#N/A	#N/A
HEATR5A	#N/A	#N/A	#N/A		#N/A	#N/A	#N/A
HECTD4	#N/A	#N/A	#N/A		#N/A	#N/A	#N/A
HEG1	#N/A	#N/A	#N/A		Heg1	#N/A	#N/A
HELZ	#N/A	#N/A	#N/A		#N/A	#N/A	#N/A
HEPACAM	#N/A	#N/A	#N/A		#N/A	#N/A	#N/A
HEPACAM2	#N/A	#N/A	#N/A		#N/A	#N/A	#N/A
HEPH	#N/A	Heph	Heph		#N/A	#N/A	#N/A
HEPHL1	#N/A	#N/A	#N/A		#N/A	#N/A	#N/A
HERC2	#N/A	#N/A	#N/A		#N/A	#N/A	#N/A
HERC4	#N/A	#N/A	#N/A		#N/A	#N/A	#N/A
HERC5	#N/A	#N/A	#N/A		#N/A	#N/A	#N/A
HERC6	Herc6	Herc6	Herc6		#N/A	#N/A	#N/A
HERPUD1	#N/A	#N/A	#N/A		Herpud1	Herpud1	Herpud1
HERPUD2	#N/A	#N/A	#N/A		#N/A	#N/A	#N/A
HFE	#N/A	#N/A	#N/A		#N/A	#N/A	#N/A
HFE2	#N/A	#N/A	#N/A		#N/A	#N/A	#N/A
HGSNAT	#N/A	#N/A	#N/A		#N/A	#N/A	#N/A
HHAT	#N/A	Hhat	Hhat		#N/A	#N/A	#N/A
HHATL	#N/A	#N/A	#N/A		#N/A	#N/A	#N/A
HHIP	#N/A	#N/A	#N/A		Hhip	Hhip	Hhip
HHLA2	#N/A	#N/A	#N/A		#N/A	#N/A	#N/A
HIGD1A	#N/A	#N/A	#N/A		#N/A	#N/A	#N/A
HIGD1B	#N/A	#N/A	#N/A		#N/A	#N/A	#N/A
HIGD1C	#N/A	#N/A	#N/A		#N/A	#N/A	#N/A
HIGD2A	#N/A	#N/A	#N/A		#N/A	#N/A	#N/A
HIGD2B	#N/A	#N/A	#N/A		#N/A	#N/A	#N/A
HILPDA	#N/A	#N/A	#N/A		#N/A	#N/A	#N/A
HIPK1	#N/A	#N/A	#N/A		#N/A	#N/A	#N/A
HIPK2	#N/A	#N/A	#N/A		#N/A	#N/A	#N/A
HIPK3	#N/A	#N/A	#N/A		#N/A	#N/A	#N/A
HLA-A	#N/A	#N/A	#N/A		#N/A	#N/A	#N/A
HLA-B	#N/A	#N/A	#N/A		#N/A	#N/A	#N/A
HLA-C	#N/A	#N/A	#N/A		#N/A	#N/A	#N/A
HLA-DMA	#N/A	#N/A	#N/A		#N/A	#N/A	#N/A
HLA-DMB	#N/A	#N/A	#N/A		#N/A	#N/A	#N/A
HLA-DOA	#N/A	#N/A	#N/A		#N/A	#N/A	#N/A
HLA-DOB	#N/A	#N/A	#N/A		#N/A	#N/A	#N/A
HLA-DPA1	#N/A	#N/A	#N/A		#N/A	#N/A	#N/A
HLA-DPB1	#N/A	#N/A	#N/A		#N/A	#N/A	#N/A
HLA-DQA1	#N/A	#N/A	#N/A		#N/A	#N/A	#N/A
HLA-DQA2	#N/A	#N/A	#N/A		#N/A	#N/A	#N/A
HLA-DQB1	#N/A	#N/A	#N/A		#N/A	#N/A	#N/A
HLA-DQB2	#N/A	#N/A	#N/A		#N/A	#N/A	#N/A
HLA-DRA	#N/A	#N/A	#N/A		#N/A	#N/A	#N/A
HLA-DRB1	#N/A	#N/A	#N/A		#N/A	#N/A	#N/A
HLA-DRB5	#N/A	#N/A	#N/A		#N/A	#N/A	#N/A
HLA-E	#N/A	#N/A	#N/A		#N/A	#N/A	#N/A
HLA-F	#N/A	#N/A	#N/A		#N/A	#N/A	#N/A
HLA-G	#N/A	#N/A	#N/A		#N/A	#N/A	#N/A
HM13	#N/A	#N/A	#N/A		#N/A	#N/A	#N/A
HMGCR	#N/A	Hmgcr	Hmgcr		#N/A	#N/A	#N/A
HMOX1	#N/A	Hmox1	Hmox1		#N/A	#N/A	#N/A
HMOX2	#N/A	#N/A	#N/A		#N/A	#N/A	#N/A
HOXC11	#N/A	#N/A	#N/A		#N/A	#N/A	#N/A
HPN	Hpn	#N/A	#N/A		#N/A	#N/A	#N/A
HPS3	#N/A	#N/A	#N/A		#N/A	#N/A	#N/A
HRASLS	#N/A	#N/A	#N/A		#N/A	#N/A	#N/A
HRASLS2	#N/A	#N/A	#N/A		#N/A	#N/A	#N/A
HRH1	#N/A	#N/A	#N/A		#N/A	#N/A	#N/A
HRH2	#N/A	#N/A	#N/A		#N/A	#N/A	#N/A
HRH3	#N/A	#N/A	#N/A		#N/A	#N/A	#N/A
HRH4	#N/A	#N/A	#N/A		#N/A	#N/A	#N/A
HRK	#N/A	#N/A	#N/A		#N/A	#N/A	#N/A
HS3ST4	#N/A	#N/A	#N/A		#N/A	#N/A	#N/A
HS6ST2	#N/A	#N/A	#N/A		#N/A	#N/A	#N/A
HSD11B1L	#N/A	#N/A	#N/A		#N/A	#N/A	#N/A
HSD11B2	Hsd11b2	Hsd11b2	Hsd11b2		#N/A	#N/A	#N/A
HSD17B12	#N/A	#N/A	#N/A		#N/A	#N/A	#N/A
HSD17B2	#N/A	Hsd17b2	Hsd17b2		#N/A	#N/A	#N/A
HSD17B3	#N/A	#N/A	#N/A		#N/A	#N/A	#N/A
HSD17B7	#N/A	#N/A	Hsd17b7		#N/A	#N/A	#N/A
HSD3B1	#N/A	#N/A	#N/A		#N/A	#N/A	#N/A
HSD3B2	#N/A	#N/A	#N/A		#N/A	#N/A	#N/A
HSD3B7	#N/A	#N/A	#N/A		#N/A	#N/A	#N/A
HSDL1	#N/A	#N/A	#N/A		#N/A	#N/A	#N/A
HTATIP2	#N/A	#N/A	#N/A		#N/A	#N/A	#N/A
HTR1A	#N/A	#N/A	#N/A		#N/A	#N/A	#N/A
HTR1B	#N/A	#N/A	#N/A		#N/A	#N/A	#N/A
HTR1D	Htr1d	Htr1d	Htr1d		#N/A	#N/A	#N/A
HTR1E	#N/A	#N/A	#N/A		#N/A	#N/A	#N/A
HTR1F	#N/A	#N/A	#N/A		#N/A	#N/A	#N/A
HTR2A	#N/A	#N/A	#N/A		#N/A	#N/A	#N/A
HTR2B	#N/A	#N/A	#N/A		#N/A	#N/A	#N/A
HTR2C	#N/A	#N/A	#N/A		#N/A	#N/A	#N/A
HTR3A	#N/A	#N/A	#N/A		Htr3a	Htr3a	Htr3a
HTR3B	#N/A	#N/A	#N/A		#N/A	#N/A	#N/A
HTR3C	#N/A	#N/A	#N/A		#N/A	#N/A	#N/A
HTR3D	#N/A	#N/A	#N/A		#N/A	#N/A	#N/A
HTR3E	#N/A	#N/A	#N/A		#N/A	#N/A	#N/A
HTR4	#N/A	#N/A	#N/A		#N/A	#N/A	#N/A
HTR5A	#N/A	#N/A	#N/A		#N/A	#N/A	#N/A
HTR6	#N/A	#N/A	#N/A		#N/A	#N/A	#N/A
HTR7	#N/A	#N/A	#N/A		#N/A	#N/A	#N/A
HTRA2	#N/A	#N/A	#N/A		#N/A	#N/A	#N/A
HTT	#N/A	#N/A	#N/A		#N/A	#N/A	#N/A
HUWE1	#N/A	#N/A	#N/A		#N/A	#N/A	#N/A
HVCN1	#N/A	#N/A	#N/A		#N/A	#N/A	#N/A
HYAL2	#N/A	#N/A	#N/A		#N/A	#N/A	#N/A
HYAL4	#N/A	#N/A	#N/A		#N/A	#N/A	#N/A
ICA1	#N/A	#N/A	#N/A		#N/A	Ica1	Ica1
ICAM1	Icam1	Icam1	Icam1		#N/A	#N/A	#N/A
ICAM2	#N/A	#N/A	#N/A		#N/A	#N/A	#N/A
ICAM3	#N/A	#N/A	#N/A		#N/A	#N/A	#N/A
ICAM4	#N/A	#N/A	#N/A		#N/A	#N/A	#N/A
ICAM5	#N/A	Icam5	Icam5		#N/A	#N/A	#N/A
ICMT	#N/A	#N/A	#N/A		#N/A	#N/A	#N/A
ICOS	#N/A	#N/A	#N/A		#N/A	#N/A	#N/A
ICOSLG	#N/A	#N/A	#N/A		#N/A	#N/A	#N/A
IER3	#N/A	#N/A	#N/A		#N/A	#N/A	#N/A
IER3IP1	#N/A	#N/A	#N/A		#N/A	#N/A	#N/A
IFI27	#N/A	#N/A	#N/A		#N/A	#N/A	#N/A
IFI30	#N/A	#N/A	#N/A		#N/A	#N/A	#N/A
IFI6	#N/A	#N/A	#N/A		#N/A	#N/A	#N/A
IFITM1	#N/A	#N/A	#N/A		#N/A	#N/A	#N/A
IFITM10	#N/A	#N/A	#N/A		#N/A	#N/A	Ifitm10
IFITM2	#N/A	#N/A	#N/A		#N/A	#N/A	#N/A
IFITM3	#N/A	Ifitm3	Ifitm3		#N/A	#N/A	#N/A
IFITM5	#N/A	#N/A	Ifitm5		#N/A	#N/A	#N/A
IFNAR1	#N/A	#N/A	#N/A		#N/A	#N/A	#N/A
IFNAR2	#N/A	#N/A	#N/A		#N/A	#N/A	#N/A
IFNGR1	#N/A	#N/A	#N/A		#N/A	#N/A	#N/A
IFNGR2	#N/A	#N/A	#N/A		#N/A	#N/A	#N/A
[truncated: 3,522 more rows]

## Sheet: VP
Protein Class	PTEN - Up				PTEN - Down
Gene	PIN	MED	ADV		PIN	MED	ADV
A3GALT2	#N/A	#N/A	#N/A		#N/A	A3galt2	A3galt2
A4GALT	#N/A	#N/A	#N/A		#N/A	A4galt	#N/A
AACS	#N/A	#N/A	#N/A		#N/A	#N/A	#N/A
AADACL3	Aadacl3	#N/A	#N/A		#N/A	#N/A	#N/A
AADACL4	#N/A	#N/A	#N/A		#N/A	#N/A	#N/A
AASDH	#N/A	#N/A	#N/A		#N/A	#N/A	#N/A
AATK	#N/A	#N/A	#N/A		#N/A	#N/A	#N/A
ABCA1	#N/A	#N/A	#N/A		#N/A	#N/A	#N/A
ABCA10	#N/A	#N/A	#N/A		#N/A	#N/A	#N/A
ABCA12	#N/A	#N/A	#N/A		#N/A	#N/A	#N/A
ABCA13	#N/A	#N/A	#N/A		#N/A	#N/A	#N/A
ABCA2	#N/A	#N/A	#N/A		#N/A	#N/A	#N/A
ABCA3	#N/A	#N/A	#N/A		#N/A	#N/A	#N/A
ABCA4	#N/A	#N/A	#N/A		#N/A	#N/A	#N/A
ABCA5	#N/A	#N/A	#N/A		#N/A	Abca5	Abca5
ABCA6	#N/A	#N/A	#N/A		#N/A	Abca6	Abca6
ABCA7	#N/A	#N/A	#N/A		#N/A	#N/A	#N/A
ABCA8	#N/A	#N/A	#N/A		#N/A	#N/A	#N/A
ABCA9	#N/A	#N/A	#N/A		#N/A	#N/A	#N/A
ABCB1	#N/A	#N/A	#N/A		#N/A	#N/A	#N/A
ABCB10	#N/A	#N/A	#N/A		#N/A	#N/A	#N/A
ABCB11	#N/A	#N/A	#N/A		#N/A	#N/A	#N/A
ABCB4	#N/A	#N/A	#N/A		#N/A	#N/A	#N/A
ABCB5	#N/A	#N/A	#N/A		#N/A	#N/A	#N/A
ABCB6	#N/A	#N/A	#N/A		#N/A	Abcb6	#N/A
ABCB7	#N/A	#N/A	#N/A		#N/A	#N/A	#N/A
ABCB8	#N/A	#N/A	#N/A		#N/A	#N/A	#N/A
ABCB9	#N/A	#N/A	#N/A		#N/A	#N/A	#N/A
ABCC1	#N/A	Abcc1	#N/A		#N/A	#N/A	#N/A
ABCC10	#N/A	#N/A	#N/A		#N/A	#N/A	#N/A
ABCC11	#N/A	#N/A	#N/A		#N/A	#N/A	#N/A
ABCC12	#N/A	#N/A	#N/A		#N/A	#N/A	#N/A
ABCC2	#N/A	#N/A	#N/A		#N/A	#N/A	#N/A
ABCC3	#N/A	#N/A	#N/A		#N/A	#N/A	#N/A
ABCC4	#N/A	#N/A	#N/A		#N/A	#N/A	#N/A
ABCC5	#N/A	Abcc5	Abcc5		#N/A	#N/A	#N/A
ABCC6	#N/A	#N/A	#N/A		#N/A	#N/A	#N/A
ABCC8	#N/A	#N/A	#N/A		#N/A	#N/A	#N/A
ABCC9	#N/A	#N/A	#N/A		#N/A	#N/A	#N/A
ABCD1	#N/A	#N/A	#N/A		#N/A	#N/A	#N/A
ABCD2	#N/A	#N/A	#N/A		#N/A	#N/A	#N/A
ABCD3	#N/A	#N/A	#N/A		#N/A	#N/A	#N/A
ABCD4	#N/A	#N/A	#N/A		#N/A	#N/A	#N/A
ABCG1	Abcg1	Abcg1	Abcg1		#N/A	#N/A	#N/A
ABCG2	#N/A	#N/A	Abcg2		#N/A	#N/A	#N/A
ABCG4	#N/A	#N/A	#N/A		#N/A	#N/A	Abcg4
ABCG5	Abcg5	Abcg5	Abcg5		#N/A	#N/A	#N/A
ABCG8	Abcg8	Abcg8	Abcg8		#N/A	#N/A	#N/A
ABHD1	#N/A	#N/A	#N/A		#N/A	Abhd1	#N/A
ABHD12	#N/A	#N/A	#N/A		#N/A	#N/A	Abhd12
ABHD13	#N/A	#N/A	#N/A		#N/A	#N/A	#N/A
ABHD14A	#N/A	#N/A	#N/A		#N/A	#N/A	#N/A
ABHD16A	#N/A	#N/A	#N/A		#N/A	#N/A	#N/A
ABHD2	#N/A	#N/A	#N/A		#N/A	#N/A	#N/A
ABHD3	#N/A	#N/A	#N/A		#N/A	Abhd3	#N/A
ABHD6	#N/A	#N/A	#N/A		#N/A	#N/A	#N/A
ABO	#N/A	#N/A	#N/A		#N/A	Abo	Abo
AC001226.2	#N/A	#N/A	#N/A		#N/A	#N/A	#N/A
AC004691.2	#N/A	#N/A	#N/A		#N/A	#N/A	#N/A
AC004754.1	#N/A	#N/A	#N/A		#N/A	#N/A	#N/A
AC004832.3	#N/A	#N/A	#N/A		#N/A	#N/A	#N/A
AC005551.1	#N/A	#N/A	#N/A		#N/A	#N/A	#N/A
AC006538.2	#N/A	#N/A	#N/A		#N/A	#N/A	#N/A
AC007040.2	#N/A	#N/A	#N/A		#N/A	#N/A	#N/A
AC008397.1	#N/A	#N/A	#N/A		#N/A	#N/A	#N/A
AC009163.4	#N/A	#N/A	#N/A		#N/A	#N/A	#N/A
AC009477.2	#N/A	#N/A	#N/A		#N/A	#N/A	#N/A
AC010319.2	#N/A	#N/A	#N/A		#N/A	#N/A	#N/A
AC010325.1	#N/A	#N/A	#N/A		#N/A	#N/A	#N/A
AC011448.1	#N/A	#N/A	#N/A		#N/A	#N/A	#N/A
AC011604.2	#N/A	#N/A	#N/A		#N/A	#N/A	#N/A
AC018709.1	#N/A	#N/A	#N/A		#N/A	#N/A	#N/A
AC018755.2	#N/A	#N/A	#N/A		#N/A	#N/A	#N/A
AC022167.5	#N/A	#N/A	#N/A		#N/A	#N/A	#N/A
AC024592.3	#N/A	#N/A	#N/A		#N/A	#N/A	#N/A
AC026316.5	#N/A	#N/A	#N/A		#N/A	#N/A	#N/A
AC068580.4	#N/A	#N/A	#N/A		#N/A	#N/A	#N/A
AC068775.1	#N/A	#N/A	#N/A		#N/A	#N/A	#N/A
AC068987.5	#N/A	#N/A	#N/A		#N/A	#N/A	#N/A
AC078864.2	#N/A	#N/A	#N/A		#N/A	#N/A	#N/A
AC087498.1	#N/A	#N/A	#N/A		#N/A	#N/A	#N/A
AC092143.1	#N/A	#N/A	#N/A		#N/A	#N/A	#N/A
AC092718.3	#N/A	#N/A	#N/A		#N/A	#N/A	#N/A
AC093525.2	#N/A	#N/A	#N/A		#N/A	#N/A	#N/A
AC097637.1	#N/A	#N/A	#N/A		#N/A	#N/A	#N/A
AC100868.1	#N/A	#N/A	#N/A		#N/A	#N/A	#N/A
AC116565.1	#N/A	#N/A	#N/A		#N/A	#N/A	#N/A
AC117457.1	#N/A	#N/A	#N/A		#N/A	#N/A	#N/A
AC118553.2	#N/A	#N/A	#N/A		#N/A	#N/A	#N/A
AC119396.1	#N/A	#N/A	#N/A		#N/A	#N/A	#N/A
AC126755.2	#N/A	#N/A	#N/A		#N/A	#N/A	#N/A
AC129492.3	#N/A	#N/A	#N/A		#N/A	#N/A	#N/A
AC131160.1	#N/A	#N/A	#N/A		#N/A	#N/A	#N/A
AC134669.1	#N/A	#N/A	#N/A		#N/A	#N/A	#N/A
AC134980.5	#N/A	#N/A	#N/A		#N/A	#N/A	#N/A
AC135068.1	#N/A	#N/A	#N/A		#N/A	#N/A	#N/A
AC135068.3	#N/A	#N/A	#N/A		#N/A	#N/A	#N/A
AC136616.1	#N/A	#N/A	#N/A		#N/A	#N/A	#N/A
AC138811.2	#N/A	#N/A	#N/A		#N/A	#N/A	#N/A
AC138894.1	#N/A	#N/A	#N/A		#N/A	#N/A	#N/A
AC138969.1	#N/A	#N/A	#N/A		#N/A	#N/A	#N/A
AC171558.1	#N/A	#N/A	#N/A		#N/A	#N/A	#N/A
AC171558.3	#N/A	#N/A	#N/A		#N/A	#N/A	#N/A
AC213203.1	#N/A	#N/A	#N/A		#N/A	#N/A	#N/A
ACBD4	#N/A	#N/A	#N/A		#N/A	#N/A	#N/A
ACBD5	#N/A	#N/A	#N/A		#N/A	#N/A	#N/A
ACE	#N/A	#N/A	#N/A		#N/A	#N/A	#N/A
ACE2	#N/A	#N/A	#N/A		#N/A	#N/A	#N/A
ACER1	#N/A	#N/A	#N/A		#N/A	#N/A	#N/A
ACER2	#N/A	#N/A	#N/A		#N/A	#N/A	#N/A
ACER3	#N/A	#N/A	#N/A		#N/A	#N/A	#N/A
ACHE	#N/A	#N/A	#N/A		#N/A	#N/A	#N/A
ACKR1	#N/A	#N/A	#N/A		#N/A	#N/A	#N/A
ACKR2	#N/A	#N/A	#N/A		#N/A	#N/A	#N/A
ACKR3	#N/A	#N/A	#N/A		#N/A	#N/A	#N/A
ACKR4	#N/A	#N/A	#N/A		#N/A	#N/A	#N/A
ACP2	#N/A	#N/A	#N/A		#N/A	#N/A	#N/A
ACP4	#N/A	#N/A	#N/A		#N/A	#N/A	#N/A
ACPP	#N/A	#N/A	#N/A		#N/A	#N/A	#N/A
ACSBG2	#N/A	#N/A	#N/A		#N/A	#N/A	#N/A
ACSF2	#N/A	#N/A	#N/A		#N/A	#N/A	#N/A
ACSF3	#N/A	#N/A	#N/A		#N/A	#N/A	#N/A
ACSL1	#N/A	#N/A	#N/A		#N/A	#N/A	#N/A
ACSL3	#N/A	#N/A	#N/A		#N/A	#N/A	#N/A
ACSL4	#N/A	#N/A	#N/A		#N/A	#N/A	#N/A
ACSL5	#N/A	#N/A	#N/A		#N/A	#N/A	#N/A
ACSL6	#N/A	#N/A	#N/A		#N/A	#N/A	#N/A
ACSM1	#N/A	Acsm1	#N/A		#N/A	#N/A	#N/A
ACSM2A	#N/A	#N/A	#N/A		#N/A	#N/A	#N/A
ACSM2B	#N/A	#N/A	#N/A		#N/A	#N/A	#N/A
ACSM4	#N/A	#N/A	#N/A		#N/A	#N/A	#N/A
ACSM6	#N/A	#N/A	#N/A		#N/A	#N/A	#N/A
ACSS1	#N/A	#N/A	#N/A		#N/A	#N/A	#N/A
ACSS2	#N/A	#N/A	#N/A		#N/A	#N/A	#N/A
ACSS3	#N/A	#N/A	#N/A		#N/A	#N/A	#N/A
ACVR1	#N/A	#N/A	#N/A		#N/A	#N/A	#N/A
ACVR1B	#N/A	#N/A	#N/A		#N/A	#N/A	#N/A
ACVR1C	#N/A	#N/A	#N/A		Acvr1c	Acvr1c	Acvr1c
ACVR2A	#N/A	#N/A	#N/A		#N/A	#N/A	#N/A
ACVR2B	#N/A	#N/A	#N/A		#N/A	#N/A	#N/A
ACVRL1	#N/A	#N/A	#N/A		#N/A	#N/A	#N/A
ADAM10	#N/A	Adam10	#N/A		#N/A	#N/A	#N/A
ADAM11	#N/A	#N/A	#N/A		Adam11	#N/A	#N/A
ADAM12	#N/A	#N/A	#N/A		#N/A	#N/A	#N/A
ADAM15	#N/A	#N/A	#N/A		#N/A	#N/A	#N/A
ADAM17	#N/A	#N/A	#N/A		#N/A	#N/A	#N/A
ADAM18	#N/A	#N/A	#N/A		#N/A	#N/A	#N/A
ADAM19	#N/A	#N/A	#N/A		#N/A	#N/A	#N/A
ADAM2	#N/A	#N/A	#N/A		#N/A	#N/A	#N/A
ADAM20	#N/A	#N/A	#N/A		#N/A	#N/A	#N/A
ADAM21	#N/A	#N/A	#N/A		#N/A	#N/A	#N/A
ADAM22	#N/A	#N/A	#N/A		#N/A	#N/A	#N/A
ADAM23	#N/A	#N/A	#N/A		#N/A	#N/A	#N/A
ADAM28	#N/A	#N/A	#N/A		#N/A	#N/A	#N/A
ADAM29	#N/A	#N/A	#N/A		#N/A	#N/A	#N/A
ADAM30	#N/A	#N/A	#N/A		#N/A	#N/A	#N/A
ADAM32	#N/A	#N/A	#N/A		#N/A	#N/A	#N/A
ADAM33	#N/A	#N/A	#N/A		#N/A	Adam33	Adam33
ADAM7	#N/A	#N/A	#N/A		#N/A	#N/A	#N/A
ADAM8	#N/A	Adam8	Adam8		#N/A	#N/A	#N/A
ADAM9	#N/A	#N/A	#N/A		#N/A	#N/A	#N/A
ADAMTS1	#N/A	#N/A	#N/A		#N/A	#N/A	#N/A
ADAMTS4	#N/A	#N/A	Adamts4		#N/A	#N/A	#N/A
ADCK2	#N/A	#N/A	#N/A		#N/A	#N/A	#N/A
ADCK5	#N/A	#N/A	#N/A		#N/A	#N/A	#N/A
ADCY1	#N/A	#N/A	#N/A		Adcy1	Adcy1	Adcy1
ADCY10	#N/A	#N/A	#N/A		#N/A	#N/A	#N/A
ADCY2	#N/A	#N/A	#N/A		#N/A	#N/A	#N/A
ADCY3	#N/A	#N/A	Adcy3		#N/A	#N/A	#N/A
ADCY4	#N/A	#N/A	#N/A		#N/A	#N/A	#N/A
ADCY5	#N/A	#N/A	#N/A		Adcy5	Adcy5	Adcy5
ADCY6	#N/A	#N/A	#N/A		#N/A	#N/A	#N/A
ADCY7	#N/A	#N/A	#N/A		#N/A	#N/A	#N/A
ADCY8	#N/A	Adcy8	#N/A		#N/A	#N/A	#N/A
ADCY9	#N/A	#N/A	#N/A		#N/A	#N/A	Adcy9
ADCYAP1R1	#N/A	#N/A	#N/A		#N/A	#N/A	#N/A
ADGRA1	#N/A	#N/A	#N/A		#N/A	#N/A	#N/A
ADGRA2	#N/A	#N/A	#N/A		#N/A	#N/A	#N/A
ADGRA3	#N/A	#N/A	#N/A		#N/A	#N/A	#N/A
ADGRB1	#N/A	#N/A	#N/A		#N/A	#N/A	#N/A
ADGRB2	#N/A	#N/A	#N/A		#N/A	#N/A	#N/A
ADGRB3	#N/A	#N/A	#N/A		#N/A	#N/A	#N/A
ADGRD1	#N/A	#N/A	#N/A		#N/A	#N/A	#N/A
ADGRD2	#N/A	#N/A	#N/A		#N/A	#N/A	#N/A
ADGRE1	#N/A	#N/A	#N/A		#N/A	#N/A	#N/A
ADGRE2	#N/A	#N/A	#N/A		#N/A	#N/A	#N/A
ADGRE3	#N/A	#N/A	#N/A		#N/A	#N/A	#N/A
ADGRE5	#N/A	#N/A	#N/A		#N/A	#N/A	#N/A
ADGRF1	#N/A	#N/A	#N/A		#N/A	#N/A	#N/A
ADGRF2	#N/A	#N/A	#N/A		#N/A	#N/A	#N/A
ADGRF3	#N/A	#N/A	#N/A		#N/A	#N/A	#N/A
ADGRF4	#N/A	#N/A	#N/A		#N/A	#N/A	#N/A
ADGRF5	#N/A	#N/A	#N/A		#N/A	#N/A	#N/A
ADGRG1	#N/A	#N/A	#N/A		#N/A	#N/A	#N/A
ADGRG2	#N/A	#N/A	#N/A		#N/A	#N/A	#N/A
ADGRG3	#N/A	#N/A	#N/A		#N/A	#N/A	#N/A
ADGRG4	#N/A	#N/A	#N/A		#N/A	#N/A	#N/A
ADGRG5	#N/A	#N/A	#N/A		#N/A	#N/A	#N/A
ADGRG6	#N/A	#N/A	#N/A		#N/A	#N/A	#N/A
ADGRG7	#N/A	#N/A	#N/A		#N/A	#N/A	#N/A
ADGRL1	#N/A	#N/A	#N/A		#N/A	#N/A	#N/A
ADGRL2	#N/A	#N/A	#N/A		#N/A	#N/A	#N/A
ADGRL3	#N/A	#N/A	#N/A		#N/A	#N/A	#N/A
ADGRL4	#N/A	#N/A	#N/A		#N/A	#N/A	#N/A
ADGRV1	#N/A	#N/A	#N/A		#N/A	#N/A	#N/A
ADIG	#N/A	#N/A	#N/A		#N/A	#N/A	#N/A
ADIPOR1	#N/A	#N/A	#N/A		#N/A	#N/A	#N/A
ADIPOR2	#N/A	#N/A	#N/A		#N/A	#N/A	#N/A
ADORA1	#N/A	#N/A	#N/A		#N/A	#N/A	#N/A
ADORA2A	#N/A	#N/A	Adora2a		#N/A	#N/A	#N/A
ADORA2B	Adora2b	#N/A	Adora2b		#N/A	#N/A	#N/A
ADORA3	#N/A	#N/A	#N/A		#N/A	#N/A	#N/A
ADPRM	#N/A	#N/A	#N/A		#N/A	#N/A	#N/A
ADRA1A	#N/A	#N/A	#N/A		#N/A	Adra1a	Adra1a
ADRA1B	#N/A	#N/A	#N/A		#N/A	#N/A	#N/A
ADRA1D	#N/A	#N/A	#N/A		#N/A	#N/A	#N/A
ADRA2A	#N/A	Adra2a	#N/A		#N/A	#N/A	#N/A
ADRA2B	#N/A	#N/A	#N/A		#N/A	#N/A	#N/A
ADRA2C	#N/A	#N/A	#N/A		#N/A	#N/A	#N/A
ADRB1	Adrb1	Adrb1	Adrb1		#N/A	#N/A	#N/A
ADRB2	#N/A	#N/A	#N/A		#N/A	#N/A	#N/A
ADRB3	#N/A	#N/A	#N/A		#N/A	Adrb3	Adrb3
ADTRP	#N/A	#N/A	#N/A		#N/A	#N/A	#N/A
AF241726.2	#N/A	#N/A	#N/A		#N/A	#N/A	#N/A
AFG3L2	#N/A	#N/A	#N/A		#N/A	#N/A	#N/A
AGER	#N/A	#N/A	#N/A		#N/A	#N/A	#N/A
AGL	#N/A	#N/A	#N/A		#N/A	#N/A	#N/A
AGMO	#N/A	#N/A	#N/A		#N/A	#N/A	#N/A
AGPAT1	#N/A	#N/A	#N/A		#N/A	#N/A	#N/A
AGPAT2	#N/A	#N/A	#N/A		#N/A	#N/A	#N/A
AGPAT3	#N/A	#N/A	#N/A		#N/A	Agpat3	#N/A
AGPAT4	#N/A	#N/A	#N/A		#N/A	#N/A	#N/A
AGPAT5	#N/A	#N/A	#N/A		#N/A	#N/A	#N/A
AGRN	#N/A	Agrn	#N/A		#N/A	#N/A	#N/A
AGTR1	#N/A	#N/A	#N/A		#N/A	#N/A	#N/A
AGTR2	#N/A	#N/A	#N/A		#N/A	#N/A	#N/A
AGTRAP	#N/A	#N/A	#N/A		#N/A	#N/A	#N/A
AIFM1	#N/A	#N/A	#N/A		#N/A	#N/A	#N/A
AIG1	#N/A	#N/A	#N/A		#N/A	#N/A	#N/A
AJAP1	#N/A	#N/A	#N/A		#N/A	Ajap1	Ajap1
AKAP1	#N/A	#N/A	#N/A		#N/A	#N/A	#N/A
AKAP6	#N/A	#N/A	#N/A		#N/A	#N/A	#N/A
AKAP9	#N/A	#N/A	#N/A		#N/A	#N/A	#N/A
AL034430.1	#N/A	#N/A	#N/A		#N/A	#N/A	#N/A
AL035460.1	#N/A	#N/A	#N/A		#N/A	#N/A	#N/A
AL121845.3	#N/A	#N/A	#N/A		#N/A	#N/A	#N/A
AL121900.2	#N/A	#N/A	#N/A		#N/A	#N/A	#N/A
AL136295.1	#N/A	#N/A	#N/A		#N/A	#N/A	#N/A
AL136295.3	#N/A	#N/A	#N/A		#N/A	#N/A	#N/A
AL136373.1	#N/A	#N/A	#N/A		#N/A	#N/A	#N/A
AL391650.1	#N/A	#N/A	#N/A		#N/A	#N/A	#N/A
AL590132.1	#N/A	#N/A	#N/A		#N/A	#N/A	#N/A
AL592490.1	#N/A	#N/A	#N/A		#N/A	#N/A	#N/A
AL662820.1	#N/A	#N/A	#N/A		#N/A	#N/A	#N/A
AL669918.1	#N/A	#N/A	#N/A		#N/A	#N/A	#N/A
AL691442.1	#N/A	#N/A	#N/A		#N/A	#N/A	#N/A
AL845331.2	#N/A	#N/A	#N/A		#N/A	#N/A	#N/A
ALCAM	#N/A	#N/A	#N/A		#N/A	#N/A	#N/A
ALDH16A1	#N/A	#N/A	#N/A		#N/A	#N/A	#N/A
ALDH3A2	#N/A	#N/A	#N/A		#N/A	Aldh3a2	Aldh3a2
ALDH3B2	#N/A	#N/A	#N/A		#N/A	#N/A	#N/A
ALDH6A1	#N/A	#N/A	#N/A		#N/A	Aldh6a1	Aldh6a1
ALDOA	#N/A	#N/A	#N/A		#N/A	#N/A	#N/A
ALG1	#N/A	#N/A	#N/A		#N/A	#N/A	#N/A
ALG10	#N/A	#N/A	#N/A		#N/A	#N/A	#N/A
ALG10B	#N/A	#N/A	#N/A		#N/A	#N/A	#N/A
ALG11	#N/A	#N/A	#N/A		#N/A	#N/A	#N/A
ALG12	#N/A	#N/A	#N/A		#N/A	#N/A	#N/A
ALG14	#N/A	#N/A	#N/A		#N/A	#N/A	#N/A
ALG2	#N/A	#N/A	#N/A		#N/A	#N/A	#N/A
ALG3	#N/A	#N/A	#N/A		#N/A	#N/A	#N/A
ALG5	#N/A	#N/A	#N/A		#N/A	#N/A	#N/A
ALG6	#N/A	#N/A	#N/A		#N/A	#N/A	#N/A
ALG8	#N/A	#N/A	#N/A		#N/A	#N/A	#N/A
ALG9	#N/A	#N/A	#N/A		#N/A	#N/A	#N/A
ALK	#N/A	#N/A	#N/A		Alk	Alk	Alk
ALOX5AP	#N/A	#N/A	#N/A		#N/A	#N/A	#N/A
ALPK1	#N/A	Alpk1	Alpk1		#N/A	#N/A	#N/A
ALPL	#N/A	#N/A	#N/A		#N/A	#N/A	#N/A
AMFR	#N/A	#N/A	#N/A		#N/A	#N/A	#N/A
AMHR2	#N/A	Amhr2	Amhr2		#N/A	#N/A	#N/A
AMIGO1	#N/A	#N/A	#N/A		#N/A	#N/A	#N/A
AMIGO2	#N/A	#N/A	#N/A		#N/A	#N/A	#N/A
AMIGO3	#N/A	#N/A	#N/A		#N/A	#N/A	#N/A
AMN	#N/A	#N/A	Amn		#N/A	#N/A	#N/A
ANAPC1	#N/A	#N/A	#N/A		#N/A	#N/A	#N/A
ANKH	#N/A	#N/A	#N/A		#N/A	#N/A	#N/A
ANKLE1	#N/A	Ankle1	Ankle1		#N/A	#N/A	#N/A
ANKLE2	#N/A	#N/A	#N/A		#N/A	#N/A	#N/A
ANKRD29	#N/A	#N/A	#N/A		#N/A	#N/A	#N/A
ANKRD46	#N/A	#N/A	#N/A		#N/A	#N/A	#N/A
ANO1	#N/A	#N/A	#N/A		#N/A	#N/A	#N/A
ANO10	#N/A	#N/A	#N/A		#N/A	#N/A	#N/A
ANO2	#N/A	#N/A	#N/A		#N/A	#N/A	#N/A
ANO3	#N/A	#N/A	#N/A		#N/A	#N/A	#N/A
ANO4	#N/A	Ano4	#N/A		#N/A	#N/A	#N/A
ANO5	#N/A	#N/A	#N/A		#N/A	#N/A	#N/A
ANO6	#N/A	#N/A	#N/A		#N/A	#N/A	#N/A
ANO7	#N/A	#N/A	#N/A		#N/A	#N/A	#N/A
ANO8	#N/A	#N/A	#N/A		#N/A	#N/A	#N/A
ANO9	#N/A	Ano9	#N/A		#N/A	#N/A	#N/A
ANPEP	#N/A	#N/A	#N/A		#N/A	#N/A	#N/A
ANTXR1	#N/A	#N/A	#N/A		#N/A	#N/A	#N/A
ANTXR2	#N/A	#N/A	Antxr2		#N/A	#N/A	#N/A
ANTXRL	#N/A	#N/A	#N/A		#N/A	#N/A	#N/A
AP000350.4	#N/A	#N/A	#N/A		#N/A	#N/A	#N/A
AP000781.2	#N/A	#N/A	#N/A		#N/A	#N/A	#N/A
AP001781.2	#N/A	#N/A	#N/A		#N/A	#N/A	#N/A
AP002512.3	#N/A	#N/A	#N/A		#N/A	#N/A	#N/A
AP003071.5	#N/A	#N/A	#N/A		#N/A	#N/A	#N/A
AP006437.1	#N/A	#N/A	#N/A		#N/A	#N/A	#N/A
AP5S1	#N/A	#N/A	#N/A		#N/A	#N/A	#N/A
APCDD1	#N/A	#N/A	#N/A		#N/A	#N/A	#N/A
APCDD1L	#N/A	#N/A	#N/A		#N/A	#N/A	#N/A
APH1A	#N/A	#N/A	#N/A		#N/A	#N/A	#N/A
APH1B	#N/A	#N/A	#N/A		#N/A	#N/A	#N/A
APLF	#N/A	#N/A	#N/A		#N/A	#N/A	#N/A
APLNR	#N/A	#N/A	#N/A		#N/A	#N/A	#N/A
APLP1	#N/A	#N/A	Aplp1		#N/A	#N/A	#N/A
APLP2	#N/A	#N/A	#N/A		#N/A	#N/A	#N/A
APMAP	#N/A	#N/A	#N/A		#N/A	#N/A	#N/A
APOC4-APOC2	#N/A	#N/A	#N/A		#N/A	#N/A	#N/A
APOL1	#N/A	#N/A	#N/A		#N/A	#N/A	#N/A
APOL2	#N/A	#N/A	#N/A		#N/A	#N/A	#N/A
APOL4	#N/A	#N/A	#N/A		#N/A	#N/A	#N/A
APOL6	#N/A	#N/A	#N/A		#N/A	#N/A	#N/A
APOLD1	#N/A	#N/A	#N/A		#N/A	#N/A	#N/A
APOO	#N/A	#N/A	#N/A		#N/A	#N/A	#N/A
APP	#N/A	#N/A	#N/A		#N/A	#N/A	#N/A
AQP1	#N/A	#N/A	#N/A		#N/A	#N/A	#N/A
AQP10	#N/A	#N/A	#N/A		#N/A	#N/A	#N/A
AQP11	#N/A	#N/A	#N/A		#N/A	#N/A	#N/A
AQP12A	#N/A	#N/A	#N/A		#N/A	#N/A	#N/A
AQP12B	#N/A	#N/A	#N/A		#N/A	#N/A	#N/A
AQP2	#N/A	#N/A	#N/A		#N/A	#N/A	#N/A
AQP3	#N/A	#N/A	#N/A		#N/A	#N/A	#N/A
AQP4	#N/A	#N/A	#N/A		#N/A	#N/A	#N/A
AQP5	#N/A	#N/A	#N/A		Aqp5	Aqp5	Aqp5
AQP6	#N/A	#N/A	#N/A		#N/A	#N/A	#N/A
AQP7	#N/A	#N/A	#N/A		#N/A	#N/A	#N/A
AQP8	#N/A	#N/A	#N/A		#N/A	#N/A	#N/A
AQP9	#N/A	#N/A	#N/A		#N/A	#N/A	#N/A
AQR	#N/A	#N/A	#N/A		#N/A	#N/A	#N/A
AREG	#N/A	#N/A	#N/A		#N/A	#N/A	#N/A
AREL1	#N/A	#N/A	#N/A		#N/A	#N/A	#N/A
ARHGAP1	#N/A	#N/A	#N/A		#N/A	#N/A	#N/A
ARHGAP26	#N/A	#N/A	#N/A		#N/A	#N/A	#N/A
ARHGAP42	#N/A	#N/A	Arhgap42		#N/A	#N/A	#N/A
ARIH2OS	#N/A	#N/A	#N/A		#N/A	#N/A	#N/A
ARL10	#N/A	#N/A	#N/A		#N/A	#N/A	#N/A
ARL6IP1	#N/A	#N/A	#N/A		#N/A	#N/A	#N/A
ARL6IP5	#N/A	#N/A	#N/A		#N/A	#N/A	#N/A
ARL6IP6	#N/A	#N/A	#N/A		#N/A	#N/A	#N/A
ARMC10	#N/A	#N/A	#N/A		#N/A	#N/A	#N/A
ARMCX1	#N/A	#N/A	#N/A		#N/A	#N/A	#N/A
ARMCX2	#N/A	#N/A	Armcx2		#N/A	#N/A	#N/A
ARMCX3	#N/A	#N/A	#N/A		#N/A	#N/A	#N/A
ARMCX6	#N/A	#N/A	#N/A		#N/A	#N/A	#N/A
ARSD	#N/A	#N/A	#N/A		#N/A	#N/A	#N/A
ARSE	#N/A	#N/A	#N/A		#N/A	#N/A	#N/A
ARSF	#N/A	#N/A	#N/A		#N/A	#N/A	#N/A
ARSH	#N/A	#N/A	#N/A		#N/A	#N/A	#N/A
ART1	#N/A	#N/A	#N/A		#N/A	#N/A	#N/A
ART3	#N/A	#N/A	#N/A		Art3	#N/A	#N/A
ART4	#N/A	#N/A	#N/A		#N/A	#N/A	#N/A
ARV1	#N/A	#N/A	#N/A		#N/A	#N/A	#N/A
ASB11	#N/A	#N/A	#N/A		#N/A	#N/A	#N/A
ASB18	#N/A	#N/A	#N/A		#N/A	#N/A	#N/A
ASB5	#N/A	#N/A	#N/A		#N/A	#N/A	#N/A
ASGR2	#N/A	#N/A	#N/A		#N/A	#N/A	#N/A
ASIC1	#N/A	#N/A	#N/A		#N/A	#N/A	#N/A
ASIC2	#N/A	#N/A	#N/A		#N/A	#N/A	#N/A
ASIC3	#N/A	#N/A	#N/A		#N/A	#N/A	#N/A
ASIC4	#N/A	#N/A	#N/A		Asic4	Asic4	Asic4
ASIC5	#N/A	#N/A	#N/A		#N/A	#N/A	#N/A
ASPH	#N/A	#N/A	#N/A		#N/A	#N/A	#N/A
ASPHD1	#N/A	#N/A	#N/A		#N/A	#N/A	#N/A
ASPHD2	#N/A	#N/A	#N/A		#N/A	#N/A	#N/A
ASPRV1	#N/A	#N/A	#N/A		#N/A	#N/A	#N/A
ASTN1	#N/A	#N/A	#N/A		#N/A	#N/A	#N/A
ASTN2	#N/A	#N/A	#N/A		#N/A	#N/A	#N/A
ASZ1	#N/A	#N/A	#N/A		#N/A	#N/A	#N/A
ATAD1	#N/A	#N/A	#N/A		#N/A	#N/A	#N/A
ATF6	#N/A	#N/A	#N/A		#N/A	#N/A	#N/A
ATF6B	#N/A	#N/A	#N/A		#N/A	#N/A	#N/A
ATF7	#N/A	#N/A	#N/A		#N/A	#N/A	#N/A
ATG9A	#N/A	#N/A	#N/A		#N/A	#N/A	#N/A
ATG9B	#N/A	#N/A	#N/A		#N/A	#N/A	#N/A
ATL1	#N/A	#N/A	#N/A		#N/A	#N/A	#N/A
ATL2	#N/A	#N/A	#N/A		#N/A	#N/A	#N/A
ATL3	#N/A	#N/A	#N/A		#N/A	#N/A	#N/A
ATM	#N/A	#N/A	#N/A		#N/A	#N/A	#N/A
ATP10A	#N/A	#N/A	#N/A		#N/A	#N/A	#N/A
ATP10B	Atp10b	Atp10b	Atp10b		#N/A	#N/A	#N/A
ATP10D	#N/A	#N/A	#N/A		#N/A	#N/A	#N/A
ATP11A	#N/A	#N/A	#N/A		#N/A	#N/A	#N/A
ATP11B	#N/A	#N/A	#N/A		#N/A	#N/A	#N/A
ATP11C	#N/A	#N/A	#N/A		#N/A	#N/A	#N/A
ATP12A	#N/A	#N/A	#N/A		#N/A	#N/A	Atp12a
ATP13A1	#N/A	#N/A	#N/A		#N/A	#N/A	#N/A
ATP13A2	#N/A	#N/A	#N/A		#N/A	#N/A	#N/A
ATP13A3	#N/A	#N/A	#N/A		#N/A	#N/A	#N/A
ATP13A4	#N/A	#N/A	#N/A		#N/A	Atp13a4	#N/A
ATP13A5	#N/A	Atp13a5	#N/A		#N/A	#N/A	#N/A
ATP1A1	#N/A	#N/A	#N/A		#N/A	#N/A	#N/A
ATP1A2	#N/A	#N/A	#N/A		#N/A	Atp1a2	#N/A
ATP1A3	#N/A	#N/A	#N/A		#N/A	#N/A	#N/A
ATP1A4	#N/A	#N/A	#N/A		#N/A	#N/A	#N/A
ATP1B1	#N/A	#N/A	#N/A		#N/A	#N/A	#N/A
ATP1B2	#N/A	#N/A	#N/A		#N/A	#N/A	#N/A
ATP1B3	#N/A	#N/A	#N/A		#N/A	#N/A	#N/A
ATP1B4	#N/A	#N/A	#N/A		#N/A	#N/A	#N/A
ATP2A1	#N/A	#N/A	#N/A		#N/A	#N/A	#N/A
ATP2A2	#N/A	#N/A	#N/A		#N/A	#N/A	#N/A
ATP2A3	Atp2a3	Atp2a3	#N/A		#N/A	#N/A	#N/A
ATP2B1	#N/A	#N/A	#N/A		#N/A	#N/A	#N/A
ATP2B2	#N/A	#N/A	#N/A		#N/A	#N/A	#N/A
ATP2B3	#N/A	#N/A	#N/A		Atp2b3	Atp2b3	#N/A
ATP2B4	#N/A	#N/A	#N/A		Atp2b4	#N/A	#N/A
ATP2C1	#N/A	#N/A	#N/A		#N/A	#N/A	#N/A
ATP2C2	#N/A	#N/A	#N/A		#N/A	#N/A	#N/A
ATP4A	Atp4a	Atp4a	#N/A		#N/A	#N/A	#N/A
ATP4B	#N/A	#N/A	#N/A		#N/A	#N/A	#N/A
ATP5MC1	#N/A	#N/A	#N/A		#N/A	#N/A	#N/A
ATP5MC2	#N/A	#N/A	#N/A		#N/A	#N/A	#N/A
ATP5MC3	#N/A	#N/A	#N/A		#N/A	#N/A	#N/A
ATP5MD	#N/A	#N/A	#N/A		#N/A	#N/A	#N/A
ATP5MF	#N/A	#N/A	#N/A		#N/A	#N/A	#N/A
ATP5MG	#N/A	#N/A	#N/A		#N/A	#N/A	#N/A
ATP5MPL	#N/A	#N/A	#N/A		#N/A	#N/A	#N/A
ATP5PB	#N/A	#N/A	#N/A		#N/A	#N/A	#N/A
ATP6AP1	#N/A	#N/A	#N/A		#N/A	#N/A	#N/A
ATP6AP1L	#N/A	#N/A	#N/A		#N/A	#N/A	#N/A
ATP6AP2	#N/A	#N/A	#N/A		#N/A	#N/A	#N/A
ATP6V0A1	#N/A	#N/A	#N/A		#N/A	#N/A	#N/A
ATP6V0A2	#N/A	#N/A	#N/A		#N/A	#N/A	#N/A
ATP6V0A4	#N/A	Atp6v0a4	Atp6v0a4		#N/A	#N/A	#N/A
ATP6V0B	#N/A	#N/A	#N/A		#N/A	#N/A	#N/A
ATP6V0C	#N/A	#N/A	#N/A		#N/A	#N/A	#N/A
ATP6V0E1	#N/A	#N/A	#N/A		#N/A	#N/A	#N/A
ATP6V0E2	#N/A	#N/A	#N/A		#N/A	#N/A	#N/A
ATP7A	#N/A	#N/A	#N/A		#N/A	#N/A	#N/A
ATP7B	#N/A	#N/A	#N/A		#N/A	#N/A	#N/A
ATP8A1	#N/A	#N/A	#N/A		#N/A	#N/A	#N/A
ATP8A2	#N/A	#N/A	#N/A		#N/A	#N/A	#N/A
ATP8B1	#N/A	#N/A	#N/A		#N/A	#N/A	#N/A
ATP8B2	#N/A	#N/A	#N/A		#N/A	#N/A	#N/A
ATP8B3	#N/A	#N/A	#N/A		#N/A	#N/A	#N/A
ATP8B4	#N/A	#N/A	#N/A		#N/A	#N/A	#N/A
ATP9A	#N/A	#N/A	#N/A		#N/A	#N/A	#N/A
ATP9B	#N/A	#N/A	#N/A		#N/A	#N/A	#N/A
ATR	#N/A	#N/A	#N/A		#N/A	#N/A	#N/A
ATRAID	#N/A	#N/A	#N/A		#N/A	#N/A	#N/A
ATRN	#N/A	#N/A	#N/A		#N/A	#N/A	#N/A
ATRNL1	#N/A	#N/A	#N/A		#N/A	#N/A	#N/A
ATXN3	#N/A	#N/A	#N/A		#N/A	#N/A	#N/A
AUP1	#N/A	#N/A	#N/A		#N/A	#N/A	#N/A
AVL9	#N/A	#N/A	#N/A		#N/A	#N/A	#N/A
AVPR1A	#N/A	#N/A	#N/A		#N/A	#N/A	#N/A
AVPR1B	#N/A	#N/A	#N/A		#N/A	#N/A	#N/A
AVPR2	#N/A	#N/A	#N/A		#N/A	#N/A	#N/A
AWAT1	#N/A	#N/A	#N/A		#N/A	#N/A	#N/A
AWAT2	#N/A	#N/A	#N/A		#N/A	#N/A	#N/A
AXL	#N/A	#N/A	#N/A		#N/A	#N/A	#N/A
B3GALT2	B3galt2	#N/A	#N/A		#N/A	#N/A	#N/A
B3GAT2	#N/A	#N/A	#N/A		#N/A	#N/A	#N/A
B3GNT10	#N/A	#N/A	#N/A		#N/A	#N/A	#N/A
B3GNT2	#N/A	#N/A	#N/A		#N/A	#N/A	#N/A
B4GALNT2	B4galnt2	#N/A	#N/A		#N/A	#N/A	#N/A
B4GALT1	#N/A	#N/A	#N/A		#N/A	#N/A	#N/A
B4GALT2	#N/A	#N/A	#N/A		#N/A	#N/A	#N/A
BACE1	#N/A	#N/A	#N/A		#N/A	#N/A	#N/A
BACE2	Bace2	Bace2	#N/A		#N/A	#N/A	#N/A
BAK1	#N/A	Bak1	Bak1		#N/A	#N/A	#N/A
BAMBI	#N/A	#N/A	#N/A		#N/A	#N/A	#N/A
BCAM	#N/A	#N/A	#N/A		#N/A	#N/A	#N/A
BCAP29	#N/A	#N/A	#N/A		#N/A	#N/A	#N/A
BCAP31	#N/A	#N/A	#N/A		#N/A	#N/A	#N/A
BCL2	#N/A	#N/A	#N/A		#N/A	#N/A	#N/A
BCL2L1	#N/A	#N/A	#N/A		#N/A	#N/A	#N/A
BCL2L10	#N/A	#N/A	#N/A		#N/A	#N/A	#N/A
BCL2L13	#N/A	#N/A	#N/A		#N/A	#N/A	#N/A
BCL2L2	#N/A	#N/A	#N/A		#N/A	#N/A	#N/A
BCS1L	#N/A	#N/A	#N/A		#N/A	#N/A	#N/A
BDKRB1	#N/A	#N/A	#N/A		#N/A	#N/A	#N/A
BDKRB2	#N/A	#N/A	#N/A		#N/A	#N/A	#N/A
BDNF	#N/A	#N/A	#N/A		#N/A	#N/A	#N/A
BEAN1	#N/A	#N/A	Bean1		#N/A	#N/A	#N/A
BEST1	#N/A	#N/A	#N/A		#N/A	#N/A	#N/A
BEST2	Best2	#N/A	#N/A		#N/A	#N/A	#N/A
BEST3	#N/A	#N/A	#N/A		#N/A	#N/A	#N/A
BEST4	#N/A	#N/A	#N/A		#N/A	#N/A	#N/A
BET1	#N/A	#N/A	#N/A		#N/A	#N/A	#N/A
BET1L	#N/A	#N/A	#N/A		#N/A	#N/A	#N/A
BFAR	#N/A	#N/A	#N/A		#N/A	#N/A	#N/A
BIK	#N/A	#N/A	#N/A		#N/A	#N/A	#N/A
BMPR1A	#N/A	#N/A	#N/A		#N/A	#N/A	#N/A
BMPR1B	#N/A	#N/A	#N/A		#N/A	Bmpr1b	Bmpr1b
BMPR2	#N/A	#N/A	#N/A		#N/A	#N/A	#N/A
BMT2	#N/A	#N/A	#N/A		#N/A	#N/A	#N/A
BNIP1	#N/A	#N/A	#N/A		#N/A	#N/A	#N/A
BNIP2	#N/A	#N/A	#N/A		#N/A	#N/A	#N/A
BNIP3	#N/A	#N/A	#N/A		#N/A	#N/A	#N/A
BNIP3L	#N/A	#N/A	#N/A		#N/A	#N/A	#N/A
BNIPL	#N/A	#N/A	#N/A		#N/A	#N/A	Bnipl
BOC	#N/A	#N/A	#N/A		#N/A	#N/A	#N/A
BOK	#N/A	Bok	Bok		#N/A	#N/A	#N/A
BRI3	#N/A	#N/A	#N/A		#N/A	#N/A	#N/A
BRI3BP	#N/A	#N/A	#N/A		#N/A	#N/A	#N/A
BRICD5	#N/A	#N/A	#N/A		#N/A	#N/A	#N/A
BRS3	#N/A	#N/A	#N/A		#N/A	#N/A	#N/A
BRSK1	#N/A	#N/A	#N/A		#N/A	#N/A	#N/A
BRSK2	#N/A	#N/A	#N/A		#N/A	#N/A	#N/A
BSCL2	#N/A	#N/A	#N/A		#N/A	#N/A	#N/A
BSG	#N/A	#N/A	#N/A		#N/A	#N/A	#N/A
BSND	#N/A	#N/A	#N/A		#N/A	#N/A	#N/A
BST2	#N/A	Bst2	Bst2		#N/A	#N/A	#N/A
BTC	Btc	Btc	Btc		#N/A	#N/A	#N/A
BTLA	#N/A	#N/A	#N/A		#N/A	#N/A	#N/A
BTN1A1	#N/A	#N/A	#N/A		#N/A	#N/A	#N/A
BTN2A1	#N/A	#N/A	#N/A		#N/A	#N/A	#N/A
BTN2A2	#N/A	#N/A	#N/A		#N/A	#N/A	#N/A
BTN3A1	#N/A	#N/A	#N/A		#N/A	#N/A	#N/A
BTN3A2	#N/A	#N/A	#N/A		#N/A	#N/A	#N/A
BTN3A3	#N/A	#N/A	#N/A		#N/A	#N/A	#N/A
BTNL2	#N/A	#N/A	#N/A		#N/A	#N/A	#N/A
BTNL3	#N/A	#N/A	#N/A		#N/A	#N/A	#N/A
BTNL8	#N/A	#N/A	#N/A		#N/A	#N/A	#N/A
BTNL9	#N/A	#N/A	#N/A		#N/A	#N/A	#N/A
BVES	#N/A	#N/A	#N/A		#N/A	#N/A	#N/A
BX255925.3	#N/A	#N/A	#N/A		#N/A	#N/A	#N/A
C10orf128	#N/A	#N/A	#N/A		#N/A	#N/A	#N/A
C11orf24	#N/A	#N/A	#N/A		#N/A	#N/A	#N/A
C11orf87	#N/A	#N/A	#N/A		#N/A	#N/A	#N/A
C12orf76	#N/A	#N/A	#N/A		#N/A	#N/A	#N/A
C14orf132	#N/A	#N/A	#N/A		#N/A	#N/A	#N/A
C14orf180	#N/A	#N/A	#N/A		#N/A	#N/A	#N/A
C14orf37	#N/A	#N/A	#N/A		#N/A	#N/A	#N/A
C16orf54	#N/A	#N/A	#N/A		#N/A	#N/A	#N/A
C16orf58	#N/A	#N/A	#N/A		#N/A	#N/A	#N/A
C16orf91	#N/A	#N/A	#N/A		#N/A	#N/A	#N/A
C16orf92	#N/A	#N/A	#N/A		#N/A	#N/A	#N/A
C17orf113	#N/A	#N/A	#N/A		#N/A	#N/A	#N/A
C17orf62	#N/A	#N/A	#N/A		#N/A	#N/A	#N/A
C17orf78	#N/A	#N/A	#N/A		#N/A	#N/A	#N/A
C17orf80	#N/A	#N/A	#N/A		#N/A	#N/A	#N/A
C18orf32	#N/A	#N/A	#N/A		#N/A	#N/A	#N/A
C19orf18	#N/A	#N/A	#N/A		#N/A	#N/A	#N/A
C19orf24	#N/A	#N/A	#N/A		#N/A	#N/A	#N/A
C19orf38	#N/A	#N/A	#N/A		#N/A	#N/A	#N/A
C1GALT1C1	#N/A	#N/A	#N/A		#N/A	#N/A	#N/A
C1GALT1C1L	#N/A	#N/A	#N/A		#N/A	#N/A	#N/A
C1orf159	#N/A	#N/A	#N/A		#N/A	#N/A	#N/A
C1orf162	#N/A	#N/A	#N/A		#N/A	#N/A	#N/A
C1orf185	#N/A	#N/A	#N/A		#N/A	#N/A	#N/A
C1orf210	#N/A	#N/A	#N/A		#N/A	#N/A	#N/A
C1orf43	#N/A	#N/A	#N/A		#N/A	#N/A	#N/A
C20orf141	#N/A	#N/A	#N/A		#N/A	#N/A	#N/A
C20orf24	#N/A	#N/A	#N/A		#N/A	#N/A	#N/A
C2CD2L	#N/A	#N/A	#N/A		#N/A	#N/A	#N/A
C2orf16	#N/A	#N/A	#N/A		#N/A	#N/A	#N/A
C2orf74	#N/A	#N/A	#N/A		#N/A	#N/A	#N/A
C2orf83	#N/A	#N/A	#N/A		#N/A	#N/A	#N/A
C2orf92	#N/A	#N/A	#N/A		#N/A	#N/A	#N/A
C3AR1	#N/A	#N/A	#N/A		#N/A	#N/A	#N/A
C3orf18	#N/A	#N/A	#N/A		#N/A	#N/A	#N/A
C3orf52	#N/A	#N/A	#N/A		#N/A	#N/A	#N/A
C3orf80	#N/A	#N/A	#N/A		#N/A	#N/A	#N/A
C4orf3	#N/A	#N/A	#N/A		#N/A	#N/A	#N/A
C5AR1	#N/A	#N/A	#N/A		#N/A	#N/A	#N/A
C5AR2	#N/A	#N/A	#N/A		#N/A	#N/A	#N/A
C5orf15	#N/A	#N/A	#N/A		#N/A	#N/A	#N/A
C5orf42	#N/A	#N/A	#N/A		#N/A	#N/A	#N/A
C5orf60	#N/A	#N/A	#N/A		#N/A	#N/A	#N/A
C6orf10	#N/A	#N/A	#N/A		#N/A	#N/A	#N/A
C6orf136	#N/A	#N/A	#N/A		#N/A	#N/A	#N/A
C6orf47	#N/A	#N/A	#N/A		#N/A	#N/A	#N/A
C6orf89	#N/A	#N/A	#N/A		#N/A	#N/A	#N/A
C9orf57	#N/A	#N/A	#N/A		#N/A	#N/A	#N/A
C9orf84	#N/A	#N/A	#N/A		#N/A	#N/A	#N/A
C9orf92	#N/A	#N/A	#N/A		#N/A	#N/A	#N/A
CA12	#N/A	#N/A	#N/A		#N/A	#N/A	#N/A
CA14	#N/A	#N/A	#N/A		#N/A	#N/A	#N/A
CA4	#N/A	#N/A	#N/A		#N/A	#N/A	#N/A
CA9	#N/A	#N/A	#N/A		#N/A	#N/A	#N/A
CABLES2	#N/A	#N/A	#N/A		#N/A	#N/A	#N/A
CABP7	#N/A	#N/A	#N/A		#N/A	#N/A	#N/A
CACFD1	#N/A	#N/A	#N/A		#N/A	#N/A	#N/A
CACHD1	#N/A	#N/A	#N/A		#N/A	#N/A	#N/A
CACNA1A	#N/A	#N/A	#N/A		#N/A	#N/A	#N/A
CACNA1B	#N/A	Cacna1b	Cacna1b		#N/A	#N/A	#N/A
CACNA1C	#N/A	#N/A	#N/A		Cacna1c	#N/A	#N/A
CACNA1D	#N/A	#N/A	#N/A		#N/A	#N/A	#N/A
CACNA1E	#N/A	#N/A	#N/A		#N/A	#N/A	#N/A
CACNA1F	#N/A	#N/A	#N/A		#N/A	#N/A	#N/A
CACNA1G	#N/A	#N/A	#N/A		#N/A	#N/A	#N/A
CACNA1H	#N/A	#N/A	#N/A		#N/A	#N/A	#N/A
CACNA1I	#N/A	#N/A	#N/A		#N/A	Cacna1i	Cacna1i
CACNA1S	#N/A	#N/A	#N/A		#N/A	#N/A	#N/A
CACNA2D1	#N/A	#N/A	#N/A		#N/A	#N/A	#N/A
CACNA2D3	#N/A	#N/A	#N/A		#N/A	#N/A	#N/A
CACNA2D4	Cacna2d4	Cacna2d4	Cacna2d4		#N/A	#N/A	#N/A
CACNB4	#N/A	#N/A	#N/A		#N/A	Cacnb4	Cacnb4
CACNG1	#N/A	#N/A	#N/A		#N/A	#N/A	#N/A
CACNG2	#N/A	#N/A	#N/A		#N/A	#N/A	#N/A
CACNG3	#N/A	#N/A	#N/A		#N/A	#N/A	#N/A
CACNG4	#N/A	#N/A	#N/A		#N/A	#N/A	#N/A
CACNG5	#N/A	#N/A	#N/A		#N/A	#N/A	#N/A
CACNG6	#N/A	#N/A	#N/A		#N/A	#N/A	#N/A
CACNG7	#N/A	#N/A	#N/A		#N/A	#N/A	#N/A
CACNG8	#N/A	#N/A	#N/A		#N/A	#N/A	#N/A
CADM1	#N/A	#N/A	#N/A		#N/A	#N/A	#N/A
CADM2	#N/A	#N/A	#N/A		#N/A	#N/A	#N/A
CADM3	#N/A	#N/A	#N/A		#N/A	#N/A	#N/A
CADM4	#N/A	#N/A	#N/A		#N/A	#N/A	#N/A
CALCR	#N/A	#N/A	#N/A		#N/A	#N/A	#N/A
CALCRL	#N/A	#N/A	#N/A		#N/A	#N/A	#N/A
CALHM1	#N/A	#N/A	#N/A		#N/A	#N/A	#N/A
CALHM2	#N/A	#N/A	#N/A		#N/A	#N/A	#N/A
CALHM3	#N/A	#N/A	#N/A		#N/A	#N/A	#N/A
CALHM4	#N/A	#N/A	#N/A		#N/A	#N/A	#N/A
CALHM5	#N/A	#N/A	#N/A		#N/A	#N/A	#N/A
CALHM6	#N/A	#N/A	#N/A		#N/A	#N/A	#N/A
CALN1	#N/A	#N/A	#N/A		Caln1	Caln1	Caln1
CALY	#N/A	#N/A	#N/A		#N/A	#N/A	#N/A
CAMK1	#N/A	#N/A	#N/A		#N/A	#N/A	#N/A
CAMK1D	#N/A	#N/A	#N/A		#N/A	#N/A	Camk1d
CAMK1G	#N/A	#N/A	#N/A		#N/A	#N/A	#N/A
CAMK2A	#N/A	#N/A	#N/A		#N/A	#N/A	#N/A
CAMK2B	#N/A	#N/A	#N/A		#N/A	#N/A	#N/A
CAMK2D	#N/A	#N/A	#N/A		#N/A	#N/A	#N/A
CAMK2G	#N/A	#N/A	#N/A		#N/A	#N/A	#N/A
CAMK4	#N/A	#N/A	#N/A		#N/A	#N/A	#N/A
CAMKK2	#N/A	#N/A	#N/A		#N/A	#N/A	#N/A
CAMLG	#N/A	#N/A	#N/A		#N/A	#N/A	#N/A
CANT1	#N/A	#N/A	#N/A		#N/A	#N/A	#N/A
CANX	#N/A	#N/A	#N/A		#N/A	#N/A	#N/A
CARD19	#N/A	#N/A	#N/A		#N/A	#N/A	#N/A
CASD1	#N/A	#N/A	#N/A		#N/A	#N/A	#N/A
CASK	#N/A	#N/A	#N/A		#N/A	#N/A	#N/A
CASR	#N/A	#N/A	#N/A		#N/A	#N/A	#N/A
CATSPER1	#N/A	#N/A	#N/A		#N/A	#N/A	#N/A
CATSPER2	#N/A	#N/A	#N/A		#N/A	#N/A	#N/A
CATSPER3	#N/A	#N/A	#N/A		#N/A	#N/A	#N/A
CATSPER4	#N/A	#N/A	#N/A		#N/A	#N/A	#N/A
CATSPERB	#N/A	#N/A	#N/A		#N/A	#N/A	#N/A
CATSPERD	#N/A	#N/A	#N/A		#N/A	#N/A	Catsperd
CATSPERE	#N/A	#N/A	#N/A		#N/A	#N/A	#N/A
CATSPERG	#N/A	#N/A	#N/A		#N/A	#N/A	#N/A
CAV1	#N/A	#N/A	#N/A		Cav1	Cav1	#N/A
CAV2	#N/A	#N/A	#N/A		#N/A	#N/A	#N/A
CAV3	#N/A	#N/A	#N/A		#N/A	#N/A	#N/A
CBARP	#N/A	#N/A	#N/A		#N/A	#N/A	#N/A
CCDC107	#N/A	#N/A	#N/A		#N/A	#N/A	#N/A
CCDC136	#N/A	#N/A	#N/A		#N/A	#N/A	#N/A
CCDC141	#N/A	#N/A	#N/A		#N/A	#N/A	#N/A
CCDC144A	#N/A	#N/A	#N/A		#N/A	#N/A	#N/A
CCDC155	#N/A	#N/A	#N/A		#N/A	#N/A	#N/A
CCDC163	#N/A	#N/A	#N/A		#N/A	#N/A	#N/A
CCDC167	#N/A	#N/A	#N/A		#N/A	#N/A	#N/A
CCDC168	#N/A	#N/A	#N/A		#N/A	#N/A	#N/A
CCDC188	#N/A	#N/A	#N/A		#N/A	#N/A	#N/A
CCDC47	#N/A	#N/A	#N/A		#N/A	#N/A	#N/A
CCDC51	#N/A	#N/A	#N/A		#N/A	#N/A	#N/A
CCDC90B	#N/A	#N/A	#N/A		#N/A	#N/A	#N/A
CCKAR	#N/A	#N/A	#N/A		#N/A	Cckar	#N/A
CCKBR	#N/A	#N/A	#N/A		#N/A	#N/A	#N/A
CCL5	#N/A	#N/A	#N/A		#N/A	#N/A	#N/A
CCL7	#N/A	#N/A	Ccl7		#N/A	#N/A	#N/A
CCPG1	#N/A	#N/A	#N/A		#N/A	#N/A	#N/A
CCR1	#N/A	Ccr1	Ccr1		#N/A	#N/A	#N/A
CCR10	#N/A	#N/A	#N/A		#N/A	#N/A	#N/A
CCR2	#N/A	#N/A	#N/A		#N/A	#N/A	#N/A
CCR3	#N/A	#N/A	#N/A		#N/A	#N/A	#N/A
CCR4	#N/A	#N/A	#N/A		#N/A	#N/A	#N/A
CCR5	#N/A	Ccr5	Ccr5		#N/A	#N/A	#N/A
CCR6	#N/A	#N/A	#N/A		#N/A	#N/A	#N/A
CCR7	#N/A	#N/A	#N/A		#N/A	#N/A	#N/A
CCR8	#N/A	#N/A	#N/A		#N/A	#N/A	#N/A
CCR9	#N/A	#N/A	#N/A		#N/A	#N/A	#N/A
CCRL2	#N/A	#N/A	#N/A		#N/A	#N/A	#N/A
CD101	#N/A	#N/A	#N/A		#N/A	#N/A	#N/A
CD109	#N/A	#N/A	#N/A		#N/A	#N/A	#N/A
CD151	#N/A	#N/A	#N/A		#N/A	#N/A	#N/A
CD163	#N/A	#N/A	#N/A		#N/A	#N/A	Cd163
CD163L1	#N/A	#N/A	#N/A		#N/A	#N/A	#N/A
CD164	#N/A	#N/A	#N/A		#N/A	#N/A	#N/A
CD164L2	#N/A	#N/A	#N/A		#N/A	Cd164l2	Cd164l2
CD180	#N/A	#N/A	#N/A		#N/A	#N/A	#N/A
CD19	#N/A	#N/A	#N/A		#N/A	#N/A	#N/A
CD1A	#N/A	#N/A	#N/A		#N/A	#N/A	#N/A
CD1B	#N/A	#N/A	#N/A		#N/A	#N/A	#N/A
CD1C	#N/A	#N/A	#N/A		#N/A	#N/A	#N/A
CD1D	#N/A	#N/A	#N/A		#N/A	#N/A	#N/A
CD1E	#N/A	#N/A	#N/A		#N/A	#N/A	#N/A
CD2	#N/A	#N/A	#N/A		#N/A	#N/A	#N/A
CD200	#N/A	#N/A	#N/A		#N/A	#N/A	#N/A
CD200R1	Cd200r1	Cd200r1	Cd200r1		#N/A	#N/A	#N/A
CD200R1L	#N/A	#N/A	#N/A		#N/A	#N/A	#N/A
CD207	#N/A	#N/A	#N/A		#N/A	#N/A	#N/A
CD209	#N/A	#N/A	#N/A		#N/A	#N/A	#N/A
CD22	#N/A	#N/A	#N/A		#N/A	#N/A	#N/A
CD226	#N/A	#N/A	#N/A		#N/A	#N/A	#N/A
CD244	#N/A	#N/A	Cd244		#N/A	#N/A	#N/A
CD247	#N/A	#N/A	#N/A		#N/A	#N/A	#N/A
CD248	#N/A	#N/A	#N/A		#N/A	#N/A	#N/A
CD27	#N/A	#N/A	#N/A		#N/A	#N/A	#N/A
CD274	#N/A	#N/A	#N/A		#N/A	#N/A	#N/A
CD276	#N/A	Cd276	Cd276		#N/A	#N/A	#N/A
CD28	#N/A	#N/A	#N/A		#N/A	Cd28	#N/A
CD300A	#N/A	#N/A	#N/A		#N/A	#N/A	#N/A
CD300C	#N/A	#N/A	#N/A		#N/A	#N/A	#N/A
CD300E	#N/A	#N/A	#N/A		#N/A	#N/A	#N/A
CD300LB	#N/A	#N/A	#N/A		#N/A	#N/A	#N/A
CD300LD	#N/A	#N/A	#N/A		#N/A	#N/A	#N/A
CD300LF	#N/A	#N/A	#N/A		#N/A	#N/A	#N/A
CD300LG	#N/A	#N/A	#N/A		#N/A	#N/A	#N/A
CD302	#N/A	#N/A	#N/A		#N/A	#N/A	#N/A
CD320	#N/A	#N/A	#N/A		#N/A	#N/A	#N/A
CD33	#N/A	#N/A	#N/A		#N/A	#N/A	#N/A
CD34	#N/A	#N/A	#N/A		#N/A	#N/A	#N/A
CD36	#N/A	#N/A	#N/A		#N/A	#N/A	#N/A
CD37	#N/A	#N/A	#N/A		#N/A	#N/A	#N/A
CD3D	#N/A	#N/A	#N/A		#N/A	#N/A	#N/A
CD3E	#N/A	#N/A	#N/A		#N/A	#N/A	#N/A
CD3G	#N/A	#N/A	#N/A		#N/A	#N/A	#N/A
CD4	#N/A	#N/A	#N/A		#N/A	#N/A	#N/A
CD40	#N/A	#N/A	#N/A		#N/A	#N/A	#N/A
CD40LG	#N/A	#N/A	#N/A		#N/A	#N/A	#N/A
CD44	Cd44	Cd44	Cd44		#N/A	#N/A	#N/A
CD46	#N/A	#N/A	#N/A		#N/A	#N/A	#N/A
CD47	#N/A	#N/A	#N/A		#N/A	#N/A	#N/A
CD48	#N/A	#N/A	#N/A		#N/A	#N/A	#N/A
CD5	#N/A	#N/A	#N/A		#N/A	#N/A	#N/A
CD52	#N/A	#N/A	Cd52		#N/A	#N/A	#N/A
CD53	#N/A	#N/A	#N/A		#N/A	#N/A	#N/A
CD55	#N/A	#N/A	#N/A		#N/A	#N/A	#N/A
CD58	#N/A	#N/A	#N/A		#N/A	#N/A	#N/A
CD59	#N/A	#N/A	#N/A		#N/A	#N/A	#N/A
CD6	#N/A	#N/A	#N/A		#N/A	#N/A	#N/A
CD63	#N/A	#N/A	#N/A		#N/A	#N/A	#N/A
CD68	#N/A	#N/A	#N/A		#N/A	#N/A	#N/A
CD69	#N/A	#N/A	Cd69		#N/A	#N/A	#N/A
CD7	#N/A	#N/A	#N/A		#N/A	#N/A	#N/A
CD70	#N/A	#N/A	#N/A		#N/A	#N/A	#N/A
CD72	#N/A	Cd72	Cd72		#N/A	#N/A	#N/A
CD74	#N/A	Cd74	#N/A		#N/A	#N/A	#N/A
CD79A	#N/A	#N/A	#N/A		#N/A	#N/A	#N/A
CD79B	#N/A	#N/A	#N/A		#N/A	#N/A	#N/A
CD80	#N/A	#N/A	#N/A		#N/A	#N/A	#N/A
CD81	#N/A	#N/A	#N/A		#N/A	#N/A	#N/A
CD82	#N/A	#N/A	#N/A		#N/A	#N/A	#N/A
CD83	#N/A	#N/A	#N/A		#N/A	#N/A	#N/A
CD84	#N/A	#N/A	#N/A		#N/A	#N/A	#N/A
CD86	#N/A	Cd86	#N/A		#N/A	#N/A	#N/A
CD8A	#N/A	#N/A	#N/A		#N/A	#N/A	#N/A
CD8B	#N/A	#N/A	#N/A		#N/A	#N/A	#N/A
CD8B2	#N/A	#N/A	#N/A		#N/A	#N/A	#N/A
CD9	#N/A	#N/A	#N/A		#N/A	#N/A	#N/A
CD93	#N/A	#N/A	#N/A		#N/A	#N/A	#N/A
CD96	#N/A	#N/A	#N/A		#N/A	#N/A	#N/A
CD99	#N/A	#N/A	#N/A		#N/A	#N/A	#N/A
CD99L2	#N/A	#N/A	#N/A		#N/A	#N/A	#N/A
CDAN1	#N/A	#N/A	#N/A		#N/A	#N/A	#N/A
CDC14B	#N/A	#N/A	#N/A		#N/A	#N/A	#N/A
CDCP1	#N/A	#N/A	#N/A		#N/A	#N/A	#N/A
CDCP2	#N/A	#N/A	#N/A		#N/A	#N/A	#N/A
CDH1	Cdh1	Cdh1	#N/A		#N/A	#N/A	#N/A
CDH10	#N/A	#N/A	#N/A		#N/A	#N/A	#N/A
CDH11	#N/A	#N/A	#N/A		#N/A	#N/A	#N/A
CDH12	#N/A	#N/A	#N/A		#N/A	#N/A	#N/A
CDH15	#N/A	#N/A	#N/A		#N/A	#N/A	#N/A
CDH16	#N/A	#N/A	#N/A		#N/A	#N/A	#N/A
CDH17	#N/A	Cdh17	Cdh17		#N/A	#N/A	#N/A
CDH18	#N/A	#N/A	#N/A		#N/A	#N/A	#N/A
CDH19	#N/A	#N/A	#N/A		Cdh19	Cdh19	#N/A
CDH2	#N/A	#N/A	#N/A		#N/A	#N/A	#N/A
CDH20	#N/A	#N/A	#N/A		Cdh20	Cdh20	Cdh20
CDH22	#N/A	#N/A	#N/A		#N/A	#N/A	#N/A
CDH23	#N/A	#N/A	#N/A		#N/A	#N/A	#N/A
CDH24	#N/A	Cdh24	Cdh24		#N/A	#N/A	#N/A
CDH26	#N/A	#N/A	#N/A		#N/A	#N/A	#N/A
CDH3	#N/A	#N/A	#N/A		#N/A	#N/A	#N/A
CDH4	#N/A	#N/A	#N/A		#N/A	#N/A	#N/A
CDH5	#N/A	#N/A	#N/A		#N/A	#N/A	#N/A
CDH6	#N/A	#N/A	#N/A		#N/A	#N/A	#N/A
CDH7	#N/A	#N/A	#N/A		#N/A	#N/A	#N/A
CDH8	#N/A	#N/A	#N/A		Cdh8	Cdh8	Cdh8
CDH9	#N/A	#N/A	#N/A		#N/A	#N/A	#N/A
CDHR1	Cdhr1	Cdhr1	Cdhr1		#N/A	#N/A	#N/A
CDHR2	#N/A	Cdhr2	Cdhr2		#N/A	#N/A	#N/A
CDHR3	#N/A	#N/A	#N/A		#N/A	#N/A	#N/A
CDHR4	#N/A	#N/A	#N/A		#N/A	#N/A	#N/A
CDHR5	#N/A	#N/A	#N/A		#N/A	#N/A	#N/A
CDIP1	#N/A	#N/A	#N/A		#N/A	#N/A	#N/A
CDIPT	#N/A	#N/A	#N/A		#N/A	#N/A	#N/A
CDKAL1	#N/A	#N/A	#N/A		#N/A	#N/A	#N/A
CDON	#N/A	#N/A	#N/A		#N/A	#N/A	#N/A
CDRT15L2	#N/A	#N/A	#N/A		#N/A	#N/A	#N/A
CDS1	#N/A	#N/A	#N/A		#N/A	#N/A	#N/A
CDS2	#N/A	#N/A	#N/A		#N/A	#N/A	#N/A
CEACAM1	#N/A	#N/A	#N/A		#N/A	#N/A	#N/A
CEACAM19	#N/A	#N/A	#N/A		#N/A	#N/A	#N/A
CEACAM20	#N/A	#N/A	#N/A		#N/A	#N/A	#N/A
CEACAM21	#N/A	#N/A	#N/A		#N/A	#N/A	#N/A
CEACAM3	#N/A	#N/A	#N/A		#N/A	#N/A	#N/A
CEACAM4	#N/A	#N/A	#N/A		#N/A	#N/A	#N/A
CEACAM6	#N/A	#N/A	#N/A		#N/A	#N/A	#N/A
CEACAM7	#N/A	#N/A	#N/A		#N/A	#N/A	#N/A
CEBPZOS	#N/A	#N/A	#N/A		#N/A	#N/A	#N/A
CELSR1	Celsr1	Celsr1	Celsr1		#N/A	#N/A	#N/A
CELSR2	#N/A	#N/A	#N/A		#N/A	#N/A	#N/A
CELSR3	#N/A	#N/A	Celsr3		#N/A	#N/A	#N/A
CEND1	#N/A	#N/A	#N/A		#N/A	#N/A	#N/A
CEP170	#N/A	#N/A	#N/A		#N/A	#N/A	#N/A
CEP95	#N/A	#N/A	#N/A		#N/A	#N/A	#N/A
CEPT1	#N/A	#N/A	#N/A		#N/A	#N/A	#N/A
CERS1	#N/A	#N/A	#N/A		#N/A	#N/A	#N/A
CERS2	#N/A	#N/A	#N/A		#N/A	#N/A	#N/A
CERS3	Cers3	Cers3	#N/A		#N/A	#N/A	#N/A
CERS4	#N/A	#N/A	#N/A		#N/A	Cers4	#N/A
CERS5	#N/A	#N/A	#N/A		#N/A	#N/A	#N/A
CERS6	#N/A	#N/A	#N/A		#N/A	#N/A	#N/A
CES2	#N/A	#N/A	#N/A		#N/A	#N/A	#N/A
CFAP46	#N/A	#N/A	#N/A		#N/A	#N/A	#N/A
CFAP47	#N/A	#N/A	#N/A		#N/A	#N/A	#N/A
CFAP54	#N/A	#N/A	#N/A		#N/A	#N/A	#N/A
CFAP57	#N/A	#N/A	#N/A		#N/A	#N/A	#N/A
CFAP61	#N/A	#N/A	#N/A		#N/A	#N/A	#N/A
CFTR	Cftr	Cftr	Cftr		#N/A	#N/A	#N/A
CGRRF1	#N/A	#N/A	#N/A		#N/A	#N/A	#N/A
CH25H	#N/A	Ch25h	Ch25h		#N/A	#N/A	#N/A
CHEK2	#N/A	#N/A	#N/A		#N/A	#N/A	#N/A
CHIC1	#N/A	#N/A	#N/A		#N/A	#N/A	#N/A
CHIC2	#N/A	#N/A	#N/A		#N/A	#N/A	#N/A
CHL1	Chl1	Chl1	Chl1		#N/A	#N/A	#N/A
CHML	#N/A	#N/A	#N/A		#N/A	#N/A	#N/A
CHODL	#N/A	#N/A	#N/A		#N/A	#N/A	#N/A
CHPT1	#N/A	#N/A	#N/A		#N/A	Chpt1	#N/A
CHRFAM7A	#N/A	#N/A	#N/A		#N/A	#N/A	#N/A
CHRM1	#N/A	#N/A	#N/A		#N/A	#N/A	Chrm1
CHRM2	#N/A	#N/A	#N/A		#N/A	#N/A	#N/A
CHRM3	#N/A	#N/A	#N/A		#N/A	Chrm3	Chrm3
CHRM4	#N/A	#N/A	#N/A		#N/A	#N/A	#N/A
CHRM5	#N/A	#N/A	#N/A		#N/A	#N/A	#N/A
CHRNA1	#N/A	#N/A	#N/A		#N/A	#N/A	#N/A
CHRNA10	#N/A	#N/A	#N/A		#N/A	#N/A	#N/A
CHRNA2	#N/A	#N/A	#N/A		#N/A	#N/A	#N/A
CHRNA3	#N/A	#N/A	#N/A		#N/A	#N/A	#N/A
CHRNA4	#N/A	#N/A	#N/A		#N/A	#N/A	#N/A
CHRNA5	#N/A	#N/A	#N/A		#N/A	#N/A	#N/A
CHRNA6	#N/A	#N/A	#N/A		#N/A	#N/A	#N/A
CHRNA7	#N/A	#N/A	#N/A		#N/A	#N/A	#N/A
CHRNA9	#N/A	#N/A	#N/A		#N/A	#N/A	#N/A
CHRNB1	#N/A	Chrnb1	Chrnb1		#N/A	#N/A	#N/A
CHRNB2	#N/A	#N/A	#N/A		#N/A	#N/A	#N/A
CHRNB3	#N/A	#N/A	#N/A		#N/A	#N/A	Chrnb3
CHRNB4	#N/A	#N/A	#N/A		#N/A	#N/A	#N/A
CHRND	#N/A	#N/A	#N/A		#N/A	#N/A	#N/A
CHRNE	#N/A	#N/A	#N/A		#N/A	#N/A	#N/A
CHRNG	#N/A	#N/A	#N/A		#N/A	#N/A	#N/A
CHST10	#N/A	#N/A	#N/A		#N/A	#N/A	#N/A
CHST12	#N/A	#N/A	#N/A		#N/A	#N/A	#N/A
CHST14	#N/A	#N/A	#N/A		#N/A	#N/A	#N/A
CHST15	#N/A	#N/A	#N/A		#N/A	#N/A	#N/A
CHST2	#N/A	#N/A	#N/A		#N/A	#N/A	#N/A
CHST3	#N/A	#N/A	#N/A		#N/A	#N/A	#N/A
CHST5	#N/A	#N/A	#N/A		#N/A	#N/A	#N/A
CHST9	#N/A	Chst9	#N/A		#N/A	#N/A	#N/A
CIP2A	#N/A	#N/A	#N/A		#N/A	#N/A	#N/A
CISD1	#N/A	#N/A	#N/A		#N/A	#N/A	#N/A
CISD2	#N/A	#N/A	#N/A		#N/A	#N/A	#N/A
CKAP4	#N/A	#N/A	#N/A		#N/A	#N/A	#N/A
CKLF	#N/A	#N/A	#N/A		#N/A	#N/A	#N/A
CKLF-CMTM1	#N/A	#N/A	#N/A		#N/A	#N/A	#N/A
CLCA2	#N/A	Clca2	#N/A		#N/A	#N/A	#N/A
CLCA4	#N/A	Clca4	Clca4		#N/A	#N/A	#N/A
CLCC1	#N/A	#N/A	#N/A		#N/A	#N/A	#N/A
CLCN1	#N/A	#N/A	#N/A		#N/A	#N/A	#N/A
CLCN2	#N/A	Clcn2	#N/A		#N/A	#N/A	#N/A
CLCN3	#N/A	#N/A	#N/A		#N/A	#N/A	#N/A
CLCN4	#N/A	#N/A	#N/A		#N/A	#N/A	#N/A
CLCN5	#N/A	#N/A	#N/A		#N/A	#N/A	#N/A
CLCN6	#N/A	#N/A	#N/A		#N/A	#N/A	#N/A
CLCN7	#N/A	#N/A	#N/A		#N/A	#N/A	#N/A
CLCNKA	#N/A	#N/A	#N/A		#N/A	#N/A	#N/A
CLCNKB	#N/A	#N/A	#N/A		#N/A	#N/A	#N/A
CLDN1	#N/A	#N/A	#N/A		#N/A	#N/A	#N/A
CLDN10	#N/A	#N/A	#N/A		#N/A	Cldn10	#N/A
CLDN11	#N/A	#N/A	#N/A		#N/A	#N/A	#N/A
CLDN12	#N/A	#N/A	#N/A		#N/A	#N/A	#N/A
CLDN14	#N/A	#N/A	#N/A		#N/A	#N/A	#N/A
CLDN15	#N/A	#N/A	#N/A		#N/A	#N/A	#N/A
CLDN16	#N/A	#N/A	#N/A		#N/A	#N/A	#N/A
CLDN17	#N/A	#N/A	#N/A		#N/A	#N/A	#N/A
CLDN18	#N/A	#N/A	#N/A		#N/A	#N/A	#N/A
CLDN19	#N/A	#N/A	#N/A		#N/A	#N/A	#N/A
CLDN2	#N/A	Cldn2	Cldn2		#N/A	#N/A	#N/A
CLDN20	#N/A	#N/A	#N/A		#N/A	#N/A	#N/A
CLDN22	#N/A	#N/A	#N/A		#N/A	#N/A	#N/A
CLDN23	#N/A	#N/A	#N/A		#N/A	#N/A	#N/A
CLDN24	#N/A	#N/A	#N/A		#N/A	#N/A	#N/A
CLDN25	#N/A	#N/A	#N/A		#N/A	#N/A	#N/A
CLDN3	#N/A	#N/A	#N/A		#N/A	#N/A	#N/A
CLDN34	#N/A	#N/A	#N/A		#N/A	#N/A	#N/A
CLDN4	#N/A	#N/A	#N/A		#N/A	#N/A	#N/A
CLDN5	#N/A	#N/A	#N/A		#N/A	#N/A	#N/A
CLDN6	#N/A	#N/A	#N/A		#N/A	#N/A	#N/A
CLDN7	#N/A	Cldn7	#N/A		#N/A	#N/A	#N/A
CLDN8	#N/A	#N/A	#N/A		#N/A	#N/A	#N/A
CLDN9	#N/A	#N/A	#N/A		#N/A	#N/A	#N/A
CLDND1	#N/A	#N/A	#N/A		#N/A	#N/A	#N/A
CLDND2	#N/A	#N/A	#N/A		#N/A	#N/A	#N/A
CLEC10A	#N/A	#N/A	#N/A		#N/A	#N/A	#N/A
CLEC12A	#N/A	#N/A	#N/A		#N/A	#N/A	#N/A
CLEC12B	#N/A	#N/A	#N/A		#N/A	#N/A	#N/A
CLEC14A	#N/A	#N/A	#N/A		#N/A	#N/A	#N/A
CLEC17A	#N/A	#N/A	#N/A		#N/A	#N/A	#N/A
CLEC1A	#N/A	#N/A	#N/A		#N/A	#N/A	#N/A
CLEC1B	#N/A	#N/A	#N/A		#N/A	#N/A	#N/A
CLEC2A	#N/A	#N/A	#N/A		#N/A	#N/A	#N/A
CLEC2D	#N/A	#N/A	#N/A		#N/A	#N/A	#N/A
CLEC2L	#N/A	#N/A	#N/A		#N/A	#N/A	#N/A
CLEC4A	#N/A	#N/A	#N/A		#N/A	#N/A	#N/A
CLEC4C	#N/A	#N/A	#N/A		#N/A	#N/A	#N/A
CLEC4E	#N/A	Clec4e	Clec4e		#N/A	#N/A	#N/A
CLEC4F	#N/A	#N/A	#N/A		#N/A	#N/A	#N/A
CLEC4G	#N/A	#N/A	#N/A		#N/A	#N/A	#N/A
CLEC4M	#N/A	#N/A	#N/A		#N/A	#N/A	#N/A
CLEC5A	Clec5a	Clec5a	Clec5a		#N/A	#N/A	#N/A
CLEC6A	#N/A	#N/A	#N/A		#N/A	#N/A	#N/A
CLEC7A	#N/A	#N/A	#N/A		#N/A	#N/A	#N/A
CLEC9A	#N/A	#N/A	#N/A		#N/A	#N/A	#N/A
CLECL1	#N/A	#N/A	#N/A		#N/A	#N/A	#N/A
CLGN	#N/A	#N/A	#N/A		#N/A	#N/A	#N/A
CLK1	#N/A	#N/A	#N/A		#N/A	#N/A	#N/A
CLK4	#N/A	#N/A	#N/A		#N/A	#N/A	#N/A
CLMN	#N/A	#N/A	#N/A		#N/A	#N/A	#N/A
CLMP	#N/A	#N/A	#N/A		#N/A	#N/A	#N/A
CLN3	#N/A	#N/A	#N/A		#N/A	#N/A	#N/A
CLN5	#N/A	#N/A	#N/A		#N/A	#N/A	#N/A
CLN6	#N/A	#N/A	#N/A		#N/A	#N/A	#N/A
CLN8	#N/A	#N/A	#N/A		#N/A	#N/A	#N/A
CLPTM1	#N/A	#N/A	#N/A		#N/A	#N/A	#N/A
CLPTM1L	#N/A	#N/A	#N/A		#N/A	#N/A	#N/A
CLRN1	#N/A	#N/A	#N/A		#N/A	#N/A	#N/A
CLRN2	#N/A	#N/A	#N/A		#N/A	#N/A	#N/A
CLRN3	#N/A	Clrn3	Clrn3		#N/A	#N/A	#N/A
CLSTN1	#N/A	#N/A	#N/A		#N/A	#N/A	#N/A
CLSTN2	#N/A	#N/A	#N/A		Clstn2	Clstn2	#N/A
CLSTN3	#N/A	#N/A	#N/A		#N/A	#N/A	#N/A
CLTRN	#N/A	#N/A	#N/A		#N/A	#N/A	#N/A
CLYBL	#N/A	#N/A	#N/A		#N/A	#N/A	#N/A
CMKLR1	#N/A	#N/A	#N/A		#N/A	#N/A	#N/A
CMTM1	#N/A	#N/A	#N/A		#N/A	#N/A	#N/A
CMTM2	#N/A	#N/A	#N/A		#N/A	#N/A	#N/A
CMTM3	#N/A	#N/A	#N/A		#N/A	#N/A	#N/A
CMTM4	#N/A	#N/A	#N/A		#N/A	#N/A	#N/A
CMTM5	#N/A	#N/A	#N/A		#N/A	#N/A	#N/A
CMTM6	#N/A	#N/A	#N/A		#N/A	#N/A	#N/A
CMTM7	#N/A	#N/A	#N/A		#N/A	#N/A	#N/A
CMTM8	#N/A	#N/A	#N/A		#N/A	#N/A	#N/A
CMTR2	#N/A	#N/A	#N/A		#N/A	#N/A	#N/A
CNEP1R1	#N/A	#N/A	#N/A		#N/A	#N/A	#N/A
CNGA1	#N/A	#N/A	#N/A		#N/A	#N/A	#N/A
CNGA2	#N/A	#N/A	#N/A		#N/A	#N/A	#N/A
CNGA3	#N/A	#N/A	#N/A		#N/A	#N/A	#N/A
CNGA4	#N/A	#N/A	#N/A		#N/A	#N/A	#N/A
CNGB1	#N/A	#N/A	#N/A		#N/A	#N/A	#N/A
CNGB3	#N/A	#N/A	#N/A		#N/A	#N/A	#N/A
CNIH1	#N/A	#N/A	#N/A		#N/A	#N/A	#N/A
CNIH2	#N/A	#N/A	#N/A		#N/A	#N/A	#N/A
CNIH3	#N/A	#N/A	#N/A		#N/A	#N/A	#N/A
CNIH4	#N/A	#N/A	#N/A		#N/A	#N/A	#N/A
CNMD	#N/A	#N/A	#N/A		#N/A	#N/A	#N/A
CNNM1	#N/A	#N/A	#N/A		#N/A	#N/A	#N/A
CNNM2	#N/A	#N/A	#N/A		#N/A	#N/A	#N/A
CNNM3	#N/A	#N/A	#N/A		#N/A	#N/A	#N/A
CNNM4	#N/A	#N/A	#N/A		#N/A	#N/A	#N/A
CNOT1	#N/A	#N/A	#N/A		#N/A	#N/A	#N/A
CNPPD1	#N/A	#N/A	#N/A		#N/A	#N/A	#N/A
CNR1	#N/A	#N/A	#N/A		#N/A	#N/A	#N/A
CNR2	#N/A	#N/A	#N/A		#N/A	#N/A	#N/A
CNST	#N/A	#N/A	#N/A		#N/A	#N/A	#N/A
CNTD1	#N/A	#N/A	#N/A		#N/A	#N/A	#N/A
CNTFR	#N/A	Cntfr	Cntfr		#N/A	#N/A	#N/A
CNTN6	#N/A	#N/A	#N/A		#N/A	#N/A	#N/A
CNTNAP1	#N/A	#N/A	#N/A		#N/A	#N/A	#N/A
CNTNAP2	#N/A	#N/A	#N/A		#N/A	Cntnap2	Cntnap2
CNTNAP3	#N/A	#N/A	#N/A		#N/A	#N/A	#N/A
CNTNAP3B	#N/A	#N/A	#N/A		#N/A	#N/A	#N/A
CNTNAP4	#N/A	#N/A	#N/A		#N/A	#N/A	#N/A
CNTNAP5	#N/A	#N/A	#N/A		#N/A	#N/A	#N/A
COA1	#N/A	#N/A	#N/A		#N/A	#N/A	#N/A
COA3	#N/A	#N/A	#N/A		#N/A	#N/A	#N/A
COL13A1	#N/A	#N/A	#N/A		#N/A	#N/A	#N/A
COL17A1	#N/A	Col17a1	#N/A		#N/A	#N/A	#N/A
COL25A1	Col25a1	Col25a1	Col25a1		#N/A	#N/A	#N/A
COLEC12	#N/A	#N/A	#N/A		#N/A	#N/A	#N/A
COMT	#N/A	#N/A	#N/A		#N/A	#N/A	#N/A
COQ2	#N/A	#N/A	#N/A		#N/A	#N/A	#N/A
COQ7	#N/A	#N/A	#N/A		#N/A	#N/A	#N/A
CORIN	#N/A	#N/A	#N/A		#N/A	#N/A	#N/A
COX10	#N/A	#N/A	#N/A		#N/A	#N/A	#N/A
COX11	#N/A	#N/A	#N/A		#N/A	#N/A	#N/A
COX14	#N/A	#N/A	#N/A		#N/A	#N/A	#N/A
COX15	#N/A	#N/A	#N/A		#N/A	#N/A	#N/A
COX18	#N/A	#N/A	#N/A		#N/A	#N/A	#N/A
COX20	#N/A	#N/A	#N/A		#N/A	#N/A	#N/A
COX4I1	#N/A	#N/A	#N/A		#N/A	#N/A	#N/A
COX4I2	#N/A	#N/A	#N/A		#N/A	#N/A	#N/A
COX6A1	#N/A	#N/A	#N/A		#N/A	#N/A	#N/A
COX6C	#N/A	#N/A	#N/A		#N/A	#N/A	#N/A
COX7A1	#N/A	#N/A	Cox7a1		#N/A	#N/A	#N/A
COX7A2	#N/A	#N/A	#N/A		#N/A	#N/A	#N/A
COX7A2L	#N/A	#N/A	#N/A		#N/A	#N/A	#N/A
COX7B	#N/A	#N/A	#N/A		#N/A	#N/A	#N/A
COX7B2	#N/A	#N/A	#N/A		#N/A	#N/A	#N/A
COX7C	#N/A	#N/A	#N/A		#N/A	#N/A	#N/A
COX8A	#N/A	#N/A	#N/A		#N/A	#N/A	#N/A
COX8C	#N/A	#N/A	#N/A		#N/A	#N/A	#N/A
CPD	#N/A	#N/A	#N/A		#N/A	#N/A	#N/A
CPM	#N/A	#N/A	#N/A		#N/A	#N/A	#N/A
CPOX	#N/A	#N/A	#N/A		#N/A	#N/A	#N/A
CPT1A	#N/A	#N/A	#N/A		#N/A	#N/A	#N/A
CPT1B	#N/A	#N/A	#N/A		#N/A	#N/A	#N/A
CPT1C	#N/A	#N/A	#N/A		#N/A	#N/A	#N/A
CR1	#N/A	#N/A	#N/A		#N/A	#N/A	#N/A
CR2	#N/A	#N/A	#N/A		#N/A	#N/A	#N/A
CRB1	#N/A	#N/A	#N/A		#N/A	#N/A	#N/A
CRB2	#N/A	#N/A	#N/A		#N/A	#N/A	#N/A
CRB3	#N/A	#N/A	#N/A		#N/A	#N/A	#N/A
CREB3	#N/A	#N/A	#N/A		#N/A	#N/A	#N/A
CREB3L1	#N/A	#N/A	#N/A		#N/A	#N/A	#N/A
CREB3L2	#N/A	#N/A	#N/A		#N/A	#N/A	#N/A
CREB3L3	#N/A	#N/A	#N/A		#N/A	#N/A	#N/A
CREB3L4	#N/A	#N/A	#N/A		#N/A	#N/A	#N/A
CRELD1	#N/A	#N/A	#N/A		#N/A	#N/A	#N/A
CRHR1	#N/A	#N/A	#N/A		#N/A	#N/A	#N/A
CRHR2	#N/A	#N/A	#N/A		#N/A	#N/A	#N/A
CRIM1	#N/A	#N/A	#N/A		#N/A	#N/A	#N/A
CRLF2	#N/A	#N/A	#N/A		#N/A	#N/A	#N/A
CRLS1	#N/A	#N/A	#N/A		#N/A	#N/A	#N/A
CRTAM	#N/A	#N/A	#N/A		#N/A	#N/A	#N/A
CRYAB	#N/A	#N/A	#N/A		#N/A	#N/A	#N/A
CS	#N/A	#N/A	#N/A		#N/A	#N/A	#N/A
CSF1	#N/A	Csf1	#N/A		#N/A	#N/A	#N/A
CSF1R	#N/A	#N/A	#N/A		#N/A	#N/A	#N/A
CSF2RA	#N/A	#N/A	#N/A		#N/A	#N/A	#N/A
CSF2RB	#N/A	#N/A	#N/A		#N/A	#N/A	#N/A
CSF3R	#N/A	Csf3r	Csf3r		#N/A	#N/A	#N/A
CSMD1	#N/A	#N/A	#N/A		#N/A	#N/A	#N/A
CSMD2	#N/A	#N/A	#N/A		#N/A	#N/A	#N/A
CSMD3	#N/A	#N/A	#N/A		#N/A	#N/A	#N/A
CSNK1G1	#N/A	#N/A	#N/A		#N/A	#N/A	#N/A
CSPG4	#N/A	#N/A	#N/A		#N/A	#N/A	#N/A
CSPG5	#N/A	#N/A	#N/A		#N/A	#N/A	#N/A
CTAGE1	#N/A	#N/A	#N/A		#N/A	#N/A	#N/A
CTAGE15	#N/A	#N/A	#N/A		#N/A	#N/A	#N/A
CTAGE4	#N/A	#N/A	#N/A		#N/A	#N/A	#N/A
CTAGE5	#N/A	#N/A	#N/A		#N/A	#N/A	#N/A
CTAGE6	#N/A	#N/A	#N/A		#N/A	#N/A	#N/A
CTAGE8	#N/A	#N/A	#N/A		#N/A	#N/A	#N/A
CTAGE9	#N/A	#N/A	#N/A		#N/A	#N/A	#N/A
CTCFL	#N/A	#N/A	#N/A		#N/A	#N/A	#N/A
CTDNEP1	#N/A	#N/A	#N/A		#N/A	#N/A	#N/A
CTLA4	#N/A	#N/A	#N/A		#N/A	#N/A	#N/A
CTNS	#N/A	#N/A	#N/A		#N/A	Ctns	#N/A
CTSK	#N/A	#N/A	#N/A		#N/A	#N/A	#N/A
CTXN1	#N/A	#N/A	#N/A		#N/A	#N/A	#N/A
CTXN2	#N/A	#N/A	#N/A		#N/A	#N/A	#N/A
CTXN3	#N/A	#N/A	#N/A		#N/A	#N/A	#N/A
CTXND1	#N/A	#N/A	#N/A		#N/A	#N/A	#N/A
CTXND2	#N/A	#N/A	#N/A		#N/A	#N/A	#N/A
CUX1	#N/A	#N/A	#N/A		#N/A	#N/A	#N/A
CUX2	#N/A	#N/A	#N/A		#N/A	#N/A	#N/A
CUZD1	#N/A	#N/A	#N/A		#N/A	#N/A	#N/A
CWH43	#N/A	Cwh43	Cwh43		#N/A	#N/A	#N/A
CX3CL1	#N/A	#N/A	#N/A		#N/A	#N/A	#N/A
CX3CR1	#N/A	Cx3cr1	#N/A		#N/A	#N/A	#N/A
CXADR	#N/A	Cxadr	#N/A		#N/A	#N/A	#N/A
CXCL16	Cxcl16	Cxcl16	Cxcl16		#N/A	#N/A	#N/A
CXCR1	#N/A	#N/A	#N/A		#N/A	#N/A	#N/A
CXCR2	#N/A	#N/A	#N/A		#N/A	#N/A	#N/A
CXCR3	#N/A	#N/A	#N/A		#N/A	#N/A	#N/A
CXCR4	#N/A	Cxcr4	Cxcr4		#N/A	#N/A	#N/A
CXCR5	#N/A	#N/A	#N/A		#N/A	#N/A	#N/A
CXCR6	#N/A	#N/A	#N/A		#N/A	#N/A	#N/A
CXorf66	#N/A	#N/A	#N/A		#N/A	#N/A	#N/A
CYB561	#N/A	#N/A	#N/A		#N/A	#N/A	#N/A
CYB561A3	#N/A	#N/A	#N/A		#N/A	#N/A	#N/A
CYB561D1	#N/A	#N/A	#N/A		#N/A	#N/A	#N/A
CYB561D2	#N/A	#N/A	#N/A		#N/A	#N/A	#N/A
CYB5A	#N/A	#N/A	#N/A		#N/A	#N/A	#N/A
CYB5B	#N/A	#N/A	#N/A		#N/A	#N/A	#N/A
CYB5R2	#N/A	#N/A	#N/A		#N/A	#N/A	#N/A
CYB5R3	#N/A	#N/A	#N/A		#N/A	#N/A	#N/A
CYBA	Cyba	Cyba	Cyba		#N/A	#N/A	#N/A
CYBB	#N/A	#N/A	#N/A		#N/A	#N/A	#N/A
CYBRD1	#N/A	#N/A	#N/A		#N/A	#N/A	#N/A
CYC1	#N/A	#N/A	#N/A		#N/A	#N/A	#N/A
CYHR1	#N/A	#N/A	#N/A		#N/A	#N/A	#N/A
CYP19A1	#N/A	#N/A	#N/A		#N/A	#N/A	#N/A
CYP1A1	#N/A	#N/A	#N/A		#N/A	#N/A	#N/A
CYP1A2	#N/A	#N/A	#N/A		#N/A	#N/A	#N/A
CYP1B1	#N/A	#N/A	#N/A		#N/A	#N/A	#N/A
CYP20A1	#N/A	#N/A	#N/A		#N/A	#N/A	#N/A
CYP26C1	#N/A	#N/A	#N/A		#N/A	#N/A	#N/A
CYP2D6	#N/A	#N/A	#N/A		#N/A	#N/A	#N/A
CYP2S1	#N/A	#N/A	#N/A		#N/A	#N/A	#N/A
CYP2U1	#N/A	#N/A	#N/A		#N/A	#N/A	#N/A
CYP39A1	#N/A	#N/A	#N/A		#N/A	#N/A	#N/A
CYP3A4	#N/A	#N/A	#N/A		#N/A	#N/A	#N/A
CYP3A43	#N/A	#N/A	#N/A		#N/A	#N/A	#N/A
CYP3A5	#N/A	#N/A	#N/A		#N/A	#N/A	#N/A
CYP3A7	#N/A	#N/A	#N/A		#N/A	#N/A	#N/A
CYP3A7-CYP3A51P	#N/A	#N/A	#N/A		#N/A	#N/A	#N/A
CYP4A11	#N/A	#N/A	#N/A		#N/A	#N/A	#N/A
CYP4A22	#N/A	#N/A	#N/A		#N/A	#N/A	#N/A
CYP4B1	#N/A	#N/A	#N/A		#N/A	#N/A	#N/A
CYP4F12	#N/A	#N/A	#N/A		#N/A	#N/A	#N/A
CYP4F2	#N/A	#N/A	#N/A		#N/A	#N/A	#N/A
CYP4F22	#N/A	#N/A	#N/A		#N/A	#N/A	#N/A
CYP4F8	#N/A	#N/A	#N/A		#N/A	#N/A	#N/A
CYP4V2	#N/A	#N/A	#N/A		#N/A	#N/A	#N/A
CYP4X1	#N/A	#N/A	#N/A		#N/A	#N/A	#N/A
CYP4Z1	#N/A	#N/A	#N/A		#N/A	#N/A	#N/A
CYP51A1	#N/A	#N/A	#N/A		#N/A	#N/A	#N/A
CYP7B1	#N/A	Cyp7b1	Cyp7b1		#N/A	#N/A	#N/A
CYP8B1	#N/A	#N/A	#N/A		#N/A	#N/A	#N/A
CYSLTR1	#N/A	#N/A	#N/A		#N/A	#N/A	#N/A
CYSLTR2	#N/A	Cysltr2	Cysltr2		#N/A	#N/A	#N/A
CYYR1	#N/A	#N/A	#N/A		#N/A	#N/A	#N/A
DAD1	#N/A	#N/A	#N/A		#N/A	#N/A	#N/A
DAG1	#N/A	#N/A	#N/A		#N/A	#N/A	#N/A
DAGLA	#N/A	#N/A	#N/A		#N/A	#N/A	#N/A
DAGLB	#N/A	#N/A	#N/A		#N/A	#N/A	#N/A
DAPK1	#N/A	#N/A	#N/A		#N/A	#N/A	#N/A
DAPK2	#N/A	Dapk2	Dapk2		#N/A	#N/A	#N/A
DAPK3	#N/A	#N/A	#N/A		#N/A	#N/A	#N/A
DAPL1	#N/A	Dapl1	#N/A		#N/A	#N/A	#N/A
DCAF17	#N/A	#N/A	#N/A		#N/A	#N/A	#N/A
DCAKD	#N/A	#N/A	#N/A		#N/A	#N/A	#N/A
DCBLD1	#N/A	Dcbld1	#N/A		#N/A	#N/A	#N/A
DCBLD2	#N/A	#N/A	#N/A		#N/A	#N/A	#N/A
DCC	#N/A	#N/A	#N/A		#N/A	#N/A	#N/A
DCHS1	#N/A	#N/A	#N/A		#N/A	#N/A	#N/A
DCHS2	#N/A	#N/A	#N/A		#N/A	#N/A	#N/A
DCLK1	#N/A	Dclk1	Dclk1		#N/A	#N/A	#N/A
DCLK3	#N/A	#N/A	#N/A		#N/A	Dclk3	Dclk3
DCP1B	#N/A	#N/A	#N/A		#N/A	#N/A	#N/A
DCST1	#N/A	#N/A	#N/A		#N/A	Dcst1	#N/A
DCST2	#N/A	#N/A	#N/A		#N/A	#N/A	#N/A
DCSTAMP	#N/A	#N/A	#N/A		#N/A	#N/A	#N/A
DCT	#N/A	#N/A	#N/A		#N/A	#N/A	#N/A
DDO	#N/A	#N/A	#N/A		#N/A	#N/A	#N/A
DDOST	#N/A	#N/A	#N/A		#N/A	#N/A	#N/A
DDR1	#N/A	#N/A	#N/A		#N/A	#N/A	#N/A
DDR2	#N/A	#N/A	#N/A		#N/A	#N/A	#N/A
DDX3X	#N/A	#N/A	#N/A		#N/A	#N/A	#N/A
DEGS1	#N/A	#N/A	#N/A		#N/A	#N/A	#N/A
DEGS2	#N/A	#N/A	#N/A		#N/A	#N/A	#N/A
DENND1A	#N/A	#N/A	#N/A		#N/A	#N/A	#N/A
DENND1B	#N/A	#N/A	#N/A		#N/A	#N/A	#N/A
DENND3	#N/A	#N/A	#N/A		#N/A	#N/A	#N/A
DENND4B	#N/A	#N/A	#N/A		#N/A	#N/A	#N/A
DENND4C	#N/A	#N/A	#N/A		#N/A	#N/A	#N/A
DENND5A	#N/A	#N/A	#N/A		#N/A	#N/A	#N/A
DENND5B	#N/A	#N/A	#N/A		#N/A	#N/A	#N/A
DERL1	#N/A	#N/A	#N/A		#N/A	#N/A	#N/A
DERL2	#N/A	#N/A	#N/A		#N/A	#N/A	#N/A
DERL3	#N/A	#N/A	#N/A		Derl3	Derl3	Derl3
DEUP1	#N/A	#N/A	#N/A		#N/A	#N/A	#N/A
DEXI	#N/A	#N/A	#N/A		#N/A	#N/A	#N/A
DGAT1	#N/A	#N/A	#N/A		#N/A	#N/A	#N/A
DGAT2	#N/A	#N/A	#N/A		#N/A	#N/A	#N/A
DGAT2L6	#N/A	#N/A	#N/A		#N/A	#N/A	#N/A
DGCR2	#N/A	#N/A	#N/A		#N/A	#N/A	#N/A
DGKE	#N/A	#N/A	#N/A		#N/A	#N/A	#N/A
DHCR24	#N/A	#N/A	#N/A		#N/A	#N/A	#N/A
DHCR7	#N/A	#N/A	#N/A		#N/A	#N/A	#N/A
DHODH	#N/A	#N/A	#N/A		#N/A	#N/A	#N/A
DHRS3	#N/A	#N/A	#N/A		#N/A	#N/A	#N/A
DHRS7B	#N/A	#N/A	#N/A		#N/A	#N/A	#N/A
DHRS9	Dhrs9	Dhrs9	Dhrs9		#N/A	#N/A	#N/A
DHX36	#N/A	#N/A	#N/A		#N/A	#N/A	#N/A
DIABLO	#N/A	#N/A	#N/A		#N/A	#N/A	#N/A
DIABLO	#N/A	#N/A	#N/A		#N/A	#N/A	#N/A
DIO1	Dio1	Dio1	Dio1		#N/A	#N/A	#N/A
DIO2	#N/A	#N/A	#N/A		#N/A	#N/A	#N/A
DIO3	#N/A	#N/A	#N/A		#N/A	#N/A	#N/A
DIP2A	#N/A	#N/A	#N/A		#N/A	#N/A	#N/A
DIP2C	#N/A	#N/A	#N/A		#N/A	#N/A	#N/A
DIRC2	#N/A	#N/A	#N/A		#N/A	#N/A	#N/A
DISP1	#N/A	#N/A	Disp1		#N/A	#N/A	#N/A
DISP2	#N/A	#N/A	#N/A		#N/A	#N/A	#N/A
DISP3	#N/A	#N/A	#N/A		#N/A	#N/A	#N/A
DLK1	#N/A	#N/A	#N/A		#N/A	#N/A	#N/A
DLK2	#N/A	#N/A	#N/A		#N/A	#N/A	#N/A
DLL1	#N/A	#N/A	#N/A		#N/A	#N/A	#N/A
DLL3	#N/A	#N/A	#N/A		#N/A	#N/A	#N/A
DLL4	#N/A	Dll4	Dll4		#N/A	#N/A	#N/A
DMAC1	#N/A	#N/A	#N/A		#N/A	#N/A	#N/A
DMPK	#N/A	#N/A	#N/A		Dmpk	Dmpk	Dmpk
DMRT2	#N/A	#N/A	#N/A		#N/A	#N/A	#N/A
DMXL2	#N/A	#N/A	#N/A		#N/A	#N/A	#N/A
DNAH2	#N/A	#N/A	#N/A		#N/A	#N/A	#N/A
DNAJB12	#N/A	#N/A	#N/A		#N/A	#N/A	#N/A
DNAJB14	#N/A	#N/A	#N/A		#N/A	#N/A	#N/A
DNAJC1	#N/A	#N/A	#N/A		#N/A	#N/A	#N/A
DNAJC10	#N/A	#N/A	#N/A		#N/A	#N/A	#N/A
DNAJC11	#N/A	#N/A	#N/A		#N/A	#N/A	#N/A
DNAJC13	#N/A	#N/A	#N/A		#N/A	#N/A	#N/A
DNAJC14	#N/A	#N/A	#N/A		#N/A	#N/A	#N/A
DNAJC15	#N/A	#N/A	#N/A		#N/A	#N/A	#N/A
DNAJC16	#N/A	#N/A	#N/A		#N/A	#N/A	#N/A
DNAJC18	#N/A	#N/A	#N/A		#N/A	#N/A	#N/A
DNAJC22	#N/A	Dnajc22	Dnajc22		#N/A	#N/A	#N/A
DNAJC25	#N/A	#N/A	#N/A		#N/A	#N/A	#N/A
DNAJC30	#N/A	#N/A	#N/A		#N/A	#N/A	#N/A
DNAJC4	#N/A	#N/A	#N/A		#N/A	#N/A	#N/A
DNAJC5	#N/A	#N/A	#N/A		#N/A	#N/A	#N/A
DNAJC5B	#N/A	#N/A	#N/A		#N/A	#N/A	#N/A
DNAJC5G	#N/A	#N/A	#N/A		#N/A	#N/A	#N/A
DNER	#N/A	#N/A	#N/A		Dner	Dner	#N/A
DNPEP	#N/A	#N/A	#N/A		#N/A	#N/A	#N/A
DOK7	#N/A	#N/A	#N/A		#N/A	#N/A	#N/A
DOLK	#N/A	#N/A	#N/A		#N/A	#N/A	#N/A
DOLPP1	#N/A	#N/A	#N/A		#N/A	#N/A	#N/A
DONSON	#N/A	#N/A	#N/A		#N/A	#N/A	#N/A
DOPEY1	#N/A	#N/A	#N/A		#N/A	#N/A	#N/A
DPAGT1	#N/A	#N/A	#N/A		#N/A	#N/A	#N/A
DPCR1	#N/A	#N/A	#N/A		#N/A	#N/A	#N/A
DPEP2	#N/A	#N/A	#N/A		#N/A	#N/A	#N/A
DPM2	#N/A	#N/A	#N/A		#N/A	#N/A	#N/A
DPM3	#N/A	#N/A	#N/A		#N/A	#N/A	#N/A
DPP10	#N/A	#N/A	#N/A		#N/A	#N/A	#N/A
DPP4	#N/A	#N/A	#N/A		#N/A	#N/A	#N/A
DPP6	#N/A	#N/A	#N/A		Dpp6	Dpp6	#N/A
DPY19L1	#N/A	#N/A	#N/A		#N/A	#N/A	#N/A
DPY19L2	#N/A	#N/A	#N/A		#N/A	#N/A	#N/A
DPY19L3	#N/A	#N/A	#N/A		#N/A	#N/A	#N/A
DPY19L4	#N/A	#N/A	#N/A		#N/A	#N/A	#N/A
DRAM1	#N/A	Dram1	Dram1		#N/A	#N/A	#N/A
DRAM2	#N/A	#N/A	#N/A		#N/A	#N/A	#N/A
DRD1	#N/A	#N/A	#N/A		#N/A	#N/A	#N/A
DRD2	#N/A	#N/A	#N/A		#N/A	#N/A	#N/A
DRD3	#N/A	#N/A	#N/A		#N/A	#N/A	#N/A
DRD4	#N/A	#N/A	#N/A		#N/A	#N/A	#N/A
DRD5	#N/A	#N/A	#N/A		#N/A	#N/A	#N/A
DSC1	#N/A	#N/A	#N/A		#N/A	#N/A	#N/A
DSC2	#N/A	Dsc2	Dsc2		#N/A	#N/A	#N/A
DSC3	#N/A	Dsc3	#N/A		#N/A	#N/A	#N/A
DSCAM	#N/A	#N/A	#N/A		#N/A	#N/A	#N/A
DSCAML1	#N/A	#N/A	#N/A		#N/A	#N/A	#N/A
DSE	#N/A	#N/A	#N/A		#N/A	#N/A	#N/A
DSEL	#N/A	#N/A	#N/A		#N/A	#N/A	#N/A
DSG1	#N/A	#N/A	#N/A		#N/A	#N/A	#N/A
DSG2	#N/A	#N/A	#N/A		#N/A	#N/A	#N/A
DSG3	#N/A	#N/A	#N/A		#N/A	#N/A	#N/A
DSG4	#N/A	#N/A	#N/A		#N/A	#N/A	#N/A
DTNA	#N/A	#N/A	#N/A		#N/A	#N/A	#N/A
DUOX1	#N/A	#N/A	#N/A		#N/A	#N/A	#N/A
DUOX2	#N/A	#N/A	#N/A		#N/A	#N/A	#N/A
DUOXA1	#N/A	#N/A	#N/A		#N/A	#N/A	#N/A
DUOXA2	#N/A	#N/A	#N/A		#N/A	#N/A	#N/A
DUSP13	#N/A	#N/A	#N/A		#N/A	#N/A	#N/A
DWORF	#N/A	#N/A	#N/A		#N/A	#N/A	#N/A
DYM	#N/A	#N/A	#N/A		#N/A	#N/A	#N/A
DYNAP	#N/A	#N/A	#N/A		#N/A	#N/A	#N/A
DYRK2	#N/A	#N/A	#N/A		#N/A	#N/A	#N/A
DYSF	#N/A	#N/A	#N/A		#N/A	#N/A	#N/A
DZIP3	#N/A	#N/A	#N/A		#N/A	#N/A	#N/A
E2F5	#N/A	#N/A	#N/A		#N/A	#N/A	#N/A
EBLN1	#N/A	#N/A	#N/A		#N/A	#N/A	#N/A
EBP	#N/A	#N/A	#N/A		#N/A	#N/A	#N/A
EBPL	#N/A	#N/A	#N/A		#N/A	#N/A	#N/A
ECE1	#N/A	#N/A	#N/A		#N/A	#N/A	#N/A
ECE2	#N/A	#N/A	#N/A		#N/A	#N/A	#N/A
ECEL1	#N/A	#N/A	#N/A		#N/A	#N/A	#N/A
ECSCR	#N/A	Ecscr	Ecscr		#N/A	#N/A	#N/A
EDA	#N/A	#N/A	#N/A		#N/A	#N/A	#N/A
EDA2R	#N/A	#N/A	#N/A		#N/A	#N/A	#N/A
EDAR	#N/A	#N/A	#N/A		#N/A	Edar	Edar
EDNRA	#N/A	#N/A	#N/A		#N/A	#N/A	#N/A
EDNRB	#N/A	#N/A	#N/A		#N/A	#N/A	#N/A
EDRF1	#N/A	#N/A	#N/A		#N/A	#N/A	#N/A
EEF1AKMT4-ECE2	#N/A	#N/A	#N/A		#N/A	#N/A	#N/A
EEF1E1	#N/A	#N/A	#N/A		#N/A	#N/A	#N/A
EFCAB14	#N/A	#N/A	#N/A		#N/A	#N/A	#N/A
EFNA3	#N/A	#N/A	#N/A		#N/A	#N/A	#N/A
EFNA4	#N/A	#N/A	#N/A		#N/A	#N/A	#N/A
EFNA5	#N/A	#N/A	#N/A		#N/A	#N/A	#N/A
EFNB1	#N/A	Efnb1	#N/A		#N/A	#N/A	#N/A
EFNB2	Efnb2	Efnb2	Efnb2		#N/A	#N/A	#N/A
EFNB3	#N/A	#N/A	#N/A		#N/A	#N/A	#N/A
EGF	#N/A	#N/A	#N/A		#N/A	Egf	Egf
EGFR	#N/A	#N/A	#N/A		#N/A	#N/A	#N/A
EI24	#N/A	#N/A	#N/A		#N/A	#N/A	#N/A
EIF2AK3	#N/A	#N/A	#N/A		#N/A	#N/A	#N/A
EIF3L	#N/A	#N/A	#N/A		#N/A	#N/A	#N/A
ELFN1	#N/A	#N/A	#N/A		#N/A	#N/A	#N/A
ELFN2	#N/A	#N/A	#N/A		#N/A	#N/A	#N/A
ELMOD1	#N/A	#N/A	#N/A		#N/A	#N/A	#N/A
ELOVL1	#N/A	#N/A	#N/A		#N/A	#N/A	#N/A
ELOVL2	#N/A	#N/A	#N/A		#N/A	#N/A	#N/A
ELOVL3	#N/A	#N/A	#N/A		#N/A	#N/A	#N/A
ELOVL4	#N/A	#N/A	#N/A		#N/A	#N/A	#N/A
ELOVL5	#N/A	#N/A	#N/A		#N/A	#N/A	#N/A
ELOVL6	#N/A	#N/A	#N/A		#N/A	#N/A	#N/A
ELOVL7	#N/A	#N/A	#N/A		#N/A	#N/A	#N/A
ELP6	#N/A	#N/A	#N/A		#N/A	#N/A	#N/A
EMB	#N/A	#N/A	#N/A		#N/A	#N/A	#N/A
EMC1	#N/A	#N/A	#N/A		#N/A	#N/A	#N/A
EMC10	#N/A	#N/A	#N/A		#N/A	#N/A	#N/A
EMC3	#N/A	#N/A	#N/A		#N/A	#N/A	#N/A
EMC4	#N/A	#N/A	#N/A		#N/A	#N/A	#N/A
EMC6	#N/A	#N/A	#N/A		#N/A	#N/A	#N/A
EMC7	#N/A	#N/A	#N/A		#N/A	#N/A	#N/A
EMCN	#N/A	#N/A	#N/A		#N/A	#N/A	#N/A
EMD	#N/A	#N/A	#N/A		#N/A	#N/A	#N/A
EMP1	#N/A	#N/A	#N/A		#N/A	#N/A	#N/A
EMP2	#N/A	#N/A	#N/A		#N/A	#N/A	#N/A
EMP3	#N/A	#N/A	#N/A		#N/A	#N/A	#N/A
ENDOD1	#N/A	Endod1	#N/A		#N/A	#N/A	#N/A
ENG	#N/A	#N/A	#N/A		#N/A	#N/A	#N/A
ENPEP	#N/A	#N/A	#N/A		#N/A	#N/A	#N/A
ENPP1	#N/A	#N/A	#N/A		#N/A	#N/A	#N/A
ENPP2	#N/A	#N/A	#N/A		#N/A	#N/A	#N/A
ENPP4	#N/A	#N/A	#N/A		#N/A	#N/A	#N/A
ENPP5	#N/A	#N/A	#N/A		#N/A	#N/A	#N/A
ENTPD1	#N/A	#N/A	#N/A		#N/A	#N/A	#N/A
ENTPD2	#N/A	#N/A	#N/A		#N/A	#N/A	#N/A
ENTPD3	#N/A	#N/A	#N/A		#N/A	#N/A	Entpd3
ENTPD4	#N/A	#N/A	#N/A		#N/A	#N/A	#N/A
ENTPD6	#N/A	#N/A	#N/A		#N/A	#N/A	#N/A
ENTPD7	#N/A	#N/A	#N/A		#N/A	#N/A	#N/A
ENTPD8	#N/A	Entpd8	Entpd8		#N/A	#N/A	#N/A
EOGT	#N/A	#N/A	Eogt		#N/A	#N/A	#N/A
EPB41	#N/A	#N/A	#N/A		#N/A	#N/A	#N/A
EPB41L2	#N/A	#N/A	#N/A		#N/A	#N/A	#N/A
EPB41L3	#N/A	#N/A	#N/A		#N/A	#N/A	#N/A
EPCAM	#N/A	#N/A	#N/A		#N/A	#N/A	#N/A
EPGN	#N/A	#N/A	#N/A		#N/A	#N/A	#N/A
EPHA1	#N/A	#N/A	#N/A		#N/A	#N/A	#N/A
EPHA10	#N/A	#N/A	#N/A		#N/A	#N/A	#N/A
EPHA2	Epha2	Epha2	Epha2		#N/A	#N/A	#N/A
EPHA3	#N/A	#N/A	#N/A		#N/A	#N/A	#N/A
EPHA4	Epha4	Epha4	Epha4		#N/A	#N/A	#N/A
EPHA5	#N/A	#N/A	#N/A		#N/A	#N/A	#N/A
EPHA6	#N/A	#N/A	#N/A		#N/A	#N/A	#N/A
EPHA7	#N/A	#N/A	#N/A		#N/A	#N/A	#N/A
EPHA8	#N/A	#N/A	#N/A		#N/A	#N/A	#N/A
EPHB1	#N/A	#N/A	#N/A		#N/A	#N/A	#N/A
EPHB2	#N/A	Ephb2	Ephb2		#N/A	#N/A	#N/A
EPHB3	#N/A	#N/A	#N/A		#N/A	#N/A	#N/A
EPHB4	#N/A	#N/A	#N/A		#N/A	#N/A	#N/A
EPHB6	#N/A	#N/A	#N/A		#N/A	Ephb6	Ephb6
EPOR	#N/A	#N/A	#N/A		#N/A	#N/A	#N/A
EPSTI1	Epsti1	Epsti1	Epsti1		#N/A	#N/A	#N/A
EQTN	#N/A	#N/A	#N/A		#N/A	#N/A	#N/A
ERBB2	#N/A	#N/A	#N/A		#N/A	#N/A	#N/A
ERBB3	#N/A	#N/A	#N/A		#N/A	#N/A	#N/A
ERBB4	#N/A	#N/A	#N/A		#N/A	Erbb4	Erbb4
EREG	#N/A	#N/A	#N/A		#N/A	#N/A	#N/A
ERG28	#N/A	#N/A	#N/A		#N/A	#N/A	#N/A
ERGIC1	#N/A	#N/A	#N/A		#N/A	#N/A	#N/A
ERGIC2	#N/A	#N/A	#N/A		#N/A	#N/A	#N/A
ERGIC3	#N/A	#N/A	#N/A		#N/A	#N/A	#N/A
ERMAP	#N/A	#N/A	#N/A		#N/A	#N/A	#N/A
ERMARD	#N/A	#N/A	#N/A		#N/A	#N/A	#N/A
ERMP1	#N/A	#N/A	#N/A		#N/A	#N/A	#N/A
ERN1	#N/A	#N/A	#N/A		#N/A	#N/A	#N/A
ERN2	Ern2	Ern2	Ern2		#N/A	#N/A	#N/A
ERVFRD-1	#N/A	#N/A	#N/A		#N/A	#N/A	#N/A
ERVMER34-1	#N/A	#N/A	#N/A		#N/A	#N/A	#N/A
ERVV-1	#N/A	#N/A	#N/A		#N/A	#N/A	#N/A
ERVV-2	#N/A	#N/A	#N/A		#N/A	#N/A	#N/A
ERVW-1	#N/A	#N/A	#N/A		#N/A	#N/A	#N/A
ESAM	#N/A	#N/A	#N/A		#N/A	#N/A	#N/A
ESPL1	Espl1	Espl1	Espl1		#N/A	#N/A	#N/A
ESYT1	#N/A	#N/A	#N/A		#N/A	#N/A	#N/A
ESYT2	#N/A	#N/A	#N/A		#N/A	#N/A	#N/A
ESYT3	#N/A	#N/A	#N/A		#N/A	#N/A	Esyt3
ETFDH	#N/A	#N/A	#N/A		#N/A	#N/A	#N/A
ETNK1	#N/A	#N/A	#N/A		#N/A	#N/A	#N/A
EVA1A	Eva1a	Eva1a	Eva1a		#N/A	#N/A	#N/A
EVA1C	#N/A	#N/A	#N/A		#N/A	#N/A	#N/A
EVC	#N/A	#N/A	#N/A		#N/A	#N/A	#N/A
EVC2	#N/A	#N/A	#N/A		#N/A	#N/A	#N/A
EVI2A	#N/A	#N/A	#N/A		#N/A	#N/A	#N/A
EVI2B	#N/A	#N/A	#N/A		#N/A	#N/A	#N/A
EVI5	#N/A	#N/A	#N/A		#N/A	#N/A	#N/A
EVI5L	#N/A	#N/A	#N/A		#N/A	#N/A	#N/A
EXD2	#N/A	#N/A	#N/A		#N/A	#N/A	#N/A
EXT1	#N/A	#N/A	#N/A		#N/A	#N/A	#N/A
EXT2	#N/A	#N/A	#N/A		#N/A	#N/A	#N/A
EXTL3	#N/A	#N/A	#N/A		#N/A	#N/A	#N/A
F11R	#N/A	#N/A	#N/A		#N/A	#N/A	#N/A
F2R	#N/A	#N/A	#N/A		#N/A	#N/A	#N/A
F2RL1	#N/A	#N/A	#N/A		#N/A	#N/A	#N/A
F2RL2	#N/A	#N/A	#N/A		#N/A	#N/A	#N/A
F2RL3	#N/A	#N/A	#N/A		#N/A	#N/A	#N/A
F3	F3	F3	F3		#N/A	#N/A	#N/A
FA2H	Fa2h	Fa2h	Fa2h		#N/A	#N/A	#N/A
FAAH	#N/A	#N/A	#N/A		#N/A	#N/A	#N/A
FADS1	#N/A	#N/A	#N/A		#N/A	#N/A	#N/A
FADS2	#N/A	#N/A	#N/A		#N/A	#N/A	#N/A
FADS3	#N/A	#N/A	#N/A		#N/A	#N/A	#N/A
FADS6	#N/A	#N/A	Fads6		#N/A	#N/A	#N/A
FAF2	#N/A	#N/A	#N/A		#N/A	#N/A	#N/A
FAIM2	#N/A	#N/A	#N/A		Faim2	#N/A	#N/A
FAM105A	#N/A	#N/A	#N/A		#N/A	#N/A	#N/A
FAM122C	#N/A	#N/A	#N/A		#N/A	#N/A	#N/A
FAM155A	#N/A	#N/A	#N/A		#N/A	#N/A	#N/A
FAM155B	#N/A	#N/A	#N/A		#N/A	#N/A	#N/A
FAM160A2	#N/A	#N/A	#N/A		#N/A	#N/A	#N/A
FAM162A	#N/A	#N/A	#N/A		#N/A	#N/A	#N/A
FAM162B	#N/A	#N/A	#N/A		#N/A	#N/A	#N/A
FAM163A	#N/A	#N/A	#N/A		#N/A	#N/A	#N/A
FAM163B	#N/A	#N/A	#N/A		#N/A	#N/A	#N/A
FAM171A1	#N/A	#N/A	#N/A		#N/A	#N/A	#N/A
FAM171A2	#N/A	#N/A	#N/A		#N/A	#N/A	#N/A
FAM171B	#N/A	#N/A	#N/A		Fam171b	Fam171b	Fam171b
FAM173A	#N/A	#N/A	#N/A		#N/A	#N/A	#N/A
FAM173B	#N/A	#N/A	#N/A		#N/A	#N/A	#N/A
FAM174A	#N/A	#N/A	#N/A		#N/A	#N/A	#N/A
FAM174B	#N/A	#N/A	#N/A		#N/A	#N/A	Fam174b
FAM187A	#N/A	#N/A	#N/A		#N/A	#N/A	#N/A
FAM187B	#N/A	#N/A	#N/A		#N/A	#N/A	Fam187b
FAM189A1	#N/A	#N/A	#N/A		Fam189a1	Fam189a1	Fam189a1
FAM189A2	#N/A	#N/A	Fam189a2		#N/A	#N/A	#N/A
FAM189B	#N/A	#N/A	#N/A		#N/A	#N/A	#N/A
FAM198B	#N/A	#N/A	#N/A		#N/A	#N/A	#N/A
FAM205A	#N/A	#N/A	#N/A		#N/A	#N/A	#N/A
FAM205C	#N/A	#N/A	#N/A		#N/A	#N/A	#N/A
FAM209A	#N/A	#N/A	#N/A		#N/A	#N/A	#N/A
FAM209B	#N/A	#N/A	#N/A		#N/A	#N/A	#N/A
FAM210A	#N/A	#N/A	#N/A		#N/A	#N/A	#N/A
FAM210B	#N/A	#N/A	#N/A		#N/A	#N/A	#N/A
FAM213A	#N/A	#N/A	#N/A		#N/A	#N/A	#N/A
FAM220A	#N/A	#N/A	#N/A		#N/A	#N/A	#N/A
FAM234A	#N/A	#N/A	#N/A		#N/A	#N/A	#N/A
FAM234B	#N/A	#N/A	#N/A		#N/A	#N/A	#N/A
FAM241A	#N/A	#N/A	#N/A		#N/A	#N/A	#N/A
FAM241B	#N/A	#N/A	#N/A		#N/A	#N/A	#N/A
FAM35A	#N/A	#N/A	#N/A		#N/A	#N/A	#N/A
FAM3A	#N/A	#N/A	#N/A		#N/A	#N/A	#N/A
FAM3B	#N/A	#N/A	#N/A		#N/A	#N/A	#N/A
FAM3D	#N/A	#N/A	#N/A		#N/A	#N/A	#N/A
FAM57A	Fam57a	Fam57a	Fam57a		#N/A	#N/A	#N/A
FAM57B	#N/A	#N/A	#N/A		#N/A	#N/A	#N/A
FAM69A	#N/A	#N/A	#N/A		#N/A	#N/A	#N/A
FAM69B	#N/A	#N/A	#N/A		#N/A	#N/A	#N/A
FAM76B	#N/A	#N/A	#N/A		#N/A	#N/A	#N/A
FAM8A1	#N/A	#N/A	#N/A		#N/A	#N/A	#N/A
FAM98B	#N/A	#N/A	#N/A		#N/A	#N/A	#N/A
FAM9C	#N/A	#N/A	#N/A		#N/A	#N/A	#N/A
FANCA	Fanca	Fanca	Fanca		#N/A	#N/A	#N/A
FAR1	#N/A	#N/A	#N/A		#N/A	#N/A	#N/A
FAR2	#N/A	#N/A	#N/A		#N/A	#N/A	#N/A
FAS	#N/A	#N/A	#N/A		#N/A	#N/A	#N/A
FASLG	#N/A	#N/A	#N/A		#N/A	#N/A	#N/A
FAT1	#N/A	#N/A	#N/A		#N/A	#N/A	#N/A
FAT2	#N/A	#N/A	#N/A		#N/A	#N/A	#N/A
FAT3	#N/A	#N/A	#N/A		#N/A	#N/A	Fat3
FAT4	#N/A	#N/A	#N/A		#N/A	#N/A	#N/A
FATE1	#N/A	#N/A	#N/A		#N/A	#N/A	#N/A
FAXDC2	#N/A	#N/A	#N/A		#N/A	#N/A	#N/A
FBXL17	#N/A	#N/A	#N/A		#N/A	#N/A	#N/A
FBXO18	#N/A	#N/A	#N/A		#N/A	#N/A	#N/A
FBXO31	#N/A	#N/A	#N/A		#N/A	Fbxo31	Fbxo31
FBXW12	#N/A	#N/A	#N/A		#N/A	#N/A	#N/A
FCAMR	#N/A	#N/A	#N/A		#N/A	#N/A	Fcamr
FCAR	#N/A	#N/A	#N/A		#N/A	#N/A	#N/A
FCER1A	#N/A	#N/A	#N/A		#N/A	#N/A	#N/A
FCER1G	#N/A	#N/A	Fcer1g		#N/A	#N/A	#N/A
FCER2	#N/A	#N/A	#N/A		#N/A	#N/A	#N/A
FCGR1A	#N/A	#N/A	#N/A		#N/A	#N/A	#N/A
FCGR1B	#N/A	#N/A	#N/A		#N/A	#N/A	#N/A
FCGR2A	#N/A	#N/A	#N/A		#N/A	#N/A	#N/A
FCGR2B	#N/A	#N/A	#N/A		#N/A	#N/A	#N/A
FCGR3A	#N/A	#N/A	#N/A		#N/A	#N/A	#N/A
FCGR3B	#N/A	#N/A	#N/A		#N/A	#N/A	#N/A
FCGRT	#N/A	#N/A	#N/A		#N/A	#N/A	#N/A
FCMR	#N/A	#N/A	#N/A		#N/A	#N/A	#N/A
FCN1	#N/A	#N/A	#N/A		#N/A	#N/A	#N/A
FCRL1	#N/A	#N/A	#N/A		#N/A	#N/A	#N/A
FCRL2	#N/A	#N/A	#N/A		#N/A	#N/A	#N/A
FCRL3	#N/A	#N/A	#N/A		#N/A	#N/A	#N/A
FCRL4	#N/A	#N/A	#N/A		#N/A	#N/A	#N/A
FCRL5	#N/A	#N/A	#N/A		#N/A	#N/A	#N/A
FCRL6	#N/A	#N/A	#N/A		#N/A	#N/A	#N/A
FCRLA	#N/A	#N/A	#N/A		#N/A	#N/A	#N/A
FDFT1	#N/A	#N/A	#N/A		#N/A	#N/A	#N/A
FER1L5	#N/A	#N/A	#N/A		#N/A	#N/A	#N/A
FER1L6	#N/A	#N/A	#N/A		#N/A	#N/A	#N/A
FFAR1	#N/A	#N/A	#N/A		#N/A	#N/A	#N/A
FFAR2	#N/A	#N/A	#N/A		#N/A	#N/A	#N/A
FFAR3	#N/A	#N/A	#N/A		#N/A	#N/A	#N/A
FFAR4	Ffar4	Ffar4	Ffar4		#N/A	#N/A	#N/A
FGFR1	#N/A	#N/A	#N/A		#N/A	#N/A	#N/A
FGFR2	#N/A	#N/A	#N/A		#N/A	#N/A	#N/A
FGFR3	#N/A	#N/A	#N/A		#N/A	#N/A	#N/A
FGFR4	#N/A	#N/A	#N/A		#N/A	#N/A	#N/A
FGFRL1	#N/A	#N/A	#N/A		#N/A	#N/A	#N/A
FIG4	#N/A	#N/A	#N/A		#N/A	#N/A	#N/A
FIS1	#N/A	#N/A	#N/A		#N/A	#N/A	#N/A
FITM1	#N/A	#N/A	#N/A		#N/A	#N/A	#N/A
FITM2	#N/A	#N/A	#N/A		#N/A	#N/A	#N/A
FKBP11	#N/A	#N/A	#N/A		#N/A	Fkbp11	#N/A
FKBP1A	#N/A	#N/A	#N/A		#N/A	#N/A	#N/A
FKBP8	#N/A	#N/A	#N/A		#N/A	#N/A	#N/A
FKRP	#N/A	#N/A	#N/A		#N/A	#N/A	#N/A
FLRT1	#N/A	#N/A	#N/A		Flrt1	Flrt1	#N/A
FLRT2	#N/A	#N/A	#N/A		Flrt2	#N/A	#N/A
FLRT3	#N/A	#N/A	#N/A		#N/A	#N/A	#N/A
FLT1	#N/A	#N/A	#N/A		#N/A	#N/A	#N/A
FLT3	#N/A	#N/A	#N/A		#N/A	#N/A	#N/A
FLT3LG	#N/A	#N/A	#N/A		#N/A	#N/A	#N/A
FLT4	#N/A	#N/A	Flt4		#N/A	#N/A	#N/A
FLVCR1	#N/A	#N/A	#N/A		#N/A	#N/A	#N/A
FLVCR2	#N/A	#N/A	#N/A		#N/A	#N/A	#N/A
FMNL1	#N/A	#N/A	#N/A		#N/A	#N/A	#N/A
FMO1	#N/A	#N/A	#N/A		#N/A	Fmo1	#N/A
FMO2	#N/A	#N/A	#N/A		#N/A	#N/A	Fmo2
FMO3	#N/A	#N/A	#N/A		#N/A	#N/A	#N/A
FMO4	#N/A	#N/A	#N/A		#N/A	#N/A	#N/A
FMO5	#N/A	#N/A	#N/A		#N/A	Fmo5	#N/A
FMR1NB	#N/A	#N/A	#N/A		#N/A	#N/A	#N/A
FNDC10	#N/A	#N/A	#N/A		#N/A	#N/A	#N/A
FNDC3A	#N/A	#N/A	#N/A		#N/A	#N/A	#N/A
FNDC3B	#N/A	#N/A	#N/A		#N/A	#N/A	#N/A
FNDC4	#N/A	#N/A	#N/A		#N/A	#N/A	#N/A
FNDC5	#N/A	#N/A	#N/A		#N/A	Fndc5	Fndc5
FNDC9	#N/A	#N/A	#N/A		#N/A	#N/A	#N/A
FO681492.1	#N/A	#N/A	#N/A		#N/A	#N/A	#N/A
FOCAD	#N/A	#N/A	#N/A		#N/A	#N/A	#N/A
FOLH1	#N/A	#N/A	#N/A		#N/A	#N/A	#N/A
FOLR1	Folr1	Folr1	Folr1		#N/A	#N/A	#N/A
FOLR2	#N/A	#N/A	#N/A		#N/A	#N/A	#N/A
FP565260.3	#N/A	#N/A	#N/A		#N/A	#N/A	#N/A
FPR1	#N/A	#N/A	#N/A		#N/A	#N/A	#N/A
FPR2	#N/A	#N/A	Fpr2		#N/A	#N/A	#N/A
FPR3	#N/A	#N/A	#N/A		#N/A	#N/A	#N/A
FRAS1	#N/A	#N/A	#N/A		#N/A	#N/A	#N/A
FREM2	#N/A	Frem2	#N/A		#N/A	#N/A	#N/A
FRMD3	#N/A	#N/A	#N/A		#N/A	#N/A	#N/A
FRMD5	#N/A	#N/A	#N/A		#N/A	#N/A	#N/A
FRRS1	#N/A	Frrs1	Frrs1		#N/A	#N/A	#N/A
FRRS1L	#N/A	#N/A	#N/A		#N/A	#N/A	#N/A
FSD1L	#N/A	#N/A	#N/A		#N/A	#N/A	#N/A
FSHR	#N/A	#N/A	#N/A		#N/A	#N/A	#N/A
FURIN	#N/A	#N/A	#N/A		#N/A	#N/A	#N/A
FUT1	#N/A	#N/A	#N/A		#N/A	#N/A	#N/A
FUT2	#N/A	#N/A	#N/A		#N/A	#N/A	#N/A
FUT3	#N/A	#N/A	#N/A		#N/A	#N/A	#N/A
FUT4	Fut4	Fut4	Fut4		#N/A	#N/A	#N/A
FUT5	#N/A	#N/A	#N/A		#N/A	#N/A	#N/A
FUT6	#N/A	#N/A	#N/A		#N/A	#N/A	#N/A
FUT8	#N/A	#N/A	#N/A		#N/A	#N/A	#N/A
FUT9	#N/A	Fut9	#N/A		#N/A	#N/A	#N/A
FUZ	#N/A	#N/A	#N/A		#N/A	#N/A	#N/A
FXYD1	#N/A	#N/A	#N/A		#N/A	#N/A	#N/A
FXYD2	#N/A	#N/A	#N/A		#N/A	#N/A	#N/A
FXYD3	#N/A	#N/A	#N/A		#N/A	#N/A	#N/A
FXYD4	#N/A	Fxyd4	Fxyd4		#N/A	#N/A	#N/A
FXYD5	#N/A	#N/A	#N/A		#N/A	#N/A	#N/A
FXYD6	#N/A	#N/A	Fxyd6		#N/A	#N/A	#N/A
FXYD6-FXYD2	#N/A	#N/A	#N/A		#N/A	#N/A	#N/A
FXYD7	#N/A	#N/A	#N/A		#N/A	#N/A	#N/A
FZD1	#N/A	#N/A	#N/A		#N/A	#N/A	#N/A
FZD10	#N/A	#N/A	#N/A		#N/A	#N/A	#N/A
FZD2	#N/A	#N/A	#N/A		#N/A	#N/A	#N/A
FZD3	#N/A	#N/A	#N/A		#N/A	#N/A	#N/A
FZD4	#N/A	#N/A	#N/A		#N/A	#N/A	#N/A
FZD5	#N/A	#N/A	#N/A		#N/A	#N/A	#N/A
FZD6	#N/A	#N/A	#N/A		#N/A	#N/A	#N/A
FZD7	#N/A	#N/A	#N/A		#N/A	#N/A	#N/A
FZD8	#N/A	#N/A	#N/A		#N/A	#N/A	#N/A
FZD9	#N/A	#N/A	#N/A		#N/A	#N/A	#N/A
G6PC	#N/A	#N/A	#N/A		#N/A	#N/A	#N/A
G6PC2	#N/A	#N/A	#N/A		G6pc2	G6pc2	G6pc2
G6PC3	#N/A	#N/A	#N/A		#N/A	#N/A	#N/A
GABBR1	#N/A	#N/A	#N/A		#N/A	#N/A	#N/A
GABBR2	#N/A	#N/A	#N/A		#N/A	#N/A	#N/A
GABRA1	#N/A	#N/A	#N/A		#N/A	#N/A	#N/A
GABRA2	#N/A	#N/A	#N/A		#N/A	#N/A	#N/A
GABRA3	#N/A	#N/A	#N/A		#N/A	#N/A	#N/A
GABRA4	#N/A	#N/A	#N/A		#N/A	Gabra4	Gabra4
GABRA5	#N/A	#N/A	#N/A		#N/A	#N/A	#N/A
GABRA6	#N/A	#N/A	#N/A		#N/A	#N/A	#N/A
GABRB1	#N/A	#N/A	#N/A		#N/A	#N/A	#N/A
GABRB2	#N/A	#N/A	#N/A		#N/A	#N/A	#N/A
GABRB3	#N/A	#N/A	#N/A		#N/A	#N/A	#N/A
GABRD	#N/A	#N/A	#N/A		#N/A	#N/A	#N/A
GABRE	#N/A	Gabre	Gabre		#N/A	#N/A	#N/A
GABRG1	#N/A	#N/A	#N/A		#N/A	#N/A	#N/A
GABRG2	#N/A	#N/A	#N/A		#N/A	#N/A	#N/A
GABRG3	#N/A	Gabrg3	Gabrg3		#N/A	#N/A	#N/A
GABRP	Gabrp	Gabrp	Gabrp		#N/A	#N/A	#N/A
GABRQ	#N/A	#N/A	#N/A		#N/A	#N/A	#N/A
GABRR1	#N/A	#N/A	#N/A		#N/A	#N/A	#N/A
GABRR2	#N/A	#N/A	#N/A		#N/A	#N/A	#N/A
GABRR3	#N/A	#N/A	#N/A		#N/A	#N/A	#N/A
GAL3ST4	#N/A	#N/A	#N/A		#N/A	#N/A	#N/A
GALC	#N/A	#N/A	#N/A		#N/A	#N/A	#N/A
GALNT1	#N/A	#N/A	#N/A		#N/A	#N/A	#N/A
GALNT11	#N/A	#N/A	#N/A		#N/A	#N/A	#N/A
GALNT14	#N/A	Galnt14	#N/A		#N/A	#N/A	#N/A
GALNT18	#N/A	#N/A	#N/A		#N/A	Galnt18	Galnt18
GALNT3	#N/A	#N/A	#N/A		#N/A	#N/A	#N/A
GALNT8	#N/A	#N/A	#N/A		#N/A	#N/A	#N/A
GALNT9	#N/A	#N/A	#N/A		Galnt9	Galnt9	Galnt9
GALNTL5	#N/A	#N/A	#N/A		#N/A	#N/A	#N/A
GALR1	#N/A	#N/A	#N/A		#N/A	#N/A	#N/A
GALR2	#N/A	#N/A	#N/A		#N/A	Galr2	#N/A
GALR3	#N/A	#N/A	#N/A		#N/A	#N/A	#N/A
GCGR	#N/A	#N/A	#N/A		#N/A	#N/A	#N/A
GCNT2	#N/A	#N/A	#N/A		#N/A	#N/A	#N/A
GCNT3	#N/A	Gcnt3	Gcnt3		#N/A	#N/A	#N/A
GCSAML-AS1	#N/A	#N/A	#N/A		#N/A	#N/A	#N/A
GDAP1	#N/A	#N/A	#N/A		#N/A	#N/A	#N/A
GDAP1L1	#N/A	#N/A	#N/A		#N/A	#N/A	#N/A
GDE1	Gde1	Gde1	Gde1		#N/A	#N/A	#N/A
GDPD1	#N/A	#N/A	#N/A		#N/A	#N/A	#N/A
GDPD2	#N/A	#N/A	#N/A		#N/A	#N/A	#N/A
GDPD3	#N/A	#N/A	#N/A		#N/A	#N/A	#N/A
GDPD4	#N/A	#N/A	#N/A		#N/A	#N/A	#N/A
GDPD5	Gdpd5	Gdpd5	#N/A		#N/A	#N/A	#N/A
GFPT1	#N/A	#N/A	#N/A		#N/A	#N/A	#N/A
GFPT2	#N/A	#N/A	#N/A		#N/A	#N/A	#N/A
GFRA1	#N/A	Gfra1	#N/A		#N/A	#N/A	#N/A
GFRA3	#N/A	#N/A	#N/A		#N/A	#N/A	#N/A
GFRAL	#N/A	#N/A	#N/A		#N/A	Gfral	#N/A
GFY	#N/A	#N/A	#N/A		#N/A	#N/A	#N/A
GGCX	#N/A	#N/A	#N/A		#N/A	#N/A	#N/A
GGT1	#N/A	#N/A	#N/A		Ggt1	Ggt1	Ggt1
GGT2	#N/A	#N/A	#N/A		#N/A	#N/A	#N/A
GGT6	#N/A	#N/A	#N/A		#N/A	#N/A	#N/A
GGT7	#N/A	#N/A	#N/A		#N/A	#N/A	#N/A
GHITM	#N/A	#N/A	#N/A		#N/A	#N/A	#N/A
GHR	#N/A	#N/A	#N/A		#N/A	#N/A	#N/A
GHRHR	#N/A	#N/A	#N/A		#N/A	#N/A	#N/A
GHSR	#N/A	#N/A	#N/A		#N/A	#N/A	#N/A
GIMAP1	#N/A	#N/A	Gimap1		#N/A	#N/A	#N/A
GIMAP1-GIMAP5	#N/A	#N/A	#N/A		#N/A	#N/A	#N/A
GIMAP2	#N/A	#N/A	#N/A		#N/A	#N/A	#N/A
GIMAP5	#N/A	#N/A	#N/A		#N/A	#N/A	#N/A
GINM1	#N/A	#N/A	#N/A		#N/A	#N/A	#N/A
GIPR	#N/A	#N/A	#N/A		#N/A	#N/A	#N/A
GJA1	#N/A	#N/A	#N/A		#N/A	#N/A	#N/A
GJA10	#N/A	#N/A	#N/A		#N/A	#N/A	#N/A
GJA3	#N/A	#N/A	#N/A		#N/A	#N/A	#N/A
GJA4	#N/A	#N/A	#N/A		#N/A	#N/A	#N/A
GJA5	#N/A	#N/A	#N/A		#N/A	#N/A	#N/A
GJA8	#N/A	#N/A	#N/A		#N/A	#N/A	#N/A
GJA9	#N/A	#N/A	#N/A		#N/A	#N/A	#N/A
GJB1	#N/A	#N/A	#N/A		#N/A	#N/A	#N/A
GJB2	#N/A	#N/A	#N/A		#N/A	#N/A	#N/A
GJB3	#N/A	#N/A	#N/A		#N/A	#N/A	#N/A
GJB4	#N/A	#N/A	#N/A		#N/A	#N/A	#N/A
GJB5	#N/A	#N/A	#N/A		#N/A	#N/A	#N/A
GJB6	#N/A	#N/A	#N/A		#N/A	#N/A	#N/A
GJB7	#N/A	#N/A	#N/A		#N/A	#N/A	#N/A
GJC1	#N/A	#N/A	#N/A		#N/A	#N/A	#N/A
GJC2	#N/A	#N/A	#N/A		#N/A	#N/A	#N/A
GJC3	#N/A	#N/A	#N/A		#N/A	Gjc3	Gjc3
GJD2	#N/A	#N/A	#N/A		#N/A	#N/A	#N/A
GJD3	#N/A	#N/A	#N/A		#N/A	#N/A	#N/A
GJD4	#N/A	#N/A	#N/A		#N/A	#N/A	#N/A
GJE1	#N/A	#N/A	#N/A		#N/A	#N/A	#N/A
GK	#N/A	#N/A	#N/A		#N/A	#N/A	#N/A
GK2	#N/A	#N/A	#N/A		#N/A	#N/A	#N/A
GK3P	#N/A	#N/A	#N/A		#N/A	#N/A	#N/A
GLCCI1	#N/A	#N/A	#N/A		#N/A	#N/A	#N/A
GLG1	#N/A	#N/A	#N/A		#N/A	#N/A	#N/A
GLIPR1	#N/A	#N/A	Glipr1		#N/A	#N/A	#N/A
GLIPR1L2	#N/A	#N/A	#N/A		#N/A	#N/A	#N/A
GLMP	#N/A	#N/A	#N/A		#N/A	#N/A	#N/A
GLP1R	#N/A	#N/A	#N/A		#N/A	#N/A	#N/A
GLP2R	#N/A	#N/A	#N/A		#N/A	#N/A	#N/A
GLRA1	#N/A	#N/A	#N/A		#N/A	#N/A	#N/A
GLRA2	#N/A	#N/A	#N/A		#N/A	#N/A	#N/A
GLRA3	#N/A	#N/A	#N/A		#N/A	#N/A	#N/A
GLRA4	#N/A	#N/A	#N/A		#N/A	#N/A	#N/A
GLRB	#N/A	#N/A	#N/A		#N/A	#N/A	#N/A
GLT8D1	#N/A	#N/A	#N/A		#N/A	#N/A	#N/A
GNE	#N/A	#N/A	#N/A		#N/A	#N/A	#N/A
GNPTAB	#N/A	#N/A	#N/A		#N/A	#N/A	#N/A
GNRHR	#N/A	#N/A	#N/A		#N/A	#N/A	#N/A
GOLGA5	#N/A	#N/A	#N/A		#N/A	#N/A	#N/A
GOLGB1	#N/A	#N/A	#N/A		#N/A	#N/A	#N/A
GOLIM4	#N/A	#N/A	#N/A		#N/A	#N/A	#N/A
GOLT1A	#N/A	#N/A	#N/A		#N/A	#N/A	#N/A
GOLT1B	#N/A	#N/A	#N/A		#N/A	#N/A	#N/A
GOSR1	#N/A	#N/A	#N/A		#N/A	#N/A	#N/A
GOSR2	#N/A	#N/A	#N/A		#N/A	#N/A	#N/A
GP1BA	#N/A	#N/A	#N/A		#N/A	#N/A	#N/A
GP1BB	#N/A	#N/A	#N/A		#N/A	#N/A	#N/A
GP2	Gp2	Gp2	Gp2		#N/A	#N/A	#N/A
GP5	#N/A	#N/A	#N/A		#N/A	#N/A	#N/A
GP6	#N/A	#N/A	#N/A		#N/A	#N/A	#N/A
GP9	#N/A	#N/A	#N/A		#N/A	#N/A	#N/A
GPA33	Gpa33	Gpa33	Gpa33		#N/A	#N/A	#N/A
GPAA1	#N/A	#N/A	#N/A		#N/A	#N/A	#N/A
GPAM	#N/A	#N/A	#N/A		#N/A	Gpam	Gpam
GPAT2	#N/A	#N/A	#N/A		#N/A	#N/A	#N/A
GPAT3	#N/A	#N/A	#N/A		#N/A	#N/A	#N/A
GPAT4	#N/A	#N/A	#N/A		#N/A	#N/A	#N/A
GPBAR1	#N/A	#N/A	#N/A		#N/A	#N/A	#N/A
GPC1	#N/A	#N/A	Gpc1		#N/A	#N/A	#N/A
GPC3	#N/A	#N/A	#N/A		#N/A	#N/A	#N/A
GPC4	#N/A	#N/A	#N/A		#N/A	#N/A	#N/A
GPER1	#N/A	#N/A	#N/A		#N/A	#N/A	#N/A
GPI	#N/A	#N/A	#N/A		#N/A	#N/A	#N/A
GPM6A	#N/A	#N/A	#N/A		#N/A	#N/A	#N/A
GPM6B	#N/A	#N/A	#N/A		#N/A	#N/A	#N/A
GPNMB	#N/A	#N/A	#N/A		#N/A	#N/A	#N/A
GPR1	#N/A	#N/A	#N/A		#N/A	#N/A	#N/A
GPR101	#N/A	#N/A	#N/A		#N/A	#N/A	#N/A
GPR107	#N/A	#N/A	#N/A		#N/A	#N/A	#N/A
GPR108	#N/A	#N/A	#N/A		#N/A	#N/A	#N/A
GPR119	#N/A	#N/A	#N/A		#N/A	#N/A	#N/A
GPR12	#N/A	#N/A	#N/A		#N/A	#N/A	#N/A
GPR132	#N/A	#N/A	#N/A		#N/A	#N/A	#N/A
GPR135	#N/A	#N/A	#N/A		#N/A	#N/A	#N/A
GPR137	#N/A	#N/A	#N/A		#N/A	#N/A	#N/A
GPR137B	#N/A	#N/A	#N/A		#N/A	#N/A	#N/A
GPR137C	#N/A	Gpr137c	Gpr137c		#N/A	#N/A	#N/A
GPR139	#N/A	#N/A	#N/A		#N/A	#N/A	#N/A
GPR141	#N/A	Gpr141	Gpr141		#N/A	#N/A	#N/A
GPR142	#N/A	#N/A	#N/A		#N/A	#N/A	#N/A
GPR143	#N/A	#N/A	#N/A		#N/A	#N/A	#N/A
GPR146	#N/A	#N/A	#N/A		#N/A	#N/A	#N/A
GPR148	#N/A	#N/A	#N/A		#N/A	#N/A	#N/A
GPR149	#N/A	#N/A	#N/A		#N/A	#N/A	#N/A
GPR15	#N/A	#N/A	#N/A		#N/A	#N/A	#N/A
GPR150	#N/A	#N/A	#N/A		#N/A	#N/A	#N/A
GPR151	#N/A	#N/A	#N/A		#N/A	#N/A	#N/A
GPR152	#N/A	#N/A	#N/A		#N/A	#N/A	#N/A
GPR153	#N/A	#N/A	#N/A		#N/A	#N/A	#N/A
GPR155	#N/A	#N/A	#N/A		#N/A	#N/A	#N/A
GPR156	#N/A	#N/A	#N/A		#N/A	#N/A	#N/A
GPR157	#N/A	#N/A	#N/A		#N/A	#N/A	#N/A
GPR158	#N/A	#N/A	#N/A		#N/A	#N/A	#N/A
GPR160	#N/A	#N/A	#N/A		#N/A	#N/A	#N/A
GPR161	#N/A	#N/A	#N/A		#N/A	#N/A	#N/A
GPR162	#N/A	#N/A	#N/A		#N/A	#N/A	#N/A
GPR17	#N/A	#N/A	#N/A		#N/A	#N/A	#N/A
GPR171	#N/A	Gpr171	Gpr171		#N/A	#N/A	#N/A
GPR173	#N/A	#N/A	#N/A		#N/A	#N/A	#N/A
GPR174	#N/A	#N/A	#N/A		#N/A	#N/A	#N/A
GPR176	#N/A	Gpr176	Gpr176		#N/A	#N/A	#N/A
GPR179	#N/A	#N/A	#N/A		#N/A	#N/A	#N/A
GPR18	#N/A	#N/A	#N/A		#N/A	#N/A	#N/A
GPR180	#N/A	#N/A	#N/A		#N/A	#N/A	#N/A
GPR182	#N/A	#N/A	#N/A		#N/A	#N/A	#N/A
GPR183	#N/A	#N/A	#N/A		#N/A	#N/A	#N/A
GPR19	#N/A	#N/A	#N/A		#N/A	#N/A	#N/A
GPR20	#N/A	#N/A	#N/A		#N/A	#N/A	#N/A
GPR21	#N/A	#N/A	#N/A		#N/A	#N/A	#N/A
GPR22	#N/A	#N/A	#N/A		#N/A	#N/A	#N/A
GPR25	#N/A	#N/A	#N/A		#N/A	#N/A	#N/A
GPR26	#N/A	#N/A	#N/A		#N/A	Gpr26	#N/A
GPR27	#N/A	#N/A	#N/A		#N/A	#N/A	#N/A
GPR3	#N/A	#N/A	#N/A		#N/A	#N/A	#N/A
GPR31	#N/A	#N/A	#N/A		#N/A	#N/A	#N/A
GPR32	#N/A	#N/A	#N/A		#N/A	#N/A	#N/A
GPR33	#N/A	#N/A	#N/A		#N/A	#N/A	#N/A
GPR34	#N/A	#N/A	#N/A		#N/A	#N/A	#N/A
GPR35	#N/A	Gpr35	Gpr35		#N/A	#N/A	#N/A
GPR37	#N/A	#N/A	#N/A		#N/A	#N/A	#N/A
GPR37L1	#N/A	#N/A	#N/A		#N/A	#N/A	Gpr37l1
GPR39	Gpr39	Gpr39	Gpr39		#N/A	#N/A	#N/A
GPR4	#N/A	#N/A	#N/A		#N/A	#N/A	#N/A
GPR42	#N/A	#N/A	#N/A		#N/A	#N/A	#N/A
GPR45	#N/A	#N/A	#N/A		#N/A	#N/A	#N/A
GPR50	#N/A	#N/A	#N/A		#N/A	#N/A	#N/A
GPR52	#N/A	#N/A	#N/A		#N/A	#N/A	#N/A
GPR55	#N/A	#N/A	Gpr55		#N/A	#N/A	#N/A
GPR6	#N/A	#N/A	#N/A		#N/A	#N/A	#N/A
GPR61	#N/A	#N/A	#N/A		#N/A	#N/A	#N/A
GPR62	#N/A	#N/A	#N/A		Gpr62	Gpr62	Gpr62
GPR63	#N/A	#N/A	#N/A		#N/A	#N/A	#N/A
GPR65	#N/A	Gpr65	Gpr65		#N/A	#N/A	#N/A
GPR68	#N/A	#N/A	#N/A		#N/A	#N/A	#N/A
GPR75	#N/A	#N/A	#N/A		#N/A	#N/A	#N/A
GPR78	#N/A	#N/A	#N/A		#N/A	#N/A	#N/A
GPR82	#N/A	#N/A	#N/A		#N/A	#N/A	#N/A
GPR83	#N/A	#N/A	#N/A		#N/A	#N/A	Gpr83
GPR84	#N/A	#N/A	#N/A		#N/A	#N/A	#N/A
GPR85	#N/A	#N/A	#N/A		#N/A	#N/A	#N/A
GPR87	#N/A	Gpr87	Gpr87		#N/A	#N/A	#N/A
GPR88	#N/A	#N/A	#N/A		#N/A	#N/A	#N/A
GPR89A	#N/A	#N/A	#N/A		#N/A	#N/A	#N/A
GPR89B	#N/A	#N/A	#N/A		#N/A	#N/A	#N/A
GPRC5A	Gprc5a	Gprc5a	#N/A		#N/A	#N/A	#N/A
GPRC5B	#N/A	#N/A	#N/A		#N/A	#N/A	#N/A
GPRC5C	#N/A	#N/A	#N/A		#N/A	#N/A	#N/A
GPRC5D	#N/A	#N/A	#N/A		#N/A	#N/A	#N/A
GPRC6A	#N/A	#N/A	#N/A		#N/A	#N/A	#N/A
GPSM2	#N/A	Gpsm2	Gpsm2		#N/A	#N/A	#N/A
GRAMD1A	#N/A	#N/A	#N/A		#N/A	#N/A	#N/A
GRAMD1B	#N/A	#N/A	#N/A		#N/A	#N/A	#N/A
GRAMD1C	#N/A	#N/A	#N/A		#N/A	#N/A	#N/A
GRAMD2A	#N/A	#N/A	#N/A		#N/A	#N/A	#N/A
GRAMD2B	#N/A	#N/A	#N/A		#N/A	#N/A	#N/A
GRAMD4	#N/A	#N/A	#N/A		#N/A	#N/A	#N/A
GREB1	#N/A	#N/A	Greb1		Greb1	#N/A	#N/A
GRIA1	#N/A	#N/A	#N/A		Gria1	Gria1	Gria1
GRIA2	#N/A	#N/A	#N/A		#N/A	#N/A	#N/A
GRIA3	#N/A	#N/A	#N/A		#N/A	#N/A	#N/A
GRIA4	#N/A	#N/A	#N/A		#N/A	#N/A	#N/A
GRID1	#N/A	#N/A	#N/A		#N/A	#N/A	#N/A
GRID2	Grid2	Grid2	#N/A		#N/A	#N/A	#N/A
GRIK1	#N/A	#N/A	#N/A		#N/A	#N/A	#N/A
GRIK2	#N/A	#N/A	#N/A		#N/A	#N/A	#N/A
GRIK3	#N/A	#N/A	#N/A		#N/A	#N/A	#N/A
GRIK4	#N/A	#N/A	#N/A		#N/A	#N/A	#N/A
GRIK5	#N/A	#N/A	#N/A		#N/A	#N/A	#N/A
GRIN1	#N/A	#N/A	#N/A		#N/A	#N/A	#N/A
GRIN2A	#N/A	#N/A	#N/A		#N/A	#N/A	#N/A
GRIN2B	#N/A	#N/A	#N/A		#N/A	#N/A	#N/A
GRIN2C	#N/A	#N/A	#N/A		#N/A	#N/A	#N/A
GRIN2D	#N/A	#N/A	#N/A		#N/A	#N/A	#N/A
GRIN3A	#N/A	#N/A	#N/A		#N/A	Grin3a	#N/A
GRIN3B	#N/A	#N/A	#N/A		#N/A	#N/A	#N/A
GRINA	#N/A	#N/A	#N/A		#N/A	#N/A	#N/A
GRM1	#N/A	#N/A	#N/A		#N/A	#N/A	#N/A
GRM2	#N/A	#N/A	#N/A		#N/A	#N/A	#N/A
GRM3	#N/A	#N/A	#N/A		#N/A	#N/A	#N/A
GRM4	#N/A	#N/A	#N/A		#N/A	#N/A	#N/A
GRM5	#N/A	#N/A	#N/A		#N/A	#N/A	#N/A
GRM6	#N/A	#N/A	#N/A		#N/A	#N/A	#N/A
GRM7	#N/A	#N/A	#N/A		#N/A	#N/A	#N/A
GRM8	#N/A	#N/A	#N/A		#N/A	#N/A	#N/A
GRPR	#N/A	#N/A	#N/A		#N/A	#N/A	#N/A
GSG1	#N/A	#N/A	#N/A		#N/A	#N/A	#N/A
GSG1L	#N/A	Gsg1l	#N/A		#N/A	#N/A	#N/A
GSG1L2	#N/A	#N/A	#N/A		#N/A	#N/A	#N/A
GSTCD	#N/A	#N/A	#N/A		#N/A	#N/A	#N/A
GTF3C1	#N/A	#N/A	#N/A		#N/A	#N/A	#N/A
GTF3C3	#N/A	#N/A	#N/A		#N/A	#N/A	#N/A
GUCY2C	#N/A	Gucy2c	Gucy2c		#N/A	#N/A	#N/A
GUCY2D	#N/A	#N/A	#N/A		#N/A	#N/A	#N/A
GUCY2F	#N/A	#N/A	#N/A		#N/A	#N/A	#N/A
GULP1	#N/A	#N/A	#N/A		#N/A	#N/A	#N/A
GYPA	#N/A	#N/A	#N/A		#N/A	#N/A	#N/A
GYPB	#N/A	#N/A	#N/A		#N/A	#N/A	#N/A
GYPC	#N/A	#N/A	#N/A		#N/A	#N/A	#N/A
GYPE	#N/A	#N/A	#N/A		#N/A	#N/A	#N/A
HACD1	#N/A	#N/A	#N/A		#N/A	#N/A	#N/A
HACD2	#N/A	#N/A	#N/A		#N/A	#N/A	#N/A
HACD3	#N/A	#N/A	#N/A		#N/A	#N/A	#N/A
HACD4	#N/A	#N/A	#N/A		#N/A	#N/A	#N/A
HAPLN3	#N/A	#N/A	#N/A		#N/A	#N/A	#N/A
HAS1	#N/A	#N/A	#N/A		#N/A	#N/A	#N/A
HAS2	#N/A	#N/A	#N/A		#N/A	#N/A	#N/A
HAS3	Has3	Has3	Has3		#N/A	#N/A	#N/A
HAVCR1	Havcr1	Havcr1	Havcr1		#N/A	#N/A	#N/A
HAVCR2	#N/A	#N/A	#N/A		#N/A	#N/A	#N/A
HBD	#N/A	#N/A	#N/A		#N/A	#N/A	#N/A
HBEGF	#N/A	#N/A	#N/A		#N/A	#N/A	#N/A
HBS1L	#N/A	#N/A	#N/A		#N/A	#N/A	#N/A
HCAR1	#N/A	#N/A	#N/A		#N/A	#N/A	#N/A
HCAR2	#N/A	#N/A	#N/A		#N/A	#N/A	#N/A
HCAR3	#N/A	#N/A	#N/A		#N/A	#N/A	#N/A
HCN1	#N/A	#N/A	#N/A		#N/A	#N/A	#N/A
HCN2	Hcn2	Hcn2	Hcn2		#N/A	#N/A	#N/A
HCN3	#N/A	#N/A	#N/A		#N/A	#N/A	#N/A
HCN4	#N/A	#N/A	#N/A		#N/A	#N/A	#N/A
HCRTR1	#N/A	#N/A	#N/A		#N/A	#N/A	#N/A
HCRTR2	#N/A	#N/A	#N/A		#N/A	#N/A	#N/A
HCST	#N/A	#N/A	#N/A		#N/A	#N/A	#N/A
HDAC10	#N/A	#N/A	#N/A		#N/A	#N/A	#N/A
HEATR5A	#N/A	#N/A	#N/A		#N/A	#N/A	#N/A
HECTD4	#N/A	#N/A	#N/A		#N/A	#N/A	#N/A
HEG1	#N/A	#N/A	#N/A		#N/A	#N/A	#N/A
HELZ	#N/A	#N/A	#N/A		#N/A	#N/A	#N/A
HEPACAM	#N/A	#N/A	#N/A		#N/A	#N/A	#N/A
HEPACAM2	#N/A	#N/A	#N/A		#N/A	#N/A	#N/A
HEPH	#N/A	Heph	#N/A		#N/A	#N/A	#N/A
HEPHL1	#N/A	#N/A	#N/A		#N/A	#N/A	#N/A
HERC2	#N/A	#N/A	#N/A		#N/A	#N/A	#N/A
HERC4	#N/A	#N/A	#N/A		#N/A	#N/A	#N/A
HERC5	#N/A	#N/A	#N/A		#N/A	#N/A	#N/A
HERC6	Herc6	Herc6	Herc6		#N/A	#N/A	#N/A
HERPUD1	#N/A	#N/A	#N/A		#N/A	Herpud1	Herpud1
HERPUD2	#N/A	#N/A	#N/A		#N/A	#N/A	#N/A
HFE	#N/A	#N/A	#N/A		#N/A	#N/A	#N/A
HFE2	#N/A	#N/A	#N/A		#N/A	#N/A	#N/A
HGSNAT	#N/A	#N/A	#N/A		#N/A	#N/A	#N/A
HHAT	#N/A	#N/A	#N/A		#N/A	#N/A	#N/A
HHATL	#N/A	#N/A	#N/A		#N/A	#N/A	#N/A
HHIP	#N/A	#N/A	#N/A		Hhip	Hhip	Hhip
HHLA2	#N/A	#N/A	#N/A		#N/A	#N/A	#N/A
HIGD1A	#N/A	#N/A	#N/A		#N/A	#N/A	#N/A
HIGD1B	#N/A	#N/A	Higd1b		#N/A	#N/A	#N/A
HIGD1C	#N/A	#N/A	#N/A		#N/A	#N/A	#N/A
HIGD2A	#N/A	#N/A	#N/A		#N/A	#N/A	#N/A
HIGD2B	#N/A	#N/A	#N/A		#N/A	#N/A	#N/A
HILPDA	#N/A	#N/A	#N/A		#N/A	#N/A	#N/A
HIPK1	#N/A	#N/A	#N/A		#N/A	#N/A	#N/A
HIPK2	#N/A	#N/A	#N/A		#N/A	#N/A	#N/A
HIPK3	#N/A	#N/A	#N/A		#N/A	#N/A	#N/A
HLA-A	#N/A	#N/A	#N/A		#N/A	#N/A	#N/A
HLA-B	#N/A	#N/A	#N/A		#N/A	#N/A	#N/A
HLA-C	#N/A	#N/A	#N/A		#N/A	#N/A	#N/A
HLA-DMA	#N/A	#N/A	#N/A		#N/A	#N/A	#N/A
HLA-DMB	#N/A	#N/A	#N/A		#N/A	#N/A	#N/A
HLA-DOA	#N/A	#N/A	#N/A		#N/A	#N/A	#N/A
HLA-DOB	#N/A	#N/A	#N/A		#N/A	#N/A	#N/A
HLA-DPA1	#N/A	#N/A	#N/A		#N/A	#N/A	#N/A
HLA-DPB1	#N/A	#N/A	#N/A		#N/A	#N/A	#N/A
HLA-DQA1	#N/A	#N/A	#N/A		#N/A	#N/A	#N/A
HLA-DQA2	#N/A	#N/A	#N/A		#N/A	#N/A	#N/A
HLA-DQB1	#N/A	#N/A	#N/A		#N/A	#N/A	#N/A
HLA-DQB2	#N/A	#N/A	#N/A		#N/A	#N/A	#N/A
HLA-DRA	#N/A	#N/A	#N/A		#N/A	#N/A	#N/A
HLA-DRB1	#N/A	#N/A	#N/A		#N/A	#N/A	#N/A
HLA-DRB5	#N/A	#N/A	#N/A		#N/A	#N/A	#N/A
HLA-E	#N/A	#N/A	#N/A		#N/A	#N/A	#N/A
HLA-F	#N/A	#N/A	#N/A		#N/A	#N/A	#N/A
HLA-G	#N/A	#N/A	#N/A		#N/A	#N/A	#N/A
HM13	#N/A	#N/A	#N/A		#N/A	#N/A	#N/A
HMGCR	#N/A	#N/A	#N/A		#N/A	#N/A	#N/A
HMOX1	#N/A	#N/A	Hmox1		#N/A	#N/A	#N/A
HMOX2	#N/A	#N/A	#N/A		#N/A	#N/A	#N/A
HOXC11	#N/A	#N/A	#N/A		#N/A	#N/A	#N/A
HPN	Hpn	Hpn	Hpn		#N/A	#N/A	#N/A
HPS3	#N/A	#N/A	#N/A		#N/A	#N/A	#N/A
HRASLS	#N/A	#N/A	#N/A		#N/A	#N/A	#N/A
HRASLS2	#N/A	#N/A	#N/A		#N/A	#N/A	#N/A
HRH1	#N/A	#N/A	#N/A		#N/A	#N/A	#N/A
HRH2	#N/A	#N/A	#N/A		#N/A	#N/A	#N/A
HRH3	#N/A	#N/A	#N/A		#N/A	Hrh3	Hrh3
HRH4	#N/A	#N/A	#N/A		#N/A	#N/A	#N/A
HRK	#N/A	#N/A	#N/A		#N/A	#N/A	#N/A
HS3ST4	#N/A	#N/A	#N/A		#N/A	#N/A	#N/A
HS6ST2	#N/A	#N/A	#N/A		#N/A	#N/A	#N/A
HSD11B1L	#N/A	#N/A	#N/A		#N/A	#N/A	#N/A
HSD11B2	Hsd11b2	Hsd11b2	Hsd11b2		#N/A	#N/A	#N/A
HSD17B12	#N/A	#N/A	#N/A		#N/A	#N/A	#N/A
HSD17B2	#N/A	#N/A	Hsd17b2		#N/A	#N/A	#N/A
HSD17B3	#N/A	#N/A	#N/A		#N/A	#N/A	#N/A
HSD17B7	#N/A	#N/A	#N/A		#N/A	#N/A	#N/A
HSD3B1	#N/A	#N/A	#N/A		#N/A	#N/A	#N/A
HSD3B2	#N/A	#N/A	#N/A		#N/A	#N/A	#N/A
HSD3B7	#N/A	#N/A	#N/A		#N/A	#N/A	#N/A
HSDL1	#N/A	#N/A	#N/A		#N/A	#N/A	#N/A
HTATIP2	#N/A	#N/A	#N/A		#N/A	#N/A	#N/A
HTR1A	#N/A	#N/A	#N/A		#N/A	#N/A	#N/A
HTR1B	#N/A	#N/A	#N/A		#N/A	#N/A	#N/A
HTR1D	Htr1d	Htr1d	Htr1d		#N/A	#N/A	#N/A
HTR1E	#N/A	#N/A	#N/A		#N/A	#N/A	#N/A
HTR1F	#N/A	#N/A	#N/A		#N/A	#N/A	#N/A
HTR2A	#N/A	#N/A	#N/A		#N/A	#N/A	#N/A
HTR2B	#N/A	#N/A	#N/A		#N/A	#N/A	#N/A
HTR2C	#N/A	#N/A	#N/A		#N/A	#N/A	#N/A
HTR3A	#N/A	#N/A	#N/A		#N/A	Htr3a	Htr3a
HTR3B	#N/A	#N/A	#N/A		#N/A	#N/A	#N/A
HTR3C	#N/A	#N/A	#N/A		#N/A	#N/A	#N/A
HTR3D	#N/A	#N/A	#N/A		#N/A	#N/A	#N/A
HTR3E	#N/A	#N/A	#N/A		#N/A	#N/A	#N/A
HTR4	#N/A	#N/A	#N/A		#N/A	#N/A	#N/A
HTR5A	#N/A	#N/A	#N/A		#N/A	#N/A	#N/A
HTR6	#N/A	#N/A	#N/A		#N/A	#N/A	#N/A
HTR7	#N/A	#N/A	#N/A		#N/A	#N/A	#N/A
HTRA2	#N/A	#N/A	#N/A		#N/A	#N/A	#N/A
HTT	#N/A	#N/A	#N/A		#N/A	#N/A	#N/A
HUWE1	#N/A	#N/A	#N/A		#N/A	#N/A	#N/A
HVCN1	#N/A	#N/A	#N/A		#N/A	#N/A	#N/A
HYAL2	#N/A	#N/A	#N/A		#N/A	#N/A	#N/A
HYAL4	#N/A	#N/A	#N/A		#N/A	#N/A	#N/A
ICA1	#N/A	#N/A	#N/A		#N/A	#N/A	#N/A
ICAM1	Icam1	Icam1	Icam1		#N/A	#N/A	#N/A
ICAM2	#N/A	#N/A	#N/A		#N/A	#N/A	#N/A
ICAM3	#N/A	#N/A	#N/A		#N/A	#N/A	#N/A
ICAM4	#N/A	#N/A	#N/A		#N/A	#N/A	#N/A
ICAM5	#N/A	#N/A	Icam5		#N/A	#N/A	#N/A
ICMT	#N/A	#N/A	#N/A		#N/A	#N/A	#N/A
ICOS	#N/A	#N/A	Icos		#N/A	#N/A	#N/A
ICOSLG	#N/A	#N/A	#N/A		#N/A	#N/A	#N/A
IER3	#N/A	Ier3	Ier3		#N/A	#N/A	#N/A
IER3IP1	#N/A	#N/A	#N/A		#N/A	#N/A	#N/A
IFI27	#N/A	#N/A	#N/A		#N/A	#N/A	#N/A
IFI30	#N/A	#N/A	#N/A		#N/A	#N/A	#N/A
IFI6	#N/A	#N/A	#N/A		#N/A	#N/A	#N/A
IFITM1	#N/A	#N/A	#N/A		#N/A	#N/A	#N/A
IFITM10	#N/A	#N/A	#N/A		#N/A	#N/A	#N/A
IFITM2	#N/A	#N/A	#N/A		#N/A	#N/A	#N/A
IFITM3	#N/A	Ifitm3	Ifitm3		#N/A	#N/A	#N/A
IFITM5	#N/A	#N/A	#N/A		#N/A	#N/A	#N/A
IFNAR1	#N/A	#N/A	#N/A		#N/A	#N/A	#N/A
IFNAR2	#N/A	#N/A	#N/A		#N/A	#N/A	#N/A
IFNGR1	#N/A	#N/A	#N/A		#N/A	#N/A	#N/A
IFNGR2	#N/A	#N/A	#N/A		#N/A	#N/A	#N/A
[truncated: 3,522 more rows]

## Sheet: Upregulated MP
AP - upregulated				DP - upregulated				LP - upregulated				VP - upregulated
mPIN	MT	AT		mPIN	MT	AT		mPIN	MT	AT		mPIN	MT	AT
Abcc5	Abcc1	Abcc1		Abcc5	Abcc5	Abca4		Aadacl3	Aadacl3	Abcc5		Aadacl3	Abcc1	Abcc5
Abcg1	Abcc5	Abcc5		Abcg1	Abcg1	Abcc5		Abcc5	Abcc5	Abcc8		Abcg1	Abcc5	Abcg1
Abcg5	Abcd3	Abcg1		Abcg5	Abcg5	Abcg1		Abcg1	Abcd4	Abcg1		Abcg5	Abcg1	Abcg2
Abcg8	Abcg1	Abcg5		Abcg8	Abcg8	Acer3		Abcg5	Abcg1	Abcg5		Abcg8	Abcg5	Abcg5
Abo	Abcg5	Abcg8		Acer3	Acer3	Adam12		Abcg8	Abcg5	Abcg8		Adora2b	Abcg8	Abcg8
Acer3	Abcg8	Abo		Acsm1	Acsm1	Adam8		Acer3	Abcg8	Acer3		Adrb1	Acsm1	Adam8
Acsm1	Abo	Acer3		Adcy8	Adcy8	Adamts4		Adam10	Acer3	Adam12		Atp10b	Adam10	Adamts4
Adam28	Acer3	Ache		Adora2b	Adora2b	Adcy8		Adam8	Adam12	Adam8		Atp2a3	Adam8	Adcy3
Adcy8	Acsm1	Acsm1		Adrb1	Adrb1	Adora2b		Adcy8	Adam8	Adamts4		Atp4a	Adcy8	Adora2a
Adora2b	Adam28	Adam28		Agpat2	Agrn	Ager		Adora2b	Adamts4	Adcy8		B3galt2	Adra2a	Adora2b
Adrb1	Adam8	Adam8		Aldh3b2	Aldh3b2	Alg14		Adra2a	Adcy8	Adora2b		B4galnt2	Adrb1	Adrb1
Agrn	Adcy8	Adcy3		Alpk1	Alpk1	Alpk1		Adrb1	Adora2b	Adrb1		Bace2	Agrn	Alpk1
Aldh3b2	Adora2b	Adcy8		Ankle1	Ankle1	Amn		Aldoa	Adra2a	Ager		Best2	Alpk1	Amhr2
Alpk1	Adrb1	Adora2b		Ano9	Ano9	Ankle1		Alpk1	Adrb1	Alg14		Btc	Amhr2	Amn
Ankle1	Agpat2	Adrb1		Anpep	Anpep	Ano9		Ankle1	Alpk1	Alpk1		Cacna2d4	Ankle1	Ankle1
Ano1	Agrn	Agrn		Atp10b	Aqp5	Anpep		Anpep	Amn	Amn		Cd200r1	Ano4	Antxr2
Ano9	Aldh3b2	Aldh3b2		Atp1a1	Atp10b	Aqp3		Areg	Ankle1	Ankle1		Cd44	Ano9	Aplp1
Anpep	Alpk1	Alpk1		Atp1b1	Atp1a1	Areg		Atp10b	Anpep	Anpep		Cdh1	Atp10b	Arhgap42
Aplp1	Ankle1	Amn		Atp2a3	Atp1b1	Arhgap42		Atp2a3	Aplp1	Aplp1		Cdhr1	Atp13a5	Armcx2
Aqp4	Ano1	Ankle1		Atp2c2	Atp2a3	Asgr2		Atp4a	Areg	Areg		Celsr1	Atp2a3	Atp10b
Aqp5	Ano6	Ano1		B3galt2	Atp2c2	Atg9b		B3galt2	Atp10b	Atg9b		Cers3	Atp4a	Atp6v0a4
Asb11	Ano9	Ano6		B4galnt2	B3galt2	Atp10a		B4galnt2	Atp2a3	Atp10b		Cftr	Atp6v0a4	Bak1
Atp10b	Anpep	Ano9		Bace2	B4galnt2	Atp10b		Bace2	Atp6v0a4	Atp2a3		Chl1	Bace2	Bean1
Atp1a1	Aplp1	Anpep		Best2	Bace2	Atp8b4		Bak1	Atp8a2	Atp8a2		Clec5a	Bak1	Bok
Atp2a3	Aqp4	Aplp1		Bsg	Best2	B4galt1		Best2	B3galt2	Atp8b4		Col25a1	Bok	Bst2
Atp2c2	Aqp5	Aqp4		Btc	Bsg	Bak1		Bnip3	B4galt1	B4galt1		Cxcl16	Bst2	Btc
Atp4a	Areg	Aqp5		Cacna2d4	Btc	Best2		Btc	Bace2	Bak1		Cyba	Btc	Cacna1b
Atp6ap2	Asb11	Areg		Cadm1	Cacna2d4	Bok		Cacna2d4	Bak1	Bdnf		Dhrs9	Cacna1b	Cacna2d4
Atp6v0a4	Atg9b	Asb11		Camk1d	Cadm1	Bst2		Cadm1	Bdnf	Bok		Dio1	Cacna2d4	Ccl7
Atrn	Atp10b	Atg9b		Catsper4	Camk1d	Btc		Cd200r1	Bok	Bst2		Efnb2	Ccr1	Ccr1
B3galt2	Atp1a1	Atp10b		Catsperd	Casd1	C5ar2		Cd276	Bst2	Btc		Epha2	Ccr5	Ccr5
B4galnt2	Atp2a3	Atp1a1		Cd276	Catsper4	Cadm4		Cd44	Btc	C3ar1		Epha4	Cd200r1	Cd200r1
Bace2	Atp2c2	Atp2a3		Cdh1	Catsperd	Ccl5		Cdh1	C5ar2	C5ar1		Epsti1	Cd276	Cd244
Best2	Atp4a	Atp2c2		Cdh17	Cd276	Ccl7		Cdh17	Cacna2d4	C5ar2		Ern2	Cd44	Cd276
Bik	Atp6v0a4	Atp4a		Cdh24	Cd44	Ccr1		Cdh24	Ccl5	Cacna1b		Espl1	Cd72	Cd44
Bnip3	Atrn	Atp6v0a4		Celsr1	Cdh1	Ccr2		Cdhr1	Ccl7	Cacna2d4		Eva1a	Cd74	Cd52
Bnipl	B3galt2	Atp8a2		Cftr	Cdh17	Ccr5		Celsr1	Ccr1	Ccl7		F3	Cd86	Cd69
Bri3	B4galnt2	Atrn		Chl1	Cdh24	Ccr7		Cftr	Ccr5	Ccr1		Fa2h	Cdh1	Cd72
Bsg	Bace2	B3galt2		Chodl	Cdhr1	Cd101		Ch25h	Ccr7	Ccr5		Fam57a	Cdh17	Cdh17
Bsnd	Bak1	B4galnt2		Chst9	Cdhr5	Cd244		Chek2	Cd200r1	Ccr7		Fanca	Cdh24	Cdh24
Btc	Best2	Bace2		Clcn2	Celsr1	Cd276		Chl1	Cd274	Cd180		Ffar4	Cdhr1	Cdhr1
Cacna2d4	Bnip3	Bak1		Cldn6	Celsr2	Cd300lf		Chst9	Cd276	Cd200r1		Folr1	Cdhr2	Cdhr2
Cadm1	Bnipl	Bcam		Clec5a	Cftr	Cd3g		Clcn2	Cd300lf	Cd22		Fut4	Celsr1	Celsr1
Cadm4	Bsg	Best2		Clmn	Ch25h	Cd44		Cldn2	Cd3e	Cd244		Gabrp	Cers3	Celsr3
Camk1d	Btc	Bok		Cln3	Chl1	Cd63		Cldn7	Cd44	Cd274		Gde1	Cftr	Cftr
Catsperd	Cacna1b	Bsg		Col25a1	Chodl	Cd69		Clec5a	Cd6	Cd276		Gdpd5	Ch25h	Ch25h
Cd164	Cacna2d4	Btc		Creb3l4	Chst9	Cd72		Clmn	Cd69	Cd300a		Gp2	Chl1	Chl1
Cd276	Cadm1	Cacna2d4		Cx3cl1	Clcn2	Cd74		Col25a1	Cd72	Cd300ld		Gpa33	Chrnb1	Chrnb1
Cd44	Cadm2	Cadm4		Cxadr	Cldn10	Cd83		Csf2ra	Cd74	Cd300lf		Gpr39	Chst9	Clca4
Cdh1	Cadm4	Ccl5		Cxcl16	Clec5a	Cd86		Cx3cl1	Cdh17	Cd40		Gprc5a	Clca2	Cldn2
Cdh17	Camk1d	Ccr1		Cxcr4	Clmn	Cd8a		Cxadr	Cdh24	Cd44		Grid2	Clca4	Clec4e
Cdh24	Casd1	Ccr5		Cyba	Cln3	Cd93		Cxcl16	Cdhr1	Cd48		Has3	Clcn2	Clec5a
Cdhr1	Catsperd	Ccr7		Dapl1	Col25a1	Cd96		Cyba	Cdhr5	Cd53		Havcr1	Cldn2	Clrn3
Celsr1	Ccr1	Cd101		Dgat2	Coq7	Cdh11		Dapl1	Celsr1	Cd68		Hcn2	Cldn7	Cntfr
Celsr2	Ccr5	Cd276		Dhcr24	Csf3r	Cdh17		Dcbld1	Celsr3	Cd69		Herc6	Clec4e	Col25a1
Cept1	Cd101	Cd33		Dhcr7	Cx3cl1	Cdh24		Dhcr24	Cftr	Cd72		Hpn	Clec5a	Cox7a1
Cers5	Cd276	Cd44		Dhrs3	Cxadr	Cdh3		Dhcr7	Ch25h	Cd74		Hsd11b2	Clrn3	Csf3r
Cftr	Cd44	Cd47		Dhrs9	Cxcl16	Cdhr2		Dhrs3	Chek2	Cd83		Htr1d	Cntfr	Cwh43
Chl1	Cd72	Cd72		Dio1	Cxcr4	Cdhr5		Dhrs9	Chst9	Cd86		Icam1	Col17a1	Cxcl16
Chodl	Cdh1	Cd74		Dram1	Cyba	Celsr1		Dnajc22	Clcn2	Cdh11		Ikzf1	Col25a1	Cxcr4
Chrnb1	Cdh17	Cd83		Dram2	Cysltr2	Cftr		Dram1	Cldn15	Cdh17		Insrr	Csf1	Cyba
Chst9	Cdh24	Cd86		Emp2	Dapl1	Ch25h		Efnb2	Cldn2	Cdh24		Itga2	Csf3r	Cyp7b1
Clcn2	Cdhr1	Cdh1		Entpd8	Dcbld1	Chodl		Emp2	Clec4e	Cdh3		Itgb6	Cwh43	Cysltr2
Cldn10	Cdhr5	Cdh17		Epha2	Dgat2	Chrnb1		Entpd8	Clec5a	Cdhr5		Jakmip1	Cx3cr1	Dapk2
Clec5a	Celsr1	Cdh24		Epha4	Dhcr24	Clcn2		Epha2	Clmn	Celsr1		Kcne3	Cxadr	Dclk1
Clmn	Celsr2	Cdhr1		Ephb2	Dhcr7	Cldn10		Epha4	Clrn3	Cep170		Kcnk5	Cxcl16	Dhrs9
Cln3	Cept1	Cdhr5		Ephb3	Dhrs3	Clec4e		Ephb2	Col25a1	Cftr		Lpcat4	Cxcr4	Dio1
Cmtm8	Cers5	Celsr1		Ephb6	Dhrs9	Clec5a		Ephb3	Csf2ra	Ch25h		Lrfn4	Cyba	Disp1
Cnnm4	Cftr	Celsr2		Epsti1	Dio1	Clmn		Epsti1	Csf3r	Chek2		Ly6d	Cyp7b1	Dll4
Cnr1	Chl1	Cers5		Ermp1	Dnajc22	Cln3		Ermp1	Cx3cr1	Chrnb1		Ly6e	Cysltr2	Dnajc22
Col25a1	Chodl	Cftr		Ern2	Dram1	Cmtm3		Ern2	Cxadr	Clcn2		Ly6k	Dapk2	Dram1
Coq7	Chrnb1	Ch25h		Espl1	Dram2	Csf3r		Espl1	Cxcl16	Cldn15		Map3k1	Dapl1	Dsc2
Csf3r	Chst9	Chl1		Eva1a	Dsc3	Cx3cr1		Eva1a	Cxcr4	Cldn2		Mcoln3	Dcbld1	Ecscr
Cx3cl1	Clcn2	Chodl		F2rl1	Emp2	Cxcl16		F2rl1	Cyba	Clec4e		Melk	Dclk1	Efnb2
Cxadr	Cldn10	Chrnb1		F3	Entpd8	Cxcr2		F3	Dapk2	Clec5a		Mmp15	Dhrs9	Entpd8
Cxcl16	Cldn2	Chst9		Fa2h	Epha2	Cxcr4		Fa2h	Dapl1	Clmn		Msln	Dio1	Eogt
Cxcr4	Cldn7	Clcn2		Fam3b	Epha4	Cyba		Fam3b	Dcbld1	Clrn3		Muc1	Dll4	Epha2
Cyba	Clec5a	Cldn10		Fam57a	Ephb2	Cysltr2		Fam57a	Dclk1	Cnih2		Muc13	Dnajc22	Epha4
Cyp2s1	Clmn	Cldn2		Fcamr	Ephb3	Dapl1		Fanca	Dhcr24	Cnr2		Myof	Dram1	Ephb2
Dapk2	Cln3	Cldn7		Ffar2	Ephb6	Dhcr24		Ffar4	Dhrs3	Col25a1		Pigr	Dsc2	Epsti1
Dapl1	Cnnm4	Clec4e		Ffar4	Epsti1	Dhrs9		Fgfr3	Dhrs9	Csf2ra		Pkmyt1	Dsc3	Ern2
Dcbld1	Cnr1	Clec5a		Fgfr3	Ermp1	Dio1		Fmo3	Dio1	Csf2rb		Qsox1	Ecscr	Espl1
Dgat2	Col17a1	Clmn		Fmo3	Ern2	Disp1		Folr1	Dll4	Csf3r		Rnf122	Efnb1	Eva1a
Dhcr24	Col25a1	Cln3		Fndc5	Espl1	Dll4		Frrs1	Dnajc22	Cspg4		Rnf150	Efnb2	F3
Dhrs3	Coq7	Cmtm7		Fut4	Eva1a	Dnajc22		Fut4	Dram1	Ctxn1		Rnf183	Endod1	Fa2h
Dhrs9	Csf3r	Cnnm2		Fxyd3	F2rl1	Dram1		Gabre	Dsc2	Cwh43		Rnf213	Entpd8	Fads6
Dok7	Cx3cl1	Cnnm4		Gabre	F3	Dsc2		Gabrp	Dsc3	Cx3cr1		Rnf223	Epha2	Fam189a2
Dram1	Cx3cr1	Cnr1		Gabrp	Fa2h	Ecscr		Galnt14	Duox2	Cxcl16		Rtp4	Epha4	Fam57a
Dram2	Cxadr	Col17a1		Galnt3	Fam3b	Efnb1		Gcnt3	Duoxa2	Cxcr4		Slc10a2	Ephb2	Fanca
Dsc3	Cxcl16	Col25a1		Gcnt3	Fam57a	Emp1		Gde1	Efnb1	Cyba		Slc16a3	Epsti1	Fcer1g
Efna3	Cxcr2	Csf3r		Gde1	Fcamr	Entpd8		Gdpd5	Efnb2	Cybb		Slc23a3	Ern2	Ffar4
Efna4	Cxcr4	Cx3cl1		Gdpd1	Ffar4	Epha2		Gfra1	Entpd8	Dapk2		Slc25a48	Espl1	Flt4
Efnb1	Cyba	Cx3cr1		Ggt6	Fgfr3	Ephb2		Gjb2	Epha2	Dapl1		Slc27a3	Eva1a	Folr1
Emp2	Cyp2s1	Cxadr		Gjb2	Fmo3	Ephb3		Gjb4	Epha4	Dcakd		Slc34a2	F3	Fpr2
Epha2	Cysltr2	Cxcl16		Gjb4	Fndc5	Epsti1		Gp2	Ephb2	Dcbld1		Slc39a4	Fa2h	Frrs1
Epha4	Dapk2	Cxcr4		Gjb6	Fras1	Ern2		Gpa33	Ephb3	Dclk1		Slc39a8	Fam57a	Fut4
Ephb2	Dapl1	Cyba		Gne	Frem2	Espl1		Gpr39	Epsti1	Dcstamp		Slc40a1	Fanca	Fxyd4
Ephb3	Dcbld1	Cysltr2		Gp2	Frrs1	F2rl1		Gpr87	Ern2	Dhcr24		Slc9a5	Ffar4	Fxyd6
Ephb6	Dclk1	Dapk2		Gpa33	Fut4	F3		Gprc5a	Espl1	Dhcr7		Smim6	Folr1	Gabre
Epsti1	Dclk3	Dapl1		Gpr83	Fxyd3	Fam105a		Grid2	Eva1a	Dhrs9		Sptlc3	Frem2	Gabrg3
Ermp1	Dgat2	Dcbld1		Gprc5a	Gabre	Fam57a		Grin1	F2rl1	Dio1		Sqle	Frrs1	Gabrp
Ern2	Dhcr24	Dclk1		Grid2	Gabrp	Fcer1g		Has3	F3	Dll4		Steap4	Fut4	Gcnt3
Espl1	Dhcr7	Dgat2		Grin1	Galnt3	Fcgr2b		Hbegf	Fa2h	Dnajc22		Styk1	Fut9	Gde1
Eva1a	Dhrs3	Dhcr24		Has3	Gcnt3	Fcgrt		Hcn2	Fam3b	Donson		Syt16	Fxyd4	Gimap1
F2rl1	Dhrs9	Dhcr7		Hepacam2	Gde1	Ffar4		Herc6	Fam57a	Dpep2		Syt8	Gabre	Glipr1
F3	Dll4	Dhrs3		Hpn	Gdpd1	Fmnl1		Hpn	Fanca	Dpy19l1		Tacstd2	Gabrg3	Gp2
Fa2h	Dok7	Dhrs9		Hsd11b2	Ggt6	Fpr2		Hsd11b2	Fcer1g	Dram1		Tcirg1	Gabrp	Gpa33
Fads6	Dram1	Dll4		Htr1d	Gjb2	Frrs1		Htr1d	Ffar2	Dsc2		Tfrc	Galnt14	Gpc1
Fam3b	Dram2	Dok7		Icam1	Gjb4	Fzd1		Icam1	Ffar4	Duox2		Tlr1	Gcnt3	Gpr137c
Fam57a	Dsc3	Dram1		Ifngr2	Gjb6	Gabre		Igsf11	Fmnl1	Duoxa2		Tlr2	Gde1	Gpr141
Fam69a	Duox2	Dram2		Igsf11	Gne	Gabrp		Ikzf1	Fmo4	Efnb1		Tmc5	Gdpd5	Gpr171
Fat2	Duoxa2	Dsc3		Igsf9	Gp2	Galnt3		Il13ra1	Folr1	Efnb2		Tmem40	Gfra1	Gpr176
Fcamr	Ece1	Duox2		Ikzf1	Gpa33	Galr2		Insrr	Frrs1	Entpd8		Tmem71	Gp2	Gpr35
Ffar4	Efna3	Duoxa2		Il10rb	Gpr35	Gcnt3		Itga2	Fut4	Epha2		Tmie	Gpa33	Gpr39
Fgfr3	Efna4	Ece1		Il13ra1	Gpr39	Gdpd2		Itgb6	Fxyd4	Ephb2		Tmprss2	Gpr137c	Gpr55
Fmo3	Efnb1	Ecscr		Il22ra1	Gpr83	Ggt6		Itpr2	Gabre	Ephb3		Tmprss4	Gpr141	Gpr65
Fndc5	Efnb2	Efna3		Inpp5j	Gpr87	Gimap1		Jakmip1	Gabrp	Epsti1		Tmprss6	Gpr171	Gpr87
Fras1	Emp2	Efna4		Insrr	Gprc5a	Gja5		Kcne3	Galnt14	Ern2		Tnfrsf12a	Gpr176	Gpsm2
Frem2	Epha2	Efnb1		Itga2	Grid2	Gjb4		Kcnh3	Gcnt3	Espl1		Tnfsf10	Gpr35	Greb1
Fsd1l	Epha4	Emp2		Itgb6	Grin1	Gpa33		Kcnh6	Gde1	Evi2a		Trim59	Gpr39	Gucy2c
Fut4	Ephb2	Epha2		Itpr2	Has3	Gpc1		Kcnk5	Ggt6	F2rl1		Tspan8	Gpr65	Has3
Fxyd3	Ephb3	Epha4		Itpripl1	Hepacam2	Gpc4		Kcnq1	Gjb4	F3		Tuba8	Gpr87	Havcr1
Fxyd6	Ephb6	Ephb2		Jakmip1	Hpn	Gpr137b		Klrg2	Golt1a	Fa2h		Uba7	Gprc5a	Hcn2
Gabbr1	Epsti1	Ephb3		Kcne3	Hsd11b2	Gpr141		Leng8	Gp2	Fam57a		Ugt1a1	Gpsm2	Herc6
Gabre	Ermp1	Ephb6		Kcnh3	Htr1d	Gpr171		Lgr4	Gpa33	Fanca		Vsig1	Grid2	Higd1b
Gabrp	Ern2	Epsti1		Kcnh6	Icam1	Gpr176		Lman1l	Gpr141	Fcer1g		Vtcn1	Gsg1l	Hmox1
Galnt14	Espl1	Ermp1		Kcnk5	Ifitm3	Gpr183		Lpar2	Gpr171	Fcgr2b		Xkr9	Gucy2c	Hpn
Galnt3	Eva1a	Ern2		Kcnn4	Igsf11	Gpr35		Lpcat4	Gpr176	Ffar4			Has3	Hsd11b2
Gcnt3	F2rl1	Espl1		Kcnq1	Igsf9	Gpr65		Lrfn4	Gpr18	Fmnl1			Havcr1	Hsd17b2
Gdap1l1	F3	Eva1a		Klrg2	Ikzf1	Gpr84		Lrtm2	Gpr35	Fpr2			Hcn2	Htr1d
Gde1	Fa2h	F2rl1		Lgr4	Il10rb	Gpr87		Ly6d	Gpr39	Frrs1			Heph	Icam1
Gdpd1	Fads6	F3		Lman1l	Il13ra1	Gprc5a		Ly6k	Gpr65	Gabbr1			Herc6	Icam5
Ggt6	Fam3b	Fa2h		Lpar2	Il22ra1	Has3		Ly75	Gpr87	Gabre			Hpn	Icos
Gjb3	Fam57a	Faim2		Lpcat4	Inpp5j	Hcst		Mal2	Gprc5a	Gabrp			Hsd11b2	Ier3
Gjb4	Fat1	Fam105a		Lrrc26	Insrr	Heph		Mall	Gpsm2	Gcnt3			Htr1d	Ifitm3
Gjb6	Fat2	Fam213a		Lrrc8e	Itga2	Hhat		Map3k1	Gucy2c	Gde1			Icam1	Igdcc4
Gne	Fcamr	Fam3b		Ltk	Itgb4	Higd1b		Mapkapk3	Has3	Ggt6			Ier3	Igsf11
Gp2	Ffar4	Fam57a		Ly6d	Itgb6	Hilpda		Mast1	Hcn1	Gjb4			Ifitm3	Igsf8
Gpa33	Fgfr3	Fat1		Ly6e	Itpr2	Hmox1		Mboat2	Hcn2	Gp1bb			Igdcc4	Igsf9b
Gpr137b	Fmo3	Fat2		Ly6k	Itpr3	Hsd11b2		Melk	Heph	Gp2			Igsf11	Il10ra
Gpr155	Fndc5	Fcamr		Ly75	Itpripl1	Hsd3b7		Mgarp	Herc6	Gpa33			Igsf8	Il18rap
Gpr65	Fras1	Fcer1g		Map3k1	Jakmip1	Htra2		Mgat5	Hhat	Gpr137b			Igsf9	Il21r
Gpr83	Frem2	Fcgrt		Mapkapk3	Kcne3	Icam1		Mid1	Hmgcr	Gpr137c			Igsf9b	Il2rg
Gpr87	Fsd1l	Ffar4		Mboat2	Kcnh3	Icam5		Mmp15	Hmox1	Gpr141			Ikzf1	Il3ra
Gprc5a	Fut4	Fgfr3		Melk	Kcnh6	Ier3		Msln	Hsd11b2	Gpr171			Il10ra	Insrr
Grid2	Fxyd3	Fmnl1		Mfsd6l	Kcnk5	Ifitm2		Mst1r	Hsd17b2	Gpr176			Il18rap	Itga2
Grin1	Fxyd4	Fndc5		Mgarp	Kcnn4	Ifitm3		Mtfr2	Htr1d	Gpr20			Il21r	Itgal
Has3	Fxyd6	Fpr2		Mgat5	Kcnq1	Ifitm5		Muc1	Icam1	Gpr25			Il5ra	Itgb6
Havcr1	Gabbr1	Fras1		Mmp15	Klrg2	Igdcc4		Muc13	Icam5	Gpr35			Insrr	Iyd
Hcn2	Gabre	Frem2		Mpzl2	Lgr4	Igsf11		Myof	Ifitm3	Gpr39			Itga2	Jakmip1
Hepacam2	Gabrg3	Fsd1l		Mpzl3	Lhfpl1	Igsf6		Nuak2	Igsf11	Gpr65			Itgb6	Kcnc1
Hpn	Gabrp	Fut4		Msln	Lman1l	Igsf8		Osmr	Igsf8	Gpr85			Iyd	Kcne3
Hsd11b2	Galnt14	Fxyd3		Mtfr2	Lpar2	Ikbip		Otop1	Il10ra	Gpsm2			Jakmip1	Kcnk5
Htr1d	Galnt3	Fxyd4		Muc1	Lpar6	Il10ra		P2rx2	Il13ra1	Gsg1			Kcne3	Kit
Icam1	Gcnt2	Fxyd6		Myof	Lpcat4	Il12rb1		Panx1	Il18rap	Gucy2c			Kcnj15	Lag3
Ier3	Gcnt3	Gabre		Nkpd1	Lrrc26	Il13ra1		Paqr4	Il21r	Hbegf			Kcnk5	Lair1
Ifitm3	Gdap1l1	Gabrg3		Nup210l	Lrrc52	Il18rap		Pcdh8	Il2rg	Hcn2			Kcnq1	Lpcat1
Igdcc4	Gde1	Gabrp		Otop1	Lrrc8e	Il21r		Pigr	Il3ra	Heph			Kcns3	Lrfn4
Igfals	Gdpd1	Galnt14		Panx1	Ltk	Il22ra1		Pkhd1	Impg2	Herc6			Krtcap3	Lrp8
Igsf11	Gfra1	Galnt3		Paqr6	Ly6d	Il27ra		Pkmyt1	Insrr	Hhat			Lag3	Lst1
Igsf9	Ggt6	Gcnt2		Paqr8	Ly6e	Il2rb		Plaur	Itga2	Hmgcr			Lair1	Ly6d
Ikzf1	Gjb3	Gcnt3		Pcdh8	Ly6k	Il2rg		Pmepa1	Itgal	Hmox1			Lemd1	Ly6k
Il10rb	Gjb4	Gde1		Pex11a	Ly75	Il3ra		Por	Itgb6	Hsd11b2			Lpcat4	Mall
Il17rb	Gjb6	Gdpd2		Pigr	Mal2	Impg2		Ptpru	Iyd	Hsd17b2			Lrfn4	Mcoln3
Ildr1	Gne	Gfra1		Pkmyt1	Mall	Insrr		Pvr	Jakmip1	Hsd17b7			Lrp8	Melk
Inpp5j	Gp2	Ggt6		Plaur	Map3k1	Itga2		Qsox1	Kcna4	Htr1d			Lrrc8e	Mgam
Insig2	Gpa33	Gjb3		Pmepa1	Mapkapk3	Itgal		Reep6	Kcne3	Icam1			Lrtm2	Mgst2
Insrr	Gpc4	Gjb4		Por	Mboat2	Itgb6		Ret	Kcnh3	Icam5			Lst1	Mmp14
Itga2	Gpr137b	Gjb6		Psca	Melk	Itpr3		Rhbdf2	Kcnj15	Ifitm3			Ly6d	Msln
Itgb4	Gpr155	Gne		Ptgdr	Mfap3l	Itprip		Rhbdl2	Kcnk5	Ifitm5			Ly6e	Mst1r
Itgb6	Gpr35	Gp2		Qsox1	Mfsd6l	Jakmip1		Rnf122	Kcnq1	Igdcc4			Ly75	Mtfr2
Itgb8	Gpr55	Gpa33		Reep6	Mgarp	Kcnd1		Rnf150	Kcns3	Igsf6			Mall	Muc1
Itpripl1	Gpr65	Gpc4		Rgs9bp	Mgat5	Kcne3		Rnf180	Lag3	Igsf8			Map3k1	Muc13
Jakmip1	Gpr83	Gpr137b		Rhbdl2	Mid1	Kcnk5		Rnf186	Lair1	Il10ra			Mcoln3	Muc4
Kcne3	Gpr87	Gpr141		Rhbdl3	Mmp15	Kel		Rnf213	Laptm5	Il18rap			Melk	Myof
Kcnh3	Gprc5a	Gpr176		Rhbg	Mpzl2	Klrd1		Rnf223	Ldlr	Il21r			Mgam	Nfasc
Kcnj15	Grid2	Gpr183		Rnf122	Mpzl3	Klrk1		Rtp4	Lpgat1	Il2rg			Mgst2	Nrm
Kcnk5	Grin1	Gpr35		Rnf150	Msln	Lag3		Scara3	Lrfn4	Il3ra			Milr1	Nuak2
Kcnk7	Gsg1l	Gpr55		Rnf183	Mst1r	Lair1		Scnn1a	Lrmp	Insrr			Mmp14	Nup210l
Kcnn4	Gucy2c	Gpr65		Rnf186	Muc1	Laptm4b		Sh3tc1	Lrp4	Itga2			Mmp15	Osmr
Kcnq1	Has3	Gpr68		Rnf213	Myof	Laptm5		Shisa5	Lrp8	Itgal			Msln	P2ry1
Klrg2	Havcr1	Gpr83		Rnf223	Nkpd1	Lilra5		Slc10a2	Lrrc66	Itgam			Mst1r	P2ry6
L1cam	Hcn2	Gpr87		Rtp4	Notch2	Litaf		Slc16a12	Lrtm2	Itgb6			Mtfr2	Parvg
Lgr4	Hepacam2	Gprc5a		S100a10	Nup210l	Lpcat4		Slc16a14	Lst1	Iyd			Mthfd1l	Pcdhb4
Lhfpl1	Heph	Grid2		Scara3	Otop1	Lpgat1		Slc16a3	Ly6d	Jakmip1			Muc1	Pcdhb5
Lman1l	Hmox1	Grin1		Scnn1a	Panx1	Lrrc66		Slc1a1	Ly6k	Kcnc3			Muc13	Pcdhb7
Lpar2	Hpn	Gsg1l		Sdc4	Paqr4	Lst1		Slc23a3	Mag	Kcne3			Muc4	Pdcd1
Lpar6	Hsd11b2	Gucy2c		Sh3tc1	Paqr6	Ly6d		Slc25a45	Mall	Kcnh3			Myof	Pdcd1lg2
Lpcat4	Hsd17b2	Has3		Shisa5	Paqr8	Ly6k		Slc25a48	Map3k1	Kcnj15			Nfasc	Pear1
Lpgat1	Htr1d	Hbegf		Slc10a2	Parm1	Mall		Slc26a1	Melk	Kcnk13			Nrm	Pkmyt1
Lrrc26	Icam1	Hcn2		Slc10a5	Pcdh8	Mapkapk3		Slc27a3	Mgam	Kcnk5			Nuak2	Plaur
Lrrc8e	Icam5	Hepacam2		Slc12a2	Pex11a	March1		Slc28a3	Mgarp	Kcnq1			Osmr	Plxnd1
Ltk	Ier3	Heph		Slc16a11	Pgap1	Mboat2		Slc34a2	Mgst2	Lag3			P2ry1	Pmepa1
Ly6d	Ifitm2	Hhat		Slc16a12	Pigr	Mctp2		Slc35g1	Mmp14	Lair1			P2ry6	Praf2
Ly6e	Ifitm3	Hilpda		Slc16a14	Pkhd1	Mdfic		Slc37a1	Mogat2	Laptm5			Paqr4	Ptger4
Ly6k	Igdcc4	Hmox1		Slc16a3	Pkmyt1	Melk		Slc39a4	Mpeg1	Lat			Parvg	Pth1r
Lynx1	Igfals	Hpn		Slc23a3	Plaur	Memo1		Slc39a8	Msln	Ldlr			Pcdhb1	Ptk7
Mal2	Igsf11	Hsd11b2		Slc25a48	Plxnb2	Mgam		Slc40a1	Mst1r	Lilrb3			Pdcd1	Ptpru
Mall	Igsf3	Hsd17b2		Slc26a1	Pmepa1	Mgarp		Slc41a3	Mtfr2	Lilrb4			Pkmyt1	Ptprz1
Man2a2	Igsf9	Htr1d		Slc26a4	Por	Mgat5		Slc43a2	Mthfd1l	Litaf			Plaur	Pvr
Map3k1	Ikzf1	Icam1		Slc27a2	Psca	Mgst2		Slc44a4	Muc1	Lmtk3			Plxna2	Qsox1
Mapkapk3	Il10rb	Icam5		Slc2a12	Ptgdr	Milr1		Slc46a2	Muc13	Lpcat1			Pmepa1	Rad51b
Mast1	Il17rb	Ier3		Slc34a2	Ptpru	Mmp14		Slc4a7	Muc4	Lrfn4			Prom1	Rasgef1b
Mboat2	Il21r	Ifitm2		Slc35g1	Pvr	Mpzl2		Slc6a8	Myof	Lrmp			Ptger3	Reep2
Mdfic	Il22ra1	Ifitm3		Slc39a12	Qsox1	Ms4a7		Slc9a5	Myrf	Lrp12			Ptger4	Relt
Megf9	Inpp5j	Igdcc4		Slc39a4	Rdh16	Msln		Smim6	Nfasc	Lrp8			Ptk7	Rnf122
Melk	Insrr	Igfals		Slc40a1	Reep4	Mst1r		Spns2	Nipal1	Lrrc25			Ptprn2	Rnf183
Memo1	Itga2	Igsf11		Slc43a2	Reep6	Mtfr2		Sptlc3	Nkg7	Lrrc3b			Ptpru	Rnf213
Mfap3l	Itgae	Igsf3		Slc46a2	Rgs9bp	Muc1		Steap4	Nrm	Lrrc55			Qsox1	Rnf223
Mfsd6l	Itgb4	Igsf9		Slc5a8	Rhbdf1	Myof		Stom	Nuak2	Lrrc66			Rasgef1b	Robo4
Mgarp	Itgb6	Igsf9b		Slc9a5	Rhbdl2	Nckap1l		Styk1	Olr1	Lst1			Rhbdf2	Rprm
Mgat5	Itgb8	Ikzf1		Smco4	Rhbdl3	Nipal1		Susd4	Orai2	Ly6d			Rnf122	Rtp4
Mgst1	Itpr3	Il10ra		Smim6	Rhbg	Nkg7		Syngr1	Osmr	Ly75			Rnf150	Samd5
Mgst3	Itpripl1	Il10rb		Smo	Rnf122	Nlgn2		Syt16	Otop1	Ly9			Rnf152	Scimp
Mid1	Itpripl2	Il17rb		Spint1	Rnf130	Nrm		Syt8	P2ry1	Mag			Rnf183	Scn8a
Mmp15	Iyd	Il21r		Spns2	Rnf150	Nup210l		Syt9	Panx1	Mall			Rnf213	Sdc1
Mmp16	Jakmip1	Il22ra1		Sptlc3	Rnf183	Nup93		Tacstd2	Paqr4	March4			Rnf223	Sdsl
Mpzl2	Kcne3	Il3ra		St8sia5	Rnf186	Olr1		Tap1	Parvg	Melk			Rtp4	Sema6b
Mpzl3	Kcnh3	Inpp5j		Stard3	Rnf213	Osmr		Tap2	Pcdh8	Mfsd2b			Scara3	Sema6d
Mrc1	Kcnj10	Insrr		Steap4	Rnf223	P2ry6		Tcirg1	Pcdhb5	Mgam			Scimp	Sema7a
Msln	Kcnj15	Itga2		Styk1	Rtp4	Panx1		Tfrc	Pdcd1	Mgarp			Scn8a	Sez6l2
Mst1r	Kcnk5	Itgae		Syt16	S100a10	Parm1		Tlr1	Pear1	Mgst2			Sdc1	Sgpp2
mt-Atp6	Kcnk7	Itgal		Syt8	Scara3	Parvg		Tlr2	Piezo1	Milr1			Sema6b	Shisa4
mt-Co1	Kcnn4	Itgam		Tacstd2	Scnn1a	Pcdhb12		Tmc4	Pigr	Mmp14			Sgpp2	Slamf9
mt-Co3	Kcnq1	Itgb4		Tcirg1	Sdc1	Pcdhb16		Tmc5	Pkmyt1	Mogat2			Shisa4	Slc10a2
mt-Nd3	Kcns3	Itgb6		Tfrc	Sdc4	Pcdhb5		Tmcc3	Plaur	Mpeg1			Slamf9	Slc16a3
Muc1	Kit	Itgb8		Tlr1	Sh3tc1	Pcdhb7		Tmem121	Plscr3	Ms4a7			Slc10a2	Slc1a1
Myof	Klrg2	Itpr3		Tlr2	Shisa5	Pcdhb9		Tmem132a	Plxna2	Msln			Slc12a7	Slc23a3
Nbea	L1cam	Itpripl1		Tmc5	Sik1	Pdcd1lg2		Tmem173	Pmepa1	Msr1			Slc16a11	Slc25a45
Nckipsd	Lag3	Iyd		Tmco4	Slc10a2	Pear1		Tmem213	Ptger3	Mst1r			Slc16a14	Slc26a10
Ncmap	Ldlr	Jag1		Tmem117	Slc10a5	Phldb2		Tmem40	Ptger4	Mtfr2			Slc16a3	Slc27a3
Notch2	Ldlrad4	Jakmip1		Tmem132a	Slc12a2	Piezo1		Tmem45b	Ptprc	Mthfd1l			Slc1a1	Slc29a4
Notch3	Lgr4	Kalrn		Tmem139	Slc14a1	Pigr		Tmem63a	Ptpru	Muc1			Slc23a3	Slc2a2
Nphs2	Lhfpl1	Kcnc2		Tmem163	Slc16a11	Pkmyt1		Tmem71	Pvr	Muc13			Slc25a45	Slc2a6
Nrxn1	Lman1l	Kcne3		Tmem173	Slc16a12	Pla2g2f		Tmem98	Qsox1	Muc4			Slc25a48	Slc34a2
Nup210l	Lpar2	Kcnh3		Tmem40	Slc16a3	Plaur		Tmie	Rad51b	Myof			Slc26a1	Slc35d1
Otop1	Lpar6	Kcnj10		Tmem45b	Slc22a23	Plscr3		Tmprss2	Rasgef1b	Myrf			Slc26a2	Slc35f2
P2rx2	Lpcat4	Kcnj15		Tmem52	Slc23a3	Plxnd1		Tmprss4	Reep6	Nckap1l			Slc27a3	Slc39a4
P2rx6	Lpgat1	Kcnk5		Tmem74b	Slc25a45	Pmepa1		Tmprss6	Relt	Ncmap			Slc2a2	Slc39a8
P2ry6	Lrfn3	Kcnk7		Tmem98	Slc25a48	Prokr2		Tnfrsf11a	Rhbdl2	Ndufa4l2			Slc2a6	Slc40a1
Panx1	Lrp4	Kcnn4		Tmie	Slc26a4	Ptgdr		Tnfrsf12a	Rnf122	Nfasc			Slc34a2	Slc6a8
Paqr4	Lrp8	Kcnq1		Tmprss4	Slc27a2	Ptger4		Tnfrsf1b	Rnf150	Nlgn2			Slc35d1	Slc7a3
Paqr6	Lrrc26	Kcns1		Tmprss6	Slc27a3	Ptk7		Tnfrsf4	Rnf186	Nphp4			Slc35f2	Slc7a7
Paqr8	Lrrc52	Kcns3		Tnfrsf12a	Slc2a12	Ptprc		Tnfsf10	Rnf213	Nrm			Slc39a4	Slc9a4
Parm1	Lrrc8e	Kit		Tnfsf10	Slc2a2	Ptprh		Tnfsf8	Rnf223	Nuak2			Slc39a8	Slc9a5
Pdzk1ip1	Lrtm2	Klrg2		Trim59	Slc34a2	Pvr		Trem1	Rprm	Nup210l			Slc40a1	Smim6
Pex11a	Ltk	L1cam		Trpv3	Slc35g1	Rad51b		Trim59	Rtp4	Osmr			Slc44a4	Smpd3
Pgap1	Ly6d	Lag3		Tspan3	Slc37a1	Rcn3		Trpm6	S100a10	P2ry1			Slc4a7	Soat2
Pigr	Ly6e	Lair1		Tspan33	Slc39a12	Rdh10		Tspan33	Scamp5	P2ry14			Slc6a8	Spns3
Pkd2l1	Ly6k	Ldlr		Tspan8	Slc39a4	Reep4		Tspan8	Scara3	P2ry6			Slc7a7	Sqle
Pkhd1	Lynx1	Ldlrad4		Ttyh3	Slc40a1	Relt		Ttyh3	Scimp	Panx1			Slc9a4	St3gal4
Pkmyt1	Mal2	Lemd1		Tyro3	Slc43a2	Rhbdl2		Txndc16	Scn8a	Paqr4			Slc9a5	St6galnac6
Plaur	Mall	Lgr4		Uba7	Slc46a2	Rmdn2		Uba7	Sdc1	Paqr5			Smim6	Steap4
Pmepa1	Man2a2	Litaf		Ugt1a1	Slc4a4	Rnf122		Ugt1a1	Sdsl	Parvg			Smpd3	Stom
Por	Map3k1	Lman1l		Upk1b	Slc4a7	Rnf183		Upk1b	Sema6b	Pcdh8			Soat2	Stx1a
Ppm1l	Mapkapk3	Lpar2		Upk2	Slc5a8	Rnf186		Upk2	Sgpp2	Pcdhb12			Spns3	Styk1
Ppp1r3f	March4	Lpar6		Uts2r	Slc5a9	Rtp4		Vsig1	Slamf8	Pcdhb5			Sqle	Syt16
Psca	Mboat2	Lpcat4		Vangl2	Slc9a5	S100a10		Vtcn1	Slamf9	Pdcd1			St3gal4	Syt5
Ptpru	Mdfic	Lpgat1		Vsig1	Smco4	S1pr2		Wdhd1	Slc10a2	Pdcd1lg2			St6galnac6	Syt8
Ptprz1	Megf11	Lrfn3		Vsig10	Smim6	Scara3		Xkr4	Slc16a1	Pear1			Steap4	Tacstd2
Qsox1	Megf9	Lrig1		Vtcn1	Smo	Scimp		Zdhhc13	Slc16a3	Piezo1			Stom	Tap1
Rdh16	Melk	Lrp8		Wnt4	Spint1	Sdc1			Slc16a5	Pigr			Stx1a	Tcirg1
Reep4	Memo1	Lrrc26		Xkr9	Spns2	Selplg			Slc1a1	Pilra			Styk1	Tfrc
Ret	Mfsd6l	Lrrc66			Sppl2a	Sema6b			Slc23a3	Pkmyt1			Susd1	Tlr1
Rgs9bp	Mgarp	Lrrc8e			Sptlc3	Shisa5			Slc25a45	Plaur			Syt16	Tlr2
Rhbdf2	Mgat5	Lrtm2			Sptssb	Slamf8			Slc25a48	Pld4			Syt8	Tm4sf4
Rhbdl2	Mgst1	Lst1			St6galnac4	Slamf9			Slc26a1	Plscr3			Tacstd2	Tmc5
Rhbdl3	Mgst2	Ltk			St6galnac6	Slc10a2			Slc27a3	Plxna2			Tap1	Tmem132a
Rhbg	Mgst3	Ly6d			Stard3	Slc14a1			Slc2a2	Plxnd1			Tap2	Tmem140
Rnf122	Mid1	Ly6k			Steap4	Slc16a1			Slc2a6	Pmepa1			Tcirg1	Tmem150b
Rnf130	Mmp14	Lynx1			Styk1	Slc16a12			Slc34a2	Praf2			Tfrc	Tmem171
Rnf150	Mmp15	Mal2			Syt16	Slc16a3			Slc35d1	Prrt3			Tlr1	Tmem202
Rnf152	Mpzl2	Mall			Syt8	Slc17a4			Slc35f2	Ptch2			Tlr2	Tmem236
Rnf183	Mrc1	Man2a2			Tacstd2	Slc23a3			Slc35g1	Ptger3			Tm4sf4	Tmem40
Rnf186	Msln	Map3k1			Tcirg1	Slc25a45			Slc37a1	Ptger4			Tmc5	Tmem45b
Rnf213	Mst1r	Mapkapk3			Tfrc	Slc25a48			Slc39a4	Ptk7			Tmem132a	Tmem71
Rnf223	Muc1	March4			Tlr1	Slc27a3			Slc39a5	Ptprc			Tmem140	Tmem82
Rtp4	Muc13	Mboat2			Tlr2	Slc2a12			Slc39a8	Ptpre			Tmem150b	Tmem86a
S100a10	Muc4	Melk			Tlr3	Slc34a2			Slc40a1	Pvr			Tmem171	Tmprss11e
Scamp5	Myof	Memo1			Tmc4	Slc35d1			Slc6a6	Qsox1			Tmem213	Tmprss4
Scara3	Myrf	Mfsd6l			Tmc5	Slc35g1			Slc6a8	Rad51b			Tmem236	Tmprss6
Scn8a	Nbea	Mgam			Tmc7	Slc40a1			Slc7a7	Rasgef1b			Tmem40	Tnfrsf10b
Scnn1a	Nckipsd	Mgarp			Tmco4	Slc43a2			Slc9a3	Rcn3			Tmem45b	Tnfrsf12a
Scnn1b	Ncmap	Mgat5			Tmem117	Slc4a4			Slc9a4	Rdh10			Tmem63a	Tnfrsf1b
Scnn1g	Notch2	Mgst1			Tmem132a	Slc6a13			Slc9a5	Relt			Tmem71	Tnfrsf4
Sdc1	Notch3	Mgst2			Tmem139	Slc6a6			Smim6	Rhbdf2			Tmem82	Tnfrsf9
Sdc4	Npbwr1	Mgst3			Tmem163	Slc7a7			Smpd3	Rhbdl2			Tmem86a	Tnfsf10
Serinc2	Nphs2	Mmp14			Tmem173	Slc9a4			Soat2	Rnf122			Tmie	Trem1
Serpina10	Nrm	Mpeg1			Tmem200b	Smim3			Sorcs2	Rnf213			Tmigd1	Trim59
Sh3tc1	Nup210l	Mpzl1			Tmem213	Smim6			Spns3	Rprm			Tmprss4	Trpc6
Shisa2	Orai2	Mpzl2			Tmem40	Smo			Sptssb	Rtp4			Tmprss6	Trpm6
Shisa5	Osmr	Mpzl3			Tmem45b	Soat1			Sstr2	S100a10			Tnfrsf10b	Ttyh1
Slc10a2	Otop1	Msln			Tmem52	Soat2			St3gal4	Sbk1			Tnfrsf12a	Ttyh2
Slc10a5	P2rx2	Mst1r			Tmem63a	Spn			St6galnac4	Scamp5			Tnfrsf1b	Ttyh3
Slc12a2	P2rx6	Mtfr2			Tmem82	Spns2			St6galnac6	Scimp			Tnfrsf4	Tuba8
Slc12a7	P2ry1	Muc1			Tmem98	Sptssb			St8sia5	Scn8a			Tnfrsf9	Uba7
Slc16a11	P2ry6	Muc13			Tmie	Sstr2			Stab2	Sdc1			Tnfsf10	Ugt1a1
Slc16a12	Pam	Muc4			Tmprss4	St3gal4			Steap2	Sdsl			Tnfsf18	Unc5b
Slc16a13	Panx1	Mvd			Tmprss6	St6galnac4			Steap4	Selplg			Tnfsf8	Vsig1
Slc16a14	Paqr4	Myof			Tnfrsf12a	Steap2			Stom	Sema6b			Treml2	Vtcn1
Slc16a3	Paqr6	Myrf			Tnfrsf21	Steap4			Stx1a	Sema7a			Trim59	Wnt4
Slc22a15	Paqr8	Ncmap			Tnfsf10	Stra6			Styk1	Sez6l2			Trpm6	Xkr4
Slc22a18	Parm1	Nfasc			Trim59	Stx1a			Syt16	Sfxn4			Tspan8	Zdhhc13
Slc23a3	Parvg	Nipal1			Trpv3	Styk1			Syt8	Sgpp2			Ttyh2
Slc25a48	Pcdh8	Nkg7			Tspan3	Susd3			Syt9	Sirpa			Ttyh3
Slc26a4	Pdcd1	Notch2			Tspan33	Syt15			Tacstd2	Slamf6			Tuba8
Slc27a2	Pear1	Notch3			Tspan8	Syt16			Tap1	Slamf8			Txndc16
Slc2a12	Pex11a	Nrm			Ttyh3	Syt8			Tap2	Slamf9			Uba7
Slc30a4	Pgap1	Nup210l			Tyro3	Tacstd2			Tapbp	Slc10a2			Ugt1a1
Slc31a1	Phldb2	Orai2			Uba7	Tapbp			Tcirg1	Slc11a1			Vcam1
Slc34a2	Pigr	Osmr			Ugt1a1	Tbxa2r			Tenm4	Slc12a7			Vsig1
Slc35g1	Pkd2l1	Otop1			Upk1b	Tcirg1			Tfrc	Slc12a8			Vtcn1
Slc39a4	Pkhd1	P2ry1			Upk2	Tctn2			Tgfbr2	Slc15a3			Wdhd1
Slc39a8	Pkmyt1	P2ry6			Vangl2	Tfrc			Tigit	Slc16a1			Xkr4
Slc40a1	Pla2g2f	Panx1			Vsig1	Tgfbr2			Tlr1	Slc16a14			Zan
Slc41a3	Plaur	Paqr4			Vsig10	Tigit			Tlr2	Slc16a3			Zdhhc13
Slc43a2	Plxna1	Paqr6			Vtcn1	Tlr1			Tlr6	Slc1a1
Slc44a3	Plxnb1	Paqr8			Wdhd1	Tlr2			Tm4sf4	Slc20a1
Slc45a3	Plxnb2	Parm1			Wnt4	Tlr6			Tmc5	Slc23a3
Slc4a4	Pmepa1	Parvg				Tm4sf20			Tmem106a	Slc25a45
Slc4a7	Por	Pcdhb12				Tmc5			Tmem132a	Slc26a1
Slc4a9	Ppm1l	Pcdhb5				Tmem106a			Tmem140	Slc26a10
Slc5a5	Ppp1r3f	Pcdhb7				Tmem119			Tmem150b	Slc29a2
Slc5a8	Prrg4	Pcdhb9				Tmem140			Tmem171	Slc2a1
Slc5a9	Psca	Pdcd1				Tmem144			Tmem173	Slc2a2
Slc6a6	Ptchd1	Pear1				Tmem150b			Tmem202	Slc2a6
Slc6a8	Ptger4	Pgap1				Tmem158			Tmem213	Slc35d1
Smco4	Ptprt	Phldb2				Tmem171			Tmem236	Slc35f2
Smim3	Ptpru	Piezo1				Tmem173			Tmem40	Slc39a2
Smim6	Ptprz1	Pigr				Tmem202			Tmem45b	Slc39a4
Smo	Qsox1	Pkd2l1				Tmem221			Tmem54	Slc39a5
Smpd3	Rasgef1b	Pkhd1				Tmem236			Tmem63a	Slc40a1
Soat1	Rdh16	Pkmyt1				Tmem40			Tmem71	Slc6a6
Spns2	Reep4	Pla2g2f				Tmem82			Tmem82	Slc7a7
Sppl2a	Reep6	Plaur				Tmem86a			Tmem86a	Slc9a4
Sptlc3	Ret	Plxna1				Tmem95			Tmie	Slc9a5
Sptssb	Rgs9bp	Plxnb1				Tmprss4			Tmprss4	Smim3
Sstr2	Rhbdf2	Plxnb2				Tmprss6			Tmprss6	Smim6
St3gal3	Rhbdl2	Pmepa1				Tnfrsf10b			Tnfrsf10b	Smpd3
St6galnac4	Rhbdl3	Por				Tnfrsf12a			Tnfrsf12a	Soat1
St8sia3	Rhbg	Ppp1r3f				Tnfrsf13b			Tnfrsf1b	Soat2
Steap4	Rnf130	Prrg4				Tnfrsf1b			Tnfrsf4	Sorcs2
Stim2	Rnf150	Psca				Tnfrsf25			Tnfrsf9	Spag4
Stx1a	Rnf152	Ptgdr				Tnfrsf9			Tnfsf10	Spns3
Styk1	Rnf183	Ptger4				Tnfsf10			Tnfsf8	Sptssb
Susd4	Rnf186	Ptk7				Tnfsf13b			Tpcn2	Sstr2
Syngr1	Rnf213	Ptprc				Tnfsf18			Trem1	St3gal4
Syp	Rnf223	Ptprr				Tnfsf8			Treml1	St6galnac6
Syt16	Rtp4	Ptprs				Tpcn2			Treml2	Steap2
Syt5	S100a10	Ptpru				Traf3ip3			Trim59	Stom
Syt8	Scamp5	Ptprz1				Trem1			Trpm2	Stx1a
Syt9	Scara3	Qsox1				Treml1			Trpm6	Styk1
Tacstd2	Scimp	Rasgef1b				Treml2			Tspan6	Susd1
Tcirg1	Scn8a	Rdh16				Trim59			Tspan8	Syngr1
Tlr1	Scnn1a	Reep4				Trpc6			Ttyh2	Syt16
Tlr2	Scnn1b	Relt				Trpm2			Ttyh3	Syt6
Tlr3	Scnn1g	Ret				Trpm6			Txndc16	Syt8
Tm4sf4	Sdc1	Rgs9bp				Tspan32			Uba7	Tap1
Tmc5	Sdc4	Rhbdf2				Tspan4			Ugt1a1	Tbxas1
Tmc7	Sema4b	Rhbdl2				Tspan6			Ugt1a8	Tcirg1
Tmcc3	Sema6b	Rhbdl3				Tspan9			Ulbp1	Tenm4
Tmco4	Serinc2	Rhbg				Ttyh2			Ulk4	Tfr2
Tmem117	Serpina10	Rnf122				Ttyh3			Vcam1	Tfrc
Tmem132a	Sgpp2	Rnf150				Tyrobp			Vsig1	Tigit
Tmem139	Sh3tc1	Rnf152				Uba7			Vtcn1	Tlr1
Tmem163	Shisa2	Rnf183				Ugt1a1			Wdhd1	Tlr2
Tmem200b	Shisa5	Rnf186				Ugt1a8			Xkr4	Tlr6
Tmem213	Sik1	Rnf223				Ulk4			Xkr5	Tm4sf4
Tmem30b	Slc10a2	Rtp4				Unc93b1			Zan	Tm6sf1
Tmem37	Slc10a5	S100a10				Vangl2				Tmc5
Tmem40	Slc12a2	S1pr2				Vasn				Tmem106a
Tmem52	Slc12a7	Sbk1				Vsig8				Tmem132a
Tmem54	Slc14a1	Scamp5				Vstm4				Tmem140
Tmem64	Slc16a11	Scara3				Wdhd1				Tmem150b
Tmem74b	Slc16a12	Scimp				Wnt4				Tmem156
Tmie	Slc16a13	Scn8a				Xkr4				Tmem171
Tmprss4	Slc16a14	Scnn1a				Zdhhc15				Tmem198
Tmprss6	Slc16a3	Scnn1b								Tmem236
Tnfrsf11a	Slc17a4	Scnn1g								Tmem253
Tnfrsf12a	Slc22a15	Sdc1								Tmem45b
Tnfrsf1b	Slc22a18	Sdc4								Tmem54
Tnfrsf21	Slc23a3	Sell								Tmem82
Tnfsf10	Slc25a48	Sema6b								Tmem86a
Tnfsf18	Slc26a1	Serinc2								Tmem86b
Trem1	Slc26a4	Serpina10								Tmem88
Trim59	Slc27a2	Sgpp2								Tmprss4
Trpv3	Slc2a12	Sh3tc1								Tmprss6
Tspan3	Slc30a4	Shisa2								Tnfrsf10b
Tspan33	Slc31a1	Shisa5								Tnfrsf12a
Tspan8	Slc34a2	Slamf6								Tnfrsf13b
Tspo	Slc35d1	Slc10a2								Tnfrsf1b
Ttyh3	Slc35g1	Slc10a5								Tnfrsf25
Tyro3	Slc39a4	Slc12a2								Tnfrsf4
Uba7	Slc39a8	Slc12a7								Tnfrsf9
Ugt1a1	Slc40a1	Slc16a1								Tnfsf10
Upk1a	Slc41a3	Slc16a11								Tnfsf18
Upk2	Slc43a2	Slc16a12								Tnfsf8
Vangl2	Slc45a3	Slc16a13								Tpcn2
Vsig1	Slc4a4	Slc16a14								Traf3ip3
Vtcn1	Slc4a7	Slc16a3								Trem1
Wnt4	Slc4a9	Slc17a4								Treml2
Xkr4	Slc5a8	Slc1a2								Trim59
Xkr9	Slc5a9	Slc22a15								Trpm2
	Slc6a14	Slc22a18								Trpm6
	Slc6a6	Slc23a3								Tspan6
	Slc6a8	Slc25a48								Ttyh2
	Slc7a7	Slc26a1								Ttyh3
	Slc9a4	Slc26a4								Tyrobp
	Smco4	Slc26a9								Uba7
	Smim6	Slc27a2								Ugt1a1
	Smo	Slc2a12								Ugt1a8
	Smpd3	Slc2a6								Ulbp1
	Soat1	Slc30a4								Ulk4
	Soat2	Slc34a2								Unc93b1
	Sorcs2	Slc35d1								Vangl2
	Spns2	Slc35g1								Vsig1
	Sppl2a	Slc39a4								Wdhd1
	Sptlc3	Slc39a8								Xkr4
	Sptssb	Slc40a1								Xkr5
	Srd5a1	Slc41a3								Zan
	Sstr2	Slc43a2
	St3gal3	Slc4a4
	St3gal4	Slc4a7
	St6galnac4	Slc4a9
	St6galnac6	Slc5a8
	St8sia3	Slc5a9
	Steap2	Slc6a6
	Steap4	Slc6a8
	Stim2	Slc7a7
	Stom	Slc9a4
	Stx1a	Smco4
	Styk1	Smim3
	Susd4	Smim6
	Syngr1	Smo
	Syt16	Smpd3
	Syt8	Soat1
	Syt9	Soat2
	Tacstd2	Sorcs2
	Tcirg1	Spns2
	Tenm4	Spns3
	Tfrc	Sppl2a
	Thsd4	Sptlc3
	Tlr1	Sptssb
	Tlr2	Srd5a1
	Tlr3	Sstr2
	Tm4sf4	St3gal4
	Tmc4	St6galnac4
	Tmc5	St6galnac6
	Tmc7	St8sia3
	Tmcc3	Steap2
	Tmco4	Steap4
	Tmem117	Stim2
	Tmem132a	Stom
	Tmem139	Stra6
	Tmem150c	Stx1a
	Tmem163	Styk1
	Tmem171	Susd4
	Tmem173	Syngr1
	Tmem200b	Syt16
	Tmem213	Syt8
	Tmem236	Syt9
	Tmem30b	Tacstd2
	Tmem37	Tbc1d2b
	Tmem40	Tcirg1
	Tmem52	Tenm4
	Tmem54	Tfrc
	Tmem63a	Thsd4
	Tmem74b	Tlr1
	Tmem82	Tlr2
	Tmem98	Tlr6
	Tmie	Tm4sf4
	Tmprss4	Tmc5
	Tmprss6	Tmc7
	Tnfrsf11a	Tmcc3
	Tnfrsf12a	Tmco4
	Tnfrsf1b	Tmem117
	Tnfrsf21	Tmem132a
	Tnfrsf9	Tmem139
	Tnfsf10	Tmem140
	Tnfsf18	Tmem150b
	Trem1	Tmem150c
	Treml2	Tmem163
	Trim59	Tmem171
	Trpv3	Tmem200b
	Trpv6	Tmem213
	Tspan17	Tmem236
	Tspan3	Tmem37
	Tspan33	Tmem40
	Tspan6	Tmem52
	Tspan7	Tmem54
	Tspan8	Tmem63a
	Tspan9	Tmem74b
	Tspo	Tmem82
	Ttyh2	Tmie
	Ttyh3	Tmprss4
	Tyro3	Tmprss6
	Uba7	Tnfrsf10b
	Ugt1a1	Tnfrsf11a
	Upk1a	Tnfrsf12a
	Upk1b	Tnfrsf1b
	Upk2	Tnfrsf21
	Vangl1	Tnfrsf9
	Vangl2	Tnfsf10
	Vcam1	Tnfsf18
	Vsig1	Tnfsf8
	Vtcn1	Traf3ip3
	Wnt4	Trem1
	Xkr4	Treml2
	Xkr9	Trim59
	Zdhhc13	Trpm6
		Trpv3
		Trpv6
		Tspan3
		Tspan32
		Tspan33
		Tspan6
		Tspan7
		Tspan8
		Tspo
		Ttyh2
		Ttyh3
		Tyro3
		Uba7
		Ugt1a1
		Unc93b1
		Upk1a
		Upk2
		Vangl1
		Vangl2
		Vcam1
		Vsig1
		Vtcn1
		Wnt4
		Xkr4
		Xkr9
		Zdhhc13

## Sheet: Down MP
AP - downregulated				DP - downregulated				LP - downregulated				VP - downregulated
mPIN	MT	AT		mPIN	MT	AT		mPIN	MT	AT		mPIN	MT	AT
A3galt2	A3galt2	A3galt2		Abca5	A3galt2	A3galt2		Abca5	A3galt2	A3galt2		Acvr1c	A3galt2	A3galt2
Abca5	A4galt	A4galt		Abca6	Abca5	Aatk		Abca6	Abca5	A4galt		Adam11	A4galt	Abca5
Abca6	Abca5	Abca5		Abca9	Abca6	Abca5		Abca9	Abcb6	Abca5		Adcy1	Abca5	Abca6
Abcb6	Abca6	Abhd12		Abcc12	Abca9	Abcc12		Abcb6	Abcc12	Abhd12		Adcy5	Abca6	Abcg4
Abhd14a	Abhd14a	Ace		Adam11	Abcc12	Abcc3		Abcc9	Abhd12	Abhd2		Alk	Abcb6	Abhd12
Ace	Ace	Acsl3		Adcy5	Abhd12	Abcg4		Abhd14a	Abhd2	Abhd3		Aqp5	Abhd1	Abo
Acsl3	Acsl3	Acvr1c		Apcdd1	Abhd14a	Abhd12		Abhd3	Abhd3	Abo		Art3	Abhd3	Acvr1c
Acvr1c	Acvr1c	Acvr2b		Art3	Acsl4	Abhd3		Abo	Abo	Ace		Asic4	Abo	Adam33
Acvr2b	Acvr2b	Adck5		Asic4	Adam11	Abo		Acsl4	Acsl1	Acsl1		Atp2b3	Acvr1c	Adcy1
Adam11	Adam11	Adcy5		Atf6	Adcy5	Ace		Acvr1c	Acsl4	Acsl4		Atp2b4	Adam33	Adcy5
Adam33	Adam33	Adipor2		Atp12a	Adra1a	Ache		Adam11	Acvr1c	Acvr1c		Cacna1c	Adcy1	Adcy9
Adcy5	Adcy1	Adra1a		Atp13a4	Amhr2	Acpp		Adam22	Adam11	Adam28		Caln1	Adcy5	Adra1a
Adcyap1r1	Adcy5	Adrb2		Atp2b4	Apcdd1	Acsl1		Adam33	Adam28	Adcy1		Cav1	Adra1a	Adrb3
Adipor2	Adipor2	Aldh6a1		Bves	Art3	Acss1		Adcy1	Adcy1	Adcy5		Cdh19	Adrb3	Ajap1
Apcdd1	Adrb2	Amigo1		Cacna1c	Asic4	Acvr1c		Adcy5	Adcy5	Adcy9		Cdh20	Agpat3	Aldh3a2
Armcx2	Aldh6a1	Apcdd1		Cacna2d1	Atf6	Adam28		Adra1a	Adra1a	Adra1a		Cdh8	Ajap1	Aldh6a1
Art3	Amhr2	Armcx2		Cacnb4	Atp12a	Adam33		Ajap1	Adrb2	Adrb2		Clstn2	Aldh3a2	Alk
Asic4	Apcdd1	Armcx6		Cav1	Atp13a4	Adcy5		Aldh3a2	Ajap1	Adrb3		Derl3	Aldh6a1	Aqp5
Atf6	Armcx2	Art3		Ccdc141	Atp2b3	Adcy9		Aldh6a1	Aldh3a2	Agpat3		Dmpk	Alk	Asic4
Atp12a	Armcx6	Asic4		Cd28	Atp2b4	Adcyap1r1		Alk	Aldh6a1	Aldh3a2		Dner	Aqp5	Atp12a
Atp1a2	Art3	Atf6		Cd52	Bmpr1b	Adig		Apcdd1	Amigo1	Aldh6a1		Dpp6	Asic4	Bmpr1b
Atp2b4	Asic2	Atp12a		Cdh19	Bves	Adipor2		Aqp8	Amigo2	Amigo1		Faim2	Atp13a4	Bnipl
Atp8a1	Atf6	Atp2b3		Cdh8	Cacna1c	Adra1a		Art3	Apcdd1	Aqp5		Fam171b	Atp1a2	Cacna1i
B3gnt2	Atp12a	Bmpr1b		Chrm2	Cacna2d1	Adrb2		Asic2	Aqp5	Aqp8		Fam189a1	Atp2b3	Cacnb4
Brsk1	Atp2b3	Cachd1		Chrna7	Cacnb4	Adrb3		Asic4	Art4	Art4		Flrt1	Bmpr1b	Caln1
Bves	Atp2b4	Cacna1c		Cldn1	Caln1	Ajap1		Atp12a	Asic4	Asic4		Flrt2	Cacna1i	Camk1d
Cachd1	B3gnt2	Ccdc167		Clstn2	Camk2g	Akap6		Atp13a4	Atp12a	Atp12a		G6pc2	Cacnb4	Catsperd
Cacna1c	Bmpr1b	Cd163		Cnnm1	Camk4	Aldh6a1		Atp2b3	Atp13a4	Atp13a4		Galnt9	Caln1	Cd163
Camk4	Brsk1	Cd320		Ctns	Cav1	Amigo1		Atp2b4	Atp2b3	Atp2b3		Ggt1	Cav1	Cd164l2
Cav1	Bves	Cd52		Cux2	Ccdc136	Art3		Bmpr1b	Bmpr1b	Atp2c2		Gpr62	Cckar	Cdh20
Ccdc136	Cachd1	Cdh19		Cyb5r2	Cd28	Asic4		Bsnd	Bnipl	Atp6v0e2		Greb1	Cd164l2	Cdh8
Cd163	Cacna1c	Cds2		Cyp1a1	Cd52	Atf6		Bves	Bsnd	Bmpr1b		Gria1	Cd28	Chrm1
Cd28	Cacna2d1	Chrm1		Derl3	Cdh19	Atp12a		Cacna1c	Cacna1i	Bnipl		Hhip	Cdh19	Chrm3
Cd52	Cacnb4	Chrm2		Dmpk	Cdh8	Atp2b2		Cacna1i	Cacnb4	Bsnd		Il13ra2	Cdh20	Chrnb3
Cdh19	Camk4	Cldn8		Dnajb14	Chrm1	Atp4a		Cacna2d1	Caln1	Cacna1i		Itga8	Cdh8	Cntnap2
Chrm2	Cav1	Cnnm1		Dner	Chrm2	Atp6v0e2		Cacnb4	Catsperd	Cacnb4		Jph2	Cers4	Dclk3
Cnnm1	Ccdc136	Cntnap2		Dscam	Chrna7	Bmpr1b		Caln1	Cckar	Caln1		Kcna6	Chpt1	Derl3
Col13a1	Cd163	Ctns		Egf	Chst10	Brsk2		Camk4	Cd164l2	Catsperd		Kcnb1	Chrm3	Dmpk
Csmd1	Cd28	Cux2		Epha6	Chst3	Bsnd		Cav1	Cd320	Cckar		Kcng1	Cldn10	Edar
Cux2	Cd320	Degs2		Fam171b	Clstn2	Cacnb4		Ccdc136	Cdh19	Cd163		Kcng4	Clstn2	Egf
Cyb5r2	Cd52	Dennd3		Fat3	Cnnm1	Cadm2		Cckar	Cdh20	Cd164l2		Kcnh2	Cntnap2	Entpd3
Cyp20a1	Cdh19	Derl3		Fkbp11	Corin	Cd163		Cd163	Cers4	Cd320		Kcnk3	Ctns	Ephb6
Ddr2	Cds2	Dmpk		Flrt1	Crb2	Cd164l2		Cd164l2	Chml	Cdh19		Kcnmb1	Dclk3	Erbb4
Degs2	Cend1	Dnajb14		Flrt2	Ctns	Cd52		Cd320	Chrm1	Cdh20		Kcnq4	Dcst1	Esyt3
Dennd3	Chrm1	Dnajc10		Flrt3	Cux2	Cdh19		Cdh19	Chrm2	Cds1		Kcnq5	Derl3	Fam171b
Derl3	Chrm2	Dner		Fut9	Cyb5r2	Cds1		Cdh8	Chrm3	Cers4		Lgr5	Dmpk	Fam174b
Dmpk	Clstn2	Dpp4		Fzd9	Cyp1a1	Chml		Cend1	Chrna4	Chodl		Lsamp	Dner	Fam187b
Dnajb14	Cnnm1	Dpp6		G6pc2	Cyp20a1	Chrm1		Cers4	Chrna7	Chrm1		Mrgprg	Dpp6	Fam189a1
Dpp4	Col13a1	Egf		Gabra4	Ddr2	Chrm2		Cers6	Chst3	Chrm2		Mrvi1	Edar	Fat3
Dpp6	Crb2	Entpd3		Galnt9	Derl3	Chrm3		Chrm2	Clcnkb	Chrna4		Mylk	Egf	Fbxo31
Egf	Csmd1	Ern1		Gfra3	Dmpk	Chrna3		Chrna4	Cldn6	Chrnb2		Nalcn	Ephb6	Fcamr
Ern1	Ctns	Fam189a1		Ggt1	Dnajb14	Chrna4		Chrna7	Cldn8	Chrnb3		Nmur2	Erbb4	Fmo2
Fam171b	Cux2	Fam210a		Gpr37l1	Dner	Chrnb2		Chst10	Clstn2	Cldn1		Nrg2	Fam171b	Fndc5
Fam189a1	Cyb5r2	Fkbp11		Greb1	Dpp6	Clcnkb		Chst12	Cnnm1	Cldn10		Nrp2	Fam189a1	G6pc2
Fam210a	Cyp1a1	Folr1		Gria1	Dscam	Cldn8		Chst3	Cntnap2	Cldn6		Opn1sw	Fbxo31	Gabra4
Fkbp11	Cyp20a1	Fut8		Grik4	Egf	Clstn1		Cldn1	Ctns	Cldn8		Oprd1	Fkbp11	Galnt18
Flrt2	Ddr2	Fut9		Hhip	Epha3	Clstn2		Clstn2	Cyp1a1	Clstn1		P2rx1	Flrt1	Galnt9
Folr2	Degs2	Galnt9		Ifitm10	Epha6	Cmtm4		Cnnm1	Cyp20a1	Cnnm1		Pappa2	Fmo1	Ggt1
Fut9	Dennd3	Gdpd3		Igf1r	Fam171b	Cnnm1		Cntnap2	Dclk3	Cntfr		Pirt	Fmo5	Gjc3
Galnt9	Derl3	Gfra3		Il13ra2	Fam189a1	Cnr1		Col13a1	Degs2	Cntnap2		Pld5	Fndc5	Gpam
Gfra3	Dmpk	Ggt1		Jph2	Fam210a	Cntnap2		Creb3l1	Derl3	Ctns		Pln	G6pc2	Gpr37l1
Golt1a	Dnajb14	Golt1a		Kcnc4	Fat3	Cpm		Csmd1	Dlk2	Cyb5b		Popdc2	Gabra4	Gpr62
Gpr37l1	Dpp4	Gpr37l1		Kcnf1	Fkbp11	Crb2		Cux2	Dmpk	Cyp1a1		Prom2	Galnt18	Gpr83
Greb1	Dpp6	Greb1		Kcng1	Flrt1	Csmd1		Cyp1a1	Dnajc10	Cyp20a1		Ptprt	Galnt9	Gria1
Grin2d	Dsc1	Grin2d		Kcng2	Flrt2	Ctns		Cyp20a1	Dner	Dclk3		Rcan2	Galr2	Herpud1
Grm7	Egf	Grm7		Kcnmb1	Folr2	Cux2		Ddr2	Dpp6	Degs2		Reck	Gfral	Hhip
Hhip	Epha3	Herpud1		Kcnn2	Fut9	Cyb561		Derl3	Dsc1	Derl3		Rtn2	Ggt1	Hrh3
Hrasls	Ern1	Hhip		Kcnn3	Fzd9	Cyb561d1		Dlk2	Dscam	Dlk2		Ryr2	Gjc3	Htr3a
Il13ra2	Fam171b	Igf1r		Kcnq4	G6pc2	Cyb5r2		Dmpk	Egf	Dmpk		Ryr3	Gpam	Igfals
Il1rl1	Fam189a1	Il12rb2		Kcnq5	Gabra4	Cyp1a1		Dner	Elovl4	Dnajc10		Scn1a	Gpr26	Il17re
Il5ra	Fam210a	Jakmip2		Lct	Galnt9	Dagla		Dpp6	Entpd3	Dsc1		Slc24a3	Gpr62	Itga8
Itga8	Fkbp11	Jph2		Lgr5	Gfra3	Dapk1		Dscam	Epha3	Dscam		Slc26a3	Gria1	Jph2
Jph2	Flrt2	Jph4		Lrrc4b	Ggt1	Degs2		Egf	Erbb4	Edar		Slc30a10	Grin3a	Kcnb1
Jph4	Fmo1	Kcnb1		Lsamp	Gjc1	Dennd3		Epha3	Ern1	Egf		Slc30a2	Herpud1	Kcng1
Kcna1	Folr1	Kcnf1		Mcoln3	Gpr37l1	Derl3		Erbb4	Esyt3	Entpd3		Slc35f1	Hhip	Kcng4
Kcna6	Folr2	Kcng1		Mertk	Greb1	Dmpk		Faim2	Faim2	Erbb4		Slc5a3	Hrh3	Kcnh2
Kcnd2	Fut8	Kcng4		Mfsd2a	Gria1	Dnajb14		Fam171b	Fam171b	Ern1		Slc6a4	Htr3a	Kcnk1
Kcnf1	Fut9	Kcnk3		Mrap2	Grik4	Dnajc10		Fam189a1	Fam174b	Esyt3		Slc8a1	Igf1r	Kcnk3
Kcng1	Gabra4	Kcnma1		Mrvi1	Havcr1	Dner		Fam210a	Fam187b	Faim2		Sorcs3	Il12rb2	Kcnmb1
Kcnk3	Galnt9	Kcnmb1		Mylk	Hhip	Edar		Fkbp11	Fam189a1	Fam174b		Srd5a2	Il13ra2	Kcnn2
Kcnmb1	Gfra3	Kcnn2		Nmur2	Ifitm10	Egf		Flrt1	Fam210a	Fam187b		Sspn	Itga8	Kcnq4
Kcnn2	Ggt1	Kcnn3		Nrg2	Igf1r	Elfn1		Flrt2	Fbxo31	Fam189a1		Syt10	Itpripl2	Kcnq5
Kcnn3	Gjc2	Kcnq4		Nrn1	Il13ra2	Elfn2		Fmo1	Fkbp11	Fam210a		Tenm2	Jph2	Kel
Kcnq4	Golt1a	Kcnq5		Opn1sw	Il1rap	Entpd3		Folr2	Flrt1	Fam210b		Tmem132c	Jph4	Ldlrad3
Kcnq5	Gpr37l1	Krtcap2		Otof	Itga9	Erbb4		Fut1	Fmo2	Fas		Tmem252	Kcna6	Lgr5
Lgr5	Gprc6a	Ldlrad3		P2rx1	Jph2	Ern1		G6pc2	Fndc5	Fat3		Tmem47	Kcnb1	Lhfpl1
Lmo7	Gramd1a	Lgr5		Pappa2	Jph4	Esyt3		Gabra4	Fut1	Fbxo31		Trpm3	Kcng1	Lmbrd2
Lrit3	Greb1	Lman1		Pdia6	Kcnb1	Faim2		Galnt18	Fzd10	Fcamr		Tspan2	Kcng4	Lrrc52
Lrrc4b	Grik4	Lmo7		Pirt	Kcnc4	Fam171b		Galnt9	G6pc2	Fkbp11			Kcnh2	Lsamp
Lrrc8b	Grin2d	Lrrc4b		Pld5	Kcnd2	Fam174b		Gfra3	Gabra4	Flrt1			Kcnj14	Mc5r
Lsamp	Hbs1l	Lsamp		Pln	Kcne4	Fam187b		Ggt1	Galnt18	Fmo2			Kcnk3	Mcur1
Lyve1	Herpud1	Lyve1		Popdc2	Kcnf1	Fam189a1		Gjc1	Galnt9	Fndc5			Kcnmb1	Mmp16
Man2a1	Hhip	Magt1		Prlr	Kcng1	Fam210b		Gjc2	Gfra3	Fut1			Kcnn2	Mrvi1
Mcoln2	Igf1r	Man1c1		Prom2	Kcng2	Fas		Glrb	Ggt1	Fut2			Kcnn3	mt-Nd5
Mcoln3	Il12rb2	Man2a1		Ptprq	Kcng4	Fat3		Gpc3	Gpr37l1	Fut9			Kcnq4	Mylk
Mdga2	Il13ra2	Mboat4		Reck	Kcnh2	Fbxo31		Gpr37l1	Gpr62	Fzd10			Kcnq5	Nalcn
Mertk	Il1rap	Mcoln2		Rnf149	Kcnk3	Fcer1a		Gpr62	Gria1	G6pc2			Kel	Nlgn1
Mogat1	Itga8	Mcoln3		Rtn2	Kcnmb1	Fkbp11		Greb1	Herpud1	Gabra4			Lepr	Nmur2
Mrap2	Jakmip2	Mertk		Ryr2	Kcnn2	Flrt1		Gria1	Hhip	Gabra5			Lgr5	Nphs2
Mrvi1	Jph2	Mogat1		Ryr3	Kcnn3	Fmo2		Grin3a	Htr3a	Galnt18			Lhfpl1	Nrg2
Mylk	Jph4	Mrap2		Sccpdh	Kcnq4	Folr1		Gypc	Ica1	Galnt9			Lmbrd2	Ntrk3
Nell2	Kcna1	Mrvi1		Scn1a	Kcnq5	Frmd3		Heg1	Igf1r	Gfra3			Lsamp	Opn1sw
Nmur2	Kcna6	Mylk		Sgca	Lct	Frrs1l		Herpud1	Il13ra2	Ggt1			Lysmd3	Oprd1
Npr1	Kcnb1	Nbas		Sgcb	Lgr5	Fut2		Hhip	Itga8	Gjc3			Magt1	Oprk1
Nrcam	Kcnd2	Nkain1		Sgms2	Lrrc4b	Fut8		Htr3a	Itpripl2	Gpam			Mcur1	P2rx1
Opn1sw	Kcnf1	Nmur2		Slc16a10	Lsamp	Fut9		Il13ra2	Jag2	Gpr155			Mlec	P4htm
Otof	Kcng1	Npr1		Slc16a2	Lyve1	G6pc2		Il1rap	Jph1	Gpr37l1			Mogat1	Panx2
P2rx1	Kcng4	Opn1sw		Slc18a1	Mcoln3	Gabra4		Itga2b	Jph2	Gpr83			Mrap2	Pappa2
P4htm	Kcnh2	Ormdl3		Slc22a1	Mertk	Galnt18		Itga8	Jph4	Greb1			Mrgprg	Perp
Pappa2	Kcnk3	P2rx1		Slc24a3	Mfsd2a	Galnt9		Itga9	Kcnc4	Gria1			Mrvi1	Pgap2
Pdia6	Kcnma1	P4htm		Slc26a3	Mrap2	Gdpd5		Itpripl2	Kcng1	Havcr1			Mylk	Piezo2
Pirt	Kcnmb1	Panx2		Slc2a13	Mrvi1	Gfra3		Jph1	Kcng4	Herpud1			Nalcn	Pirt
Pln	Kcnn2	Pappa2		Slc30a10	Mylk	Ggt1		Jph2	Kcnh2	Hhip			Npr3	Pld5
Popdc2	Kcnn3	Pdia6		Slc30a2	Nell2	Gjb1		Jph4	Kcnk1	Htr3a			Nrg2	Pln
Prlr	Kcnq4	Pln		Slc35b4	Nkain4	Gjc3		Kcna5	Kcnk3	Ica1			Nrn1	Plp1
Prom1	Kcnq5	Plp1		Slc35d3	Nmur2	Gpr155		Kcna6	Kcnmb1	Ifitm10			Ntrk3	Popdc2
Psen2	Krtcap2	Popdc2		Slc35f1	Nrg2	Gpr22		Kcnb1	Kcnn2	Igf1r			Opn1sw	Prkaa2
Ptger3	Lgr5	Preb		Slc47a2	Nrn1	Gpr37l1		Kcnc4	Kcnn3	Igfals			Oprd1	Prlr
Pth1r	Lman1	Prlr		Slc4a5	Opn1sw	Gpr83		Kcnd2	Kcnq4	Il13ra2			Oprk1	Prom2
Ptprq	Lmo7	Prrt1		Slc4a9	Oprk1	Greb1		Kcnf1	Kcnq5	Il17re			P2rx1	Ptchd1
Reck	Lrrc4b	Psen2		Slc5a3	Otof	Gria1		Kcng1	Kel	Itga8			P2rx3	Ptgdr
Reep1	Lsamp	Ptprn2		Slc6a4	P2rx1	Grik3		Kcng4	Ldlrad3	Itpripl2			P4htm	Ptprt
Rnf149	Lyve1	Rabac1		Slc7a5	Pappa2	Havcr1		Kcnh2	Lhfpl1	Jag2			Panx2	Rtn2
Rtn2	Magt1	Rgsl1		Slc8a1	Pdia6	Herpud1		Kcnk3	Lmbrd2	Jph2			Pappa2	Scara5
Ryr2	Man2a1	Rhd		Snph	Pirt	Hhip		Kcnmb1	Lrrc4b	Kcnc4			Paqr3	Scn1a
Ryr3	Mcoln2	Rnf149		Sorcs3	Pld5	Htr3b		Kcnn2	Lsamp	Kcng1			Pdia6	Scn3a
Scara5	Mcoln3	Rtn2		Srd5a2	Pln	Ica1		Kcnn3	Magt1	Kcng4			Perp	Serp1
Sccpdh	Mertk	Ryr2		Sspn	Plp1	Ifitm10		Kcnq3	Mal	Kcnh2			Pgap2	Sfxn2
Scn3a	Mogat1	Ryr3		Ston2	Popdc2	Igf1r		Kcnq4	Mbtps1	Kcnk1			Pirt	Sgce
Scn4a	Mrap2	Scn3a		Syt10	Prima1	Igfals		Kcnq5	Mcur1	Kcnk3			Pld5	Sgms2
Sfxn2	Mrvi1	Sel1l3		Syvn1	Prlr	Igsf5		Kel	Megf9	Kcnma1			Pln	Sgpp1
Sgca	Myc	Sfxn2		Tacr2	Prom2	Ildr1		Kiss1r	Mfsd2a	Kcnn2			Plp1	Slc10a5
Sgcb	Mylk	Sgca		Tenm2	Prrt1	Itga8		Lepr	Mme	Kcnn3			Popdc2	Slc16a7
Sgms2	Nalcn	Sgms2		Timd4	Psen2	Jph2		Lgr5	Mrap2	Kcnq4			Prkaa2	Slc16a8
Slc10a6	Nkain1	Slc16a10		Tmed3	Ptger3	Jph4		Lhfpl1	Mrvi1	Kcnq5			Prlr	Slc17a9
Slc16a10	Nmur2	Slc16a7		Tmem132b	Pth1r	Kcna7		Lrrc4b	mt-Nd5	Kel			Prom2	Slc18a1
Slc16a2	Npr1	Slc18a1		Tmem132c	Ptprq	Kcnb1		Lsamp	Mylk	Ldlrad3			Prrg1	Slc1a3
Slc18a1	Nrcam	Slc1a3		Tmem252	Reck	Kcnc1		Lyve1	Ndrg2	Lhfpl1			Prrt1	Slc1a5
Slc1a3	Nrg1	Slc1a5		Tmem42	Reep1	Kcnc4		Mbtps1	Ndufa1	Lmbrd2			Ptchd1	Slc22a1
Slc22a1	Nrg2	Slc22a1		Tmem47	Rhd	Kcng1		Mertk	Nell2	Lrrc4b			Ptgdr	Slc24a3
Slc24a3	Nrp2	Slc24a3		Tmem97	Rnf149	Kcng2		Mme	Ninj2	Lsamp			Ptprq	Slc25a16
Slc25a35	Opn1sw	Slc25a23		Tnmd	Rtn2	Kcng4		Mrap2	Nmur2	Lyve1			Ptprt	Slc25a23
Slc26a3	Ormdl3	Slc25a35		Tspan2	Ryr2	Kcnh2		Mrgprg	Nrg2	Magt1			Reep1	Slc26a4
Slc2a13	P2rx1	Slc25a36		Uba5	Ryr3	Kcnh8		Mrvi1	Nrn1	Mal			Rrm2b	Slc30a10
Slc2a4	P2rx5	Slc26a3		Wnt2b	Sccpdh	Kcnj3		Mxra8	Opn1sw	Marc2			Rtn2	Slc35f1
Slc30a2	P4htm	Slc26a8		Zdhhc2	Scn1a	Kcnk1		Mylk	Opn3	Mbtps1			Ryr2	Slc46a3
Slc35b4	Panx2	Slc30a2			Sfxn2	Kcnk3		Nalcn	Oprd1	Mc5r			Ryr3	Slc47a2
Slc35g2	Pappa2	Slc35b4			Sgca	Kcnmb1		Ndrg2	Ormdl3	Mcur1			Scn3a	Slc4a9
Slc38a10	Pdia6	Slc35f1			Sgcb	Kcnn2		Nlgn1	Otof	Megf9			Scn4a	Slc5a3
Slc39a7	Pias2	Slc35g2			Sgcd	Kcnn3		Nmur2	P2rx1	Mfap3l			Serp1	Slc7a4
Slc41a2	Pln	Slc38a10			Sgms2	Kcnq2		Npr2	Panx2	Mfsd6			Sfxn2	Slc9a2
Slc43a1	Plp1	Slc41a2			Slc16a10	Kcnq3		Nrcam	Pappa2	Mme			Sgce	Slc9a7
Slc52a3	Popdc2	Slc47a2			Slc18a1	Kcnq4		Nrg2	Pdia6	Mrap2			Sgms2	Slco4c1
Slc5a3	Prlr	Slc52a3			Slc22a1	Kcnq5		Nrn1	Perp	Mrvi1			Sgpp1	Slitrk6
Slc6a4	Prokr2	Slc5a3			Slc24a3	Kcnt1		Nrxn2	Pgap2	mt-Nd5			Slc10a5	Smco4
Slc7a1	Prrt1	Slc7a1			Slc26a3	Lct		Opn1sw	Pgrmc2	mt-Nd6			Slc16a10	Smim5
Slc7a5	Prune2	Slc7a4			Slc2a13	Lhfpl4		Oprd1	Piezo2	Muc15			Slc16a7	Sorcs3
Slc7a8	Psen2	Slc7a5			Slc2a4	Lmbrd2		Oprk1	Pirt	Mylk			Slc16a8	Srd5a2
Slc8a1	Ptger3	Slc8a1			Slc30a10	Lmo7		P2rx1	Pld5	Nalcn			Slc18a1	Sybu
Slit2	Ptprq	Slc9a2			Slc30a2	Lrit3		P4htm	Pln	Ndrg2			Slc1a3	Syt10
Snph	Rabac1	Slc9a7			Slc35b4	Lrrc3		Pappa2	Plp1	Ndufa1			Slc22a1	Syt3
Sspn	Ramp1	Slco4c1			Slc35d3	Lrrc4b		Pdia6	Popdc2	Ninj2			Slc24a3	Syt7
Stx1b	Reck	Smim14			Slc35f1	Lrrn1		Pirt	Prima1	Nkpd1			Slc25a23	Tectb
Synpr	Reep1	Snph			Slc35g2	Lrrtm3		Pln	Prkaa2	Nmur2			Slc27a2	Tenm2
Syt10	Rhd	Ssr4			Slc41a2	Lsamp		Plp1	Prlr	Nrg2			Slc2a13	Tmed3
Tacr2	Rnf149	Sstr3			Slc47a2	Ly6g6d		Pmp22	Prom2	Nrxn1			Slc2a4	Tmem132b
Tgfbr3	Rtn2	Sybu			Slc52a3	Man1c1		Popdc2	Ptchd1	Nsg2			Slc30a10	Tmem132c
Timd4	Ryr2	Syne4			Slc5a3	Man2a1		Pqlc3	Ptprt	Ntrk3			Slc35f1	Tmem139
Tmed3	Ryr3	Syt10			Slc6a4	Mansc1		Prlr	Ptprz1	Opn1sw			Slc47a2	Tmem191c
Tmem132b	Scara5	Syt7			Slc7a5	Mcoln2		Prom2	Pxmp2	Opn3			Slc4a9	Tmem252
Tmem132c	Sccpdh	Syvn1			Slc8a1	Mcoln3		Prrg1	Rabac1	Oprd1			Slc5a3	Tmem45a
Tmem160	Scn3a	Tacr2			Slit2	Mdga2		Prrt1	Ramp1	Ormdl3			Slc7a4	Tmem56
Tmem252	Scn4a	Tcta			Slitrk5	Met		Psen2	Reep1	P2rx1			Slc9a2	Tnmd
Tmem42	Sec61b	Tenm2			Snph	Mfsd2a		Ptchd1	Rnf149	P2rx6			Slco4c1	Tram1
Tmem45a	Sema6c	Tgfbr3			Sorcs3	Mfsd6		Ptgdr	Rrm2b	P4htm			Slitrk6	Trpm3
Tmem47	Sfxn2	Tmed3			Srd5a2	Mme		Ptprb	Rtn2	Panx2			Smco4	Trpv6
Tmem97	Sgca	Tmem132b			Sspn	Mmp16		Ptpro	Ryr2	Pappa2			Smim1	Tspan5
Tshr	Sgms2	Tmem160			Ssr4	Mogat1		Ptprq	Ryr3	Paqr3			Srd5a2	Uba5
Tspan2	Slc16a10	Tmem218			Syndig1	Mpz		Ptprt	Scn1a	Pdia6			Sybu	Upk1a
Uba5	Slc16a2	Tmem252			Synpr	Mrap2		Ramp1	Scn3a	Pdzk1ip1			Syt10	Uts2r
Wdr11	Slc16a7	Tmem38a			Syt10	Mrvi1		Rcan2	Scn4a	Perp			Syt3	Xk
Yipf2	Slc18a1	Tmem42			Syvn1	Mylk		Reck	Sec61b	Pgap2			Syvn1
Zdhhc2	Slc1a3	Tmem45a			Tacr2	Ncam2		Reep1	Sel1l3	Pgrmc2			Tacr3
Znrf3	Slc22a1	Tmem47			Tenm2	Ndufa1		Rnf149	Serinc3	Piezo2			Tectb
	Slc24a3	Tmem97			Tgfbr3	Nell2		Rtn2	Serp1	Pigv			Tenm2
	Slc25a23	Tshr			Timd4	Ngfr		Ryr2	Sfxn2	Pirt			Tmed3
	Slc25a35	Tspan13			Tm9sf3	Ninj2		Ryr3	Sgca	Pld5			Tmem132b
	Slc26a3	Tspan2			Tmcc2	Nipal3		Scara5	Sgce	Pln			Tmem132c
	Slc2a13	Uba5			Tmed3	Nmur2		Sccpdh	Sgms2	Plp1			Tmem139
	Slc2a4	Vamp2			Tmem132b	Nrcam		Scn1a	Slc16a10	Popdc2			Tmem252
	Slc30a2	Wdr11			Tmem132c	Nrg4		Scn3a	Slc16a7	Prima1			Tmem38a
	Slc35b4	Yipf2			Tmem151a	Nrn1		Scn4a	Slc17a9	Prkaa2			Tmem45a
	Slc35f1				Tmem160	Nrsn1		Scn4b	Slc18a1	Prlr			Tmem47
	Slc35g2				Tmem252	Nrxn2		Sema6a	Slc1a3	Prom2			Tmem56
	Slc36a4				Tmem38a	Nsg2		Sfxn2	Slc1a5	Prss8			Tram1
	Slc38a10				Tmem42	Ocln		Sgca	Slc22a1	Ptchd1			Trpm3
	Slc41a2				Tmem47	Ogfod3		Sgcb	Slc24a3	Ptges			Trpv6
	Slc43a1				Tmem97	Opn1sw		Slc16a10	Slc25a16	Ptprn2			Tshr
	Slc52a3				Tnmd	Opn3		Slc18a1	Slc25a23	Ptprt			Tspan2
	Slc5a3				Tpm1	Oprd1		Slc22a1	Slc26a3	Ptprz1			Tspan5
	Slc6a4				Trpm3	Ormdl3		Slc24a3	Slc26a4	Rabac1			Ttc39c
	Slc7a1				Tspan2	Otof		Slc26a3	Slc2a4	Ramp1			Uba5
	Slc7a5				Uba5	P2rx1		Slc2a13	Slc30a10	Rhbg			Unc5a
	Slc7a8				Zdhhc2	Panx2		Slc2a4	Slc30a2	Rrm2b			Upk1a
	Slc8a1					Pappa2		Slc30a10	Slc35f1	Rtn2			Ush2a
	Slc9a2					Paqr5		Slc30a2	Slc38a1	Ryr2			Uts2r
	Snph					Pclo		Slc35f1	Slc46a3	Ryr3			Xk
	Spcs1					Pdia6		Slc4a9	Slc47a2	Scn1a
	Sspn					Pdzk1ip1		Slc5a3	Slc4a9	Scn3a
	Ssr4					Pgap2		Slc6a4	Slc5a3	Scn4a
	Sybu					Piezo2		Slc7a5	Slc7a11	Sel1l3
	Syne4					Pirt		Slc8a1	Slc7a4	Serinc3
	Syt10					Pkhd1		Slc9a2	Slc7a5	Serp1
	Tacr2					Pld5		Slco4a1	Slc9a2	Sft2d2
	Tcta					Pllp		Slitrk6	Slc9a7	Sfxn2
	Tenm2					Pln		Snph	Slco4a1	Sgca
	Tgfbr3					Plp1		Sorcs3	Slco4c1	Sgce
	Timd4					Popdc2		Srd5a2	Slitrk6	Sgms2
	Tmed3					Prima1		Sspn	Smim14	Sgpp1
	Tmem107					Prkaa2		Sybu	Smim5	Slc10a5
	Tmem132b					Prlr		Syt10	Snph	Slc12a2
	Tmem132c					Prom2		Tacr2	Spcs2	Slc16a10
	Tmem160					Prss8		Tenm2	Srd5a2	Slc16a7
	Tmem218					Ptprn2		Tgfbr3	Ssr4	Slc16a8
	Tmem252					Ptprt		Timd4	Sv2b	Slc18a1
	Tmem38a					Ptprz1		Tmed3	Sybu	Slc1a3
	Tmem42					Pxmp2		Tmem116	Syt10	Slc1a5
	Tmem45a					Ret		Tmem132b	Syt3	Slc22a1
	Tmem47					Rnf112		Tmem132c	Syt7	Slc24a3
	Tmem97					Rnf149		Tmem14a	Syvn1	Slc25a16
	Tspan2					Rtn1		Tmem252	Tacr2	Slc25a23
	Uba5					Rtn2		Tmem38a	Tacr3	Slc26a3
	Vamp2					Ryr2		Tmem45a	Tenm2	Slc26a4
	Wdr11					Ryr3		Tmem47	Tmc7	Slc2a4
	Yipf2					Scn3a		Tnmd	Tmed3	Slc30a10
	Yipf4					Scn4a		Trib2	Tmem132b	Slc30a2
	Zdhhc2					Scn5a		Trpm3	Tmem132c	Slc33a1
						Sel1l3		Trpv6	Tmem14a	Slc35d3
						Sema4a		Tspan2	Tmem184a	Slc35f1
						Sfxn2		Uba5	Tmem252	Slc44a3
						Sgca		Upk1a	Tmem38a	Slc45a3
						Sgce		Ush2a	Tmem42	Slc46a3
						Sgms2		Wnt2b	Tmem45a	Slc47a2
						Sidt1		Xk	Tmem47	Slc4a9
						Slc15a2		Zdhhc2	Tmem61	Slc5a1
						Slc16a10			Tmem64	Slc5a3
						Slc16a7			Tnmd	Slc6a14
						Slc16a8			Trabd	Slc6a4
						Slc18a1			Tram1	Slc7a4
						Slc1a3			Trib2	Slc7a5
						Slc1a5			Trpc5	Slc9a2
						Slc22a1			Trpm3	Slc9a7
						Slc24a3			Trpv6	Slco4a1
						Slc25a23			Tspan13	Slco4c1
						Slc25a33			Tspan2	Slitrk5
						Slc25a35			Tvp23b	Slitrk6
						Slc26a3			Uba5	Smco4
						Slc26a4			Upk1a	Smim1
						Slc28a3			Ush2a	Smim14
						Slc2a4			Uts2r	Smim5
						Slc30a10			Wnt2b	Sorcs3
						Slc30a2			Xk	Srd5a2
						Slc35a3			Yipf2	Ssr4
						Slc35d3			Zdhhc2	Sstr3
						Slc35f1				Sv2b
						Slc35g2				Sybu
						Slc45a1				Syne4
						Slc45a3				Syt10
						Slc46a3				Syt7
						Slc47a2				Syvn1
						Slc4a5				Tacr2
						Slc4a9				Tacr3
						Slc5a1				Tbc1d30
						Slc5a3				Tcta
						Slc6a14				Tenm2
						Slc6a4				Timd4
						Slc7a1				Tmc7
						Slc7a14				Tmed3
						Slc7a4				Tmem117
						Slc7a5				Tmem132b
						Slc8a1				Tmem132c
						Slc9a2				Tmem14a
						Slc9a7				Tmem159
						Slco4a1				Tmem184a
						Slco4c1				Tmem252
						Slitrk5				Tmem30b
						Slitrk6				Tmem38a
						Smagp				Tmem42
						Smim14				Tmem45a
						Smim5				Tmem52
						Snph				Tmem64
						Sorcs3				Tmprss13
						Sort1				Trabd
						Sstr3				Tram1
						St8sia3				Trpm3
						Stx3				Trpv6
						Suco				Tspan13
						Susd4				Tspan2
						Sv2b				Tvp23b
						Svop				Uba5
						Sybu				Upk1a
						Syne4				Ush2a
						Syp				Uts2r
						Syt1				Vipr1
						Syt2				Xk
						Syt3				Yipf2
						Syt7				Yipf6
						Syvn1				Znrf3
						Tacr2
						Tbc1d30
						Tcta
						Tenm2
						Tm9sf3
						Tmed3
						Tmem132b
						Tmem132c
						Tmem150c
						Tmem183a
						Tmem184a
						Tmem191c
						Tmem246
						Tmem252
						Tmem38a
						Tmem42
						Tmem47
						Tmem63c
						Tmem64
						Tmem97
						Tmprss13
						Tmprss2
						Tnmd
						Trabd
						Trpv6
						Tspan1
						Tspan13
						Tspan15
						Tspan2
						Ttc39a
						Uba5
						Upk1a
						Upk1b
						Vipr1
						Vopp1
						Xk
						Yipf2
						Zdhhc2
						Zdhhc23

## Sheet: common_genes
mPIN_up	MT_up	AT_up		mPIN_down	MT_down	AT_down
Abcg1	Abcc5	Abcc5		Adam11	A3galt2	A3galt2
Abcg5	Abcg1	Abcg1		Adcy5	Abca5	Abca5
Abcg8	Abcg5	Adam8		Art3	Adcy5	Abhd12
Adora2b	Abcg8	Adora2b		Asic4	Atp2b3	Acvr1c
Adrb1	Adcy8	Alpk1		Atp2b4	Bmpr1b	Adcy5
Atp10b	Adrb1	Amn		Cacna1c	Cacnb4	Adra1a
Atp2a3	Alpk1	Ankle1		Cav1	Cdh19	Aldh6a1
B3galt2	Ankle1	Atp10b		Cdh19	Clstn2	Asic4
B4galnt2	Atp10b	Bak1		Derl3	Ctns	Atp12a
Bace2	Atp2a3	Bok		Dmpk	Derl3	Bmpr1b
Best2	Bace2	Btc		Fam171b	Dmpk	Cd163
Btc	Btc	Ccr1		Flrt2	Dpp6	Chrm1
Cacna2d4	Cacna2d4	Ccr5		Galnt9	Egf	Cntnap2
Cdh1	Cd276	Cd276		Greb1	Fam171b	Derl3
Celsr1	Cd44	Cd44		Hhip	Fam189a1	Dmpk
Cftr	Cdh17	Cd72		Il13ra2	Fkbp11	Egf
Chl1	Cdh24	Cdh17		Jph2	Gabra4	Entpd3
Clec5a	Cdhr1	Cdh24		Kcng1	Galnt9	Fam189a1
Col25a1	Celsr1	Celsr1		Kcnmb1	Ggt1	Galnt9
Cxcl16	Cftr	Cftr		Kcnq4	Hhip	Ggt1
Cyba	Chst9	Ch25h		Kcnq5	Igf1r	Gpr37l1
Dhrs9	Clcn2	Chrnb1		Lgr5	Il13ra2	Herpud1
Epha2	Clec5a	Clec4e		Lsamp	Jph2	Hhip
Epha4	Col25a1	Clec5a		Mrvi1	Jph4	Jph2
Epsti1	Csf3r	Csf3r		Mylk	Kcng1	Kcng1
Ern2	Cxadr	Cxcl16		Nmur2	Kcng4	Kcng4
Espl1	Cxcl16	Cxcr4		Opn1sw	Kcnh2	Kcnk3
Eva1a	Cxcr4	Cyba		P2rx1	Kcnk3	Kcnn2
F3	Cyba	Dhrs9		Pappa2	Kcnmb1	Kcnq4
Fa2h	Dapl1	Dll4		Pirt	Kcnn2	Kcnq5
Fam57a	Dcbld1	Dram1		Pln	Kcnn3	Lsamp
Ffar4	Dhrs9	Epha2		Popdc2	Kcnq4	Mrvi1
Fut4	Dram1	Ephb2		Reck	Kcnq5	Mylk
Gabrp	Dsc3	Epsti1		Rtn2	Lsamp	Nmur2
Gde1	Epha2	Ern2		Ryr2	Mrap2	Opn1sw
Gp2	Epha4	Espl1		Ryr3	Mrvi1	P2rx1
Gpa33	Ephb2	F3		Slc24a3	Mylk	Panx2
Gprc5a	Epsti1	Fam57a		Slc26a3	Nrg2	Pappa2
Grid2	Ern2	Fcer1g		Slc30a2	Opn1sw	Pln
Has3	Espl1	Ffar4		Slc5a3	P2rx1	Plp1
Hpn	Eva1a	Fpr2		Slc6a4	Pappa2	Popdc2
Hsd11b2	F3	Gabre		Slc8a1	Pdia6	Prlr
Htr1d	Fa2h	Gabrp		Sspn	Pln	Rtn2
Icam1	Fam57a	Gcnt3		Syt10	Plp1	Scn3a
Ikzf1	Ffar4	Gpa33		Tmem132c	Popdc2	Sfxn2
Insrr	Fut4	Gpr141		Tmem252	Prlr	Sgms2
Itga2	Gabre	Gpr176		Tmem47	Reep1	Slc16a7
Itgb6	Gabrp	Gpr35		Tspan2	Rtn2	Slc18a1
Jakmip1	Gcnt3	Gpr65			Ryr2	Slc1a3
Kcne3	Gde1	Hmox1			Ryr3	Slc1a5
Kcnk5	Gp2	Hsd11b2			Sfxn2	Slc22a1
Lpcat4	Gpa33	Icam1			Sgms2	Slc24a3
Ly6d	Gpr35	Icam5			Slc16a10	Slc25a23
Ly6k	Gpr87	Ifitm3			Slc18a1	Slc35f1
Map3k1	Gprc5a	Igdcc4			Slc22a1	Slc47a2
Melk	Has3	Il10ra			Slc24a3	Slc5a3
Mmp15	Hsd11b2	Il21r			Slc2a4	Slc7a4
Msln	Htr1d	Il3ra			Slc35f1	Slc9a2
Muc1	Icam1	Insrr			Slc5a3	Slc9a7
Myof	Ifitm3	Itga2			Syt10	Slco4c1
Pigr	Igsf11	Itgal			Tenm2	Sybu
Pkmyt1	Insrr	Itgb6			Tmed3	Syt7
Qsox1	Itga2	Jakmip1			Tmem132b	Tenm2
Rnf122	Itgb6	Kcne3			Tmem132c	Tmed3
Rnf150	Jakmip1	Kcnk5			Tmem252	Tmem132b
Rnf213	Kcne3	Lag3			Tmem38a	Tmem252
Rnf223	Kcnk5	Lair1			Tmem47	Uba5
Rtp4	Kcnq1	Lst1			Tspan2
Slc10a2	Ly6d	Ly6d			Uba5
Slc16a3	Mall	Mall
Slc23a3	Map3k1	Melk
Slc25a48	Melk	Mgam
Slc34a2	Msln	Mgst2
Slc39a4	Mst1r	Mmp14
Slc40a1	Muc1	Msln
Smim6	Myof	Mst1r
Sptlc3	Paqr4	Mtfr2
Steap4	Pkmyt1	Muc1
Styk1	Plaur	Myof
Syt16	Pmepa1	Nrm
Syt8	Ptpru	Nup210l
Tacstd2	Qsox1	Osmr
Tcirg1	Rnf150	P2ry6
Tlr1	Rnf213	Parvg
Tlr2	Rnf223	Pcdhb5
Tmc5	Rtp4	Pear1
Tmem40	Scara3	Pkmyt1
Tmie	Sdc1	Plaur
Tmprss4	Slc10a2	Pmepa1
Tmprss6	Slc16a3	Ptger4
Tnfrsf12a	Slc23a3	Ptk7
Tnfsf10	Slc25a48	Relt
Trim59	Slc34a2	Rnf122
Tspan8	Slc39a4	Rtp4
Uba7	Slc40a1	Scimp
Ugt1a1	Smim6	Sdc1
Vsig1	St6galnac6	Sema6b
Vtcn1	Steap4	Slc10a2
	Styk1	Slc16a3
	Syt16	Slc23a3
	Syt8	Slc35d1
	Tacstd2	Slc40a1
	Tcirg1	Slc7a7
	Tfrc	Slc9a4
	Tlr1	Smim6
	Tlr2	Soat2
	Tmc5	St3gal4
	Tmem132a	Stx1a
	Tmem213	Styk1
	Tmem40	Syt16
	Tmem63a	Syt8
	Tmem82	Tcirg1
	Tmie	Tfrc
	Tmprss4	Tlr1
	Tmprss6	Tlr2
	Tnfrsf12a	Tmc5
	Tnfsf10	Tmem140
	Trim59	Tmem150b
	Tspan8	Tmem171
	Ttyh3	Tmem236
	Uba7	Tmem82
	Ugt1a1	Tmprss4
	Vsig1	Tmprss6
	Vtcn1	Tnfrsf10b
		Tnfrsf12a
		Tnfrsf1b
		Tnfrsf9
		Tnfsf10
		Trem1
		Trim59
		Trpm6
		Ttyh2
		Ttyh3
		Uba7
		Ugt1a1
		Xkr4
