# Supplementary material for: Prostate Cancer Secretome and Membrane Proteome from Pten Conditional Knockout Mice Identify Potential Biomarkers for Disease Progression
Source: Int J Mol Sci. 2022 Aug 17;23(16):9224. doi: 10.3390/ijms23169224 (PMC9409251; doi:10.3390/ijms23169224)
Supplement: Supplementary file 1 [file ijms-23-09224-s001.zip › 1. Selected_GO_by_EnrichR_Membrane_Proteins_Log10.xlsx]

## Sheet: GO_pin_up
Term	P-value	Adjusted P-value	log10	N genes
integral component of plasma membrane (GO:0005887)	1.58336e-13	1.72586e-11	10.763	32
protein tyrosine kinase activity (GO:0004713)	0.000190655	0.0121384	1.91584	5
hexosyltransferase activity (GO:0016758)	0.00029942	0.0142973	1.84475	5
ATP-binding cassette (ABC) transporter complex (GO:0043190)	0.000351943	0.0191809	1.71713	2
UDP-glycosyltransferase activity (GO:0008194)	0.000774727	0.0246621	1.60797	4
oligosaccharide biosynthetic process (GO:0009312)	0.000188149	0.034163	1.46644	3
carbohydrate biosynthetic process (GO:0016051)	0.000214265	0.034163	1.46644	3
galactolipid biosynthetic process (GO:0019375)	0.000351943	0.034163	1.46644	2
galactosylceramide biosynthetic process (GO:0006682)	0.000351943	0.034163	1.46644	2
glycosylceramide biosynthetic process (GO:0046476)	0.000491147	0.0382352	1.41754	2
galactosylceramide metabolic process (GO:0006681)	0.000652771	0.0419173	1.37761	2
PDZ domain binding (GO:0030165)	0.00366181	0.048748	1.31204	3

## Sheet: GO_pin_down
Term	P-value	Adjusted P-value	log10	N genes
inorganic cation transmembrane transport (GO:0098662)	3.76589e-11	2.10137e-08	7.6775	11
integral component of plasma membrane (GO:0005887)	3.13069e-10	2.37932e-08	7.62355	19
sarcoplasmic reticulum (GO:0016529)	1.04871e-09	3.98508e-08	7.39956	6
sarcolemma (GO:0042383)	2.58841e-09	6.55731e-08	7.18327	6
regulation of cytosolic calcium ion concentration (GO:0051480)	2.18341e-09	3.04585e-07	6.51629	8
cellular calcium ion homeostasis (GO:0006874)	3.3584e-08	3.12331e-06	5.50538	7
calcium ion transmembrane transport (GO:0070588)	2.04904e-06	6.35203e-05	4.19709	5
potassium channel activity (GO:0005267)	6.69528e-05	0.00268399	2.57122	4
intracellular ligand-gated ion channel activity (GO:0005217)	0.000305953	0.00487174	2.31232	2
smooth muscle contraction (GO:0006939)	0.000503894	0.00585776	2.23227	2
smooth endoplasmic reticulum (GO:0005790)	0.000939659	0.00714141	2.14622	2
sodium ion transmembrane transporter activity (GO:0015081)	0.00204875	0.0170729	1.76769	2

## Sheet: GO_med_up
Term	P-value	Adjusted P-value	log10	N genes
integral component of plasma membrane (GO:0005887)	8.07181e-19	9.76689e-17	16.0102	43
basolateral plasma membrane (GO:0016323)	3.48745e-08	2.10991e-06	5.67574	10
protein tyrosine kinase activity (GO:0004713)	4.93071e-06	0.00109955	2.95879	7
transmembrane receptor protein kinase activity (GO:0019199)	3.51221e-05	0.00261074	2.58324	5
transmembrane receptor protein tyrosine kinase activity (GO:0004714)	3.51221e-05	0.00261074	2.58324	5
chloride channel activity (GO:0005254)	4.80723e-05	0.00268003	2.57186	5
membrane raft (GO:0045121)	7.10896e-05	0.00286728	2.54253	7
neuron projection (GO:0043005)	0.000691431	0.0139438	1.85562	11
enzyme linked receptor protein signaling pathway (GO:0007167)	2.69696e-05	0.0243803	1.61296	7

## Sheet: GO_med_down
Term	P-value	Adjusted P-value	log10	N genes
potassium channel activity (GO:0005267)	2.52529e-11	3.83844e-09	8.41584	9
potassium ion transport (GO:0006813)	1.23109e-11	8.23602e-09	8.08428	10
sarcoplasmic reticulum (GO:0016529)	1.74008e-10	9.39645e-09	8.02704	7
integral component of plasma membrane (GO:0005887)	5.48609e-08	1.97499e-06	5.70443	20
endoplasmic reticulum membrane (GO:0005789)	2.9942e-05	0.000418439	3.37837	11
calcium ion transmembrane transporter activity (GO:0015085)	0.000906753	0.010602	1.97461	3
smooth endoplasmic reticulum (GO:0005790)	0.00193122	0.0185094	1.73261	2
glucose transmembrane transporter activity (GO:0005355)	0.00236113	0.0199385	1.70031	2

## Sheet: GO_high_up
Term	P-value	Adjusted P-value	log10	N genes
integral component of plasma membrane (GO:0005887)	1.5577e-19	1.74463e-17	16.7583	46
secretory granule membrane (GO:0030667)	4.86652e-08	2.72525e-06	5.56459	13
inflammatory response (GO:0006954)	5.05634e-07	0.000308184	3.51119	11
cellular response to cytokine stimulus (GO:0071345)	1.03557e-06	0.000420785	3.37594	15
neutrophil activation involved in immune response (GO:0002283)	2.7463e-05	0.00509802	2.2926	13
protein tyrosine kinase activity (GO:0004713)	9.59515e-05	0.00518138	2.28555	6
regulation of ERK1 and ERK2 cascade (GO:0070372)	3.71299e-05	0.00565768	2.24736	9
positive regulation of response to external stimulus (GO:0032103)	4.65974e-05	0.00631135	2.19988	7
positive regulation of MAPK cascade (GO:0043410)	0.000109631	0.00890931	2.05016	9
extracellular matrix organization (GO:0030198)	0.000216254	0.0123423	1.90861	9
focal adhesion (GO:0005925)	0.0013406	0.0136498	1.86487	9
endoplasmic reticulum membrane (GO:0005789)	0.00342997	0.0283377	1.54763	12

## Sheet: GO_high_down
Term	P-value	Adjusted P-value	log10	N genes
integral component of plasma membrane (GO:0005887)	2.39994e-12	2.27995e-10	9.64208	25
inorganic cation transmembrane transport (GO:0098662)	5.91213e-12	1.98056e-09	8.70321	13
potassium ion transport (GO:0006813)	9.07081e-12	2.02582e-09	8.6934	10
vascular transport (GO:0010232)	3.72326e-07	4.39266e-05	4.35727	6
sodium ion transmembrane transport (GO:0035725)	4.58935e-07	4.39266e-05	4.35727	6
potassium channel activity (GO:0005267)	5.9948e-07	0.000100113	3.99951	6
sarcoplasmic reticulum (GO:0016529)	1.54522e-05	0.000733978	3.13432	4
potassium ion transmembrane transporter activity (GO:0015079)	0.000166248	0.00347043	2.45962	3
