# Supplementary material for: Prostate Cancer Secretome and Membrane Proteome from Pten Conditional Knockout Mice Identify Potential Biomarkers for Disease Progression
Source: Int J Mol Sci. 2022 Aug 17;23(16):9224. doi: 10.3390/ijms23169224 (PMC9409251; doi:10.3390/ijms23169224)
Supplement: Supplementary file 1 [file ijms-23-09224-s001.zip › 1. Selected_GO_by_STRING_Membrane_Proteins_Log10.xlsx]

## Sheet: GO_String_Pin_Up
ID	Term	strength	false discovery rate (FDR)	log10	observed gene count
GO:0016021	Integral component of membrane	0.59	5.29e-33	32.2765	78
GO:0005887	Integral component of plasma membrane	0.76	9.7e-13	12.0132	30
GO:0009986	Cell surface	0.76	3.37e-09	8.47237	23
GO:0003008	System process	0.57	6e-05	4.22185	26
GO:0055085	Transmembrane transport	0.61	0.00075	3.12494	20
GO:0004888	Transmembrane signaling receptor activity	0.62	0.0026	2.58503	16
GO:0065008	Regulation of biological quality	0.34	0.0029	2.5376	37
GO:0035354	Toll-like receptor 1-Toll-like receptor 2 protein complex	2.36	0.0127	1.8962	2
GO:0050877	Nervous system process	0.53	0.0262	1.5817	16

## Sheet: GO_String_Pin_Down
ID	Term	strength	false discovery rate (FDR)	log10	observed gene count
GO:0006811	Ion transport	0.86	1.15e-08	7.9393	19
GO:0055085	Transmembrane transport	0.87	1.95e-08	7.70997	18
GO:0006874	Cellular calcium ion homeostasis	1.11	2.75e-08	7.56067	13
GO:0033017	Sarcoplasmic reticulum membrane	1.86	3.61e-06	5.44249	5
GO:0019722	Calcium-mediated signaling	1.34	1.68e-05	4.77469	7
GO:0003012	Muscle system process	1.18	2.41e-05	4.61798	8
GO:0006939	Smooth muscle contraction	1.55	0.0013	2.88606	4
GO:0035556	Intracellular signal transduction	0.56	0.0245	1.61083	11
GO:0014832	Urinary bladder smooth muscle contraction	1.88	0.0486	1.31336	2

## Sheet: GO_String_Med_Up
ID	Term	strength	false discovery rate (FDR)	log10	observed gene count
GO:0016021	Integral component of membrane	0.61	5.56e-46	45.2549	102
GO:0009986	Cell surface	0.74	6.43e-11	10.1918	28
GO:0012505	Endomembrane system	0.31	0.00017	3.76955	44
GO:0055085	Transmembrane transport	0.59	0.00026	3.58503	24
GO:0010647	Positive regulation of cell communication	0.42	0.0073	2.13668	26
GO:0007166	Cell surface receptor signaling pathway	0.41	0.0096	2.01773	25
GO:0004713	Protein tyrosine kinase activity	0.96	0.0097	2.01323	7
GO:0045937	Positive regulation of phosphate metabolic process	0.47	0.0154	1.81248	19
GO:0016477	Cell migration	0.5	0.0317	1.49894	15
GO:0006954	Inflammatory response	0.61	0.0337	1.47237	11

## Sheet: GO_String_Med_Down
ID	Term	strength	false discovery rate (FDR)	log10	observed gene count
GO:0016021	Integral component of membrane	0.63	7.98e-29	28.098	60
GO:0022857	Transmembrane transporter activity	0.92	2e-13	12.699	25
GO:0006811	Ion transport	0.8	4.39e-10	9.35754	24
GO:0005790	Smooth endoplasmic reticulum	1.65	2.53e-05	4.59688	5
GO:0042391	Regulation of membrane potential	0.9	0.0001	4	11
GO:0098796	Membrane protein complex	0.65	0.00014	3.85387	15
GO:0055082	Cellular chemical homeostasis	0.71	0.0015	2.82391	12
GO:0098797	Plasma membrane protein complex	0.76	0.0028	2.55284	9
GO:1904064	Positive regulation of cation transmembrane transport	1.06	0.0053	2.27572	6

## Sheet: GO_String_High_Up
ID	Term	strength	false discovery rate (FDR)	log10	observed gene count
GO:0004888	Transmembrane signaling receptor activity	0.8	1.38e-14	13.8601	34
GO:0002376	Immune system process	0.57	7.75e-10	9.1107	42
GO:0007166	Cell surface receptor signaling pathway	0.58	7.75e-10	9.1107	41
GO:0001817	Regulation of cytokine production	0.64	5.59e-05	4.25259	19
GO:0071345	Cellular response to cytokine stimulus	0.62	0.00018	3.74473	18
GO:0050900	Leukocyte migration	0.9	0.00029	3.5376	10
GO:0042110	T cell activation	0.75	0.0065	2.18709	9
GO:0032502	Developmental process	0.2	0.0122	1.91364	55
GO:0007229	Integrin-mediated signaling pathway	1.01	0.0178	1.74958	5
GO:0007275	Multicellular organism development	0.21	0.0207	1.68403	49
GO:0042127	Regulation of cell population proliferation	0.33	0.0415	1.38195	22
GO:0043408	Regulation of mapk cascade	0.46	0.0446	1.35067	13

## Sheet: GO_String_High_down
ID	Term	strength	false discovery rate (FDR)	log10	observed gene count
GO:0016021	Integral component of membrane	0.62	1.39e-27	26.857	58
GO:0022857	Transmembrane transporter activity	0.97	8.15e-16	15.0888	27
GO:0006811	Ion transport	0.85	3.89e-12	11.4101	26
GO:0015267	Channel activity	0.97	2.69e-06	5.57025	12
GO:0006874	Cellular calcium ion homeostasis	0.89	0.00012	3.92082	11
GO:0110165	Cellular anatomical entity	0.12	0.0021	2.67778	62
GO:0015171	Amino acid transmembrane transporter activity	1.25	0.0147	1.83268	4
GO:0033017	Sarcoplasmic reticulum membrane	1.49	0.0166	1.77989	3
GO:0043005	Neuron projection	0.46	0.0252	1.5986	14
