# Supplementary material for: Prostate Cancer Secretome and Membrane Proteome from Pten Conditional Knockout Mice Identify Potential Biomarkers for Disease Progression
Source: Int J Mol Sci. 2022 Aug 17;23(16):9224. doi: 10.3390/ijms23169224 (PMC9409251; doi:10.3390/ijms23169224)
Supplement: Supplementary file 1 [file ijms-23-09224-s001.zip › 2. Predicted-Secreted-Proteins_Pten_All_genes.xlsx]

## Sheet: AP
PROTEIN CLASS	PTEN - Up						PTEN - Down
Gene	PIN	MED	ADV				PIN	MED	ADV
A1BG	#N/A	#N/A	#N/A				#N/A	#N/A	#N/A
A2M	#N/A	#N/A	#N/A				#N/A	#N/A	#N/A
A2ML1	#N/A	#N/A	#N/A				#N/A	#N/A	#N/A
AADACL2	#N/A	#N/A	#N/A				#N/A	#N/A	#N/A
ABHD15	#N/A	#N/A	#N/A				#N/A	#N/A	#N/A
ABI3BP	#N/A	#N/A	#N/A				#N/A	#N/A	#N/A
ABO	Abo	Abo	Abo				#N/A	#N/A	#N/A
AC008687.1	#N/A	#N/A	#N/A				#N/A	#N/A	#N/A
AC233755.1	#N/A	#N/A	#N/A				#N/A	#N/A	#N/A
ACAN	#N/A	#N/A	#N/A				#N/A	#N/A	#N/A
ACE	#N/A	#N/A	#N/A				Ace	Ace	Ace
ACE2	#N/A	#N/A	#N/A				#N/A	#N/A	#N/A
ACP7	#N/A	#N/A	#N/A				#N/A	#N/A	#N/A
ACPP	#N/A	#N/A	#N/A				#N/A	#N/A	#N/A
ACR	#N/A	#N/A	#N/A				#N/A	#N/A	#N/A
ADA2	#N/A	#N/A	#N/A				#N/A	#N/A	#N/A
ADAM12	#N/A	#N/A	#N/A				#N/A	#N/A	#N/A
ADAM28	Adam28	Adam28	Adam28				#N/A	#N/A	#N/A
ADAM9	#N/A	#N/A	#N/A				#N/A	#N/A	#N/A
ADAMDEC1	#N/A	#N/A	#N/A				#N/A	#N/A	#N/A
ADAMTS1	#N/A	#N/A	#N/A				#N/A	#N/A	#N/A
ADAMTS10	#N/A	#N/A	#N/A				#N/A	#N/A	#N/A
ADAMTS12	#N/A	#N/A	#N/A				#N/A	#N/A	#N/A
ADAMTS13	#N/A	#N/A	#N/A				#N/A	#N/A	#N/A
ADAMTS14	#N/A	#N/A	#N/A				#N/A	#N/A	#N/A
ADAMTS15	#N/A	#N/A	Adamts15				#N/A	#N/A	#N/A
ADAMTS16	#N/A	#N/A	#N/A				#N/A	#N/A	#N/A
ADAMTS17	#N/A	#N/A	#N/A				#N/A	Adamts17	#N/A
ADAMTS18	#N/A	#N/A	#N/A				#N/A	#N/A	#N/A
ADAMTS19	#N/A	#N/A	#N/A				#N/A	#N/A	#N/A
ADAMTS2	#N/A	#N/A	#N/A				#N/A	#N/A	#N/A
ADAMTS20	#N/A	#N/A	#N/A				#N/A	#N/A	#N/A
ADAMTS3	#N/A	#N/A	#N/A				#N/A	#N/A	#N/A
ADAMTS4	#N/A	#N/A	#N/A				#N/A	#N/A	#N/A
ADAMTS5	#N/A	#N/A	#N/A				#N/A	#N/A	#N/A
ADAMTS6	#N/A	#N/A	#N/A				#N/A	#N/A	#N/A
ADAMTS7	#N/A	#N/A	#N/A				#N/A	#N/A	#N/A
ADAMTS8	#N/A	#N/A	#N/A				Adamts8	Adamts8	Adamts8
ADAMTS9	#N/A	#N/A	#N/A				#N/A	#N/A	#N/A
ADAMTSL1	#N/A	#N/A	#N/A				#N/A	#N/A	#N/A
ADAMTSL2	#N/A	#N/A	Adamtsl2				#N/A	#N/A	#N/A
ADAMTSL3	#N/A	#N/A	#N/A				#N/A	#N/A	#N/A
ADAMTSL4	#N/A	#N/A	Adamtsl4				#N/A	#N/A	#N/A
ADAMTSL5	#N/A	#N/A	#N/A				#N/A	#N/A	#N/A
ADCK1	#N/A	#N/A	#N/A				#N/A	#N/A	#N/A
ADCYAP1	#N/A	#N/A	#N/A				#N/A	#N/A	#N/A
ADGRB1	#N/A	#N/A	#N/A				#N/A	#N/A	#N/A
ADGRE3	#N/A	#N/A	#N/A				#N/A	#N/A	#N/A
ADGRE5	#N/A	#N/A	#N/A				#N/A	#N/A	#N/A
ADGRF1	#N/A	#N/A	#N/A				#N/A	#N/A	#N/A
ADGRG1	#N/A	#N/A	#N/A				#N/A	#N/A	#N/A
ADIPOQ	#N/A	#N/A	#N/A				#N/A	#N/A	Adipoq
ADM	#N/A	#N/A	#N/A				#N/A	#N/A	#N/A
ADM2	#N/A	#N/A	#N/A				#N/A	#N/A	#N/A
ADM5	#N/A	#N/A	#N/A				#N/A	#N/A	#N/A
AEBP1	#N/A	#N/A	#N/A				#N/A	#N/A	#N/A
AFM	#N/A	#N/A	#N/A				#N/A	#N/A	#N/A
AFP	#N/A	#N/A	#N/A				#N/A	#N/A	#N/A
AGER	#N/A	#N/A	#N/A				#N/A	#N/A	#N/A
AGGF1	#N/A	#N/A	#N/A				#N/A	#N/A	#N/A
AGRN	Agrn	Agrn	Agrn				#N/A	#N/A	#N/A
AGRP	#N/A	#N/A	#N/A				#N/A	#N/A	#N/A
AGT	#N/A	#N/A	#N/A				#N/A	#N/A	#N/A
AHSG	#N/A	#N/A	#N/A				#N/A	#N/A	#N/A
AIMP1	#N/A	#N/A	#N/A				#N/A	#N/A	#N/A
AKR1B10	#N/A	#N/A	#N/A				#N/A	#N/A	#N/A
ALB	#N/A	#N/A	#N/A				#N/A	#N/A	#N/A
ALKAL1	#N/A	#N/A	#N/A				#N/A	#N/A	#N/A
ALKAL2	#N/A	#N/A	#N/A				#N/A	#N/A	#N/A
AMBN	#N/A	#N/A	#N/A				#N/A	#N/A	#N/A
AMBP	#N/A	#N/A	#N/A				#N/A	#N/A	#N/A
AMELX	#N/A	#N/A	#N/A				#N/A	#N/A	#N/A
AMELY	#N/A	#N/A	#N/A				#N/A	#N/A	#N/A
AMH	#N/A	#N/A	#N/A				#N/A	#N/A	#N/A
AMTN	#N/A	#N/A	#N/A				#N/A	#N/A	#N/A
AMY1A	#N/A	#N/A	#N/A				#N/A	#N/A	#N/A
AMY1B	#N/A	#N/A	#N/A				#N/A	#N/A	#N/A
AMY1C	#N/A	#N/A	#N/A				#N/A	#N/A	#N/A
AMY2A	#N/A	#N/A	#N/A				#N/A	#N/A	#N/A
AMY2B	#N/A	#N/A	#N/A				#N/A	#N/A	#N/A
ANG	#N/A	#N/A	#N/A				Ang	Ang	Ang
ANGPT1	#N/A	#N/A	#N/A				#N/A	#N/A	#N/A
ANGPT2	#N/A	#N/A	#N/A				#N/A	#N/A	#N/A
ANGPT4	#N/A	#N/A	#N/A				#N/A	#N/A	#N/A
ANGPTL1	#N/A	#N/A	#N/A				#N/A	#N/A	#N/A
ANGPTL2	#N/A	#N/A	#N/A				#N/A	#N/A	#N/A
ANGPTL3	#N/A	#N/A	#N/A				#N/A	#N/A	#N/A
ANGPTL4	#N/A	#N/A	#N/A				#N/A	#N/A	#N/A
ANGPTL5	#N/A	#N/A	#N/A				#N/A	#N/A	#N/A
ANGPTL6	#N/A	#N/A	#N/A				#N/A	#N/A	#N/A
ANGPTL7	#N/A	#N/A	#N/A				#N/A	Angptl7	Angptl7
ANGPTL8	#N/A	#N/A	#N/A				#N/A	#N/A	#N/A
ANKDD1A	#N/A	#N/A	#N/A				#N/A	#N/A	#N/A
ANOS1	#N/A	#N/A	#N/A				#N/A	#N/A	#N/A
ANXA1	Anxa1	Anxa1	Anxa1				#N/A	#N/A	#N/A
ANXA2	Anxa2	Anxa2	Anxa2				#N/A	#N/A	#N/A
AOAH	#N/A	#N/A	#N/A				#N/A	#N/A	#N/A
AOC1	#N/A	#N/A	#N/A				#N/A	#N/A	#N/A
AOC3	#N/A	#N/A	#N/A				Aoc3	Aoc3	Aoc3
AP000790.4	#N/A	#N/A	#N/A				#N/A	#N/A	#N/A
AP002347.1	#N/A	#N/A	#N/A				#N/A	#N/A	#N/A
APCS	#N/A	#N/A	#N/A				#N/A	#N/A	#N/A
APELA	#N/A	#N/A	#N/A				#N/A	#N/A	#N/A
APLN	Apln	Apln	Apln				#N/A	#N/A	#N/A
APOA1	#N/A	#N/A	#N/A				#N/A	#N/A	#N/A
APOA2	#N/A	#N/A	#N/A				#N/A	#N/A	#N/A
APOA4	#N/A	#N/A	#N/A				#N/A	#N/A	#N/A
APOA5	#N/A	#N/A	#N/A				Apoa5	#N/A	#N/A
APOB	#N/A	#N/A	#N/A				#N/A	#N/A	#N/A
APOC1	#N/A	#N/A	#N/A				#N/A	#N/A	#N/A
APOC2	#N/A	#N/A	#N/A				#N/A	#N/A	#N/A
APOC3	#N/A	#N/A	#N/A				#N/A	#N/A	#N/A
APOC4	#N/A	#N/A	#N/A				#N/A	#N/A	#N/A
APOD	#N/A	#N/A	#N/A				#N/A	#N/A	Apod
APOE	#N/A	#N/A	#N/A				#N/A	#N/A	#N/A
APOF	#N/A	#N/A	#N/A				#N/A	#N/A	Apof
APOH	#N/A	#N/A	#N/A				#N/A	#N/A	#N/A
APOL1	#N/A	#N/A	#N/A				#N/A	#N/A	#N/A
APOL4	#N/A	#N/A	#N/A				#N/A	#N/A	#N/A
APOM	#N/A	#N/A	#N/A				#N/A	#N/A	#N/A
APOO	#N/A	#N/A	#N/A				#N/A	#N/A	#N/A
ARSF	#N/A	#N/A	#N/A				#N/A	#N/A	#N/A
ARSI	#N/A	#N/A	#N/A				#N/A	#N/A	#N/A
ARSJ	#N/A	#N/A	#N/A				#N/A	#N/A	#N/A
ARSK	#N/A	#N/A	#N/A				#N/A	#N/A	#N/A
ART4	#N/A	#N/A	#N/A				#N/A	#N/A	#N/A
ART5	#N/A	#N/A	#N/A				#N/A	#N/A	#N/A
ARTN	Artn	Artn	Artn				#N/A	#N/A	#N/A
ASIP	#N/A	#N/A	#N/A				#N/A	#N/A	#N/A
ASPN	#N/A	#N/A	#N/A				#N/A	Aspn	#N/A
ASTL	#N/A	#N/A	#N/A				#N/A	#N/A	#N/A
ATRN	Atrn	Atrn	Atrn				#N/A	#N/A	#N/A
AVP	#N/A	#N/A	#N/A				#N/A	#N/A	#N/A
AZGP1	#N/A	#N/A	#N/A				#N/A	Azgp1	Azgp1
AZU1	#N/A	#N/A	#N/A				#N/A	#N/A	#N/A
B3GAT1	#N/A	#N/A	#N/A				#N/A	#N/A	#N/A
BCAN	#N/A	#N/A	#N/A				#N/A	#N/A	#N/A
BCHE	#N/A	#N/A	#N/A				#N/A	#N/A	#N/A
BDNF	#N/A	#N/A	#N/A				#N/A	#N/A	#N/A
BGLAP	#N/A	#N/A	#N/A				#N/A	#N/A	#N/A
BGN	#N/A	#N/A	#N/A				#N/A	#N/A	#N/A
BMP1	#N/A	#N/A	#N/A				#N/A	#N/A	#N/A
BMP10	#N/A	#N/A	#N/A				#N/A	#N/A	#N/A
BMP15	#N/A	#N/A	#N/A				#N/A	#N/A	#N/A
BMP2	#N/A	#N/A	#N/A				#N/A	#N/A	#N/A
BMP3	#N/A	#N/A	#N/A				#N/A	#N/A	#N/A
BMP4	#N/A	#N/A	#N/A				#N/A	#N/A	#N/A
BMP5	#N/A	#N/A	#N/A				#N/A	#N/A	#N/A
BMP6	#N/A	#N/A	#N/A				#N/A	#N/A	#N/A
BMP7	#N/A	#N/A	#N/A				Bmp7	Bmp7	Bmp7
BMP8A	#N/A	#N/A	#N/A				#N/A	#N/A	#N/A
BMP8B	#N/A	#N/A	#N/A				#N/A	#N/A	#N/A
BMPER	#N/A	#N/A	#N/A				#N/A	#N/A	#N/A
BPI	#N/A	#N/A	#N/A				#N/A	#N/A	#N/A
BPIFA1	#N/A	#N/A	#N/A				#N/A	#N/A	#N/A
BPIFA2	#N/A	#N/A	#N/A				#N/A	#N/A	#N/A
BPIFA3	#N/A	#N/A	#N/A				#N/A	#N/A	#N/A
BPIFB1	#N/A	#N/A	#N/A				#N/A	#N/A	#N/A
BPIFB4	#N/A	#N/A	#N/A				#N/A	#N/A	#N/A
BPIFC	#N/A	#N/A	#N/A				#N/A	#N/A	#N/A
BRINP2	#N/A	#N/A	#N/A				#N/A	#N/A	#N/A
BRINP3	#N/A	#N/A	#N/A				#N/A	#N/A	#N/A
BSPH1	#N/A	#N/A	#N/A				#N/A	#N/A	#N/A
BTBD17	#N/A	Btbd17	Btbd17				#N/A	#N/A	#N/A
BTC	Btc	Btc	Btc				#N/A	#N/A	#N/A
BTD	#N/A	#N/A	#N/A				#N/A	#N/A	#N/A
BTN1A1	#N/A	#N/A	#N/A				#N/A	#N/A	#N/A
BX248415.1	#N/A	#N/A	#N/A				#N/A	#N/A	#N/A
C10orf95	#N/A	#N/A	#N/A				#N/A	#N/A	#N/A
C10orf99	#N/A	#N/A	#N/A				#N/A	#N/A	#N/A
C11orf45	#N/A	#N/A	#N/A				#N/A	#N/A	#N/A
C11orf94	#N/A	#N/A	#N/A				#N/A	#N/A	#N/A
C12orf49	#N/A	#N/A	#N/A				#N/A	#N/A	#N/A
C12orf73	#N/A	#N/A	#N/A				#N/A	#N/A	#N/A
C14orf93	#N/A	#N/A	#N/A				#N/A	#N/A	#N/A
C15orf61	#N/A	#N/A	#N/A				#N/A	#N/A	#N/A
C16orf89	#N/A	#N/A	#N/A				#N/A	#N/A	#N/A
C17orf67	#N/A	#N/A	#N/A				#N/A	#N/A	#N/A
C17orf99	#N/A	#N/A	#N/A				#N/A	#N/A	#N/A
C18orf54	#N/A	#N/A	#N/A				#N/A	#N/A	#N/A
C1orf54	#N/A	#N/A	#N/A				#N/A	#N/A	#N/A
C1orf56	#N/A	#N/A	#N/A				#N/A	#N/A	#N/A
C1QA	#N/A	#N/A	C1qa				#N/A	#N/A	#N/A
C1QB	#N/A	#N/A	C1qb				#N/A	#N/A	#N/A
C1QC	#N/A	#N/A	C1qc				#N/A	#N/A	#N/A
C1QL1	#N/A	#N/A	#N/A				#N/A	#N/A	#N/A
C1QL2	#N/A	#N/A	#N/A				#N/A	#N/A	#N/A
C1QL3	#N/A	#N/A	#N/A				#N/A	#N/A	#N/A
C1QL4	#N/A	#N/A	#N/A				#N/A	#N/A	#N/A
C1QTNF1	#N/A	#N/A	#N/A				#N/A	#N/A	#N/A
C1QTNF12	#N/A	#N/A	#N/A				#N/A	#N/A	#N/A
C1QTNF2	#N/A	#N/A	#N/A				#N/A	#N/A	#N/A
C1QTNF3	#N/A	#N/A	#N/A				#N/A	#N/A	#N/A
C1QTNF4	#N/A	#N/A	#N/A				#N/A	#N/A	#N/A
C1QTNF5	#N/A	#N/A	#N/A				#N/A	#N/A	#N/A
C1QTNF6	#N/A	#N/A	#N/A				#N/A	#N/A	#N/A
C1QTNF7	#N/A	#N/A	#N/A				#N/A	#N/A	#N/A
C1QTNF8	#N/A	#N/A	#N/A				#N/A	#N/A	#N/A
C1QTNF9	#N/A	#N/A	#N/A				#N/A	#N/A	#N/A
C1QTNF9B	#N/A	#N/A	#N/A				#N/A	#N/A	#N/A
C1R	#N/A	#N/A	#N/A				#N/A	#N/A	#N/A
C1RL	#N/A	#N/A	#N/A				C1rl	C1rl	C1rl
C1S	#N/A	#N/A	#N/A				#N/A	#N/A	#N/A
C2	#N/A	#N/A	#N/A				#N/A	#N/A	#N/A
C21orf62	#N/A	#N/A	#N/A				#N/A	#N/A	#N/A
C22orf15	#N/A	#N/A	#N/A				#N/A	#N/A	#N/A
C22orf46	#N/A	#N/A	#N/A				#N/A	#N/A	#N/A
C2orf40	#N/A	#N/A	#N/A				#N/A	#N/A	#N/A
C2orf66	#N/A	#N/A	#N/A				#N/A	#N/A	#N/A
C2orf69	#N/A	#N/A	#N/A				#N/A	#N/A	#N/A
C3	#N/A	#N/A	C3				#N/A	#N/A	#N/A
C3orf33	#N/A	#N/A	#N/A				#N/A	#N/A	#N/A
C3orf58	#N/A	#N/A	#N/A				#N/A	#N/A	#N/A
C4A	#N/A	#N/A	C4a				#N/A	#N/A	#N/A
C4B	#N/A	#N/A	C4b				#N/A	#N/A	#N/A
C4BPA	#N/A	#N/A	#N/A				#N/A	#N/A	#N/A
C4BPB	#N/A	#N/A	#N/A				#N/A	#N/A	#N/A
C4orf48	#N/A	#N/A	#N/A				#N/A	#N/A	#N/A
C5	#N/A	#N/A	#N/A				#N/A	#N/A	#N/A
C5orf38	#N/A	#N/A	#N/A				#N/A	#N/A	#N/A
C5orf46	#N/A	#N/A	#N/A				#N/A	#N/A	#N/A
C6	#N/A	#N/A	#N/A				#N/A	#N/A	#N/A
C6orf120	#N/A	#N/A	#N/A				#N/A	#N/A	#N/A
C6orf15	#N/A	#N/A	#N/A				#N/A	#N/A	#N/A
C6orf58	#N/A	#N/A	#N/A				#N/A	#N/A	#N/A
C7	#N/A	#N/A	#N/A				#N/A	#N/A	#N/A
C8A	#N/A	#N/A	#N/A				#N/A	#N/A	#N/A
C8B	#N/A	#N/A	#N/A				#N/A	#N/A	#N/A
C8G	#N/A	#N/A	#N/A				#N/A	#N/A	#N/A
C9	#N/A	#N/A	#N/A				#N/A	#N/A	#N/A
C9orf47	#N/A	#N/A	#N/A				#N/A	#N/A	#N/A
C9orf72	#N/A	#N/A	#N/A				#N/A	#N/A	#N/A
CA10	#N/A	#N/A	#N/A				#N/A	#N/A	#N/A
CA11	#N/A	#N/A	#N/A				#N/A	#N/A	#N/A
CA6	#N/A	#N/A	#N/A				#N/A	#N/A	#N/A
CALCA	Calca	Calca	Calca				#N/A	#N/A	#N/A
CALCB	#N/A	#N/A	Calcb				#N/A	#N/A	#N/A
CAMP	#N/A	#N/A	#N/A				#N/A	#N/A	#N/A
CARTPT	#N/A	#N/A	#N/A				#N/A	#N/A	#N/A
CATSPERG	#N/A	#N/A	#N/A				#N/A	#N/A	#N/A
CBLN1	#N/A	#N/A	#N/A				#N/A	#N/A	#N/A
CBLN2	#N/A	#N/A	#N/A				#N/A	#N/A	#N/A
CBLN3	Cbln3	Cbln3	Cbln3				#N/A	#N/A	#N/A
CBLN4	#N/A	#N/A	#N/A				#N/A	#N/A	#N/A
CCBE1	#N/A	#N/A	#N/A				#N/A	#N/A	#N/A
CCDC112	#N/A	#N/A	#N/A				#N/A	#N/A	#N/A
CCDC126	#N/A	#N/A	#N/A				Ccdc126	Ccdc126	#N/A
CCDC134	#N/A	#N/A	#N/A				#N/A	#N/A	#N/A
CCDC3	#N/A	#N/A	Ccdc3				#N/A	#N/A	#N/A
CCDC70	#N/A	#N/A	#N/A				#N/A	#N/A	#N/A
CCDC80	#N/A	#N/A	#N/A				#N/A	#N/A	#N/A
CCER2	#N/A	#N/A	#N/A				#N/A	#N/A	#N/A
CCK	Cck	Cck	Cck				#N/A	#N/A	#N/A
CCL1	#N/A	#N/A	#N/A				#N/A	#N/A	#N/A
CCL11	#N/A	#N/A	#N/A				Ccl11	Ccl11	Ccl11
CCL13	#N/A	#N/A	#N/A				#N/A	#N/A	#N/A
CCL14	#N/A	#N/A	#N/A				#N/A	#N/A	#N/A
CCL15	#N/A	#N/A	#N/A				#N/A	#N/A	#N/A
CCL16	#N/A	#N/A	#N/A				#N/A	#N/A	#N/A
CCL17	#N/A	#N/A	Ccl17				#N/A	#N/A	#N/A
CCL18	#N/A	#N/A	#N/A				#N/A	#N/A	#N/A
CCL19	#N/A	#N/A	#N/A				#N/A	#N/A	#N/A
CCL2	#N/A	#N/A	Ccl2				#N/A	#N/A	#N/A
CCL20	#N/A	#N/A	#N/A				#N/A	#N/A	#N/A
CCL21	#N/A	#N/A	#N/A				#N/A	#N/A	#N/A
CCL22	#N/A	#N/A	#N/A				#N/A	#N/A	#N/A
CCL23	#N/A	#N/A	#N/A				#N/A	#N/A	#N/A
CCL24	#N/A	#N/A	#N/A				Ccl24	Ccl24	#N/A
CCL25	#N/A	#N/A	#N/A				#N/A	#N/A	#N/A
CCL26	#N/A	#N/A	#N/A				#N/A	#N/A	#N/A
CCL27	#N/A	#N/A	#N/A				#N/A	#N/A	#N/A
CCL28	Ccl28	Ccl28	Ccl28				#N/A	#N/A	#N/A
CCL3	Ccl3	Ccl3	Ccl3				#N/A	#N/A	#N/A
CCL3L1	#N/A	#N/A	#N/A				#N/A	#N/A	#N/A
CCL4	Ccl4	Ccl4	Ccl4				#N/A	#N/A	#N/A
CCL4L2	#N/A	#N/A	#N/A				#N/A	#N/A	#N/A
CCL5	#N/A	#N/A	Ccl5				#N/A	#N/A	#N/A
CCL7	#N/A	#N/A	#N/A				#N/A	#N/A	#N/A
CCL8	#N/A	#N/A	#N/A				#N/A	#N/A	#N/A
CD14	Cd14	Cd14	Cd14				#N/A	#N/A	#N/A
CD163	#N/A	#N/A	#N/A				Cd163	Cd163	Cd163
CD40	#N/A	#N/A	#N/A				#N/A	#N/A	#N/A
CD40LG	#N/A	#N/A	#N/A				#N/A	#N/A	#N/A
CD44	Cd44	Cd44	Cd44				#N/A	#N/A	#N/A
CD55	#N/A	#N/A	#N/A				#N/A	#N/A	#N/A
CD5L	#N/A	#N/A	#N/A				#N/A	#N/A	#N/A
CD6	#N/A	#N/A	#N/A				#N/A	#N/A	#N/A
CDCP2	#N/A	#N/A	#N/A				#N/A	#N/A	#N/A
CDNF	#N/A	#N/A	#N/A				#N/A	#N/A	#N/A
CDSN	#N/A	Cdsn	Cdsn				#N/A	#N/A	#N/A
CEACAM16	#N/A	#N/A	#N/A				#N/A	#N/A	#N/A
CEL	#N/A	#N/A	#N/A				#N/A	#N/A	#N/A
CELA1	#N/A	#N/A	Cela1				#N/A	#N/A	#N/A
CELA2A	#N/A	#N/A	#N/A				#N/A	#N/A	#N/A
CELA2B	#N/A	#N/A	#N/A				#N/A	#N/A	#N/A
CELA3A	#N/A	#N/A	#N/A				#N/A	#N/A	#N/A
CELA3B	#N/A	#N/A	#N/A				#N/A	#N/A	#N/A
CEMIP	#N/A	#N/A	#N/A				#N/A	#N/A	#N/A
CER1	#N/A	#N/A	#N/A				#N/A	#N/A	#N/A
CES4A	#N/A	#N/A	#N/A				#N/A	#N/A	#N/A
CES5A	#N/A	#N/A	#N/A				#N/A	#N/A	#N/A
CETP	#N/A	#N/A	#N/A				#N/A	#N/A	#N/A
CFB	#N/A	Cfb	Cfb				#N/A	#N/A	#N/A
CFC1	#N/A	#N/A	#N/A				#N/A	#N/A	#N/A
CFC1B	#N/A	#N/A	#N/A				#N/A	#N/A	#N/A
CFD	#N/A	#N/A	#N/A				#N/A	#N/A	#N/A
CFH	#N/A	#N/A	#N/A				#N/A	#N/A	#N/A
CFHR1	#N/A	#N/A	#N/A				#N/A	#N/A	#N/A
CFHR2	#N/A	#N/A	#N/A				#N/A	#N/A	#N/A
CFHR3	#N/A	#N/A	#N/A				#N/A	#N/A	#N/A
CFHR4	#N/A	#N/A	#N/A				#N/A	#N/A	#N/A
CFHR5	#N/A	#N/A	#N/A				#N/A	#N/A	#N/A
CFI	Cfi	Cfi	Cfi				#N/A	#N/A	#N/A
CFP	#N/A	#N/A	#N/A				#N/A	#N/A	#N/A
CGA	#N/A	#N/A	#N/A				#N/A	#N/A	#N/A
CGB1	#N/A	#N/A	#N/A				#N/A	#N/A	#N/A
CGB2	#N/A	#N/A	#N/A				#N/A	#N/A	#N/A
CGB3	#N/A	#N/A	#N/A				#N/A	#N/A	#N/A
CGB5	#N/A	#N/A	#N/A				#N/A	#N/A	#N/A
CGB7	#N/A	#N/A	#N/A				#N/A	#N/A	#N/A
CGB8	#N/A	#N/A	#N/A				#N/A	#N/A	#N/A
CGREF1	#N/A	#N/A	#N/A				Cgref1	Cgref1	Cgref1
CHAD	#N/A	#N/A	#N/A				#N/A	#N/A	#N/A
CHADL	#N/A	#N/A	#N/A				#N/A	#N/A	#N/A
CHI3L1	#N/A	#N/A	#N/A				#N/A	#N/A	#N/A
CHI3L2	#N/A	#N/A	#N/A				#N/A	#N/A	#N/A
CHIT1	#N/A	#N/A	#N/A				#N/A	#N/A	#N/A
CHRD	#N/A	#N/A	#N/A				#N/A	#N/A	#N/A
CHRDL1	#N/A	#N/A	#N/A				#N/A	Chrdl1	#N/A
CHRDL2	#N/A	#N/A	#N/A				#N/A	#N/A	#N/A
CHSY1	#N/A	#N/A	#N/A				#N/A	#N/A	#N/A
CILP	#N/A	#N/A	#N/A				#N/A	#N/A	#N/A
CILP2	#N/A	#N/A	#N/A				#N/A	#N/A	#N/A
CKLF	#N/A	#N/A	#N/A				#N/A	#N/A	#N/A
CLCA1	#N/A	#N/A	#N/A				#N/A	#N/A	#N/A
CLCF1	#N/A	#N/A	#N/A				#N/A	#N/A	#N/A
CLEC11A	#N/A	#N/A	#N/A				#N/A	#N/A	#N/A
CLEC18A	#N/A	#N/A	#N/A				Clec18a	Clec18a	Clec18a
CLEC18B	#N/A	#N/A	#N/A				#N/A	#N/A	#N/A
CLEC18C	#N/A	#N/A	#N/A				#N/A	#N/A	#N/A
CLEC19A	#N/A	#N/A	#N/A				#N/A	#N/A	#N/A
CLEC3A	#N/A	#N/A	#N/A				#N/A	#N/A	#N/A
CLEC3B	#N/A	#N/A	#N/A				Clec3b	Clec3b	#N/A
CLPS	Clps	#N/A	Clps				#N/A	#N/A	#N/A
CLPSL1	#N/A	#N/A	#N/A				#N/A	#N/A	#N/A
CLPSL2	#N/A	#N/A	#N/A				#N/A	#N/A	#N/A
CLU	Clu	Clu	Clu				#N/A	#N/A	#N/A
CLUL1	#N/A	#N/A	#N/A				#N/A	#N/A	#N/A
CMA1	#N/A	#N/A	#N/A				Cma1	Cma1	#N/A
CNBD1	#N/A	#N/A	#N/A				#N/A	#N/A	#N/A
CNDP1	#N/A	#N/A	#N/A				#N/A	#N/A	#N/A
CNMD	#N/A	#N/A	#N/A				#N/A	#N/A	#N/A
CNTN2	#N/A	#N/A	#N/A				#N/A	#N/A	#N/A
COCH	#N/A	#N/A	#N/A				#N/A	#N/A	#N/A
COL10A1	#N/A	#N/A	#N/A				#N/A	#N/A	#N/A
COL11A1	#N/A	#N/A	#N/A				#N/A	#N/A	#N/A
COL11A2	Col11a2	Col11a2	Col11a2				#N/A	#N/A	#N/A
COL12A1	#N/A	#N/A	#N/A				#N/A	#N/A	#N/A
COL14A1	#N/A	#N/A	#N/A				#N/A	#N/A	#N/A
COL15A1	#N/A	#N/A	#N/A				#N/A	#N/A	#N/A
COL16A1	#N/A	#N/A	Col16a1				#N/A	#N/A	#N/A
COL17A1	#N/A	Col17a1	Col17a1				#N/A	#N/A	#N/A
COL18A1	#N/A	#N/A	#N/A				#N/A	#N/A	#N/A
COL19A1	#N/A	#N/A	#N/A				#N/A	#N/A	#N/A
COL1A1	#N/A	#N/A	#N/A				#N/A	#N/A	#N/A
COL1A2	#N/A	#N/A	#N/A				#N/A	#N/A	#N/A
COL20A1	#N/A	#N/A	#N/A				#N/A	#N/A	#N/A
COL21A1	#N/A	#N/A	#N/A				#N/A	#N/A	#N/A
COL22A1	#N/A	#N/A	#N/A				#N/A	#N/A	#N/A
COL24A1	#N/A	#N/A	#N/A				#N/A	#N/A	#N/A
COL26A1	#N/A	#N/A	#N/A				#N/A	#N/A	#N/A
COL27A1	#N/A	#N/A	#N/A				#N/A	#N/A	#N/A
COL28A1	#N/A	#N/A	#N/A				Col28a1	#N/A	#N/A
COL2A1	#N/A	#N/A	#N/A				#N/A	#N/A	#N/A
COL3A1	#N/A	#N/A	#N/A				#N/A	#N/A	#N/A
COL4A1	#N/A	#N/A	#N/A				#N/A	#N/A	#N/A
COL4A2	#N/A	#N/A	#N/A				#N/A	#N/A	#N/A
COL4A3	#N/A	#N/A	#N/A				#N/A	#N/A	#N/A
COL4A4	#N/A	#N/A	#N/A				#N/A	#N/A	#N/A
COL4A5	#N/A	#N/A	#N/A				#N/A	#N/A	#N/A
COL4A6	#N/A	#N/A	#N/A				Col4a6	Col4a6	Col4a6
COL5A1	#N/A	#N/A	#N/A				#N/A	#N/A	#N/A
COL5A2	#N/A	#N/A	#N/A				#N/A	#N/A	#N/A
COL5A3	#N/A	#N/A	#N/A				#N/A	#N/A	#N/A
COL6A1	#N/A	#N/A	#N/A				#N/A	#N/A	#N/A
COL6A2	#N/A	#N/A	#N/A				#N/A	#N/A	#N/A
COL6A3	#N/A	#N/A	#N/A				#N/A	#N/A	#N/A
COL6A5	#N/A	#N/A	#N/A				#N/A	#N/A	#N/A
COL6A6	#N/A	#N/A	#N/A				Col6a6	Col6a6	#N/A
COL7A1	#N/A	Col7a1	Col7a1				#N/A	#N/A	#N/A
COL8A1	#N/A	#N/A	#N/A				#N/A	#N/A	#N/A
COL8A2	#N/A	#N/A	#N/A				#N/A	#N/A	#N/A
COL9A1	#N/A	#N/A	#N/A				#N/A	#N/A	#N/A
COL9A2	#N/A	#N/A	#N/A				#N/A	#N/A	#N/A
COL9A3	#N/A	Col9a3	Col9a3				#N/A	#N/A	#N/A
COLEC10	#N/A	#N/A	#N/A				#N/A	#N/A	#N/A
COLEC11	#N/A	#N/A	#N/A				#N/A	#N/A	#N/A
COLQ	#N/A	#N/A	Colq				#N/A	#N/A	#N/A
COMP	#N/A	#N/A	#N/A				#N/A	#N/A	#N/A
COPA	#N/A	#N/A	#N/A				#N/A	#N/A	#N/A
CORT	#N/A	#N/A	#N/A				#N/A	#N/A	#N/A
CP	#N/A	Cp	Cp				#N/A	#N/A	#N/A
CPA1	#N/A	#N/A	#N/A				#N/A	#N/A	#N/A
CPA2	#N/A	#N/A	#N/A				#N/A	#N/A	#N/A
CPA3	#N/A	#N/A	#N/A				Cpa3	Cpa3	Cpa3
CPA4	#N/A	#N/A	#N/A				#N/A	#N/A	#N/A
CPA5	#N/A	#N/A	#N/A				#N/A	#N/A	#N/A
CPA6	#N/A	#N/A	#N/A				#N/A	#N/A	#N/A
CPAMD8	#N/A	#N/A	#N/A				#N/A	#N/A	#N/A
CPB1	#N/A	#N/A	#N/A				#N/A	#N/A	#N/A
CPB2	#N/A	#N/A	#N/A				#N/A	#N/A	#N/A
CPN1	#N/A	Cpn1	Cpn1				#N/A	#N/A	#N/A
CPN2	#N/A	#N/A	#N/A				#N/A	#N/A	#N/A
CPQ	#N/A	#N/A	#N/A				#N/A	#N/A	#N/A
CPXM1	#N/A	#N/A	#N/A				#N/A	#N/A	#N/A
CPXM2	#N/A	#N/A	#N/A				#N/A	#N/A	#N/A
CPZ	#N/A	#N/A	#N/A				#N/A	#N/A	#N/A
CREG1	#N/A	#N/A	#N/A				#N/A	Creg1	#N/A
CREG2	#N/A	#N/A	#N/A				Creg2	Creg2	Creg2
CRELD2	#N/A	#N/A	#N/A				#N/A	#N/A	Creld2
CRH	#N/A	#N/A	#N/A				#N/A	#N/A	#N/A
CRHBP	#N/A	#N/A	#N/A				#N/A	#N/A	#N/A
CRHR2	#N/A	#N/A	#N/A				#N/A	#N/A	#N/A
CRISP1	#N/A	#N/A	#N/A				#N/A	#N/A	#N/A
CRISP2	#N/A	#N/A	#N/A				#N/A	#N/A	#N/A
CRISP3	#N/A	#N/A	#N/A				#N/A	#N/A	#N/A
CRISPLD1	#N/A	#N/A	#N/A				#N/A	#N/A	#N/A
CRISPLD2	#N/A	#N/A	#N/A				#N/A	#N/A	#N/A
CRLF1	#N/A	#N/A	#N/A				#N/A	#N/A	#N/A
CRP	#N/A	#N/A	#N/A				#N/A	#N/A	#N/A
CRTAC1	#N/A	#N/A	#N/A				#N/A	#N/A	#N/A
CRTAP	#N/A	#N/A	#N/A				#N/A	#N/A	#N/A
CSF1	#N/A	#N/A	#N/A				#N/A	#N/A	#N/A
CSF2	#N/A	#N/A	#N/A				#N/A	#N/A	#N/A
CSF2RA	#N/A	#N/A	#N/A				#N/A	#N/A	#N/A
CSF3	#N/A	#N/A	Csf3				#N/A	#N/A	#N/A
CSH1	#N/A	#N/A	#N/A				#N/A	#N/A	#N/A
CSH2	#N/A	#N/A	#N/A				#N/A	#N/A	#N/A
CSHL1	#N/A	#N/A	#N/A				#N/A	#N/A	#N/A
CSN1S1	#N/A	#N/A	#N/A				#N/A	#N/A	#N/A
CSN2	#N/A	#N/A	#N/A				#N/A	#N/A	#N/A
CSN3	#N/A	#N/A	#N/A				#N/A	#N/A	#N/A
CST1	#N/A	#N/A	#N/A				#N/A	#N/A	#N/A
CST11	#N/A	#N/A	#N/A				#N/A	#N/A	#N/A
CST2	#N/A	#N/A	#N/A				#N/A	#N/A	#N/A
CST3	#N/A	#N/A	#N/A				#N/A	#N/A	#N/A
CST4	#N/A	#N/A	#N/A				#N/A	#N/A	#N/A
CST5	#N/A	#N/A	#N/A				#N/A	#N/A	#N/A
CST6	#N/A	#N/A	#N/A				#N/A	#N/A	#N/A
CST7	#N/A	#N/A	#N/A				#N/A	#N/A	#N/A
CST8	#N/A	#N/A	#N/A				#N/A	#N/A	#N/A
CST9	#N/A	#N/A	#N/A				#N/A	#N/A	#N/A
CST9L	#N/A	#N/A	#N/A				#N/A	#N/A	#N/A
CSTL1	#N/A	#N/A	#N/A				#N/A	#N/A	#N/A
CT55	#N/A	#N/A	#N/A				#N/A	#N/A	#N/A
CTF1	#N/A	#N/A	#N/A				#N/A	#N/A	#N/A
CTGF	#N/A	#N/A	#N/A				#N/A	#N/A	#N/A
CTHRC1	#N/A	#N/A	Cthrc1				#N/A	#N/A	#N/A
CTRB1	#N/A	#N/A	#N/A				#N/A	#N/A	#N/A
CTRB2	#N/A	#N/A	#N/A				#N/A	#N/A	#N/A
CTRC	#N/A	#N/A	#N/A				#N/A	#N/A	#N/A
CTRL	#N/A	#N/A	#N/A				#N/A	#N/A	#N/A
CTSB	Ctsb	Ctsb	Ctsb				#N/A	#N/A	#N/A
CTSD	#N/A	#N/A	#N/A				#N/A	#N/A	#N/A
CTSW	#N/A	Ctsw	#N/A				#N/A	#N/A	#N/A
CUTA	#N/A	#N/A	#N/A				#N/A	#N/A	#N/A
CX3CL1	Cx3cl1	Cx3cl1	Cx3cl1				#N/A	#N/A	#N/A
CXCL1	Cxcl1	Cxcl1	Cxcl1				#N/A	#N/A	#N/A
CXCL10	#N/A	Cxcl10	Cxcl10				#N/A	#N/A	#N/A
CXCL11	Cxcl11	Cxcl11	Cxcl11				#N/A	#N/A	#N/A
CXCL12	#N/A	#N/A	#N/A				Cxcl12	#N/A	#N/A
CXCL13	#N/A	Cxcl13	Cxcl13				#N/A	#N/A	#N/A
CXCL14	#N/A	#N/A	#N/A				#N/A	#N/A	#N/A
CXCL16	Cxcl16	Cxcl16	Cxcl16				#N/A	#N/A	#N/A
CXCL17	Cxcl17	Cxcl17	Cxcl17				#N/A	#N/A	#N/A
CXCL2	Cxcl2	Cxcl2	Cxcl2				#N/A	#N/A	#N/A
CXCL3	Cxcl3	Cxcl3	Cxcl3				#N/A	#N/A	#N/A
CXCL5	Cxcl5	Cxcl5	Cxcl5				#N/A	#N/A	#N/A
CXCL6	#N/A	#N/A	#N/A				#N/A	#N/A	#N/A
CXCL8	#N/A	#N/A	#N/A				#N/A	#N/A	#N/A
CXCL9	#N/A	#N/A	#N/A				#N/A	#N/A	#N/A
CXorf36	#N/A	#N/A	#N/A				#N/A	#N/A	#N/A
CYB5D2	#N/A	#N/A	#N/A				#N/A	#N/A	#N/A
CYR61	#N/A	#N/A	Cyr61				#N/A	#N/A	#N/A
CYTL1	#N/A	#N/A	#N/A				Cytl1	Cytl1	Cytl1
DAND5	#N/A	#N/A	#N/A				#N/A	#N/A	#N/A
DCD	#N/A	#N/A	#N/A				#N/A	#N/A	#N/A
DCN	#N/A	#N/A	#N/A				#N/A	#N/A	#N/A
DEFA4	#N/A	#N/A	#N/A				#N/A	#N/A	#N/A
DEFA5	#N/A	#N/A	#N/A				#N/A	#N/A	#N/A
DEFA6	#N/A	#N/A	#N/A				#N/A	#N/A	#N/A
DEFB1	#N/A	#N/A	#N/A				#N/A	Defb1	Defb1
DEFB103A	#N/A	#N/A	#N/A				#N/A	#N/A	#N/A
DEFB103B	#N/A	#N/A	#N/A				#N/A	#N/A	#N/A
DEFB104A	#N/A	#N/A	#N/A				#N/A	#N/A	#N/A
DEFB104B	#N/A	#N/A	#N/A				#N/A	#N/A	#N/A
DEFB105A	#N/A	#N/A	#N/A				#N/A	#N/A	#N/A
DEFB105B	#N/A	#N/A	#N/A				#N/A	#N/A	#N/A
DEFB106A	#N/A	#N/A	#N/A				#N/A	#N/A	#N/A
DEFB106B	#N/A	#N/A	#N/A				#N/A	#N/A	#N/A
DEFB107A	#N/A	#N/A	#N/A				#N/A	#N/A	#N/A
DEFB107B	#N/A	#N/A	#N/A				#N/A	#N/A	#N/A
DEFB108B	#N/A	#N/A	#N/A				#N/A	#N/A	#N/A
DEFB110	#N/A	#N/A	#N/A				#N/A	#N/A	#N/A
DEFB112	#N/A	#N/A	#N/A				#N/A	#N/A	#N/A
DEFB113	#N/A	#N/A	#N/A				#N/A	#N/A	#N/A
DEFB114	#N/A	#N/A	#N/A				#N/A	#N/A	#N/A
DEFB115	#N/A	#N/A	#N/A				#N/A	#N/A	#N/A
DEFB116	#N/A	#N/A	#N/A				#N/A	#N/A	#N/A
DEFB118	#N/A	#N/A	#N/A				#N/A	#N/A	#N/A
DEFB119	#N/A	#N/A	#N/A				#N/A	#N/A	#N/A
DEFB121	#N/A	#N/A	#N/A				#N/A	#N/A	#N/A
DEFB123	#N/A	#N/A	#N/A				#N/A	#N/A	#N/A
DEFB124	#N/A	#N/A	#N/A				#N/A	#N/A	#N/A
DEFB125	#N/A	#N/A	#N/A				#N/A	#N/A	#N/A
DEFB126	#N/A	#N/A	#N/A				#N/A	#N/A	#N/A
DEFB127	#N/A	#N/A	#N/A				#N/A	#N/A	#N/A
DEFB128	#N/A	#N/A	#N/A				#N/A	#N/A	#N/A
DEFB129	#N/A	#N/A	#N/A				#N/A	#N/A	#N/A
DEFB130A	#N/A	#N/A	#N/A				#N/A	#N/A	#N/A
DEFB130B	#N/A	#N/A	#N/A				#N/A	#N/A	#N/A
DEFB131A	#N/A	#N/A	#N/A				#N/A	#N/A	#N/A
DEFB131B	#N/A	#N/A	#N/A				#N/A	#N/A	#N/A
DEFB132	#N/A	#N/A	#N/A				#N/A	#N/A	#N/A
DEFB133	#N/A	#N/A	#N/A				#N/A	#N/A	#N/A
DEFB134	#N/A	#N/A	#N/A				#N/A	#N/A	#N/A
DEFB135	#N/A	#N/A	#N/A				#N/A	#N/A	#N/A
DEFB136	#N/A	#N/A	#N/A				#N/A	#N/A	#N/A
DEFB4A	#N/A	#N/A	#N/A				#N/A	#N/A	#N/A
DEFB4B	#N/A	#N/A	#N/A				#N/A	#N/A	#N/A
DHH	#N/A	#N/A	#N/A				#N/A	#N/A	#N/A
DHRS13	#N/A	#N/A	#N/A				#N/A	#N/A	#N/A
DHRS4L2	#N/A	#N/A	#N/A				#N/A	#N/A	#N/A
DHRS7C	#N/A	#N/A	#N/A				#N/A	#N/A	#N/A
DHRSX	#N/A	#N/A	#N/A				#N/A	#N/A	#N/A
DKK1	#N/A	#N/A	#N/A				#N/A	#N/A	#N/A
DKK2	#N/A	#N/A	#N/A				#N/A	#N/A	#N/A
DKK3	#N/A	#N/A	Dkk3				#N/A	#N/A	#N/A
DKK4	#N/A	#N/A	#N/A				#N/A	#N/A	#N/A
DKKL1	#N/A	#N/A	#N/A				Dkkl1	Dkkl1	Dkkl1
DMBT1	Dmbt1	Dmbt1	Dmbt1				#N/A	#N/A	#N/A
DMKN	#N/A	#N/A	#N/A				#N/A	#N/A	#N/A
DMP1	#N/A	#N/A	#N/A				#N/A	#N/A	#N/A
DNASE1	#N/A	#N/A	#N/A				#N/A	#N/A	#N/A
DNASE1L2	Dnase1l2	Dnase1l2	Dnase1l2				#N/A	#N/A	#N/A
DNASE1L3	#N/A	#N/A	#N/A				#N/A	#N/A	#N/A
DPP4	#N/A	#N/A	#N/A				Dpp4	Dpp4	Dpp4
DPT	#N/A	#N/A	#N/A				#N/A	#N/A	#N/A
DRAXIN	#N/A	#N/A	#N/A				#N/A	#N/A	#N/A
DSPP	#N/A	#N/A	#N/A				#N/A	#N/A	#N/A
EBI3	#N/A	#N/A	#N/A				#N/A	#N/A	#N/A
ECM1	#N/A	#N/A	#N/A				#N/A	#N/A	#N/A
ECM2	#N/A	#N/A	#N/A				Ecm2	Ecm2	#N/A
EDDM3A	#N/A	#N/A	#N/A				#N/A	#N/A	#N/A
EDDM3B	#N/A	#N/A	#N/A				#N/A	#N/A	#N/A
EDIL3	#N/A	#N/A	#N/A				#N/A	#N/A	#N/A
EDN1	Edn1	Edn1	Edn1				#N/A	#N/A	#N/A
EDN2	Edn2	Edn2	Edn2				#N/A	#N/A	#N/A
EDN3	#N/A	#N/A	#N/A				Edn3	Edn3	#N/A
EFEMP1	#N/A	#N/A	#N/A				#N/A	#N/A	#N/A
EFEMP2	#N/A	#N/A	#N/A				#N/A	#N/A	#N/A
EFNA1	Efna1	Efna1	Efna1				#N/A	#N/A	#N/A
EFNA4	Efna4	Efna4	Efna4				#N/A	#N/A	#N/A
EGFL6	#N/A	#N/A	#N/A				Egfl6	Egfl6	Egfl6
EGFL7	#N/A	#N/A	#N/A				#N/A	#N/A	#N/A
EGFL8	#N/A	#N/A	#N/A				#N/A	#N/A	#N/A
EGFLAM	#N/A	#N/A	#N/A				#N/A	#N/A	#N/A
EGFR	#N/A	#N/A	#N/A				#N/A	#N/A	#N/A
ELANE	#N/A	#N/A	#N/A				#N/A	#N/A	#N/A
ELN	#N/A	#N/A	#N/A				#N/A	#N/A	#N/A
ELSPBP1	#N/A	#N/A	#N/A				#N/A	#N/A	#N/A
EMC10	#N/A	#N/A	#N/A				#N/A	#N/A	#N/A
EMID1	#N/A	#N/A	#N/A				#N/A	#N/A	#N/A
EMILIN1	#N/A	#N/A	#N/A				#N/A	#N/A	#N/A
EMILIN2	#N/A	#N/A	#N/A				#N/A	#N/A	#N/A
EMILIN3	#N/A	#N/A	#N/A				#N/A	#N/A	#N/A
ENAM	#N/A	#N/A	#N/A				#N/A	#N/A	#N/A
ENDOD1	#N/A	#N/A	#N/A				#N/A	#N/A	#N/A
ENDOU	#N/A	#N/A	#N/A				#N/A	#N/A	#N/A
ENHO	#N/A	#N/A	#N/A				#N/A	#N/A	#N/A
ENPP1	#N/A	#N/A	#N/A				#N/A	#N/A	#N/A
ENPP3	#N/A	#N/A	#N/A				#N/A	#N/A	#N/A
ENTPD5	#N/A	#N/A	#N/A				#N/A	#N/A	#N/A
ENTPD6	#N/A	#N/A	#N/A				#N/A	#N/A	#N/A
EPGN	#N/A	#N/A	#N/A				#N/A	#N/A	#N/A
EPO	#N/A	#N/A	#N/A				#N/A	#N/A	#N/A
EPPIN	#N/A	#N/A	#N/A				#N/A	#N/A	#N/A
EPPIN-WFDC6	#N/A	#N/A	#N/A				#N/A	#N/A	#N/A
EPYC	#N/A	#N/A	#N/A				#N/A	#N/A	#N/A
ERAP1	#N/A	#N/A	#N/A				#N/A	#N/A	#N/A
ERAP2	#N/A	#N/A	#N/A				#N/A	#N/A	#N/A
ERBB3	#N/A	#N/A	#N/A				#N/A	#N/A	#N/A
EREG	#N/A	#N/A	#N/A				#N/A	#N/A	#N/A
ERFE	#N/A	#N/A	#N/A				#N/A	#N/A	#N/A
ERVMER34-1	#N/A	#N/A	#N/A				#N/A	#N/A	#N/A
ESM1	#N/A	#N/A	#N/A				#N/A	#N/A	#N/A
EYS	#N/A	#N/A	#N/A				#N/A	#N/A	#N/A
F10	#N/A	#N/A	#N/A				#N/A	#N/A	#N/A
F11	#N/A	#N/A	#N/A				#N/A	#N/A	#N/A
F12	#N/A	#N/A	#N/A				#N/A	#N/A	#N/A
F13A1	#N/A	#N/A	#N/A				#N/A	#N/A	#N/A
F13B	#N/A	#N/A	#N/A				#N/A	#N/A	#N/A
F2	#N/A	#N/A	#N/A				#N/A	#N/A	#N/A
F3	F3	F3	F3				#N/A	#N/A	#N/A
F5	F5	F5	F5				#N/A	#N/A	#N/A
F7	#N/A	#N/A	#N/A				#N/A	#N/A	#N/A
F8	#N/A	#N/A	#N/A				#N/A	#N/A	#N/A
F9	#N/A	#N/A	#N/A				#N/A	#N/A	#N/A
FAM131A	#N/A	#N/A	#N/A				#N/A	#N/A	#N/A
FAM172A	#N/A	#N/A	#N/A				#N/A	#N/A	#N/A
FAM177A1	#N/A	#N/A	#N/A				#N/A	#N/A	#N/A
FAM180A	#N/A	#N/A	#N/A				#N/A	#N/A	#N/A
FAM198A	#N/A	#N/A	#N/A				#N/A	#N/A	#N/A
FAM19A1	#N/A	#N/A	#N/A				#N/A	#N/A	#N/A
FAM19A3	#N/A	Fam19a3	#N/A				#N/A	#N/A	#N/A
FAM19A4	#N/A	#N/A	#N/A				#N/A	#N/A	#N/A
FAM19A5	#N/A	#N/A	#N/A				Fam19a5	Fam19a5	Fam19a5
FAM20A	#N/A	#N/A	#N/A				#N/A	#N/A	#N/A
FAM20C	#N/A	#N/A	#N/A				#N/A	#N/A	#N/A
FAM24A	#N/A	#N/A	#N/A				#N/A	#N/A	#N/A
FAM3A	#N/A	#N/A	#N/A				#N/A	#N/A	#N/A
FAM3B	Fam3b	Fam3b	Fam3b				#N/A	#N/A	#N/A
FAM3C	Fam3c	Fam3c	Fam3c				#N/A	#N/A	#N/A
FAM3D	#N/A	#N/A	#N/A				#N/A	#N/A	#N/A
FAM46B	#N/A	#N/A	#N/A				#N/A	#N/A	#N/A
FAP	#N/A	#N/A	#N/A				#N/A	#N/A	#N/A
FAS	#N/A	#N/A	#N/A				#N/A	#N/A	#N/A
FASLG	#N/A	#N/A	#N/A				#N/A	#N/A	#N/A
FBLN1	#N/A	#N/A	#N/A				#N/A	#N/A	#N/A
FBLN2	#N/A	#N/A	#N/A				#N/A	#N/A	#N/A
FBLN5	#N/A	#N/A	#N/A				#N/A	#N/A	#N/A
FBLN7	#N/A	#N/A	#N/A				#N/A	#N/A	#N/A
FBN1	#N/A	#N/A	#N/A				#N/A	#N/A	#N/A
FBN2	#N/A	#N/A	#N/A				#N/A	#N/A	#N/A
FBN3	#N/A	#N/A	#N/A				#N/A	#N/A	#N/A
FCER2	#N/A	#N/A	#N/A				#N/A	#N/A	#N/A
FCGR3A	#N/A	#N/A	#N/A				#N/A	#N/A	#N/A
FCGR3B	#N/A	#N/A	#N/A				#N/A	#N/A	#N/A
FCMR	#N/A	#N/A	#N/A				#N/A	#N/A	#N/A
FCN1	#N/A	#N/A	#N/A				#N/A	#N/A	#N/A
FCN2	#N/A	#N/A	#N/A				#N/A	#N/A	#N/A
FCN3	#N/A	#N/A	#N/A				#N/A	#N/A	#N/A
FCRL5	#N/A	#N/A	#N/A				#N/A	#N/A	#N/A
FDCSP	#N/A	#N/A	#N/A				#N/A	#N/A	#N/A
FETUB	Fetub	Fetub	Fetub				#N/A	#N/A	#N/A
FGA	#N/A	#N/A	#N/A				#N/A	#N/A	#N/A
FGB	#N/A	#N/A	#N/A				#N/A	#N/A	#N/A
FGF1	#N/A	#N/A	#N/A				#N/A	#N/A	Fgf1
FGF10	#N/A	#N/A	#N/A				#N/A	Fgf10	#N/A
FGF16	#N/A	#N/A	#N/A				#N/A	#N/A	#N/A
FGF17	#N/A	#N/A	#N/A				#N/A	#N/A	#N/A
FGF18	#N/A	#N/A	#N/A				#N/A	#N/A	#N/A
FGF19	#N/A	#N/A	#N/A				#N/A	#N/A	#N/A
FGF2	#N/A	#N/A	#N/A				#N/A	#N/A	#N/A
FGF20	#N/A	#N/A	#N/A				#N/A	#N/A	#N/A
FGF21	#N/A	#N/A	#N/A				#N/A	#N/A	#N/A
FGF22	#N/A	#N/A	#N/A				#N/A	#N/A	#N/A
FGF23	#N/A	#N/A	#N/A				#N/A	#N/A	#N/A
FGF3	#N/A	#N/A	#N/A				#N/A	#N/A	#N/A
FGF4	#N/A	#N/A	#N/A				#N/A	#N/A	#N/A
FGF5	#N/A	#N/A	#N/A				#N/A	#N/A	#N/A
FGF6	#N/A	#N/A	#N/A				#N/A	#N/A	#N/A
FGF7	#N/A	#N/A	#N/A				#N/A	#N/A	#N/A
FGF8	#N/A	#N/A	#N/A				#N/A	#N/A	#N/A
FGF9	#N/A	#N/A	#N/A				#N/A	#N/A	#N/A
FGFBP1	#N/A	#N/A	#N/A				#N/A	#N/A	#N/A
FGFBP2	#N/A	#N/A	#N/A				#N/A	#N/A	#N/A
FGFBP3	Fgfbp3	Fgfbp3	#N/A				#N/A	#N/A	#N/A
FGFR2	#N/A	#N/A	#N/A				#N/A	#N/A	#N/A
FGG	#N/A	#N/A	#N/A				#N/A	#N/A	#N/A
FGL1	#N/A	#N/A	#N/A				Fgl1	Fgl1	Fgl1
FGL2	#N/A	#N/A	#N/A				#N/A	#N/A	#N/A
FLT1	#N/A	#N/A	#N/A				#N/A	#N/A	#N/A
FLT4	#N/A	#N/A	#N/A				#N/A	#N/A	#N/A
FMOD	#N/A	#N/A	#N/A				#N/A	#N/A	#N/A
FN1	#N/A	#N/A	#N/A				#N/A	#N/A	#N/A
FNDC1	#N/A	#N/A	#N/A				#N/A	#N/A	#N/A
FNDC7	#N/A	#N/A	#N/A				#N/A	#N/A	#N/A
FOLR1	#N/A	#N/A	#N/A				#N/A	Folr1	Folr1
FOLR2	#N/A	#N/A	#N/A				Folr2	Folr2	#N/A
FOLR3	#N/A	#N/A	#N/A				#N/A	#N/A	#N/A
FREM1	#N/A	#N/A	#N/A				#N/A	#N/A	#N/A
FREM3	#N/A	#N/A	#N/A				#N/A	#N/A	#N/A
FRZB	#N/A	#N/A	Frzb				#N/A	#N/A	#N/A
FSHB	#N/A	#N/A	#N/A				#N/A	#N/A	#N/A
FST	#N/A	#N/A	#N/A				Fst	Fst	#N/A
FSTL1	#N/A	#N/A	#N/A				#N/A	#N/A	#N/A
FSTL3	#N/A	#N/A	#N/A				#N/A	#N/A	#N/A
FSTL4	#N/A	Fstl4	#N/A				#N/A	#N/A	#N/A
FSTL5	#N/A	#N/A	#N/A				#N/A	#N/A	#N/A
FTCDNL1	#N/A	#N/A	#N/A				#N/A	#N/A	#N/A
FUCA2	#N/A	#N/A	#N/A				#N/A	#N/A	#N/A
GAL	#N/A	#N/A	#N/A				#N/A	#N/A	#N/A
GALP	#N/A	#N/A	#N/A				#N/A	#N/A	#N/A
GAS6	#N/A	#N/A	#N/A				#N/A	#N/A	#N/A
GAST	#N/A	#N/A	#N/A				#N/A	#N/A	#N/A
GATD1	#N/A	#N/A	#N/A				#N/A	#N/A	#N/A
GC	#N/A	#N/A	#N/A				#N/A	#N/A	#N/A
GCG	#N/A	#N/A	#N/A				#N/A	#N/A	#N/A
GDF1	#N/A	#N/A	#N/A				#N/A	#N/A	#N/A
GDF10	#N/A	#N/A	#N/A				#N/A	#N/A	#N/A
GDF11	#N/A	#N/A	#N/A				#N/A	#N/A	#N/A
GDF15	#N/A	#N/A	#N/A				Gdf15	Gdf15	Gdf15
GDF2	#N/A	#N/A	#N/A				#N/A	#N/A	#N/A
GDF3	#N/A	#N/A	Gdf3				#N/A	#N/A	#N/A
GDF5	#N/A	#N/A	#N/A				#N/A	#N/A	#N/A
GDF6	#N/A	#N/A	#N/A				#N/A	#N/A	#N/A
GDF7	#N/A	#N/A	#N/A				#N/A	Gdf7	Gdf7
GDF9	#N/A	#N/A	#N/A				#N/A	#N/A	#N/A
GDNF	#N/A	#N/A	#N/A				#N/A	#N/A	#N/A
GFOD1	#N/A	#N/A	#N/A				#N/A	#N/A	#N/A
GFOD2	#N/A	#N/A	#N/A				#N/A	#N/A	#N/A
GH1	#N/A	#N/A	#N/A				#N/A	#N/A	#N/A
GH2	#N/A	#N/A	#N/A				#N/A	#N/A	#N/A
GHR	#N/A	#N/A	#N/A				#N/A	#N/A	#N/A
GHRH	#N/A	#N/A	#N/A				#N/A	#N/A	#N/A
GHRL	#N/A	#N/A	#N/A				#N/A	#N/A	#N/A
GIF	#N/A	#N/A	#N/A				#N/A	#N/A	#N/A
GIP	#N/A	#N/A	#N/A				#N/A	#N/A	#N/A
GKN1	#N/A	#N/A	#N/A				#N/A	#N/A	#N/A
GKN2	#N/A	#N/A	#N/A				#N/A	#N/A	#N/A
GLB1L	#N/A	#N/A	#N/A				#N/A	#N/A	#N/A
GLB1L2	#N/A	#N/A	#N/A				#N/A	Glb1l2	Glb1l2
GLDN	#N/A	#N/A	#N/A				#N/A	#N/A	#N/A
GLIPR1L1	#N/A	#N/A	#N/A				#N/A	#N/A	#N/A
GLT1D1	#N/A	#N/A	#N/A				#N/A	#N/A	#N/A
GLTPD2	#N/A	#N/A	#N/A				#N/A	#N/A	#N/A
GNLY	#N/A	#N/A	#N/A				#N/A	#N/A	#N/A
GNRH1	#N/A	#N/A	#N/A				#N/A	#N/A	#N/A
GNRH2	#N/A	#N/A	#N/A				#N/A	#N/A	#N/A
GPHA2	#N/A	#N/A	#N/A				Gpha2	Gpha2	Gpha2
GPHB5	#N/A	#N/A	#N/A				#N/A	#N/A	#N/A
GPI	#N/A	#N/A	#N/A				#N/A	#N/A	#N/A
GPLD1	#N/A	#N/A	#N/A				Gpld1	Gpld1	Gpld1
GPX3	#N/A	#N/A	#N/A				#N/A	#N/A	#N/A
GPX5	#N/A	#N/A	#N/A				#N/A	#N/A	#N/A
GPX6	#N/A	#N/A	#N/A				#N/A	#N/A	#N/A
GPX7	#N/A	#N/A	Gpx7				#N/A	#N/A	#N/A
GREM1	#N/A	#N/A	#N/A				#N/A	#N/A	#N/A
GREM2	#N/A	#N/A	#N/A				Grem2	Grem2	#N/A
GRN	#N/A	#N/A	#N/A				#N/A	#N/A	#N/A
GRP	#N/A	#N/A	#N/A				#N/A	#N/A	#N/A
GSN	#N/A	#N/A	#N/A				#N/A	#N/A	#N/A
GUCA2A	#N/A	Guca2a	Guca2a				#N/A	#N/A	#N/A
GUCA2B	#N/A	#N/A	#N/A				#N/A	#N/A	#N/A
GZMA	#N/A	#N/A	#N/A				#N/A	#N/A	#N/A
GZMB	#N/A	#N/A	#N/A				#N/A	#N/A	#N/A
GZMH	#N/A	#N/A	#N/A				#N/A	#N/A	#N/A
GZMK	#N/A	#N/A	#N/A				#N/A	#N/A	#N/A
GZMM	Gzmm	Gzmm	Gzmm				#N/A	#N/A	#N/A
HABP2	Habp2	Habp2	Habp2				#N/A	#N/A	#N/A
HAMP	#N/A	#N/A	#N/A				#N/A	#N/A	#N/A
HAPLN1	#N/A	#N/A	#N/A				#N/A	#N/A	#N/A
HAPLN2	#N/A	#N/A	#N/A				#N/A	#N/A	#N/A
HAPLN3	#N/A	#N/A	#N/A				#N/A	#N/A	#N/A
HAPLN4	#N/A	#N/A	#N/A				#N/A	#N/A	#N/A
HBEGF	#N/A	#N/A	Hbegf				#N/A	#N/A	#N/A
HCRT	#N/A	#N/A	#N/A				#N/A	#N/A	#N/A
HGF	#N/A	#N/A	#N/A				#N/A	#N/A	#N/A
HGFAC	Hgfac	Hgfac	Hgfac				#N/A	#N/A	#N/A
HHIP	#N/A	#N/A	#N/A				Hhip	Hhip	Hhip
HHIPL1	#N/A	#N/A	#N/A				#N/A	#N/A	#N/A
HHIPL2	#N/A	#N/A	#N/A				#N/A	#N/A	#N/A
HHLA1	#N/A	#N/A	#N/A				#N/A	#N/A	#N/A
HLA-G	#N/A	#N/A	#N/A				#N/A	#N/A	#N/A
HMCN1	#N/A	#N/A	#N/A				#N/A	#N/A	#N/A
HMCN2	#N/A	#N/A	#N/A				#N/A	#N/A	#N/A
HMSD	#N/A	#N/A	#N/A				#N/A	#N/A	#N/A
HP	#N/A	#N/A	Hp				#N/A	#N/A	#N/A
HPR	#N/A	#N/A	#N/A				#N/A	#N/A	#N/A
HPSE	Hpse	Hpse	Hpse				#N/A	#N/A	#N/A
HPSE2	#N/A	#N/A	#N/A				#N/A	#N/A	#N/A
HPX	Hpx	Hpx	Hpx				#N/A	#N/A	#N/A
HRG	#N/A	#N/A	#N/A				#N/A	#N/A	#N/A
HSD11B1L	#N/A	#N/A	#N/A				#N/A	#N/A	#N/A
HSPG2	#N/A	#N/A	#N/A				#N/A	#N/A	#N/A
HTN1	#N/A	#N/A	#N/A				#N/A	#N/A	#N/A
HTN3	#N/A	#N/A	#N/A				#N/A	#N/A	#N/A
HTRA1	#N/A	#N/A	#N/A				#N/A	#N/A	#N/A
HTRA3	#N/A	#N/A	#N/A				#N/A	#N/A	#N/A
HTRA4	#N/A	#N/A	#N/A				Htra4	Htra4	Htra4
HYAL1	#N/A	#N/A	#N/A				#N/A	#N/A	#N/A
HYAL3	#N/A	Hyal3	#N/A				#N/A	#N/A	#N/A
IAPP	#N/A	#N/A	#N/A				#N/A	#N/A	#N/A
IBSP	#N/A	#N/A	Ibsp				#N/A	#N/A	#N/A
IFNA1	#N/A	#N/A	#N/A				#N/A	#N/A	#N/A
IFNA10	#N/A	#N/A	#N/A				#N/A	#N/A	#N/A
IFNA13	#N/A	#N/A	#N/A				#N/A	#N/A	#N/A
IFNA14	#N/A	#N/A	#N/A				#N/A	#N/A	#N/A
IFNA16	#N/A	#N/A	#N/A				#N/A	#N/A	#N/A
IFNA17	#N/A	#N/A	#N/A				#N/A	#N/A	#N/A
IFNA2	#N/A	#N/A	#N/A				#N/A	#N/A	#N/A
IFNA21	#N/A	#N/A	#N/A				#N/A	#N/A	#N/A
IFNA4	#N/A	#N/A	#N/A				#N/A	#N/A	#N/A
IFNA5	#N/A	#N/A	#N/A				#N/A	#N/A	#N/A
IFNA6	#N/A	#N/A	#N/A				#N/A	#N/A	#N/A
IFNA7	#N/A	#N/A	#N/A				#N/A	#N/A	#N/A
IFNA8	#N/A	#N/A	#N/A				#N/A	#N/A	#N/A
IFNAR2	#N/A	#N/A	#N/A				#N/A	#N/A	#N/A
IFNB1	#N/A	#N/A	#N/A				#N/A	#N/A	#N/A
IFNE	#N/A	#N/A	#N/A				#N/A	#N/A	#N/A
IFNG	#N/A	#N/A	#N/A				#N/A	#N/A	#N/A
IFNK	#N/A	#N/A	#N/A				#N/A	#N/A	#N/A
IFNL1	#N/A	#N/A	#N/A				#N/A	#N/A	#N/A
IFNL2	#N/A	#N/A	#N/A				#N/A	#N/A	#N/A
IFNL3	#N/A	#N/A	#N/A				#N/A	#N/A	#N/A
IFNW1	#N/A	#N/A	#N/A				#N/A	#N/A	#N/A
IGF1	#N/A	#N/A	#N/A				#N/A	#N/A	#N/A
IGF2	#N/A	#N/A	#N/A				#N/A	#N/A	#N/A
IGFALS	Igfals	Igfals	Igfals				#N/A	#N/A	#N/A
IGFBP1	#N/A	#N/A	#N/A				#N/A	#N/A	#N/A
IGFBP2	#N/A	#N/A	#N/A				Igfbp2	Igfbp2	#N/A
IGFBP3	#N/A	#N/A	#N/A				#N/A	#N/A	#N/A
IGFBP4	#N/A	#N/A	#N/A				#N/A	#N/A	#N/A
IGFBP5	Igfbp5	Igfbp5	#N/A				#N/A	#N/A	#N/A
IGFBP6	#N/A	#N/A	#N/A				#N/A	#N/A	#N/A
IGFBP7	#N/A	Igfbp7	Igfbp7				#N/A	#N/A	#N/A
IGFBPL1	#N/A	#N/A	#N/A				#N/A	#N/A	#N/A
IGFL1	#N/A	#N/A	#N/A				#N/A	#N/A	#N/A
IGFL2	#N/A	#N/A	#N/A				#N/A	#N/A	#N/A
IGFL3	#N/A	#N/A	#N/A				#N/A	#N/A	#N/A
IGFL4	#N/A	#N/A	#N/A				#N/A	#N/A	#N/A
IGIP	#N/A	#N/A	#N/A				#N/A	#N/A	#N/A
IGLL1	#N/A	#N/A	#N/A				#N/A	#N/A	#N/A
IGLL5	#N/A	#N/A	#N/A				#N/A	#N/A	#N/A
IGLON5	#N/A	#N/A	#N/A				#N/A	#N/A	#N/A
IGSF10	#N/A	#N/A	#N/A				#N/A	#N/A	#N/A
IHH	Ihh	Ihh	Ihh				#N/A	#N/A	#N/A
IL10	#N/A	#N/A	#N/A				#N/A	#N/A	#N/A
IL11	#N/A	#N/A	#N/A				#N/A	#N/A	#N/A
IL12A	#N/A	#N/A	#N/A				#N/A	#N/A	#N/A
IL12B	#N/A	#N/A	#N/A				#N/A	#N/A	#N/A
IL13	#N/A	#N/A	#N/A				#N/A	#N/A	#N/A
IL15	#N/A	#N/A	#N/A				#N/A	#N/A	#N/A
IL15RA	#N/A	#N/A	#N/A				#N/A	#N/A	#N/A
IL16	#N/A	#N/A	#N/A				#N/A	#N/A	#N/A
IL17A	#N/A	#N/A	#N/A				#N/A	#N/A	#N/A
IL17B	#N/A	#N/A	#N/A				#N/A	#N/A	#N/A
IL17C	#N/A	#N/A	#N/A				#N/A	#N/A	#N/A
IL17D	#N/A	#N/A	#N/A				#N/A	#N/A	#N/A
IL17F	#N/A	#N/A	#N/A				#N/A	#N/A	#N/A
IL17RA	#N/A	#N/A	#N/A				#N/A	#N/A	#N/A
IL18	#N/A	#N/A	#N/A				#N/A	#N/A	#N/A
IL18BP	#N/A	#N/A	#N/A				#N/A	#N/A	#N/A
IL19	#N/A	#N/A	#N/A				#N/A	#N/A	#N/A
IL1A	#N/A	Il1a	Il1a				#N/A	#N/A	#N/A
IL1B	Il1b	Il1b	Il1b				#N/A	#N/A	#N/A
IL1F10	#N/A	#N/A	#N/A				#N/A	#N/A	#N/A
IL1R1	#N/A	#N/A	#N/A				#N/A	#N/A	#N/A
IL1R2	#N/A	#N/A	#N/A				#N/A	#N/A	#N/A
IL1RAP	#N/A	#N/A	#N/A				#N/A	Il1rap	#N/A
IL1RL1	#N/A	#N/A	#N/A				Il1rl1	#N/A	#N/A
IL1RN	Il1rn	Il1rn	Il1rn				#N/A	#N/A	#N/A
IL2	#N/A	#N/A	#N/A				#N/A	#N/A	#N/A
IL20	#N/A	#N/A	#N/A				#N/A	#N/A	#N/A
IL21	#N/A	#N/A	#N/A				#N/A	#N/A	#N/A
IL22	#N/A	#N/A	#N/A				#N/A	#N/A	#N/A
IL22RA2	#N/A	#N/A	#N/A				#N/A	#N/A	#N/A
IL23A	#N/A	#N/A	#N/A				#N/A	#N/A	#N/A
IL24	#N/A	#N/A	#N/A				#N/A	#N/A	#N/A
IL25	#N/A	#N/A	#N/A				#N/A	#N/A	#N/A
IL26	#N/A	#N/A	#N/A				#N/A	#N/A	#N/A
IL27	#N/A	#N/A	#N/A				#N/A	#N/A	#N/A
IL3	#N/A	#N/A	#N/A				#N/A	#N/A	#N/A
IL31	#N/A	#N/A	#N/A				#N/A	#N/A	#N/A
IL32	#N/A	#N/A	#N/A				#N/A	#N/A	#N/A
IL33	#N/A	Il33	Il33				#N/A	#N/A	#N/A
IL34	#N/A	#N/A	Il34				#N/A	#N/A	#N/A
IL36A	#N/A	#N/A	#N/A				#N/A	#N/A	#N/A
IL36B	#N/A	#N/A	#N/A				#N/A	#N/A	#N/A
IL36G	#N/A	#N/A	#N/A				#N/A	#N/A	#N/A
IL36RN	#N/A	#N/A	#N/A				#N/A	#N/A	#N/A
IL37	#N/A	#N/A	#N/A				#N/A	#N/A	#N/A
IL4	#N/A	#N/A	#N/A				#N/A	#N/A	#N/A
IL4I1	#N/A	#N/A	#N/A				#N/A	#N/A	#N/A
IL4R	#N/A	#N/A	#N/A				#N/A	#N/A	#N/A
IL5	#N/A	#N/A	#N/A				#N/A	#N/A	#N/A
IL6	#N/A	#N/A	#N/A				#N/A	#N/A	#N/A
IL6ST	#N/A	#N/A	#N/A				#N/A	#N/A	#N/A
IL7	#N/A	Il7	Il7				#N/A	#N/A	#N/A
IL9	#N/A	#N/A	#N/A				#N/A	#N/A	#N/A
IMPG1	#N/A	#N/A	#N/A				#N/A	#N/A	#N/A
INHA	Inha	Inha	Inha				#N/A	#N/A	#N/A
INHBA	#N/A	#N/A	#N/A				#N/A	#N/A	#N/A
INHBB	#N/A	Inhbb	Inhbb				#N/A	#N/A	#N/A
INHBC	#N/A	#N/A	#N/A				#N/A	#N/A	#N/A
INHBE	#N/A	#N/A	#N/A				#N/A	#N/A	#N/A
INS	#N/A	#N/A	#N/A				#N/A	#N/A	#N/A
INS-IGF2	#N/A	#N/A	#N/A				#N/A	#N/A	#N/A
INSL3	#N/A	#N/A	#N/A				#N/A	#N/A	#N/A
INSL4	#N/A	#N/A	#N/A				#N/A	#N/A	#N/A
INSL5	#N/A	#N/A	#N/A				#N/A	#N/A	#N/A
INSL6	Insl6	#N/A	Insl6				#N/A	#N/A	#N/A
ISG15	Isg15	Isg15	Isg15				#N/A	#N/A	#N/A
ISLR	#N/A	#N/A	#N/A				#N/A	#N/A	#N/A
ISM1	#N/A	#N/A	#N/A				Ism1	Ism1	#N/A
ISM2	#N/A	#N/A	#N/A				Ism2	#N/A	Ism2
ITGBL1	#N/A	#N/A	#N/A				#N/A	#N/A	#N/A
ITIH1	#N/A	#N/A	#N/A				#N/A	#N/A	#N/A
ITIH2	#N/A	#N/A	#N/A				#N/A	#N/A	#N/A
ITIH3	#N/A	#N/A	#N/A				#N/A	#N/A	#N/A
ITIH4	#N/A	#N/A	#N/A				#N/A	#N/A	#N/A
ITIH5	#N/A	#N/A	#N/A				Itih5	Itih5	Itih5
ITIH6	#N/A	#N/A	#N/A				#N/A	#N/A	#N/A
ITLN1	#N/A	#N/A	#N/A				Itln1	Itln1	#N/A
ITLN2	#N/A	#N/A	#N/A				#N/A	#N/A	#N/A
IZUMO4	#N/A	#N/A	#N/A				#N/A	#N/A	#N/A
JAM3	#N/A	#N/A	#N/A				#N/A	#N/A	#N/A
JCHAIN	#N/A	#N/A	#N/A				#N/A	#N/A	#N/A
KAZALD1	#N/A	#N/A	#N/A				#N/A	#N/A	#N/A
KCP	#N/A	#N/A	#N/A				#N/A	#N/A	#N/A
KERA	#N/A	#N/A	#N/A				#N/A	#N/A	#N/A
KIAA0100	#N/A	#N/A	#N/A				#N/A	#N/A	#N/A
KIAA0319	#N/A	#N/A	#N/A				#N/A	#N/A	#N/A
KIR3DX1	#N/A	#N/A	#N/A				#N/A	#N/A	#N/A
KISS1	#N/A	#N/A	#N/A				#N/A	#N/A	#N/A
KL	#N/A	#N/A	#N/A				#N/A	#N/A	#N/A
KLK1	#N/A	#N/A	Klk1				#N/A	#N/A	#N/A
KLK10	#N/A	#N/A	#N/A				#N/A	#N/A	#N/A
KLK11	#N/A	#N/A	#N/A				#N/A	#N/A	#N/A
KLK12	#N/A	#N/A	#N/A				#N/A	#N/A	#N/A
KLK13	#N/A	#N/A	#N/A				#N/A	#N/A	#N/A
KLK14	#N/A	#N/A	#N/A				#N/A	#N/A	#N/A
KLK15	#N/A	#N/A	#N/A				#N/A	#N/A	#N/A
KLK2	#N/A	#N/A	#N/A				#N/A	#N/A	#N/A
KLK3	#N/A	#N/A	#N/A				#N/A	#N/A	#N/A
KLK4	#N/A	#N/A	#N/A				#N/A	#N/A	#N/A
KLK5	#N/A	#N/A	#N/A				#N/A	#N/A	#N/A
KLK6	#N/A	#N/A	#N/A				#N/A	#N/A	#N/A
KLK7	#N/A	#N/A	#N/A				#N/A	#N/A	#N/A
KLK8	#N/A	#N/A	#N/A				#N/A	#N/A	#N/A
KLK9	#N/A	#N/A	#N/A				#N/A	#N/A	#N/A
KLKB1	#N/A	#N/A	#N/A				#N/A	#N/A	#N/A
KNG1	#N/A	#N/A	#N/A				#N/A	#N/A	#N/A
KRTDAP	#N/A	#N/A	#N/A				#N/A	#N/A	#N/A
LACRT	#N/A	#N/A	#N/A				#N/A	#N/A	#N/A
LAD1	#N/A	Lad1	Lad1				#N/A	#N/A	#N/A
LAG3	#N/A	Lag3	Lag3				#N/A	#N/A	#N/A
LAIR2	#N/A	#N/A	#N/A				#N/A	#N/A	#N/A
LALBA	#N/A	#N/A	#N/A				#N/A	#N/A	#N/A
LAMA1	#N/A	#N/A	#N/A				#N/A	#N/A	#N/A
LAMA2	#N/A	#N/A	#N/A				Lama2	Lama2	#N/A
LAMA3	#N/A	#N/A	#N/A				Lama3	#N/A	#N/A
LAMA4	#N/A	#N/A	#N/A				#N/A	#N/A	#N/A
LAMA5	Lama5	Lama5	Lama5				#N/A	#N/A	#N/A
LAMB1	#N/A	#N/A	#N/A				#N/A	#N/A	#N/A
LAMB2	#N/A	#N/A	#N/A				#N/A	#N/A	#N/A
LAMB3	#N/A	Lamb3	Lamb3				#N/A	#N/A	#N/A
LAMB4	#N/A	#N/A	#N/A				#N/A	#N/A	#N/A
LAMC1	#N/A	#N/A	#N/A				#N/A	#N/A	#N/A
LAMC2	#N/A	Lamc2	Lamc2				#N/A	#N/A	#N/A
LAMC3	#N/A	#N/A	#N/A				Lamc3	Lamc3	Lamc3
LBP	Lbp	Lbp	Lbp				#N/A	#N/A	#N/A
LCAT	#N/A	#N/A	#N/A				#N/A	Lcat	#N/A
LCN1	#N/A	#N/A	#N/A				#N/A	#N/A	#N/A
LCN10	#N/A	#N/A	#N/A				#N/A	#N/A	#N/A
LCN12	#N/A	#N/A	#N/A				#N/A	#N/A	#N/A
LCN15	#N/A	#N/A	#N/A				#N/A	#N/A	#N/A
LCN2	Lcn2	Lcn2	Lcn2				#N/A	#N/A	#N/A
LCN6	#N/A	#N/A	#N/A				#N/A	#N/A	#N/A
LCN8	#N/A	#N/A	#N/A				#N/A	#N/A	#N/A
LCN9	#N/A	#N/A	#N/A				#N/A	#N/A	#N/A
LDLRAD2	#N/A	#N/A	#N/A				#N/A	#N/A	#N/A
LEAP2	#N/A	#N/A	#N/A				#N/A	#N/A	#N/A
LECT2	#N/A	#N/A	#N/A				#N/A	#N/A	#N/A
LEFTY1	#N/A	Lefty1	Lefty1				#N/A	#N/A	#N/A
LEFTY2	#N/A	#N/A	#N/A				#N/A	#N/A	#N/A
LEP	#N/A	#N/A	#N/A				#N/A	#N/A	Lep
LEPR	#N/A	#N/A	#N/A				#N/A	#N/A	#N/A
LGALS1	#N/A	#N/A	#N/A				#N/A	#N/A	#N/A
LGALS3	Lgals3	Lgals3	Lgals3				#N/A	#N/A	#N/A
LGALS3BP	Lgals3bp	Lgals3bp	Lgals3bp				#N/A	#N/A	#N/A
LGALS9	Lgals9	Lgals9	Lgals9				#N/A	#N/A	#N/A
LGI1	#N/A	#N/A	#N/A				Lgi1	Lgi1	Lgi1
LGI2	#N/A	#N/A	#N/A				Lgi2	#N/A	#N/A
LGI3	#N/A	#N/A	#N/A				Lgi3	Lgi3	Lgi3
LGI4	#N/A	#N/A	#N/A				#N/A	#N/A	#N/A
LHB	#N/A	#N/A	#N/A				#N/A	#N/A	#N/A
LIF	Lif	Lif	Lif				#N/A	#N/A	#N/A
LILRA2	#N/A	#N/A	#N/A				#N/A	#N/A	#N/A
LILRA5	#N/A	#N/A	#N/A				#N/A	#N/A	#N/A
LIPC	#N/A	#N/A	#N/A				#N/A	Lipc	Lipc
LIPF	#N/A	#N/A	#N/A				#N/A	#N/A	#N/A
LIPG	#N/A	#N/A	Lipg				#N/A	#N/A	#N/A
LIPH	Liph	#N/A	#N/A				#N/A	#N/A	#N/A
LIPI	#N/A	#N/A	#N/A				#N/A	#N/A	#N/A
LIPK	#N/A	#N/A	#N/A				#N/A	#N/A	#N/A
LIPM	#N/A	#N/A	#N/A				#N/A	#N/A	#N/A
LIPN	#N/A	#N/A	#N/A				#N/A	#N/A	#N/A
LOX	#N/A	#N/A	#N/A				#N/A	#N/A	#N/A
LOXL1	#N/A	#N/A	#N/A				#N/A	#N/A	#N/A
LOXL2	#N/A	#N/A	#N/A				#N/A	#N/A	#N/A
LOXL3	#N/A	#N/A	#N/A				#N/A	#N/A	#N/A
LOXL4	#N/A	#N/A	#N/A				#N/A	#N/A	#N/A
LPA	#N/A	#N/A	#N/A				#N/A	#N/A	#N/A
LPL	#N/A	#N/A	#N/A				Lpl	#N/A	#N/A
LPO	#N/A	#N/A	#N/A				#N/A	#N/A	#N/A
LRCH3	#N/A	#N/A	#N/A				#N/A	#N/A	#N/A
LRCOL1	Lrcol1	#N/A	#N/A				#N/A	#N/A	#N/A
LRG1	Lrg1	Lrg1	Lrg1				#N/A	#N/A	#N/A
LRP8	#N/A	Lrp8	Lrp8				#N/A	#N/A	#N/A
LRRC17	#N/A	#N/A	#N/A				#N/A	#N/A	#N/A
LTA	#N/A	#N/A	#N/A				#N/A	#N/A	#N/A
LTBP1	#N/A	Ltbp1	Ltbp1				#N/A	#N/A	#N/A
LTBP2	Ltbp2	Ltbp2	Ltbp2				#N/A	#N/A	#N/A
LTBP3	#N/A	#N/A	#N/A				#N/A	#N/A	#N/A
LTBP4	#N/A	#N/A	#N/A				#N/A	#N/A	#N/A
LTF	Ltf	Ltf	Ltf				#N/A	#N/A	#N/A
LUM	#N/A	#N/A	#N/A				#N/A	#N/A	#N/A
LUZP2	#N/A	#N/A	#N/A				#N/A	#N/A	#N/A
LY6G5B	#N/A	#N/A	#N/A				#N/A	#N/A	#N/A
LY6G5C	#N/A	#N/A	#N/A				#N/A	#N/A	#N/A
LY6K	Ly6k	Ly6k	Ly6k				#N/A	#N/A	#N/A
LY86	#N/A	Ly86	Ly86				#N/A	#N/A	#N/A
LY96	#N/A	#N/A	#N/A				#N/A	#N/A	#N/A
LYG1	#N/A	#N/A	#N/A				#N/A	#N/A	#N/A
LYG2	#N/A	#N/A	#N/A				#N/A	#N/A	#N/A
LYPD6	#N/A	#N/A	#N/A				Lypd6	Lypd6	Lypd6
LYPD8	Lypd8	Lypd8	Lypd8				#N/A	#N/A	#N/A
LYZ	#N/A	#N/A	#N/A				#N/A	#N/A	#N/A
LYZL1	#N/A	#N/A	#N/A				#N/A	#N/A	#N/A
LYZL2	#N/A	#N/A	#N/A				#N/A	#N/A	#N/A
LYZL4	Lyzl4	#N/A	#N/A				#N/A	#N/A	#N/A
LYZL6	#N/A	#N/A	#N/A				#N/A	#N/A	#N/A
MAMDC2	#N/A	#N/A	#N/A				#N/A	#N/A	#N/A
MAN2B2	Man2b2	Man2b2	Man2b2				#N/A	#N/A	#N/A
MANF	#N/A	#N/A	#N/A				#N/A	Manf	Manf
MASP1	#N/A	#N/A	#N/A				#N/A	#N/A	#N/A
MASP2	#N/A	#N/A	#N/A				#N/A	#N/A	#N/A
MATN1	#N/A	#N/A	#N/A				#N/A	#N/A	#N/A
MATN2	#N/A	#N/A	#N/A				#N/A	#N/A	#N/A
MATN3	#N/A	#N/A	#N/A				#N/A	#N/A	#N/A
MATN4	#N/A	#N/A	#N/A				#N/A	#N/A	#N/A
MBL2	#N/A	#N/A	#N/A				#N/A	#N/A	#N/A
MDK	#N/A	#N/A	Mdk				#N/A	#N/A	#N/A
MEGF6	#N/A	#N/A	#N/A				#N/A	#N/A	#N/A
MEI1	Mei1	#N/A	#N/A				#N/A	#N/A	#N/A
MEP1B	#N/A	#N/A	#N/A				#N/A	#N/A	#N/A
MEPE	#N/A	#N/A	#N/A				#N/A	#N/A	#N/A
MET	#N/A	#N/A	#N/A				#N/A	#N/A	#N/A
METRN	#N/A	#N/A	#N/A				#N/A	#N/A	#N/A
METRNL	Metrnl	Metrnl	#N/A				#N/A	#N/A	#N/A
METTL24	#N/A	#N/A	#N/A				#N/A	#N/A	#N/A
METTL9	#N/A	#N/A	#N/A				#N/A	#N/A	#N/A
MFAP2	#N/A	#N/A	#N/A				#N/A	#N/A	#N/A
MFAP4	#N/A	#N/A	#N/A				#N/A	#N/A	#N/A
MFAP5	#N/A	#N/A	#N/A				#N/A	#N/A	#N/A
MFGE8	#N/A	Mfge8	Mfge8				#N/A	#N/A	#N/A
MGAT4A	Mgat4a	Mgat4a	Mgat4a				#N/A	#N/A	#N/A
MGP	#N/A	#N/A	#N/A				#N/A	#N/A	#N/A
MIA	Mia	Mia	Mia				#N/A	#N/A	#N/A
MIF	Mif	Mif	Mif				#N/A	#N/A	#N/A
MLN	#N/A	#N/A	#N/A				#N/A	#N/A	#N/A
MMP1	#N/A	#N/A	#N/A				#N/A	#N/A	#N/A
MMP10	#N/A	#N/A	#N/A				#N/A	#N/A	#N/A
MMP11	Mmp11	Mmp11	Mmp11				#N/A	#N/A	#N/A
MMP12	#N/A	#N/A	#N/A				#N/A	#N/A	#N/A
MMP13	#N/A	#N/A	#N/A				#N/A	#N/A	#N/A
MMP16	Mmp16	#N/A	#N/A				#N/A	#N/A	#N/A
MMP17	#N/A	#N/A	#N/A				Mmp17	Mmp17	Mmp17
MMP19	#N/A	#N/A	#N/A				#N/A	#N/A	#N/A
MMP2	#N/A	#N/A	#N/A				#N/A	#N/A	#N/A
MMP20	#N/A	#N/A	#N/A				#N/A	#N/A	#N/A
MMP21	#N/A	#N/A	#N/A				#N/A	#N/A	#N/A
MMP24	#N/A	#N/A	#N/A				#N/A	#N/A	#N/A
MMP25	#N/A	#N/A	#N/A				#N/A	#N/A	#N/A
MMP26	#N/A	#N/A	#N/A				#N/A	#N/A	#N/A
MMP28	#N/A	#N/A	Mmp28				#N/A	#N/A	#N/A
MMP3	Mmp3	Mmp3	Mmp3				#N/A	#N/A	#N/A
MMP7	Mmp7	Mmp7	Mmp7				#N/A	#N/A	#N/A
MMP8	#N/A	#N/A	#N/A				#N/A	#N/A	#N/A
MMP9	#N/A	#N/A	#N/A				#N/A	#N/A	#N/A
MMRN1	#N/A	#N/A	#N/A				Mmrn1	Mmrn1	Mmrn1
MMRN2	#N/A	#N/A	#N/A				#N/A	#N/A	#N/A
MSMB	Msmb	#N/A	#N/A				#N/A	#N/A	#N/A
MSMP	#N/A	#N/A	#N/A				#N/A	#N/A	#N/A
MST1	#N/A	#N/A	#N/A				#N/A	#N/A	#N/A
MSTN	#N/A	#N/A	#N/A				#N/A	#N/A	#N/A
MTRNR2L1	#N/A	#N/A	#N/A				#N/A	#N/A	#N/A
MTRNR2L10	#N/A	#N/A	#N/A				#N/A	#N/A	#N/A
MTRNR2L11	#N/A	#N/A	#N/A				#N/A	#N/A	#N/A
MTRNR2L12	#N/A	#N/A	#N/A				#N/A	#N/A	#N/A
MTRNR2L13	#N/A	#N/A	#N/A				#N/A	#N/A	#N/A
MTRNR2L3	#N/A	#N/A	#N/A				#N/A	#N/A	#N/A
MTRNR2L4	#N/A	#N/A	#N/A				#N/A	#N/A	#N/A
MTRNR2L5	#N/A	#N/A	#N/A				#N/A	#N/A	#N/A
MTRNR2L6	#N/A	#N/A	#N/A				#N/A	#N/A	#N/A
MTRNR2L7	#N/A	#N/A	#N/A				#N/A	#N/A	#N/A
MTRNR2L8	#N/A	#N/A	#N/A				#N/A	#N/A	#N/A
MUC1	Muc1	Muc1	Muc1				#N/A	#N/A	#N/A
MUC13	#N/A	Muc13	Muc13				#N/A	#N/A	#N/A
MUC16	#N/A	#N/A	#N/A				#N/A	#N/A	#N/A
MUC20	#N/A	#N/A	#N/A				#N/A	#N/A	#N/A
MUC4	#N/A	Muc4	Muc4				#N/A	#N/A	#N/A
MUC5AC	#N/A	#N/A	#N/A				#N/A	#N/A	#N/A
MUC5B	#N/A	Muc5b	Muc5b				#N/A	#N/A	#N/A
MUC6	#N/A	#N/A	#N/A				#N/A	#N/A	#N/A
MUC7	#N/A	#N/A	#N/A				#N/A	#N/A	#N/A
MUCL1	#N/A	#N/A	#N/A				#N/A	#N/A	#N/A
MXRA5	#N/A	#N/A	#N/A				#N/A	#N/A	#N/A
MXRA7	#N/A	#N/A	#N/A				#N/A	#N/A	#N/A
MYDGF	#N/A	#N/A	#N/A				#N/A	#N/A	#N/A
MYOC	#N/A	#N/A	#N/A				Myoc	Myoc	Myoc
MZB1	#N/A	#N/A	#N/A				#N/A	#N/A	#N/A
NAMPT	#N/A	#N/A	#N/A				#N/A	#N/A	#N/A
NAPSA	#N/A	#N/A	Napsa				#N/A	#N/A	#N/A
NAXE	#N/A	#N/A	#N/A				#N/A	#N/A	#N/A
NBL1	#N/A	#N/A	#N/A				#N/A	#N/A	#N/A
NCAN	#N/A	#N/A	#N/A				#N/A	#N/A	#N/A
NDNF	#N/A	Ndnf	Ndnf				#N/A	#N/A	#N/A
NDP	#N/A	#N/A	#N/A				#N/A	#N/A	#N/A
NECTIN1	#N/A	#N/A	#N/A				#N/A	#N/A	#N/A
NECTIN4	#N/A	#N/A	#N/A				#N/A	#N/A	#N/A
NELL1	#N/A	#N/A	#N/A				#N/A	#N/A	#N/A
NELL2	#N/A	#N/A	#N/A				Nell2	#N/A	#N/A
NENF	#N/A	#N/A	#N/A				#N/A	#N/A	#N/A
NGF	#N/A	#N/A	#N/A				Ngf	Ngf	#N/A
NHLRC3	#N/A	#N/A	#N/A				#N/A	#N/A	#N/A
NID1	#N/A	#N/A	#N/A				#N/A	#N/A	#N/A
NID2	#N/A	#N/A	#N/A				#N/A	#N/A	#N/A
NMB	#N/A	#N/A	#N/A				#N/A	#N/A	#N/A
NMS	#N/A	#N/A	#N/A				#N/A	#N/A	#N/A
NMU	#N/A	#N/A	#N/A				#N/A	#N/A	#N/A
NODAL	#N/A	#N/A	#N/A				#N/A	#N/A	#N/A
NOG	#N/A	#N/A	#N/A				#N/A	#N/A	#N/A
NOTCH2NL	#N/A	#N/A	#N/A				#N/A	#N/A	#N/A
NOTUM	#N/A	#N/A	#N/A				#N/A	#N/A	#N/A
NOV	#N/A	#N/A	#N/A				#N/A	#N/A	#N/A
NPB	Npb	#N/A	#N/A				#N/A	#N/A	#N/A
NPC2	#N/A	#N/A	#N/A				#N/A	#N/A	#N/A
NPFF	#N/A	#N/A	#N/A				#N/A	#N/A	#N/A
NPNT	Npnt	Npnt	Npnt				#N/A	#N/A	#N/A
NPPA	#N/A	#N/A	#N/A				#N/A	#N/A	#N/A
NPPB	#N/A	#N/A	#N/A				#N/A	#N/A	#N/A
NPPC	#N/A	#N/A	#N/A				#N/A	#N/A	#N/A
NPS	#N/A	#N/A	#N/A				#N/A	#N/A	#N/A
NPTX1	#N/A	#N/A	#N/A				#N/A	#N/A	#N/A
NPTX2	#N/A	#N/A	#N/A				Nptx2	Nptx2	Nptx2
NPVF	#N/A	#N/A	#N/A				#N/A	#N/A	#N/A
NPW	#N/A	#N/A	#N/A				#N/A	#N/A	#N/A
NPY	#N/A	#N/A	#N/A				#N/A	#N/A	#N/A
NRG1	#N/A	#N/A	#N/A				#N/A	Nrg1	#N/A
NRG2	#N/A	#N/A	#N/A				#N/A	Nrg2	#N/A
NRG3	#N/A	#N/A	#N/A				#N/A	#N/A	#N/A
NRG4	#N/A	#N/A	#N/A				#N/A	#N/A	#N/A
NRN1L	#N/A	#N/A	#N/A				#N/A	#N/A	#N/A
NRP1	#N/A	#N/A	#N/A				#N/A	#N/A	#N/A
NRP2	#N/A	#N/A	#N/A				#N/A	Nrp2	#N/A
NRTN	#N/A	#N/A	#N/A				#N/A	#N/A	#N/A
NT5DC3	#N/A	#N/A	#N/A				#N/A	#N/A	#N/A
NTF3	#N/A	#N/A	#N/A				#N/A	#N/A	#N/A
NTF4	#N/A	#N/A	#N/A				#N/A	#N/A	#N/A
NTN1	#N/A	#N/A	#N/A				Ntn1	Ntn1	#N/A
NTN3	#N/A	#N/A	#N/A				#N/A	#N/A	#N/A
NTN4	#N/A	#N/A	#N/A				#N/A	#N/A	#N/A
NTN5	#N/A	#N/A	#N/A				#N/A	#N/A	#N/A
NTS	#N/A	#N/A	#N/A				#N/A	#N/A	#N/A
NUCB1	#N/A	#N/A	#N/A				#N/A	#N/A	#N/A
NUCB2	Nucb2	Nucb2	Nucb2				#N/A	#N/A	#N/A
NXPE3	#N/A	#N/A	#N/A				Nxpe3	Nxpe3	Nxpe3
NXPE4	#N/A	#N/A	#N/A				#N/A	#N/A	#N/A
NXPH1	#N/A	#N/A	#N/A				#N/A	#N/A	#N/A
NXPH2	#N/A	#N/A	#N/A				#N/A	#N/A	#N/A
NXPH3	#N/A	#N/A	#N/A				#N/A	#N/A	#N/A
NXPH4	#N/A	#N/A	#N/A				#N/A	#N/A	#N/A
OAF	Oaf	Oaf	Oaf				#N/A	#N/A	#N/A
OBP2A	#N/A	#N/A	#N/A				#N/A	#N/A	#N/A
OBP2B	#N/A	#N/A	#N/A				#N/A	#N/A	#N/A
OC90	#N/A	#N/A	#N/A				#N/A	#N/A	#N/A
ODAPH	#N/A	#N/A	#N/A				#N/A	#N/A	#N/A
OGN	#N/A	#N/A	#N/A				Ogn	Ogn	Ogn
OIT3	#N/A	#N/A	#N/A				#N/A	#N/A	#N/A
OLFM1	#N/A	#N/A	#N/A				Olfm1	Olfm1	#N/A
OLFM2	#N/A	#N/A	#N/A				#N/A	#N/A	#N/A
OLFM3	#N/A	#N/A	#N/A				#N/A	#N/A	#N/A
OLFM4	#N/A	#N/A	#N/A				#N/A	#N/A	#N/A
OLFML1	#N/A	#N/A	#N/A				#N/A	#N/A	#N/A
OLFML2A	#N/A	#N/A	#N/A				#N/A	#N/A	#N/A
OLFML2B	#N/A	#N/A	#N/A				#N/A	#N/A	#N/A
OLFML3	#N/A	#N/A	#N/A				#N/A	#N/A	#N/A
OMD	#N/A	#N/A	#N/A				#N/A	#N/A	#N/A
OOSP2	#N/A	#N/A	#N/A				#N/A	#N/A	#N/A
OPRPN	#N/A	#N/A	#N/A				#N/A	#N/A	#N/A
OPTC	#N/A	#N/A	#N/A				Optc	Optc	Optc
ORM1	#N/A	#N/A	#N/A				#N/A	#N/A	#N/A
ORM2	#N/A	#N/A	#N/A				#N/A	#N/A	#N/A
OSM	#N/A	Osm	Osm				#N/A	#N/A	#N/A
OSTN	#N/A	#N/A	#N/A				#N/A	#N/A	#N/A
OTOA	#N/A	#N/A	#N/A				#N/A	#N/A	#N/A
OTOG	#N/A	#N/A	#N/A				#N/A	#N/A	#N/A
OTOL1	#N/A	#N/A	#N/A				#N/A	#N/A	#N/A
OTOR	#N/A	#N/A	#N/A				#N/A	#N/A	#N/A
OTOS	Otos	Otos	#N/A				#N/A	#N/A	#N/A
OVCH1	#N/A	#N/A	#N/A				#N/A	#N/A	#N/A
OVCH2	#N/A	#N/A	#N/A				#N/A	#N/A	#N/A
OXT	#N/A	#N/A	#N/A				#N/A	#N/A	#N/A
P4HB	#N/A	#N/A	#N/A				#N/A	#N/A	#N/A
PAEP	#N/A	#N/A	#N/A				#N/A	#N/A	#N/A
PAM	#N/A	Pam	#N/A				#N/A	#N/A	#N/A
PAMR1	Pamr1	Pamr1	Pamr1				#N/A	#N/A	#N/A
PAPLN	#N/A	#N/A	#N/A				#N/A	#N/A	#N/A
PAPPA	#N/A	#N/A	#N/A				Pappa	Pappa	#N/A
PAPPA2	#N/A	#N/A	#N/A				Pappa2	Pappa2	Pappa2
PATE1	#N/A	#N/A	#N/A				#N/A	#N/A	#N/A
PATE2	#N/A	#N/A	#N/A				#N/A	#N/A	#N/A
PATE3	#N/A	#N/A	#N/A				#N/A	#N/A	#N/A
PATE4	#N/A	#N/A	#N/A				#N/A	#N/A	#N/A
PCDH12	#N/A	#N/A	#N/A				#N/A	#N/A	#N/A
PCDHA1	#N/A	#N/A	#N/A				#N/A	#N/A	#N/A
PCDHA10	#N/A	#N/A	#N/A				#N/A	#N/A	#N/A
PCOLCE	#N/A	#N/A	#N/A				#N/A	#N/A	#N/A
PCOLCE2	#N/A	#N/A	#N/A				Pcolce2	Pcolce2	Pcolce2
PCSK1	Pcsk1	Pcsk1	Pcsk1				#N/A	#N/A	#N/A
PCSK1N	#N/A	#N/A	#N/A				#N/A	#N/A	#N/A
PCSK2	#N/A	#N/A	#N/A				#N/A	#N/A	#N/A
PCSK5	#N/A	#N/A	#N/A				#N/A	#N/A	#N/A
PCSK6	#N/A	#N/A	#N/A				#N/A	#N/A	#N/A
PCSK9	#N/A	Pcsk9	Pcsk9				#N/A	#N/A	#N/A
PCYOX1L	Pcyox1l	Pcyox1l	Pcyox1l				#N/A	#N/A	#N/A
PDCD1LG2	#N/A	#N/A	#N/A				#N/A	#N/A	#N/A
PDGFA	#N/A	#N/A	#N/A				#N/A	#N/A	#N/A
PDGFB	#N/A	Pdgfb	Pdgfb				#N/A	#N/A	#N/A
PDGFC	#N/A	#N/A	#N/A				#N/A	#N/A	#N/A
PDGFD	#N/A	#N/A	#N/A				#N/A	#N/A	#N/A
PDGFRL	#N/A	#N/A	#N/A				#N/A	#N/A	#N/A
PDYN	#N/A	#N/A	#N/A				#N/A	#N/A	#N/A
PEBP4	#N/A	#N/A	#N/A				#N/A	#N/A	#N/A
PENK	#N/A	#N/A	#N/A				#N/A	#N/A	#N/A
PF4	#N/A	#N/A	#N/A				#N/A	#N/A	#N/A
PF4V1	#N/A	#N/A	#N/A				#N/A	#N/A	#N/A
PGA3	#N/A	#N/A	#N/A				#N/A	#N/A	#N/A
PGA4	#N/A	#N/A	#N/A				#N/A	#N/A	#N/A
PGA5	#N/A	#N/A	#N/A				#N/A	#N/A	#N/A
PGC	#N/A	#N/A	#N/A				#N/A	#N/A	#N/A
PGF	#N/A	#N/A	#N/A				#N/A	#N/A	#N/A
PGLYRP1	Pglyrp1	Pglyrp1	Pglyrp1				#N/A	#N/A	#N/A
PGLYRP2	#N/A	#N/A	#N/A				#N/A	#N/A	#N/A
PGLYRP3	#N/A	#N/A	#N/A				#N/A	#N/A	#N/A
PGLYRP4	#N/A	#N/A	Pglyrp4				#N/A	#N/A	#N/A
PI15	#N/A	#N/A	#N/A				#N/A	#N/A	#N/A
PI16	#N/A	#N/A	#N/A				#N/A	#N/A	#N/A
PI3	#N/A	#N/A	#N/A				#N/A	#N/A	#N/A
PIBF1	#N/A	#N/A	#N/A				#N/A	#N/A	#N/A
PILRA	#N/A	#N/A	#N/A				#N/A	#N/A	#N/A
PINLYP	#N/A	#N/A	#N/A				#N/A	#N/A	#N/A
PIP	#N/A	#N/A	#N/A				#N/A	#N/A	#N/A
PKDCC	#N/A	#N/A	Pkdcc				#N/A	#N/A	#N/A
PLA1A	#N/A	#N/A	#N/A				#N/A	#N/A	#N/A
PLA2G10	#N/A	#N/A	#N/A				#N/A	#N/A	#N/A
PLA2G12A	#N/A	#N/A	#N/A				#N/A	#N/A	#N/A
PLA2G12B	#N/A	#N/A	#N/A				#N/A	#N/A	#N/A
PLA2G1B	#N/A	#N/A	#N/A				#N/A	#N/A	#N/A
PLA2G2A	#N/A	#N/A	#N/A				#N/A	#N/A	#N/A
PLA2G2C	#N/A	#N/A	#N/A				#N/A	#N/A	#N/A
PLA2G2D	#N/A	#N/A	#N/A				#N/A	#N/A	#N/A
PLA2G2E	#N/A	#N/A	Pla2g2e				#N/A	#N/A	#N/A
PLA2G3	#N/A	#N/A	#N/A				#N/A	#N/A	#N/A
PLA2G5	#N/A	#N/A	#N/A				#N/A	#N/A	#N/A
PLA2G7	#N/A	#N/A	#N/A				#N/A	#N/A	#N/A
PLA2R1	#N/A	#N/A	#N/A				#N/A	#N/A	#N/A
PLAC1	#N/A	#N/A	#N/A				#N/A	#N/A	#N/A
PLAC9	#N/A	#N/A	#N/A				#N/A	#N/A	#N/A
PLAT	#N/A	#N/A	Plat				#N/A	#N/A	#N/A
PLAU	#N/A	#N/A	#N/A				#N/A	#N/A	#N/A
PLG	#N/A	#N/A	#N/A				#N/A	#N/A	#N/A
PLGLB1	#N/A	#N/A	#N/A				#N/A	#N/A	#N/A
PLGLB2	#N/A	#N/A	#N/A				#N/A	#N/A	#N/A
PLOD3	#N/A	#N/A	#N/A				#N/A	#N/A	#N/A
PLTP	#N/A	#N/A	#N/A				#N/A	#N/A	#N/A
PM20D1	#N/A	#N/A	#N/A				#N/A	#N/A	#N/A
PMCH	#N/A	#N/A	#N/A				#N/A	#N/A	#N/A
PNLIP	#N/A	#N/A	#N/A				#N/A	#N/A	#N/A
PNLIPRP1	#N/A	#N/A	#N/A				Pnliprp1	Pnliprp1	Pnliprp1
PNLIPRP3	#N/A	#N/A	#N/A				#N/A	#N/A	#N/A
PNOC	#N/A	#N/A	#N/A				#N/A	#N/A	#N/A
PODN	#N/A	#N/A	#N/A				#N/A	#N/A	#N/A
PODNL1	#N/A	#N/A	#N/A				#N/A	#N/A	#N/A
POMC	#N/A	#N/A	#N/A				#N/A	#N/A	#N/A
PON1	#N/A	#N/A	#N/A				#N/A	#N/A	#N/A
PON2	#N/A	#N/A	#N/A				#N/A	#N/A	#N/A
PON3	Pon3	Pon3	Pon3				#N/A	#N/A	#N/A
POSTN	#N/A	#N/A	#N/A				#N/A	#N/A	#N/A
PPBP	#N/A	#N/A	Ppbp				#N/A	#N/A	#N/A
PPIA	#N/A	#N/A	#N/A				#N/A	#N/A	#N/A
PPIB	#N/A	#N/A	#N/A				#N/A	#N/A	#N/A
PPY	#N/A	#N/A	#N/A				#N/A	#N/A	#N/A
PRADC1	#N/A	#N/A	#N/A				#N/A	#N/A	#N/A
PRAP1	#N/A	#N/A	#N/A				#N/A	#N/A	#N/A
PRB1	#N/A	#N/A	#N/A				#N/A	#N/A	#N/A
PRB2	#N/A	#N/A	#N/A				#N/A	#N/A	#N/A
PRB3	#N/A	#N/A	#N/A				#N/A	#N/A	#N/A
PRB4	#N/A	#N/A	#N/A				#N/A	#N/A	#N/A
PRELP	#N/A	#N/A	#N/A				Prelp	Prelp	#N/A
PRG3	#N/A	#N/A	#N/A				#N/A	#N/A	#N/A
PRG4	#N/A	#N/A	#N/A				#N/A	Prg4	#N/A
PRH2	#N/A	#N/A	#N/A				#N/A	#N/A	#N/A
PRL	#N/A	#N/A	#N/A				#N/A	#N/A	#N/A
PRLH	#N/A	#N/A	#N/A				#N/A	#N/A	#N/A
PROC	#N/A	#N/A	#N/A				#N/A	#N/A	#N/A
PROK1	#N/A	#N/A	#N/A				#N/A	#N/A	#N/A
PROK2	#N/A	#N/A	#N/A				#N/A	#N/A	#N/A
PROS1	#N/A	#N/A	#N/A				#N/A	#N/A	#N/A
PROZ	#N/A	#N/A	#N/A				#N/A	#N/A	#N/A
PRR27	#N/A	#N/A	#N/A				#N/A	#N/A	#N/A
PRR4	#N/A	#N/A	#N/A				#N/A	#N/A	#N/A
PRSS1	#N/A	#N/A	#N/A				#N/A	#N/A	#N/A
PRSS12	#N/A	#N/A	#N/A				#N/A	#N/A	#N/A
PRSS16	#N/A	#N/A	#N/A				Prss16	Prss16	Prss16
PRSS2	#N/A	#N/A	#N/A				#N/A	#N/A	#N/A
PRSS22	Prss22	Prss22	Prss22				#N/A	#N/A	#N/A
PRSS23	#N/A	#N/A	#N/A				#N/A	#N/A	#N/A
PRSS27	Prss27	Prss27	Prss27				#N/A	#N/A	#N/A
PRSS3	#N/A	#N/A	#N/A				#N/A	#N/A	#N/A
PRSS33	#N/A	#N/A	#N/A				#N/A	#N/A	#N/A
PRSS35	#N/A	#N/A	#N/A				#N/A	#N/A	#N/A
PRSS36	#N/A	#N/A	#N/A				#N/A	#N/A	#N/A
PRSS37	#N/A	#N/A	#N/A				#N/A	#N/A	#N/A
PRSS38	#N/A	#N/A	#N/A				#N/A	#N/A	#N/A
PRSS42	#N/A	#N/A	#N/A				#N/A	#N/A	#N/A
PRSS48	#N/A	#N/A	#N/A				#N/A	#N/A	#N/A
PRSS51	#N/A	#N/A	#N/A				#N/A	#N/A	#N/A
PRSS53	Prss53	#N/A	#N/A				#N/A	#N/A	#N/A
PRSS54	#N/A	#N/A	#N/A				#N/A	#N/A	#N/A
PRSS57	#N/A	#N/A	#N/A				#N/A	#N/A	#N/A
PRSS58	#N/A	#N/A	#N/A				#N/A	#N/A	#N/A
PRSS8	#N/A	#N/A	#N/A				#N/A	#N/A	#N/A
PRTN3	#N/A	#N/A	Prtn3				#N/A	#N/A	#N/A
PSAPL1	Psapl1	Psapl1	Psapl1				#N/A	#N/A	#N/A
PSG1	#N/A	#N/A	#N/A				#N/A	#N/A	#N/A
PSG11	#N/A	#N/A	#N/A				#N/A	#N/A	#N/A
PSG2	#N/A	#N/A	#N/A				#N/A	#N/A	#N/A
PSG3	#N/A	#N/A	#N/A				#N/A	#N/A	#N/A
PSG4	#N/A	#N/A	#N/A				#N/A	#N/A	#N/A
PSG5	#N/A	#N/A	#N/A				#N/A	#N/A	#N/A
PSG6	#N/A	#N/A	#N/A				#N/A	#N/A	#N/A
PSG7	#N/A	#N/A	#N/A				#N/A	#N/A	#N/A
PSG8	#N/A	#N/A	#N/A				#N/A	#N/A	#N/A
PSG9	#N/A	#N/A	#N/A				#N/A	#N/A	#N/A
PSORS1C2	#N/A	#N/A	#N/A				#N/A	#N/A	#N/A
PSPN	#N/A	#N/A	#N/A				#N/A	#N/A	#N/A
PTEN	#N/A	#N/A	#N/A				#N/A	#N/A	#N/A
PTGDS	#N/A	#N/A	#N/A				#N/A	#N/A	#N/A
PTH	#N/A	#N/A	#N/A				#N/A	#N/A	#N/A
PTH2	#N/A	#N/A	#N/A				#N/A	#N/A	#N/A
PTHLH	#N/A	#N/A	#N/A				#N/A	#N/A	#N/A
PTK7	#N/A	#N/A	Ptk7				#N/A	#N/A	#N/A
PTN	#N/A	#N/A	#N/A				#N/A	#N/A	#N/A
PTPRS	#N/A	#N/A	Ptprs				#N/A	#N/A	#N/A
PTPRZ1	Ptprz1	Ptprz1	Ptprz1				#N/A	#N/A	#N/A
PTX3	#N/A	#N/A	#N/A				#N/A	#N/A	#N/A
PTX4	#N/A	#N/A	#N/A				#N/A	#N/A	#N/A
PVR	#N/A	#N/A	#N/A				#N/A	#N/A	#N/A
PXDN	#N/A	#N/A	#N/A				#N/A	#N/A	#N/A
PYY	#N/A	#N/A	#N/A				#N/A	#N/A	#N/A
PZP	#N/A	#N/A	#N/A				#N/A	#N/A	#N/A
QPCT	#N/A	#N/A	#N/A				#N/A	#N/A	#N/A
QRFP	#N/A	#N/A	#N/A				#N/A	#N/A	#N/A
QSOX1	Qsox1	Qsox1	Qsox1				#N/A	#N/A	#N/A
R3HDML	#N/A	#N/A	#N/A				#N/A	#N/A	#N/A
RAET1G	#N/A	#N/A	#N/A				#N/A	#N/A	#N/A
RARRES2	#N/A	#N/A	#N/A				#N/A	#N/A	#N/A
RBP3	#N/A	#N/A	#N/A				#N/A	#N/A	#N/A
RBP4	#N/A	#N/A	#N/A				#N/A	#N/A	#N/A
REG1A	#N/A	#N/A	#N/A				#N/A	#N/A	#N/A
REG1B	#N/A	#N/A	#N/A				#N/A	#N/A	#N/A
REG3A	#N/A	#N/A	#N/A				#N/A	#N/A	#N/A
REG3G	Reg3g	Reg3g	Reg3g				#N/A	#N/A	#N/A
REG4	#N/A	#N/A	#N/A				#N/A	#N/A	#N/A
RELN	#N/A	#N/A	#N/A				Reln	Reln	Reln
REN	#N/A	#N/A	#N/A				#N/A	#N/A	#N/A
RETN	#N/A	#N/A	#N/A				#N/A	#N/A	#N/A
RETNLB	#N/A	#N/A	#N/A				#N/A	#N/A	#N/A
RGMA	#N/A	#N/A	Rgma				#N/A	#N/A	#N/A
RLN1	#N/A	#N/A	#N/A				#N/A	#N/A	#N/A
RLN2	#N/A	#N/A	#N/A				#N/A	#N/A	#N/A
RLN3	#N/A	#N/A	#N/A				#N/A	#N/A	#N/A
RNASE1	#N/A	#N/A	#N/A				Rnase1	Rnase1	Rnase1
RNASE10	#N/A	#N/A	#N/A				#N/A	#N/A	#N/A
RNASE11	#N/A	#N/A	#N/A				#N/A	#N/A	#N/A
RNASE12	#N/A	#N/A	#N/A				#N/A	#N/A	#N/A
RNASE13	#N/A	#N/A	#N/A				#N/A	#N/A	#N/A
RNASE2	#N/A	#N/A	#N/A				#N/A	#N/A	#N/A
RNASE3	#N/A	#N/A	#N/A				#N/A	#N/A	#N/A
RNASE4	#N/A	#N/A	#N/A				Rnase4	Rnase4	#N/A
RNASE6	#N/A	#N/A	#N/A				#N/A	#N/A	#N/A
RNASE7	#N/A	#N/A	#N/A				#N/A	#N/A	#N/A
RNASE8	#N/A	#N/A	#N/A				#N/A	#N/A	#N/A
RNASE9	#N/A	#N/A	#N/A				#N/A	#N/A	#N/A
RNASET2	#N/A	#N/A	#N/A				#N/A	#N/A	#N/A
RNLS	#N/A	#N/A	#N/A				#N/A	#N/A	#N/A
RNPEP	#N/A	#N/A	#N/A				#N/A	#N/A	#N/A
RPTN	#N/A	#N/A	#N/A				#N/A	#N/A	#N/A
RS1	#N/A	#N/A	#N/A				#N/A	#N/A	#N/A
RSPO1	#N/A	#N/A	#N/A				#N/A	#N/A	#N/A
RSPO2	#N/A	#N/A	#N/A				Rspo2	Rspo2	Rspo2
RSPO3	#N/A	#N/A	#N/A				#N/A	Rspo3	#N/A
RSPO4	#N/A	#N/A	#N/A				#N/A	#N/A	#N/A
RSPRY1	#N/A	#N/A	#N/A				#N/A	#N/A	#N/A
RTBDN	#N/A	#N/A	#N/A				#N/A	#N/A	#N/A
S100A12	#N/A	#N/A	#N/A				#N/A	#N/A	#N/A
S100A13	#N/A	#N/A	S100a13				#N/A	#N/A	#N/A
S100A7	#N/A	#N/A	#N/A				#N/A	#N/A	#N/A
S100A8	#N/A	#N/A	#N/A				#N/A	#N/A	#N/A
S100A9	S100a9	S100a9	S100a9				#N/A	#N/A	#N/A
SAA1	#N/A	#N/A	#N/A				#N/A	#N/A	#N/A
SAA2	#N/A	#N/A	#N/A				#N/A	#N/A	#N/A
SAA4	#N/A	#N/A	#N/A				#N/A	#N/A	#N/A
SBSN	#N/A	#N/A	#N/A				#N/A	#N/A	#N/A
SBSPON	#N/A	#N/A	#N/A				#N/A	#N/A	#N/A
SCG2	#N/A	#N/A	#N/A				#N/A	#N/A	#N/A
SCG3	#N/A	#N/A	#N/A				#N/A	#N/A	#N/A
SCG5	#N/A	#N/A	#N/A				#N/A	#N/A	#N/A
SCGB1A1	#N/A	#N/A	#N/A				#N/A	#N/A	#N/A
SCGB1C1	Scgb1c1	#N/A	#N/A				#N/A	#N/A	#N/A
SCGB1C2	#N/A	#N/A	#N/A				#N/A	#N/A	#N/A
SCGB1D1	#N/A	#N/A	#N/A				#N/A	#N/A	#N/A
SCGB1D2	#N/A	#N/A	#N/A				#N/A	#N/A	#N/A
SCGB1D4	#N/A	#N/A	#N/A				#N/A	#N/A	#N/A
SCGB2A1	#N/A	#N/A	#N/A				#N/A	#N/A	#N/A
SCGB2A2	#N/A	#N/A	#N/A				#N/A	#N/A	#N/A
SCGB2B2	#N/A	#N/A	#N/A				#N/A	#N/A	#N/A
SCGB3A1	#N/A	#N/A	#N/A				#N/A	#N/A	#N/A
SCGB3A2	#N/A	#N/A	#N/A				#N/A	Scgb3a2	#N/A
SCPEP1	Scpep1	Scpep1	Scpep1				#N/A	#N/A	#N/A
SCRG1	#N/A	#N/A	#N/A				#N/A	#N/A	#N/A
SCT	#N/A	#N/A	#N/A				#N/A	#N/A	#N/A
SCUBE1	#N/A	#N/A	#N/A				#N/A	#N/A	#N/A
SCUBE2	#N/A	#N/A	#N/A				Scube2	Scube2	Scube2
SCUBE3	#N/A	#N/A	#N/A				#N/A	#N/A	#N/A
SDC1	Sdc1	Sdc1	Sdc1				#N/A	#N/A	#N/A
SDC4	Sdc4	Sdc4	Sdc4				#N/A	#N/A	#N/A
SECTM1	#N/A	#N/A	#N/A				#N/A	#N/A	#N/A
SELENOP	#N/A	#N/A	#N/A				#N/A	#N/A	#N/A
SEMA3A	#N/A	#N/A	#N/A				#N/A	#N/A	#N/A
SEMA3B	#N/A	#N/A	#N/A				#N/A	#N/A	#N/A
SEMA3C	#N/A	#N/A	#N/A				#N/A	#N/A	#N/A
SEMA3D	#N/A	#N/A	#N/A				#N/A	Sema3d	#N/A
SEMA3E	#N/A	#N/A	#N/A				#N/A	#N/A	#N/A
SEMA3F	Sema3f	Sema3f	Sema3f				#N/A	#N/A	#N/A
SEMA3G	#N/A	#N/A	#N/A				#N/A	#N/A	#N/A
SEMG1	#N/A	#N/A	#N/A				#N/A	#N/A	#N/A
SEMG2	#N/A	#N/A	#N/A				#N/A	#N/A	#N/A
SERPINA1	#N/A	#N/A	#N/A				#N/A	#N/A	#N/A
SERPINA10	Serpina10	Serpina10	Serpina10				#N/A	#N/A	#N/A
SERPINA11	#N/A	#N/A	#N/A				#N/A	#N/A	#N/A
SERPINA12	#N/A	#N/A	#N/A				#N/A	#N/A	#N/A
SERPINA3	#N/A	#N/A	#N/A				#N/A	#N/A	#N/A
SERPINA4	#N/A	#N/A	#N/A				#N/A	#N/A	#N/A
SERPINA5	#N/A	#N/A	#N/A				Serpina5	Serpina5	Serpina5
SERPINA6	#N/A	#N/A	#N/A				#N/A	#N/A	#N/A
SERPINA7	#N/A	#N/A	#N/A				#N/A	#N/A	#N/A
SERPINA9	#N/A	#N/A	#N/A				#N/A	#N/A	#N/A
SERPINC1	#N/A	#N/A	#N/A				#N/A	#N/A	#N/A
SERPIND1	#N/A	#N/A	#N/A				#N/A	#N/A	#N/A
SERPINE1	#N/A	Serpine1	Serpine1				#N/A	#N/A	#N/A
SERPINE2	#N/A	#N/A	#N/A				#N/A	#N/A	#N/A
SERPINE3	#N/A	#N/A	#N/A				#N/A	#N/A	#N/A
SERPINF1	#N/A	#N/A	#N/A				#N/A	#N/A	#N/A
SERPINF2	#N/A	#N/A	#N/A				#N/A	#N/A	#N/A
SERPING1	#N/A	#N/A	#N/A				#N/A	#N/A	#N/A
SERPINI1	#N/A	#N/A	#N/A				#N/A	#N/A	#N/A
SERPINI2	#N/A	#N/A	#N/A				#N/A	#N/A	#N/A
SFN	#N/A	Sfn	Sfn				#N/A	#N/A	#N/A
SFRP1	#N/A	#N/A	#N/A				#N/A	#N/A	#N/A
SFRP2	#N/A	#N/A	#N/A				#N/A	#N/A	#N/A
SFRP4	#N/A	#N/A	#N/A				#N/A	#N/A	#N/A
SFRP5	#N/A	#N/A	#N/A				#N/A	#N/A	#N/A
SFTA2	#N/A	#N/A	#N/A				#N/A	#N/A	#N/A
SFTA3	#N/A	#N/A	#N/A				#N/A	#N/A	#N/A
SFTPA1	#N/A	#N/A	#N/A				#N/A	#N/A	#N/A
SFTPA2	#N/A	#N/A	#N/A				#N/A	#N/A	#N/A
SFTPB	#N/A	#N/A	#N/A				#N/A	#N/A	#N/A
SFTPC	#N/A	#N/A	#N/A				#N/A	#N/A	#N/A
SFTPD	#N/A	#N/A	#N/A				#N/A	#N/A	#N/A
SHBG	#N/A	#N/A	#N/A				#N/A	#N/A	#N/A
SHE	#N/A	#N/A	#N/A				#N/A	#N/A	#N/A
SIRPD	#N/A	#N/A	#N/A				#N/A	#N/A	#N/A
SLAMF1	#N/A	#N/A	#N/A				#N/A	#N/A	#N/A
SLIT1	#N/A	#N/A	#N/A				#N/A	#N/A	#N/A
SLIT2	#N/A	#N/A	#N/A				Slit2	#N/A	#N/A
SLIT3	#N/A	#N/A	#N/A				#N/A	#N/A	#N/A
SLITRK1	#N/A	#N/A	#N/A				#N/A	#N/A	#N/A
SLPI	#N/A	#N/A	Slpi				#N/A	#N/A	#N/A
SLURP1	#N/A	#N/A	Slurp1				#N/A	#N/A	#N/A
SLURP2	#N/A	#N/A	#N/A				#N/A	#N/A	#N/A
SMIM31	#N/A	#N/A	#N/A				#N/A	#N/A	#N/A
SMOC1	#N/A	#N/A	#N/A				#N/A	#N/A	#N/A
SMOC2	#N/A	#N/A	#N/A				#N/A	#N/A	#N/A
SMPD1	#N/A	#N/A	#N/A				#N/A	#N/A	#N/A
SMPDL3A	#N/A	#N/A	#N/A				#N/A	#N/A	#N/A
SMPDL3B	#N/A	#N/A	#N/A				#N/A	#N/A	#N/A
SMR3A	#N/A	#N/A	#N/A				#N/A	#N/A	#N/A
SMR3B	#N/A	#N/A	#N/A				#N/A	#N/A	#N/A
SNED1	#N/A	#N/A	#N/A				#N/A	#N/A	#N/A
SOD3	#N/A	#N/A	#N/A				#N/A	#N/A	#N/A
SOGA1	#N/A	#N/A	#N/A				#N/A	#N/A	#N/A
SORL1	#N/A	#N/A	#N/A				#N/A	#N/A	#N/A
SOST	#N/A	#N/A	#N/A				Sost	Sost	#N/A
SOSTDC1	#N/A	#N/A	#N/A				#N/A	#N/A	#N/A
SPACA3	#N/A	#N/A	#N/A				#N/A	#N/A	#N/A
SPACA5	#N/A	#N/A	#N/A				#N/A	#N/A	#N/A
SPACA5B	#N/A	#N/A	#N/A				#N/A	#N/A	#N/A
SPACA7	#N/A	#N/A	#N/A				#N/A	#N/A	#N/A
SPAG11A	#N/A	#N/A	#N/A				#N/A	#N/A	#N/A
SPAG11B	#N/A	#N/A	#N/A				#N/A	#N/A	#N/A
SPARC	#N/A	#N/A	#N/A				#N/A	#N/A	#N/A
SPARCL1	#N/A	#N/A	#N/A				#N/A	#N/A	#N/A
SPATA20	#N/A	#N/A	#N/A				#N/A	#N/A	#N/A
SPINK1	#N/A	#N/A	#N/A				#N/A	#N/A	#N/A
SPINK13	#N/A	#N/A	#N/A				#N/A	#N/A	#N/A
SPINK14	#N/A	#N/A	#N/A				#N/A	#N/A	#N/A
SPINK2	#N/A	#N/A	#N/A				#N/A	#N/A	#N/A
SPINK4	#N/A	#N/A	#N/A				#N/A	#N/A	#N/A
SPINK5	Spink5	Spink5	Spink5				#N/A	#N/A	#N/A
SPINK6	#N/A	#N/A	#N/A				#N/A	#N/A	#N/A
SPINK7	#N/A	#N/A	#N/A				#N/A	#N/A	#N/A
SPINK8	#N/A	#N/A	#N/A				#N/A	#N/A	#N/A
SPINK9	#N/A	#N/A	#N/A				#N/A	#N/A	#N/A
SPINT1	#N/A	#N/A	#N/A				#N/A	#N/A	#N/A
SPINT3	#N/A	#N/A	#N/A				#N/A	#N/A	#N/A
SPINT4	#N/A	#N/A	#N/A				#N/A	#N/A	#N/A
SPOCK1	#N/A	#N/A	#N/A				#N/A	#N/A	#N/A
SPOCK2	#N/A	#N/A	#N/A				Spock2	Spock2	#N/A
SPOCK3	#N/A	#N/A	#N/A				#N/A	#N/A	#N/A
SPON1	#N/A	#N/A	#N/A				#N/A	#N/A	#N/A
SPON2	#N/A	#N/A	#N/A				#N/A	#N/A	#N/A
SPP1	#N/A	#N/A	#N/A				#N/A	#N/A	#N/A
SPP2	#N/A	#N/A	#N/A				#N/A	#N/A	#N/A
SPTY2D1OS	#N/A	#N/A	#N/A				#N/A	#N/A	#N/A
SPX	#N/A	#N/A	#N/A				#N/A	#N/A	#N/A
SRPX	#N/A	#N/A	#N/A				#N/A	#N/A	#N/A
SRPX2	#N/A	#N/A	#N/A				#N/A	#N/A	#N/A
SSC4D	#N/A	#N/A	#N/A				#N/A	#N/A	#N/A
SSC5D	#N/A	#N/A	#N/A				#N/A	#N/A	#N/A
SSPO	Sspo	Sspo	Sspo				#N/A	#N/A	#N/A
SST	#N/A	#N/A	#N/A				#N/A	#N/A	#N/A
ST6GAL1	#N/A	#N/A	#N/A				#N/A	#N/A	#N/A
STATH	#N/A	#N/A	#N/A				#N/A	#N/A	#N/A
STC1	#N/A	#N/A	#N/A				#N/A	#N/A	#N/A
STC2	Stc2	Stc2	Stc2				#N/A	#N/A	#N/A
SVBP	#N/A	#N/A	#N/A				#N/A	#N/A	#N/A
TAC1	#N/A	#N/A	#N/A				#N/A	#N/A	#N/A
TAC3	#N/A	#N/A	#N/A				#N/A	#N/A	#N/A
TAC4	#N/A	#N/A	#N/A				#N/A	#N/A	#N/A
TBL2	#N/A	#N/A	#N/A				#N/A	#N/A	#N/A
TCN1	#N/A	#N/A	#N/A				#N/A	#N/A	#N/A
TCN2	#N/A	#N/A	#N/A				#N/A	#N/A	#N/A
TDGF1	#N/A	#N/A	#N/A				#N/A	#N/A	#N/A
TECTA	#N/A	#N/A	#N/A				#N/A	#N/A	#N/A
TECTB	#N/A	#N/A	#N/A				#N/A	#N/A	#N/A
TEK	#N/A	#N/A	#N/A				#N/A	#N/A	#N/A
TEPP	#N/A	#N/A	#N/A				#N/A	#N/A	#N/A
TEX101	#N/A	#N/A	#N/A				#N/A	#N/A	#N/A
TEX264	#N/A	#N/A	#N/A				#N/A	#N/A	#N/A
TF	#N/A	#N/A	#N/A				#N/A	#N/A	#N/A
TFF1	#N/A	#N/A	#N/A				#N/A	#N/A	#N/A
TFF2	#N/A	#N/A	#N/A				#N/A	#N/A	#N/A
TFF3	Tff3	Tff3	Tff3				#N/A	#N/A	#N/A
TFPI	#N/A	#N/A	#N/A				Tfpi	Tfpi	Tfpi
TFPI2	#N/A	#N/A	#N/A				#N/A	#N/A	#N/A
TFRC	#N/A	Tfrc	Tfrc				#N/A	#N/A	#N/A
TG	#N/A	#N/A	#N/A				#N/A	#N/A	#N/A
TGFA	#N/A	#N/A	#N/A				#N/A	#N/A	#N/A
TGFB1	#N/A	#N/A	Tgfb1				#N/A	#N/A	#N/A
TGFB2	#N/A	#N/A	#N/A				Tgfb2	Tgfb2	#N/A
TGFB3	#N/A	#N/A	#N/A				#N/A	#N/A	#N/A
TGFBI	#N/A	#N/A	#N/A				#N/A	#N/A	#N/A
TGFBR3	#N/A	#N/A	#N/A				Tgfbr3	Tgfbr3	Tgfbr3
THBS1	#N/A	Thbs1	Thbs1				#N/A	#N/A	#N/A
THBS2	#N/A	#N/A	#N/A				#N/A	#N/A	#N/A
THBS3	#N/A	#N/A	#N/A				#N/A	#N/A	#N/A
THBS4	#N/A	#N/A	#N/A				#N/A	#N/A	#N/A
THEM6	Them6	Them6	Them6				#N/A	#N/A	#N/A
THNSL2	#N/A	#N/A	#N/A				#N/A	#N/A	#N/A
THPO	Thpo	Thpo	Thpo				#N/A	#N/A	#N/A
THSD4	#N/A	Thsd4	Thsd4				#N/A	#N/A	#N/A
THSD7A	#N/A	#N/A	#N/A				#N/A	#N/A	#N/A
TIMP1	#N/A	#N/A	Timp1				#N/A	#N/A	#N/A
TIMP2	Timp2	Timp2	#N/A				#N/A	#N/A	#N/A
TIMP3	#N/A	#N/A	#N/A				#N/A	#N/A	#N/A
TIMP4	Timp4	Timp4	Timp4				#N/A	#N/A	#N/A
TINAG	#N/A	Tinag	Tinag				#N/A	#N/A	#N/A
TINAGL1	#N/A	#N/A	#N/A				#N/A	#N/A	#N/A
TLL1	#N/A	#N/A	#N/A				#N/A	#N/A	#N/A
TLL2	#N/A	#N/A	#N/A				#N/A	#N/A	#N/A
TMEFF2	#N/A	#N/A	#N/A				#N/A	#N/A	#N/A
TMEM155	#N/A	#N/A	#N/A				#N/A	#N/A	#N/A
TNC	#N/A	#N/A	#N/A				#N/A	#N/A	#N/A
TNF	Tnf	Tnf	Tnf				#N/A	#N/A	#N/A
TNFAIP6	#N/A	#N/A	#N/A				#N/A	#N/A	#N/A
TNFRSF11B	#N/A	#N/A	Tnfrsf11b				#N/A	#N/A	#N/A
TNFRSF18	#N/A	#N/A	#N/A				#N/A	#N/A	#N/A
TNFRSF1A	#N/A	#N/A	#N/A				#N/A	#N/A	#N/A
TNFRSF1B	Tnfrsf1b	Tnfrsf1b	Tnfrsf1b				#N/A	#N/A	#N/A
TNFRSF25	#N/A	#N/A	#N/A				#N/A	#N/A	#N/A
TNFRSF6B	#N/A	#N/A	#N/A				#N/A	#N/A	#N/A
TNFSF10	Tnfsf10	Tnfsf10	Tnfsf10				#N/A	#N/A	#N/A
TNFSF11	#N/A	#N/A	#N/A				#N/A	#N/A	#N/A
TNFSF12	#N/A	#N/A	#N/A				Tnfsf12	Tnfsf12	#N/A
TNFSF13	#N/A	#N/A	#N/A				#N/A	#N/A	#N/A
TNFSF13B	#N/A	#N/A	#N/A				#N/A	#N/A	#N/A
TNFSF14	#N/A	#N/A	#N/A				#N/A	#N/A	#N/A
TNFSF15	#N/A	#N/A	#N/A				#N/A	#N/A	#N/A
TNN	#N/A	#N/A	#N/A				#N/A	#N/A	#N/A
TNR	#N/A	#N/A	#N/A				#N/A	#N/A	#N/A
TNXB	#N/A	#N/A	#N/A				#N/A	Tnxb	#N/A
TOR2A	#N/A	#N/A	#N/A				#N/A	#N/A	#N/A
TPSAB1	#N/A	#N/A	#N/A				#N/A	#N/A	#N/A
TPSB2	#N/A	#N/A	#N/A				Tpsb2	Tpsb2	Tpsb2
TREML4	#N/A	#N/A	#N/A				#N/A	#N/A	#N/A
TRH	#N/A	#N/A	#N/A				#N/A	#N/A	#N/A
TSHB	#N/A	#N/A	#N/A				#N/A	#N/A	#N/A
TSKU	#N/A	#N/A	#N/A				#N/A	#N/A	#N/A
TSLP	#N/A	#N/A	#N/A				#N/A	#N/A	#N/A
TSPEAR	#N/A	#N/A	#N/A				#N/A	#N/A	#N/A
TTC9B	#N/A	#N/A	#N/A				#N/A	#N/A	#N/A
TTR	#N/A	#N/A	#N/A				#N/A	#N/A	#N/A
TUFT1	#N/A	#N/A	#N/A				#N/A	#N/A	#N/A
TULP2	#N/A	#N/A	#N/A				Tulp2	Tulp2	Tulp2
TULP3	#N/A	#N/A	#N/A				Tulp3	Tulp3	Tulp3
TWSG1	#N/A	#N/A	#N/A				#N/A	#N/A	#N/A
TXNDC16	#N/A	#N/A	#N/A				#N/A	#N/A	#N/A
UCMA	#N/A	#N/A	#N/A				#N/A	#N/A	#N/A
UCN	#N/A	#N/A	#N/A				#N/A	#N/A	#N/A
UCN2	#N/A	#N/A	#N/A				#N/A	#N/A	#N/A
UCN3	#N/A	#N/A	#N/A				#N/A	#N/A	#N/A
ULBP2	#N/A	#N/A	#N/A				#N/A	#N/A	#N/A
UMOD	#N/A	#N/A	#N/A				#N/A	#N/A	#N/A
UTS2	#N/A	#N/A	#N/A				#N/A	#N/A	#N/A
UTS2B	#N/A	#N/A	#N/A				#N/A	Uts2b	#N/A
VASH1	#N/A	#N/A	Vash1				#N/A	#N/A	#N/A
VASH2	#N/A	#N/A	#N/A				#N/A	#N/A	#N/A
VASN	#N/A	#N/A	#N/A				#N/A	#N/A	#N/A
VCAN	#N/A	#N/A	#N/A				#N/A	#N/A	#N/A
VEGFA	#N/A	#N/A	#N/A				#N/A	#N/A	#N/A
VEGFB	#N/A	#N/A	#N/A				#N/A	#N/A	#N/A
VEGFC	#N/A	#N/A	#N/A				#N/A	#N/A	#N/A
VEGFD	#N/A	#N/A	#N/A				#N/A	#N/A	#N/A
VGF	#N/A	#N/A	#N/A				#N/A	#N/A	#N/A
VIP	#N/A	#N/A	#N/A				#N/A	#N/A	#N/A
VIT	#N/A	#N/A	#N/A				#N/A	#N/A	#N/A
VMO1	#N/A	#N/A	#N/A				#N/A	#N/A	#N/A
VNN3	#N/A	Vnn3	Vnn3				#N/A	#N/A	#N/A
VSTM1	#N/A	#N/A	#N/A				#N/A	#N/A	#N/A
VSTM2A	#N/A	#N/A	#N/A				#N/A	#N/A	#N/A
VSTM2L	#N/A	#N/A	#N/A				#N/A	#N/A	#N/A
VSTM4	#N/A	#N/A	#N/A				#N/A	#N/A	#N/A
VTN	#N/A	#N/A	#N/A				#N/A	#N/A	#N/A
VWA1	#N/A	#N/A	#N/A				#N/A	#N/A	#N/A
VWA2	#N/A	#N/A	#N/A				#N/A	#N/A	#N/A
VWA3A	#N/A	#N/A	#N/A				#N/A	#N/A	#N/A
VWA5B1	#N/A	#N/A	#N/A				#N/A	#N/A	#N/A
VWA7	#N/A	Vwa7	Vwa7				#N/A	#N/A	#N/A
VWC2	#N/A	#N/A	#N/A				#N/A	#N/A	#N/A
VWC2L	#N/A	#N/A	#N/A				#N/A	#N/A	#N/A
VWCE	#N/A	#N/A	#N/A				#N/A	#N/A	#N/A
VWDE	#N/A	#N/A	#N/A				#N/A	#N/A	#N/A
VWF	#N/A	#N/A	#N/A				#N/A	#N/A	#N/A
WDR25	#N/A	#N/A	#N/A				#N/A	#N/A	#N/A
WFDC1	#N/A	#N/A	#N/A				#N/A	#N/A	#N/A
WFDC10A	#N/A	#N/A	#N/A				#N/A	#N/A	#N/A
WFDC10B	#N/A	#N/A	#N/A				#N/A	#N/A	#N/A
WFDC11	#N/A	#N/A	#N/A				#N/A	#N/A	#N/A
WFDC12	#N/A	Wfdc12	Wfdc12				#N/A	#N/A	#N/A
WFDC13	#N/A	#N/A	#N/A				#N/A	#N/A	#N/A
WFDC2	Wfdc2	Wfdc2	Wfdc2				#N/A	#N/A	#N/A
WFDC3	#N/A	#N/A	#N/A				#N/A	#N/A	#N/A
WFDC5	#N/A	#N/A	#N/A				#N/A	#N/A	#N/A
WFDC6	#N/A	#N/A	#N/A				#N/A	#N/A	#N/A
WFDC8	#N/A	#N/A	#N/A				#N/A	#N/A	#N/A
WFDC9	#N/A	#N/A	#N/A				#N/A	#N/A	#N/A
WFIKKN1	#N/A	#N/A	#N/A				#N/A	#N/A	#N/A
WFIKKN2	#N/A	#N/A	#N/A				#N/A	#N/A	#N/A
WIF1	#N/A	#N/A	#N/A				Wif1	Wif1	#N/A
WISP1	#N/A	#N/A	#N/A				#N/A	#N/A	#N/A
WISP2	#N/A	#N/A	#N/A				#N/A	#N/A	#N/A
WISP3	#N/A	#N/A	#N/A				#N/A	#N/A	#N/A
WNT1	#N/A	#N/A	#N/A				#N/A	#N/A	#N/A
WNT10A	#N/A	#N/A	#N/A				#N/A	#N/A	#N/A
WNT10B	#N/A	#N/A	#N/A				#N/A	#N/A	#N/A
WNT11	#N/A	#N/A	Wnt11				#N/A	#N/A	#N/A
WNT16	#N/A	#N/A	#N/A				#N/A	#N/A	#N/A
WNT2	#N/A	#N/A	#N/A				#N/A	#N/A	#N/A
WNT2B	#N/A	#N/A	#N/A				#N/A	#N/A	#N/A
WNT3	#N/A	#N/A	#N/A				#N/A	#N/A	#N/A
WNT3A	#N/A	#N/A	#N/A				#N/A	#N/A	#N/A
WNT4	Wnt4	Wnt4	Wnt4				#N/A	#N/A	#N/A
WNT5A	#N/A	#N/A	#N/A				#N/A	#N/A	#N/A
WNT5B	#N/A	#N/A	#N/A				#N/A	#N/A	#N/A
WNT6	#N/A	#N/A	#N/A				#N/A	#N/A	#N/A
WNT7A	#N/A	#N/A	#N/A				#N/A	#N/A	#N/A
WNT7B	#N/A	#N/A	#N/A				#N/A	#N/A	#N/A
WNT8A	#N/A	#N/A	#N/A				#N/A	#N/A	#N/A
WNT8B	#N/A	#N/A	#N/A				#N/A	#N/A	#N/A
WNT9A	#N/A	#N/A	#N/A				#N/A	#N/A	#N/A
WNT9B	#N/A	#N/A	#N/A				#N/A	#N/A	#N/A
XCL1	Xcl1	Xcl1	#N/A				#N/A	#N/A	#N/A
XCL2	#N/A	#N/A	#N/A				#N/A	#N/A	#N/A
XYLT1	#N/A	#N/A	#N/A				#N/A	#N/A	#N/A
XYLT2	#N/A	#N/A	#N/A				#N/A	#N/A	#N/A
ZG16	#N/A	#N/A	#N/A				#N/A	#N/A	#N/A
ZG16B	#N/A	#N/A	#N/A				#N/A	#N/A	#N/A
ZP1	#N/A	#N/A	#N/A				#N/A	#N/A	#N/A
ZP2	#N/A	#N/A	#N/A				#N/A	#N/A	#N/A
ZP3	#N/A	#N/A	#N/A				#N/A	#N/A	#N/A
ZP4	#N/A	#N/A	#N/A				#N/A	#N/A	#N/A
ZPBP	#N/A	#N/A	#N/A				#N/A	#N/A	#N/A
ZPBP2	#N/A	#N/A	#N/A				Zpbp2	Zpbp2	Zpbp2

## Sheet: DP
PROTEIN CLASS	PTEN - Up						PTEN - Down
Gene	PIN	MED	ADV				PIN	MED	ADV
A1BG	#N/A	#N/A	#N/A				#N/A	#N/A	#N/A
A2M	#N/A	#N/A	#N/A				#N/A	#N/A	#N/A
A2ML1	#N/A	#N/A	#N/A				#N/A	#N/A	#N/A
AADACL2	#N/A	#N/A	#N/A				#N/A	#N/A	#N/A
ABHD15	#N/A	#N/A	#N/A				#N/A	#N/A	#N/A
ABI3BP	#N/A	#N/A	#N/A				#N/A	#N/A	#N/A
ABO	#N/A	#N/A	#N/A				#N/A	#N/A	Abo
AC008687.1	#N/A	#N/A	#N/A				#N/A	#N/A	#N/A
AC233755.1	#N/A	#N/A	#N/A				#N/A	#N/A	#N/A
ACAN	#N/A	#N/A	#N/A				#N/A	#N/A	#N/A
ACE	#N/A	#N/A	#N/A				#N/A	#N/A	Ace
ACE2	#N/A	#N/A	#N/A				#N/A	#N/A	#N/A
ACP7	#N/A	#N/A	#N/A				#N/A	#N/A	#N/A
ACPP	#N/A	#N/A	#N/A				#N/A	#N/A	Acpp
ACR	#N/A	#N/A	#N/A				#N/A	#N/A	#N/A
ADA2	#N/A	#N/A	#N/A				#N/A	#N/A	#N/A
ADAM12	#N/A	#N/A	Adam12				#N/A	#N/A	#N/A
ADAM28	#N/A	#N/A	#N/A				#N/A	#N/A	Adam28
ADAM9	#N/A	#N/A	#N/A				#N/A	#N/A	#N/A
ADAMDEC1	#N/A	#N/A	#N/A				#N/A	#N/A	#N/A
ADAMTS1	#N/A	#N/A	#N/A				#N/A	#N/A	#N/A
ADAMTS10	#N/A	#N/A	Adamts10				#N/A	#N/A	#N/A
ADAMTS12	#N/A	#N/A	#N/A				#N/A	#N/A	#N/A
ADAMTS13	#N/A	#N/A	#N/A				#N/A	#N/A	#N/A
ADAMTS14	#N/A	#N/A	#N/A				#N/A	#N/A	#N/A
ADAMTS15	#N/A	#N/A	Adamts15				#N/A	#N/A	#N/A
ADAMTS16	#N/A	#N/A	#N/A				#N/A	#N/A	#N/A
ADAMTS17	#N/A	#N/A	#N/A				#N/A	#N/A	#N/A
ADAMTS18	#N/A	#N/A	#N/A				#N/A	#N/A	#N/A
ADAMTS19	#N/A	#N/A	#N/A				#N/A	#N/A	#N/A
ADAMTS2	#N/A	#N/A	#N/A				#N/A	#N/A	#N/A
ADAMTS20	#N/A	#N/A	#N/A				#N/A	#N/A	#N/A
ADAMTS3	#N/A	#N/A	#N/A				#N/A	#N/A	#N/A
ADAMTS4	#N/A	#N/A	Adamts4				#N/A	#N/A	#N/A
ADAMTS5	#N/A	#N/A	#N/A				#N/A	#N/A	#N/A
ADAMTS6	#N/A	#N/A	#N/A				#N/A	#N/A	#N/A
ADAMTS7	#N/A	#N/A	#N/A				#N/A	#N/A	#N/A
ADAMTS8	#N/A	#N/A	#N/A				Adamts8	Adamts8	Adamts8
ADAMTS9	#N/A	#N/A	#N/A				#N/A	#N/A	#N/A
ADAMTSL1	#N/A	#N/A	#N/A				#N/A	#N/A	#N/A
ADAMTSL2	#N/A	#N/A	#N/A				#N/A	#N/A	#N/A
ADAMTSL3	#N/A	#N/A	#N/A				#N/A	#N/A	#N/A
ADAMTSL4	#N/A	#N/A	#N/A				#N/A	#N/A	#N/A
ADAMTSL5	#N/A	#N/A	#N/A				#N/A	#N/A	#N/A
ADCK1	#N/A	#N/A	#N/A				#N/A	#N/A	#N/A
ADCYAP1	#N/A	#N/A	#N/A				#N/A	#N/A	#N/A
ADGRB1	#N/A	#N/A	#N/A				#N/A	#N/A	#N/A
ADGRE3	#N/A	#N/A	#N/A				#N/A	#N/A	#N/A
ADGRE5	#N/A	#N/A	#N/A				#N/A	#N/A	#N/A
ADGRF1	#N/A	#N/A	#N/A				#N/A	#N/A	#N/A
ADGRG1	#N/A	#N/A	#N/A				#N/A	#N/A	#N/A
ADIPOQ	#N/A	#N/A	#N/A				#N/A	#N/A	#N/A
ADM	#N/A	#N/A	#N/A				#N/A	#N/A	#N/A
ADM2	#N/A	#N/A	#N/A				#N/A	#N/A	#N/A
ADM5	#N/A	#N/A	#N/A				#N/A	#N/A	#N/A
AEBP1	#N/A	#N/A	#N/A				#N/A	#N/A	#N/A
AFM	#N/A	#N/A	#N/A				#N/A	#N/A	#N/A
AFP	#N/A	#N/A	#N/A				#N/A	#N/A	#N/A
AGER	#N/A	#N/A	Ager				#N/A	#N/A	#N/A
AGGF1	#N/A	#N/A	#N/A				#N/A	#N/A	#N/A
AGRN	#N/A	Agrn	#N/A				#N/A	#N/A	#N/A
AGRP	#N/A	#N/A	#N/A				#N/A	#N/A	#N/A
AGT	#N/A	#N/A	#N/A				#N/A	#N/A	#N/A
AHSG	#N/A	#N/A	#N/A				#N/A	#N/A	#N/A
AIMP1	#N/A	#N/A	#N/A				#N/A	#N/A	#N/A
AKR1B10	#N/A	#N/A	#N/A				#N/A	#N/A	#N/A
ALB	#N/A	#N/A	#N/A				#N/A	#N/A	#N/A
ALKAL1	#N/A	#N/A	#N/A				#N/A	#N/A	#N/A
ALKAL2	#N/A	#N/A	#N/A				#N/A	#N/A	#N/A
AMBN	#N/A	#N/A	#N/A				#N/A	#N/A	#N/A
AMBP	#N/A	Ambp	#N/A				#N/A	#N/A	#N/A
AMELX	#N/A	#N/A	#N/A				#N/A	#N/A	#N/A
AMELY	#N/A	#N/A	#N/A				#N/A	#N/A	#N/A
AMH	#N/A	#N/A	#N/A				#N/A	#N/A	#N/A
AMTN	#N/A	#N/A	#N/A				#N/A	#N/A	#N/A
AMY1A	#N/A	#N/A	#N/A				#N/A	#N/A	#N/A
AMY1B	#N/A	#N/A	#N/A				#N/A	#N/A	#N/A
AMY1C	#N/A	#N/A	#N/A				#N/A	#N/A	#N/A
AMY2A	#N/A	#N/A	#N/A				#N/A	#N/A	#N/A
AMY2B	#N/A	#N/A	#N/A				#N/A	#N/A	#N/A
ANG	#N/A	#N/A	#N/A				Ang	Ang	Ang
ANGPT1	#N/A	#N/A	#N/A				#N/A	#N/A	#N/A
ANGPT2	#N/A	#N/A	Angpt2				#N/A	#N/A	#N/A
ANGPT4	#N/A	#N/A	#N/A				#N/A	#N/A	#N/A
ANGPTL1	#N/A	#N/A	#N/A				#N/A	#N/A	#N/A
ANGPTL2	#N/A	#N/A	#N/A				#N/A	#N/A	#N/A
ANGPTL3	#N/A	#N/A	#N/A				#N/A	#N/A	#N/A
ANGPTL4	#N/A	#N/A	Angptl4				#N/A	#N/A	#N/A
ANGPTL5	#N/A	#N/A	#N/A				#N/A	#N/A	#N/A
ANGPTL6	#N/A	#N/A	#N/A				#N/A	#N/A	#N/A
ANGPTL7	#N/A	#N/A	#N/A				#N/A	#N/A	#N/A
ANGPTL8	#N/A	#N/A	#N/A				#N/A	#N/A	#N/A
ANKDD1A	#N/A	#N/A	#N/A				#N/A	#N/A	#N/A
ANOS1	#N/A	#N/A	#N/A				#N/A	#N/A	#N/A
ANXA1	Anxa1	Anxa1	Anxa1				#N/A	#N/A	#N/A
ANXA2	Anxa2	Anxa2	Anxa2				#N/A	#N/A	#N/A
AOAH	#N/A	#N/A	Aoah				#N/A	#N/A	#N/A
AOC1	#N/A	#N/A	#N/A				#N/A	#N/A	#N/A
AOC3	#N/A	#N/A	#N/A				#N/A	#N/A	#N/A
AP000790.4	#N/A	#N/A	#N/A				#N/A	#N/A	#N/A
AP002347.1	#N/A	#N/A	#N/A				#N/A	#N/A	#N/A
APCS	#N/A	#N/A	#N/A				#N/A	#N/A	#N/A
APELA	#N/A	#N/A	#N/A				#N/A	#N/A	#N/A
APLN	Apln	#N/A	Apln				#N/A	#N/A	#N/A
APOA1	#N/A	#N/A	#N/A				#N/A	#N/A	#N/A
APOA2	#N/A	#N/A	#N/A				#N/A	#N/A	#N/A
APOA4	#N/A	#N/A	#N/A				#N/A	#N/A	#N/A
APOA5	#N/A	#N/A	#N/A				Apoa5	Apoa5	Apoa5
APOB	#N/A	#N/A	#N/A				#N/A	#N/A	#N/A
APOC1	#N/A	#N/A	#N/A				#N/A	#N/A	Apoc1
APOC2	#N/A	#N/A	#N/A				#N/A	#N/A	#N/A
APOC3	#N/A	#N/A	#N/A				#N/A	#N/A	#N/A
APOC4	#N/A	#N/A	#N/A				#N/A	#N/A	#N/A
APOD	#N/A	#N/A	#N/A				#N/A	#N/A	Apod
APOE	#N/A	#N/A	#N/A				#N/A	#N/A	#N/A
APOF	#N/A	#N/A	#N/A				#N/A	Apof	Apof
APOH	#N/A	#N/A	#N/A				#N/A	#N/A	#N/A
APOL1	#N/A	#N/A	#N/A				#N/A	#N/A	#N/A
APOL4	#N/A	#N/A	#N/A				#N/A	#N/A	#N/A
APOM	#N/A	#N/A	#N/A				#N/A	#N/A	#N/A
APOO	#N/A	#N/A	#N/A				#N/A	#N/A	#N/A
ARSF	#N/A	#N/A	#N/A				#N/A	#N/A	#N/A
ARSI	#N/A	#N/A	#N/A				#N/A	#N/A	#N/A
ARSJ	#N/A	#N/A	#N/A				#N/A	#N/A	#N/A
ARSK	#N/A	#N/A	#N/A				#N/A	#N/A	#N/A
ART4	#N/A	#N/A	#N/A				#N/A	#N/A	#N/A
ART5	#N/A	#N/A	#N/A				#N/A	#N/A	#N/A
ARTN	#N/A	#N/A	#N/A				#N/A	#N/A	#N/A
ASIP	#N/A	#N/A	#N/A				#N/A	#N/A	#N/A
ASPN	#N/A	#N/A	#N/A				#N/A	Aspn	#N/A
ASTL	#N/A	#N/A	#N/A				#N/A	#N/A	#N/A
ATRN	#N/A	#N/A	#N/A				#N/A	#N/A	#N/A
AVP	#N/A	#N/A	#N/A				#N/A	#N/A	#N/A
AZGP1	#N/A	#N/A	#N/A				Azgp1	Azgp1	Azgp1
AZU1	#N/A	#N/A	#N/A				#N/A	#N/A	#N/A
B3GAT1	#N/A	#N/A	#N/A				#N/A	#N/A	#N/A
BCAN	#N/A	#N/A	#N/A				#N/A	#N/A	#N/A
BCHE	#N/A	#N/A	#N/A				#N/A	#N/A	#N/A
BDNF	#N/A	#N/A	#N/A				#N/A	#N/A	#N/A
BGLAP	#N/A	#N/A	#N/A				#N/A	#N/A	#N/A
BGN	#N/A	#N/A	#N/A				#N/A	#N/A	#N/A
BMP1	#N/A	#N/A	Bmp1				#N/A	#N/A	#N/A
BMP10	#N/A	#N/A	#N/A				#N/A	#N/A	#N/A
BMP15	#N/A	#N/A	#N/A				#N/A	#N/A	#N/A
BMP2	#N/A	#N/A	#N/A				#N/A	#N/A	#N/A
BMP3	#N/A	#N/A	#N/A				#N/A	#N/A	#N/A
BMP4	#N/A	#N/A	#N/A				#N/A	#N/A	#N/A
BMP5	#N/A	#N/A	#N/A				#N/A	#N/A	#N/A
BMP6	#N/A	#N/A	#N/A				#N/A	#N/A	#N/A
BMP7	#N/A	#N/A	#N/A				Bmp7	Bmp7	Bmp7
BMP8A	#N/A	#N/A	#N/A				#N/A	#N/A	#N/A
BMP8B	#N/A	#N/A	#N/A				#N/A	Bmp8b	Bmp8b
BMPER	#N/A	#N/A	#N/A				#N/A	#N/A	#N/A
BPI	#N/A	#N/A	#N/A				#N/A	#N/A	#N/A
BPIFA1	#N/A	#N/A	#N/A				#N/A	#N/A	#N/A
BPIFA2	#N/A	#N/A	#N/A				#N/A	#N/A	#N/A
BPIFA3	#N/A	#N/A	#N/A				#N/A	#N/A	#N/A
BPIFB1	#N/A	#N/A	#N/A				#N/A	#N/A	#N/A
BPIFB4	#N/A	#N/A	#N/A				#N/A	#N/A	#N/A
BPIFC	#N/A	#N/A	#N/A				#N/A	#N/A	#N/A
BRINP2	#N/A	#N/A	#N/A				#N/A	#N/A	#N/A
BRINP3	#N/A	#N/A	#N/A				#N/A	#N/A	#N/A
BSPH1	#N/A	#N/A	#N/A				#N/A	#N/A	#N/A
BTBD17	#N/A	#N/A	#N/A				#N/A	#N/A	#N/A
BTC	Btc	Btc	Btc				#N/A	#N/A	#N/A
BTD	#N/A	#N/A	#N/A				#N/A	#N/A	#N/A
BTN1A1	#N/A	#N/A	#N/A				#N/A	#N/A	#N/A
BX248415.1	#N/A	#N/A	#N/A				#N/A	#N/A	#N/A
C10orf95	#N/A	#N/A	#N/A				#N/A	#N/A	#N/A
C10orf99	#N/A	#N/A	#N/A				#N/A	#N/A	#N/A
C11orf45	#N/A	#N/A	#N/A				#N/A	#N/A	#N/A
C11orf94	#N/A	#N/A	#N/A				#N/A	#N/A	#N/A
C12orf49	#N/A	#N/A	#N/A				#N/A	#N/A	#N/A
C12orf73	#N/A	#N/A	#N/A				#N/A	#N/A	#N/A
C14orf93	#N/A	#N/A	#N/A				#N/A	#N/A	#N/A
C15orf61	#N/A	#N/A	#N/A				#N/A	#N/A	#N/A
C16orf89	#N/A	#N/A	#N/A				#N/A	#N/A	#N/A
C17orf67	#N/A	#N/A	#N/A				#N/A	#N/A	#N/A
C17orf99	#N/A	#N/A	#N/A				#N/A	#N/A	#N/A
C18orf54	#N/A	#N/A	#N/A				#N/A	#N/A	#N/A
C1orf54	#N/A	#N/A	#N/A				#N/A	#N/A	#N/A
C1orf56	#N/A	#N/A	#N/A				#N/A	#N/A	#N/A
C1QA	#N/A	#N/A	C1qa				#N/A	#N/A	#N/A
C1QB	#N/A	#N/A	C1qb				#N/A	#N/A	#N/A
C1QC	#N/A	#N/A	C1qc				#N/A	#N/A	#N/A
C1QL1	#N/A	#N/A	#N/A				#N/A	#N/A	#N/A
C1QL2	#N/A	#N/A	#N/A				#N/A	#N/A	#N/A
C1QL3	#N/A	#N/A	#N/A				#N/A	#N/A	#N/A
C1QL4	#N/A	#N/A	#N/A				#N/A	#N/A	#N/A
C1QTNF1	#N/A	#N/A	#N/A				#N/A	#N/A	#N/A
C1QTNF12	#N/A	#N/A	#N/A				#N/A	#N/A	#N/A
C1QTNF2	#N/A	#N/A	#N/A				#N/A	#N/A	#N/A
C1QTNF3	#N/A	#N/A	#N/A				#N/A	#N/A	#N/A
C1QTNF4	#N/A	#N/A	#N/A				#N/A	#N/A	C1qtnf4
C1QTNF5	#N/A	#N/A	#N/A				#N/A	#N/A	#N/A
C1QTNF6	#N/A	#N/A	C1qtnf6				#N/A	#N/A	#N/A
C1QTNF7	#N/A	#N/A	#N/A				#N/A	#N/A	#N/A
C1QTNF8	#N/A	#N/A	#N/A				#N/A	#N/A	#N/A
C1QTNF9	#N/A	#N/A	#N/A				#N/A	#N/A	#N/A
C1QTNF9B	#N/A	#N/A	#N/A				#N/A	#N/A	#N/A
C1R	#N/A	#N/A	#N/A				#N/A	#N/A	#N/A
C1RL	#N/A	#N/A	#N/A				C1rl	C1rl	#N/A
C1S	#N/A	#N/A	#N/A				#N/A	#N/A	#N/A
C2	#N/A	#N/A	C2				#N/A	#N/A	#N/A
C21orf62	#N/A	#N/A	#N/A				#N/A	#N/A	#N/A
C22orf15	#N/A	#N/A	#N/A				#N/A	#N/A	#N/A
C22orf46	#N/A	#N/A	#N/A				#N/A	#N/A	#N/A
C2orf40	#N/A	#N/A	#N/A				#N/A	#N/A	#N/A
C2orf66	#N/A	#N/A	#N/A				#N/A	#N/A	#N/A
C2orf69	#N/A	#N/A	#N/A				#N/A	#N/A	#N/A
C3	#N/A	#N/A	C3				#N/A	#N/A	#N/A
C3orf33	#N/A	#N/A	#N/A				#N/A	#N/A	#N/A
C3orf58	#N/A	#N/A	#N/A				#N/A	#N/A	#N/A
C4A	#N/A	#N/A	#N/A				#N/A	#N/A	#N/A
C4B	#N/A	#N/A	#N/A				#N/A	#N/A	#N/A
C4BPA	#N/A	#N/A	#N/A				#N/A	#N/A	#N/A
C4BPB	#N/A	#N/A	#N/A				#N/A	#N/A	#N/A
C4orf48	#N/A	#N/A	#N/A				#N/A	#N/A	#N/A
C5	#N/A	#N/A	#N/A				#N/A	#N/A	#N/A
C5orf38	#N/A	#N/A	#N/A				#N/A	#N/A	#N/A
C5orf46	#N/A	#N/A	#N/A				#N/A	#N/A	#N/A
C6	#N/A	#N/A	#N/A				#N/A	#N/A	#N/A
C6orf120	#N/A	#N/A	#N/A				#N/A	#N/A	#N/A
C6orf15	#N/A	#N/A	#N/A				#N/A	#N/A	#N/A
C6orf58	#N/A	#N/A	#N/A				#N/A	#N/A	#N/A
C7	#N/A	#N/A	#N/A				#N/A	#N/A	#N/A
C8A	#N/A	#N/A	#N/A				#N/A	#N/A	#N/A
C8B	#N/A	#N/A	#N/A				#N/A	#N/A	#N/A
C8G	#N/A	#N/A	#N/A				#N/A	#N/A	#N/A
C9	#N/A	#N/A	#N/A				#N/A	#N/A	#N/A
C9orf47	#N/A	#N/A	#N/A				#N/A	#N/A	#N/A
C9orf72	#N/A	#N/A	#N/A				#N/A	#N/A	#N/A
CA10	#N/A	#N/A	#N/A				#N/A	#N/A	#N/A
CA11	#N/A	#N/A	#N/A				#N/A	#N/A	#N/A
CA6	#N/A	#N/A	#N/A				#N/A	#N/A	#N/A
CALCA	#N/A	#N/A	Calca				#N/A	#N/A	#N/A
CALCB	#N/A	#N/A	#N/A				#N/A	#N/A	#N/A
CAMP	#N/A	#N/A	#N/A				#N/A	#N/A	#N/A
CARTPT	#N/A	#N/A	#N/A				#N/A	#N/A	#N/A
CATSPERG	#N/A	#N/A	#N/A				#N/A	#N/A	#N/A
CBLN1	Cbln1	Cbln1	#N/A				#N/A	#N/A	#N/A
CBLN2	#N/A	#N/A	#N/A				#N/A	#N/A	#N/A
CBLN3	#N/A	#N/A	#N/A				#N/A	#N/A	#N/A
CBLN4	#N/A	#N/A	#N/A				#N/A	#N/A	#N/A
CCBE1	#N/A	#N/A	#N/A				#N/A	#N/A	#N/A
CCDC112	#N/A	#N/A	#N/A				#N/A	#N/A	#N/A
CCDC126	#N/A	#N/A	#N/A				Ccdc126	Ccdc126	Ccdc126
CCDC134	#N/A	#N/A	#N/A				#N/A	#N/A	#N/A
CCDC3	#N/A	#N/A	#N/A				#N/A	#N/A	#N/A
CCDC70	#N/A	#N/A	#N/A				#N/A	#N/A	#N/A
CCDC80	#N/A	#N/A	#N/A				#N/A	#N/A	#N/A
CCER2	#N/A	#N/A	#N/A				#N/A	#N/A	#N/A
CCK	#N/A	#N/A	#N/A				#N/A	#N/A	#N/A
CCL1	#N/A	#N/A	#N/A				#N/A	#N/A	#N/A
CCL11	#N/A	#N/A	#N/A				Ccl11	Ccl11	Ccl11
CCL13	#N/A	#N/A	#N/A				#N/A	#N/A	#N/A
CCL14	#N/A	#N/A	#N/A				#N/A	#N/A	#N/A
CCL15	#N/A	#N/A	#N/A				#N/A	#N/A	#N/A
CCL16	#N/A	#N/A	#N/A				#N/A	#N/A	#N/A
CCL17	#N/A	#N/A	Ccl17				#N/A	#N/A	#N/A
CCL18	#N/A	#N/A	#N/A				#N/A	#N/A	#N/A
CCL19	#N/A	#N/A	#N/A				#N/A	#N/A	#N/A
CCL2	#N/A	#N/A	Ccl2				#N/A	#N/A	#N/A
CCL20	#N/A	#N/A	#N/A				#N/A	#N/A	#N/A
CCL21	#N/A	#N/A	#N/A				#N/A	#N/A	#N/A
CCL22	#N/A	#N/A	Ccl22				#N/A	#N/A	#N/A
CCL23	#N/A	#N/A	#N/A				#N/A	#N/A	#N/A
CCL24	#N/A	#N/A	#N/A				#N/A	Ccl24	#N/A
CCL25	#N/A	#N/A	#N/A				#N/A	#N/A	#N/A
CCL26	#N/A	#N/A	#N/A				#N/A	#N/A	#N/A
CCL27	#N/A	#N/A	#N/A				#N/A	#N/A	#N/A
CCL28	Ccl28	Ccl28	Ccl28				#N/A	#N/A	#N/A
CCL3	#N/A	Ccl3	Ccl3				#N/A	#N/A	#N/A
CCL3L1	#N/A	#N/A	#N/A				#N/A	#N/A	#N/A
CCL4	#N/A	#N/A	Ccl4				#N/A	#N/A	#N/A
CCL4L2	#N/A	#N/A	#N/A				#N/A	#N/A	#N/A
CCL5	#N/A	#N/A	Ccl5				#N/A	#N/A	#N/A
CCL7	#N/A	#N/A	Ccl7				#N/A	#N/A	#N/A
CCL8	#N/A	#N/A	Ccl8				#N/A	#N/A	#N/A
CD14	Cd14	Cd14	Cd14				#N/A	#N/A	#N/A
CD163	#N/A	#N/A	#N/A				#N/A	#N/A	Cd163
CD40	#N/A	#N/A	#N/A				#N/A	#N/A	#N/A
CD40LG	#N/A	#N/A	#N/A				#N/A	#N/A	#N/A
CD44	#N/A	Cd44	Cd44				#N/A	#N/A	#N/A
CD55	#N/A	#N/A	#N/A				#N/A	#N/A	#N/A
CD5L	#N/A	#N/A	#N/A				#N/A	#N/A	#N/A
CD6	#N/A	#N/A	#N/A				#N/A	#N/A	#N/A
CDCP2	#N/A	#N/A	#N/A				#N/A	#N/A	#N/A
CDNF	#N/A	#N/A	#N/A				#N/A	#N/A	#N/A
CDSN	#N/A	#N/A	#N/A				#N/A	#N/A	#N/A
CEACAM16	#N/A	#N/A	#N/A				#N/A	#N/A	#N/A
CEL	#N/A	#N/A	#N/A				#N/A	#N/A	#N/A
CELA1	#N/A	#N/A	#N/A				#N/A	#N/A	#N/A
CELA2A	#N/A	#N/A	#N/A				#N/A	#N/A	#N/A
CELA2B	#N/A	#N/A	#N/A				#N/A	#N/A	#N/A
CELA3A	#N/A	#N/A	#N/A				#N/A	#N/A	#N/A
CELA3B	#N/A	#N/A	#N/A				#N/A	#N/A	#N/A
CEMIP	#N/A	#N/A	#N/A				#N/A	#N/A	#N/A
CER1	#N/A	#N/A	#N/A				#N/A	#N/A	#N/A
CES4A	#N/A	#N/A	#N/A				#N/A	#N/A	#N/A
CES5A	#N/A	#N/A	#N/A				#N/A	#N/A	#N/A
CETP	#N/A	#N/A	#N/A				#N/A	#N/A	#N/A
CFB	#N/A	Cfb	#N/A				#N/A	#N/A	#N/A
CFC1	#N/A	#N/A	#N/A				#N/A	#N/A	#N/A
CFC1B	#N/A	#N/A	#N/A				#N/A	#N/A	#N/A
CFD	#N/A	#N/A	#N/A				#N/A	#N/A	#N/A
CFH	#N/A	#N/A	#N/A				#N/A	#N/A	#N/A
CFHR1	#N/A	#N/A	#N/A				#N/A	#N/A	#N/A
CFHR2	#N/A	#N/A	#N/A				#N/A	#N/A	#N/A
CFHR3	#N/A	#N/A	#N/A				#N/A	#N/A	#N/A
CFHR4	#N/A	#N/A	#N/A				#N/A	#N/A	#N/A
CFHR5	#N/A	#N/A	#N/A				#N/A	#N/A	#N/A
CFI	Cfi	Cfi	Cfi				#N/A	#N/A	#N/A
CFP	#N/A	#N/A	#N/A				#N/A	#N/A	#N/A
CGA	#N/A	#N/A	#N/A				#N/A	#N/A	#N/A
CGB1	#N/A	#N/A	#N/A				#N/A	#N/A	#N/A
CGB2	#N/A	#N/A	#N/A				#N/A	#N/A	#N/A
CGB3	#N/A	#N/A	#N/A				#N/A	#N/A	#N/A
CGB5	#N/A	#N/A	#N/A				#N/A	#N/A	#N/A
CGB7	#N/A	#N/A	#N/A				#N/A	#N/A	#N/A
CGB8	#N/A	#N/A	#N/A				#N/A	#N/A	#N/A
CGREF1	#N/A	#N/A	#N/A				Cgref1	Cgref1	Cgref1
CHAD	Chad	Chad	#N/A				#N/A	#N/A	#N/A
CHADL	#N/A	#N/A	#N/A				#N/A	#N/A	#N/A
CHI3L1	#N/A	#N/A	#N/A				#N/A	#N/A	#N/A
CHI3L2	#N/A	#N/A	#N/A				#N/A	#N/A	#N/A
CHIT1	Chit1	Chit1	#N/A				#N/A	#N/A	#N/A
CHRD	#N/A	#N/A	#N/A				#N/A	#N/A	#N/A
CHRDL1	#N/A	#N/A	#N/A				#N/A	#N/A	#N/A
CHRDL2	#N/A	#N/A	#N/A				Chrdl2	Chrdl2	#N/A
CHSY1	#N/A	#N/A	Chsy1				#N/A	#N/A	#N/A
CILP	#N/A	#N/A	#N/A				#N/A	#N/A	#N/A
CILP2	#N/A	#N/A	#N/A				Cilp2	Cilp2	Cilp2
CKLF	#N/A	#N/A	#N/A				#N/A	#N/A	#N/A
CLCA1	#N/A	#N/A	Clca1				#N/A	#N/A	#N/A
CLCF1	#N/A	#N/A	#N/A				#N/A	#N/A	#N/A
CLEC11A	#N/A	#N/A	#N/A				#N/A	#N/A	#N/A
CLEC18A	#N/A	#N/A	#N/A				#N/A	Clec18a	Clec18a
CLEC18B	#N/A	#N/A	#N/A				#N/A	#N/A	#N/A
CLEC18C	#N/A	#N/A	#N/A				#N/A	#N/A	#N/A
CLEC19A	#N/A	#N/A	#N/A				#N/A	#N/A	#N/A
CLEC3A	#N/A	#N/A	#N/A				#N/A	#N/A	#N/A
CLEC3B	#N/A	#N/A	#N/A				#N/A	#N/A	Clec3b
CLPS	#N/A	#N/A	#N/A				#N/A	#N/A	#N/A
CLPSL1	#N/A	#N/A	#N/A				#N/A	#N/A	#N/A
CLPSL2	#N/A	#N/A	#N/A				#N/A	#N/A	#N/A
CLU	Clu	Clu	Clu				#N/A	#N/A	#N/A
CLUL1	#N/A	#N/A	#N/A				#N/A	#N/A	#N/A
CMA1	#N/A	#N/A	#N/A				#N/A	Cma1	Cma1
CNBD1	#N/A	#N/A	#N/A				#N/A	#N/A	#N/A
CNDP1	#N/A	#N/A	#N/A				#N/A	#N/A	#N/A
CNMD	#N/A	#N/A	#N/A				#N/A	#N/A	#N/A
CNTN2	#N/A	#N/A	#N/A				#N/A	#N/A	#N/A
COCH	#N/A	#N/A	#N/A				Coch	Coch	Coch
COL10A1	#N/A	#N/A	#N/A				#N/A	#N/A	#N/A
COL11A1	#N/A	#N/A	#N/A				#N/A	#N/A	#N/A
COL11A2	Col11a2	Col11a2	Col11a2				#N/A	#N/A	#N/A
COL12A1	#N/A	#N/A	#N/A				#N/A	#N/A	#N/A
COL14A1	#N/A	#N/A	#N/A				#N/A	#N/A	#N/A
COL15A1	#N/A	#N/A	#N/A				#N/A	#N/A	#N/A
COL16A1	#N/A	#N/A	#N/A				#N/A	#N/A	#N/A
COL17A1	#N/A	#N/A	#N/A				#N/A	#N/A	#N/A
COL18A1	#N/A	#N/A	#N/A				#N/A	#N/A	#N/A
COL19A1	#N/A	#N/A	#N/A				#N/A	#N/A	#N/A
COL1A1	#N/A	#N/A	Col1a1				#N/A	#N/A	#N/A
COL1A2	#N/A	#N/A	#N/A				#N/A	#N/A	#N/A
COL20A1	#N/A	#N/A	#N/A				#N/A	#N/A	#N/A
COL21A1	#N/A	#N/A	#N/A				#N/A	#N/A	#N/A
COL22A1	#N/A	#N/A	#N/A				#N/A	#N/A	#N/A
COL24A1	#N/A	#N/A	#N/A				#N/A	#N/A	#N/A
COL26A1	#N/A	#N/A	#N/A				#N/A	#N/A	#N/A
COL27A1	#N/A	#N/A	#N/A				#N/A	#N/A	#N/A
COL28A1	#N/A	#N/A	#N/A				#N/A	#N/A	Col28a1
COL2A1	#N/A	#N/A	#N/A				#N/A	#N/A	#N/A
COL3A1	#N/A	#N/A	#N/A				#N/A	#N/A	#N/A
COL4A1	#N/A	#N/A	#N/A				#N/A	#N/A	#N/A
COL4A2	#N/A	#N/A	#N/A				#N/A	#N/A	#N/A
COL4A3	#N/A	#N/A	#N/A				#N/A	#N/A	#N/A
COL4A4	#N/A	#N/A	#N/A				#N/A	#N/A	#N/A
COL4A5	#N/A	#N/A	#N/A				#N/A	#N/A	#N/A
COL4A6	#N/A	#N/A	#N/A				Col4a6	Col4a6	Col4a6
COL5A1	#N/A	#N/A	#N/A				#N/A	#N/A	#N/A
COL5A2	#N/A	#N/A	#N/A				#N/A	#N/A	#N/A
COL5A3	#N/A	#N/A	#N/A				#N/A	#N/A	#N/A
COL6A1	#N/A	#N/A	#N/A				#N/A	#N/A	#N/A
COL6A2	#N/A	#N/A	#N/A				#N/A	#N/A	#N/A
COL6A3	#N/A	#N/A	#N/A				#N/A	#N/A	#N/A
COL6A5	#N/A	#N/A	#N/A				#N/A	#N/A	#N/A
COL6A6	#N/A	#N/A	#N/A				Col6a6	Col6a6	Col6a6
COL7A1	#N/A	#N/A	#N/A				#N/A	#N/A	#N/A
COL8A1	#N/A	#N/A	#N/A				#N/A	#N/A	#N/A
COL8A2	#N/A	#N/A	#N/A				#N/A	#N/A	#N/A
COL9A1	#N/A	#N/A	#N/A				#N/A	#N/A	#N/A
COL9A2	#N/A	#N/A	#N/A				Col9a2	Col9a2	#N/A
COL9A3	#N/A	#N/A	Col9a3				#N/A	#N/A	#N/A
COLEC10	#N/A	#N/A	#N/A				#N/A	#N/A	#N/A
COLEC11	#N/A	#N/A	#N/A				#N/A	#N/A	#N/A
COLQ	#N/A	#N/A	#N/A				#N/A	#N/A	#N/A
COMP	#N/A	#N/A	#N/A				#N/A	#N/A	#N/A
COPA	#N/A	#N/A	#N/A				#N/A	#N/A	#N/A
CORT	#N/A	#N/A	#N/A				#N/A	#N/A	#N/A
CP	#N/A	#N/A	#N/A				#N/A	#N/A	#N/A
CPA1	#N/A	#N/A	#N/A				#N/A	#N/A	#N/A
CPA2	#N/A	#N/A	#N/A				#N/A	#N/A	#N/A
CPA3	#N/A	#N/A	#N/A				Cpa3	Cpa3	Cpa3
CPA4	#N/A	#N/A	#N/A				#N/A	#N/A	#N/A
CPA5	#N/A	#N/A	#N/A				#N/A	#N/A	#N/A
CPA6	#N/A	#N/A	#N/A				#N/A	#N/A	#N/A
CPAMD8	#N/A	#N/A	#N/A				#N/A	#N/A	#N/A
CPB1	#N/A	#N/A	#N/A				#N/A	#N/A	#N/A
CPB2	#N/A	#N/A	#N/A				#N/A	#N/A	#N/A
CPN1	#N/A	#N/A	#N/A				#N/A	#N/A	#N/A
CPN2	#N/A	#N/A	#N/A				#N/A	#N/A	#N/A
CPQ	#N/A	#N/A	#N/A				#N/A	#N/A	#N/A
CPXM1	#N/A	#N/A	#N/A				#N/A	#N/A	#N/A
CPXM2	#N/A	#N/A	#N/A				#N/A	#N/A	#N/A
CPZ	#N/A	#N/A	#N/A				#N/A	#N/A	#N/A
CREG1	#N/A	#N/A	#N/A				#N/A	#N/A	#N/A
CREG2	#N/A	#N/A	#N/A				Creg2	Creg2	Creg2
CRELD2	#N/A	#N/A	#N/A				#N/A	Creld2	#N/A
CRH	#N/A	#N/A	#N/A				#N/A	#N/A	#N/A
CRHBP	#N/A	#N/A	#N/A				#N/A	#N/A	#N/A
CRHR2	#N/A	#N/A	#N/A				#N/A	#N/A	#N/A
CRISP1	#N/A	#N/A	#N/A				#N/A	#N/A	#N/A
CRISP2	#N/A	#N/A	#N/A				#N/A	#N/A	#N/A
CRISP3	#N/A	#N/A	#N/A				#N/A	#N/A	#N/A
CRISPLD1	#N/A	#N/A	#N/A				#N/A	#N/A	#N/A
CRISPLD2	#N/A	#N/A	#N/A				#N/A	#N/A	#N/A
CRLF1	#N/A	#N/A	#N/A				#N/A	#N/A	#N/A
CRP	#N/A	#N/A	#N/A				#N/A	#N/A	#N/A
CRTAC1	#N/A	#N/A	#N/A				#N/A	#N/A	#N/A
CRTAP	#N/A	#N/A	#N/A				#N/A	#N/A	#N/A
CSF1	#N/A	#N/A	#N/A				#N/A	#N/A	#N/A
CSF2	#N/A	#N/A	#N/A				#N/A	#N/A	#N/A
CSF2RA	#N/A	#N/A	#N/A				#N/A	#N/A	#N/A
CSF3	#N/A	#N/A	#N/A				#N/A	#N/A	#N/A
CSH1	#N/A	#N/A	#N/A				#N/A	#N/A	#N/A
CSH2	#N/A	#N/A	#N/A				#N/A	#N/A	#N/A
CSHL1	#N/A	#N/A	#N/A				#N/A	#N/A	#N/A
CSN1S1	#N/A	#N/A	#N/A				#N/A	#N/A	#N/A
CSN2	#N/A	#N/A	#N/A				#N/A	#N/A	#N/A
CSN3	#N/A	#N/A	#N/A				#N/A	#N/A	#N/A
CST1	#N/A	#N/A	#N/A				#N/A	#N/A	#N/A
CST11	#N/A	#N/A	#N/A				#N/A	#N/A	#N/A
CST2	#N/A	#N/A	#N/A				#N/A	#N/A	#N/A
CST3	#N/A	#N/A	#N/A				#N/A	#N/A	#N/A
CST4	#N/A	#N/A	#N/A				#N/A	#N/A	#N/A
CST5	#N/A	#N/A	#N/A				#N/A	#N/A	#N/A
CST6	#N/A	#N/A	#N/A				#N/A	#N/A	#N/A
CST7	#N/A	#N/A	Cst7				#N/A	#N/A	#N/A
CST8	#N/A	#N/A	#N/A				#N/A	#N/A	#N/A
CST9	#N/A	#N/A	#N/A				#N/A	#N/A	#N/A
CST9L	#N/A	#N/A	#N/A				#N/A	#N/A	#N/A
CSTL1	#N/A	#N/A	#N/A				#N/A	#N/A	#N/A
CT55	#N/A	#N/A	#N/A				#N/A	#N/A	#N/A
CTF1	#N/A	#N/A	#N/A				#N/A	#N/A	#N/A
CTGF	#N/A	#N/A	#N/A				#N/A	#N/A	#N/A
CTHRC1	#N/A	#N/A	Cthrc1				#N/A	#N/A	#N/A
CTRB1	#N/A	#N/A	#N/A				#N/A	#N/A	#N/A
CTRB2	#N/A	#N/A	#N/A				#N/A	#N/A	#N/A
CTRC	#N/A	#N/A	#N/A				#N/A	#N/A	#N/A
CTRL	#N/A	#N/A	#N/A				#N/A	#N/A	#N/A
CTSB	#N/A	#N/A	Ctsb				#N/A	#N/A	#N/A
CTSD	#N/A	#N/A	#N/A				#N/A	#N/A	#N/A
CTSW	#N/A	Ctsw	Ctsw				#N/A	#N/A	#N/A
CUTA	#N/A	#N/A	#N/A				#N/A	#N/A	#N/A
CX3CL1	Cx3cl1	Cx3cl1	#N/A				#N/A	#N/A	#N/A
CXCL1	Cxcl1	Cxcl1	Cxcl1				#N/A	#N/A	#N/A
CXCL10	#N/A	#N/A	#N/A				#N/A	#N/A	#N/A
CXCL11	#N/A	Cxcl11	#N/A				#N/A	#N/A	#N/A
CXCL12	#N/A	#N/A	#N/A				#N/A	#N/A	#N/A
CXCL13	#N/A	#N/A	#N/A				#N/A	#N/A	Cxcl13
CXCL14	#N/A	#N/A	#N/A				#N/A	#N/A	#N/A
CXCL16	Cxcl16	Cxcl16	Cxcl16				#N/A	#N/A	#N/A
CXCL17	Cxcl17	Cxcl17	#N/A				#N/A	#N/A	#N/A
CXCL2	Cxcl2	Cxcl2	Cxcl2				#N/A	#N/A	#N/A
CXCL3	Cxcl3	Cxcl3	Cxcl3				#N/A	#N/A	#N/A
CXCL5	Cxcl5	Cxcl5	Cxcl5				#N/A	#N/A	#N/A
CXCL6	#N/A	#N/A	#N/A				#N/A	#N/A	#N/A
CXCL8	#N/A	#N/A	#N/A				#N/A	#N/A	#N/A
CXCL9	#N/A	#N/A	#N/A				#N/A	#N/A	#N/A
CXorf36	#N/A	#N/A	#N/A				#N/A	#N/A	#N/A
CYB5D2	#N/A	#N/A	#N/A				#N/A	#N/A	#N/A
CYR61	#N/A	#N/A	Cyr61				#N/A	#N/A	#N/A
CYTL1	#N/A	#N/A	#N/A				Cytl1	Cytl1	Cytl1
DAND5	#N/A	#N/A	#N/A				#N/A	#N/A	#N/A
DCD	#N/A	#N/A	#N/A				#N/A	#N/A	#N/A
DCN	#N/A	#N/A	#N/A				#N/A	#N/A	#N/A
DEFA4	#N/A	#N/A	#N/A				#N/A	#N/A	#N/A
DEFA5	#N/A	#N/A	#N/A				#N/A	#N/A	#N/A
DEFA6	#N/A	#N/A	#N/A				#N/A	#N/A	#N/A
DEFB1	#N/A	#N/A	#N/A				Defb1	Defb1	Defb1
DEFB103A	#N/A	#N/A	#N/A				#N/A	#N/A	#N/A
DEFB103B	#N/A	#N/A	#N/A				#N/A	#N/A	#N/A
DEFB104A	#N/A	#N/A	#N/A				#N/A	#N/A	#N/A
DEFB104B	#N/A	#N/A	#N/A				#N/A	#N/A	#N/A
DEFB105A	#N/A	#N/A	#N/A				#N/A	#N/A	#N/A
DEFB105B	#N/A	#N/A	#N/A				#N/A	#N/A	#N/A
DEFB106A	#N/A	#N/A	#N/A				#N/A	#N/A	#N/A
DEFB106B	#N/A	#N/A	#N/A				#N/A	#N/A	#N/A
DEFB107A	#N/A	#N/A	#N/A				#N/A	#N/A	#N/A
DEFB107B	#N/A	#N/A	#N/A				#N/A	#N/A	#N/A
DEFB108B	#N/A	#N/A	#N/A				#N/A	#N/A	#N/A
DEFB110	#N/A	#N/A	#N/A				#N/A	#N/A	#N/A
DEFB112	#N/A	#N/A	#N/A				#N/A	#N/A	#N/A
DEFB113	#N/A	#N/A	#N/A				#N/A	#N/A	#N/A
DEFB114	#N/A	#N/A	#N/A				#N/A	#N/A	#N/A
DEFB115	#N/A	#N/A	#N/A				#N/A	#N/A	#N/A
DEFB116	#N/A	#N/A	#N/A				#N/A	#N/A	#N/A
DEFB118	#N/A	#N/A	#N/A				#N/A	#N/A	#N/A
DEFB119	#N/A	#N/A	#N/A				#N/A	#N/A	#N/A
DEFB121	#N/A	#N/A	#N/A				#N/A	#N/A	#N/A
DEFB123	#N/A	#N/A	#N/A				#N/A	#N/A	#N/A
DEFB124	#N/A	#N/A	#N/A				#N/A	#N/A	#N/A
DEFB125	#N/A	#N/A	#N/A				#N/A	#N/A	#N/A
DEFB126	#N/A	#N/A	#N/A				#N/A	#N/A	#N/A
DEFB127	#N/A	#N/A	#N/A				#N/A	#N/A	#N/A
DEFB128	#N/A	#N/A	#N/A				#N/A	#N/A	#N/A
DEFB129	#N/A	#N/A	#N/A				#N/A	#N/A	#N/A
DEFB130A	#N/A	#N/A	#N/A				#N/A	#N/A	#N/A
DEFB130B	#N/A	#N/A	#N/A				#N/A	#N/A	#N/A
DEFB131A	#N/A	#N/A	#N/A				#N/A	#N/A	#N/A
DEFB131B	#N/A	#N/A	#N/A				#N/A	#N/A	#N/A
DEFB132	#N/A	#N/A	#N/A				#N/A	#N/A	#N/A
DEFB133	#N/A	#N/A	#N/A				#N/A	#N/A	#N/A
DEFB134	#N/A	#N/A	#N/A				#N/A	#N/A	#N/A
DEFB135	#N/A	#N/A	#N/A				#N/A	#N/A	#N/A
DEFB136	#N/A	#N/A	#N/A				#N/A	#N/A	#N/A
DEFB4A	#N/A	#N/A	#N/A				#N/A	#N/A	#N/A
DEFB4B	#N/A	#N/A	#N/A				#N/A	#N/A	#N/A
DHH	#N/A	#N/A	#N/A				#N/A	#N/A	#N/A
DHRS13	#N/A	#N/A	#N/A				#N/A	#N/A	#N/A
DHRS4L2	#N/A	#N/A	#N/A				#N/A	#N/A	#N/A
DHRS7C	#N/A	#N/A	#N/A				#N/A	#N/A	#N/A
DHRSX	#N/A	#N/A	#N/A				#N/A	#N/A	#N/A
DKK1	#N/A	#N/A	#N/A				#N/A	#N/A	#N/A
DKK2	#N/A	#N/A	#N/A				#N/A	#N/A	#N/A
DKK3	#N/A	#N/A	Dkk3				#N/A	#N/A	#N/A
DKK4	#N/A	#N/A	#N/A				#N/A	#N/A	#N/A
DKKL1	#N/A	#N/A	#N/A				Dkkl1	Dkkl1	Dkkl1
DMBT1	Dmbt1	Dmbt1	Dmbt1				#N/A	#N/A	#N/A
DMKN	#N/A	#N/A	Dmkn				#N/A	#N/A	#N/A
DMP1	#N/A	#N/A	#N/A				#N/A	#N/A	#N/A
DNASE1	#N/A	#N/A	#N/A				#N/A	#N/A	#N/A
DNASE1L2	Dnase1l2	Dnase1l2	#N/A				#N/A	#N/A	#N/A
DNASE1L3	#N/A	#N/A	#N/A				#N/A	#N/A	#N/A
DPP4	#N/A	#N/A	#N/A				#N/A	#N/A	#N/A
DPT	#N/A	#N/A	#N/A				#N/A	#N/A	#N/A
DRAXIN	#N/A	#N/A	Draxin				#N/A	#N/A	#N/A
DSPP	#N/A	#N/A	#N/A				#N/A	#N/A	#N/A
EBI3	#N/A	#N/A	Ebi3				#N/A	#N/A	#N/A
ECM1	#N/A	#N/A	#N/A				#N/A	#N/A	#N/A
ECM2	#N/A	#N/A	#N/A				#N/A	Ecm2	#N/A
EDDM3A	#N/A	#N/A	#N/A				#N/A	#N/A	#N/A
EDDM3B	#N/A	#N/A	#N/A				#N/A	#N/A	#N/A
EDIL3	#N/A	#N/A	#N/A				#N/A	#N/A	#N/A
EDN1	Edn1	Edn1	Edn1				#N/A	#N/A	#N/A
EDN2	#N/A	#N/A	#N/A				#N/A	#N/A	Edn2
EDN3	#N/A	#N/A	#N/A				#N/A	#N/A	Edn3
EFEMP1	#N/A	#N/A	#N/A				#N/A	#N/A	#N/A
EFEMP2	#N/A	#N/A	#N/A				#N/A	#N/A	#N/A
EFNA1	#N/A	#N/A	#N/A				#N/A	#N/A	#N/A
EFNA4	#N/A	#N/A	#N/A				#N/A	#N/A	#N/A
EGFL6	#N/A	#N/A	#N/A				Egfl6	#N/A	#N/A
EGFL7	#N/A	#N/A	#N/A				#N/A	#N/A	#N/A
EGFL8	#N/A	#N/A	#N/A				#N/A	#N/A	#N/A
EGFLAM	#N/A	#N/A	#N/A				#N/A	#N/A	#N/A
EGFR	#N/A	#N/A	#N/A				#N/A	#N/A	#N/A
ELANE	#N/A	#N/A	#N/A				#N/A	#N/A	#N/A
ELN	#N/A	#N/A	#N/A				#N/A	#N/A	#N/A
ELSPBP1	#N/A	#N/A	#N/A				#N/A	#N/A	#N/A
EMC10	#N/A	#N/A	#N/A				#N/A	#N/A	#N/A
EMID1	#N/A	#N/A	#N/A				#N/A	#N/A	#N/A
EMILIN1	#N/A	#N/A	#N/A				#N/A	#N/A	#N/A
EMILIN2	#N/A	#N/A	#N/A				#N/A	#N/A	#N/A
EMILIN3	#N/A	#N/A	#N/A				#N/A	#N/A	#N/A
ENAM	#N/A	#N/A	#N/A				#N/A	#N/A	#N/A
ENDOD1	#N/A	#N/A	#N/A				#N/A	#N/A	#N/A
ENDOU	#N/A	#N/A	#N/A				#N/A	#N/A	#N/A
ENHO	#N/A	#N/A	#N/A				Enho	Enho	Enho
ENPP1	#N/A	#N/A	#N/A				#N/A	#N/A	#N/A
ENPP3	#N/A	#N/A	#N/A				#N/A	#N/A	#N/A
ENTPD5	#N/A	#N/A	#N/A				#N/A	#N/A	#N/A
ENTPD6	#N/A	#N/A	#N/A				#N/A	#N/A	#N/A
EPGN	#N/A	#N/A	#N/A				#N/A	#N/A	#N/A
EPO	#N/A	#N/A	#N/A				#N/A	#N/A	#N/A
EPPIN	#N/A	#N/A	#N/A				#N/A	#N/A	#N/A
EPPIN-WFDC6	#N/A	#N/A	#N/A				#N/A	#N/A	#N/A
EPYC	#N/A	#N/A	#N/A				#N/A	#N/A	#N/A
ERAP1	#N/A	#N/A	#N/A				#N/A	#N/A	#N/A
ERAP2	#N/A	#N/A	#N/A				#N/A	#N/A	#N/A
ERBB3	#N/A	#N/A	#N/A				#N/A	#N/A	#N/A
EREG	#N/A	#N/A	#N/A				#N/A	#N/A	#N/A
ERFE	#N/A	#N/A	#N/A				#N/A	#N/A	#N/A
ERVMER34-1	#N/A	#N/A	#N/A				#N/A	#N/A	#N/A
ESM1	#N/A	#N/A	Esm1				#N/A	#N/A	#N/A
EYS	#N/A	#N/A	#N/A				#N/A	#N/A	#N/A
F10	#N/A	#N/A	#N/A				#N/A	#N/A	#N/A
F11	#N/A	#N/A	#N/A				#N/A	#N/A	#N/A
F12	#N/A	#N/A	#N/A				#N/A	#N/A	#N/A
F13A1	#N/A	#N/A	#N/A				#N/A	#N/A	#N/A
F13B	#N/A	#N/A	#N/A				#N/A	#N/A	#N/A
F2	#N/A	#N/A	#N/A				#N/A	#N/A	#N/A
F3	F3	F3	F3				#N/A	#N/A	#N/A
F5	F5	F5	#N/A				#N/A	#N/A	#N/A
F7	#N/A	#N/A	#N/A				#N/A	#N/A	#N/A
F8	#N/A	#N/A	#N/A				#N/A	#N/A	#N/A
F9	#N/A	#N/A	#N/A				#N/A	#N/A	#N/A
FAM131A	#N/A	#N/A	#N/A				#N/A	#N/A	#N/A
FAM172A	#N/A	#N/A	#N/A				#N/A	#N/A	#N/A
FAM177A1	#N/A	#N/A	#N/A				#N/A	#N/A	#N/A
FAM180A	#N/A	#N/A	#N/A				#N/A	#N/A	#N/A
FAM198A	#N/A	#N/A	#N/A				#N/A	#N/A	#N/A
FAM19A1	#N/A	#N/A	#N/A				#N/A	#N/A	#N/A
FAM19A3	#N/A	#N/A	#N/A				#N/A	#N/A	#N/A
FAM19A4	#N/A	#N/A	#N/A				#N/A	#N/A	#N/A
FAM19A5	#N/A	#N/A	#N/A				Fam19a5	Fam19a5	Fam19a5
FAM20A	#N/A	#N/A	#N/A				#N/A	#N/A	#N/A
FAM20C	#N/A	#N/A	#N/A				#N/A	#N/A	#N/A
FAM24A	#N/A	#N/A	#N/A				#N/A	#N/A	#N/A
FAM3A	#N/A	#N/A	#N/A				#N/A	#N/A	#N/A
FAM3B	Fam3b	Fam3b	#N/A				#N/A	#N/A	#N/A
FAM3C	#N/A	#N/A	#N/A				#N/A	#N/A	#N/A
FAM3D	#N/A	#N/A	#N/A				#N/A	#N/A	#N/A
FAM46B	#N/A	#N/A	#N/A				#N/A	#N/A	#N/A
FAP	#N/A	#N/A	#N/A				#N/A	#N/A	#N/A
FAS	#N/A	#N/A	#N/A				#N/A	#N/A	Fas
FASLG	#N/A	#N/A	#N/A				#N/A	#N/A	#N/A
FBLN1	#N/A	#N/A	#N/A				#N/A	#N/A	#N/A
FBLN2	#N/A	#N/A	#N/A				#N/A	#N/A	#N/A
FBLN5	#N/A	#N/A	#N/A				#N/A	#N/A	#N/A
FBLN7	#N/A	#N/A	#N/A				#N/A	#N/A	#N/A
FBN1	#N/A	#N/A	#N/A				#N/A	#N/A	#N/A
FBN2	#N/A	#N/A	#N/A				#N/A	#N/A	#N/A
FBN3	#N/A	#N/A	#N/A				#N/A	#N/A	#N/A
FCER2	#N/A	#N/A	#N/A				#N/A	#N/A	#N/A
FCGR3A	#N/A	#N/A	#N/A				#N/A	#N/A	#N/A
FCGR3B	#N/A	#N/A	#N/A				#N/A	#N/A	#N/A
FCMR	#N/A	#N/A	#N/A				#N/A	#N/A	#N/A
FCN1	#N/A	#N/A	#N/A				#N/A	#N/A	#N/A
FCN2	#N/A	#N/A	#N/A				#N/A	#N/A	#N/A
FCN3	#N/A	#N/A	#N/A				#N/A	#N/A	#N/A
FCRL5	#N/A	#N/A	#N/A				#N/A	#N/A	#N/A
FDCSP	#N/A	#N/A	#N/A				#N/A	#N/A	#N/A
FETUB	#N/A	#N/A	Fetub				#N/A	#N/A	#N/A
FGA	#N/A	#N/A	#N/A				#N/A	#N/A	#N/A
FGB	#N/A	#N/A	#N/A				#N/A	#N/A	#N/A
FGF1	#N/A	#N/A	#N/A				#N/A	#N/A	Fgf1
FGF10	#N/A	#N/A	#N/A				#N/A	Fgf10	#N/A
FGF16	#N/A	#N/A	#N/A				#N/A	#N/A	#N/A
FGF17	#N/A	#N/A	#N/A				#N/A	#N/A	#N/A
FGF18	#N/A	#N/A	#N/A				#N/A	#N/A	#N/A
FGF19	#N/A	#N/A	#N/A				#N/A	#N/A	#N/A
FGF2	#N/A	#N/A	#N/A				#N/A	#N/A	#N/A
FGF20	#N/A	#N/A	#N/A				#N/A	#N/A	#N/A
FGF21	#N/A	#N/A	#N/A				#N/A	#N/A	#N/A
FGF22	#N/A	#N/A	#N/A				#N/A	#N/A	#N/A
FGF23	#N/A	#N/A	#N/A				#N/A	#N/A	#N/A
FGF3	#N/A	#N/A	#N/A				#N/A	#N/A	#N/A
FGF4	#N/A	#N/A	#N/A				#N/A	#N/A	#N/A
FGF5	#N/A	#N/A	#N/A				#N/A	#N/A	#N/A
FGF6	#N/A	#N/A	#N/A				#N/A	#N/A	#N/A
FGF7	#N/A	#N/A	#N/A				#N/A	#N/A	#N/A
FGF8	#N/A	#N/A	#N/A				#N/A	#N/A	#N/A
FGF9	#N/A	#N/A	#N/A				#N/A	#N/A	#N/A
FGFBP1	#N/A	#N/A	#N/A				#N/A	#N/A	#N/A
FGFBP2	#N/A	#N/A	#N/A				#N/A	#N/A	#N/A
FGFBP3	#N/A	#N/A	#N/A				#N/A	#N/A	#N/A
FGFR2	#N/A	#N/A	#N/A				#N/A	#N/A	#N/A
FGG	#N/A	#N/A	#N/A				#N/A	#N/A	#N/A
FGL1	#N/A	#N/A	#N/A				Fgl1	Fgl1	Fgl1
FGL2	#N/A	#N/A	#N/A				#N/A	#N/A	#N/A
FLT1	#N/A	#N/A	#N/A				#N/A	#N/A	#N/A
FLT4	#N/A	#N/A	#N/A				#N/A	#N/A	#N/A
FMOD	#N/A	#N/A	#N/A				#N/A	#N/A	#N/A
FN1	#N/A	#N/A	#N/A				#N/A	#N/A	#N/A
FNDC1	#N/A	#N/A	#N/A				#N/A	#N/A	#N/A
FNDC7	#N/A	#N/A	#N/A				#N/A	#N/A	#N/A
FOLR1	#N/A	#N/A	#N/A				#N/A	#N/A	Folr1
FOLR2	#N/A	#N/A	#N/A				#N/A	Folr2	#N/A
FOLR3	#N/A	#N/A	#N/A				#N/A	#N/A	#N/A
FREM1	#N/A	#N/A	#N/A				#N/A	#N/A	#N/A
FREM3	#N/A	#N/A	#N/A				#N/A	#N/A	#N/A
FRZB	#N/A	#N/A	Frzb				#N/A	#N/A	#N/A
FSHB	#N/A	#N/A	#N/A				#N/A	#N/A	#N/A
FST	#N/A	#N/A	#N/A				#N/A	Fst	#N/A
FSTL1	#N/A	#N/A	#N/A				#N/A	#N/A	#N/A
FSTL3	#N/A	#N/A	#N/A				#N/A	#N/A	#N/A
FSTL4	#N/A	#N/A	#N/A				#N/A	#N/A	#N/A
FSTL5	#N/A	#N/A	#N/A				#N/A	#N/A	#N/A
FTCDNL1	#N/A	#N/A	#N/A				#N/A	#N/A	#N/A
FUCA2	#N/A	#N/A	#N/A				#N/A	#N/A	#N/A
GAL	#N/A	#N/A	#N/A				#N/A	#N/A	#N/A
GALP	#N/A	#N/A	#N/A				#N/A	#N/A	#N/A
GAS6	#N/A	#N/A	#N/A				#N/A	#N/A	#N/A
GAST	#N/A	#N/A	#N/A				#N/A	#N/A	#N/A
GATD1	#N/A	#N/A	#N/A				#N/A	#N/A	#N/A
GC	#N/A	#N/A	#N/A				#N/A	#N/A	#N/A
GCG	#N/A	#N/A	#N/A				#N/A	#N/A	#N/A
GDF1	#N/A	#N/A	#N/A				#N/A	#N/A	#N/A
GDF10	#N/A	#N/A	#N/A				#N/A	#N/A	#N/A
GDF11	#N/A	#N/A	#N/A				#N/A	#N/A	#N/A
GDF15	#N/A	#N/A	#N/A				Gdf15	Gdf15	#N/A
GDF2	#N/A	#N/A	#N/A				#N/A	#N/A	#N/A
GDF3	#N/A	#N/A	Gdf3				#N/A	#N/A	#N/A
GDF5	#N/A	#N/A	#N/A				#N/A	#N/A	#N/A
GDF6	#N/A	#N/A	#N/A				#N/A	#N/A	#N/A
GDF7	#N/A	#N/A	#N/A				#N/A	Gdf7	#N/A
GDF9	#N/A	#N/A	#N/A				#N/A	#N/A	#N/A
GDNF	#N/A	#N/A	#N/A				#N/A	#N/A	#N/A
GFOD1	#N/A	#N/A	#N/A				#N/A	#N/A	#N/A
GFOD2	#N/A	#N/A	#N/A				#N/A	#N/A	#N/A
GH1	#N/A	#N/A	#N/A				#N/A	#N/A	#N/A
GH2	#N/A	#N/A	#N/A				#N/A	#N/A	#N/A
GHR	#N/A	#N/A	#N/A				#N/A	#N/A	#N/A
GHRH	#N/A	#N/A	#N/A				#N/A	#N/A	#N/A
GHRL	#N/A	#N/A	#N/A				#N/A	#N/A	#N/A
GIF	#N/A	#N/A	#N/A				#N/A	#N/A	#N/A
GIP	#N/A	#N/A	#N/A				#N/A	#N/A	#N/A
GKN1	#N/A	#N/A	#N/A				#N/A	#N/A	#N/A
GKN2	#N/A	#N/A	#N/A				#N/A	#N/A	#N/A
GLB1L	#N/A	#N/A	Glb1l				#N/A	#N/A	#N/A
GLB1L2	#N/A	#N/A	#N/A				Glb1l2	Glb1l2	Glb1l2
GLDN	#N/A	#N/A	#N/A				#N/A	#N/A	#N/A
GLIPR1L1	#N/A	#N/A	#N/A				#N/A	#N/A	#N/A
GLT1D1	#N/A	#N/A	#N/A				#N/A	#N/A	Glt1d1
GLTPD2	#N/A	#N/A	#N/A				#N/A	#N/A	#N/A
GNLY	#N/A	#N/A	#N/A				#N/A	#N/A	#N/A
GNRH1	#N/A	#N/A	#N/A				#N/A	#N/A	#N/A
GNRH2	#N/A	#N/A	#N/A				#N/A	#N/A	#N/A
GPHA2	#N/A	#N/A	#N/A				#N/A	#N/A	#N/A
GPHB5	#N/A	#N/A	#N/A				#N/A	#N/A	#N/A
GPI	#N/A	#N/A	#N/A				#N/A	#N/A	#N/A
GPLD1	#N/A	#N/A	#N/A				#N/A	#N/A	Gpld1
GPX3	#N/A	#N/A	#N/A				#N/A	#N/A	#N/A
GPX5	#N/A	#N/A	#N/A				#N/A	#N/A	#N/A
GPX6	#N/A	#N/A	#N/A				#N/A	#N/A	#N/A
GPX7	#N/A	#N/A	#N/A				#N/A	#N/A	#N/A
GREM1	#N/A	#N/A	#N/A				#N/A	#N/A	#N/A
GREM2	#N/A	#N/A	#N/A				Grem2	Grem2	Grem2
GRN	#N/A	#N/A	#N/A				#N/A	#N/A	#N/A
GRP	#N/A	#N/A	#N/A				#N/A	#N/A	#N/A
GSN	#N/A	#N/A	#N/A				#N/A	#N/A	#N/A
GUCA2A	#N/A	#N/A	Guca2a				#N/A	#N/A	#N/A
GUCA2B	#N/A	#N/A	#N/A				#N/A	#N/A	#N/A
GZMA	#N/A	#N/A	#N/A				#N/A	#N/A	#N/A
GZMB	#N/A	#N/A	#N/A				#N/A	#N/A	#N/A
GZMH	#N/A	#N/A	#N/A				#N/A	#N/A	#N/A
GZMK	#N/A	#N/A	#N/A				#N/A	#N/A	#N/A
GZMM	Gzmm	Gzmm	#N/A				#N/A	#N/A	#N/A
HABP2	#N/A	Habp2	#N/A				#N/A	#N/A	#N/A
HAMP	#N/A	#N/A	#N/A				#N/A	#N/A	#N/A
HAPLN1	#N/A	#N/A	#N/A				#N/A	#N/A	#N/A
HAPLN2	#N/A	#N/A	#N/A				#N/A	#N/A	#N/A
HAPLN3	#N/A	#N/A	#N/A				#N/A	#N/A	#N/A
HAPLN4	#N/A	#N/A	#N/A				#N/A	#N/A	#N/A
HBEGF	#N/A	#N/A	#N/A				#N/A	#N/A	#N/A
HCRT	#N/A	#N/A	#N/A				#N/A	#N/A	#N/A
HGF	#N/A	#N/A	Hgf				#N/A	#N/A	#N/A
HGFAC	Hgfac	Hgfac	Hgfac				#N/A	#N/A	#N/A
HHIP	#N/A	#N/A	#N/A				Hhip	Hhip	Hhip
HHIPL1	#N/A	#N/A	#N/A				#N/A	#N/A	#N/A
HHIPL2	#N/A	#N/A	#N/A				#N/A	#N/A	#N/A
HHLA1	#N/A	#N/A	#N/A				#N/A	#N/A	#N/A
HLA-G	#N/A	#N/A	#N/A				#N/A	#N/A	#N/A
HMCN1	#N/A	#N/A	#N/A				#N/A	#N/A	#N/A
HMCN2	#N/A	#N/A	#N/A				#N/A	#N/A	Hmcn2
HMSD	#N/A	#N/A	#N/A				#N/A	#N/A	#N/A
HP	Hp	Hp	#N/A				#N/A	#N/A	#N/A
HPR	#N/A	#N/A	#N/A				#N/A	#N/A	#N/A
HPSE	Hpse	Hpse	Hpse				#N/A	#N/A	#N/A
HPSE2	#N/A	#N/A	#N/A				#N/A	#N/A	#N/A
HPX	Hpx	Hpx	Hpx				#N/A	#N/A	#N/A
HRG	#N/A	#N/A	#N/A				#N/A	#N/A	#N/A
HSD11B1L	#N/A	#N/A	#N/A				#N/A	#N/A	#N/A
HSPG2	#N/A	#N/A	#N/A				#N/A	#N/A	#N/A
HTN1	#N/A	#N/A	#N/A				#N/A	#N/A	#N/A
HTN3	#N/A	#N/A	#N/A				#N/A	#N/A	#N/A
HTRA1	#N/A	#N/A	#N/A				#N/A	#N/A	#N/A
HTRA3	#N/A	#N/A	#N/A				#N/A	#N/A	#N/A
HTRA4	#N/A	#N/A	#N/A				#N/A	Htra4	Htra4
HYAL1	#N/A	#N/A	#N/A				#N/A	#N/A	#N/A
HYAL3	#N/A	#N/A	#N/A				#N/A	#N/A	#N/A
IAPP	#N/A	#N/A	#N/A				#N/A	#N/A	#N/A
IBSP	#N/A	#N/A	Ibsp				Ibsp	Ibsp	#N/A
IFNA1	#N/A	#N/A	#N/A				#N/A	#N/A	#N/A
IFNA10	#N/A	#N/A	#N/A				#N/A	#N/A	#N/A
IFNA13	#N/A	#N/A	#N/A				#N/A	#N/A	#N/A
IFNA14	#N/A	#N/A	#N/A				#N/A	#N/A	#N/A
IFNA16	#N/A	#N/A	#N/A				#N/A	#N/A	#N/A
IFNA17	#N/A	#N/A	#N/A				#N/A	#N/A	#N/A
IFNA2	#N/A	#N/A	#N/A				#N/A	#N/A	#N/A
IFNA21	#N/A	#N/A	#N/A				#N/A	#N/A	#N/A
IFNA4	#N/A	#N/A	#N/A				#N/A	#N/A	#N/A
IFNA5	#N/A	#N/A	#N/A				#N/A	#N/A	#N/A
IFNA6	#N/A	#N/A	#N/A				#N/A	#N/A	#N/A
IFNA7	#N/A	#N/A	#N/A				#N/A	#N/A	#N/A
IFNA8	#N/A	#N/A	#N/A				#N/A	#N/A	#N/A
IFNAR2	#N/A	#N/A	#N/A				#N/A	#N/A	#N/A
IFNB1	#N/A	#N/A	#N/A				#N/A	#N/A	#N/A
IFNE	#N/A	#N/A	#N/A				#N/A	#N/A	#N/A
IFNG	#N/A	#N/A	#N/A				#N/A	#N/A	#N/A
IFNK	#N/A	#N/A	#N/A				#N/A	#N/A	#N/A
IFNL1	#N/A	#N/A	#N/A				#N/A	#N/A	#N/A
IFNL2	#N/A	#N/A	#N/A				#N/A	#N/A	#N/A
IFNL3	#N/A	#N/A	#N/A				#N/A	#N/A	#N/A
IFNW1	#N/A	#N/A	#N/A				#N/A	#N/A	#N/A
IGF1	#N/A	#N/A	Igf1				#N/A	#N/A	#N/A
IGF2	#N/A	#N/A	#N/A				#N/A	#N/A	#N/A
IGFALS	#N/A	#N/A	#N/A				#N/A	#N/A	Igfals
IGFBP1	#N/A	#N/A	#N/A				#N/A	#N/A	#N/A
IGFBP2	#N/A	#N/A	#N/A				#N/A	Igfbp2	Igfbp2
IGFBP3	#N/A	#N/A	Igfbp3				#N/A	#N/A	#N/A
IGFBP4	#N/A	#N/A	#N/A				#N/A	#N/A	#N/A
IGFBP5	#N/A	#N/A	#N/A				#N/A	#N/A	#N/A
IGFBP6	#N/A	#N/A	#N/A				#N/A	#N/A	#N/A
IGFBP7	#N/A	#N/A	#N/A				#N/A	#N/A	#N/A
IGFBPL1	#N/A	#N/A	#N/A				#N/A	#N/A	#N/A
IGFL1	#N/A	#N/A	#N/A				#N/A	#N/A	#N/A
IGFL2	#N/A	#N/A	#N/A				#N/A	#N/A	#N/A
IGFL3	#N/A	#N/A	#N/A				#N/A	#N/A	#N/A
IGFL4	#N/A	#N/A	#N/A				#N/A	#N/A	#N/A
IGIP	#N/A	#N/A	#N/A				#N/A	#N/A	#N/A
IGLL1	#N/A	#N/A	#N/A				#N/A	#N/A	#N/A
IGLL5	#N/A	#N/A	#N/A				#N/A	#N/A	#N/A
IGLON5	#N/A	#N/A	#N/A				#N/A	#N/A	#N/A
IGSF10	#N/A	#N/A	#N/A				#N/A	#N/A	#N/A
IHH	Ihh	Ihh	#N/A				#N/A	#N/A	#N/A
IL10	#N/A	#N/A	#N/A				#N/A	#N/A	#N/A
IL11	#N/A	#N/A	Il11				#N/A	#N/A	#N/A
IL12A	#N/A	#N/A	#N/A				#N/A	#N/A	#N/A
IL12B	#N/A	#N/A	Il12b				#N/A	#N/A	#N/A
IL13	#N/A	#N/A	#N/A				#N/A	#N/A	#N/A
IL15	#N/A	#N/A	#N/A				#N/A	#N/A	#N/A
IL15RA	#N/A	#N/A	#N/A				#N/A	#N/A	#N/A
IL16	#N/A	#N/A	#N/A				#N/A	#N/A	#N/A
IL17A	#N/A	#N/A	#N/A				#N/A	#N/A	#N/A
IL17B	#N/A	#N/A	#N/A				#N/A	#N/A	#N/A
IL17C	#N/A	#N/A	#N/A				#N/A	#N/A	#N/A
IL17D	#N/A	#N/A	#N/A				#N/A	#N/A	#N/A
IL17F	#N/A	#N/A	#N/A				#N/A	#N/A	#N/A
IL17RA	#N/A	#N/A	#N/A				#N/A	#N/A	#N/A
IL18	#N/A	#N/A	#N/A				#N/A	#N/A	#N/A
IL18BP	#N/A	#N/A	#N/A				#N/A	#N/A	#N/A
IL19	#N/A	#N/A	#N/A				#N/A	#N/A	#N/A
IL1A	#N/A	#N/A	Il1a				#N/A	#N/A	#N/A
IL1B	Il1b	Il1b	Il1b				#N/A	#N/A	#N/A
IL1F10	#N/A	#N/A	#N/A				#N/A	#N/A	#N/A
IL1R1	#N/A	#N/A	#N/A				#N/A	#N/A	#N/A
IL1R2	#N/A	#N/A	#N/A				#N/A	#N/A	#N/A
IL1RAP	#N/A	#N/A	#N/A				#N/A	Il1rap	#N/A
IL1RL1	#N/A	#N/A	#N/A				#N/A	#N/A	#N/A
IL1RN	Il1rn	Il1rn	Il1rn				#N/A	#N/A	#N/A
IL2	#N/A	#N/A	#N/A				#N/A	#N/A	#N/A
IL20	#N/A	#N/A	#N/A				#N/A	#N/A	#N/A
IL21	#N/A	#N/A	#N/A				#N/A	#N/A	#N/A
IL22	#N/A	#N/A	#N/A				#N/A	#N/A	#N/A
IL22RA2	#N/A	#N/A	#N/A				#N/A	#N/A	#N/A
IL23A	#N/A	#N/A	#N/A				#N/A	#N/A	#N/A
IL24	#N/A	#N/A	#N/A				#N/A	#N/A	#N/A
IL25	#N/A	#N/A	#N/A				#N/A	#N/A	#N/A
IL26	#N/A	#N/A	#N/A				#N/A	#N/A	#N/A
IL27	#N/A	#N/A	#N/A				#N/A	#N/A	#N/A
IL3	#N/A	#N/A	#N/A				#N/A	#N/A	#N/A
IL31	#N/A	#N/A	#N/A				#N/A	#N/A	#N/A
IL32	#N/A	#N/A	#N/A				#N/A	#N/A	#N/A
IL33	#N/A	#N/A	Il33				#N/A	#N/A	#N/A
IL34	#N/A	#N/A	#N/A				#N/A	#N/A	#N/A
IL36A	#N/A	#N/A	#N/A				#N/A	#N/A	#N/A
IL36B	#N/A	#N/A	#N/A				#N/A	#N/A	#N/A
IL36G	#N/A	#N/A	#N/A				#N/A	#N/A	#N/A
IL36RN	#N/A	#N/A	#N/A				#N/A	#N/A	#N/A
IL37	#N/A	#N/A	#N/A				#N/A	#N/A	#N/A
IL4	#N/A	#N/A	#N/A				#N/A	#N/A	#N/A
IL4I1	#N/A	#N/A	#N/A				#N/A	#N/A	#N/A
IL4R	#N/A	#N/A	#N/A				#N/A	#N/A	#N/A
IL5	#N/A	#N/A	#N/A				#N/A	#N/A	#N/A
IL6	#N/A	#N/A	Il6				#N/A	#N/A	#N/A
IL6ST	#N/A	#N/A	#N/A				#N/A	#N/A	#N/A
IL7	#N/A	#N/A	#N/A				#N/A	#N/A	#N/A
IL9	#N/A	#N/A	#N/A				#N/A	#N/A	#N/A
IMPG1	#N/A	#N/A	#N/A				#N/A	#N/A	#N/A
INHA	#N/A	Inha	#N/A				#N/A	#N/A	#N/A
INHBA	#N/A	#N/A	#N/A				#N/A	#N/A	#N/A
INHBB	#N/A	Inhbb	Inhbb				#N/A	#N/A	#N/A
INHBC	#N/A	#N/A	#N/A				#N/A	#N/A	#N/A
INHBE	#N/A	#N/A	#N/A				#N/A	#N/A	#N/A
INS	#N/A	#N/A	#N/A				#N/A	#N/A	#N/A
INS-IGF2	#N/A	#N/A	#N/A				#N/A	#N/A	#N/A
INSL3	#N/A	#N/A	#N/A				#N/A	#N/A	#N/A
INSL4	#N/A	#N/A	#N/A				#N/A	#N/A	#N/A
INSL5	#N/A	#N/A	#N/A				#N/A	#N/A	#N/A
INSL6	#N/A	#N/A	#N/A				#N/A	#N/A	#N/A
ISG15	Isg15	Isg15	Isg15				#N/A	#N/A	#N/A
ISLR	#N/A	#N/A	#N/A				#N/A	#N/A	#N/A
ISM1	#N/A	#N/A	#N/A				Ism1	Ism1	Ism1
ISM2	#N/A	#N/A	#N/A				Ism2	Ism2	Ism2
ITGBL1	#N/A	#N/A	#N/A				#N/A	#N/A	#N/A
ITIH1	#N/A	#N/A	#N/A				#N/A	#N/A	#N/A
ITIH2	#N/A	#N/A	#N/A				#N/A	#N/A	#N/A
ITIH3	#N/A	#N/A	#N/A				#N/A	#N/A	#N/A
ITIH4	#N/A	#N/A	#N/A				#N/A	#N/A	#N/A
ITIH5	#N/A	#N/A	#N/A				Itih5	Itih5	Itih5
ITIH6	#N/A	#N/A	#N/A				#N/A	#N/A	#N/A
ITLN1	#N/A	#N/A	#N/A				Itln1	Itln1	Itln1
ITLN2	#N/A	#N/A	#N/A				#N/A	#N/A	#N/A
IZUMO4	#N/A	#N/A	#N/A				#N/A	#N/A	#N/A
JAM3	#N/A	#N/A	#N/A				#N/A	#N/A	#N/A
JCHAIN	#N/A	#N/A	#N/A				#N/A	#N/A	#N/A
KAZALD1	#N/A	#N/A	#N/A				#N/A	#N/A	#N/A
KCP	#N/A	#N/A	#N/A				#N/A	#N/A	#N/A
KERA	#N/A	#N/A	#N/A				#N/A	#N/A	#N/A
KIAA0100	#N/A	#N/A	#N/A				#N/A	#N/A	#N/A
KIAA0319	#N/A	#N/A	#N/A				#N/A	#N/A	#N/A
KIR3DX1	#N/A	#N/A	#N/A				#N/A	#N/A	#N/A
KISS1	#N/A	#N/A	#N/A				#N/A	#N/A	#N/A
KL	#N/A	#N/A	#N/A				#N/A	#N/A	#N/A
KLK1	#N/A	#N/A	#N/A				#N/A	#N/A	#N/A
KLK10	#N/A	#N/A	#N/A				#N/A	#N/A	Klk10
KLK11	#N/A	#N/A	#N/A				#N/A	#N/A	#N/A
KLK12	#N/A	#N/A	#N/A				#N/A	#N/A	#N/A
KLK13	#N/A	#N/A	#N/A				#N/A	#N/A	#N/A
KLK14	#N/A	#N/A	#N/A				#N/A	Klk14	#N/A
KLK15	#N/A	#N/A	#N/A				#N/A	#N/A	#N/A
KLK2	#N/A	#N/A	#N/A				#N/A	#N/A	#N/A
KLK3	#N/A	#N/A	#N/A				#N/A	#N/A	#N/A
KLK4	#N/A	#N/A	#N/A				#N/A	#N/A	#N/A
KLK5	#N/A	#N/A	#N/A				#N/A	#N/A	#N/A
KLK6	#N/A	#N/A	#N/A				#N/A	#N/A	#N/A
KLK7	#N/A	#N/A	#N/A				#N/A	#N/A	#N/A
KLK8	#N/A	#N/A	#N/A				#N/A	#N/A	#N/A
KLK9	#N/A	#N/A	#N/A				#N/A	#N/A	#N/A
KLKB1	#N/A	#N/A	#N/A				#N/A	#N/A	#N/A
KNG1	#N/A	#N/A	#N/A				#N/A	#N/A	#N/A
KRTDAP	#N/A	#N/A	#N/A				#N/A	#N/A	#N/A
LACRT	#N/A	#N/A	#N/A				#N/A	#N/A	#N/A
LAD1	Lad1	Lad1	#N/A				#N/A	#N/A	#N/A
LAG3	#N/A	#N/A	Lag3				#N/A	#N/A	#N/A
LAIR2	#N/A	#N/A	#N/A				#N/A	#N/A	#N/A
LALBA	#N/A	#N/A	#N/A				#N/A	#N/A	#N/A
LAMA1	#N/A	#N/A	#N/A				#N/A	#N/A	#N/A
LAMA2	#N/A	#N/A	#N/A				#N/A	#N/A	#N/A
LAMA3	#N/A	#N/A	#N/A				#N/A	#N/A	#N/A
LAMA4	#N/A	#N/A	#N/A				#N/A	#N/A	#N/A
LAMA5	Lama5	Lama5	Lama5				#N/A	#N/A	#N/A
LAMB1	#N/A	#N/A	#N/A				#N/A	#N/A	#N/A
LAMB2	#N/A	#N/A	#N/A				#N/A	#N/A	#N/A
LAMB3	#N/A	#N/A	#N/A				#N/A	#N/A	#N/A
LAMB4	#N/A	#N/A	#N/A				#N/A	#N/A	#N/A
LAMC1	#N/A	#N/A	#N/A				#N/A	#N/A	#N/A
LAMC2	#N/A	#N/A	#N/A				#N/A	#N/A	#N/A
LAMC3	#N/A	#N/A	#N/A				Lamc3	Lamc3	Lamc3
LBP	#N/A	#N/A	Lbp				#N/A	#N/A	#N/A
LCAT	#N/A	#N/A	#N/A				Lcat	Lcat	#N/A
LCN1	#N/A	#N/A	#N/A				#N/A	#N/A	#N/A
LCN10	#N/A	#N/A	#N/A				#N/A	#N/A	#N/A
LCN12	#N/A	#N/A	#N/A				#N/A	#N/A	#N/A
LCN15	#N/A	#N/A	#N/A				#N/A	#N/A	#N/A
LCN2	#N/A	#N/A	#N/A				#N/A	#N/A	#N/A
LCN6	#N/A	#N/A	#N/A				#N/A	#N/A	#N/A
LCN8	#N/A	#N/A	#N/A				#N/A	#N/A	#N/A
LCN9	#N/A	#N/A	#N/A				#N/A	#N/A	#N/A
LDLRAD2	#N/A	#N/A	#N/A				#N/A	#N/A	#N/A
LEAP2	#N/A	#N/A	#N/A				#N/A	#N/A	#N/A
LECT2	#N/A	#N/A	#N/A				#N/A	#N/A	#N/A
LEFTY1	#N/A	#N/A	Lefty1				#N/A	#N/A	#N/A
LEFTY2	#N/A	#N/A	#N/A				#N/A	#N/A	#N/A
LEP	#N/A	#N/A	#N/A				#N/A	#N/A	#N/A
LEPR	#N/A	#N/A	#N/A				#N/A	#N/A	#N/A
LGALS1	#N/A	#N/A	#N/A				#N/A	#N/A	#N/A
LGALS3	Lgals3	Lgals3	Lgals3				#N/A	#N/A	#N/A
LGALS3BP	Lgals3bp	Lgals3bp	Lgals3bp				#N/A	#N/A	#N/A
LGALS9	#N/A	Lgals9	Lgals9				#N/A	#N/A	#N/A
LGI1	#N/A	#N/A	#N/A				Lgi1	Lgi1	Lgi1
LGI2	#N/A	#N/A	#N/A				#N/A	Lgi2	#N/A
LGI3	#N/A	#N/A	#N/A				Lgi3	Lgi3	#N/A
LGI4	#N/A	#N/A	#N/A				#N/A	#N/A	#N/A
LHB	#N/A	#N/A	#N/A				#N/A	#N/A	#N/A
LIF	Lif	Lif	Lif				#N/A	#N/A	#N/A
LILRA2	#N/A	#N/A	#N/A				#N/A	#N/A	#N/A
LILRA5	#N/A	#N/A	Lilra5				#N/A	#N/A	#N/A
LIPC	#N/A	#N/A	#N/A				Lipc	Lipc	Lipc
LIPF	#N/A	#N/A	#N/A				#N/A	#N/A	#N/A
LIPG	#N/A	#N/A	Lipg				#N/A	#N/A	#N/A
LIPH	Liph	Liph	#N/A				#N/A	#N/A	#N/A
LIPI	#N/A	#N/A	#N/A				#N/A	#N/A	#N/A
LIPK	#N/A	#N/A	#N/A				#N/A	#N/A	#N/A
LIPM	#N/A	#N/A	#N/A				#N/A	#N/A	#N/A
LIPN	#N/A	#N/A	#N/A				#N/A	#N/A	#N/A
LOX	#N/A	#N/A	#N/A				#N/A	#N/A	#N/A
LOXL1	#N/A	#N/A	#N/A				#N/A	#N/A	#N/A
LOXL2	#N/A	#N/A	#N/A				#N/A	#N/A	#N/A
LOXL3	#N/A	#N/A	Loxl3				#N/A	#N/A	#N/A
LOXL4	#N/A	#N/A	#N/A				#N/A	#N/A	#N/A
LPA	#N/A	#N/A	#N/A				#N/A	#N/A	#N/A
LPL	#N/A	#N/A	#N/A				#N/A	#N/A	#N/A
LPO	#N/A	#N/A	#N/A				#N/A	#N/A	#N/A
LRCH3	#N/A	#N/A	#N/A				#N/A	#N/A	#N/A
LRCOL1	#N/A	#N/A	#N/A				#N/A	#N/A	#N/A
LRG1	Lrg1	Lrg1	#N/A				#N/A	#N/A	#N/A
LRP8	#N/A	#N/A	#N/A				#N/A	#N/A	#N/A
LRRC17	#N/A	#N/A	#N/A				#N/A	#N/A	#N/A
LTA	#N/A	#N/A	#N/A				#N/A	#N/A	#N/A
LTBP1	#N/A	#N/A	#N/A				#N/A	#N/A	#N/A
LTBP2	Ltbp2	Ltbp2	Ltbp2				#N/A	#N/A	#N/A
LTBP3	#N/A	#N/A	#N/A				#N/A	#N/A	#N/A
LTBP4	#N/A	#N/A	#N/A				#N/A	#N/A	#N/A
LTF	Ltf	Ltf	Ltf				#N/A	#N/A	#N/A
LUM	#N/A	#N/A	#N/A				#N/A	#N/A	#N/A
LUZP2	#N/A	#N/A	#N/A				#N/A	#N/A	#N/A
LY6G5B	#N/A	#N/A	#N/A				#N/A	#N/A	#N/A
LY6G5C	#N/A	#N/A	#N/A				#N/A	#N/A	#N/A
LY6K	Ly6k	Ly6k	Ly6k				#N/A	#N/A	#N/A
LY86	#N/A	#N/A	Ly86				#N/A	#N/A	#N/A
LY96	#N/A	#N/A	#N/A				#N/A	#N/A	#N/A
LYG1	#N/A	#N/A	#N/A				#N/A	#N/A	#N/A
LYG2	#N/A	#N/A	#N/A				#N/A	#N/A	#N/A
LYPD6	#N/A	#N/A	#N/A				Lypd6	Lypd6	Lypd6
LYPD8	#N/A	Lypd8	Lypd8				#N/A	#N/A	#N/A
LYZ	#N/A	#N/A	#N/A				#N/A	#N/A	#N/A
LYZL1	#N/A	#N/A	#N/A				#N/A	#N/A	#N/A
LYZL2	#N/A	#N/A	#N/A				#N/A	#N/A	#N/A
LYZL4	#N/A	#N/A	#N/A				#N/A	#N/A	Lyzl4
LYZL6	#N/A	#N/A	#N/A				#N/A	#N/A	#N/A
MAMDC2	#N/A	#N/A	#N/A				#N/A	#N/A	#N/A
MAN2B2	Man2b2	Man2b2	Man2b2				#N/A	#N/A	#N/A
MANF	#N/A	#N/A	#N/A				#N/A	#N/A	#N/A
MASP1	#N/A	#N/A	#N/A				#N/A	#N/A	#N/A
MASP2	#N/A	#N/A	#N/A				#N/A	#N/A	#N/A
MATN1	#N/A	#N/A	#N/A				#N/A	#N/A	#N/A
MATN2	#N/A	#N/A	#N/A				#N/A	#N/A	#N/A
MATN3	#N/A	#N/A	#N/A				#N/A	#N/A	#N/A
MATN4	#N/A	#N/A	#N/A				#N/A	#N/A	#N/A
MBL2	#N/A	#N/A	#N/A				#N/A	#N/A	#N/A
MDK	#N/A	#N/A	Mdk				#N/A	#N/A	#N/A
MEGF6	#N/A	#N/A	#N/A				#N/A	#N/A	#N/A
MEI1	#N/A	#N/A	#N/A				#N/A	#N/A	#N/A
MEP1B	#N/A	#N/A	#N/A				#N/A	#N/A	#N/A
MEPE	#N/A	#N/A	#N/A				#N/A	#N/A	#N/A
MET	#N/A	#N/A	#N/A				#N/A	#N/A	Met
METRN	#N/A	#N/A	#N/A				#N/A	#N/A	#N/A
METRNL	#N/A	Metrnl	Metrnl				#N/A	#N/A	#N/A
METTL24	#N/A	#N/A	#N/A				#N/A	#N/A	#N/A
METTL9	#N/A	#N/A	#N/A				#N/A	#N/A	#N/A
MFAP2	#N/A	#N/A	Mfap2				#N/A	#N/A	#N/A
MFAP4	#N/A	#N/A	#N/A				#N/A	#N/A	#N/A
MFAP5	#N/A	#N/A	#N/A				#N/A	#N/A	#N/A
MFGE8	#N/A	#N/A	#N/A				#N/A	#N/A	#N/A
MGAT4A	Mgat4a	Mgat4a	#N/A				#N/A	#N/A	#N/A
MGP	#N/A	#N/A	Mgp				#N/A	#N/A	#N/A
MIA	#N/A	#N/A	#N/A				#N/A	#N/A	#N/A
MIF	#N/A	#N/A	#N/A				#N/A	#N/A	#N/A
MLN	#N/A	#N/A	#N/A				#N/A	#N/A	#N/A
MMP1	#N/A	#N/A	#N/A				#N/A	#N/A	#N/A
MMP10	#N/A	#N/A	#N/A				#N/A	#N/A	#N/A
MMP11	#N/A	#N/A	Mmp11				#N/A	#N/A	#N/A
MMP12	#N/A	#N/A	#N/A				#N/A	#N/A	#N/A
MMP13	#N/A	#N/A	#N/A				#N/A	#N/A	#N/A
MMP16	#N/A	#N/A	#N/A				#N/A	#N/A	Mmp16
MMP17	#N/A	#N/A	#N/A				Mmp17	Mmp17	#N/A
MMP19	#N/A	#N/A	#N/A				#N/A	#N/A	#N/A
MMP2	#N/A	#N/A	#N/A				#N/A	#N/A	#N/A
MMP20	#N/A	#N/A	#N/A				Mmp20	Mmp20	Mmp20
MMP21	#N/A	#N/A	#N/A				#N/A	#N/A	#N/A
MMP24	#N/A	#N/A	#N/A				#N/A	#N/A	#N/A
MMP25	#N/A	#N/A	#N/A				#N/A	#N/A	#N/A
MMP26	#N/A	#N/A	#N/A				#N/A	#N/A	#N/A
MMP28	#N/A	#N/A	#N/A				#N/A	#N/A	#N/A
MMP3	Mmp3	Mmp3	Mmp3				#N/A	#N/A	#N/A
MMP7	#N/A	#N/A	#N/A				#N/A	#N/A	Mmp7
MMP8	#N/A	#N/A	#N/A				#N/A	#N/A	#N/A
MMP9	#N/A	#N/A	#N/A				#N/A	Mmp9	#N/A
MMRN1	#N/A	#N/A	#N/A				Mmrn1	Mmrn1	Mmrn1
MMRN2	#N/A	#N/A	#N/A				#N/A	#N/A	#N/A
MSMB	#N/A	#N/A	#N/A				Msmb	Msmb	Msmb
MSMP	#N/A	#N/A	#N/A				#N/A	#N/A	#N/A
MST1	#N/A	#N/A	#N/A				#N/A	#N/A	#N/A
MSTN	#N/A	#N/A	#N/A				#N/A	#N/A	#N/A
MTRNR2L1	#N/A	#N/A	#N/A				#N/A	#N/A	#N/A
MTRNR2L10	#N/A	#N/A	#N/A				#N/A	#N/A	#N/A
MTRNR2L11	#N/A	#N/A	#N/A				#N/A	#N/A	#N/A
MTRNR2L12	#N/A	#N/A	#N/A				#N/A	#N/A	#N/A
MTRNR2L13	#N/A	#N/A	#N/A				#N/A	#N/A	#N/A
MTRNR2L3	#N/A	#N/A	#N/A				#N/A	#N/A	#N/A
MTRNR2L4	#N/A	#N/A	#N/A				#N/A	#N/A	#N/A
MTRNR2L5	#N/A	#N/A	#N/A				#N/A	#N/A	#N/A
MTRNR2L6	#N/A	#N/A	#N/A				#N/A	#N/A	#N/A
MTRNR2L7	#N/A	#N/A	#N/A				#N/A	#N/A	#N/A
MTRNR2L8	#N/A	#N/A	#N/A				#N/A	#N/A	#N/A
MUC1	Muc1	Muc1	Muc1				#N/A	#N/A	#N/A
MUC13	#N/A	#N/A	#N/A				#N/A	#N/A	#N/A
MUC16	#N/A	#N/A	#N/A				#N/A	#N/A	#N/A
MUC20	#N/A	#N/A	#N/A				#N/A	#N/A	Muc20
MUC4	#N/A	#N/A	#N/A				#N/A	#N/A	#N/A
MUC5AC	#N/A	#N/A	#N/A				#N/A	#N/A	#N/A
MUC5B	#N/A	#N/A	#N/A				#N/A	#N/A	#N/A
MUC6	#N/A	#N/A	#N/A				#N/A	#N/A	#N/A
MUC7	#N/A	#N/A	#N/A				#N/A	#N/A	#N/A
MUCL1	#N/A	#N/A	#N/A				#N/A	#N/A	#N/A
MXRA5	#N/A	#N/A	#N/A				#N/A	#N/A	#N/A
MXRA7	#N/A	#N/A	#N/A				#N/A	#N/A	#N/A
MYDGF	#N/A	#N/A	#N/A				#N/A	#N/A	#N/A
MYOC	#N/A	#N/A	#N/A				Myoc	Myoc	Myoc
MZB1	#N/A	#N/A	#N/A				#N/A	#N/A	#N/A
NAMPT	#N/A	#N/A	#N/A				#N/A	#N/A	#N/A
NAPSA	#N/A	#N/A	Napsa				#N/A	#N/A	#N/A
NAXE	#N/A	#N/A	#N/A				#N/A	#N/A	#N/A
NBL1	#N/A	#N/A	Nbl1				#N/A	#N/A	#N/A
NCAN	#N/A	#N/A	#N/A				#N/A	#N/A	#N/A
NDNF	#N/A	#N/A	#N/A				#N/A	#N/A	#N/A
NDP	#N/A	#N/A	#N/A				#N/A	#N/A	#N/A
NECTIN1	#N/A	#N/A	#N/A				#N/A	#N/A	#N/A
NECTIN4	#N/A	#N/A	#N/A				#N/A	#N/A	#N/A
NELL1	#N/A	#N/A	#N/A				#N/A	#N/A	Nell1
NELL2	#N/A	#N/A	#N/A				#N/A	Nell2	Nell2
NENF	#N/A	#N/A	#N/A				#N/A	#N/A	#N/A
NGF	#N/A	#N/A	#N/A				Ngf	Ngf	#N/A
NHLRC3	#N/A	#N/A	#N/A				#N/A	#N/A	#N/A
NID1	#N/A	#N/A	#N/A				#N/A	#N/A	#N/A
NID2	#N/A	#N/A	#N/A				#N/A	#N/A	#N/A
NMB	#N/A	#N/A	#N/A				#N/A	#N/A	#N/A
NMS	#N/A	#N/A	#N/A				#N/A	#N/A	#N/A
NMU	#N/A	#N/A	#N/A				#N/A	#N/A	#N/A
NODAL	#N/A	#N/A	#N/A				#N/A	#N/A	#N/A
NOG	#N/A	#N/A	#N/A				#N/A	#N/A	#N/A
NOTCH2NL	#N/A	#N/A	#N/A				#N/A	#N/A	#N/A
NOTUM	#N/A	#N/A	#N/A				#N/A	#N/A	#N/A
NOV	#N/A	#N/A	#N/A				#N/A	#N/A	#N/A
NPB	Npb	Npb	#N/A				#N/A	#N/A	#N/A
NPC2	#N/A	#N/A	#N/A				#N/A	#N/A	#N/A
NPFF	#N/A	#N/A	#N/A				#N/A	#N/A	#N/A
NPNT	Npnt	Npnt	#N/A				#N/A	#N/A	#N/A
NPPA	#N/A	#N/A	#N/A				#N/A	#N/A	#N/A
NPPB	#N/A	#N/A	#N/A				#N/A	#N/A	#N/A
NPPC	#N/A	#N/A	#N/A				#N/A	#N/A	#N/A
NPS	#N/A	#N/A	#N/A				#N/A	#N/A	#N/A
NPTX1	#N/A	#N/A	#N/A				Nptx1	Nptx1	Nptx1
NPTX2	#N/A	#N/A	#N/A				Nptx2	Nptx2	Nptx2
NPVF	#N/A	#N/A	#N/A				#N/A	#N/A	#N/A
NPW	#N/A	#N/A	#N/A				#N/A	#N/A	Npw
NPY	#N/A	#N/A	#N/A				#N/A	#N/A	#N/A
NRG1	#N/A	#N/A	#N/A				#N/A	#N/A	#N/A
NRG2	#N/A	#N/A	#N/A				Nrg2	Nrg2	#N/A
NRG3	#N/A	#N/A	#N/A				#N/A	#N/A	#N/A
NRG4	#N/A	#N/A	#N/A				#N/A	#N/A	Nrg4
NRN1L	#N/A	#N/A	#N/A				#N/A	#N/A	#N/A
NRP1	#N/A	#N/A	#N/A				#N/A	#N/A	#N/A
NRP2	#N/A	#N/A	#N/A				#N/A	#N/A	#N/A
NRTN	#N/A	#N/A	#N/A				#N/A	#N/A	Nrtn
NT5DC3	#N/A	#N/A	#N/A				#N/A	#N/A	#N/A
NTF3	#N/A	#N/A	#N/A				#N/A	#N/A	#N/A
NTF4	#N/A	#N/A	#N/A				#N/A	#N/A	#N/A
NTN1	#N/A	#N/A	#N/A				#N/A	Ntn1	Ntn1
NTN3	#N/A	#N/A	#N/A				#N/A	#N/A	#N/A
NTN4	#N/A	#N/A	Ntn4				#N/A	#N/A	#N/A
NTN5	#N/A	#N/A	#N/A				#N/A	#N/A	#N/A
NTS	#N/A	#N/A	#N/A				#N/A	#N/A	#N/A
NUCB1	#N/A	#N/A	#N/A				#N/A	#N/A	#N/A
NUCB2	Nucb2	Nucb2	#N/A				#N/A	#N/A	#N/A
NXPE3	#N/A	#N/A	#N/A				Nxpe3	Nxpe3	Nxpe3
NXPE4	#N/A	#N/A	Nxpe4				#N/A	#N/A	#N/A
NXPH1	#N/A	#N/A	#N/A				#N/A	#N/A	#N/A
NXPH2	#N/A	#N/A	#N/A				#N/A	#N/A	#N/A
NXPH3	#N/A	#N/A	#N/A				#N/A	Nxph3	#N/A
NXPH4	#N/A	#N/A	#N/A				#N/A	#N/A	#N/A
OAF	#N/A	#N/A	Oaf				#N/A	#N/A	#N/A
OBP2A	#N/A	#N/A	#N/A				#N/A	#N/A	#N/A
OBP2B	#N/A	#N/A	#N/A				#N/A	#N/A	#N/A
OC90	#N/A	#N/A	#N/A				#N/A	#N/A	#N/A
ODAPH	#N/A	#N/A	#N/A				#N/A	#N/A	#N/A
OGN	#N/A	#N/A	#N/A				Ogn	Ogn	#N/A
OIT3	#N/A	#N/A	#N/A				#N/A	#N/A	#N/A
OLFM1	#N/A	#N/A	#N/A				Olfm1	Olfm1	Olfm1
OLFM2	#N/A	#N/A	#N/A				#N/A	#N/A	#N/A
OLFM3	#N/A	#N/A	#N/A				#N/A	#N/A	#N/A
OLFM4	Olfm4	Olfm4	Olfm4				#N/A	#N/A	#N/A
OLFML1	#N/A	#N/A	#N/A				#N/A	Olfml1	Olfml1
OLFML2A	#N/A	#N/A	#N/A				#N/A	#N/A	#N/A
OLFML2B	#N/A	#N/A	#N/A				#N/A	#N/A	#N/A
OLFML3	#N/A	#N/A	Olfml3				#N/A	#N/A	#N/A
OMD	#N/A	#N/A	#N/A				#N/A	#N/A	#N/A
OOSP2	#N/A	#N/A	#N/A				#N/A	#N/A	#N/A
OPRPN	#N/A	#N/A	#N/A				#N/A	#N/A	#N/A
OPTC	#N/A	#N/A	#N/A				Optc	Optc	Optc
ORM1	#N/A	#N/A	#N/A				#N/A	#N/A	#N/A
ORM2	#N/A	#N/A	#N/A				#N/A	#N/A	#N/A
OSM	#N/A	Osm	Osm				#N/A	#N/A	#N/A
OSTN	#N/A	#N/A	#N/A				#N/A	#N/A	#N/A
OTOA	#N/A	#N/A	#N/A				#N/A	#N/A	#N/A
OTOG	#N/A	#N/A	#N/A				#N/A	#N/A	#N/A
OTOL1	#N/A	#N/A	#N/A				#N/A	#N/A	#N/A
OTOR	#N/A	#N/A	#N/A				#N/A	#N/A	#N/A
OTOS	Otos	Otos	#N/A				#N/A	#N/A	#N/A
OVCH1	#N/A	#N/A	#N/A				#N/A	#N/A	#N/A
OVCH2	#N/A	#N/A	#N/A				#N/A	#N/A	#N/A
OXT	#N/A	#N/A	#N/A				#N/A	#N/A	#N/A
P4HB	#N/A	#N/A	#N/A				#N/A	#N/A	#N/A
PAEP	#N/A	#N/A	#N/A				#N/A	#N/A	#N/A
PAM	#N/A	#N/A	#N/A				#N/A	#N/A	#N/A
PAMR1	Pamr1	Pamr1	#N/A				#N/A	#N/A	#N/A
PAPLN	#N/A	#N/A	#N/A				#N/A	#N/A	#N/A
PAPPA	#N/A	#N/A	#N/A				Pappa	Pappa	#N/A
PAPPA2	#N/A	#N/A	#N/A				Pappa2	Pappa2	Pappa2
PATE1	#N/A	#N/A	#N/A				#N/A	#N/A	#N/A
PATE2	#N/A	#N/A	#N/A				#N/A	#N/A	#N/A
PATE3	#N/A	#N/A	#N/A				#N/A	#N/A	#N/A
PATE4	#N/A	#N/A	#N/A				#N/A	#N/A	#N/A
PCDH12	#N/A	#N/A	#N/A				#N/A	#N/A	#N/A
PCDHA1	#N/A	#N/A	#N/A				#N/A	#N/A	#N/A
PCDHA10	#N/A	#N/A	#N/A				#N/A	#N/A	#N/A
PCOLCE	#N/A	#N/A	#N/A				#N/A	#N/A	#N/A
PCOLCE2	#N/A	#N/A	#N/A				#N/A	Pcolce2	Pcolce2
PCSK1	Pcsk1	Pcsk1	#N/A				#N/A	#N/A	#N/A
PCSK1N	#N/A	#N/A	#N/A				#N/A	#N/A	#N/A
PCSK2	#N/A	#N/A	#N/A				#N/A	#N/A	Pcsk2
PCSK5	#N/A	#N/A	#N/A				#N/A	#N/A	#N/A
PCSK6	#N/A	#N/A	#N/A				#N/A	#N/A	#N/A
PCSK9	#N/A	Pcsk9	Pcsk9				#N/A	#N/A	#N/A
PCYOX1L	Pcyox1l	Pcyox1l	Pcyox1l				#N/A	#N/A	#N/A
PDCD1LG2	#N/A	#N/A	Pdcd1lg2				#N/A	#N/A	#N/A
PDGFA	#N/A	#N/A	#N/A				#N/A	#N/A	#N/A
PDGFB	#N/A	#N/A	Pdgfb				#N/A	#N/A	#N/A
PDGFC	#N/A	#N/A	Pdgfc				#N/A	#N/A	#N/A
PDGFD	#N/A	#N/A	#N/A				#N/A	#N/A	#N/A
PDGFRL	#N/A	#N/A	Pdgfrl				#N/A	#N/A	#N/A
PDYN	#N/A	#N/A	#N/A				#N/A	#N/A	#N/A
PEBP4	#N/A	#N/A	#N/A				#N/A	#N/A	#N/A
PENK	#N/A	#N/A	#N/A				#N/A	#N/A	#N/A
PF4	#N/A	#N/A	#N/A				#N/A	#N/A	#N/A
PF4V1	#N/A	#N/A	#N/A				#N/A	#N/A	#N/A
PGA3	#N/A	#N/A	#N/A				#N/A	#N/A	#N/A
PGA4	#N/A	#N/A	#N/A				#N/A	#N/A	#N/A
PGA5	#N/A	#N/A	#N/A				#N/A	#N/A	#N/A
PGC	#N/A	#N/A	#N/A				#N/A	#N/A	#N/A
PGF	#N/A	#N/A	#N/A				#N/A	#N/A	#N/A
PGLYRP1	Pglyrp1	Pglyrp1	Pglyrp1				#N/A	#N/A	#N/A
PGLYRP2	#N/A	#N/A	#N/A				#N/A	#N/A	#N/A
PGLYRP3	#N/A	#N/A	#N/A				#N/A	#N/A	#N/A
PGLYRP4	#N/A	#N/A	#N/A				#N/A	#N/A	#N/A
PI15	#N/A	#N/A	#N/A				#N/A	#N/A	#N/A
PI16	#N/A	#N/A	#N/A				#N/A	#N/A	#N/A
PI3	#N/A	#N/A	#N/A				#N/A	#N/A	#N/A
PIBF1	#N/A	#N/A	#N/A				#N/A	#N/A	#N/A
PILRA	#N/A	#N/A	#N/A				#N/A	#N/A	#N/A
PINLYP	#N/A	#N/A	#N/A				#N/A	#N/A	#N/A
PIP	#N/A	#N/A	#N/A				#N/A	#N/A	#N/A
PKDCC	#N/A	#N/A	Pkdcc				#N/A	#N/A	#N/A
PLA1A	#N/A	#N/A	#N/A				#N/A	#N/A	#N/A
PLA2G10	#N/A	#N/A	#N/A				#N/A	#N/A	#N/A
PLA2G12A	#N/A	#N/A	#N/A				#N/A	#N/A	Pla2g12a
PLA2G12B	#N/A	#N/A	#N/A				#N/A	#N/A	#N/A
PLA2G1B	#N/A	#N/A	#N/A				#N/A	#N/A	#N/A
PLA2G2A	#N/A	#N/A	#N/A				#N/A	#N/A	#N/A
PLA2G2C	#N/A	#N/A	#N/A				#N/A	#N/A	#N/A
PLA2G2D	#N/A	#N/A	#N/A				Pla2g2d	Pla2g2d	#N/A
PLA2G2E	#N/A	#N/A	#N/A				#N/A	#N/A	#N/A
PLA2G3	#N/A	#N/A	#N/A				#N/A	#N/A	#N/A
PLA2G5	#N/A	#N/A	#N/A				#N/A	#N/A	#N/A
PLA2G7	#N/A	#N/A	#N/A				#N/A	#N/A	#N/A
PLA2R1	#N/A	#N/A	#N/A				#N/A	#N/A	#N/A
PLAC1	#N/A	#N/A	#N/A				#N/A	#N/A	#N/A
PLAC9	#N/A	#N/A	#N/A				#N/A	#N/A	#N/A
PLAT	#N/A	#N/A	Plat				#N/A	#N/A	#N/A
PLAU	#N/A	#N/A	#N/A				#N/A	#N/A	#N/A
PLG	#N/A	#N/A	#N/A				#N/A	#N/A	#N/A
PLGLB1	#N/A	#N/A	#N/A				#N/A	#N/A	#N/A
PLGLB2	#N/A	#N/A	#N/A				#N/A	#N/A	#N/A
PLOD3	#N/A	#N/A	Plod3				#N/A	#N/A	#N/A
PLTP	#N/A	#N/A	#N/A				#N/A	#N/A	#N/A
PM20D1	#N/A	#N/A	#N/A				#N/A	#N/A	#N/A
PMCH	#N/A	#N/A	#N/A				#N/A	#N/A	#N/A
PNLIP	#N/A	#N/A	#N/A				#N/A	#N/A	#N/A
PNLIPRP1	#N/A	#N/A	#N/A				Pnliprp1	Pnliprp1	Pnliprp1
PNLIPRP3	#N/A	#N/A	#N/A				#N/A	#N/A	#N/A
PNOC	#N/A	#N/A	#N/A				#N/A	#N/A	#N/A
PODN	#N/A	#N/A	#N/A				#N/A	#N/A	#N/A
PODNL1	#N/A	#N/A	Podnl1				#N/A	#N/A	#N/A
POMC	#N/A	#N/A	#N/A				#N/A	#N/A	#N/A
PON1	#N/A	#N/A	#N/A				#N/A	#N/A	#N/A
PON2	#N/A	#N/A	#N/A				#N/A	#N/A	#N/A
PON3	Pon3	Pon3	#N/A				#N/A	#N/A	#N/A
POSTN	#N/A	#N/A	#N/A				#N/A	#N/A	#N/A
PPBP	#N/A	#N/A	#N/A				#N/A	#N/A	#N/A
PPIA	#N/A	#N/A	#N/A				#N/A	#N/A	#N/A
PPIB	#N/A	#N/A	#N/A				#N/A	#N/A	#N/A
PPY	#N/A	#N/A	#N/A				#N/A	#N/A	#N/A
PRADC1	#N/A	#N/A	#N/A				#N/A	#N/A	#N/A
PRAP1	#N/A	#N/A	#N/A				#N/A	#N/A	#N/A
PRB1	#N/A	#N/A	#N/A				#N/A	#N/A	#N/A
PRB2	#N/A	#N/A	#N/A				#N/A	#N/A	#N/A
PRB3	#N/A	#N/A	#N/A				#N/A	#N/A	#N/A
PRB4	#N/A	#N/A	#N/A				#N/A	#N/A	#N/A
PRELP	#N/A	#N/A	#N/A				#N/A	#N/A	Prelp
PRG3	#N/A	#N/A	#N/A				#N/A	#N/A	#N/A
PRG4	#N/A	#N/A	#N/A				#N/A	#N/A	#N/A
PRH2	#N/A	#N/A	#N/A				#N/A	#N/A	#N/A
PRL	#N/A	#N/A	#N/A				#N/A	#N/A	#N/A
PRLH	#N/A	#N/A	#N/A				#N/A	#N/A	#N/A
PROC	#N/A	#N/A	#N/A				Proc	#N/A	Proc
PROK1	#N/A	#N/A	#N/A				#N/A	#N/A	#N/A
PROK2	#N/A	#N/A	#N/A				#N/A	#N/A	#N/A
PROS1	#N/A	#N/A	#N/A				#N/A	#N/A	#N/A
PROZ	#N/A	#N/A	#N/A				#N/A	#N/A	#N/A
PRR27	#N/A	#N/A	#N/A				#N/A	#N/A	#N/A
PRR4	#N/A	#N/A	#N/A				#N/A	#N/A	#N/A
PRSS1	#N/A	#N/A	#N/A				#N/A	#N/A	#N/A
PRSS12	#N/A	#N/A	#N/A				#N/A	#N/A	#N/A
PRSS16	#N/A	#N/A	#N/A				#N/A	#N/A	#N/A
PRSS2	#N/A	#N/A	#N/A				#N/A	#N/A	#N/A
PRSS22	Prss22	Prss22	#N/A				#N/A	#N/A	#N/A
PRSS23	#N/A	#N/A	#N/A				#N/A	#N/A	#N/A
PRSS27	Prss27	Prss27	Prss27				#N/A	#N/A	#N/A
PRSS3	#N/A	#N/A	#N/A				#N/A	#N/A	#N/A
PRSS33	#N/A	#N/A	#N/A				#N/A	#N/A	#N/A
PRSS35	#N/A	#N/A	#N/A				#N/A	#N/A	#N/A
PRSS36	#N/A	#N/A	#N/A				#N/A	#N/A	#N/A
PRSS37	#N/A	#N/A	#N/A				#N/A	#N/A	#N/A
PRSS38	#N/A	#N/A	#N/A				#N/A	#N/A	#N/A
PRSS42	#N/A	#N/A	#N/A				#N/A	#N/A	#N/A
PRSS48	#N/A	#N/A	#N/A				#N/A	#N/A	#N/A
PRSS51	#N/A	#N/A	#N/A				#N/A	#N/A	#N/A
PRSS53	#N/A	#N/A	#N/A				#N/A	#N/A	#N/A
PRSS54	#N/A	#N/A	#N/A				#N/A	#N/A	#N/A
PRSS57	#N/A	#N/A	#N/A				#N/A	#N/A	#N/A
PRSS58	#N/A	#N/A	#N/A				#N/A	#N/A	#N/A
PRSS8	#N/A	#N/A	#N/A				#N/A	#N/A	Prss8
PRTN3	#N/A	#N/A	Prtn3				#N/A	#N/A	#N/A
PSAPL1	Psapl1	Psapl1	Psapl1				#N/A	#N/A	#N/A
PSG1	#N/A	#N/A	#N/A				#N/A	#N/A	#N/A
PSG11	#N/A	#N/A	#N/A				#N/A	#N/A	#N/A
PSG2	#N/A	#N/A	#N/A				#N/A	#N/A	#N/A
PSG3	#N/A	#N/A	#N/A				#N/A	#N/A	#N/A
PSG4	#N/A	#N/A	#N/A				#N/A	#N/A	#N/A
PSG5	#N/A	#N/A	#N/A				#N/A	#N/A	#N/A
PSG6	#N/A	#N/A	#N/A				#N/A	#N/A	#N/A
PSG7	#N/A	#N/A	#N/A				#N/A	#N/A	#N/A
PSG8	#N/A	#N/A	#N/A				#N/A	#N/A	#N/A
PSG9	#N/A	#N/A	#N/A				#N/A	#N/A	#N/A
PSORS1C2	#N/A	#N/A	#N/A				#N/A	#N/A	#N/A
PSPN	#N/A	#N/A	#N/A				#N/A	#N/A	#N/A
PTEN	#N/A	#N/A	#N/A				#N/A	#N/A	#N/A
PTGDS	#N/A	#N/A	#N/A				#N/A	#N/A	#N/A
PTH	#N/A	#N/A	#N/A				#N/A	#N/A	#N/A
PTH2	#N/A	#N/A	#N/A				#N/A	#N/A	#N/A
PTHLH	#N/A	#N/A	#N/A				#N/A	#N/A	#N/A
PTK7	#N/A	#N/A	Ptk7				#N/A	#N/A	#N/A
PTN	#N/A	#N/A	#N/A				#N/A	#N/A	#N/A
PTPRS	#N/A	#N/A	#N/A				#N/A	#N/A	#N/A
PTPRZ1	#N/A	#N/A	#N/A				#N/A	#N/A	Ptprz1
PTX3	#N/A	#N/A	#N/A				#N/A	#N/A	#N/A
PTX4	#N/A	#N/A	#N/A				#N/A	#N/A	#N/A
PVR	#N/A	Pvr	Pvr				#N/A	#N/A	#N/A
PXDN	#N/A	#N/A	Pxdn				#N/A	#N/A	#N/A
PYY	#N/A	#N/A	#N/A				#N/A	#N/A	#N/A
PZP	#N/A	#N/A	#N/A				#N/A	#N/A	#N/A
QPCT	#N/A	#N/A	#N/A				#N/A	#N/A	#N/A
QRFP	#N/A	#N/A	#N/A				#N/A	#N/A	#N/A
QSOX1	Qsox1	Qsox1	#N/A				#N/A	#N/A	#N/A
R3HDML	#N/A	#N/A	#N/A				#N/A	#N/A	#N/A
RAET1G	#N/A	#N/A	#N/A				#N/A	#N/A	#N/A
RARRES2	#N/A	#N/A	#N/A				#N/A	#N/A	#N/A
RBP3	#N/A	#N/A	#N/A				#N/A	#N/A	#N/A
RBP4	#N/A	#N/A	#N/A				#N/A	#N/A	#N/A
REG1A	#N/A	#N/A	#N/A				#N/A	#N/A	#N/A
REG1B	#N/A	#N/A	#N/A				#N/A	#N/A	#N/A
REG3A	#N/A	#N/A	#N/A				#N/A	#N/A	#N/A
REG3G	Reg3g	Reg3g	Reg3g				#N/A	#N/A	#N/A
REG4	#N/A	#N/A	#N/A				#N/A	#N/A	#N/A
RELN	#N/A	#N/A	#N/A				#N/A	Reln	Reln
REN	#N/A	#N/A	#N/A				#N/A	#N/A	#N/A
RETN	#N/A	#N/A	#N/A				#N/A	#N/A	#N/A
RETNLB	#N/A	#N/A	#N/A				#N/A	#N/A	#N/A
RGMA	#N/A	#N/A	#N/A				#N/A	#N/A	#N/A
RLN1	#N/A	#N/A	#N/A				#N/A	#N/A	#N/A
RLN2	#N/A	#N/A	#N/A				#N/A	#N/A	#N/A
RLN3	#N/A	#N/A	#N/A				#N/A	#N/A	#N/A
RNASE1	#N/A	#N/A	#N/A				Rnase1	Rnase1	Rnase1
RNASE10	#N/A	#N/A	#N/A				#N/A	#N/A	#N/A
RNASE11	#N/A	#N/A	#N/A				#N/A	#N/A	#N/A
RNASE12	#N/A	#N/A	#N/A				#N/A	#N/A	#N/A
RNASE13	#N/A	#N/A	#N/A				#N/A	#N/A	#N/A
RNASE2	#N/A	#N/A	#N/A				#N/A	#N/A	#N/A
RNASE3	#N/A	#N/A	#N/A				#N/A	#N/A	#N/A
RNASE4	#N/A	#N/A	#N/A				Rnase4	Rnase4	#N/A
RNASE6	#N/A	#N/A	#N/A				#N/A	#N/A	#N/A
RNASE7	#N/A	#N/A	#N/A				#N/A	#N/A	#N/A
RNASE8	#N/A	#N/A	#N/A				#N/A	#N/A	#N/A
RNASE9	#N/A	#N/A	#N/A				#N/A	#N/A	#N/A
RNASET2	#N/A	#N/A	#N/A				#N/A	#N/A	#N/A
RNLS	#N/A	#N/A	#N/A				#N/A	#N/A	#N/A
RNPEP	#N/A	#N/A	#N/A				#N/A	#N/A	#N/A
RPTN	#N/A	#N/A	#N/A				#N/A	#N/A	#N/A
RS1	#N/A	#N/A	#N/A				#N/A	#N/A	#N/A
RSPO1	#N/A	#N/A	#N/A				#N/A	#N/A	#N/A
RSPO2	#N/A	#N/A	#N/A				Rspo2	Rspo2	Rspo2
RSPO3	#N/A	#N/A	#N/A				#N/A	#N/A	#N/A
RSPO4	#N/A	#N/A	#N/A				#N/A	#N/A	#N/A
RSPRY1	#N/A	#N/A	#N/A				#N/A	#N/A	#N/A
RTBDN	#N/A	#N/A	#N/A				#N/A	#N/A	#N/A
S100A12	#N/A	#N/A	#N/A				#N/A	#N/A	#N/A
S100A13	#N/A	#N/A	S100a13				#N/A	#N/A	#N/A
S100A7	#N/A	#N/A	#N/A				#N/A	#N/A	#N/A
S100A8	#N/A	#N/A	#N/A				#N/A	#N/A	#N/A
S100A9	#N/A	S100a9	S100a9				#N/A	#N/A	#N/A
SAA1	#N/A	#N/A	#N/A				#N/A	#N/A	#N/A
SAA2	#N/A	#N/A	#N/A				#N/A	#N/A	#N/A
SAA4	#N/A	#N/A	#N/A				#N/A	#N/A	#N/A
SBSN	#N/A	#N/A	#N/A				#N/A	#N/A	#N/A
SBSPON	#N/A	#N/A	#N/A				#N/A	#N/A	#N/A
SCG2	#N/A	#N/A	#N/A				#N/A	#N/A	#N/A
SCG3	#N/A	#N/A	#N/A				#N/A	#N/A	Scg3
SCG5	#N/A	#N/A	#N/A				#N/A	#N/A	Scg5
SCGB1A1	#N/A	#N/A	#N/A				#N/A	#N/A	#N/A
SCGB1C1	#N/A	Scgb1c1	#N/A				#N/A	#N/A	#N/A
SCGB1C2	#N/A	#N/A	#N/A				#N/A	#N/A	#N/A
SCGB1D1	#N/A	#N/A	#N/A				#N/A	#N/A	#N/A
SCGB1D2	#N/A	#N/A	#N/A				#N/A	#N/A	#N/A
SCGB1D4	#N/A	#N/A	#N/A				#N/A	#N/A	#N/A
SCGB2A1	#N/A	#N/A	#N/A				#N/A	#N/A	#N/A
SCGB2A2	#N/A	#N/A	#N/A				#N/A	#N/A	#N/A
SCGB2B2	#N/A	#N/A	#N/A				#N/A	#N/A	#N/A
SCGB3A1	#N/A	Scgb3a1	#N/A				#N/A	#N/A	#N/A
SCGB3A2	#N/A	#N/A	#N/A				#N/A	#N/A	#N/A
SCPEP1	#N/A	#N/A	Scpep1				#N/A	#N/A	#N/A
SCRG1	#N/A	#N/A	#N/A				#N/A	#N/A	#N/A
SCT	#N/A	#N/A	#N/A				#N/A	#N/A	#N/A
SCUBE1	#N/A	#N/A	#N/A				#N/A	#N/A	#N/A
SCUBE2	#N/A	#N/A	#N/A				Scube2	Scube2	Scube2
SCUBE3	#N/A	#N/A	#N/A				#N/A	#N/A	#N/A
SDC1	#N/A	Sdc1	Sdc1				#N/A	#N/A	#N/A
SDC4	Sdc4	Sdc4	#N/A				#N/A	#N/A	#N/A
SECTM1	#N/A	#N/A	#N/A				#N/A	#N/A	#N/A
SELENOP	#N/A	#N/A	#N/A				#N/A	#N/A	#N/A
SEMA3A	#N/A	#N/A	#N/A				#N/A	#N/A	#N/A
SEMA3B	#N/A	#N/A	#N/A				#N/A	#N/A	#N/A
SEMA3C	#N/A	#N/A	#N/A				#N/A	#N/A	#N/A
SEMA3D	#N/A	#N/A	#N/A				#N/A	#N/A	#N/A
SEMA3E	#N/A	#N/A	#N/A				#N/A	#N/A	#N/A
SEMA3F	Sema3f	Sema3f	#N/A				#N/A	#N/A	#N/A
SEMA3G	#N/A	#N/A	#N/A				#N/A	#N/A	#N/A
SEMG1	#N/A	#N/A	#N/A				#N/A	#N/A	#N/A
SEMG2	#N/A	#N/A	#N/A				#N/A	#N/A	#N/A
SERPINA1	#N/A	#N/A	#N/A				#N/A	#N/A	#N/A
SERPINA10	#N/A	#N/A	#N/A				#N/A	#N/A	#N/A
SERPINA11	#N/A	#N/A	#N/A				#N/A	#N/A	#N/A
SERPINA12	#N/A	#N/A	#N/A				#N/A	#N/A	#N/A
SERPINA3	#N/A	#N/A	#N/A				#N/A	#N/A	#N/A
SERPINA4	#N/A	#N/A	#N/A				#N/A	#N/A	#N/A
SERPINA5	#N/A	#N/A	#N/A				Serpina5	Serpina5	Serpina5
SERPINA6	#N/A	#N/A	#N/A				#N/A	#N/A	#N/A
SERPINA7	#N/A	#N/A	#N/A				#N/A	#N/A	#N/A
SERPINA9	Serpina9	Serpina9	Serpina9				#N/A	#N/A	#N/A
SERPINC1	#N/A	#N/A	#N/A				#N/A	#N/A	#N/A
SERPIND1	#N/A	#N/A	#N/A				#N/A	#N/A	#N/A
SERPINE1	#N/A	#N/A	Serpine1				#N/A	#N/A	#N/A
SERPINE2	#N/A	#N/A	#N/A				#N/A	#N/A	#N/A
SERPINE3	#N/A	#N/A	#N/A				#N/A	#N/A	#N/A
SERPINF1	#N/A	#N/A	#N/A				#N/A	#N/A	#N/A
SERPINF2	#N/A	#N/A	#N/A				#N/A	#N/A	#N/A
SERPING1	#N/A	#N/A	#N/A				#N/A	#N/A	#N/A
SERPINI1	#N/A	#N/A	#N/A				#N/A	#N/A	#N/A
SERPINI2	#N/A	#N/A	#N/A				#N/A	#N/A	#N/A
SFN	#N/A	#N/A	Sfn				#N/A	#N/A	#N/A
SFRP1	#N/A	#N/A	#N/A				#N/A	#N/A	#N/A
SFRP2	#N/A	#N/A	#N/A				#N/A	#N/A	#N/A
SFRP4	#N/A	#N/A	#N/A				#N/A	#N/A	#N/A
SFRP5	#N/A	#N/A	#N/A				#N/A	#N/A	#N/A
SFTA2	#N/A	#N/A	#N/A				#N/A	#N/A	#N/A
SFTA3	#N/A	#N/A	#N/A				#N/A	#N/A	#N/A
SFTPA1	#N/A	#N/A	#N/A				#N/A	#N/A	#N/A
SFTPA2	#N/A	#N/A	#N/A				#N/A	#N/A	#N/A
SFTPB	#N/A	#N/A	#N/A				#N/A	#N/A	#N/A
SFTPC	#N/A	#N/A	#N/A				#N/A	#N/A	#N/A
SFTPD	Sftpd	Sftpd	Sftpd				#N/A	#N/A	#N/A
SHBG	#N/A	#N/A	#N/A				#N/A	#N/A	#N/A
SHE	#N/A	#N/A	#N/A				#N/A	#N/A	#N/A
SIRPD	#N/A	#N/A	#N/A				#N/A	#N/A	#N/A
SLAMF1	#N/A	#N/A	#N/A				#N/A	#N/A	#N/A
SLIT1	#N/A	#N/A	#N/A				#N/A	#N/A	#N/A
SLIT2	#N/A	#N/A	#N/A				#N/A	Slit2	#N/A
SLIT3	#N/A	#N/A	#N/A				#N/A	#N/A	#N/A
SLITRK1	#N/A	#N/A	#N/A				#N/A	#N/A	#N/A
SLPI	#N/A	#N/A	#N/A				#N/A	#N/A	#N/A
SLURP1	#N/A	#N/A	#N/A				#N/A	#N/A	#N/A
SLURP2	#N/A	#N/A	#N/A				#N/A	#N/A	#N/A
SMIM31	#N/A	#N/A	#N/A				#N/A	#N/A	#N/A
SMOC1	#N/A	#N/A	#N/A				#N/A	#N/A	#N/A
SMOC2	#N/A	#N/A	#N/A				#N/A	#N/A	#N/A
SMPD1	#N/A	#N/A	#N/A				#N/A	#N/A	#N/A
SMPDL3A	#N/A	#N/A	#N/A				#N/A	#N/A	#N/A
SMPDL3B	#N/A	Smpdl3b	Smpdl3b				#N/A	#N/A	#N/A
SMR3A	#N/A	#N/A	#N/A				#N/A	#N/A	#N/A
SMR3B	#N/A	#N/A	#N/A				#N/A	#N/A	#N/A
SNED1	#N/A	#N/A	#N/A				#N/A	#N/A	#N/A
SOD3	#N/A	#N/A	#N/A				#N/A	#N/A	#N/A
SOGA1	#N/A	#N/A	#N/A				#N/A	#N/A	#N/A
SORL1	#N/A	#N/A	#N/A				#N/A	#N/A	#N/A
SOST	#N/A	#N/A	#N/A				Sost	Sost	Sost
SOSTDC1	#N/A	#N/A	#N/A				#N/A	#N/A	#N/A
SPACA3	#N/A	#N/A	#N/A				#N/A	#N/A	#N/A
SPACA5	#N/A	#N/A	#N/A				#N/A	#N/A	#N/A
SPACA5B	#N/A	#N/A	#N/A				#N/A	#N/A	#N/A
SPACA7	#N/A	#N/A	#N/A				#N/A	#N/A	#N/A
SPAG11A	#N/A	#N/A	#N/A				#N/A	#N/A	#N/A
SPAG11B	#N/A	#N/A	#N/A				#N/A	#N/A	#N/A
SPARC	#N/A	#N/A	#N/A				#N/A	#N/A	#N/A
SPARCL1	#N/A	#N/A	#N/A				#N/A	#N/A	#N/A
SPATA20	#N/A	#N/A	#N/A				#N/A	#N/A	#N/A
SPINK1	#N/A	#N/A	#N/A				#N/A	#N/A	#N/A
SPINK13	#N/A	#N/A	#N/A				#N/A	#N/A	#N/A
SPINK14	#N/A	#N/A	#N/A				#N/A	#N/A	#N/A
SPINK2	#N/A	#N/A	#N/A				#N/A	#N/A	#N/A
SPINK4	#N/A	#N/A	#N/A				#N/A	#N/A	#N/A
SPINK5	Spink5	Spink5	#N/A				#N/A	#N/A	#N/A
SPINK6	#N/A	#N/A	#N/A				#N/A	#N/A	#N/A
SPINK7	#N/A	#N/A	#N/A				#N/A	#N/A	#N/A
SPINK8	#N/A	#N/A	#N/A				#N/A	#N/A	#N/A
SPINK9	#N/A	#N/A	#N/A				#N/A	#N/A	#N/A
SPINT1	Spint1	Spint1	#N/A				#N/A	#N/A	#N/A
SPINT3	#N/A	#N/A	#N/A				#N/A	#N/A	#N/A
SPINT4	#N/A	#N/A	#N/A				#N/A	#N/A	#N/A
SPOCK1	#N/A	#N/A	#N/A				#N/A	#N/A	#N/A
SPOCK2	#N/A	#N/A	#N/A				#N/A	Spock2	#N/A
SPOCK3	#N/A	#N/A	#N/A				#N/A	#N/A	#N/A
SPON1	#N/A	#N/A	#N/A				#N/A	#N/A	#N/A
SPON2	#N/A	#N/A	#N/A				#N/A	#N/A	#N/A
SPP1	#N/A	#N/A	#N/A				#N/A	#N/A	#N/A
SPP2	#N/A	#N/A	#N/A				#N/A	#N/A	#N/A
SPTY2D1OS	#N/A	#N/A	#N/A				#N/A	#N/A	#N/A
SPX	#N/A	#N/A	#N/A				#N/A	#N/A	#N/A
SRPX	#N/A	#N/A	#N/A				#N/A	#N/A	#N/A
SRPX2	#N/A	#N/A	#N/A				#N/A	#N/A	#N/A
SSC4D	#N/A	#N/A	#N/A				#N/A	#N/A	#N/A
SSC5D	#N/A	#N/A	#N/A				#N/A	#N/A	#N/A
SSPO	Sspo	Sspo	Sspo				#N/A	#N/A	#N/A
SST	#N/A	#N/A	#N/A				#N/A	#N/A	#N/A
ST6GAL1	#N/A	#N/A	#N/A				#N/A	#N/A	#N/A
STATH	#N/A	#N/A	#N/A				#N/A	#N/A	#N/A
STC1	#N/A	#N/A	#N/A				#N/A	#N/A	#N/A
STC2	Stc2	Stc2	#N/A				#N/A	#N/A	#N/A
SVBP	#N/A	#N/A	#N/A				#N/A	#N/A	#N/A
TAC1	#N/A	Tac1	#N/A				#N/A	#N/A	#N/A
TAC3	#N/A	#N/A	#N/A				#N/A	#N/A	#N/A
TAC4	#N/A	#N/A	#N/A				#N/A	#N/A	#N/A
TBL2	#N/A	#N/A	#N/A				#N/A	#N/A	#N/A
TCN1	#N/A	#N/A	#N/A				#N/A	#N/A	#N/A
TCN2	#N/A	#N/A	#N/A				#N/A	#N/A	#N/A
TDGF1	#N/A	#N/A	#N/A				#N/A	#N/A	#N/A
TECTA	#N/A	#N/A	#N/A				#N/A	#N/A	#N/A
TECTB	#N/A	#N/A	#N/A				#N/A	#N/A	#N/A
TEK	#N/A	#N/A	#N/A				#N/A	#N/A	#N/A
TEPP	#N/A	#N/A	#N/A				#N/A	#N/A	#N/A
TEX101	#N/A	#N/A	#N/A				#N/A	#N/A	#N/A
TEX264	#N/A	#N/A	#N/A				#N/A	#N/A	#N/A
TF	#N/A	#N/A	#N/A				#N/A	#N/A	#N/A
TFF1	#N/A	#N/A	#N/A				#N/A	#N/A	#N/A
TFF2	#N/A	Tff2	#N/A				#N/A	#N/A	#N/A
TFF3	Tff3	Tff3	Tff3				#N/A	#N/A	#N/A
TFPI	#N/A	#N/A	#N/A				#N/A	#N/A	#N/A
TFPI2	#N/A	#N/A	#N/A				#N/A	#N/A	#N/A
TFRC	Tfrc	Tfrc	Tfrc				#N/A	#N/A	#N/A
TG	#N/A	#N/A	#N/A				#N/A	#N/A	#N/A
TGFA	#N/A	#N/A	#N/A				#N/A	#N/A	#N/A
TGFB1	#N/A	#N/A	Tgfb1				#N/A	#N/A	#N/A
TGFB2	#N/A	#N/A	#N/A				Tgfb2	Tgfb2	#N/A
TGFB3	#N/A	#N/A	#N/A				#N/A	#N/A	#N/A
TGFBI	#N/A	#N/A	#N/A				#N/A	#N/A	#N/A
TGFBR3	#N/A	#N/A	#N/A				#N/A	Tgfbr3	#N/A
THBS1	Thbs1	Thbs1	Thbs1				#N/A	#N/A	#N/A
THBS2	#N/A	#N/A	#N/A				#N/A	#N/A	#N/A
THBS3	#N/A	#N/A	#N/A				#N/A	#N/A	#N/A
THBS4	#N/A	#N/A	#N/A				#N/A	#N/A	#N/A
THEM6	#N/A	#N/A	#N/A				#N/A	#N/A	#N/A
THNSL2	#N/A	#N/A	#N/A				#N/A	#N/A	#N/A
THPO	#N/A	#N/A	Thpo				#N/A	#N/A	#N/A
THSD4	#N/A	#N/A	#N/A				#N/A	#N/A	#N/A
THSD7A	#N/A	#N/A	#N/A				#N/A	#N/A	#N/A
TIMP1	Timp1	Timp1	Timp1				#N/A	#N/A	#N/A
TIMP2	#N/A	#N/A	Timp2				#N/A	#N/A	#N/A
TIMP3	#N/A	#N/A	#N/A				#N/A	#N/A	#N/A
TIMP4	Timp4	Timp4	#N/A				#N/A	#N/A	Timp4
TINAG	#N/A	#N/A	Tinag				#N/A	#N/A	#N/A
TINAGL1	#N/A	#N/A	#N/A				#N/A	#N/A	#N/A
TLL1	#N/A	#N/A	#N/A				Tll1	Tll1	#N/A
TLL2	#N/A	#N/A	#N/A				#N/A	#N/A	#N/A
TMEFF2	#N/A	#N/A	#N/A				#N/A	#N/A	#N/A
TMEM155	#N/A	#N/A	#N/A				#N/A	#N/A	#N/A
TNC	#N/A	#N/A	#N/A				#N/A	#N/A	#N/A
TNF	Tnf	Tnf	Tnf				#N/A	#N/A	#N/A
TNFAIP6	#N/A	#N/A	#N/A				#N/A	#N/A	#N/A
TNFRSF11B	#N/A	#N/A	Tnfrsf11b				#N/A	#N/A	#N/A
TNFRSF18	#N/A	#N/A	#N/A				#N/A	#N/A	#N/A
TNFRSF1A	#N/A	#N/A	#N/A				#N/A	#N/A	#N/A
TNFRSF1B	#N/A	#N/A	Tnfrsf1b				#N/A	#N/A	#N/A
TNFRSF25	#N/A	#N/A	Tnfrsf25				#N/A	#N/A	#N/A
TNFRSF6B	#N/A	#N/A	#N/A				#N/A	#N/A	#N/A
TNFSF10	Tnfsf10	Tnfsf10	Tnfsf10				#N/A	#N/A	#N/A
TNFSF11	#N/A	#N/A	#N/A				#N/A	#N/A	#N/A
TNFSF12	#N/A	#N/A	#N/A				#N/A	Tnfsf12	#N/A
TNFSF13	#N/A	#N/A	#N/A				#N/A	#N/A	#N/A
TNFSF13B	#N/A	#N/A	Tnfsf13b				#N/A	#N/A	#N/A
TNFSF14	#N/A	#N/A	#N/A				#N/A	#N/A	#N/A
TNFSF15	#N/A	#N/A	#N/A				#N/A	#N/A	#N/A
TNN	#N/A	#N/A	#N/A				#N/A	#N/A	#N/A
TNR	#N/A	#N/A	#N/A				#N/A	#N/A	#N/A
TNXB	#N/A	#N/A	#N/A				#N/A	#N/A	#N/A
TOR2A	#N/A	#N/A	#N/A				#N/A	#N/A	#N/A
TPSAB1	#N/A	#N/A	#N/A				#N/A	#N/A	#N/A
TPSB2	#N/A	#N/A	#N/A				#N/A	Tpsb2	Tpsb2
TREML4	#N/A	#N/A	#N/A				#N/A	#N/A	#N/A
TRH	#N/A	#N/A	#N/A				#N/A	#N/A	#N/A
TSHB	#N/A	#N/A	#N/A				#N/A	#N/A	#N/A
TSKU	#N/A	#N/A	Tsku				#N/A	#N/A	#N/A
TSLP	#N/A	#N/A	#N/A				#N/A	#N/A	#N/A
TSPEAR	#N/A	#N/A	#N/A				#N/A	#N/A	#N/A
TTC9B	#N/A	#N/A	#N/A				#N/A	#N/A	#N/A
TTR	#N/A	Ttr	#N/A				#N/A	#N/A	#N/A
TUFT1	#N/A	#N/A	#N/A				#N/A	#N/A	#N/A
TULP2	#N/A	#N/A	#N/A				Tulp2	Tulp2	Tulp2
TULP3	#N/A	#N/A	#N/A				#N/A	Tulp3	#N/A
TWSG1	#N/A	#N/A	#N/A				#N/A	#N/A	#N/A
TXNDC16	#N/A	#N/A	#N/A				#N/A	#N/A	#N/A
UCMA	#N/A	#N/A	#N/A				#N/A	#N/A	#N/A
UCN	#N/A	#N/A	#N/A				#N/A	#N/A	#N/A
UCN2	#N/A	#N/A	#N/A				#N/A	#N/A	#N/A
UCN3	#N/A	#N/A	#N/A				#N/A	#N/A	#N/A
ULBP2	#N/A	#N/A	#N/A				#N/A	#N/A	#N/A
UMOD	#N/A	#N/A	#N/A				#N/A	#N/A	#N/A
UTS2	#N/A	#N/A	#N/A				#N/A	#N/A	#N/A
UTS2B	#N/A	#N/A	#N/A				#N/A	#N/A	#N/A
VASH1	#N/A	#N/A	#N/A				#N/A	#N/A	#N/A
VASH2	#N/A	#N/A	#N/A				#N/A	#N/A	#N/A
VASN	#N/A	#N/A	Vasn				#N/A	#N/A	#N/A
VCAN	#N/A	#N/A	Vcan				#N/A	#N/A	#N/A
VEGFA	#N/A	#N/A	#N/A				#N/A	#N/A	#N/A
VEGFB	#N/A	#N/A	#N/A				#N/A	#N/A	#N/A
VEGFC	#N/A	#N/A	#N/A				#N/A	#N/A	#N/A
VEGFD	#N/A	#N/A	#N/A				#N/A	#N/A	#N/A
VGF	#N/A	#N/A	#N/A				#N/A	#N/A	#N/A
VIP	#N/A	#N/A	#N/A				#N/A	#N/A	#N/A
VIT	#N/A	#N/A	#N/A				#N/A	#N/A	#N/A
VMO1	#N/A	#N/A	#N/A				#N/A	#N/A	#N/A
VNN3	#N/A	#N/A	#N/A				#N/A	#N/A	#N/A
VSTM1	#N/A	#N/A	#N/A				#N/A	#N/A	#N/A
VSTM2A	#N/A	#N/A	#N/A				#N/A	#N/A	#N/A
VSTM2L	#N/A	#N/A	#N/A				#N/A	#N/A	#N/A
VSTM4	#N/A	#N/A	Vstm4				#N/A	#N/A	#N/A
VTN	#N/A	#N/A	#N/A				#N/A	#N/A	#N/A
VWA1	#N/A	#N/A	#N/A				#N/A	Vwa1	#N/A
VWA2	#N/A	#N/A	#N/A				Vwa2	#N/A	Vwa2
VWA3A	#N/A	#N/A	#N/A				#N/A	#N/A	#N/A
VWA5B1	#N/A	#N/A	#N/A				#N/A	#N/A	#N/A
VWA7	#N/A	#N/A	#N/A				#N/A	#N/A	#N/A
VWC2	#N/A	#N/A	#N/A				#N/A	#N/A	#N/A
VWC2L	#N/A	#N/A	#N/A				#N/A	#N/A	#N/A
VWCE	#N/A	#N/A	#N/A				#N/A	#N/A	#N/A
VWDE	#N/A	#N/A	#N/A				#N/A	#N/A	#N/A
VWF	#N/A	#N/A	#N/A				#N/A	#N/A	#N/A
WDR25	#N/A	#N/A	#N/A				#N/A	#N/A	#N/A
WFDC1	#N/A	#N/A	#N/A				#N/A	#N/A	#N/A
WFDC10A	#N/A	#N/A	#N/A				#N/A	#N/A	#N/A
WFDC10B	#N/A	#N/A	#N/A				#N/A	#N/A	#N/A
WFDC11	#N/A	#N/A	#N/A				#N/A	#N/A	#N/A
WFDC12	#N/A	#N/A	#N/A				#N/A	#N/A	#N/A
WFDC13	#N/A	#N/A	#N/A				#N/A	#N/A	#N/A
WFDC2	Wfdc2	Wfdc2	Wfdc2				#N/A	#N/A	#N/A
WFDC3	#N/A	#N/A	#N/A				#N/A	#N/A	#N/A
WFDC5	#N/A	#N/A	#N/A				#N/A	#N/A	#N/A
WFDC6	#N/A	#N/A	#N/A				#N/A	#N/A	#N/A
WFDC8	#N/A	#N/A	#N/A				#N/A	Wfdc8	#N/A
WFDC9	#N/A	#N/A	#N/A				#N/A	#N/A	#N/A
WFIKKN1	#N/A	#N/A	#N/A				#N/A	#N/A	#N/A
WFIKKN2	#N/A	#N/A	#N/A				#N/A	#N/A	#N/A
WIF1	#N/A	#N/A	#N/A				Wif1	Wif1	#N/A
WISP1	#N/A	#N/A	#N/A				#N/A	#N/A	#N/A
WISP2	#N/A	#N/A	#N/A				#N/A	#N/A	#N/A
WISP3	#N/A	#N/A	#N/A				#N/A	#N/A	#N/A
WNT1	#N/A	#N/A	#N/A				#N/A	#N/A	#N/A
WNT10A	#N/A	#N/A	#N/A				#N/A	#N/A	#N/A
WNT10B	#N/A	#N/A	#N/A				#N/A	#N/A	#N/A
WNT11	#N/A	#N/A	Wnt11				#N/A	#N/A	#N/A
WNT16	#N/A	#N/A	Wnt16				#N/A	#N/A	#N/A
WNT2	#N/A	#N/A	Wnt2				#N/A	#N/A	#N/A
WNT2B	#N/A	#N/A	#N/A				Wnt2b	#N/A	#N/A
WNT3	#N/A	#N/A	#N/A				#N/A	#N/A	#N/A
WNT3A	#N/A	#N/A	#N/A				#N/A	#N/A	#N/A
WNT4	Wnt4	Wnt4	Wnt4				#N/A	#N/A	#N/A
WNT5A	#N/A	#N/A	#N/A				#N/A	#N/A	#N/A
WNT5B	#N/A	#N/A	#N/A				#N/A	#N/A	#N/A
WNT6	#N/A	#N/A	#N/A				#N/A	#N/A	#N/A
WNT7A	#N/A	#N/A	Wnt7a				#N/A	#N/A	#N/A
WNT7B	#N/A	#N/A	#N/A				#N/A	#N/A	#N/A
WNT8A	#N/A	#N/A	#N/A				#N/A	#N/A	#N/A
WNT8B	#N/A	#N/A	#N/A				#N/A	#N/A	#N/A
WNT9A	#N/A	#N/A	#N/A				#N/A	#N/A	#N/A
WNT9B	#N/A	#N/A	#N/A				#N/A	#N/A	#N/A
XCL1	#N/A	#N/A	Xcl1				#N/A	#N/A	#N/A
XCL2	#N/A	#N/A	#N/A				#N/A	#N/A	#N/A
XYLT1	#N/A	#N/A	#N/A				#N/A	#N/A	#N/A
XYLT2	#N/A	#N/A	#N/A				#N/A	#N/A	#N/A
ZG16	#N/A	#N/A	#N/A				#N/A	#N/A	#N/A
ZG16B	#N/A	#N/A	#N/A				#N/A	#N/A	#N/A
ZP1	#N/A	#N/A	#N/A				#N/A	#N/A	#N/A
ZP2	#N/A	#N/A	#N/A				#N/A	#N/A	#N/A
ZP3	#N/A	#N/A	#N/A				#N/A	#N/A	#N/A
ZP4	#N/A	#N/A	#N/A				#N/A	#N/A	#N/A
ZPBP	#N/A	#N/A	Zpbp				#N/A	#N/A	#N/A
ZPBP2	#N/A	#N/A	#N/A				#N/A	#N/A	Zpbp2

## Sheet: LP
PROTEIN CLASS	PTEN - Up						PTEN - Down
Gene	PIN	MED	ADV				PIN	MED	ADV
A1BG	#N/A	#N/A	#N/A				#N/A	#N/A	#N/A
A2M	#N/A	#N/A	#N/A				#N/A	#N/A	#N/A
A2ML1	#N/A	#N/A	#N/A				#N/A	#N/A	#N/A
AADACL2	#N/A	#N/A	#N/A				#N/A	#N/A	#N/A
ABHD15	#N/A	#N/A	#N/A				#N/A	#N/A	#N/A
ABI3BP	#N/A	#N/A	#N/A				#N/A	#N/A	#N/A
ABO	#N/A	#N/A	#N/A				Abo	Abo	Abo
AC008687.1	#N/A	#N/A	#N/A				#N/A	#N/A	#N/A
AC233755.1	#N/A	#N/A	#N/A				#N/A	#N/A	#N/A
ACAN	#N/A	#N/A	#N/A				#N/A	#N/A	#N/A
ACE	#N/A	#N/A	#N/A				#N/A	#N/A	Ace
ACE2	#N/A	#N/A	#N/A				#N/A	#N/A	#N/A
ACP7	#N/A	#N/A	#N/A				#N/A	#N/A	#N/A
ACPP	#N/A	#N/A	#N/A				#N/A	#N/A	#N/A
ACR	#N/A	#N/A	#N/A				#N/A	#N/A	#N/A
ADA2	#N/A	#N/A	#N/A				#N/A	#N/A	#N/A
ADAM12	#N/A	Adam12	Adam12				#N/A	#N/A	#N/A
ADAM28	#N/A	#N/A	#N/A				#N/A	Adam28	Adam28
ADAM9	#N/A	#N/A	#N/A				#N/A	#N/A	#N/A
ADAMDEC1	#N/A	#N/A	#N/A				#N/A	#N/A	#N/A
ADAMTS1	#N/A	#N/A	#N/A				#N/A	#N/A	#N/A
ADAMTS10	#N/A	#N/A	Adamts10				#N/A	#N/A	#N/A
ADAMTS12	#N/A	#N/A	#N/A				#N/A	#N/A	#N/A
ADAMTS13	#N/A	#N/A	#N/A				#N/A	#N/A	#N/A
ADAMTS14	#N/A	#N/A	#N/A				#N/A	#N/A	#N/A
ADAMTS15	#N/A	Adamts15	Adamts15				#N/A	#N/A	#N/A
ADAMTS16	#N/A	#N/A	#N/A				#N/A	#N/A	#N/A
ADAMTS17	#N/A	#N/A	#N/A				#N/A	#N/A	#N/A
ADAMTS18	#N/A	#N/A	#N/A				#N/A	#N/A	#N/A
ADAMTS19	#N/A	#N/A	#N/A				#N/A	#N/A	#N/A
ADAMTS2	#N/A	#N/A	#N/A				#N/A	#N/A	#N/A
ADAMTS20	#N/A	#N/A	#N/A				#N/A	#N/A	#N/A
ADAMTS3	#N/A	#N/A	#N/A				#N/A	#N/A	#N/A
ADAMTS4	#N/A	Adamts4	Adamts4				#N/A	#N/A	#N/A
ADAMTS5	#N/A	#N/A	#N/A				#N/A	#N/A	#N/A
ADAMTS6	#N/A	#N/A	#N/A				#N/A	#N/A	#N/A
ADAMTS7	#N/A	#N/A	Adamts7				#N/A	#N/A	#N/A
ADAMTS8	#N/A	#N/A	#N/A				Adamts8	Adamts8	Adamts8
ADAMTS9	#N/A	#N/A	#N/A				#N/A	#N/A	#N/A
ADAMTSL1	#N/A	#N/A	#N/A				#N/A	#N/A	#N/A
ADAMTSL2	#N/A	#N/A	#N/A				#N/A	#N/A	#N/A
ADAMTSL3	#N/A	#N/A	#N/A				#N/A	#N/A	#N/A
ADAMTSL4	#N/A	#N/A	#N/A				#N/A	#N/A	#N/A
ADAMTSL5	#N/A	#N/A	#N/A				#N/A	#N/A	#N/A
ADCK1	#N/A	#N/A	#N/A				#N/A	#N/A	#N/A
ADCYAP1	#N/A	#N/A	#N/A				#N/A	#N/A	#N/A
ADGRB1	#N/A	#N/A	#N/A				#N/A	#N/A	#N/A
ADGRE3	#N/A	#N/A	#N/A				#N/A	#N/A	#N/A
ADGRE5	#N/A	#N/A	#N/A				#N/A	#N/A	#N/A
ADGRF1	#N/A	#N/A	#N/A				#N/A	#N/A	#N/A
ADGRG1	#N/A	#N/A	#N/A				#N/A	#N/A	#N/A
ADIPOQ	#N/A	#N/A	#N/A				#N/A	#N/A	Adipoq
ADM	#N/A	#N/A	#N/A				#N/A	#N/A	#N/A
ADM2	Adm2	Adm2	Adm2				#N/A	#N/A	#N/A
ADM5	#N/A	#N/A	#N/A				#N/A	#N/A	#N/A
AEBP1	#N/A	#N/A	#N/A				#N/A	#N/A	#N/A
AFM	#N/A	#N/A	#N/A				#N/A	#N/A	#N/A
AFP	#N/A	#N/A	#N/A				#N/A	#N/A	#N/A
AGER	#N/A	#N/A	Ager				#N/A	#N/A	#N/A
AGGF1	#N/A	#N/A	#N/A				#N/A	#N/A	#N/A
AGRN	#N/A	#N/A	#N/A				#N/A	#N/A	#N/A
AGRP	#N/A	#N/A	#N/A				#N/A	#N/A	#N/A
AGT	#N/A	Agt	#N/A				#N/A	#N/A	#N/A
AHSG	#N/A	#N/A	#N/A				#N/A	#N/A	#N/A
AIMP1	#N/A	#N/A	#N/A				#N/A	#N/A	#N/A
AKR1B10	#N/A	#N/A	#N/A				#N/A	#N/A	#N/A
ALB	#N/A	#N/A	#N/A				#N/A	#N/A	#N/A
ALKAL1	#N/A	#N/A	#N/A				#N/A	#N/A	#N/A
ALKAL2	#N/A	#N/A	#N/A				#N/A	#N/A	#N/A
AMBN	#N/A	#N/A	#N/A				#N/A	#N/A	#N/A
AMBP	#N/A	#N/A	#N/A				#N/A	#N/A	#N/A
AMELX	#N/A	#N/A	#N/A				#N/A	#N/A	#N/A
AMELY	#N/A	#N/A	#N/A				#N/A	#N/A	#N/A
AMH	#N/A	#N/A	#N/A				#N/A	#N/A	#N/A
AMTN	#N/A	#N/A	#N/A				#N/A	#N/A	#N/A
AMY1A	#N/A	#N/A	#N/A				#N/A	#N/A	#N/A
AMY1B	#N/A	#N/A	#N/A				#N/A	#N/A	#N/A
AMY1C	#N/A	#N/A	#N/A				#N/A	#N/A	#N/A
AMY2A	#N/A	#N/A	#N/A				#N/A	#N/A	#N/A
AMY2B	#N/A	#N/A	#N/A				#N/A	#N/A	#N/A
ANG	#N/A	#N/A	#N/A				#N/A	#N/A	#N/A
ANGPT1	#N/A	#N/A	#N/A				#N/A	#N/A	#N/A
ANGPT2	#N/A	#N/A	#N/A				#N/A	#N/A	#N/A
ANGPT4	#N/A	#N/A	#N/A				#N/A	#N/A	#N/A
ANGPTL1	#N/A	#N/A	#N/A				Angptl1	#N/A	#N/A
ANGPTL2	#N/A	#N/A	#N/A				#N/A	#N/A	#N/A
ANGPTL3	#N/A	#N/A	#N/A				#N/A	#N/A	#N/A
ANGPTL4	#N/A	#N/A	#N/A				#N/A	#N/A	#N/A
ANGPTL5	#N/A	#N/A	#N/A				#N/A	#N/A	#N/A
ANGPTL6	#N/A	#N/A	#N/A				#N/A	#N/A	#N/A
ANGPTL7	#N/A	#N/A	#N/A				Angptl7	#N/A	#N/A
ANGPTL8	#N/A	#N/A	#N/A				#N/A	#N/A	#N/A
ANKDD1A	#N/A	#N/A	#N/A				#N/A	#N/A	#N/A
ANOS1	#N/A	#N/A	#N/A				#N/A	#N/A	#N/A
ANXA1	Anxa1	Anxa1	Anxa1				#N/A	#N/A	#N/A
ANXA2	Anxa2	Anxa2	Anxa2				#N/A	#N/A	#N/A
AOAH	#N/A	#N/A	Aoah				#N/A	#N/A	#N/A
AOC1	#N/A	#N/A	#N/A				#N/A	#N/A	#N/A
AOC3	#N/A	#N/A	#N/A				Aoc3	#N/A	#N/A
AP000790.4	#N/A	#N/A	#N/A				#N/A	#N/A	#N/A
AP002347.1	#N/A	#N/A	#N/A				#N/A	#N/A	#N/A
APCS	#N/A	#N/A	#N/A				#N/A	#N/A	#N/A
APELA	#N/A	#N/A	#N/A				#N/A	#N/A	#N/A
APLN	Apln	Apln	Apln				#N/A	#N/A	#N/A
APOA1	#N/A	#N/A	#N/A				#N/A	#N/A	#N/A
APOA2	#N/A	#N/A	#N/A				#N/A	#N/A	#N/A
APOA4	#N/A	#N/A	#N/A				#N/A	#N/A	#N/A
APOA5	#N/A	#N/A	#N/A				#N/A	#N/A	#N/A
APOB	#N/A	Apob	Apob				#N/A	#N/A	#N/A
APOC1	#N/A	#N/A	#N/A				Apoc1	Apoc1	Apoc1
APOC2	#N/A	Apoc2	Apoc2				#N/A	#N/A	#N/A
APOC3	#N/A	#N/A	#N/A				#N/A	#N/A	#N/A
APOC4	#N/A	#N/A	#N/A				#N/A	#N/A	#N/A
APOD	#N/A	#N/A	#N/A				Apod	#N/A	Apod
APOE	#N/A	#N/A	#N/A				#N/A	#N/A	#N/A
APOF	#N/A	#N/A	#N/A				Apof	Apof	Apof
APOH	#N/A	#N/A	#N/A				#N/A	#N/A	#N/A
APOL1	#N/A	#N/A	#N/A				#N/A	#N/A	#N/A
APOL4	#N/A	#N/A	#N/A				#N/A	#N/A	#N/A
APOM	#N/A	#N/A	#N/A				#N/A	#N/A	#N/A
APOO	#N/A	#N/A	#N/A				#N/A	#N/A	#N/A
ARSF	#N/A	#N/A	#N/A				#N/A	#N/A	#N/A
ARSI	#N/A	#N/A	#N/A				#N/A	#N/A	#N/A
ARSJ	#N/A	#N/A	#N/A				#N/A	#N/A	#N/A
ARSK	#N/A	#N/A	#N/A				#N/A	#N/A	#N/A
ART4	#N/A	#N/A	#N/A				#N/A	Art4	Art4
ART5	#N/A	#N/A	#N/A				#N/A	#N/A	#N/A
ARTN	#N/A	#N/A	#N/A				#N/A	#N/A	#N/A
ASIP	#N/A	#N/A	#N/A				#N/A	#N/A	#N/A
ASPN	#N/A	#N/A	#N/A				Aspn	#N/A	#N/A
ASTL	#N/A	#N/A	#N/A				#N/A	#N/A	#N/A
ATRN	#N/A	#N/A	#N/A				#N/A	#N/A	#N/A
AVP	#N/A	#N/A	#N/A				#N/A	#N/A	#N/A
AZGP1	#N/A	#N/A	#N/A				Azgp1	Azgp1	Azgp1
AZU1	#N/A	#N/A	#N/A				#N/A	#N/A	#N/A
B3GAT1	#N/A	#N/A	#N/A				#N/A	#N/A	#N/A
BCAN	#N/A	#N/A	#N/A				#N/A	#N/A	#N/A
BCHE	#N/A	#N/A	#N/A				#N/A	#N/A	#N/A
BDNF	#N/A	Bdnf	Bdnf				#N/A	#N/A	#N/A
BGLAP	#N/A	#N/A	#N/A				#N/A	#N/A	#N/A
BGN	#N/A	#N/A	#N/A				#N/A	#N/A	#N/A
BMP1	#N/A	#N/A	Bmp1				#N/A	#N/A	#N/A
BMP10	#N/A	#N/A	#N/A				#N/A	#N/A	#N/A
BMP15	#N/A	#N/A	#N/A				#N/A	#N/A	#N/A
BMP2	#N/A	#N/A	#N/A				#N/A	#N/A	#N/A
BMP3	#N/A	#N/A	#N/A				#N/A	#N/A	#N/A
BMP4	#N/A	#N/A	#N/A				#N/A	#N/A	#N/A
BMP5	#N/A	#N/A	#N/A				#N/A	Bmp5	#N/A
BMP6	#N/A	#N/A	#N/A				#N/A	#N/A	#N/A
BMP7	#N/A	#N/A	#N/A				Bmp7	Bmp7	Bmp7
BMP8A	#N/A	#N/A	#N/A				#N/A	#N/A	#N/A
BMP8B	#N/A	#N/A	#N/A				Bmp8b	Bmp8b	Bmp8b
BMPER	#N/A	#N/A	#N/A				#N/A	#N/A	#N/A
BPI	#N/A	#N/A	#N/A				#N/A	#N/A	#N/A
BPIFA1	#N/A	#N/A	#N/A				#N/A	#N/A	#N/A
BPIFA2	#N/A	#N/A	#N/A				#N/A	#N/A	#N/A
BPIFA3	#N/A	#N/A	#N/A				#N/A	#N/A	#N/A
BPIFB1	#N/A	#N/A	#N/A				#N/A	#N/A	#N/A
BPIFB4	#N/A	#N/A	#N/A				#N/A	#N/A	#N/A
BPIFC	#N/A	#N/A	#N/A				#N/A	#N/A	#N/A
BRINP2	#N/A	#N/A	#N/A				#N/A	#N/A	#N/A
BRINP3	#N/A	#N/A	#N/A				#N/A	#N/A	#N/A
BSPH1	#N/A	#N/A	#N/A				#N/A	#N/A	#N/A
BTBD17	Btbd17	Btbd17	Btbd17				#N/A	#N/A	#N/A
BTC	Btc	Btc	Btc				#N/A	#N/A	#N/A
BTD	#N/A	#N/A	#N/A				#N/A	#N/A	#N/A
BTN1A1	#N/A	#N/A	#N/A				#N/A	#N/A	#N/A
BX248415.1	#N/A	#N/A	#N/A				#N/A	#N/A	#N/A
C10orf95	#N/A	#N/A	#N/A				#N/A	#N/A	#N/A
C10orf99	#N/A	#N/A	#N/A				#N/A	#N/A	#N/A
C11orf45	#N/A	#N/A	#N/A				#N/A	#N/A	#N/A
C11orf94	#N/A	#N/A	#N/A				#N/A	#N/A	#N/A
C12orf49	#N/A	#N/A	#N/A				#N/A	#N/A	#N/A
C12orf73	#N/A	#N/A	#N/A				#N/A	#N/A	#N/A
C14orf93	#N/A	#N/A	#N/A				#N/A	#N/A	#N/A
C15orf61	#N/A	#N/A	#N/A				#N/A	#N/A	#N/A
C16orf89	#N/A	#N/A	#N/A				#N/A	#N/A	#N/A
C17orf67	#N/A	#N/A	#N/A				#N/A	#N/A	#N/A
C17orf99	#N/A	#N/A	#N/A				#N/A	#N/A	#N/A
C18orf54	#N/A	#N/A	#N/A				#N/A	#N/A	#N/A
C1orf54	#N/A	#N/A	#N/A				#N/A	#N/A	#N/A
C1orf56	#N/A	#N/A	#N/A				#N/A	#N/A	#N/A
C1QA	#N/A	C1qa	C1qa				#N/A	#N/A	#N/A
C1QB	#N/A	C1qb	C1qb				#N/A	#N/A	#N/A
C1QC	#N/A	#N/A	C1qc				#N/A	#N/A	#N/A
C1QL1	#N/A	#N/A	#N/A				#N/A	#N/A	#N/A
C1QL2	#N/A	#N/A	#N/A				#N/A	#N/A	#N/A
C1QL3	#N/A	#N/A	#N/A				#N/A	C1ql3	#N/A
C1QL4	#N/A	#N/A	#N/A				#N/A	#N/A	#N/A
C1QTNF1	#N/A	#N/A	#N/A				#N/A	#N/A	#N/A
C1QTNF12	#N/A	#N/A	#N/A				#N/A	#N/A	#N/A
C1QTNF2	#N/A	#N/A	#N/A				#N/A	#N/A	#N/A
C1QTNF3	#N/A	#N/A	#N/A				#N/A	#N/A	#N/A
C1QTNF4	#N/A	#N/A	#N/A				#N/A	#N/A	#N/A
C1QTNF5	#N/A	#N/A	#N/A				#N/A	#N/A	#N/A
C1QTNF6	#N/A	#N/A	#N/A				#N/A	#N/A	#N/A
C1QTNF7	#N/A	#N/A	#N/A				#N/A	#N/A	#N/A
C1QTNF8	#N/A	#N/A	#N/A				#N/A	#N/A	#N/A
C1QTNF9	#N/A	#N/A	#N/A				C1qtnf9	C1qtnf9	#N/A
C1QTNF9B	#N/A	#N/A	#N/A				#N/A	#N/A	#N/A
C1R	#N/A	#N/A	#N/A				#N/A	#N/A	#N/A
C1RL	#N/A	#N/A	#N/A				C1rl	#N/A	#N/A
C1S	#N/A	#N/A	#N/A				#N/A	#N/A	#N/A
C2	#N/A	C2	#N/A				#N/A	#N/A	#N/A
C21orf62	#N/A	#N/A	#N/A				#N/A	#N/A	#N/A
C22orf15	#N/A	#N/A	#N/A				#N/A	#N/A	#N/A
C22orf46	#N/A	#N/A	#N/A				#N/A	#N/A	#N/A
C2orf40	#N/A	#N/A	#N/A				#N/A	#N/A	#N/A
C2orf66	#N/A	#N/A	#N/A				#N/A	#N/A	#N/A
C2orf69	#N/A	#N/A	#N/A				#N/A	#N/A	#N/A
C3	#N/A	C3	C3				#N/A	#N/A	#N/A
C3orf33	#N/A	#N/A	#N/A				#N/A	#N/A	#N/A
C3orf58	#N/A	#N/A	#N/A				#N/A	#N/A	#N/A
C4A	#N/A	C4a	#N/A				#N/A	#N/A	#N/A
C4B	#N/A	C4b	#N/A				#N/A	#N/A	#N/A
C4BPA	#N/A	#N/A	#N/A				#N/A	#N/A	#N/A
C4BPB	#N/A	#N/A	#N/A				#N/A	#N/A	#N/A
C4orf48	#N/A	#N/A	#N/A				#N/A	#N/A	#N/A
C5	#N/A	#N/A	#N/A				#N/A	#N/A	#N/A
C5orf38	#N/A	#N/A	#N/A				#N/A	#N/A	#N/A
C5orf46	#N/A	#N/A	#N/A				#N/A	#N/A	#N/A
C6	#N/A	#N/A	#N/A				#N/A	#N/A	#N/A
C6orf120	#N/A	#N/A	#N/A				#N/A	#N/A	#N/A
C6orf15	#N/A	#N/A	#N/A				#N/A	#N/A	#N/A
C6orf58	#N/A	#N/A	#N/A				#N/A	#N/A	#N/A
C7	#N/A	#N/A	#N/A				#N/A	#N/A	#N/A
C8A	#N/A	#N/A	#N/A				#N/A	#N/A	#N/A
C8B	#N/A	#N/A	#N/A				#N/A	#N/A	#N/A
C8G	#N/A	#N/A	#N/A				#N/A	#N/A	#N/A
C9	#N/A	#N/A	#N/A				#N/A	#N/A	#N/A
C9orf47	#N/A	#N/A	#N/A				#N/A	#N/A	#N/A
C9orf72	#N/A	#N/A	#N/A				#N/A	#N/A	#N/A
CA10	#N/A	#N/A	#N/A				#N/A	#N/A	#N/A
CA11	#N/A	#N/A	#N/A				#N/A	#N/A	#N/A
CA6	#N/A	#N/A	#N/A				#N/A	#N/A	#N/A
CALCA	#N/A	Calca	Calca				#N/A	#N/A	#N/A
CALCB	#N/A	Calcb	Calcb				#N/A	#N/A	#N/A
CAMP	#N/A	#N/A	#N/A				#N/A	#N/A	#N/A
CARTPT	#N/A	#N/A	#N/A				#N/A	#N/A	#N/A
CATSPERG	#N/A	#N/A	#N/A				#N/A	#N/A	#N/A
CBLN1	Cbln1	#N/A	#N/A				#N/A	#N/A	#N/A
CBLN2	#N/A	#N/A	#N/A				#N/A	#N/A	#N/A
CBLN3	#N/A	#N/A	#N/A				#N/A	#N/A	#N/A
CBLN4	#N/A	#N/A	#N/A				#N/A	#N/A	#N/A
CCBE1	#N/A	#N/A	#N/A				Ccbe1	#N/A	Ccbe1
CCDC112	#N/A	#N/A	#N/A				#N/A	#N/A	#N/A
CCDC126	#N/A	#N/A	#N/A				#N/A	#N/A	#N/A
CCDC134	#N/A	#N/A	#N/A				#N/A	#N/A	#N/A
CCDC3	#N/A	#N/A	#N/A				#N/A	#N/A	#N/A
CCDC70	#N/A	#N/A	#N/A				#N/A	#N/A	#N/A
CCDC80	#N/A	#N/A	#N/A				#N/A	Ccdc80	#N/A
CCER2	#N/A	#N/A	#N/A				#N/A	#N/A	#N/A
CCK	#N/A	#N/A	Cck				#N/A	#N/A	#N/A
CCL1	#N/A	#N/A	#N/A				#N/A	#N/A	#N/A
CCL11	#N/A	#N/A	#N/A				Ccl11	#N/A	Ccl11
CCL13	#N/A	#N/A	#N/A				#N/A	#N/A	#N/A
CCL14	#N/A	#N/A	#N/A				#N/A	#N/A	#N/A
CCL15	#N/A	#N/A	#N/A				#N/A	#N/A	#N/A
CCL16	#N/A	#N/A	#N/A				#N/A	#N/A	#N/A
CCL17	#N/A	#N/A	Ccl17				#N/A	#N/A	#N/A
CCL18	#N/A	#N/A	#N/A				#N/A	#N/A	#N/A
CCL19	#N/A	#N/A	#N/A				#N/A	#N/A	#N/A
CCL2	Ccl2	Ccl2	Ccl2				#N/A	#N/A	#N/A
CCL20	#N/A	#N/A	#N/A				#N/A	#N/A	#N/A
CCL21	#N/A	#N/A	#N/A				#N/A	#N/A	#N/A
CCL22	#N/A	Ccl22	Ccl22				#N/A	#N/A	#N/A
CCL23	#N/A	#N/A	#N/A				#N/A	#N/A	#N/A
CCL24	#N/A	#N/A	#N/A				Ccl24	#N/A	#N/A
CCL25	#N/A	#N/A	#N/A				#N/A	#N/A	#N/A
CCL26	#N/A	#N/A	#N/A				#N/A	#N/A	#N/A
CCL27	#N/A	#N/A	#N/A				#N/A	#N/A	#N/A
CCL28	Ccl28	Ccl28	Ccl28				#N/A	#N/A	#N/A
CCL3	#N/A	Ccl3	Ccl3				#N/A	#N/A	#N/A
CCL3L1	#N/A	#N/A	#N/A				#N/A	#N/A	#N/A
CCL4	#N/A	Ccl4	Ccl4				#N/A	#N/A	#N/A
CCL4L2	#N/A	#N/A	#N/A				#N/A	#N/A	#N/A
CCL5	#N/A	Ccl5	#N/A				#N/A	#N/A	#N/A
CCL7	#N/A	Ccl7	Ccl7				#N/A	#N/A	#N/A
CCL8	#N/A	Ccl8	Ccl8				#N/A	#N/A	#N/A
CD14	Cd14	Cd14	Cd14				#N/A	#N/A	#N/A
CD163	#N/A	#N/A	#N/A				Cd163	#N/A	Cd163
CD40	#N/A	#N/A	Cd40				#N/A	#N/A	#N/A
CD40LG	#N/A	#N/A	#N/A				#N/A	#N/A	#N/A
CD44	Cd44	Cd44	Cd44				#N/A	#N/A	#N/A
CD55	#N/A	#N/A	#N/A				#N/A	#N/A	#N/A
CD5L	#N/A	#N/A	#N/A				#N/A	#N/A	#N/A
CD6	#N/A	Cd6	#N/A				#N/A	#N/A	#N/A
CDCP2	#N/A	#N/A	#N/A				#N/A	#N/A	#N/A
CDNF	#N/A	#N/A	#N/A				Cdnf	#N/A	Cdnf
CDSN	#N/A	Cdsn	Cdsn				#N/A	#N/A	#N/A
CEACAM16	#N/A	#N/A	#N/A				#N/A	#N/A	#N/A
CEL	#N/A	#N/A	#N/A				#N/A	#N/A	#N/A
CELA1	#N/A	#N/A	#N/A				Cela1	#N/A	#N/A
CELA2A	#N/A	#N/A	#N/A				#N/A	#N/A	#N/A
CELA2B	#N/A	#N/A	#N/A				#N/A	#N/A	#N/A
CELA3A	#N/A	#N/A	#N/A				#N/A	#N/A	#N/A
CELA3B	#N/A	#N/A	#N/A				#N/A	#N/A	#N/A
CEMIP	#N/A	#N/A	#N/A				#N/A	#N/A	#N/A
CER1	#N/A	#N/A	#N/A				#N/A	#N/A	#N/A
CES4A	#N/A	#N/A	#N/A				#N/A	#N/A	#N/A
CES5A	#N/A	#N/A	#N/A				#N/A	#N/A	#N/A
CETP	#N/A	#N/A	#N/A				#N/A	#N/A	#N/A
CFB	Cfb	Cfb	Cfb				#N/A	#N/A	#N/A
CFC1	#N/A	#N/A	#N/A				#N/A	#N/A	#N/A
CFC1B	#N/A	#N/A	#N/A				#N/A	#N/A	#N/A
CFD	#N/A	#N/A	#N/A				#N/A	#N/A	#N/A
CFH	#N/A	#N/A	#N/A				#N/A	#N/A	#N/A
CFHR1	#N/A	#N/A	#N/A				#N/A	#N/A	#N/A
CFHR2	#N/A	#N/A	#N/A				#N/A	#N/A	#N/A
CFHR3	#N/A	#N/A	#N/A				#N/A	#N/A	#N/A
CFHR4	#N/A	#N/A	#N/A				#N/A	#N/A	#N/A
CFHR5	#N/A	#N/A	#N/A				#N/A	#N/A	#N/A
CFI	Cfi	Cfi	Cfi				#N/A	#N/A	#N/A
CFP	#N/A	#N/A	#N/A				#N/A	#N/A	#N/A
CGA	#N/A	#N/A	#N/A				#N/A	#N/A	#N/A
CGB1	#N/A	#N/A	#N/A				#N/A	#N/A	#N/A
CGB2	#N/A	#N/A	#N/A				#N/A	#N/A	#N/A
CGB3	#N/A	#N/A	#N/A				#N/A	#N/A	#N/A
CGB5	#N/A	#N/A	#N/A				#N/A	#N/A	#N/A
CGB7	#N/A	#N/A	#N/A				#N/A	#N/A	#N/A
CGB8	#N/A	#N/A	#N/A				#N/A	#N/A	#N/A
CGREF1	#N/A	#N/A	#N/A				Cgref1	Cgref1	Cgref1
CHAD	#N/A	#N/A	#N/A				#N/A	#N/A	#N/A
CHADL	#N/A	#N/A	#N/A				#N/A	#N/A	#N/A
CHI3L1	#N/A	#N/A	#N/A				#N/A	#N/A	#N/A
CHI3L2	#N/A	#N/A	#N/A				#N/A	#N/A	#N/A
CHIT1	Chit1	Chit1	Chit1				#N/A	#N/A	#N/A
CHRD	#N/A	#N/A	#N/A				#N/A	#N/A	#N/A
CHRDL1	#N/A	#N/A	#N/A				#N/A	#N/A	#N/A
CHRDL2	#N/A	#N/A	#N/A				#N/A	#N/A	#N/A
CHSY1	#N/A	#N/A	Chsy1				#N/A	#N/A	#N/A
CILP	#N/A	#N/A	#N/A				#N/A	#N/A	#N/A
CILP2	#N/A	#N/A	#N/A				Cilp2	Cilp2	Cilp2
CKLF	#N/A	#N/A	#N/A				#N/A	#N/A	#N/A
CLCA1	#N/A	Clca1	Clca1				#N/A	#N/A	#N/A
CLCF1	#N/A	#N/A	#N/A				#N/A	#N/A	#N/A
CLEC11A	#N/A	#N/A	#N/A				#N/A	#N/A	#N/A
CLEC18A	#N/A	#N/A	#N/A				#N/A	#N/A	#N/A
CLEC18B	#N/A	#N/A	#N/A				#N/A	#N/A	#N/A
CLEC18C	#N/A	#N/A	#N/A				#N/A	#N/A	#N/A
CLEC19A	#N/A	#N/A	#N/A				#N/A	#N/A	#N/A
CLEC3A	#N/A	#N/A	#N/A				#N/A	#N/A	#N/A
CLEC3B	#N/A	#N/A	#N/A				Clec3b	#N/A	Clec3b
CLPS	#N/A	#N/A	#N/A				Clps	Clps	Clps
CLPSL1	#N/A	#N/A	#N/A				#N/A	#N/A	#N/A
CLPSL2	#N/A	#N/A	#N/A				#N/A	#N/A	#N/A
CLU	Clu	Clu	Clu				#N/A	#N/A	#N/A
CLUL1	#N/A	#N/A	#N/A				#N/A	#N/A	#N/A
CMA1	#N/A	#N/A	#N/A				Cma1	#N/A	Cma1
CNBD1	#N/A	#N/A	#N/A				#N/A	#N/A	#N/A
CNDP1	#N/A	#N/A	#N/A				#N/A	#N/A	#N/A
CNMD	#N/A	#N/A	#N/A				#N/A	#N/A	#N/A
CNTN2	#N/A	#N/A	#N/A				#N/A	#N/A	#N/A
COCH	#N/A	#N/A	#N/A				Coch	Coch	Coch
COL10A1	#N/A	#N/A	#N/A				#N/A	#N/A	#N/A
COL11A1	#N/A	#N/A	#N/A				#N/A	#N/A	#N/A
COL11A2	Col11a2	Col11a2	Col11a2				#N/A	#N/A	#N/A
COL12A1	#N/A	#N/A	#N/A				#N/A	#N/A	#N/A
COL14A1	#N/A	#N/A	#N/A				#N/A	#N/A	#N/A
COL15A1	#N/A	#N/A	#N/A				#N/A	#N/A	#N/A
COL16A1	#N/A	#N/A	#N/A				#N/A	#N/A	#N/A
COL17A1	#N/A	#N/A	#N/A				#N/A	#N/A	#N/A
COL18A1	#N/A	#N/A	#N/A				#N/A	#N/A	#N/A
COL19A1	#N/A	#N/A	#N/A				#N/A	#N/A	#N/A
COL1A1	#N/A	Col1a1	Col1a1				#N/A	#N/A	#N/A
COL1A2	#N/A	#N/A	#N/A				#N/A	#N/A	#N/A
COL20A1	#N/A	#N/A	#N/A				#N/A	#N/A	#N/A
COL21A1	#N/A	#N/A	#N/A				#N/A	#N/A	#N/A
COL22A1	#N/A	#N/A	#N/A				#N/A	#N/A	#N/A
COL24A1	#N/A	#N/A	#N/A				#N/A	#N/A	#N/A
COL26A1	#N/A	#N/A	#N/A				#N/A	#N/A	#N/A
COL27A1	#N/A	#N/A	#N/A				#N/A	#N/A	#N/A
COL28A1	#N/A	#N/A	#N/A				#N/A	#N/A	#N/A
COL2A1	#N/A	#N/A	#N/A				#N/A	#N/A	#N/A
COL3A1	#N/A	#N/A	#N/A				#N/A	#N/A	#N/A
COL4A1	#N/A	#N/A	#N/A				#N/A	#N/A	#N/A
COL4A2	#N/A	#N/A	#N/A				#N/A	#N/A	#N/A
COL4A3	#N/A	#N/A	#N/A				#N/A	#N/A	#N/A
COL4A4	#N/A	#N/A	#N/A				#N/A	#N/A	#N/A
COL4A5	#N/A	#N/A	#N/A				#N/A	#N/A	#N/A
COL4A6	#N/A	#N/A	#N/A				Col4a6	Col4a6	#N/A
COL5A1	#N/A	#N/A	#N/A				#N/A	#N/A	#N/A
COL5A2	#N/A	#N/A	#N/A				#N/A	#N/A	#N/A
COL5A3	#N/A	#N/A	Col5a3				#N/A	#N/A	#N/A
COL6A1	#N/A	#N/A	#N/A				#N/A	#N/A	#N/A
COL6A2	#N/A	#N/A	#N/A				#N/A	#N/A	#N/A
COL6A3	#N/A	#N/A	#N/A				#N/A	#N/A	#N/A
COL6A5	#N/A	#N/A	#N/A				#N/A	#N/A	#N/A
COL6A6	#N/A	#N/A	#N/A				Col6a6	#N/A	Col6a6
COL7A1	#N/A	#N/A	#N/A				#N/A	#N/A	#N/A
COL8A1	#N/A	#N/A	#N/A				#N/A	#N/A	#N/A
COL8A2	#N/A	#N/A	#N/A				#N/A	#N/A	#N/A
COL9A1	#N/A	#N/A	#N/A				#N/A	#N/A	#N/A
COL9A2	#N/A	#N/A	#N/A				Col9a2	Col9a2	#N/A
COL9A3	#N/A	Col9a3	Col9a3				#N/A	#N/A	#N/A
COLEC10	#N/A	#N/A	#N/A				#N/A	#N/A	#N/A
COLEC11	#N/A	#N/A	#N/A				#N/A	#N/A	#N/A
COLQ	#N/A	#N/A	#N/A				#N/A	#N/A	#N/A
COMP	#N/A	#N/A	#N/A				#N/A	#N/A	#N/A
COPA	#N/A	#N/A	#N/A				#N/A	#N/A	#N/A
CORT	#N/A	#N/A	#N/A				#N/A	#N/A	#N/A
CP	#N/A	#N/A	#N/A				#N/A	#N/A	#N/A
CPA1	#N/A	#N/A	#N/A				#N/A	#N/A	#N/A
CPA2	#N/A	#N/A	Cpa2				#N/A	#N/A	#N/A
CPA3	#N/A	#N/A	#N/A				Cpa3	#N/A	Cpa3
CPA4	#N/A	#N/A	#N/A				#N/A	#N/A	#N/A
CPA5	#N/A	#N/A	#N/A				#N/A	#N/A	#N/A
CPA6	#N/A	#N/A	#N/A				#N/A	#N/A	#N/A
CPAMD8	#N/A	#N/A	#N/A				#N/A	#N/A	#N/A
CPB1	#N/A	#N/A	#N/A				#N/A	#N/A	#N/A
CPB2	#N/A	#N/A	#N/A				#N/A	#N/A	#N/A
CPN1	#N/A	#N/A	#N/A				#N/A	#N/A	#N/A
CPN2	#N/A	#N/A	#N/A				#N/A	#N/A	#N/A
CPQ	#N/A	#N/A	#N/A				#N/A	#N/A	#N/A
CPXM1	#N/A	#N/A	#N/A				#N/A	#N/A	#N/A
CPXM2	#N/A	#N/A	#N/A				Cpxm2	Cpxm2	Cpxm2
CPZ	#N/A	#N/A	#N/A				#N/A	#N/A	#N/A
CREG1	#N/A	#N/A	#N/A				#N/A	Creg1	#N/A
CREG2	#N/A	#N/A	#N/A				Creg2	Creg2	Creg2
CRELD2	#N/A	#N/A	#N/A				Creld2	Creld2	Creld2
CRH	#N/A	#N/A	#N/A				#N/A	#N/A	#N/A
CRHBP	#N/A	#N/A	#N/A				#N/A	#N/A	#N/A
CRHR2	#N/A	#N/A	#N/A				#N/A	#N/A	#N/A
CRISP1	#N/A	#N/A	#N/A				#N/A	#N/A	#N/A
CRISP2	#N/A	#N/A	#N/A				#N/A	#N/A	#N/A
CRISP3	#N/A	#N/A	#N/A				#N/A	#N/A	#N/A
CRISPLD1	#N/A	#N/A	#N/A				#N/A	#N/A	#N/A
CRISPLD2	#N/A	#N/A	#N/A				#N/A	#N/A	#N/A
CRLF1	#N/A	#N/A	#N/A				#N/A	#N/A	#N/A
CRP	#N/A	Crp	Crp				#N/A	#N/A	#N/A
CRTAC1	#N/A	#N/A	#N/A				#N/A	#N/A	#N/A
CRTAP	#N/A	#N/A	#N/A				#N/A	#N/A	#N/A
CSF1	#N/A	#N/A	#N/A				#N/A	#N/A	#N/A
CSF2	#N/A	#N/A	#N/A				#N/A	#N/A	#N/A
CSF2RA	Csf2ra	Csf2ra	Csf2ra				#N/A	#N/A	#N/A
CSF3	#N/A	#N/A	#N/A				#N/A	#N/A	#N/A
CSH1	#N/A	#N/A	#N/A				#N/A	#N/A	#N/A
CSH2	#N/A	#N/A	#N/A				#N/A	#N/A	#N/A
CSHL1	#N/A	#N/A	#N/A				#N/A	#N/A	#N/A
CSN1S1	#N/A	#N/A	#N/A				#N/A	#N/A	#N/A
CSN2	#N/A	#N/A	#N/A				#N/A	#N/A	#N/A
CSN3	#N/A	#N/A	#N/A				#N/A	#N/A	#N/A
CST1	#N/A	#N/A	#N/A				#N/A	#N/A	#N/A
CST11	#N/A	#N/A	#N/A				#N/A	#N/A	#N/A
CST2	#N/A	#N/A	#N/A				#N/A	#N/A	#N/A
CST3	#N/A	#N/A	#N/A				#N/A	#N/A	#N/A
CST4	#N/A	#N/A	#N/A				#N/A	#N/A	#N/A
CST5	#N/A	#N/A	#N/A				#N/A	#N/A	#N/A
CST6	#N/A	#N/A	#N/A				#N/A	#N/A	#N/A
CST7	#N/A	#N/A	#N/A				#N/A	#N/A	#N/A
CST8	#N/A	#N/A	#N/A				#N/A	#N/A	#N/A
CST9	#N/A	#N/A	#N/A				#N/A	#N/A	#N/A
CST9L	#N/A	#N/A	#N/A				#N/A	#N/A	#N/A
CSTL1	#N/A	#N/A	#N/A				#N/A	#N/A	#N/A
CT55	#N/A	#N/A	#N/A				#N/A	#N/A	#N/A
CTF1	#N/A	#N/A	#N/A				#N/A	#N/A	#N/A
CTGF	#N/A	#N/A	#N/A				#N/A	#N/A	#N/A
CTHRC1	#N/A	#N/A	#N/A				#N/A	#N/A	#N/A
CTRB1	#N/A	#N/A	#N/A				#N/A	#N/A	#N/A
CTRB2	#N/A	#N/A	#N/A				#N/A	#N/A	#N/A
CTRC	#N/A	#N/A	#N/A				#N/A	#N/A	#N/A
CTRL	#N/A	#N/A	#N/A				#N/A	#N/A	#N/A
CTSB	#N/A	Ctsb	Ctsb				#N/A	#N/A	#N/A
CTSD	#N/A	#N/A	#N/A				#N/A	#N/A	#N/A
CTSW	#N/A	#N/A	Ctsw				#N/A	#N/A	#N/A
CUTA	#N/A	#N/A	#N/A				#N/A	#N/A	#N/A
CX3CL1	Cx3cl1	#N/A	#N/A				#N/A	#N/A	#N/A
CXCL1	Cxcl1	Cxcl1	Cxcl1				#N/A	#N/A	#N/A
CXCL10	#N/A	Cxcl10	#N/A				#N/A	#N/A	#N/A
CXCL11	Cxcl11	Cxcl11	Cxcl11				#N/A	#N/A	#N/A
CXCL12	#N/A	#N/A	#N/A				#N/A	#N/A	#N/A
CXCL13	#N/A	#N/A	#N/A				#N/A	#N/A	#N/A
CXCL14	#N/A	#N/A	#N/A				#N/A	#N/A	#N/A
CXCL16	Cxcl16	Cxcl16	Cxcl16				#N/A	#N/A	#N/A
CXCL17	Cxcl17	Cxcl17	#N/A				#N/A	#N/A	#N/A
CXCL2	#N/A	#N/A	#N/A				#N/A	#N/A	#N/A
CXCL3	#N/A	#N/A	#N/A				#N/A	#N/A	#N/A
CXCL5	Cxcl5	Cxcl5	Cxcl5				#N/A	#N/A	#N/A
CXCL6	#N/A	#N/A	#N/A				#N/A	#N/A	#N/A
CXCL8	#N/A	#N/A	#N/A				#N/A	#N/A	#N/A
CXCL9	#N/A	#N/A	#N/A				#N/A	#N/A	#N/A
CXorf36	#N/A	#N/A	#N/A				#N/A	#N/A	#N/A
CYB5D2	#N/A	#N/A	#N/A				#N/A	#N/A	#N/A
CYR61	Cyr61	Cyr61	Cyr61				#N/A	#N/A	#N/A
CYTL1	#N/A	#N/A	#N/A				Cytl1	Cytl1	Cytl1
DAND5	#N/A	#N/A	#N/A				#N/A	#N/A	#N/A
DCD	#N/A	#N/A	#N/A				#N/A	#N/A	#N/A
DCN	#N/A	#N/A	#N/A				#N/A	#N/A	#N/A
DEFA4	#N/A	#N/A	#N/A				#N/A	#N/A	#N/A
DEFA5	#N/A	#N/A	#N/A				#N/A	#N/A	#N/A
DEFA6	#N/A	#N/A	#N/A				#N/A	#N/A	#N/A
DEFB1	#N/A	#N/A	#N/A				Defb1	Defb1	Defb1
DEFB103A	#N/A	#N/A	#N/A				#N/A	#N/A	#N/A
DEFB103B	#N/A	#N/A	#N/A				#N/A	#N/A	#N/A
DEFB104A	#N/A	#N/A	#N/A				#N/A	#N/A	#N/A
DEFB104B	#N/A	#N/A	#N/A				#N/A	#N/A	#N/A
DEFB105A	#N/A	#N/A	#N/A				#N/A	#N/A	#N/A
DEFB105B	#N/A	#N/A	#N/A				#N/A	#N/A	#N/A
DEFB106A	#N/A	#N/A	#N/A				#N/A	#N/A	#N/A
DEFB106B	#N/A	#N/A	#N/A				#N/A	#N/A	#N/A
DEFB107A	#N/A	#N/A	#N/A				#N/A	#N/A	#N/A
DEFB107B	#N/A	#N/A	#N/A				#N/A	#N/A	#N/A
DEFB108B	#N/A	#N/A	#N/A				#N/A	#N/A	#N/A
DEFB110	#N/A	#N/A	#N/A				#N/A	#N/A	#N/A
DEFB112	#N/A	#N/A	#N/A				#N/A	#N/A	#N/A
DEFB113	#N/A	#N/A	#N/A				#N/A	#N/A	#N/A
DEFB114	#N/A	#N/A	#N/A				#N/A	#N/A	#N/A
DEFB115	#N/A	#N/A	#N/A				#N/A	#N/A	#N/A
DEFB116	#N/A	#N/A	#N/A				#N/A	#N/A	#N/A
DEFB118	#N/A	#N/A	#N/A				#N/A	#N/A	#N/A
DEFB119	#N/A	#N/A	#N/A				#N/A	#N/A	#N/A
DEFB121	#N/A	#N/A	#N/A				#N/A	#N/A	#N/A
DEFB123	#N/A	#N/A	#N/A				#N/A	#N/A	#N/A
DEFB124	#N/A	#N/A	#N/A				#N/A	#N/A	#N/A
DEFB125	#N/A	#N/A	#N/A				#N/A	#N/A	#N/A
DEFB126	#N/A	#N/A	#N/A				#N/A	#N/A	#N/A
DEFB127	#N/A	#N/A	#N/A				#N/A	#N/A	#N/A
DEFB128	#N/A	#N/A	#N/A				#N/A	#N/A	#N/A
DEFB129	#N/A	#N/A	#N/A				#N/A	#N/A	#N/A
DEFB130A	#N/A	#N/A	#N/A				#N/A	#N/A	#N/A
DEFB130B	#N/A	#N/A	#N/A				#N/A	#N/A	#N/A
DEFB131A	#N/A	#N/A	#N/A				#N/A	#N/A	#N/A
DEFB131B	#N/A	#N/A	#N/A				#N/A	#N/A	#N/A
DEFB132	#N/A	#N/A	#N/A				#N/A	#N/A	#N/A
DEFB133	#N/A	#N/A	#N/A				#N/A	#N/A	#N/A
DEFB134	#N/A	#N/A	#N/A				#N/A	#N/A	#N/A
DEFB135	#N/A	#N/A	#N/A				#N/A	#N/A	#N/A
DEFB136	#N/A	#N/A	#N/A				#N/A	#N/A	#N/A
DEFB4A	#N/A	#N/A	#N/A				#N/A	#N/A	#N/A
DEFB4B	#N/A	#N/A	#N/A				#N/A	#N/A	#N/A
DHH	#N/A	#N/A	#N/A				#N/A	#N/A	#N/A
DHRS13	#N/A	#N/A	#N/A				#N/A	#N/A	#N/A
DHRS4L2	#N/A	#N/A	#N/A				#N/A	#N/A	#N/A
DHRS7C	#N/A	#N/A	#N/A				#N/A	#N/A	#N/A
DHRSX	#N/A	#N/A	#N/A				#N/A	#N/A	#N/A
DKK1	#N/A	#N/A	#N/A				#N/A	#N/A	#N/A
DKK2	#N/A	#N/A	#N/A				#N/A	#N/A	#N/A
DKK3	#N/A	#N/A	#N/A				#N/A	#N/A	#N/A
DKK4	#N/A	#N/A	#N/A				#N/A	#N/A	#N/A
DKKL1	#N/A	#N/A	Dkkl1				#N/A	#N/A	#N/A
DMBT1	Dmbt1	Dmbt1	Dmbt1				#N/A	#N/A	#N/A
DMKN	#N/A	#N/A	#N/A				#N/A	#N/A	#N/A
DMP1	#N/A	#N/A	#N/A				#N/A	#N/A	#N/A
DNASE1	#N/A	#N/A	#N/A				#N/A	#N/A	#N/A
DNASE1L2	Dnase1l2	#N/A	#N/A				#N/A	#N/A	#N/A
DNASE1L3	#N/A	#N/A	#N/A				#N/A	#N/A	#N/A
DPP4	#N/A	#N/A	#N/A				#N/A	#N/A	#N/A
DPT	#N/A	#N/A	#N/A				#N/A	#N/A	#N/A
DRAXIN	#N/A	#N/A	#N/A				#N/A	#N/A	#N/A
DSPP	#N/A	#N/A	#N/A				#N/A	#N/A	#N/A
EBI3	#N/A	#N/A	Ebi3				#N/A	#N/A	#N/A
ECM1	#N/A	#N/A	#N/A				#N/A	#N/A	#N/A
ECM2	#N/A	#N/A	#N/A				Ecm2	#N/A	Ecm2
EDDM3A	#N/A	#N/A	#N/A				#N/A	#N/A	#N/A
EDDM3B	#N/A	#N/A	#N/A				#N/A	#N/A	#N/A
EDIL3	#N/A	#N/A	#N/A				#N/A	#N/A	#N/A
EDN1	Edn1	#N/A	#N/A				#N/A	#N/A	#N/A
EDN2	#N/A	#N/A	#N/A				#N/A	#N/A	#N/A
EDN3	#N/A	#N/A	#N/A				Edn3	#N/A	#N/A
EFEMP1	#N/A	#N/A	#N/A				#N/A	#N/A	#N/A
EFEMP2	#N/A	#N/A	#N/A				#N/A	#N/A	#N/A
EFNA1	#N/A	#N/A	#N/A				#N/A	#N/A	#N/A
EFNA4	#N/A	#N/A	#N/A				#N/A	#N/A	#N/A
EGFL6	#N/A	#N/A	#N/A				#N/A	#N/A	#N/A
EGFL7	#N/A	#N/A	#N/A				#N/A	#N/A	#N/A
EGFL8	#N/A	#N/A	#N/A				#N/A	#N/A	#N/A
EGFLAM	#N/A	#N/A	#N/A				#N/A	#N/A	#N/A
EGFR	#N/A	#N/A	#N/A				#N/A	#N/A	#N/A
ELANE	#N/A	#N/A	#N/A				#N/A	#N/A	#N/A
ELN	#N/A	#N/A	#N/A				#N/A	#N/A	#N/A
ELSPBP1	#N/A	#N/A	#N/A				#N/A	#N/A	#N/A
EMC10	#N/A	#N/A	#N/A				#N/A	#N/A	#N/A
EMID1	#N/A	#N/A	#N/A				#N/A	#N/A	#N/A
EMILIN1	#N/A	#N/A	#N/A				#N/A	#N/A	#N/A
EMILIN2	#N/A	#N/A	#N/A				#N/A	#N/A	#N/A
EMILIN3	#N/A	#N/A	#N/A				#N/A	#N/A	#N/A
ENAM	#N/A	#N/A	#N/A				#N/A	#N/A	#N/A
ENDOD1	#N/A	#N/A	#N/A				#N/A	#N/A	#N/A
ENDOU	#N/A	#N/A	#N/A				Endou	Endou	#N/A
ENHO	#N/A	#N/A	#N/A				#N/A	#N/A	#N/A
ENPP1	#N/A	#N/A	#N/A				#N/A	#N/A	#N/A
ENPP3	#N/A	#N/A	#N/A				#N/A	#N/A	#N/A
ENTPD5	#N/A	#N/A	#N/A				#N/A	#N/A	#N/A
ENTPD6	#N/A	#N/A	#N/A				#N/A	#N/A	#N/A
EPGN	#N/A	#N/A	#N/A				#N/A	#N/A	#N/A
EPO	#N/A	#N/A	#N/A				#N/A	#N/A	#N/A
EPPIN	#N/A	#N/A	#N/A				#N/A	#N/A	#N/A
EPPIN-WFDC6	#N/A	#N/A	#N/A				#N/A	#N/A	#N/A
EPYC	#N/A	#N/A	#N/A				#N/A	#N/A	#N/A
ERAP1	#N/A	#N/A	#N/A				#N/A	#N/A	#N/A
ERAP2	#N/A	#N/A	#N/A				#N/A	#N/A	#N/A
ERBB3	#N/A	#N/A	#N/A				#N/A	#N/A	#N/A
EREG	#N/A	#N/A	#N/A				#N/A	#N/A	#N/A
ERFE	#N/A	#N/A	#N/A				#N/A	#N/A	#N/A
ERVMER34-1	#N/A	#N/A	#N/A				#N/A	#N/A	#N/A
ESM1	#N/A	#N/A	#N/A				#N/A	#N/A	#N/A
EYS	#N/A	#N/A	#N/A				#N/A	#N/A	#N/A
F10	#N/A	#N/A	#N/A				#N/A	#N/A	#N/A
F11	#N/A	#N/A	#N/A				#N/A	#N/A	#N/A
F12	#N/A	#N/A	#N/A				#N/A	#N/A	#N/A
F13A1	#N/A	#N/A	#N/A				#N/A	#N/A	#N/A
F13B	#N/A	#N/A	#N/A				#N/A	#N/A	#N/A
F2	#N/A	#N/A	#N/A				#N/A	#N/A	#N/A
F3	F3	F3	F3				#N/A	#N/A	#N/A
F5	F5	F5	#N/A				#N/A	#N/A	#N/A
F7	#N/A	#N/A	#N/A				#N/A	#N/A	#N/A
F8	#N/A	#N/A	#N/A				#N/A	#N/A	#N/A
F9	#N/A	#N/A	#N/A				#N/A	#N/A	#N/A
FAM131A	#N/A	#N/A	#N/A				#N/A	#N/A	#N/A
FAM172A	#N/A	#N/A	#N/A				#N/A	#N/A	#N/A
FAM177A1	#N/A	#N/A	#N/A				#N/A	#N/A	#N/A
FAM180A	#N/A	#N/A	#N/A				#N/A	#N/A	#N/A
FAM198A	#N/A	#N/A	#N/A				#N/A	#N/A	#N/A
FAM19A1	#N/A	#N/A	#N/A				#N/A	#N/A	#N/A
FAM19A3	Fam19a3	#N/A	#N/A				#N/A	#N/A	#N/A
FAM19A4	#N/A	#N/A	#N/A				#N/A	#N/A	#N/A
FAM19A5	#N/A	#N/A	#N/A				#N/A	#N/A	#N/A
FAM20A	#N/A	#N/A	Fam20a				#N/A	#N/A	#N/A
FAM20C	#N/A	#N/A	#N/A				#N/A	#N/A	#N/A
FAM24A	#N/A	#N/A	#N/A				#N/A	#N/A	#N/A
FAM3A	#N/A	#N/A	#N/A				#N/A	#N/A	#N/A
FAM3B	Fam3b	Fam3b	#N/A				#N/A	#N/A	#N/A
FAM3C	#N/A	#N/A	#N/A				#N/A	#N/A	#N/A
FAM3D	#N/A	#N/A	#N/A				#N/A	#N/A	#N/A
FAM46B	#N/A	#N/A	#N/A				#N/A	#N/A	#N/A
FAP	#N/A	#N/A	#N/A				#N/A	#N/A	#N/A
FAS	#N/A	#N/A	#N/A				#N/A	#N/A	Fas
FASLG	#N/A	#N/A	#N/A				#N/A	#N/A	#N/A
FBLN1	#N/A	#N/A	#N/A				#N/A	#N/A	#N/A
FBLN2	#N/A	#N/A	#N/A				#N/A	#N/A	#N/A
FBLN5	#N/A	#N/A	#N/A				#N/A	#N/A	#N/A
FBLN7	#N/A	#N/A	#N/A				#N/A	#N/A	#N/A
FBN1	#N/A	#N/A	#N/A				#N/A	#N/A	#N/A
FBN2	#N/A	#N/A	#N/A				#N/A	#N/A	#N/A
FBN3	#N/A	#N/A	#N/A				#N/A	#N/A	#N/A
FCER2	#N/A	#N/A	#N/A				#N/A	#N/A	#N/A
FCGR3A	#N/A	#N/A	#N/A				#N/A	#N/A	#N/A
FCGR3B	#N/A	#N/A	#N/A				#N/A	#N/A	#N/A
FCMR	#N/A	#N/A	#N/A				#N/A	#N/A	#N/A
FCN1	#N/A	#N/A	#N/A				#N/A	#N/A	#N/A
FCN2	#N/A	#N/A	#N/A				#N/A	#N/A	#N/A
FCN3	#N/A	#N/A	#N/A				#N/A	#N/A	#N/A
FCRL5	#N/A	#N/A	#N/A				#N/A	#N/A	#N/A
FDCSP	#N/A	#N/A	#N/A				#N/A	#N/A	#N/A
FETUB	#N/A	Fetub	Fetub				#N/A	#N/A	#N/A
FGA	#N/A	#N/A	#N/A				#N/A	#N/A	#N/A
FGB	#N/A	#N/A	#N/A				#N/A	#N/A	#N/A
FGF1	#N/A	#N/A	#N/A				Fgf1	Fgf1	Fgf1
FGF10	#N/A	#N/A	#N/A				Fgf10	#N/A	#N/A
FGF16	#N/A	#N/A	#N/A				#N/A	#N/A	#N/A
FGF17	#N/A	#N/A	#N/A				#N/A	#N/A	#N/A
FGF18	#N/A	#N/A	#N/A				#N/A	#N/A	#N/A
FGF19	#N/A	#N/A	#N/A				#N/A	#N/A	#N/A
FGF2	#N/A	#N/A	#N/A				#N/A	#N/A	#N/A
FGF20	#N/A	#N/A	#N/A				#N/A	#N/A	#N/A
FGF21	#N/A	#N/A	#N/A				#N/A	#N/A	#N/A
FGF22	#N/A	#N/A	#N/A				#N/A	#N/A	#N/A
FGF23	#N/A	#N/A	#N/A				#N/A	#N/A	#N/A
FGF3	#N/A	#N/A	#N/A				#N/A	#N/A	#N/A
FGF4	#N/A	#N/A	#N/A				#N/A	#N/A	#N/A
FGF5	#N/A	#N/A	#N/A				#N/A	#N/A	#N/A
FGF6	#N/A	#N/A	#N/A				#N/A	#N/A	#N/A
FGF7	#N/A	#N/A	#N/A				#N/A	#N/A	#N/A
FGF8	#N/A	#N/A	#N/A				#N/A	#N/A	#N/A
FGF9	#N/A	#N/A	#N/A				#N/A	#N/A	#N/A
FGFBP1	#N/A	#N/A	#N/A				#N/A	#N/A	#N/A
FGFBP2	#N/A	#N/A	#N/A				#N/A	#N/A	#N/A
FGFBP3	#N/A	#N/A	#N/A				#N/A	#N/A	#N/A
FGFR2	#N/A	#N/A	#N/A				#N/A	#N/A	#N/A
FGG	#N/A	#N/A	#N/A				#N/A	#N/A	#N/A
FGL1	#N/A	#N/A	#N/A				Fgl1	Fgl1	Fgl1
FGL2	#N/A	#N/A	#N/A				#N/A	#N/A	#N/A
FLT1	#N/A	#N/A	#N/A				#N/A	#N/A	#N/A
FLT4	#N/A	#N/A	#N/A				#N/A	#N/A	#N/A
FMOD	#N/A	#N/A	#N/A				Fmod	Fmod	Fmod
FN1	#N/A	#N/A	#N/A				#N/A	#N/A	#N/A
FNDC1	#N/A	#N/A	#N/A				#N/A	#N/A	#N/A
FNDC7	#N/A	#N/A	#N/A				#N/A	#N/A	#N/A
FOLR1	Folr1	Folr1	#N/A				#N/A	#N/A	#N/A
FOLR2	#N/A	#N/A	#N/A				Folr2	#N/A	#N/A
FOLR3	#N/A	#N/A	#N/A				#N/A	#N/A	#N/A
FREM1	#N/A	#N/A	#N/A				#N/A	#N/A	#N/A
FREM3	#N/A	#N/A	#N/A				#N/A	#N/A	#N/A
FRZB	#N/A	#N/A	#N/A				#N/A	#N/A	#N/A
FSHB	#N/A	#N/A	#N/A				#N/A	#N/A	#N/A
FST	#N/A	#N/A	#N/A				Fst	#N/A	#N/A
FSTL1	#N/A	#N/A	#N/A				#N/A	#N/A	#N/A
FSTL3	#N/A	#N/A	#N/A				#N/A	#N/A	#N/A
FSTL4	#N/A	#N/A	#N/A				#N/A	#N/A	#N/A
FSTL5	#N/A	#N/A	#N/A				#N/A	#N/A	#N/A
FTCDNL1	#N/A	#N/A	#N/A				#N/A	#N/A	#N/A
FUCA2	#N/A	#N/A	#N/A				#N/A	#N/A	#N/A
GAL	#N/A	#N/A	#N/A				#N/A	#N/A	#N/A
GALP	#N/A	#N/A	#N/A				#N/A	#N/A	#N/A
GAS6	#N/A	#N/A	#N/A				#N/A	#N/A	#N/A
GAST	#N/A	#N/A	#N/A				#N/A	#N/A	#N/A
GATD1	#N/A	#N/A	#N/A				#N/A	#N/A	#N/A
GC	#N/A	#N/A	#N/A				#N/A	#N/A	#N/A
GCG	#N/A	#N/A	#N/A				#N/A	#N/A	#N/A
GDF1	#N/A	#N/A	#N/A				#N/A	#N/A	#N/A
GDF10	#N/A	#N/A	#N/A				#N/A	#N/A	#N/A
GDF11	#N/A	#N/A	#N/A				#N/A	#N/A	#N/A
GDF15	#N/A	#N/A	#N/A				#N/A	#N/A	#N/A
GDF2	#N/A	#N/A	#N/A				#N/A	#N/A	#N/A
GDF3	#N/A	Gdf3	Gdf3				#N/A	#N/A	#N/A
GDF5	#N/A	#N/A	#N/A				#N/A	#N/A	#N/A
GDF6	#N/A	#N/A	#N/A				#N/A	#N/A	#N/A
GDF7	#N/A	#N/A	#N/A				#N/A	#N/A	#N/A
GDF9	#N/A	#N/A	#N/A				#N/A	#N/A	#N/A
GDNF	#N/A	#N/A	#N/A				#N/A	#N/A	#N/A
GFOD1	#N/A	#N/A	#N/A				#N/A	#N/A	#N/A
GFOD2	#N/A	#N/A	#N/A				#N/A	#N/A	#N/A
GH1	#N/A	#N/A	#N/A				#N/A	#N/A	#N/A
GH2	#N/A	#N/A	#N/A				#N/A	#N/A	#N/A
GHR	#N/A	#N/A	#N/A				#N/A	#N/A	#N/A
GHRH	#N/A	#N/A	#N/A				#N/A	#N/A	#N/A
GHRL	#N/A	#N/A	#N/A				#N/A	#N/A	#N/A
GIF	#N/A	#N/A	#N/A				#N/A	#N/A	#N/A
GIP	#N/A	#N/A	#N/A				#N/A	#N/A	#N/A
GKN1	#N/A	#N/A	#N/A				#N/A	#N/A	#N/A
GKN2	#N/A	#N/A	#N/A				#N/A	#N/A	#N/A
GLB1L	#N/A	#N/A	#N/A				#N/A	#N/A	#N/A
GLB1L2	#N/A	#N/A	#N/A				#N/A	Glb1l2	Glb1l2
GLDN	#N/A	#N/A	#N/A				#N/A	#N/A	#N/A
GLIPR1L1	#N/A	#N/A	#N/A				#N/A	#N/A	#N/A
GLT1D1	#N/A	#N/A	#N/A				Glt1d1	Glt1d1	Glt1d1
GLTPD2	#N/A	#N/A	#N/A				#N/A	#N/A	#N/A
GNLY	#N/A	#N/A	#N/A				#N/A	#N/A	#N/A
GNRH1	#N/A	#N/A	#N/A				#N/A	#N/A	#N/A
GNRH2	#N/A	#N/A	#N/A				#N/A	#N/A	#N/A
GPHA2	#N/A	#N/A	#N/A				#N/A	#N/A	#N/A
GPHB5	#N/A	#N/A	#N/A				#N/A	#N/A	#N/A
GPI	#N/A	#N/A	#N/A				#N/A	#N/A	#N/A
GPLD1	#N/A	#N/A	#N/A				#N/A	Gpld1	#N/A
GPX3	#N/A	#N/A	#N/A				#N/A	#N/A	#N/A
GPX5	#N/A	#N/A	#N/A				#N/A	#N/A	#N/A
GPX6	#N/A	#N/A	#N/A				#N/A	#N/A	#N/A
GPX7	#N/A	#N/A	Gpx7				#N/A	#N/A	#N/A
GREM1	#N/A	#N/A	#N/A				#N/A	#N/A	#N/A
GREM2	#N/A	#N/A	#N/A				Grem2	Grem2	#N/A
GRN	#N/A	#N/A	#N/A				#N/A	#N/A	#N/A
GRP	#N/A	#N/A	#N/A				#N/A	#N/A	#N/A
GSN	#N/A	#N/A	#N/A				#N/A	#N/A	Gsn
GUCA2A	#N/A	Guca2a	Guca2a				#N/A	#N/A	#N/A
GUCA2B	#N/A	Guca2b	Guca2b				#N/A	#N/A	#N/A
GZMA	#N/A	#N/A	#N/A				#N/A	#N/A	#N/A
GZMB	#N/A	#N/A	#N/A				#N/A	#N/A	#N/A
GZMH	#N/A	#N/A	#N/A				#N/A	#N/A	#N/A
GZMK	#N/A	#N/A	#N/A				#N/A	#N/A	#N/A
GZMM	#N/A	#N/A	#N/A				#N/A	#N/A	#N/A
HABP2	#N/A	#N/A	#N/A				#N/A	#N/A	Habp2
HAMP	#N/A	#N/A	#N/A				#N/A	#N/A	#N/A
HAPLN1	#N/A	#N/A	#N/A				#N/A	#N/A	#N/A
HAPLN2	#N/A	#N/A	#N/A				#N/A	#N/A	#N/A
HAPLN3	#N/A	#N/A	#N/A				#N/A	#N/A	#N/A
HAPLN4	#N/A	#N/A	#N/A				#N/A	#N/A	#N/A
HBEGF	Hbegf	#N/A	Hbegf				#N/A	#N/A	#N/A
HCRT	#N/A	#N/A	#N/A				#N/A	#N/A	#N/A
HGF	#N/A	Hgf	#N/A				#N/A	#N/A	#N/A
HGFAC	#N/A	#N/A	#N/A				#N/A	#N/A	#N/A
HHIP	#N/A	#N/A	#N/A				Hhip	Hhip	Hhip
HHIPL1	#N/A	#N/A	#N/A				#N/A	#N/A	#N/A
HHIPL2	#N/A	#N/A	#N/A				#N/A	#N/A	#N/A
HHLA1	#N/A	#N/A	#N/A				#N/A	#N/A	#N/A
HLA-G	#N/A	#N/A	#N/A				#N/A	#N/A	#N/A
HMCN1	#N/A	#N/A	#N/A				#N/A	#N/A	#N/A
HMCN2	#N/A	#N/A	#N/A				#N/A	#N/A	#N/A
HMSD	#N/A	#N/A	#N/A				#N/A	#N/A	#N/A
HP	Hp	Hp	#N/A				#N/A	#N/A	#N/A
HPR	#N/A	#N/A	#N/A				#N/A	#N/A	#N/A
HPSE	Hpse	Hpse	Hpse				#N/A	#N/A	#N/A
HPSE2	#N/A	#N/A	#N/A				#N/A	#N/A	#N/A
HPX	#N/A	Hpx	Hpx				#N/A	#N/A	#N/A
HRG	#N/A	#N/A	#N/A				#N/A	#N/A	#N/A
HSD11B1L	#N/A	#N/A	#N/A				#N/A	#N/A	#N/A
HSPG2	#N/A	#N/A	#N/A				#N/A	#N/A	#N/A
HTN1	#N/A	#N/A	#N/A				#N/A	#N/A	#N/A
HTN3	#N/A	#N/A	#N/A				#N/A	#N/A	#N/A
HTRA1	#N/A	#N/A	#N/A				#N/A	#N/A	#N/A
HTRA3	#N/A	#N/A	#N/A				#N/A	#N/A	#N/A
HTRA4	#N/A	#N/A	#N/A				#N/A	#N/A	#N/A
HYAL1	#N/A	#N/A	#N/A				#N/A	#N/A	#N/A
HYAL3	#N/A	#N/A	#N/A				#N/A	#N/A	#N/A
IAPP	#N/A	#N/A	#N/A				Iapp	#N/A	Iapp
IBSP	#N/A	#N/A	#N/A				Ibsp	Ibsp	Ibsp
IFNA1	#N/A	#N/A	#N/A				#N/A	#N/A	#N/A
IFNA10	#N/A	#N/A	#N/A				#N/A	#N/A	#N/A
IFNA13	#N/A	#N/A	#N/A				#N/A	#N/A	#N/A
IFNA14	#N/A	#N/A	#N/A				#N/A	#N/A	#N/A
IFNA16	#N/A	#N/A	#N/A				#N/A	#N/A	#N/A
IFNA17	#N/A	#N/A	#N/A				#N/A	#N/A	#N/A
IFNA2	#N/A	#N/A	#N/A				#N/A	#N/A	#N/A
IFNA21	#N/A	#N/A	#N/A				#N/A	#N/A	#N/A
IFNA4	#N/A	#N/A	#N/A				#N/A	#N/A	#N/A
IFNA5	#N/A	#N/A	#N/A				#N/A	#N/A	#N/A
IFNA6	#N/A	#N/A	#N/A				#N/A	#N/A	#N/A
IFNA7	#N/A	#N/A	#N/A				#N/A	#N/A	#N/A
IFNA8	#N/A	#N/A	#N/A				#N/A	#N/A	#N/A
IFNAR2	#N/A	#N/A	#N/A				#N/A	#N/A	#N/A
IFNB1	#N/A	#N/A	#N/A				#N/A	#N/A	#N/A
IFNE	Ifne	Ifne	Ifne				#N/A	#N/A	#N/A
IFNG	#N/A	#N/A	#N/A				#N/A	#N/A	#N/A
IFNK	#N/A	#N/A	#N/A				#N/A	#N/A	#N/A
IFNL1	#N/A	#N/A	#N/A				#N/A	#N/A	#N/A
IFNL2	#N/A	#N/A	#N/A				#N/A	#N/A	#N/A
IFNL3	#N/A	#N/A	#N/A				#N/A	#N/A	#N/A
IFNW1	#N/A	#N/A	#N/A				#N/A	#N/A	#N/A
IGF1	#N/A	#N/A	#N/A				#N/A	#N/A	#N/A
IGF2	#N/A	#N/A	#N/A				#N/A	#N/A	#N/A
IGFALS	#N/A	#N/A	#N/A				#N/A	#N/A	Igfals
IGFBP1	#N/A	#N/A	#N/A				#N/A	#N/A	#N/A
IGFBP2	#N/A	#N/A	#N/A				Igfbp2	Igfbp2	Igfbp2
IGFBP3	#N/A	#N/A	#N/A				#N/A	#N/A	#N/A
IGFBP4	#N/A	#N/A	#N/A				#N/A	#N/A	#N/A
IGFBP5	#N/A	#N/A	#N/A				#N/A	#N/A	#N/A
IGFBP6	#N/A	#N/A	#N/A				#N/A	#N/A	#N/A
IGFBP7	#N/A	#N/A	Igfbp7				#N/A	#N/A	#N/A
IGFBPL1	#N/A	#N/A	#N/A				#N/A	#N/A	#N/A
IGFL1	#N/A	#N/A	#N/A				#N/A	#N/A	#N/A
IGFL2	#N/A	#N/A	#N/A				#N/A	#N/A	#N/A
IGFL3	#N/A	#N/A	#N/A				#N/A	#N/A	#N/A
IGFL4	#N/A	#N/A	#N/A				#N/A	#N/A	#N/A
IGIP	#N/A	#N/A	#N/A				#N/A	#N/A	#N/A
IGLL1	#N/A	#N/A	#N/A				#N/A	#N/A	#N/A
IGLL5	#N/A	#N/A	#N/A				#N/A	#N/A	#N/A
IGLON5	#N/A	#N/A	#N/A				Iglon5	#N/A	#N/A
IGSF10	#N/A	#N/A	#N/A				#N/A	#N/A	#N/A
IHH	#N/A	#N/A	#N/A				#N/A	#N/A	#N/A
IL10	#N/A	#N/A	#N/A				#N/A	#N/A	#N/A
IL11	#N/A	#N/A	#N/A				#N/A	#N/A	#N/A
IL12A	#N/A	#N/A	#N/A				#N/A	#N/A	#N/A
IL12B	#N/A	#N/A	#N/A				#N/A	#N/A	#N/A
IL13	#N/A	#N/A	#N/A				#N/A	#N/A	#N/A
IL15	#N/A	#N/A	#N/A				#N/A	#N/A	#N/A
IL15RA	#N/A	#N/A	#N/A				#N/A	#N/A	#N/A
IL16	#N/A	#N/A	#N/A				#N/A	#N/A	#N/A
IL17A	#N/A	#N/A	#N/A				#N/A	#N/A	#N/A
IL17B	#N/A	#N/A	#N/A				#N/A	#N/A	#N/A
IL17C	#N/A	#N/A	#N/A				#N/A	#N/A	#N/A
IL17D	#N/A	#N/A	#N/A				Il17d	Il17d	Il17d
IL17F	#N/A	#N/A	#N/A				#N/A	#N/A	#N/A
IL17RA	#N/A	#N/A	#N/A				#N/A	#N/A	#N/A
IL18	#N/A	#N/A	#N/A				#N/A	#N/A	#N/A
IL18BP	Il18bp	Il18bp	#N/A				#N/A	#N/A	#N/A
IL19	#N/A	#N/A	#N/A				#N/A	#N/A	#N/A
IL1A	Il1a	Il1a	Il1a				#N/A	#N/A	#N/A
IL1B	Il1b	Il1b	Il1b				#N/A	#N/A	#N/A
IL1F10	#N/A	#N/A	#N/A				#N/A	#N/A	#N/A
IL1R1	#N/A	#N/A	#N/A				#N/A	#N/A	#N/A
IL1R2	#N/A	#N/A	#N/A				#N/A	#N/A	#N/A
IL1RAP	#N/A	#N/A	#N/A				Il1rap	#N/A	#N/A
IL1RL1	#N/A	#N/A	#N/A				#N/A	#N/A	#N/A
IL1RN	Il1rn	Il1rn	Il1rn				#N/A	#N/A	#N/A
IL2	#N/A	#N/A	#N/A				#N/A	#N/A	#N/A
IL20	#N/A	#N/A	#N/A				#N/A	#N/A	#N/A
IL21	#N/A	#N/A	#N/A				#N/A	#N/A	#N/A
IL22	#N/A	#N/A	#N/A				#N/A	#N/A	#N/A
IL22RA2	#N/A	#N/A	#N/A				#N/A	#N/A	#N/A
IL23A	#N/A	#N/A	#N/A				#N/A	#N/A	#N/A
IL24	#N/A	#N/A	#N/A				#N/A	#N/A	#N/A
IL25	#N/A	#N/A	#N/A				#N/A	#N/A	#N/A
IL26	#N/A	#N/A	#N/A				#N/A	#N/A	#N/A
IL27	#N/A	#N/A	#N/A				#N/A	#N/A	#N/A
IL3	#N/A	#N/A	#N/A				#N/A	#N/A	#N/A
IL31	#N/A	#N/A	#N/A				#N/A	#N/A	#N/A
IL32	#N/A	#N/A	#N/A				#N/A	#N/A	#N/A
IL33	#N/A	Il33	#N/A				#N/A	#N/A	#N/A
IL34	#N/A	#N/A	Il34				#N/A	#N/A	#N/A
IL36A	#N/A	#N/A	#N/A				#N/A	#N/A	#N/A
IL36B	#N/A	#N/A	#N/A				#N/A	#N/A	#N/A
IL36G	#N/A	#N/A	#N/A				#N/A	#N/A	#N/A
IL36RN	#N/A	#N/A	#N/A				#N/A	#N/A	#N/A
IL37	#N/A	#N/A	#N/A				#N/A	#N/A	#N/A
IL4	#N/A	#N/A	#N/A				#N/A	#N/A	#N/A
IL4I1	#N/A	#N/A	#N/A				#N/A	#N/A	#N/A
IL4R	#N/A	#N/A	#N/A				#N/A	#N/A	#N/A
IL5	#N/A	#N/A	#N/A				#N/A	#N/A	#N/A
IL6	#N/A	#N/A	#N/A				#N/A	#N/A	#N/A
IL6ST	#N/A	#N/A	#N/A				#N/A	#N/A	#N/A
IL7	#N/A	#N/A	#N/A				#N/A	#N/A	#N/A
IL9	#N/A	#N/A	#N/A				#N/A	#N/A	#N/A
IMPG1	#N/A	#N/A	#N/A				#N/A	#N/A	#N/A
INHA	#N/A	#N/A	#N/A				#N/A	#N/A	#N/A
INHBA	#N/A	#N/A	#N/A				#N/A	#N/A	#N/A
INHBB	#N/A	Inhbb	#N/A				#N/A	#N/A	#N/A
INHBC	#N/A	#N/A	#N/A				#N/A	#N/A	#N/A
INHBE	#N/A	#N/A	#N/A				#N/A	#N/A	#N/A
INS	#N/A	#N/A	#N/A				#N/A	#N/A	#N/A
INS-IGF2	#N/A	#N/A	#N/A				#N/A	#N/A	#N/A
INSL3	#N/A	#N/A	#N/A				#N/A	#N/A	#N/A
INSL4	#N/A	#N/A	#N/A				#N/A	#N/A	#N/A
INSL5	#N/A	#N/A	#N/A				#N/A	#N/A	#N/A
INSL6	#N/A	#N/A	#N/A				#N/A	#N/A	#N/A
ISG15	Isg15	Isg15	Isg15				#N/A	#N/A	#N/A
ISLR	#N/A	#N/A	#N/A				#N/A	#N/A	#N/A
ISM1	#N/A	#N/A	#N/A				Ism1	Ism1	Ism1
ISM2	#N/A	#N/A	#N/A				Ism2	Ism2	Ism2
ITGBL1	#N/A	#N/A	#N/A				#N/A	#N/A	#N/A
ITIH1	#N/A	#N/A	#N/A				#N/A	#N/A	#N/A
ITIH2	#N/A	#N/A	#N/A				#N/A	#N/A	#N/A
ITIH3	#N/A	#N/A	#N/A				#N/A	#N/A	#N/A
ITIH4	#N/A	#N/A	#N/A				#N/A	#N/A	#N/A
ITIH5	#N/A	#N/A	#N/A				Itih5	Itih5	Itih5
ITIH6	#N/A	#N/A	#N/A				#N/A	#N/A	#N/A
ITLN1	#N/A	#N/A	#N/A				Itln1	Itln1	Itln1
ITLN2	#N/A	#N/A	#N/A				#N/A	#N/A	#N/A
IZUMO4	#N/A	#N/A	#N/A				#N/A	#N/A	#N/A
JAM3	#N/A	#N/A	#N/A				#N/A	#N/A	#N/A
JCHAIN	#N/A	#N/A	#N/A				#N/A	#N/A	#N/A
KAZALD1	#N/A	#N/A	#N/A				#N/A	#N/A	#N/A
KCP	#N/A	#N/A	#N/A				#N/A	#N/A	#N/A
KERA	#N/A	#N/A	#N/A				#N/A	#N/A	#N/A
KIAA0100	#N/A	#N/A	#N/A				#N/A	#N/A	#N/A
KIAA0319	#N/A	#N/A	#N/A				#N/A	#N/A	#N/A
KIR3DX1	#N/A	#N/A	#N/A				#N/A	#N/A	#N/A
KISS1	#N/A	#N/A	#N/A				#N/A	#N/A	#N/A
KL	#N/A	#N/A	#N/A				#N/A	#N/A	#N/A
KLK1	#N/A	#N/A	#N/A				#N/A	#N/A	#N/A
KLK10	#N/A	#N/A	#N/A				#N/A	#N/A	#N/A
KLK11	#N/A	#N/A	#N/A				#N/A	#N/A	#N/A
KLK12	#N/A	#N/A	#N/A				#N/A	#N/A	#N/A
KLK13	#N/A	#N/A	#N/A				#N/A	#N/A	#N/A
KLK14	#N/A	#N/A	#N/A				#N/A	#N/A	#N/A
KLK15	#N/A	#N/A	#N/A				#N/A	#N/A	#N/A
KLK2	#N/A	#N/A	#N/A				#N/A	#N/A	#N/A
KLK3	#N/A	#N/A	#N/A				#N/A	#N/A	#N/A
KLK4	#N/A	#N/A	#N/A				#N/A	#N/A	#N/A
KLK5	#N/A	#N/A	#N/A				#N/A	#N/A	#N/A
KLK6	#N/A	#N/A	#N/A				#N/A	#N/A	#N/A
KLK7	#N/A	#N/A	#N/A				#N/A	#N/A	#N/A
KLK8	#N/A	#N/A	#N/A				#N/A	#N/A	#N/A
KLK9	#N/A	#N/A	#N/A				#N/A	#N/A	#N/A
KLKB1	#N/A	#N/A	#N/A				#N/A	#N/A	#N/A
KNG1	#N/A	#N/A	#N/A				#N/A	#N/A	#N/A
KRTDAP	#N/A	#N/A	#N/A				#N/A	#N/A	#N/A
LACRT	#N/A	#N/A	#N/A				#N/A	#N/A	#N/A
LAD1	Lad1	Lad1	Lad1				#N/A	#N/A	#N/A
LAG3	#N/A	Lag3	Lag3				#N/A	#N/A	#N/A
LAIR2	#N/A	#N/A	#N/A				#N/A	#N/A	#N/A
LALBA	#N/A	#N/A	#N/A				#N/A	#N/A	#N/A
LAMA1	#N/A	#N/A	#N/A				#N/A	#N/A	#N/A
LAMA2	#N/A	#N/A	#N/A				Lama2	#N/A	#N/A
LAMA3	#N/A	#N/A	Lama3				#N/A	#N/A	#N/A
LAMA4	#N/A	#N/A	#N/A				#N/A	#N/A	#N/A
LAMA5	Lama5	#N/A	#N/A				#N/A	#N/A	#N/A
LAMB1	#N/A	#N/A	#N/A				#N/A	#N/A	#N/A
LAMB2	#N/A	#N/A	#N/A				#N/A	#N/A	#N/A
LAMB3	#N/A	#N/A	Lamb3				#N/A	#N/A	#N/A
LAMB4	#N/A	#N/A	#N/A				#N/A	#N/A	#N/A
LAMC1	#N/A	#N/A	#N/A				#N/A	#N/A	#N/A
LAMC2	#N/A	#N/A	#N/A				#N/A	#N/A	#N/A
LAMC3	#N/A	#N/A	#N/A				Lamc3	Lamc3	Lamc3
LBP	#N/A	Lbp	#N/A				#N/A	#N/A	#N/A
LCAT	#N/A	#N/A	#N/A				#N/A	#N/A	#N/A
LCN1	#N/A	#N/A	#N/A				#N/A	#N/A	#N/A
LCN10	#N/A	#N/A	#N/A				#N/A	#N/A	#N/A
LCN12	#N/A	#N/A	#N/A				#N/A	#N/A	#N/A
LCN15	#N/A	#N/A	#N/A				#N/A	#N/A	#N/A
LCN2	Lcn2	Lcn2	#N/A				#N/A	#N/A	#N/A
LCN6	#N/A	#N/A	#N/A				#N/A	#N/A	#N/A
LCN8	#N/A	#N/A	#N/A				#N/A	#N/A	#N/A
LCN9	#N/A	#N/A	#N/A				#N/A	#N/A	#N/A
LDLRAD2	#N/A	#N/A	#N/A				#N/A	#N/A	#N/A
LEAP2	#N/A	#N/A	#N/A				#N/A	#N/A	#N/A
LECT2	#N/A	#N/A	#N/A				#N/A	#N/A	#N/A
LEFTY1	#N/A	Lefty1	Lefty1				#N/A	#N/A	#N/A
LEFTY2	#N/A	#N/A	#N/A				#N/A	#N/A	#N/A
LEP	#N/A	#N/A	#N/A				#N/A	#N/A	#N/A
LEPR	#N/A	#N/A	#N/A				Lepr	#N/A	#N/A
LGALS1	#N/A	#N/A	#N/A				#N/A	#N/A	#N/A
LGALS3	Lgals3	Lgals3	Lgals3				#N/A	#N/A	#N/A
LGALS3BP	Lgals3bp	Lgals3bp	Lgals3bp				#N/A	#N/A	#N/A
LGALS9	Lgals9	Lgals9	Lgals9				#N/A	#N/A	#N/A
LGI1	#N/A	#N/A	#N/A				Lgi1	Lgi1	Lgi1
LGI2	#N/A	#N/A	#N/A				#N/A	#N/A	#N/A
LGI3	#N/A	#N/A	#N/A				Lgi3	Lgi3	Lgi3
LGI4	#N/A	#N/A	#N/A				#N/A	#N/A	#N/A
LHB	#N/A	#N/A	#N/A				#N/A	#N/A	#N/A
LIF	Lif	Lif	Lif				#N/A	#N/A	#N/A
LILRA2	#N/A	#N/A	#N/A				#N/A	#N/A	#N/A
LILRA5	#N/A	#N/A	#N/A				#N/A	#N/A	#N/A
LIPC	#N/A	#N/A	#N/A				#N/A	#N/A	#N/A
LIPF	#N/A	#N/A	#N/A				#N/A	#N/A	#N/A
LIPG	#N/A	#N/A	#N/A				#N/A	#N/A	#N/A
LIPH	#N/A	#N/A	#N/A				#N/A	#N/A	#N/A
LIPI	#N/A	#N/A	#N/A				#N/A	#N/A	#N/A
LIPK	#N/A	#N/A	#N/A				#N/A	#N/A	#N/A
LIPM	#N/A	#N/A	#N/A				#N/A	#N/A	#N/A
LIPN	#N/A	#N/A	#N/A				#N/A	#N/A	#N/A
LOX	#N/A	#N/A	#N/A				#N/A	#N/A	#N/A
LOXL1	#N/A	#N/A	#N/A				#N/A	#N/A	#N/A
LOXL2	#N/A	#N/A	#N/A				#N/A	#N/A	#N/A
LOXL3	#N/A	#N/A	#N/A				#N/A	#N/A	#N/A
LOXL4	#N/A	#N/A	#N/A				#N/A	#N/A	#N/A
LPA	#N/A	#N/A	#N/A				#N/A	#N/A	#N/A
LPL	#N/A	#N/A	#N/A				#N/A	#N/A	#N/A
LPO	#N/A	#N/A	Lpo				#N/A	#N/A	#N/A
LRCH3	#N/A	#N/A	#N/A				#N/A	#N/A	#N/A
LRCOL1	Lrcol1	#N/A	#N/A				#N/A	#N/A	#N/A
LRG1	Lrg1	Lrg1	#N/A				#N/A	#N/A	#N/A
LRP8	#N/A	Lrp8	Lrp8				#N/A	#N/A	#N/A
LRRC17	#N/A	#N/A	#N/A				#N/A	#N/A	#N/A
LTA	#N/A	#N/A	#N/A				#N/A	#N/A	#N/A
LTBP1	#N/A	#N/A	#N/A				#N/A	#N/A	#N/A
LTBP2	Ltbp2	Ltbp2	Ltbp2				#N/A	#N/A	#N/A
LTBP3	#N/A	#N/A	#N/A				#N/A	#N/A	#N/A
LTBP4	#N/A	#N/A	#N/A				Ltbp4	#N/A	#N/A
LTF	Ltf	Ltf	Ltf				#N/A	#N/A	#N/A
LUM	#N/A	#N/A	#N/A				#N/A	#N/A	#N/A
LUZP2	#N/A	#N/A	#N/A				#N/A	#N/A	#N/A
LY6G5B	#N/A	#N/A	#N/A				#N/A	#N/A	#N/A
LY6G5C	#N/A	#N/A	#N/A				#N/A	#N/A	#N/A
LY6K	Ly6k	Ly6k	#N/A				#N/A	#N/A	#N/A
LY86	#N/A	Ly86	Ly86				#N/A	#N/A	#N/A
LY96	#N/A	#N/A	#N/A				#N/A	#N/A	#N/A
LYG1	#N/A	#N/A	#N/A				#N/A	#N/A	#N/A
LYG2	#N/A	#N/A	#N/A				#N/A	#N/A	#N/A
LYPD6	#N/A	#N/A	#N/A				Lypd6	Lypd6	#N/A
LYPD8	#N/A	Lypd8	Lypd8				#N/A	#N/A	#N/A
LYZ	#N/A	#N/A	#N/A				#N/A	#N/A	#N/A
LYZL1	#N/A	#N/A	#N/A				#N/A	#N/A	#N/A
LYZL2	#N/A	#N/A	#N/A				#N/A	#N/A	#N/A
LYZL4	#N/A	#N/A	#N/A				#N/A	#N/A	#N/A
LYZL6	#N/A	#N/A	#N/A				#N/A	#N/A	#N/A
MAMDC2	#N/A	#N/A	#N/A				#N/A	#N/A	#N/A
MAN2B2	#N/A	#N/A	#N/A				#N/A	#N/A	#N/A
MANF	#N/A	#N/A	#N/A				#N/A	Manf	Manf
MASP1	#N/A	#N/A	#N/A				#N/A	#N/A	#N/A
MASP2	#N/A	#N/A	#N/A				#N/A	#N/A	#N/A
MATN1	#N/A	#N/A	#N/A				#N/A	#N/A	#N/A
MATN2	#N/A	#N/A	#N/A				#N/A	#N/A	#N/A
MATN3	#N/A	#N/A	#N/A				#N/A	#N/A	#N/A
MATN4	#N/A	#N/A	#N/A				#N/A	#N/A	#N/A
MBL2	#N/A	#N/A	#N/A				#N/A	#N/A	#N/A
MDK	#N/A	Mdk	Mdk				#N/A	#N/A	#N/A
MEGF6	#N/A	#N/A	#N/A				#N/A	#N/A	#N/A
MEI1	#N/A	#N/A	#N/A				#N/A	#N/A	#N/A
MEP1B	#N/A	#N/A	#N/A				#N/A	#N/A	#N/A
MEPE	#N/A	#N/A	#N/A				#N/A	#N/A	#N/A
MET	#N/A	#N/A	#N/A				#N/A	#N/A	#N/A
METRN	#N/A	#N/A	#N/A				#N/A	#N/A	#N/A
METRNL	#N/A	Metrnl	Metrnl				#N/A	#N/A	#N/A
METTL24	#N/A	#N/A	#N/A				#N/A	#N/A	#N/A
METTL9	#N/A	#N/A	#N/A				#N/A	#N/A	#N/A
MFAP2	#N/A	#N/A	Mfap2				#N/A	#N/A	#N/A
MFAP4	#N/A	#N/A	#N/A				#N/A	#N/A	#N/A
MFAP5	#N/A	#N/A	#N/A				#N/A	#N/A	#N/A
MFGE8	#N/A	#N/A	Mfge8				#N/A	#N/A	#N/A
MGAT4A	Mgat4a	Mgat4a	Mgat4a				#N/A	#N/A	#N/A
MGP	#N/A	#N/A	#N/A				#N/A	#N/A	#N/A
MIA	#N/A	#N/A	#N/A				#N/A	#N/A	#N/A
MIF	#N/A	#N/A	#N/A				#N/A	#N/A	#N/A
MLN	#N/A	#N/A	#N/A				#N/A	#N/A	#N/A
MMP1	#N/A	#N/A	#N/A				#N/A	#N/A	#N/A
MMP10	#N/A	#N/A	#N/A				#N/A	#N/A	#N/A
MMP11	#N/A	Mmp11	Mmp11				#N/A	#N/A	#N/A
MMP12	#N/A	#N/A	#N/A				#N/A	#N/A	#N/A
MMP13	#N/A	#N/A	#N/A				#N/A	#N/A	#N/A
MMP16	#N/A	#N/A	#N/A				#N/A	#N/A	#N/A
MMP17	#N/A	#N/A	#N/A				Mmp17	Mmp17	#N/A
MMP19	#N/A	#N/A	#N/A				#N/A	#N/A	#N/A
MMP2	#N/A	#N/A	#N/A				#N/A	#N/A	#N/A
MMP20	#N/A	#N/A	#N/A				#N/A	#N/A	#N/A
MMP21	#N/A	#N/A	#N/A				#N/A	#N/A	#N/A
MMP24	#N/A	#N/A	#N/A				#N/A	#N/A	#N/A
MMP25	#N/A	#N/A	#N/A				#N/A	#N/A	#N/A
MMP26	#N/A	#N/A	#N/A				#N/A	#N/A	#N/A
MMP28	#N/A	#N/A	#N/A				#N/A	#N/A	#N/A
MMP3	Mmp3	Mmp3	Mmp3				#N/A	#N/A	#N/A
MMP7	#N/A	#N/A	#N/A				#N/A	#N/A	#N/A
MMP8	#N/A	#N/A	#N/A				#N/A	#N/A	#N/A
MMP9	#N/A	#N/A	#N/A				#N/A	#N/A	#N/A
MMRN1	#N/A	#N/A	#N/A				Mmrn1	Mmrn1	Mmrn1
MMRN2	#N/A	#N/A	#N/A				#N/A	#N/A	#N/A
MSMB	#N/A	#N/A	#N/A				Msmb	Msmb	Msmb
MSMP	#N/A	#N/A	#N/A				#N/A	#N/A	#N/A
MST1	#N/A	#N/A	#N/A				#N/A	#N/A	#N/A
MSTN	#N/A	#N/A	#N/A				#N/A	#N/A	#N/A
MTRNR2L1	#N/A	#N/A	#N/A				#N/A	#N/A	#N/A
MTRNR2L10	#N/A	#N/A	#N/A				#N/A	#N/A	#N/A
MTRNR2L11	#N/A	#N/A	#N/A				#N/A	#N/A	#N/A
MTRNR2L12	#N/A	#N/A	#N/A				#N/A	#N/A	#N/A
MTRNR2L13	#N/A	#N/A	#N/A				#N/A	#N/A	#N/A
MTRNR2L3	#N/A	#N/A	#N/A				#N/A	#N/A	#N/A
MTRNR2L4	#N/A	#N/A	#N/A				#N/A	#N/A	#N/A
MTRNR2L5	#N/A	#N/A	#N/A				#N/A	#N/A	#N/A
MTRNR2L6	#N/A	#N/A	#N/A				#N/A	#N/A	#N/A
MTRNR2L7	#N/A	#N/A	#N/A				#N/A	#N/A	#N/A
MTRNR2L8	#N/A	#N/A	#N/A				#N/A	#N/A	#N/A
MUC1	Muc1	Muc1	Muc1				#N/A	#N/A	#N/A
MUC13	Muc13	Muc13	Muc13				#N/A	#N/A	#N/A
MUC16	#N/A	#N/A	#N/A				#N/A	#N/A	#N/A
MUC20	Muc20	#N/A	#N/A				#N/A	#N/A	#N/A
MUC4	#N/A	Muc4	Muc4				#N/A	#N/A	#N/A
MUC5AC	#N/A	#N/A	#N/A				#N/A	#N/A	#N/A
MUC5B	#N/A	#N/A	#N/A				#N/A	#N/A	#N/A
MUC6	#N/A	#N/A	#N/A				#N/A	#N/A	#N/A
MUC7	#N/A	#N/A	#N/A				#N/A	#N/A	#N/A
MUCL1	#N/A	#N/A	#N/A				#N/A	#N/A	#N/A
MXRA5	#N/A	#N/A	#N/A				#N/A	#N/A	#N/A
MXRA7	#N/A	#N/A	#N/A				#N/A	#N/A	#N/A
MYDGF	#N/A	#N/A	#N/A				#N/A	#N/A	#N/A
MYOC	#N/A	#N/A	#N/A				Myoc	Myoc	Myoc
MZB1	#N/A	#N/A	#N/A				#N/A	#N/A	#N/A
NAMPT	#N/A	#N/A	#N/A				#N/A	#N/A	#N/A
NAPSA	#N/A	#N/A	Napsa				#N/A	#N/A	#N/A
NAXE	#N/A	#N/A	#N/A				#N/A	#N/A	#N/A
NBL1	#N/A	#N/A	#N/A				#N/A	#N/A	#N/A
NCAN	#N/A	#N/A	#N/A				#N/A	#N/A	#N/A
NDNF	#N/A	Ndnf	Ndnf				#N/A	#N/A	#N/A
NDP	#N/A	#N/A	#N/A				#N/A	#N/A	#N/A
NECTIN1	#N/A	#N/A	#N/A				#N/A	#N/A	#N/A
NECTIN4	#N/A	#N/A	#N/A				#N/A	#N/A	#N/A
NELL1	#N/A	#N/A	#N/A				#N/A	#N/A	#N/A
NELL2	#N/A	#N/A	#N/A				#N/A	Nell2	#N/A
NENF	#N/A	#N/A	#N/A				#N/A	#N/A	#N/A
NGF	#N/A	#N/A	#N/A				#N/A	#N/A	#N/A
NHLRC3	#N/A	#N/A	#N/A				#N/A	#N/A	#N/A
NID1	#N/A	#N/A	#N/A				#N/A	#N/A	#N/A
NID2	#N/A	#N/A	#N/A				#N/A	#N/A	#N/A
NMB	#N/A	#N/A	Nmb				#N/A	#N/A	#N/A
NMS	#N/A	#N/A	#N/A				#N/A	#N/A	#N/A
NMU	#N/A	#N/A	#N/A				#N/A	#N/A	#N/A
NODAL	#N/A	#N/A	#N/A				#N/A	#N/A	#N/A
NOG	#N/A	#N/A	#N/A				#N/A	#N/A	#N/A
NOTCH2NL	#N/A	#N/A	#N/A				#N/A	#N/A	#N/A
NOTUM	#N/A	#N/A	#N/A				#N/A	#N/A	#N/A
NOV	#N/A	#N/A	#N/A				#N/A	#N/A	#N/A
NPB	#N/A	#N/A	#N/A				#N/A	#N/A	#N/A
NPC2	#N/A	#N/A	#N/A				#N/A	#N/A	#N/A
NPFF	#N/A	#N/A	#N/A				#N/A	#N/A	#N/A
NPNT	Npnt	Npnt	Npnt				#N/A	#N/A	#N/A
NPPA	#N/A	#N/A	#N/A				#N/A	#N/A	#N/A
NPPB	#N/A	#N/A	#N/A				#N/A	#N/A	#N/A
NPPC	#N/A	#N/A	#N/A				#N/A	#N/A	#N/A
NPS	#N/A	#N/A	#N/A				#N/A	#N/A	#N/A
NPTX1	#N/A	#N/A	#N/A				#N/A	#N/A	#N/A
NPTX2	#N/A	#N/A	#N/A				Nptx2	Nptx2	Nptx2
NPVF	#N/A	#N/A	#N/A				#N/A	#N/A	#N/A
NPW	#N/A	#N/A	#N/A				#N/A	#N/A	#N/A
NPY	#N/A	#N/A	#N/A				#N/A	#N/A	#N/A
NRG1	#N/A	#N/A	#N/A				#N/A	#N/A	#N/A
NRG2	#N/A	#N/A	#N/A				Nrg2	Nrg2	Nrg2
NRG3	#N/A	#N/A	#N/A				#N/A	#N/A	#N/A
NRG4	#N/A	#N/A	#N/A				#N/A	#N/A	#N/A
NRN1L	#N/A	#N/A	#N/A				#N/A	#N/A	#N/A
NRP1	#N/A	#N/A	#N/A				#N/A	#N/A	#N/A
NRP2	#N/A	#N/A	#N/A				#N/A	#N/A	#N/A
NRTN	#N/A	#N/A	#N/A				#N/A	Nrtn	Nrtn
NT5DC3	#N/A	#N/A	#N/A				#N/A	#N/A	#N/A
NTF3	#N/A	#N/A	#N/A				#N/A	#N/A	#N/A
NTF4	#N/A	#N/A	#N/A				#N/A	#N/A	#N/A
NTN1	#N/A	#N/A	#N/A				Ntn1	Ntn1	Ntn1
NTN3	#N/A	#N/A	#N/A				#N/A	#N/A	#N/A
NTN4	#N/A	#N/A	#N/A				#N/A	#N/A	#N/A
NTN5	#N/A	#N/A	#N/A				#N/A	#N/A	#N/A
NTS	#N/A	#N/A	#N/A				#N/A	#N/A	#N/A
NUCB1	#N/A	#N/A	#N/A				#N/A	#N/A	#N/A
NUCB2	#N/A	#N/A	#N/A				#N/A	Nucb2	Nucb2
NXPE3	#N/A	#N/A	#N/A				Nxpe3	Nxpe3	Nxpe3
NXPE4	#N/A	#N/A	#N/A				#N/A	#N/A	#N/A
NXPH1	#N/A	#N/A	#N/A				#N/A	#N/A	#N/A
NXPH2	#N/A	#N/A	#N/A				#N/A	#N/A	#N/A
NXPH3	#N/A	#N/A	#N/A				Nxph3	#N/A	#N/A
NXPH4	#N/A	#N/A	#N/A				#N/A	#N/A	#N/A
OAF	#N/A	Oaf	Oaf				#N/A	#N/A	#N/A
OBP2A	#N/A	#N/A	#N/A				#N/A	#N/A	#N/A
OBP2B	#N/A	#N/A	#N/A				#N/A	#N/A	#N/A
OC90	#N/A	#N/A	#N/A				#N/A	#N/A	#N/A
ODAPH	#N/A	#N/A	#N/A				#N/A	#N/A	#N/A
OGN	#N/A	#N/A	#N/A				Ogn	Ogn	Ogn
OIT3	#N/A	#N/A	Oit3				#N/A	#N/A	#N/A
OLFM1	#N/A	#N/A	#N/A				Olfm1	#N/A	#N/A
OLFM2	#N/A	#N/A	#N/A				#N/A	#N/A	#N/A
OLFM3	#N/A	#N/A	#N/A				#N/A	#N/A	#N/A
OLFM4	Olfm4	Olfm4	Olfm4				#N/A	#N/A	#N/A
OLFML1	#N/A	#N/A	#N/A				Olfml1	#N/A	Olfml1
OLFML2A	#N/A	#N/A	#N/A				Olfml2a	#N/A	Olfml2a
OLFML2B	#N/A	#N/A	#N/A				#N/A	#N/A	#N/A
OLFML3	#N/A	#N/A	#N/A				#N/A	#N/A	#N/A
OMD	#N/A	#N/A	#N/A				#N/A	#N/A	#N/A
OOSP2	#N/A	#N/A	#N/A				#N/A	#N/A	#N/A
OPRPN	#N/A	#N/A	#N/A				#N/A	#N/A	#N/A
OPTC	#N/A	#N/A	#N/A				Optc	Optc	Optc
ORM1	#N/A	#N/A	#N/A				#N/A	#N/A	#N/A
ORM2	#N/A	#N/A	#N/A				#N/A	#N/A	#N/A
OSM	#N/A	#N/A	Osm				#N/A	#N/A	#N/A
OSTN	#N/A	#N/A	#N/A				#N/A	#N/A	#N/A
OTOA	#N/A	#N/A	#N/A				#N/A	#N/A	#N/A
OTOG	#N/A	#N/A	#N/A				#N/A	#N/A	#N/A
OTOL1	#N/A	#N/A	#N/A				#N/A	#N/A	#N/A
OTOR	#N/A	#N/A	#N/A				#N/A	#N/A	#N/A
OTOS	#N/A	#N/A	#N/A				#N/A	#N/A	#N/A
OVCH1	#N/A	#N/A	#N/A				#N/A	#N/A	#N/A
OVCH2	#N/A	#N/A	#N/A				#N/A	#N/A	#N/A
OXT	#N/A	#N/A	#N/A				#N/A	#N/A	#N/A
P4HB	#N/A	#N/A	#N/A				#N/A	#N/A	#N/A
PAEP	#N/A	#N/A	#N/A				#N/A	#N/A	#N/A
PAM	#N/A	#N/A	#N/A				#N/A	#N/A	#N/A
PAMR1	Pamr1	#N/A	#N/A				#N/A	#N/A	#N/A
PAPLN	#N/A	#N/A	#N/A				Papln	Papln	Papln
PAPPA	#N/A	#N/A	#N/A				Pappa	Pappa	Pappa
PAPPA2	#N/A	#N/A	#N/A				Pappa2	Pappa2	Pappa2
PATE1	#N/A	#N/A	#N/A				#N/A	#N/A	#N/A
PATE2	#N/A	#N/A	#N/A				#N/A	#N/A	#N/A
PATE3	#N/A	#N/A	#N/A				#N/A	#N/A	#N/A
PATE4	#N/A	#N/A	#N/A				#N/A	#N/A	#N/A
PCDH12	#N/A	#N/A	#N/A				#N/A	#N/A	#N/A
PCDHA1	#N/A	#N/A	#N/A				#N/A	#N/A	#N/A
PCDHA10	#N/A	#N/A	#N/A				#N/A	#N/A	#N/A
PCOLCE	#N/A	#N/A	#N/A				#N/A	#N/A	#N/A
PCOLCE2	#N/A	#N/A	#N/A				Pcolce2	Pcolce2	Pcolce2
PCSK1	Pcsk1	Pcsk1	#N/A				#N/A	#N/A	#N/A
PCSK1N	#N/A	#N/A	#N/A				#N/A	#N/A	#N/A
PCSK2	#N/A	#N/A	#N/A				#N/A	#N/A	#N/A
PCSK5	#N/A	#N/A	#N/A				#N/A	#N/A	#N/A
PCSK6	#N/A	#N/A	#N/A				#N/A	#N/A	Pcsk6
PCSK9	Pcsk9	Pcsk9	Pcsk9				#N/A	#N/A	#N/A
PCYOX1L	Pcyox1l	Pcyox1l	Pcyox1l				#N/A	#N/A	#N/A
PDCD1LG2	#N/A	#N/A	Pdcd1lg2				#N/A	#N/A	#N/A
PDGFA	#N/A	#N/A	#N/A				#N/A	#N/A	#N/A
PDGFB	Pdgfb	Pdgfb	Pdgfb				#N/A	#N/A	#N/A
PDGFC	#N/A	#N/A	#N/A				#N/A	#N/A	#N/A
PDGFD	#N/A	#N/A	#N/A				#N/A	#N/A	#N/A
PDGFRL	#N/A	Pdgfrl	Pdgfrl				#N/A	#N/A	#N/A
PDYN	#N/A	#N/A	#N/A				#N/A	#N/A	#N/A
PEBP4	#N/A	#N/A	#N/A				#N/A	#N/A	#N/A
PENK	#N/A	#N/A	#N/A				#N/A	#N/A	#N/A
PF4	#N/A	#N/A	#N/A				#N/A	#N/A	#N/A
PF4V1	#N/A	#N/A	#N/A				#N/A	#N/A	#N/A
PGA3	#N/A	#N/A	#N/A				#N/A	#N/A	#N/A
PGA4	#N/A	#N/A	#N/A				#N/A	#N/A	#N/A
PGA5	#N/A	#N/A	#N/A				#N/A	#N/A	#N/A
PGC	#N/A	#N/A	#N/A				#N/A	#N/A	#N/A
PGF	#N/A	#N/A	#N/A				#N/A	#N/A	#N/A
PGLYRP1	Pglyrp1	Pglyrp1	Pglyrp1				#N/A	#N/A	#N/A
PGLYRP2	#N/A	#N/A	#N/A				#N/A	#N/A	#N/A
PGLYRP3	#N/A	#N/A	#N/A				#N/A	#N/A	#N/A
PGLYRP4	#N/A	#N/A	#N/A				#N/A	#N/A	#N/A
PI15	#N/A	#N/A	#N/A				#N/A	#N/A	#N/A
PI16	#N/A	#N/A	#N/A				#N/A	#N/A	#N/A
PI3	#N/A	#N/A	#N/A				#N/A	#N/A	#N/A
PIBF1	#N/A	#N/A	#N/A				#N/A	#N/A	#N/A
PILRA	#N/A	#N/A	Pilra				#N/A	#N/A	#N/A
PINLYP	#N/A	#N/A	#N/A				#N/A	#N/A	#N/A
PIP	#N/A	#N/A	#N/A				#N/A	#N/A	#N/A
PKDCC	#N/A	Pkdcc	Pkdcc				#N/A	#N/A	#N/A
PLA1A	#N/A	#N/A	#N/A				#N/A	#N/A	#N/A
PLA2G10	#N/A	Pla2g10	Pla2g10				#N/A	#N/A	#N/A
PLA2G12A	#N/A	#N/A	#N/A				#N/A	Pla2g12a	Pla2g12a
PLA2G12B	#N/A	#N/A	#N/A				#N/A	#N/A	#N/A
PLA2G1B	#N/A	#N/A	#N/A				#N/A	#N/A	#N/A
PLA2G2A	#N/A	#N/A	#N/A				#N/A	#N/A	#N/A
PLA2G2C	#N/A	#N/A	#N/A				#N/A	#N/A	#N/A
PLA2G2D	#N/A	#N/A	#N/A				Pla2g2d	#N/A	#N/A
PLA2G2E	#N/A	#N/A	#N/A				#N/A	#N/A	#N/A
PLA2G3	#N/A	#N/A	#N/A				#N/A	#N/A	#N/A
PLA2G5	#N/A	#N/A	#N/A				#N/A	#N/A	#N/A
PLA2G7	#N/A	#N/A	Pla2g7				#N/A	#N/A	#N/A
PLA2R1	#N/A	#N/A	#N/A				#N/A	#N/A	#N/A
PLAC1	#N/A	#N/A	#N/A				#N/A	#N/A	#N/A
PLAC9	#N/A	#N/A	#N/A				#N/A	#N/A	#N/A
PLAT	#N/A	Plat	Plat				#N/A	#N/A	#N/A
PLAU	#N/A	#N/A	#N/A				#N/A	#N/A	#N/A
PLG	#N/A	#N/A	#N/A				#N/A	#N/A	#N/A
PLGLB1	#N/A	#N/A	#N/A				#N/A	#N/A	#N/A
PLGLB2	#N/A	#N/A	#N/A				#N/A	#N/A	#N/A
PLOD3	#N/A	#N/A	Plod3				#N/A	#N/A	#N/A
PLTP	#N/A	#N/A	#N/A				#N/A	#N/A	#N/A
PM20D1	#N/A	#N/A	#N/A				#N/A	#N/A	#N/A
PMCH	#N/A	#N/A	#N/A				#N/A	#N/A	#N/A
PNLIP	#N/A	#N/A	#N/A				#N/A	#N/A	#N/A
PNLIPRP1	#N/A	#N/A	#N/A				Pnliprp1	Pnliprp1	Pnliprp1
PNLIPRP3	#N/A	#N/A	#N/A				#N/A	#N/A	#N/A
PNOC	#N/A	#N/A	#N/A				#N/A	#N/A	#N/A
PODN	#N/A	#N/A	#N/A				Podn	#N/A	#N/A
PODNL1	#N/A	#N/A	#N/A				#N/A	#N/A	#N/A
POMC	#N/A	#N/A	#N/A				#N/A	#N/A	#N/A
PON1	#N/A	#N/A	#N/A				#N/A	#N/A	#N/A
PON2	#N/A	#N/A	#N/A				#N/A	#N/A	#N/A
PON3	#N/A	#N/A	#N/A				#N/A	#N/A	#N/A
POSTN	#N/A	#N/A	#N/A				#N/A	#N/A	#N/A
PPBP	#N/A	#N/A	#N/A				#N/A	#N/A	#N/A
PPIA	#N/A	#N/A	#N/A				#N/A	#N/A	#N/A
PPIB	#N/A	#N/A	#N/A				#N/A	#N/A	Ppib
PPY	#N/A	#N/A	#N/A				#N/A	#N/A	#N/A
PRADC1	#N/A	#N/A	#N/A				#N/A	#N/A	#N/A
PRAP1	#N/A	#N/A	#N/A				#N/A	#N/A	#N/A
PRB1	#N/A	#N/A	#N/A				#N/A	#N/A	#N/A
PRB2	#N/A	#N/A	#N/A				#N/A	#N/A	#N/A
PRB3	#N/A	#N/A	#N/A				#N/A	#N/A	#N/A
PRB4	#N/A	#N/A	#N/A				#N/A	#N/A	#N/A
PRELP	#N/A	#N/A	#N/A				Prelp	Prelp	Prelp
PRG3	#N/A	#N/A	#N/A				#N/A	#N/A	#N/A
PRG4	#N/A	#N/A	#N/A				#N/A	#N/A	#N/A
PRH2	#N/A	#N/A	#N/A				#N/A	#N/A	#N/A
PRL	#N/A	#N/A	#N/A				#N/A	#N/A	#N/A
PRLH	#N/A	#N/A	#N/A				#N/A	#N/A	#N/A
PROC	#N/A	#N/A	#N/A				Proc	Proc	Proc
PROK1	#N/A	#N/A	#N/A				#N/A	#N/A	#N/A
PROK2	#N/A	#N/A	#N/A				#N/A	#N/A	#N/A
PROS1	#N/A	#N/A	#N/A				#N/A	#N/A	#N/A
PROZ	#N/A	#N/A	#N/A				#N/A	#N/A	#N/A
PRR27	#N/A	#N/A	#N/A				#N/A	#N/A	#N/A
PRR4	#N/A	#N/A	#N/A				#N/A	#N/A	#N/A
PRSS1	#N/A	#N/A	#N/A				#N/A	#N/A	#N/A
PRSS12	#N/A	#N/A	#N/A				#N/A	#N/A	#N/A
PRSS16	#N/A	#N/A	#N/A				Prss16	Prss16	#N/A
PRSS2	#N/A	#N/A	#N/A				#N/A	#N/A	#N/A
PRSS22	Prss22	Prss22	Prss22				#N/A	#N/A	#N/A
PRSS23	#N/A	#N/A	#N/A				#N/A	#N/A	#N/A
PRSS27	Prss27	Prss27	#N/A				#N/A	#N/A	#N/A
PRSS3	#N/A	#N/A	#N/A				#N/A	#N/A	#N/A
PRSS33	#N/A	#N/A	#N/A				#N/A	#N/A	#N/A
PRSS35	#N/A	#N/A	#N/A				#N/A	#N/A	#N/A
PRSS36	#N/A	#N/A	#N/A				#N/A	#N/A	#N/A
PRSS37	#N/A	#N/A	#N/A				#N/A	#N/A	#N/A
PRSS38	#N/A	#N/A	#N/A				#N/A	#N/A	#N/A
PRSS42	#N/A	#N/A	#N/A				#N/A	#N/A	#N/A
PRSS48	#N/A	#N/A	#N/A				#N/A	#N/A	#N/A
PRSS51	#N/A	#N/A	#N/A				#N/A	#N/A	#N/A
PRSS53	#N/A	#N/A	#N/A				#N/A	#N/A	Prss53
PRSS54	#N/A	#N/A	#N/A				#N/A	#N/A	#N/A
PRSS57	#N/A	#N/A	#N/A				#N/A	#N/A	#N/A
PRSS58	#N/A	#N/A	#N/A				#N/A	#N/A	#N/A
PRSS8	#N/A	#N/A	#N/A				#N/A	#N/A	Prss8
PRTN3	#N/A	Prtn3	Prtn3				#N/A	#N/A	#N/A
PSAPL1	Psapl1	Psapl1	Psapl1				#N/A	#N/A	#N/A
PSG1	#N/A	#N/A	#N/A				#N/A	#N/A	#N/A
PSG11	#N/A	#N/A	#N/A				#N/A	#N/A	#N/A
PSG2	#N/A	#N/A	#N/A				#N/A	#N/A	#N/A
PSG3	#N/A	#N/A	#N/A				#N/A	#N/A	#N/A
PSG4	#N/A	#N/A	#N/A				#N/A	#N/A	#N/A
PSG5	#N/A	#N/A	#N/A				#N/A	#N/A	#N/A
PSG6	#N/A	#N/A	#N/A				#N/A	#N/A	#N/A
PSG7	#N/A	#N/A	#N/A				#N/A	#N/A	#N/A
PSG8	#N/A	#N/A	#N/A				#N/A	#N/A	#N/A
PSG9	#N/A	#N/A	#N/A				#N/A	#N/A	#N/A
PSORS1C2	#N/A	#N/A	#N/A				#N/A	#N/A	#N/A
PSPN	#N/A	#N/A	#N/A				#N/A	#N/A	#N/A
PTEN	#N/A	#N/A	#N/A				#N/A	#N/A	#N/A
PTGDS	#N/A	#N/A	#N/A				#N/A	#N/A	#N/A
PTH	#N/A	#N/A	#N/A				#N/A	#N/A	#N/A
PTH2	#N/A	#N/A	#N/A				#N/A	#N/A	#N/A
PTHLH	#N/A	#N/A	#N/A				#N/A	#N/A	#N/A
PTK7	#N/A	#N/A	Ptk7				#N/A	#N/A	#N/A
PTN	#N/A	#N/A	#N/A				#N/A	#N/A	#N/A
PTPRS	#N/A	#N/A	#N/A				#N/A	#N/A	#N/A
PTPRZ1	#N/A	#N/A	#N/A				#N/A	Ptprz1	Ptprz1
PTX3	#N/A	#N/A	#N/A				#N/A	#N/A	#N/A
PTX4	#N/A	#N/A	#N/A				#N/A	#N/A	#N/A
PVR	Pvr	Pvr	Pvr				#N/A	#N/A	#N/A
PXDN	#N/A	#N/A	Pxdn				#N/A	#N/A	#N/A
PYY	#N/A	#N/A	Pyy				#N/A	#N/A	#N/A
PZP	#N/A	#N/A	#N/A				#N/A	#N/A	#N/A
QPCT	#N/A	#N/A	#N/A				#N/A	#N/A	#N/A
QRFP	#N/A	#N/A	#N/A				#N/A	#N/A	#N/A
QSOX1	Qsox1	Qsox1	Qsox1				#N/A	#N/A	#N/A
R3HDML	#N/A	#N/A	#N/A				#N/A	#N/A	#N/A
RAET1G	#N/A	#N/A	#N/A				#N/A	#N/A	#N/A
RARRES2	#N/A	#N/A	#N/A				#N/A	#N/A	#N/A
RBP3	#N/A	#N/A	#N/A				#N/A	#N/A	#N/A
RBP4	#N/A	#N/A	#N/A				#N/A	#N/A	#N/A
REG1A	#N/A	#N/A	#N/A				#N/A	#N/A	#N/A
REG1B	#N/A	#N/A	#N/A				#N/A	#N/A	#N/A
REG3A	#N/A	#N/A	#N/A				#N/A	#N/A	#N/A
REG3G	Reg3g	Reg3g	Reg3g				#N/A	#N/A	#N/A
REG4	#N/A	#N/A	Reg4				#N/A	#N/A	#N/A
RELN	#N/A	#N/A	#N/A				Reln	Reln	Reln
REN	#N/A	#N/A	#N/A				#N/A	#N/A	#N/A
RETN	#N/A	#N/A	#N/A				#N/A	#N/A	#N/A
RETNLB	#N/A	#N/A	#N/A				#N/A	#N/A	#N/A
RGMA	#N/A	#N/A	#N/A				#N/A	#N/A	#N/A
RLN1	#N/A	#N/A	#N/A				#N/A	#N/A	#N/A
RLN2	#N/A	#N/A	#N/A				#N/A	#N/A	#N/A
RLN3	#N/A	#N/A	#N/A				#N/A	#N/A	#N/A
RNASE1	#N/A	#N/A	#N/A				Rnase1	Rnase1	Rnase1
RNASE10	#N/A	#N/A	#N/A				#N/A	#N/A	#N/A
RNASE11	#N/A	#N/A	#N/A				#N/A	#N/A	#N/A
RNASE12	#N/A	#N/A	#N/A				#N/A	#N/A	#N/A
RNASE13	#N/A	#N/A	#N/A				#N/A	#N/A	#N/A
RNASE2	#N/A	#N/A	#N/A				#N/A	#N/A	#N/A
RNASE3	#N/A	#N/A	#N/A				#N/A	#N/A	#N/A
RNASE4	#N/A	#N/A	#N/A				#N/A	#N/A	#N/A
RNASE6	#N/A	#N/A	#N/A				#N/A	#N/A	#N/A
RNASE7	#N/A	#N/A	#N/A				#N/A	#N/A	#N/A
RNASE8	#N/A	#N/A	#N/A				#N/A	#N/A	#N/A
RNASE9	#N/A	#N/A	#N/A				#N/A	#N/A	#N/A
RNASET2	#N/A	#N/A	#N/A				#N/A	#N/A	#N/A
RNLS	#N/A	#N/A	#N/A				#N/A	#N/A	#N/A
RNPEP	#N/A	#N/A	#N/A				#N/A	#N/A	#N/A
RPTN	Rptn	#N/A	#N/A				#N/A	#N/A	#N/A
RS1	#N/A	#N/A	#N/A				#N/A	#N/A	#N/A
RSPO1	#N/A	#N/A	#N/A				#N/A	#N/A	#N/A
RSPO2	#N/A	#N/A	#N/A				Rspo2	Rspo2	Rspo2
RSPO3	#N/A	#N/A	#N/A				#N/A	#N/A	#N/A
RSPO4	#N/A	#N/A	#N/A				#N/A	#N/A	#N/A
RSPRY1	#N/A	#N/A	#N/A				#N/A	#N/A	#N/A
RTBDN	#N/A	#N/A	#N/A				#N/A	#N/A	#N/A
S100A12	#N/A	#N/A	#N/A				#N/A	#N/A	#N/A
S100A13	#N/A	#N/A	S100a13				#N/A	#N/A	#N/A
S100A7	#N/A	#N/A	#N/A				#N/A	#N/A	#N/A
S100A8	#N/A	#N/A	#N/A				#N/A	#N/A	#N/A
S100A9	S100a9	S100a9	S100a9				#N/A	#N/A	#N/A
SAA1	#N/A	#N/A	#N/A				#N/A	#N/A	#N/A
SAA2	#N/A	#N/A	#N/A				#N/A	#N/A	#N/A
SAA4	#N/A	#N/A	#N/A				#N/A	#N/A	#N/A
SBSN	#N/A	#N/A	#N/A				#N/A	#N/A	#N/A
SBSPON	#N/A	#N/A	#N/A				Sbspon	Sbspon	Sbspon
SCG2	#N/A	#N/A	#N/A				#N/A	#N/A	#N/A
SCG3	#N/A	#N/A	#N/A				#N/A	#N/A	#N/A
SCG5	#N/A	#N/A	#N/A				#N/A	#N/A	#N/A
SCGB1A1	#N/A	Scgb1a1	#N/A				#N/A	#N/A	#N/A
SCGB1C1	#N/A	#N/A	#N/A				#N/A	#N/A	#N/A
SCGB1C2	#N/A	#N/A	#N/A				#N/A	#N/A	#N/A
SCGB1D1	#N/A	#N/A	#N/A				#N/A	#N/A	#N/A
SCGB1D2	#N/A	#N/A	#N/A				#N/A	#N/A	#N/A
SCGB1D4	#N/A	#N/A	#N/A				#N/A	#N/A	#N/A
SCGB2A1	#N/A	#N/A	#N/A				#N/A	#N/A	#N/A
SCGB2A2	#N/A	#N/A	#N/A				#N/A	#N/A	#N/A
SCGB2B2	#N/A	#N/A	#N/A				#N/A	#N/A	#N/A
SCGB3A1	Scgb3a1	Scgb3a1	#N/A				#N/A	#N/A	#N/A
SCGB3A2	#N/A	#N/A	#N/A				#N/A	#N/A	#N/A
SCPEP1	Scpep1	Scpep1	Scpep1				#N/A	#N/A	#N/A
SCRG1	#N/A	#N/A	#N/A				#N/A	#N/A	#N/A
SCT	#N/A	#N/A	#N/A				#N/A	#N/A	#N/A
SCUBE1	#N/A	#N/A	#N/A				#N/A	#N/A	#N/A
SCUBE2	#N/A	#N/A	#N/A				Scube2	Scube2	Scube2
SCUBE3	#N/A	#N/A	#N/A				#N/A	#N/A	#N/A
SDC1	#N/A	Sdc1	Sdc1				#N/A	#N/A	#N/A
SDC4	#N/A	#N/A	#N/A				#N/A	#N/A	#N/A
SECTM1	#N/A	#N/A	#N/A				#N/A	#N/A	#N/A
SELENOP	#N/A	#N/A	#N/A				#N/A	#N/A	#N/A
SEMA3A	#N/A	#N/A	#N/A				#N/A	#N/A	#N/A
SEMA3B	#N/A	#N/A	#N/A				#N/A	#N/A	#N/A
SEMA3C	#N/A	#N/A	#N/A				#N/A	#N/A	Sema3c
SEMA3D	#N/A	#N/A	#N/A				#N/A	#N/A	#N/A
SEMA3E	#N/A	#N/A	#N/A				#N/A	#N/A	#N/A
SEMA3F	#N/A	#N/A	#N/A				#N/A	#N/A	#N/A
SEMA3G	#N/A	#N/A	#N/A				#N/A	#N/A	#N/A
SEMG1	#N/A	#N/A	#N/A				#N/A	#N/A	#N/A
SEMG2	#N/A	#N/A	#N/A				#N/A	#N/A	#N/A
SERPINA1	#N/A	#N/A	#N/A				#N/A	#N/A	#N/A
SERPINA10	#N/A	#N/A	#N/A				#N/A	#N/A	#N/A
SERPINA11	#N/A	#N/A	#N/A				#N/A	#N/A	#N/A
SERPINA12	#N/A	#N/A	#N/A				#N/A	#N/A	#N/A
SERPINA3	#N/A	#N/A	#N/A				#N/A	#N/A	#N/A
SERPINA4	#N/A	#N/A	#N/A				#N/A	#N/A	#N/A
SERPINA5	#N/A	#N/A	#N/A				#N/A	Serpina5	Serpina5
SERPINA6	#N/A	#N/A	#N/A				#N/A	#N/A	#N/A
SERPINA7	#N/A	#N/A	#N/A				#N/A	#N/A	#N/A
SERPINA9	#N/A	#N/A	#N/A				#N/A	#N/A	#N/A
SERPINC1	#N/A	#N/A	#N/A				#N/A	#N/A	#N/A
SERPIND1	#N/A	#N/A	#N/A				#N/A	#N/A	#N/A
SERPINE1	#N/A	Serpine1	Serpine1				#N/A	#N/A	#N/A
SERPINE2	#N/A	#N/A	#N/A				#N/A	#N/A	#N/A
SERPINE3	#N/A	#N/A	#N/A				Serpine3	#N/A	#N/A
SERPINF1	#N/A	#N/A	#N/A				#N/A	#N/A	#N/A
SERPINF2	#N/A	#N/A	#N/A				#N/A	#N/A	#N/A
SERPING1	#N/A	#N/A	#N/A				#N/A	#N/A	#N/A
SERPINI1	#N/A	#N/A	Serpini1				#N/A	#N/A	#N/A
SERPINI2	#N/A	#N/A	#N/A				#N/A	#N/A	#N/A
SFN	Sfn	Sfn	Sfn				#N/A	#N/A	#N/A
SFRP1	#N/A	#N/A	#N/A				#N/A	#N/A	#N/A
SFRP2	#N/A	#N/A	#N/A				#N/A	#N/A	#N/A
SFRP4	#N/A	#N/A	#N/A				#N/A	#N/A	#N/A
SFRP5	#N/A	#N/A	#N/A				#N/A	#N/A	#N/A
SFTA2	#N/A	#N/A	#N/A				#N/A	#N/A	#N/A
SFTA3	#N/A	#N/A	#N/A				#N/A	#N/A	#N/A
SFTPA1	#N/A	#N/A	#N/A				#N/A	#N/A	#N/A
SFTPA2	#N/A	#N/A	#N/A				#N/A	#N/A	#N/A
SFTPB	#N/A	#N/A	#N/A				#N/A	#N/A	#N/A
SFTPC	#N/A	#N/A	#N/A				#N/A	#N/A	#N/A
SFTPD	Sftpd	Sftpd	Sftpd				#N/A	#N/A	#N/A
SHBG	#N/A	#N/A	#N/A				#N/A	#N/A	#N/A
SHE	#N/A	#N/A	#N/A				#N/A	#N/A	#N/A
SIRPD	#N/A	#N/A	#N/A				#N/A	#N/A	#N/A
SLAMF1	#N/A	#N/A	#N/A				#N/A	#N/A	#N/A
SLIT1	#N/A	#N/A	#N/A				#N/A	#N/A	#N/A
SLIT2	#N/A	#N/A	#N/A				#N/A	#N/A	#N/A
SLIT3	#N/A	#N/A	#N/A				#N/A	#N/A	#N/A
SLITRK1	#N/A	#N/A	#N/A				#N/A	#N/A	#N/A
SLPI	#N/A	Slpi	Slpi				#N/A	#N/A	#N/A
SLURP1	#N/A	#N/A	#N/A				#N/A	#N/A	#N/A
SLURP2	#N/A	#N/A	#N/A				#N/A	#N/A	#N/A
SMIM31	#N/A	#N/A	#N/A				#N/A	#N/A	#N/A
SMOC1	#N/A	#N/A	#N/A				#N/A	#N/A	#N/A
SMOC2	#N/A	#N/A	#N/A				#N/A	#N/A	#N/A
SMPD1	#N/A	#N/A	#N/A				#N/A	#N/A	#N/A
SMPDL3A	#N/A	#N/A	#N/A				#N/A	#N/A	#N/A
SMPDL3B	Smpdl3b	Smpdl3b	Smpdl3b				#N/A	#N/A	#N/A
SMR3A	#N/A	#N/A	#N/A				#N/A	#N/A	#N/A
SMR3B	#N/A	#N/A	#N/A				#N/A	#N/A	#N/A
SNED1	#N/A	#N/A	#N/A				#N/A	#N/A	#N/A
SOD3	#N/A	#N/A	#N/A				#N/A	#N/A	#N/A
SOGA1	#N/A	#N/A	#N/A				#N/A	#N/A	#N/A
SORL1	#N/A	#N/A	#N/A				#N/A	#N/A	#N/A
SOST	#N/A	#N/A	#N/A				Sost	Sost	Sost
SOSTDC1	#N/A	#N/A	#N/A				Sostdc1	#N/A	#N/A
SPACA3	#N/A	#N/A	#N/A				#N/A	#N/A	#N/A
SPACA5	#N/A	#N/A	#N/A				#N/A	#N/A	#N/A
SPACA5B	#N/A	#N/A	#N/A				#N/A	#N/A	#N/A
SPACA7	#N/A	#N/A	#N/A				#N/A	#N/A	#N/A
SPAG11A	#N/A	#N/A	#N/A				#N/A	#N/A	#N/A
SPAG11B	#N/A	#N/A	#N/A				#N/A	#N/A	#N/A
SPARC	#N/A	#N/A	#N/A				#N/A	#N/A	#N/A
SPARCL1	#N/A	#N/A	#N/A				#N/A	#N/A	#N/A
SPATA20	#N/A	#N/A	#N/A				#N/A	#N/A	#N/A
SPINK1	#N/A	#N/A	#N/A				#N/A	#N/A	#N/A
SPINK13	#N/A	#N/A	#N/A				#N/A	#N/A	#N/A
SPINK14	#N/A	#N/A	#N/A				#N/A	#N/A	#N/A
SPINK2	#N/A	#N/A	#N/A				#N/A	#N/A	#N/A
SPINK4	#N/A	#N/A	#N/A				#N/A	#N/A	#N/A
SPINK5	#N/A	#N/A	#N/A				#N/A	#N/A	Spink5
SPINK6	#N/A	#N/A	#N/A				#N/A	#N/A	#N/A
SPINK7	#N/A	#N/A	#N/A				#N/A	#N/A	#N/A
SPINK8	#N/A	#N/A	#N/A				#N/A	#N/A	#N/A
SPINK9	#N/A	#N/A	#N/A				#N/A	#N/A	#N/A
SPINT1	#N/A	#N/A	#N/A				#N/A	#N/A	#N/A
SPINT3	#N/A	#N/A	#N/A				#N/A	#N/A	#N/A
SPINT4	#N/A	#N/A	#N/A				#N/A	#N/A	#N/A
SPOCK1	#N/A	#N/A	#N/A				#N/A	#N/A	Spock1
SPOCK2	#N/A	#N/A	#N/A				Spock2	Spock2	#N/A
SPOCK3	#N/A	#N/A	#N/A				#N/A	#N/A	#N/A
SPON1	#N/A	#N/A	#N/A				#N/A	#N/A	#N/A
SPON2	#N/A	#N/A	#N/A				#N/A	#N/A	#N/A
SPP1	#N/A	#N/A	Spp1				#N/A	#N/A	#N/A
SPP2	#N/A	#N/A	#N/A				#N/A	#N/A	#N/A
SPTY2D1OS	#N/A	#N/A	#N/A				#N/A	#N/A	#N/A
SPX	#N/A	#N/A	#N/A				#N/A	#N/A	#N/A
SRPX	#N/A	#N/A	#N/A				#N/A	#N/A	#N/A
SRPX2	#N/A	#N/A	#N/A				#N/A	#N/A	#N/A
SSC4D	#N/A	#N/A	#N/A				#N/A	#N/A	#N/A
SSC5D	#N/A	#N/A	#N/A				#N/A	#N/A	#N/A
SSPO	#N/A	#N/A	#N/A				#N/A	#N/A	#N/A
SST	#N/A	#N/A	#N/A				#N/A	#N/A	#N/A
ST6GAL1	#N/A	#N/A	#N/A				#N/A	#N/A	#N/A
STATH	#N/A	#N/A	#N/A				#N/A	#N/A	#N/A
STC1	#N/A	#N/A	#N/A				#N/A	#N/A	#N/A
STC2	#N/A	#N/A	#N/A				#N/A	#N/A	#N/A
SVBP	#N/A	#N/A	#N/A				#N/A	#N/A	#N/A
TAC1	#N/A	#N/A	#N/A				#N/A	#N/A	#N/A
TAC3	#N/A	#N/A	#N/A				#N/A	#N/A	#N/A
TAC4	#N/A	#N/A	#N/A				#N/A	#N/A	#N/A
TBL2	#N/A	#N/A	#N/A				#N/A	#N/A	#N/A
TCN1	#N/A	#N/A	#N/A				#N/A	#N/A	#N/A
TCN2	#N/A	#N/A	#N/A				#N/A	#N/A	#N/A
TDGF1	#N/A	#N/A	#N/A				#N/A	#N/A	#N/A
TECTA	#N/A	#N/A	#N/A				#N/A	#N/A	#N/A
TECTB	#N/A	#N/A	#N/A				#N/A	#N/A	#N/A
TEK	#N/A	#N/A	#N/A				#N/A	#N/A	#N/A
TEPP	#N/A	#N/A	#N/A				#N/A	#N/A	#N/A
TEX101	#N/A	#N/A	#N/A				#N/A	#N/A	#N/A
TEX264	#N/A	#N/A	#N/A				#N/A	#N/A	#N/A
TF	#N/A	#N/A	#N/A				#N/A	#N/A	#N/A
TFF1	#N/A	#N/A	#N/A				#N/A	#N/A	#N/A
TFF2	#N/A	#N/A	#N/A				#N/A	#N/A	#N/A
TFF3	Tff3	Tff3	Tff3				#N/A	#N/A	#N/A
TFPI	#N/A	#N/A	#N/A				Tfpi	#N/A	#N/A
TFPI2	#N/A	#N/A	#N/A				#N/A	#N/A	#N/A
TFRC	Tfrc	Tfrc	Tfrc				#N/A	#N/A	#N/A
TG	#N/A	#N/A	#N/A				#N/A	#N/A	#N/A
TGFA	#N/A	#N/A	#N/A				#N/A	#N/A	#N/A
TGFB1	#N/A	#N/A	Tgfb1				#N/A	#N/A	#N/A
TGFB2	#N/A	#N/A	#N/A				Tgfb2	#N/A	#N/A
TGFB3	#N/A	#N/A	#N/A				#N/A	#N/A	#N/A
TGFBI	#N/A	#N/A	#N/A				#N/A	#N/A	#N/A
TGFBR3	#N/A	#N/A	#N/A				Tgfbr3	#N/A	#N/A
THBS1	#N/A	Thbs1	Thbs1				#N/A	#N/A	#N/A
THBS2	#N/A	#N/A	#N/A				#N/A	#N/A	#N/A
THBS3	#N/A	#N/A	#N/A				#N/A	#N/A	#N/A
THBS4	#N/A	#N/A	#N/A				#N/A	#N/A	#N/A
THEM6	#N/A	#N/A	#N/A				#N/A	#N/A	#N/A
THNSL2	#N/A	#N/A	#N/A				#N/A	Thnsl2	Thnsl2
THPO	#N/A	Thpo	Thpo				#N/A	#N/A	#N/A
THSD4	#N/A	#N/A	#N/A				#N/A	#N/A	#N/A
THSD7A	#N/A	#N/A	#N/A				#N/A	#N/A	#N/A
TIMP1	Timp1	Timp1	Timp1				#N/A	#N/A	#N/A
TIMP2	#N/A	#N/A	#N/A				#N/A	#N/A	#N/A
TIMP3	#N/A	#N/A	#N/A				#N/A	#N/A	#N/A
TIMP4	#N/A	#N/A	#N/A				Timp4	Timp4	Timp4
TINAG	#N/A	Tinag	Tinag				#N/A	#N/A	#N/A
TINAGL1	#N/A	#N/A	#N/A				#N/A	#N/A	#N/A
TLL1	#N/A	#N/A	#N/A				Tll1	#N/A	#N/A
TLL2	#N/A	#N/A	#N/A				#N/A	#N/A	#N/A
TMEFF2	#N/A	#N/A	#N/A				#N/A	#N/A	#N/A
TMEM155	#N/A	#N/A	#N/A				#N/A	#N/A	#N/A
TNC	#N/A	#N/A	#N/A				#N/A	#N/A	#N/A
TNF	Tnf	Tnf	Tnf				#N/A	#N/A	#N/A
TNFAIP6	#N/A	#N/A	#N/A				#N/A	#N/A	#N/A
TNFRSF11B	#N/A	Tnfrsf11b	Tnfrsf11b				#N/A	#N/A	#N/A
TNFRSF18	#N/A	#N/A	#N/A				#N/A	#N/A	#N/A
TNFRSF1A	#N/A	#N/A	#N/A				#N/A	#N/A	#N/A
TNFRSF1B	Tnfrsf1b	Tnfrsf1b	Tnfrsf1b				#N/A	#N/A	#N/A
TNFRSF25	#N/A	#N/A	Tnfrsf25				#N/A	#N/A	#N/A
TNFRSF6B	#N/A	#N/A	#N/A				#N/A	#N/A	#N/A
TNFSF10	Tnfsf10	Tnfsf10	Tnfsf10				#N/A	#N/A	#N/A
TNFSF11	#N/A	#N/A	#N/A				#N/A	#N/A	#N/A
TNFSF12	#N/A	#N/A	#N/A				Tnfsf12	#N/A	#N/A
TNFSF13	#N/A	#N/A	#N/A				#N/A	#N/A	#N/A
TNFSF13B	#N/A	#N/A	#N/A				#N/A	#N/A	#N/A
TNFSF14	#N/A	#N/A	#N/A				#N/A	#N/A	#N/A
TNFSF15	#N/A	#N/A	#N/A				#N/A	#N/A	#N/A
TNN	#N/A	#N/A	#N/A				#N/A	#N/A	#N/A
TNR	#N/A	#N/A	#N/A				#N/A	#N/A	#N/A
TNXB	#N/A	#N/A	#N/A				#N/A	#N/A	Tnxb
TOR2A	#N/A	#N/A	#N/A				#N/A	#N/A	#N/A
TPSAB1	#N/A	#N/A	#N/A				#N/A	#N/A	#N/A
TPSB2	#N/A	#N/A	#N/A				Tpsb2	#N/A	Tpsb2
TREML4	#N/A	#N/A	#N/A				#N/A	#N/A	#N/A
TRH	#N/A	#N/A	#N/A				#N/A	#N/A	#N/A
TSHB	#N/A	#N/A	#N/A				#N/A	#N/A	#N/A
TSKU	#N/A	Tsku	Tsku				#N/A	#N/A	#N/A
TSLP	#N/A	#N/A	#N/A				#N/A	#N/A	#N/A
TSPEAR	#N/A	#N/A	#N/A				#N/A	#N/A	#N/A
TTC9B	#N/A	#N/A	#N/A				#N/A	#N/A	#N/A
TTR	#N/A	Ttr	Ttr				#N/A	#N/A	#N/A
TUFT1	#N/A	#N/A	#N/A				#N/A	#N/A	#N/A
TULP2	#N/A	#N/A	#N/A				Tulp2	Tulp2	#N/A
TULP3	#N/A	#N/A	#N/A				#N/A	#N/A	#N/A
TWSG1	#N/A	#N/A	#N/A				#N/A	#N/A	#N/A
TXNDC16	Txndc16	Txndc16	#N/A				#N/A	#N/A	#N/A
UCMA	#N/A	#N/A	#N/A				#N/A	#N/A	#N/A
UCN	#N/A	#N/A	#N/A				#N/A	#N/A	#N/A
UCN2	#N/A	#N/A	#N/A				#N/A	#N/A	#N/A
UCN3	#N/A	#N/A	#N/A				#N/A	#N/A	#N/A
ULBP2	#N/A	#N/A	#N/A				#N/A	#N/A	#N/A
UMOD	#N/A	#N/A	#N/A				#N/A	#N/A	#N/A
UTS2	#N/A	#N/A	#N/A				#N/A	#N/A	#N/A
UTS2B	#N/A	#N/A	#N/A				#N/A	#N/A	#N/A
VASH1	#N/A	#N/A	#N/A				#N/A	#N/A	#N/A
VASH2	#N/A	#N/A	#N/A				#N/A	#N/A	#N/A
VASN	#N/A	#N/A	#N/A				#N/A	#N/A	#N/A
VCAN	#N/A	#N/A	#N/A				#N/A	#N/A	#N/A
VEGFA	#N/A	#N/A	#N/A				#N/A	#N/A	#N/A
VEGFB	#N/A	#N/A	#N/A				#N/A	#N/A	#N/A
VEGFC	#N/A	#N/A	#N/A				#N/A	#N/A	#N/A
VEGFD	#N/A	#N/A	#N/A				#N/A	#N/A	#N/A
VGF	#N/A	#N/A	#N/A				#N/A	#N/A	#N/A
VIP	#N/A	#N/A	#N/A				#N/A	#N/A	Vip
VIT	#N/A	#N/A	#N/A				#N/A	#N/A	#N/A
VMO1	#N/A	#N/A	#N/A				#N/A	#N/A	#N/A
VNN3	#N/A	#N/A	#N/A				#N/A	#N/A	#N/A
VSTM1	#N/A	#N/A	#N/A				#N/A	#N/A	#N/A
VSTM2A	#N/A	#N/A	#N/A				#N/A	#N/A	#N/A
VSTM2L	#N/A	#N/A	#N/A				#N/A	#N/A	#N/A
VSTM4	#N/A	#N/A	#N/A				#N/A	#N/A	#N/A
VTN	#N/A	#N/A	#N/A				#N/A	#N/A	#N/A
VWA1	#N/A	#N/A	#N/A				#N/A	#N/A	#N/A
VWA2	#N/A	#N/A	#N/A				#N/A	Vwa2	Vwa2
VWA3A	#N/A	#N/A	#N/A				#N/A	#N/A	#N/A
VWA5B1	#N/A	#N/A	#N/A				#N/A	#N/A	#N/A
VWA7	#N/A	#N/A	#N/A				#N/A	#N/A	#N/A
VWC2	#N/A	#N/A	#N/A				#N/A	Vwc2	Vwc2
VWC2L	#N/A	#N/A	#N/A				#N/A	#N/A	#N/A
VWCE	#N/A	#N/A	#N/A				#N/A	#N/A	#N/A
VWDE	#N/A	#N/A	#N/A				#N/A	#N/A	#N/A
VWF	#N/A	#N/A	#N/A				#N/A	#N/A	#N/A
WDR25	#N/A	#N/A	#N/A				#N/A	#N/A	#N/A
WFDC1	#N/A	#N/A	#N/A				Wfdc1	#N/A	#N/A
WFDC10A	#N/A	#N/A	#N/A				#N/A	#N/A	#N/A
WFDC10B	#N/A	#N/A	#N/A				#N/A	#N/A	#N/A
WFDC11	#N/A	#N/A	#N/A				#N/A	#N/A	#N/A
WFDC12	#N/A	#N/A	#N/A				#N/A	#N/A	#N/A
WFDC13	#N/A	#N/A	#N/A				#N/A	#N/A	#N/A
WFDC2	Wfdc2	Wfdc2	Wfdc2				#N/A	#N/A	#N/A
WFDC3	#N/A	#N/A	#N/A				Wfdc3	Wfdc3	Wfdc3
WFDC5	#N/A	#N/A	#N/A				#N/A	#N/A	#N/A
WFDC6	#N/A	#N/A	#N/A				#N/A	#N/A	#N/A
WFDC8	#N/A	#N/A	#N/A				Wfdc8	#N/A	#N/A
WFDC9	#N/A	#N/A	#N/A				#N/A	#N/A	#N/A
WFIKKN1	#N/A	#N/A	#N/A				#N/A	#N/A	#N/A
WFIKKN2	#N/A	#N/A	#N/A				#N/A	#N/A	#N/A
WIF1	#N/A	#N/A	#N/A				Wif1	Wif1	Wif1
WISP1	#N/A	#N/A	#N/A				#N/A	#N/A	#N/A
WISP2	#N/A	#N/A	#N/A				#N/A	#N/A	#N/A
WISP3	#N/A	#N/A	#N/A				#N/A	#N/A	#N/A
WNT1	#N/A	#N/A	#N/A				#N/A	#N/A	#N/A
WNT10A	#N/A	#N/A	#N/A				#N/A	#N/A	#N/A
WNT10B	#N/A	#N/A	#N/A				Wnt10b	#N/A	#N/A
WNT11	#N/A	#N/A	Wnt11				#N/A	#N/A	#N/A
WNT16	#N/A	#N/A	#N/A				#N/A	#N/A	#N/A
WNT2	#N/A	#N/A	#N/A				#N/A	#N/A	#N/A
WNT2B	#N/A	#N/A	#N/A				Wnt2b	Wnt2b	#N/A
WNT3	#N/A	#N/A	#N/A				#N/A	#N/A	#N/A
WNT3A	#N/A	#N/A	#N/A				#N/A	#N/A	#N/A
WNT4	#N/A	#N/A	#N/A				#N/A	#N/A	#N/A
WNT5A	#N/A	#N/A	#N/A				#N/A	#N/A	#N/A
WNT5B	#N/A	#N/A	#N/A				Wnt5b	Wnt5b	Wnt5b
WNT6	#N/A	#N/A	#N/A				#N/A	#N/A	#N/A
WNT7A	#N/A	#N/A	#N/A				#N/A	#N/A	#N/A
WNT7B	Wnt7b	#N/A	#N/A				#N/A	#N/A	#N/A
WNT8A	#N/A	#N/A	#N/A				#N/A	#N/A	#N/A
WNT8B	#N/A	#N/A	#N/A				#N/A	#N/A	#N/A
WNT9A	#N/A	#N/A	#N/A				#N/A	#N/A	#N/A
WNT9B	#N/A	#N/A	#N/A				#N/A	#N/A	#N/A
XCL1	#N/A	Xcl1	#N/A				#N/A	#N/A	#N/A
XCL2	#N/A	#N/A	#N/A				#N/A	#N/A	#N/A
XYLT1	#N/A	#N/A	#N/A				#N/A	#N/A	#N/A
XYLT2	#N/A	#N/A	#N/A				#N/A	#N/A	#N/A
ZG16	#N/A	#N/A	#N/A				#N/A	#N/A	#N/A
ZG16B	#N/A	#N/A	#N/A				#N/A	#N/A	#N/A
ZP1	#N/A	#N/A	#N/A				#N/A	#N/A	#N/A
ZP2	#N/A	#N/A	#N/A				#N/A	#N/A	#N/A
ZP3	#N/A	#N/A	#N/A				#N/A	#N/A	#N/A
ZP4	#N/A	#N/A	#N/A				#N/A	#N/A	#N/A
ZPBP	#N/A	#N/A	#N/A				#N/A	#N/A	#N/A
ZPBP2	#N/A	#N/A	#N/A				#N/A	Zpbp2	Zpbp2

## Sheet: VP
PROTEIN CLASS	PTEN - Up						PTEN - Down
Gene	PIN	MED	ADV				PIN	MED	ADV
A1BG	#N/A	#N/A	#N/A				#N/A	#N/A	#N/A
A2M	#N/A	#N/A	#N/A				#N/A	#N/A	#N/A
A2ML1	#N/A	#N/A	#N/A				#N/A	#N/A	#N/A
AADACL2	#N/A	#N/A	#N/A				#N/A	#N/A	#N/A
ABHD15	#N/A	#N/A	#N/A				#N/A	#N/A	#N/A
ABI3BP	#N/A	#N/A	#N/A				#N/A	#N/A	#N/A
ABO	#N/A	#N/A	#N/A				#N/A	Abo	Abo
AC008687.1	#N/A	#N/A	#N/A				#N/A	#N/A	#N/A
AC233755.1	#N/A	#N/A	#N/A				#N/A	#N/A	#N/A
ACAN	#N/A	#N/A	#N/A				#N/A	#N/A	#N/A
ACE	#N/A	#N/A	#N/A				#N/A	#N/A	#N/A
ACE2	#N/A	#N/A	#N/A				#N/A	#N/A	#N/A
ACP7	#N/A	#N/A	#N/A				#N/A	#N/A	#N/A
ACPP	#N/A	#N/A	#N/A				#N/A	#N/A	#N/A
ACR	#N/A	#N/A	#N/A				#N/A	#N/A	#N/A
ADA2	#N/A	#N/A	#N/A				#N/A	#N/A	#N/A
ADAM12	#N/A	#N/A	#N/A				#N/A	#N/A	#N/A
ADAM28	#N/A	#N/A	#N/A				#N/A	#N/A	#N/A
ADAM9	#N/A	#N/A	#N/A				#N/A	#N/A	#N/A
ADAMDEC1	#N/A	#N/A	#N/A				#N/A	#N/A	#N/A
ADAMTS1	#N/A	#N/A	#N/A				#N/A	#N/A	#N/A
ADAMTS10	#N/A	#N/A	#N/A				#N/A	#N/A	#N/A
ADAMTS12	#N/A	#N/A	#N/A				#N/A	#N/A	#N/A
ADAMTS13	#N/A	#N/A	#N/A				#N/A	#N/A	#N/A
ADAMTS14	#N/A	#N/A	#N/A				#N/A	#N/A	#N/A
ADAMTS15	#N/A	#N/A	#N/A				#N/A	#N/A	#N/A
ADAMTS16	#N/A	#N/A	#N/A				#N/A	#N/A	#N/A
ADAMTS17	#N/A	#N/A	#N/A				#N/A	#N/A	#N/A
ADAMTS18	#N/A	#N/A	#N/A				#N/A	#N/A	#N/A
ADAMTS19	#N/A	#N/A	#N/A				#N/A	#N/A	#N/A
ADAMTS2	#N/A	#N/A	#N/A				#N/A	#N/A	#N/A
ADAMTS20	#N/A	#N/A	#N/A				#N/A	#N/A	#N/A
ADAMTS3	#N/A	#N/A	#N/A				#N/A	#N/A	#N/A
ADAMTS4	#N/A	#N/A	Adamts4				#N/A	#N/A	#N/A
ADAMTS5	#N/A	#N/A	#N/A				#N/A	#N/A	#N/A
ADAMTS6	#N/A	#N/A	#N/A				#N/A	#N/A	#N/A
ADAMTS7	#N/A	#N/A	#N/A				#N/A	#N/A	#N/A
ADAMTS8	#N/A	#N/A	#N/A				Adamts8	Adamts8	Adamts8
ADAMTS9	#N/A	#N/A	#N/A				#N/A	#N/A	#N/A
ADAMTSL1	#N/A	#N/A	#N/A				#N/A	#N/A	#N/A
ADAMTSL2	#N/A	#N/A	#N/A				#N/A	#N/A	#N/A
ADAMTSL3	#N/A	#N/A	#N/A				#N/A	#N/A	#N/A
ADAMTSL4	#N/A	#N/A	#N/A				#N/A	#N/A	#N/A
ADAMTSL5	#N/A	#N/A	#N/A				#N/A	#N/A	#N/A
ADCK1	#N/A	#N/A	#N/A				#N/A	#N/A	#N/A
ADCYAP1	#N/A	#N/A	#N/A				#N/A	#N/A	#N/A
ADGRB1	#N/A	#N/A	#N/A				#N/A	#N/A	#N/A
ADGRE3	#N/A	#N/A	#N/A				#N/A	#N/A	#N/A
ADGRE5	#N/A	#N/A	#N/A				#N/A	#N/A	#N/A
ADGRF1	#N/A	#N/A	#N/A				#N/A	#N/A	#N/A
ADGRG1	#N/A	#N/A	#N/A				#N/A	#N/A	#N/A
ADIPOQ	#N/A	#N/A	#N/A				#N/A	#N/A	#N/A
ADM	#N/A	#N/A	#N/A				#N/A	#N/A	#N/A
ADM2	#N/A	#N/A	Adm2				#N/A	#N/A	#N/A
ADM5	#N/A	#N/A	#N/A				#N/A	#N/A	#N/A
AEBP1	#N/A	#N/A	#N/A				#N/A	#N/A	#N/A
AFM	#N/A	#N/A	#N/A				#N/A	#N/A	#N/A
AFP	#N/A	#N/A	#N/A				#N/A	#N/A	#N/A
AGER	#N/A	#N/A	#N/A				#N/A	#N/A	#N/A
AGGF1	#N/A	#N/A	#N/A				#N/A	#N/A	#N/A
AGRN	#N/A	Agrn	#N/A				#N/A	#N/A	#N/A
AGRP	#N/A	#N/A	#N/A				#N/A	#N/A	#N/A
AGT	#N/A	#N/A	#N/A				#N/A	#N/A	#N/A
AHSG	#N/A	#N/A	Ahsg				#N/A	#N/A	#N/A
AIMP1	#N/A	#N/A	#N/A				#N/A	#N/A	#N/A
AKR1B10	#N/A	#N/A	#N/A				#N/A	#N/A	#N/A
ALB	#N/A	#N/A	#N/A				#N/A	#N/A	#N/A
ALKAL1	#N/A	#N/A	#N/A				#N/A	#N/A	#N/A
ALKAL2	#N/A	#N/A	#N/A				#N/A	#N/A	#N/A
AMBN	#N/A	#N/A	#N/A				#N/A	#N/A	#N/A
AMBP	#N/A	#N/A	#N/A				#N/A	#N/A	#N/A
AMELX	#N/A	#N/A	#N/A				#N/A	#N/A	#N/A
AMELY	#N/A	#N/A	#N/A				#N/A	#N/A	#N/A
AMH	#N/A	#N/A	#N/A				#N/A	#N/A	#N/A
AMTN	#N/A	#N/A	#N/A				#N/A	#N/A	#N/A
AMY1A	#N/A	#N/A	#N/A				#N/A	#N/A	#N/A
AMY1B	#N/A	#N/A	#N/A				#N/A	#N/A	#N/A
AMY1C	#N/A	#N/A	#N/A				#N/A	#N/A	#N/A
AMY2A	#N/A	#N/A	#N/A				#N/A	#N/A	#N/A
AMY2B	#N/A	#N/A	#N/A				#N/A	#N/A	#N/A
ANG	#N/A	#N/A	#N/A				#N/A	#N/A	#N/A
ANGPT1	#N/A	#N/A	Angpt1				#N/A	#N/A	#N/A
ANGPT2	#N/A	#N/A	#N/A				#N/A	#N/A	#N/A
ANGPT4	#N/A	#N/A	#N/A				#N/A	#N/A	#N/A
ANGPTL1	#N/A	#N/A	#N/A				#N/A	#N/A	#N/A
ANGPTL2	#N/A	#N/A	#N/A				#N/A	#N/A	#N/A
ANGPTL3	#N/A	#N/A	#N/A				#N/A	#N/A	#N/A
ANGPTL4	#N/A	#N/A	#N/A				#N/A	#N/A	#N/A
ANGPTL5	#N/A	#N/A	#N/A				#N/A	#N/A	#N/A
ANGPTL6	#N/A	#N/A	#N/A				#N/A	#N/A	#N/A
ANGPTL7	#N/A	#N/A	#N/A				#N/A	#N/A	Angptl7
ANGPTL8	#N/A	#N/A	#N/A				#N/A	#N/A	#N/A
ANKDD1A	#N/A	#N/A	#N/A				#N/A	#N/A	#N/A
ANOS1	#N/A	#N/A	#N/A				#N/A	#N/A	#N/A
ANXA1	Anxa1	Anxa1	Anxa1				#N/A	#N/A	#N/A
ANXA2	#N/A	Anxa2	#N/A				#N/A	#N/A	#N/A
AOAH	#N/A	#N/A	#N/A				#N/A	#N/A	#N/A
AOC1	#N/A	#N/A	#N/A				#N/A	#N/A	#N/A
AOC3	#N/A	#N/A	#N/A				#N/A	Aoc3	Aoc3
AP000790.4	#N/A	#N/A	#N/A				#N/A	#N/A	#N/A
AP002347.1	#N/A	#N/A	#N/A				#N/A	#N/A	#N/A
APCS	#N/A	#N/A	#N/A				#N/A	#N/A	#N/A
APELA	#N/A	#N/A	#N/A				#N/A	#N/A	#N/A
APLN	#N/A	#N/A	Apln				#N/A	#N/A	#N/A
APOA1	#N/A	#N/A	#N/A				#N/A	#N/A	#N/A
APOA2	#N/A	#N/A	#N/A				#N/A	#N/A	#N/A
APOA4	#N/A	#N/A	#N/A				#N/A	#N/A	#N/A
APOA5	#N/A	#N/A	#N/A				#N/A	#N/A	#N/A
APOB	#N/A	#N/A	#N/A				#N/A	#N/A	#N/A
APOC1	#N/A	#N/A	#N/A				#N/A	#N/A	#N/A
APOC2	#N/A	#N/A	#N/A				#N/A	#N/A	#N/A
APOC3	#N/A	#N/A	#N/A				#N/A	#N/A	#N/A
APOC4	#N/A	#N/A	#N/A				#N/A	#N/A	#N/A
APOD	#N/A	#N/A	#N/A				#N/A	Apod	Apod
APOE	#N/A	#N/A	#N/A				#N/A	#N/A	#N/A
APOF	#N/A	#N/A	#N/A				#N/A	#N/A	#N/A
APOH	#N/A	#N/A	#N/A				#N/A	#N/A	#N/A
APOL1	#N/A	#N/A	#N/A				#N/A	#N/A	#N/A
APOL4	#N/A	#N/A	#N/A				#N/A	#N/A	#N/A
APOM	#N/A	#N/A	#N/A				#N/A	#N/A	#N/A
APOO	#N/A	#N/A	#N/A				#N/A	#N/A	#N/A
ARSF	#N/A	#N/A	#N/A				#N/A	#N/A	#N/A
ARSI	#N/A	#N/A	#N/A				#N/A	#N/A	#N/A
ARSJ	#N/A	#N/A	#N/A				#N/A	#N/A	#N/A
ARSK	#N/A	#N/A	#N/A				#N/A	#N/A	#N/A
ART4	#N/A	#N/A	#N/A				#N/A	#N/A	#N/A
ART5	#N/A	#N/A	#N/A				#N/A	#N/A	#N/A
ARTN	#N/A	#N/A	#N/A				#N/A	#N/A	#N/A
ASIP	#N/A	#N/A	#N/A				#N/A	#N/A	#N/A
ASPN	#N/A	#N/A	#N/A				#N/A	#N/A	#N/A
ASTL	#N/A	#N/A	#N/A				#N/A	#N/A	#N/A
ATRN	#N/A	#N/A	#N/A				#N/A	#N/A	#N/A
AVP	#N/A	#N/A	#N/A				#N/A	#N/A	#N/A
AZGP1	#N/A	#N/A	#N/A				#N/A	Azgp1	Azgp1
AZU1	#N/A	#N/A	#N/A				#N/A	#N/A	#N/A
B3GAT1	#N/A	#N/A	#N/A				#N/A	#N/A	#N/A
BCAN	#N/A	#N/A	#N/A				#N/A	#N/A	#N/A
BCHE	#N/A	#N/A	#N/A				#N/A	#N/A	#N/A
BDNF	#N/A	#N/A	#N/A				#N/A	#N/A	#N/A
BGLAP	#N/A	#N/A	#N/A				#N/A	#N/A	#N/A
BGN	#N/A	#N/A	#N/A				#N/A	#N/A	#N/A
BMP1	#N/A	#N/A	#N/A				#N/A	#N/A	#N/A
BMP10	#N/A	#N/A	#N/A				#N/A	#N/A	#N/A
BMP15	#N/A	#N/A	#N/A				#N/A	#N/A	#N/A
BMP2	#N/A	#N/A	#N/A				#N/A	#N/A	#N/A
BMP3	#N/A	#N/A	#N/A				#N/A	#N/A	#N/A
BMP4	#N/A	#N/A	#N/A				#N/A	#N/A	#N/A
BMP5	#N/A	#N/A	#N/A				#N/A	#N/A	#N/A
BMP6	#N/A	#N/A	#N/A				#N/A	#N/A	#N/A
BMP7	#N/A	#N/A	#N/A				#N/A	Bmp7	Bmp7
BMP8A	#N/A	#N/A	#N/A				#N/A	#N/A	#N/A
BMP8B	#N/A	#N/A	#N/A				Bmp8b	Bmp8b	Bmp8b
BMPER	#N/A	#N/A	#N/A				#N/A	#N/A	#N/A
BPI	#N/A	#N/A	#N/A				#N/A	#N/A	#N/A
BPIFA1	#N/A	#N/A	#N/A				#N/A	#N/A	#N/A
BPIFA2	#N/A	#N/A	#N/A				#N/A	#N/A	#N/A
BPIFA3	#N/A	#N/A	#N/A				#N/A	#N/A	#N/A
BPIFB1	#N/A	#N/A	#N/A				#N/A	#N/A	#N/A
BPIFB4	#N/A	#N/A	#N/A				#N/A	#N/A	#N/A
BPIFC	#N/A	#N/A	#N/A				#N/A	#N/A	#N/A
BRINP2	#N/A	#N/A	#N/A				#N/A	#N/A	#N/A
BRINP3	#N/A	#N/A	#N/A				#N/A	#N/A	#N/A
BSPH1	#N/A	#N/A	#N/A				#N/A	#N/A	#N/A
BTBD17	Btbd17	Btbd17	Btbd17				#N/A	#N/A	#N/A
BTC	Btc	Btc	Btc				#N/A	#N/A	#N/A
BTD	#N/A	#N/A	#N/A				#N/A	#N/A	#N/A
BTN1A1	#N/A	#N/A	#N/A				#N/A	#N/A	#N/A
BX248415.1	#N/A	#N/A	#N/A				#N/A	#N/A	#N/A
C10orf95	#N/A	#N/A	#N/A				#N/A	#N/A	#N/A
C10orf99	#N/A	#N/A	#N/A				#N/A	#N/A	#N/A
C11orf45	#N/A	#N/A	#N/A				#N/A	#N/A	#N/A
C11orf94	#N/A	#N/A	#N/A				#N/A	#N/A	#N/A
C12orf49	#N/A	#N/A	#N/A				#N/A	#N/A	#N/A
C12orf73	#N/A	#N/A	#N/A				#N/A	#N/A	#N/A
C14orf93	#N/A	#N/A	#N/A				#N/A	#N/A	#N/A
C15orf61	#N/A	#N/A	#N/A				#N/A	#N/A	#N/A
C16orf89	#N/A	#N/A	#N/A				#N/A	#N/A	#N/A
C17orf67	#N/A	#N/A	#N/A				#N/A	#N/A	#N/A
C17orf99	#N/A	#N/A	#N/A				#N/A	#N/A	#N/A
C18orf54	#N/A	#N/A	#N/A				#N/A	#N/A	#N/A
C1orf54	#N/A	#N/A	#N/A				#N/A	#N/A	#N/A
C1orf56	#N/A	#N/A	#N/A				#N/A	#N/A	#N/A
C1QA	#N/A	C1qa	#N/A				#N/A	#N/A	#N/A
C1QB	#N/A	C1qb	#N/A				#N/A	#N/A	#N/A
C1QC	#N/A	C1qc	#N/A				#N/A	#N/A	#N/A
C1QL1	#N/A	#N/A	#N/A				#N/A	#N/A	#N/A
C1QL2	#N/A	#N/A	#N/A				#N/A	#N/A	#N/A
C1QL3	#N/A	#N/A	#N/A				#N/A	#N/A	#N/A
C1QL4	#N/A	#N/A	#N/A				#N/A	#N/A	#N/A
C1QTNF1	#N/A	#N/A	#N/A				#N/A	#N/A	#N/A
C1QTNF12	#N/A	#N/A	#N/A				#N/A	#N/A	#N/A
C1QTNF2	#N/A	#N/A	#N/A				#N/A	#N/A	#N/A
C1QTNF3	#N/A	#N/A	#N/A				#N/A	#N/A	#N/A
C1QTNF4	#N/A	#N/A	#N/A				#N/A	C1qtnf4	C1qtnf4
C1QTNF5	#N/A	#N/A	#N/A				#N/A	#N/A	#N/A
C1QTNF6	#N/A	#N/A	C1qtnf6				#N/A	#N/A	#N/A
C1QTNF7	#N/A	#N/A	#N/A				#N/A	#N/A	#N/A
C1QTNF8	#N/A	#N/A	#N/A				#N/A	#N/A	#N/A
C1QTNF9	#N/A	#N/A	#N/A				#N/A	C1qtnf9	#N/A
C1QTNF9B	#N/A	#N/A	#N/A				#N/A	#N/A	#N/A
C1R	#N/A	#N/A	#N/A				#N/A	#N/A	#N/A
C1RL	#N/A	#N/A	#N/A				#N/A	#N/A	#N/A
C1S	#N/A	#N/A	#N/A				#N/A	#N/A	#N/A
C2	#N/A	#N/A	#N/A				#N/A	#N/A	#N/A
C21orf62	#N/A	#N/A	#N/A				#N/A	#N/A	#N/A
C22orf15	#N/A	#N/A	#N/A				#N/A	#N/A	#N/A
C22orf46	#N/A	#N/A	#N/A				#N/A	#N/A	#N/A
C2orf40	#N/A	#N/A	#N/A				#N/A	#N/A	#N/A
C2orf66	#N/A	#N/A	#N/A				#N/A	#N/A	#N/A
C2orf69	#N/A	#N/A	#N/A				#N/A	#N/A	#N/A
C3	#N/A	C3	#N/A				#N/A	#N/A	#N/A
C3orf33	#N/A	#N/A	#N/A				#N/A	#N/A	#N/A
C3orf58	#N/A	#N/A	#N/A				#N/A	#N/A	#N/A
C4A	#N/A	C4a	#N/A				#N/A	#N/A	#N/A
C4B	#N/A	C4b	#N/A				#N/A	#N/A	#N/A
C4BPA	#N/A	#N/A	#N/A				#N/A	#N/A	#N/A
C4BPB	#N/A	#N/A	#N/A				#N/A	#N/A	#N/A
C4orf48	#N/A	#N/A	#N/A				#N/A	#N/A	#N/A
C5	#N/A	#N/A	#N/A				#N/A	#N/A	#N/A
C5orf38	#N/A	#N/A	#N/A				#N/A	#N/A	#N/A
C5orf46	#N/A	#N/A	#N/A				#N/A	#N/A	#N/A
C6	#N/A	#N/A	#N/A				#N/A	#N/A	#N/A
C6orf120	#N/A	#N/A	#N/A				#N/A	#N/A	#N/A
C6orf15	#N/A	#N/A	#N/A				#N/A	#N/A	#N/A
C6orf58	#N/A	#N/A	#N/A				#N/A	#N/A	#N/A
C7	#N/A	#N/A	#N/A				#N/A	#N/A	#N/A
C8A	#N/A	#N/A	#N/A				#N/A	#N/A	#N/A
C8B	#N/A	#N/A	#N/A				#N/A	#N/A	#N/A
C8G	#N/A	#N/A	#N/A				#N/A	#N/A	#N/A
C9	#N/A	#N/A	#N/A				#N/A	#N/A	#N/A
C9orf47	#N/A	#N/A	#N/A				#N/A	#N/A	#N/A
C9orf72	#N/A	#N/A	#N/A				#N/A	#N/A	#N/A
CA10	#N/A	#N/A	#N/A				#N/A	#N/A	#N/A
CA11	#N/A	#N/A	#N/A				#N/A	#N/A	#N/A
CA6	#N/A	#N/A	#N/A				#N/A	#N/A	#N/A
CALCA	#N/A	#N/A	#N/A				#N/A	#N/A	#N/A
CALCB	#N/A	Calcb	Calcb				#N/A	#N/A	#N/A
CAMP	#N/A	#N/A	#N/A				#N/A	#N/A	#N/A
CARTPT	#N/A	#N/A	#N/A				#N/A	#N/A	#N/A
CATSPERG	#N/A	#N/A	#N/A				#N/A	#N/A	#N/A
CBLN1	#N/A	#N/A	#N/A				#N/A	#N/A	#N/A
CBLN2	#N/A	#N/A	#N/A				#N/A	#N/A	#N/A
CBLN3	#N/A	#N/A	#N/A				#N/A	#N/A	#N/A
CBLN4	#N/A	#N/A	#N/A				#N/A	#N/A	#N/A
CCBE1	#N/A	#N/A	#N/A				#N/A	Ccbe1	Ccbe1
CCDC112	#N/A	#N/A	#N/A				#N/A	#N/A	#N/A
CCDC126	#N/A	#N/A	#N/A				#N/A	#N/A	#N/A
CCDC134	#N/A	#N/A	#N/A				#N/A	#N/A	#N/A
CCDC3	#N/A	#N/A	#N/A				#N/A	#N/A	#N/A
CCDC70	#N/A	#N/A	#N/A				#N/A	#N/A	#N/A
CCDC80	#N/A	#N/A	#N/A				#N/A	#N/A	#N/A
CCER2	#N/A	#N/A	#N/A				#N/A	#N/A	#N/A
CCK	#N/A	#N/A	#N/A				#N/A	#N/A	#N/A
CCL1	#N/A	#N/A	#N/A				#N/A	#N/A	#N/A
CCL11	#N/A	#N/A	#N/A				#N/A	#N/A	#N/A
CCL13	#N/A	#N/A	#N/A				#N/A	#N/A	#N/A
CCL14	#N/A	#N/A	#N/A				#N/A	#N/A	#N/A
CCL15	#N/A	#N/A	#N/A				#N/A	#N/A	#N/A
CCL16	#N/A	#N/A	#N/A				#N/A	#N/A	#N/A
CCL17	#N/A	#N/A	#N/A				#N/A	#N/A	#N/A
CCL18	#N/A	#N/A	#N/A				#N/A	#N/A	#N/A
CCL19	#N/A	#N/A	#N/A				#N/A	#N/A	#N/A
CCL2	#N/A	Ccl2	Ccl2				#N/A	#N/A	#N/A
CCL20	#N/A	#N/A	#N/A				#N/A	#N/A	#N/A
CCL21	#N/A	#N/A	#N/A				#N/A	#N/A	#N/A
CCL22	#N/A	#N/A	#N/A				#N/A	#N/A	#N/A
CCL23	#N/A	#N/A	#N/A				#N/A	#N/A	#N/A
CCL24	#N/A	#N/A	#N/A				Ccl24	Ccl24	#N/A
CCL25	#N/A	#N/A	#N/A				#N/A	#N/A	#N/A
CCL26	#N/A	#N/A	#N/A				#N/A	#N/A	#N/A
CCL27	#N/A	#N/A	#N/A				#N/A	#N/A	#N/A
CCL28	Ccl28	Ccl28	Ccl28				#N/A	#N/A	#N/A
CCL3	#N/A	Ccl3	Ccl3				#N/A	#N/A	#N/A
CCL3L1	#N/A	#N/A	#N/A				#N/A	#N/A	#N/A
CCL4	#N/A	Ccl4	Ccl4				#N/A	#N/A	#N/A
CCL4L2	#N/A	#N/A	#N/A				#N/A	#N/A	#N/A
CCL5	#N/A	#N/A	#N/A				#N/A	#N/A	#N/A
CCL7	#N/A	#N/A	Ccl7				#N/A	#N/A	#N/A
CCL8	Ccl8	Ccl8	Ccl8				#N/A	#N/A	#N/A
CD14	Cd14	Cd14	Cd14				#N/A	#N/A	#N/A
CD163	#N/A	#N/A	#N/A				#N/A	#N/A	Cd163
CD40	#N/A	#N/A	#N/A				#N/A	#N/A	#N/A
CD40LG	#N/A	#N/A	#N/A				#N/A	#N/A	#N/A
CD44	Cd44	Cd44	Cd44				#N/A	#N/A	#N/A
CD55	#N/A	#N/A	#N/A				#N/A	#N/A	#N/A
CD5L	#N/A	#N/A	#N/A				#N/A	#N/A	#N/A
CD6	#N/A	#N/A	#N/A				#N/A	#N/A	#N/A
CDCP2	#N/A	#N/A	#N/A				#N/A	#N/A	#N/A
CDNF	#N/A	#N/A	#N/A				#N/A	#N/A	#N/A
CDSN	#N/A	#N/A	#N/A				#N/A	#N/A	#N/A
CEACAM16	#N/A	#N/A	#N/A				#N/A	#N/A	#N/A
CEL	#N/A	#N/A	#N/A				#N/A	#N/A	#N/A
CELA1	#N/A	#N/A	#N/A				#N/A	#N/A	#N/A
CELA2A	#N/A	#N/A	#N/A				#N/A	#N/A	#N/A
CELA2B	#N/A	#N/A	#N/A				#N/A	#N/A	#N/A
CELA3A	#N/A	#N/A	#N/A				#N/A	#N/A	#N/A
CELA3B	#N/A	#N/A	#N/A				#N/A	#N/A	#N/A
CEMIP	#N/A	#N/A	#N/A				#N/A	#N/A	#N/A
CER1	#N/A	#N/A	#N/A				#N/A	#N/A	#N/A
CES4A	#N/A	#N/A	#N/A				#N/A	#N/A	#N/A
CES5A	#N/A	#N/A	#N/A				#N/A	#N/A	#N/A
CETP	#N/A	#N/A	#N/A				#N/A	#N/A	#N/A
CFB	#N/A	Cfb	Cfb				#N/A	#N/A	#N/A
CFC1	#N/A	#N/A	#N/A				#N/A	#N/A	#N/A
CFC1B	#N/A	#N/A	#N/A				#N/A	#N/A	#N/A
CFD	#N/A	#N/A	#N/A				#N/A	#N/A	#N/A
CFH	#N/A	#N/A	#N/A				#N/A	#N/A	#N/A
CFHR1	#N/A	#N/A	#N/A				#N/A	#N/A	#N/A
CFHR2	#N/A	#N/A	#N/A				#N/A	#N/A	#N/A
CFHR3	#N/A	#N/A	#N/A				#N/A	#N/A	#N/A
CFHR4	#N/A	#N/A	#N/A				#N/A	#N/A	#N/A
CFHR5	#N/A	#N/A	#N/A				#N/A	#N/A	#N/A
CFI	Cfi	Cfi	Cfi				#N/A	#N/A	#N/A
CFP	#N/A	#N/A	#N/A				#N/A	#N/A	#N/A
CGA	#N/A	#N/A	#N/A				#N/A	#N/A	#N/A
CGB1	#N/A	#N/A	#N/A				#N/A	#N/A	#N/A
CGB2	#N/A	#N/A	#N/A				#N/A	#N/A	#N/A
CGB3	#N/A	#N/A	#N/A				#N/A	#N/A	#N/A
CGB5	#N/A	#N/A	#N/A				#N/A	#N/A	#N/A
CGB7	#N/A	#N/A	#N/A				#N/A	#N/A	#N/A
CGB8	#N/A	#N/A	#N/A				#N/A	#N/A	#N/A
CGREF1	#N/A	#N/A	#N/A				Cgref1	Cgref1	Cgref1
CHAD	#N/A	#N/A	#N/A				#N/A	#N/A	#N/A
CHADL	#N/A	#N/A	#N/A				#N/A	#N/A	#N/A
CHI3L1	#N/A	#N/A	#N/A				#N/A	#N/A	#N/A
CHI3L2	#N/A	#N/A	#N/A				#N/A	#N/A	#N/A
CHIT1	Chit1	Chit1	Chit1				#N/A	#N/A	#N/A
CHRD	#N/A	#N/A	#N/A				#N/A	#N/A	#N/A
CHRDL1	#N/A	#N/A	#N/A				#N/A	#N/A	#N/A
CHRDL2	#N/A	Chrdl2	Chrdl2				#N/A	#N/A	#N/A
CHSY1	#N/A	#N/A	#N/A				#N/A	#N/A	#N/A
CILP	#N/A	#N/A	#N/A				#N/A	#N/A	#N/A
CILP2	#N/A	#N/A	#N/A				#N/A	Cilp2	#N/A
CKLF	#N/A	#N/A	#N/A				#N/A	#N/A	#N/A
CLCA1	#N/A	Clca1	#N/A				#N/A	#N/A	#N/A
CLCF1	#N/A	#N/A	#N/A				#N/A	#N/A	#N/A
CLEC11A	#N/A	#N/A	#N/A				#N/A	#N/A	#N/A
CLEC18A	#N/A	#N/A	#N/A				#N/A	#N/A	#N/A
CLEC18B	#N/A	#N/A	#N/A				#N/A	#N/A	#N/A
CLEC18C	#N/A	#N/A	#N/A				#N/A	#N/A	#N/A
CLEC19A	#N/A	#N/A	#N/A				#N/A	#N/A	#N/A
CLEC3A	#N/A	#N/A	#N/A				#N/A	#N/A	#N/A
CLEC3B	#N/A	#N/A	#N/A				#N/A	#N/A	Clec3b
CLPS	#N/A	#N/A	#N/A				#N/A	Clps	Clps
CLPSL1	#N/A	#N/A	#N/A				#N/A	#N/A	#N/A
CLPSL2	#N/A	#N/A	#N/A				#N/A	#N/A	#N/A
CLU	Clu	Clu	#N/A				#N/A	#N/A	#N/A
CLUL1	#N/A	#N/A	#N/A				#N/A	#N/A	#N/A
CMA1	#N/A	#N/A	#N/A				#N/A	#N/A	#N/A
CNBD1	#N/A	#N/A	#N/A				#N/A	#N/A	#N/A
CNDP1	#N/A	#N/A	#N/A				#N/A	#N/A	#N/A
CNMD	#N/A	#N/A	#N/A				#N/A	#N/A	#N/A
CNTN2	#N/A	#N/A	Cntn2				#N/A	#N/A	#N/A
COCH	#N/A	#N/A	#N/A				Coch	#N/A	#N/A
COL10A1	#N/A	#N/A	#N/A				#N/A	#N/A	#N/A
COL11A1	#N/A	#N/A	#N/A				#N/A	#N/A	#N/A
COL11A2	Col11a2	Col11a2	Col11a2				#N/A	#N/A	#N/A
COL12A1	#N/A	#N/A	#N/A				#N/A	#N/A	#N/A
COL14A1	#N/A	#N/A	#N/A				#N/A	#N/A	#N/A
COL15A1	#N/A	#N/A	#N/A				#N/A	#N/A	#N/A
COL16A1	#N/A	#N/A	#N/A				#N/A	#N/A	#N/A
COL17A1	#N/A	Col17a1	#N/A				#N/A	#N/A	#N/A
COL18A1	#N/A	#N/A	#N/A				#N/A	#N/A	#N/A
COL19A1	#N/A	#N/A	#N/A				#N/A	#N/A	#N/A
COL1A1	#N/A	#N/A	#N/A				#N/A	#N/A	#N/A
COL1A2	#N/A	#N/A	#N/A				#N/A	#N/A	#N/A
COL20A1	#N/A	#N/A	#N/A				#N/A	#N/A	#N/A
COL21A1	#N/A	#N/A	#N/A				#N/A	#N/A	#N/A
COL22A1	#N/A	#N/A	#N/A				#N/A	#N/A	#N/A
COL24A1	#N/A	#N/A	#N/A				#N/A	#N/A	#N/A
COL26A1	#N/A	#N/A	#N/A				#N/A	#N/A	#N/A
COL27A1	#N/A	#N/A	#N/A				#N/A	#N/A	#N/A
COL28A1	#N/A	#N/A	#N/A				#N/A	#N/A	#N/A
COL2A1	#N/A	#N/A	#N/A				#N/A	#N/A	#N/A
COL3A1	#N/A	#N/A	#N/A				#N/A	#N/A	#N/A
COL4A1	#N/A	#N/A	#N/A				#N/A	#N/A	#N/A
COL4A2	#N/A	#N/A	#N/A				#N/A	#N/A	#N/A
COL4A3	#N/A	#N/A	#N/A				#N/A	#N/A	#N/A
COL4A4	#N/A	#N/A	#N/A				#N/A	#N/A	#N/A
COL4A5	#N/A	#N/A	#N/A				#N/A	#N/A	#N/A
COL4A6	#N/A	#N/A	#N/A				#N/A	#N/A	#N/A
COL5A1	#N/A	#N/A	#N/A				#N/A	#N/A	#N/A
COL5A2	#N/A	#N/A	#N/A				#N/A	#N/A	#N/A
COL5A3	#N/A	#N/A	#N/A				#N/A	#N/A	#N/A
COL6A1	#N/A	#N/A	#N/A				#N/A	#N/A	#N/A
COL6A2	#N/A	#N/A	#N/A				#N/A	#N/A	#N/A
COL6A3	#N/A	#N/A	#N/A				#N/A	#N/A	#N/A
COL6A5	#N/A	#N/A	#N/A				#N/A	#N/A	#N/A
COL6A6	#N/A	#N/A	#N/A				Col6a6	Col6a6	Col6a6
COL7A1	#N/A	#N/A	#N/A				#N/A	#N/A	#N/A
COL8A1	#N/A	#N/A	#N/A				#N/A	#N/A	#N/A
COL8A2	#N/A	#N/A	#N/A				#N/A	#N/A	#N/A
COL9A1	#N/A	#N/A	#N/A				#N/A	#N/A	#N/A
COL9A2	#N/A	#N/A	#N/A				Col9a2	Col9a2	Col9a2
COL9A3	#N/A	#N/A	Col9a3				#N/A	#N/A	#N/A
COLEC10	#N/A	#N/A	#N/A				#N/A	#N/A	#N/A
COLEC11	#N/A	#N/A	#N/A				#N/A	#N/A	#N/A
COLQ	#N/A	#N/A	#N/A				#N/A	#N/A	#N/A
COMP	#N/A	#N/A	#N/A				#N/A	#N/A	#N/A
COPA	#N/A	#N/A	#N/A				#N/A	#N/A	#N/A
CORT	#N/A	#N/A	#N/A				#N/A	#N/A	#N/A
CP	#N/A	Cp	#N/A				#N/A	#N/A	#N/A
CPA1	#N/A	#N/A	#N/A				#N/A	#N/A	#N/A
CPA2	#N/A	Cpa2	#N/A				#N/A	#N/A	#N/A
CPA3	#N/A	#N/A	#N/A				#N/A	#N/A	#N/A
CPA4	#N/A	#N/A	#N/A				#N/A	#N/A	#N/A
CPA5	#N/A	#N/A	#N/A				#N/A	#N/A	#N/A
CPA6	#N/A	#N/A	#N/A				#N/A	#N/A	#N/A
CPAMD8	#N/A	#N/A	#N/A				#N/A	#N/A	#N/A
CPB1	#N/A	#N/A	#N/A				#N/A	#N/A	#N/A
CPB2	#N/A	#N/A	#N/A				#N/A	#N/A	#N/A
CPN1	#N/A	#N/A	#N/A				#N/A	#N/A	#N/A
CPN2	#N/A	#N/A	#N/A				#N/A	#N/A	#N/A
CPQ	#N/A	#N/A	#N/A				#N/A	#N/A	#N/A
CPXM1	#N/A	#N/A	#N/A				#N/A	#N/A	#N/A
CPXM2	#N/A	#N/A	#N/A				Cpxm2	Cpxm2	Cpxm2
CPZ	#N/A	#N/A	#N/A				#N/A	#N/A	#N/A
CREG1	#N/A	#N/A	#N/A				#N/A	#N/A	#N/A
CREG2	#N/A	#N/A	#N/A				Creg2	Creg2	Creg2
CRELD2	#N/A	#N/A	#N/A				#N/A	Creld2	#N/A
CRH	#N/A	#N/A	#N/A				#N/A	#N/A	#N/A
CRHBP	#N/A	#N/A	#N/A				#N/A	#N/A	#N/A
CRHR2	#N/A	#N/A	#N/A				#N/A	#N/A	#N/A
CRISP1	#N/A	#N/A	#N/A				#N/A	#N/A	#N/A
CRISP2	#N/A	#N/A	#N/A				#N/A	#N/A	#N/A
CRISP3	#N/A	#N/A	#N/A				#N/A	#N/A	#N/A
CRISPLD1	#N/A	#N/A	#N/A				#N/A	#N/A	#N/A
CRISPLD2	#N/A	#N/A	#N/A				#N/A	#N/A	#N/A
CRLF1	#N/A	#N/A	#N/A				#N/A	#N/A	#N/A
CRP	#N/A	#N/A	#N/A				#N/A	#N/A	#N/A
CRTAC1	#N/A	#N/A	#N/A				#N/A	Crtac1	Crtac1
CRTAP	#N/A	#N/A	#N/A				#N/A	#N/A	#N/A
CSF1	#N/A	Csf1	#N/A				#N/A	#N/A	#N/A
CSF2	#N/A	#N/A	#N/A				#N/A	#N/A	#N/A
CSF2RA	#N/A	#N/A	#N/A				#N/A	#N/A	#N/A
CSF3	#N/A	#N/A	#N/A				#N/A	#N/A	#N/A
CSH1	#N/A	#N/A	#N/A				#N/A	#N/A	#N/A
CSH2	#N/A	#N/A	#N/A				#N/A	#N/A	#N/A
CSHL1	#N/A	#N/A	#N/A				#N/A	#N/A	#N/A
CSN1S1	#N/A	#N/A	#N/A				#N/A	#N/A	#N/A
CSN2	#N/A	#N/A	#N/A				#N/A	#N/A	#N/A
CSN3	#N/A	#N/A	#N/A				#N/A	#N/A	#N/A
CST1	#N/A	#N/A	#N/A				#N/A	#N/A	#N/A
CST11	#N/A	#N/A	#N/A				#N/A	#N/A	#N/A
CST2	#N/A	#N/A	#N/A				#N/A	#N/A	#N/A
CST3	#N/A	#N/A	#N/A				#N/A	#N/A	#N/A
CST4	#N/A	#N/A	#N/A				#N/A	#N/A	#N/A
CST5	#N/A	#N/A	#N/A				#N/A	#N/A	#N/A
CST6	#N/A	#N/A	#N/A				#N/A	#N/A	#N/A
CST7	#N/A	#N/A	#N/A				#N/A	#N/A	#N/A
CST8	#N/A	#N/A	#N/A				#N/A	#N/A	#N/A
CST9	#N/A	#N/A	#N/A				#N/A	#N/A	#N/A
CST9L	#N/A	#N/A	#N/A				#N/A	#N/A	#N/A
CSTL1	#N/A	#N/A	#N/A				#N/A	#N/A	#N/A
CT55	#N/A	#N/A	#N/A				#N/A	#N/A	#N/A
CTF1	#N/A	#N/A	#N/A				#N/A	#N/A	#N/A
CTGF	#N/A	#N/A	#N/A				#N/A	#N/A	#N/A
CTHRC1	#N/A	#N/A	#N/A				#N/A	#N/A	#N/A
CTRB1	#N/A	#N/A	#N/A				#N/A	#N/A	#N/A
CTRB2	#N/A	#N/A	#N/A				#N/A	#N/A	#N/A
CTRC	#N/A	#N/A	#N/A				#N/A	#N/A	#N/A
CTRL	#N/A	#N/A	#N/A				#N/A	#N/A	#N/A
CTSB	#N/A	Ctsb	Ctsb				#N/A	#N/A	#N/A
CTSD	#N/A	#N/A	#N/A				#N/A	#N/A	#N/A
CTSW	#N/A	#N/A	#N/A				#N/A	#N/A	#N/A
CUTA	#N/A	#N/A	#N/A				#N/A	#N/A	#N/A
CX3CL1	#N/A	#N/A	#N/A				#N/A	#N/A	#N/A
CXCL1	Cxcl1	Cxcl1	Cxcl1				#N/A	#N/A	#N/A
CXCL10	#N/A	Cxcl10	Cxcl10				#N/A	#N/A	#N/A
CXCL11	#N/A	Cxcl11	Cxcl11				#N/A	#N/A	#N/A
CXCL12	#N/A	#N/A	#N/A				#N/A	#N/A	#N/A
CXCL13	#N/A	#N/A	#N/A				#N/A	#N/A	#N/A
CXCL14	#N/A	#N/A	#N/A				#N/A	#N/A	#N/A
CXCL16	Cxcl16	Cxcl16	Cxcl16				#N/A	#N/A	#N/A
CXCL17	#N/A	Cxcl17	Cxcl17				#N/A	#N/A	#N/A
CXCL2	Cxcl2	Cxcl2	Cxcl2				#N/A	#N/A	#N/A
CXCL3	Cxcl3	Cxcl3	Cxcl3				#N/A	#N/A	#N/A
CXCL5	Cxcl5	Cxcl5	Cxcl5				#N/A	#N/A	#N/A
CXCL6	#N/A	#N/A	#N/A				#N/A	#N/A	#N/A
CXCL8	#N/A	#N/A	#N/A				#N/A	#N/A	#N/A
CXCL9	#N/A	#N/A	#N/A				#N/A	#N/A	#N/A
CXorf36	#N/A	#N/A	#N/A				#N/A	#N/A	#N/A
CYB5D2	#N/A	#N/A	#N/A				#N/A	#N/A	#N/A
CYR61	#N/A	#N/A	#N/A				#N/A	#N/A	#N/A
CYTL1	#N/A	#N/A	#N/A				#N/A	Cytl1	Cytl1
DAND5	#N/A	#N/A	#N/A				#N/A	#N/A	#N/A
DCD	#N/A	#N/A	#N/A				#N/A	#N/A	#N/A
DCN	#N/A	#N/A	#N/A				#N/A	#N/A	#N/A
DEFA4	#N/A	#N/A	#N/A				#N/A	#N/A	#N/A
DEFA5	#N/A	#N/A	#N/A				#N/A	#N/A	#N/A
DEFA6	#N/A	#N/A	#N/A				#N/A	#N/A	#N/A
DEFB1	#N/A	#N/A	#N/A				Defb1	Defb1	Defb1
DEFB103A	#N/A	#N/A	#N/A				#N/A	#N/A	#N/A
DEFB103B	#N/A	#N/A	#N/A				#N/A	#N/A	#N/A
DEFB104A	#N/A	#N/A	#N/A				#N/A	#N/A	#N/A
DEFB104B	#N/A	#N/A	#N/A				#N/A	#N/A	#N/A
DEFB105A	#N/A	#N/A	#N/A				#N/A	#N/A	#N/A
DEFB105B	#N/A	#N/A	#N/A				#N/A	#N/A	#N/A
DEFB106A	#N/A	#N/A	#N/A				#N/A	#N/A	#N/A
DEFB106B	#N/A	#N/A	#N/A				#N/A	#N/A	#N/A
DEFB107A	#N/A	#N/A	#N/A				#N/A	#N/A	#N/A
DEFB107B	#N/A	#N/A	#N/A				#N/A	#N/A	#N/A
DEFB108B	#N/A	#N/A	#N/A				#N/A	#N/A	#N/A
DEFB110	#N/A	#N/A	#N/A				#N/A	#N/A	#N/A
DEFB112	#N/A	#N/A	#N/A				#N/A	#N/A	#N/A
DEFB113	#N/A	#N/A	#N/A				#N/A	#N/A	#N/A
DEFB114	#N/A	#N/A	#N/A				#N/A	#N/A	#N/A
DEFB115	#N/A	#N/A	#N/A				#N/A	#N/A	#N/A
DEFB116	#N/A	#N/A	#N/A				#N/A	#N/A	#N/A
DEFB118	#N/A	#N/A	#N/A				#N/A	#N/A	#N/A
DEFB119	#N/A	#N/A	#N/A				#N/A	#N/A	#N/A
DEFB121	#N/A	#N/A	#N/A				#N/A	#N/A	#N/A
DEFB123	#N/A	#N/A	#N/A				#N/A	#N/A	#N/A
DEFB124	#N/A	#N/A	#N/A				#N/A	#N/A	#N/A
DEFB125	#N/A	#N/A	#N/A				#N/A	#N/A	#N/A
DEFB126	#N/A	#N/A	#N/A				#N/A	#N/A	#N/A
DEFB127	#N/A	#N/A	#N/A				#N/A	#N/A	#N/A
DEFB128	#N/A	#N/A	#N/A				#N/A	#N/A	#N/A
DEFB129	#N/A	#N/A	#N/A				#N/A	#N/A	#N/A
DEFB130A	#N/A	#N/A	#N/A				#N/A	#N/A	#N/A
DEFB130B	#N/A	#N/A	#N/A				#N/A	#N/A	#N/A
DEFB131A	#N/A	#N/A	#N/A				#N/A	#N/A	#N/A
DEFB131B	#N/A	#N/A	#N/A				#N/A	#N/A	#N/A
DEFB132	#N/A	#N/A	#N/A				#N/A	#N/A	#N/A
DEFB133	#N/A	#N/A	#N/A				#N/A	#N/A	#N/A
DEFB134	#N/A	#N/A	#N/A				#N/A	#N/A	#N/A
DEFB135	#N/A	#N/A	#N/A				#N/A	#N/A	#N/A
DEFB136	#N/A	#N/A	#N/A				#N/A	#N/A	#N/A
DEFB4A	#N/A	#N/A	#N/A				#N/A	#N/A	#N/A
DEFB4B	#N/A	#N/A	#N/A				#N/A	#N/A	#N/A
DHH	#N/A	#N/A	#N/A				#N/A	#N/A	#N/A
DHRS13	#N/A	#N/A	#N/A				#N/A	#N/A	#N/A
DHRS4L2	#N/A	#N/A	#N/A				#N/A	#N/A	#N/A
DHRS7C	#N/A	#N/A	#N/A				#N/A	#N/A	#N/A
DHRSX	#N/A	#N/A	#N/A				#N/A	#N/A	#N/A
DKK1	#N/A	#N/A	#N/A				#N/A	#N/A	#N/A
DKK2	#N/A	#N/A	#N/A				#N/A	#N/A	#N/A
DKK3	#N/A	#N/A	#N/A				#N/A	#N/A	#N/A
DKK4	#N/A	#N/A	#N/A				#N/A	#N/A	#N/A
DKKL1	#N/A	Dkkl1	Dkkl1				#N/A	#N/A	#N/A
DMBT1	Dmbt1	Dmbt1	Dmbt1				#N/A	#N/A	#N/A
DMKN	#N/A	#N/A	#N/A				#N/A	#N/A	#N/A
DMP1	#N/A	#N/A	#N/A				#N/A	#N/A	#N/A
DNASE1	#N/A	#N/A	#N/A				#N/A	#N/A	#N/A
DNASE1L2	#N/A	#N/A	#N/A				#N/A	#N/A	#N/A
DNASE1L3	#N/A	#N/A	#N/A				#N/A	#N/A	#N/A
DPP4	#N/A	#N/A	#N/A				#N/A	#N/A	#N/A
DPT	#N/A	#N/A	#N/A				#N/A	#N/A	#N/A
DRAXIN	#N/A	#N/A	#N/A				#N/A	#N/A	#N/A
DSPP	#N/A	#N/A	#N/A				#N/A	#N/A	#N/A
EBI3	#N/A	#N/A	#N/A				#N/A	#N/A	#N/A
ECM1	#N/A	#N/A	#N/A				#N/A	#N/A	#N/A
ECM2	#N/A	#N/A	#N/A				#N/A	Ecm2	Ecm2
EDDM3A	#N/A	#N/A	#N/A				#N/A	#N/A	#N/A
EDDM3B	#N/A	#N/A	#N/A				#N/A	#N/A	#N/A
EDIL3	#N/A	#N/A	#N/A				#N/A	#N/A	#N/A
EDN1	#N/A	#N/A	#N/A				#N/A	#N/A	#N/A
EDN2	#N/A	#N/A	#N/A				#N/A	#N/A	Edn2
EDN3	#N/A	#N/A	#N/A				Edn3	#N/A	#N/A
EFEMP1	#N/A	#N/A	#N/A				#N/A	#N/A	#N/A
EFEMP2	#N/A	#N/A	#N/A				#N/A	#N/A	#N/A
EFNA1	#N/A	#N/A	#N/A				#N/A	#N/A	#N/A
EFNA4	#N/A	#N/A	#N/A				#N/A	#N/A	#N/A
EGFL6	#N/A	#N/A	#N/A				#N/A	#N/A	#N/A
EGFL7	#N/A	#N/A	#N/A				#N/A	#N/A	#N/A
EGFL8	#N/A	#N/A	#N/A				#N/A	#N/A	#N/A
EGFLAM	#N/A	#N/A	#N/A				#N/A	#N/A	#N/A
EGFR	#N/A	#N/A	#N/A				#N/A	#N/A	#N/A
ELANE	#N/A	#N/A	#N/A				#N/A	#N/A	#N/A
ELN	#N/A	#N/A	#N/A				#N/A	#N/A	#N/A
ELSPBP1	#N/A	#N/A	#N/A				#N/A	#N/A	#N/A
EMC10	#N/A	#N/A	#N/A				#N/A	#N/A	#N/A
EMID1	#N/A	#N/A	#N/A				#N/A	#N/A	#N/A
EMILIN1	#N/A	#N/A	#N/A				#N/A	#N/A	#N/A
EMILIN2	#N/A	#N/A	#N/A				#N/A	#N/A	#N/A
EMILIN3	#N/A	#N/A	#N/A				#N/A	#N/A	#N/A
ENAM	#N/A	#N/A	#N/A				#N/A	#N/A	#N/A
ENDOD1	#N/A	Endod1	#N/A				#N/A	#N/A	#N/A
ENDOU	#N/A	#N/A	#N/A				Endou	Endou	#N/A
ENHO	#N/A	#N/A	#N/A				#N/A	#N/A	#N/A
ENPP1	#N/A	#N/A	#N/A				#N/A	#N/A	#N/A
ENPP3	#N/A	#N/A	#N/A				#N/A	#N/A	#N/A
ENTPD5	#N/A	#N/A	#N/A				#N/A	#N/A	#N/A
ENTPD6	#N/A	#N/A	#N/A				#N/A	#N/A	#N/A
EPGN	#N/A	#N/A	#N/A				#N/A	#N/A	#N/A
EPO	#N/A	#N/A	#N/A				#N/A	#N/A	#N/A
EPPIN	#N/A	#N/A	#N/A				#N/A	#N/A	#N/A
EPPIN-WFDC6	#N/A	#N/A	#N/A				#N/A	#N/A	#N/A
EPYC	#N/A	#N/A	#N/A				#N/A	#N/A	#N/A
ERAP1	#N/A	#N/A	#N/A				#N/A	#N/A	#N/A
ERAP2	#N/A	#N/A	#N/A				#N/A	#N/A	#N/A
ERBB3	#N/A	#N/A	#N/A				#N/A	#N/A	#N/A
EREG	#N/A	#N/A	#N/A				#N/A	#N/A	#N/A
ERFE	#N/A	#N/A	#N/A				#N/A	#N/A	#N/A
ERVMER34-1	#N/A	#N/A	#N/A				#N/A	#N/A	#N/A
ESM1	#N/A	#N/A	#N/A				#N/A	#N/A	#N/A
EYS	#N/A	#N/A	#N/A				#N/A	#N/A	#N/A
F10	#N/A	#N/A	#N/A				#N/A	#N/A	#N/A
F11	#N/A	#N/A	#N/A				#N/A	#N/A	#N/A
F12	#N/A	#N/A	#N/A				#N/A	#N/A	#N/A
F13A1	#N/A	#N/A	#N/A				#N/A	#N/A	#N/A
F13B	#N/A	#N/A	#N/A				#N/A	#N/A	#N/A
F2	#N/A	#N/A	#N/A				#N/A	#N/A	#N/A
F3	F3	F3	F3				#N/A	#N/A	#N/A
F5	F5	F5	#N/A				#N/A	#N/A	#N/A
F7	#N/A	#N/A	#N/A				#N/A	#N/A	#N/A
F8	#N/A	#N/A	#N/A				#N/A	#N/A	#N/A
F9	#N/A	#N/A	#N/A				#N/A	#N/A	#N/A
FAM131A	#N/A	#N/A	#N/A				#N/A	#N/A	#N/A
FAM172A	#N/A	#N/A	#N/A				#N/A	#N/A	#N/A
FAM177A1	#N/A	#N/A	#N/A				#N/A	#N/A	#N/A
FAM180A	#N/A	#N/A	#N/A				#N/A	#N/A	#N/A
FAM198A	#N/A	#N/A	#N/A				#N/A	#N/A	#N/A
FAM19A1	#N/A	#N/A	#N/A				#N/A	#N/A	#N/A
FAM19A3	#N/A	Fam19a3	Fam19a3				#N/A	#N/A	#N/A
FAM19A4	#N/A	#N/A	#N/A				#N/A	#N/A	#N/A
FAM19A5	#N/A	#N/A	#N/A				#N/A	#N/A	#N/A
FAM20A	#N/A	#N/A	Fam20a				#N/A	#N/A	#N/A
FAM20C	#N/A	#N/A	#N/A				#N/A	#N/A	#N/A
FAM24A	#N/A	#N/A	#N/A				#N/A	#N/A	#N/A
FAM3A	#N/A	#N/A	#N/A				#N/A	#N/A	#N/A
FAM3B	#N/A	#N/A	#N/A				#N/A	#N/A	#N/A
FAM3C	#N/A	#N/A	#N/A				#N/A	#N/A	#N/A
FAM3D	#N/A	#N/A	#N/A				#N/A	#N/A	#N/A
FAM46B	#N/A	#N/A	#N/A				#N/A	#N/A	#N/A
FAP	#N/A	#N/A	#N/A				#N/A	#N/A	#N/A
FAS	#N/A	#N/A	#N/A				#N/A	#N/A	#N/A
FASLG	#N/A	#N/A	#N/A				#N/A	#N/A	#N/A
FBLN1	#N/A	#N/A	#N/A				#N/A	#N/A	#N/A
FBLN2	#N/A	#N/A	#N/A				#N/A	#N/A	#N/A
FBLN5	#N/A	#N/A	#N/A				#N/A	#N/A	#N/A
FBLN7	#N/A	#N/A	#N/A				#N/A	#N/A	#N/A
FBN1	#N/A	#N/A	#N/A				#N/A	#N/A	#N/A
FBN2	#N/A	#N/A	#N/A				#N/A	#N/A	#N/A
FBN3	#N/A	#N/A	#N/A				#N/A	#N/A	#N/A
FCER2	#N/A	#N/A	#N/A				#N/A	#N/A	#N/A
FCGR3A	#N/A	#N/A	#N/A				#N/A	#N/A	#N/A
FCGR3B	#N/A	#N/A	#N/A				#N/A	#N/A	#N/A
FCMR	#N/A	#N/A	#N/A				#N/A	#N/A	#N/A
FCN1	#N/A	#N/A	#N/A				#N/A	#N/A	#N/A
FCN2	#N/A	#N/A	#N/A				#N/A	#N/A	#N/A
FCN3	#N/A	#N/A	#N/A				#N/A	#N/A	#N/A
FCRL5	#N/A	#N/A	#N/A				#N/A	#N/A	#N/A
FDCSP	#N/A	#N/A	#N/A				#N/A	#N/A	#N/A
FETUB	#N/A	Fetub	Fetub				#N/A	#N/A	#N/A
FGA	#N/A	#N/A	#N/A				#N/A	#N/A	#N/A
FGB	#N/A	#N/A	#N/A				#N/A	#N/A	#N/A
FGF1	#N/A	#N/A	#N/A				#N/A	#N/A	Fgf1
FGF10	#N/A	#N/A	#N/A				#N/A	#N/A	#N/A
FGF16	#N/A	#N/A	#N/A				#N/A	#N/A	#N/A
FGF17	#N/A	#N/A	#N/A				#N/A	#N/A	#N/A
FGF18	#N/A	#N/A	#N/A				#N/A	#N/A	#N/A
FGF19	#N/A	#N/A	#N/A				#N/A	#N/A	#N/A
FGF2	#N/A	#N/A	#N/A				#N/A	#N/A	#N/A
FGF20	#N/A	#N/A	#N/A				#N/A	#N/A	#N/A
FGF21	#N/A	#N/A	#N/A				#N/A	#N/A	#N/A
FGF22	#N/A	#N/A	#N/A				#N/A	#N/A	#N/A
FGF23	#N/A	#N/A	#N/A				#N/A	#N/A	#N/A
FGF3	#N/A	#N/A	#N/A				#N/A	#N/A	#N/A
FGF4	#N/A	#N/A	#N/A				#N/A	#N/A	#N/A
FGF5	#N/A	#N/A	#N/A				#N/A	#N/A	#N/A
FGF6	#N/A	#N/A	#N/A				#N/A	#N/A	#N/A
FGF7	#N/A	#N/A	#N/A				#N/A	#N/A	#N/A
FGF8	#N/A	#N/A	#N/A				#N/A	#N/A	#N/A
FGF9	#N/A	#N/A	#N/A				#N/A	#N/A	#N/A
FGFBP1	#N/A	#N/A	#N/A				#N/A	#N/A	#N/A
FGFBP2	#N/A	#N/A	#N/A				#N/A	#N/A	#N/A
FGFBP3	#N/A	#N/A	#N/A				#N/A	#N/A	#N/A
FGFR2	#N/A	#N/A	#N/A				#N/A	#N/A	#N/A
FGG	#N/A	#N/A	#N/A				#N/A	#N/A	#N/A
FGL1	#N/A	#N/A	#N/A				#N/A	#N/A	#N/A
FGL2	#N/A	#N/A	#N/A				#N/A	#N/A	#N/A
FLT1	#N/A	#N/A	#N/A				#N/A	#N/A	#N/A
FLT4	#N/A	#N/A	Flt4				#N/A	#N/A	#N/A
FMOD	#N/A	#N/A	#N/A				Fmod	Fmod	Fmod
FN1	#N/A	#N/A	#N/A				#N/A	#N/A	#N/A
FNDC1	#N/A	#N/A	#N/A				#N/A	#N/A	#N/A
FNDC7	#N/A	#N/A	#N/A				#N/A	#N/A	#N/A
FOLR1	Folr1	Folr1	Folr1				#N/A	#N/A	#N/A
FOLR2	#N/A	#N/A	#N/A				#N/A	#N/A	#N/A
FOLR3	#N/A	#N/A	#N/A				#N/A	#N/A	#N/A
FREM1	#N/A	#N/A	#N/A				#N/A	#N/A	#N/A
FREM3	#N/A	#N/A	#N/A				#N/A	#N/A	#N/A
FRZB	#N/A	#N/A	#N/A				#N/A	#N/A	#N/A
FSHB	#N/A	#N/A	#N/A				#N/A	#N/A	#N/A
FST	#N/A	#N/A	#N/A				#N/A	#N/A	#N/A
FSTL1	#N/A	#N/A	#N/A				#N/A	#N/A	#N/A
FSTL3	#N/A	#N/A	#N/A				#N/A	#N/A	#N/A
FSTL4	#N/A	#N/A	#N/A				#N/A	#N/A	#N/A
FSTL5	#N/A	#N/A	#N/A				#N/A	#N/A	#N/A
FTCDNL1	#N/A	#N/A	#N/A				#N/A	#N/A	#N/A
FUCA2	#N/A	#N/A	#N/A				#N/A	#N/A	#N/A
GAL	#N/A	#N/A	#N/A				#N/A	#N/A	#N/A
GALP	#N/A	#N/A	#N/A				#N/A	#N/A	#N/A
GAS6	#N/A	#N/A	#N/A				#N/A	#N/A	#N/A
GAST	#N/A	#N/A	#N/A				#N/A	#N/A	#N/A
GATD1	#N/A	#N/A	#N/A				#N/A	#N/A	#N/A
GC	#N/A	#N/A	#N/A				#N/A	#N/A	#N/A
GCG	#N/A	#N/A	#N/A				#N/A	#N/A	#N/A
GDF1	#N/A	#N/A	#N/A				#N/A	#N/A	#N/A
GDF10	#N/A	#N/A	#N/A				#N/A	#N/A	#N/A
GDF11	#N/A	#N/A	#N/A				#N/A	#N/A	#N/A
GDF15	#N/A	Gdf15	Gdf15				#N/A	#N/A	#N/A
GDF2	#N/A	#N/A	#N/A				#N/A	#N/A	#N/A
GDF3	#N/A	Gdf3	Gdf3				#N/A	#N/A	#N/A
GDF5	#N/A	#N/A	#N/A				#N/A	#N/A	#N/A
GDF6	#N/A	#N/A	#N/A				#N/A	#N/A	#N/A
GDF7	#N/A	#N/A	#N/A				#N/A	#N/A	#N/A
GDF9	#N/A	#N/A	#N/A				#N/A	#N/A	#N/A
GDNF	#N/A	#N/A	#N/A				#N/A	#N/A	#N/A
GFOD1	#N/A	#N/A	#N/A				#N/A	Gfod1	#N/A
GFOD2	#N/A	#N/A	#N/A				#N/A	#N/A	#N/A
GH1	#N/A	#N/A	#N/A				#N/A	#N/A	#N/A
GH2	#N/A	#N/A	#N/A				#N/A	#N/A	#N/A
GHR	#N/A	#N/A	#N/A				#N/A	#N/A	#N/A
GHRH	#N/A	#N/A	#N/A				#N/A	#N/A	#N/A
GHRL	#N/A	#N/A	#N/A				#N/A	#N/A	#N/A
GIF	#N/A	#N/A	#N/A				#N/A	#N/A	#N/A
GIP	#N/A	#N/A	#N/A				#N/A	#N/A	#N/A
GKN1	#N/A	#N/A	#N/A				#N/A	#N/A	#N/A
GKN2	#N/A	#N/A	#N/A				#N/A	#N/A	#N/A
GLB1L	#N/A	#N/A	#N/A				#N/A	#N/A	#N/A
GLB1L2	#N/A	#N/A	#N/A				#N/A	#N/A	#N/A
GLDN	#N/A	#N/A	#N/A				#N/A	#N/A	#N/A
GLIPR1L1	#N/A	#N/A	#N/A				#N/A	#N/A	#N/A
GLT1D1	#N/A	#N/A	#N/A				#N/A	Glt1d1	Glt1d1
GLTPD2	#N/A	#N/A	#N/A				#N/A	#N/A	#N/A
GNLY	#N/A	#N/A	#N/A				#N/A	#N/A	#N/A
GNRH1	#N/A	#N/A	#N/A				#N/A	#N/A	#N/A
GNRH2	#N/A	#N/A	#N/A				#N/A	#N/A	#N/A
GPHA2	#N/A	#N/A	#N/A				#N/A	#N/A	#N/A
GPHB5	#N/A	#N/A	#N/A				#N/A	#N/A	#N/A
GPI	#N/A	#N/A	#N/A				#N/A	#N/A	#N/A
GPLD1	#N/A	#N/A	#N/A				#N/A	#N/A	#N/A
GPX3	#N/A	#N/A	#N/A				#N/A	#N/A	#N/A
GPX5	#N/A	#N/A	#N/A				#N/A	#N/A	#N/A
GPX6	#N/A	#N/A	#N/A				#N/A	#N/A	#N/A
GPX7	#N/A	#N/A	#N/A				#N/A	#N/A	#N/A
GREM1	#N/A	#N/A	#N/A				#N/A	#N/A	#N/A
GREM2	#N/A	#N/A	#N/A				Grem2	Grem2	#N/A
GRN	#N/A	Grn	Grn				#N/A	#N/A	#N/A
GRP	#N/A	#N/A	#N/A				#N/A	#N/A	#N/A
GSN	#N/A	#N/A	#N/A				#N/A	#N/A	#N/A
GUCA2A	#N/A	Guca2a	Guca2a				#N/A	#N/A	#N/A
GUCA2B	#N/A	#N/A	#N/A				#N/A	#N/A	#N/A
GZMA	#N/A	#N/A	#N/A				#N/A	#N/A	#N/A
GZMB	#N/A	#N/A	#N/A				#N/A	#N/A	#N/A
GZMH	#N/A	#N/A	#N/A				#N/A	#N/A	#N/A
GZMK	#N/A	#N/A	#N/A				#N/A	#N/A	#N/A
GZMM	#N/A	#N/A	#N/A				#N/A	#N/A	#N/A
HABP2	#N/A	#N/A	#N/A				#N/A	#N/A	#N/A
HAMP	#N/A	#N/A	#N/A				#N/A	#N/A	#N/A
HAPLN1	#N/A	#N/A	#N/A				#N/A	#N/A	#N/A
HAPLN2	#N/A	#N/A	#N/A				#N/A	#N/A	#N/A
HAPLN3	#N/A	#N/A	#N/A				#N/A	#N/A	#N/A
HAPLN4	#N/A	#N/A	#N/A				#N/A	#N/A	#N/A
HBEGF	#N/A	#N/A	#N/A				#N/A	#N/A	#N/A
HCRT	#N/A	#N/A	#N/A				#N/A	#N/A	#N/A
HGF	#N/A	Hgf	Hgf				#N/A	#N/A	#N/A
HGFAC	#N/A	Hgfac	#N/A				#N/A	#N/A	#N/A
HHIP	#N/A	#N/A	#N/A				Hhip	Hhip	Hhip
HHIPL1	#N/A	#N/A	#N/A				#N/A	#N/A	#N/A
HHIPL2	#N/A	#N/A	#N/A				#N/A	#N/A	#N/A
HHLA1	#N/A	#N/A	#N/A				#N/A	#N/A	#N/A
HLA-G	#N/A	#N/A	#N/A				#N/A	#N/A	#N/A
HMCN1	#N/A	#N/A	#N/A				#N/A	#N/A	#N/A
HMCN2	#N/A	#N/A	#N/A				#N/A	#N/A	#N/A
HMSD	#N/A	#N/A	#N/A				#N/A	#N/A	#N/A
HP	#N/A	#N/A	#N/A				#N/A	#N/A	#N/A
HPR	#N/A	#N/A	#N/A				#N/A	#N/A	#N/A
HPSE	#N/A	Hpse	Hpse				#N/A	#N/A	#N/A
HPSE2	#N/A	#N/A	#N/A				#N/A	#N/A	#N/A
HPX	#N/A	#N/A	#N/A				#N/A	#N/A	#N/A
HRG	#N/A	#N/A	#N/A				#N/A	#N/A	#N/A
HSD11B1L	#N/A	#N/A	#N/A				#N/A	#N/A	#N/A
HSPG2	#N/A	#N/A	#N/A				#N/A	#N/A	#N/A
HTN1	#N/A	#N/A	#N/A				#N/A	#N/A	#N/A
HTN3	#N/A	#N/A	#N/A				#N/A	#N/A	#N/A
HTRA1	#N/A	#N/A	#N/A				#N/A	#N/A	#N/A
HTRA3	#N/A	#N/A	#N/A				#N/A	#N/A	#N/A
HTRA4	#N/A	#N/A	#N/A				#N/A	#N/A	#N/A
HYAL1	#N/A	#N/A	#N/A				#N/A	#N/A	#N/A
HYAL3	#N/A	#N/A	#N/A				#N/A	#N/A	#N/A
IAPP	#N/A	#N/A	#N/A				Iapp	#N/A	#N/A
IBSP	#N/A	#N/A	#N/A				Ibsp	Ibsp	Ibsp
IFNA1	#N/A	#N/A	#N/A				#N/A	#N/A	#N/A
IFNA10	#N/A	#N/A	#N/A				#N/A	#N/A	#N/A
IFNA13	#N/A	#N/A	#N/A				#N/A	#N/A	#N/A
IFNA14	#N/A	#N/A	#N/A				#N/A	#N/A	#N/A
IFNA16	#N/A	#N/A	#N/A				#N/A	#N/A	#N/A
IFNA17	#N/A	#N/A	#N/A				#N/A	#N/A	#N/A
IFNA2	#N/A	#N/A	#N/A				#N/A	#N/A	#N/A
IFNA21	#N/A	#N/A	#N/A				#N/A	#N/A	#N/A
IFNA4	#N/A	#N/A	#N/A				#N/A	#N/A	#N/A
IFNA5	#N/A	#N/A	#N/A				#N/A	#N/A	#N/A
IFNA6	#N/A	#N/A	#N/A				#N/A	#N/A	#N/A
IFNA7	#N/A	#N/A	#N/A				#N/A	#N/A	#N/A
IFNA8	#N/A	#N/A	#N/A				#N/A	#N/A	#N/A
IFNAR2	#N/A	#N/A	#N/A				#N/A	#N/A	#N/A
IFNB1	#N/A	#N/A	#N/A				#N/A	#N/A	#N/A
IFNE	Ifne	Ifne	Ifne				#N/A	#N/A	#N/A
IFNG	#N/A	#N/A	#N/A				#N/A	#N/A	#N/A
IFNK	#N/A	#N/A	#N/A				#N/A	#N/A	#N/A
IFNL1	#N/A	#N/A	#N/A				#N/A	#N/A	#N/A
IFNL2	#N/A	#N/A	#N/A				#N/A	#N/A	#N/A
IFNL3	#N/A	#N/A	#N/A				#N/A	#N/A	#N/A
IFNW1	#N/A	#N/A	#N/A				#N/A	#N/A	#N/A
IGF1	#N/A	#N/A	#N/A				#N/A	#N/A	#N/A
IGF2	#N/A	#N/A	#N/A				#N/A	#N/A	#N/A
IGFALS	#N/A	#N/A	#N/A				#N/A	#N/A	Igfals
IGFBP1	#N/A	#N/A	#N/A				#N/A	#N/A	#N/A
IGFBP2	#N/A	#N/A	#N/A				#N/A	Igfbp2	Igfbp2
IGFBP3	#N/A	#N/A	Igfbp3				#N/A	#N/A	#N/A
IGFBP4	#N/A	#N/A	#N/A				#N/A	#N/A	#N/A
IGFBP5	#N/A	#N/A	#N/A				#N/A	#N/A	#N/A
IGFBP6	#N/A	#N/A	#N/A				#N/A	#N/A	#N/A
IGFBP7	#N/A	#N/A	Igfbp7				#N/A	#N/A	#N/A
IGFBPL1	#N/A	#N/A	#N/A				#N/A	#N/A	#N/A
IGFL1	#N/A	#N/A	#N/A				#N/A	#N/A	#N/A
IGFL2	#N/A	#N/A	#N/A				#N/A	#N/A	#N/A
IGFL3	#N/A	#N/A	#N/A				#N/A	#N/A	#N/A
IGFL4	#N/A	#N/A	#N/A				#N/A	#N/A	#N/A
IGIP	#N/A	#N/A	#N/A				#N/A	#N/A	#N/A
IGLL1	#N/A	#N/A	#N/A				#N/A	#N/A	#N/A
IGLL5	#N/A	#N/A	#N/A				#N/A	#N/A	#N/A
IGLON5	#N/A	#N/A	#N/A				#N/A	#N/A	#N/A
IGSF10	#N/A	#N/A	#N/A				#N/A	#N/A	#N/A
IHH	Ihh	Ihh	Ihh				#N/A	#N/A	#N/A
IL10	#N/A	#N/A	#N/A				#N/A	#N/A	#N/A
IL11	#N/A	#N/A	#N/A				#N/A	#N/A	#N/A
IL12A	#N/A	#N/A	#N/A				#N/A	#N/A	#N/A
IL12B	#N/A	#N/A	#N/A				#N/A	#N/A	#N/A
IL13	#N/A	#N/A	#N/A				#N/A	#N/A	#N/A
IL15	#N/A	#N/A	#N/A				#N/A	#N/A	#N/A
IL15RA	#N/A	#N/A	#N/A				#N/A	#N/A	#N/A
IL16	#N/A	#N/A	#N/A				#N/A	#N/A	#N/A
IL17A	#N/A	#N/A	#N/A				#N/A	#N/A	#N/A
IL17B	#N/A	#N/A	#N/A				#N/A	#N/A	#N/A
IL17C	#N/A	#N/A	#N/A				#N/A	#N/A	#N/A
IL17D	#N/A	#N/A	#N/A				#N/A	Il17d	Il17d
IL17F	#N/A	#N/A	#N/A				#N/A	#N/A	#N/A
IL17RA	#N/A	#N/A	#N/A				#N/A	#N/A	#N/A
IL18	#N/A	#N/A	#N/A				#N/A	#N/A	#N/A
IL18BP	Il18bp	Il18bp	Il18bp				#N/A	#N/A	#N/A
IL19	#N/A	#N/A	#N/A				#N/A	#N/A	#N/A
IL1A	#N/A	#N/A	Il1a				#N/A	#N/A	#N/A
IL1B	#N/A	Il1b	Il1b				#N/A	#N/A	#N/A
IL1F10	#N/A	#N/A	#N/A				#N/A	#N/A	#N/A
IL1R1	#N/A	#N/A	#N/A				#N/A	#N/A	#N/A
IL1R2	#N/A	#N/A	#N/A				#N/A	#N/A	#N/A
IL1RAP	#N/A	#N/A	#N/A				#N/A	#N/A	#N/A
IL1RL1	#N/A	#N/A	#N/A				#N/A	#N/A	#N/A
IL1RN	Il1rn	Il1rn	Il1rn				#N/A	#N/A	#N/A
IL2	#N/A	#N/A	#N/A				#N/A	#N/A	#N/A
IL20	#N/A	#N/A	#N/A				#N/A	#N/A	#N/A
IL21	#N/A	#N/A	#N/A				#N/A	#N/A	#N/A
IL22	#N/A	#N/A	#N/A				#N/A	#N/A	#N/A
IL22RA2	#N/A	#N/A	#N/A				#N/A	#N/A	#N/A
IL23A	#N/A	#N/A	#N/A				#N/A	#N/A	#N/A
IL24	#N/A	#N/A	#N/A				#N/A	#N/A	#N/A
IL25	#N/A	#N/A	#N/A				#N/A	#N/A	#N/A
IL26	#N/A	#N/A	#N/A				#N/A	#N/A	#N/A
IL27	#N/A	#N/A	#N/A				#N/A	#N/A	#N/A
IL3	#N/A	#N/A	#N/A				#N/A	#N/A	#N/A
IL31	#N/A	#N/A	#N/A				#N/A	#N/A	#N/A
IL32	#N/A	#N/A	#N/A				#N/A	#N/A	#N/A
IL33	#N/A	#N/A	#N/A				#N/A	#N/A	#N/A
IL34	#N/A	#N/A	#N/A				#N/A	#N/A	#N/A
IL36A	#N/A	#N/A	#N/A				#N/A	#N/A	#N/A
IL36B	#N/A	#N/A	#N/A				#N/A	#N/A	#N/A
IL36G	#N/A	#N/A	#N/A				#N/A	#N/A	#N/A
IL36RN	#N/A	#N/A	#N/A				#N/A	#N/A	#N/A
IL37	#N/A	#N/A	#N/A				#N/A	#N/A	#N/A
IL4	#N/A	#N/A	#N/A				#N/A	#N/A	#N/A
IL4I1	#N/A	#N/A	#N/A				#N/A	#N/A	#N/A
IL4R	#N/A	#N/A	#N/A				#N/A	#N/A	#N/A
IL5	#N/A	#N/A	#N/A				#N/A	#N/A	#N/A
IL6	#N/A	#N/A	#N/A				#N/A	#N/A	#N/A
IL6ST	#N/A	#N/A	#N/A				#N/A	#N/A	#N/A
IL7	#N/A	#N/A	#N/A				#N/A	#N/A	#N/A
IL9	#N/A	#N/A	#N/A				#N/A	#N/A	#N/A
IMPG1	#N/A	#N/A	#N/A				#N/A	#N/A	#N/A
INHA	#N/A	#N/A	#N/A				#N/A	#N/A	#N/A
INHBA	#N/A	#N/A	#N/A				#N/A	#N/A	#N/A
INHBB	#N/A	#N/A	Inhbb				#N/A	#N/A	#N/A
INHBC	#N/A	#N/A	#N/A				#N/A	#N/A	#N/A
INHBE	#N/A	#N/A	#N/A				#N/A	#N/A	#N/A
INS	#N/A	#N/A	#N/A				#N/A	#N/A	#N/A
INS-IGF2	#N/A	#N/A	#N/A				#N/A	#N/A	#N/A
INSL3	#N/A	#N/A	#N/A				#N/A	#N/A	#N/A
INSL4	#N/A	#N/A	#N/A				#N/A	#N/A	#N/A
INSL5	#N/A	#N/A	#N/A				#N/A	#N/A	#N/A
INSL6	#N/A	#N/A	#N/A				#N/A	#N/A	#N/A
ISG15	Isg15	Isg15	Isg15				#N/A	#N/A	#N/A
ISLR	#N/A	#N/A	#N/A				#N/A	#N/A	#N/A
ISM1	#N/A	#N/A	#N/A				Ism1	Ism1	Ism1
ISM2	#N/A	#N/A	#N/A				Ism2	Ism2	Ism2
ITGBL1	#N/A	#N/A	#N/A				#N/A	#N/A	#N/A
ITIH1	#N/A	#N/A	#N/A				#N/A	#N/A	#N/A
ITIH2	#N/A	#N/A	#N/A				#N/A	#N/A	#N/A
ITIH3	#N/A	#N/A	#N/A				#N/A	#N/A	#N/A
ITIH4	#N/A	#N/A	#N/A				#N/A	#N/A	#N/A
ITIH5	#N/A	#N/A	#N/A				Itih5	Itih5	Itih5
ITIH6	#N/A	#N/A	#N/A				#N/A	#N/A	#N/A
ITLN1	#N/A	#N/A	#N/A				Itln1	Itln1	Itln1
ITLN2	#N/A	#N/A	#N/A				#N/A	#N/A	#N/A
IZUMO4	#N/A	#N/A	#N/A				#N/A	#N/A	#N/A
JAM3	#N/A	#N/A	#N/A				#N/A	#N/A	#N/A
JCHAIN	#N/A	#N/A	#N/A				#N/A	#N/A	#N/A
KAZALD1	#N/A	#N/A	#N/A				#N/A	#N/A	#N/A
KCP	#N/A	#N/A	#N/A				#N/A	#N/A	#N/A
KERA	#N/A	#N/A	#N/A				#N/A	#N/A	#N/A
KIAA0100	#N/A	#N/A	#N/A				#N/A	#N/A	#N/A
KIAA0319	#N/A	#N/A	#N/A				#N/A	#N/A	#N/A
KIR3DX1	#N/A	#N/A	#N/A				#N/A	#N/A	#N/A
KISS1	#N/A	#N/A	#N/A				#N/A	#N/A	#N/A
KL	#N/A	#N/A	#N/A				#N/A	#N/A	#N/A
KLK1	#N/A	#N/A	#N/A				#N/A	#N/A	#N/A
KLK10	#N/A	#N/A	#N/A				#N/A	#N/A	#N/A
KLK11	#N/A	#N/A	#N/A				#N/A	#N/A	#N/A
KLK12	#N/A	#N/A	#N/A				#N/A	#N/A	#N/A
KLK13	#N/A	#N/A	#N/A				#N/A	#N/A	#N/A
KLK14	#N/A	#N/A	#N/A				#N/A	#N/A	#N/A
KLK15	#N/A	#N/A	#N/A				#N/A	#N/A	#N/A
KLK2	#N/A	#N/A	#N/A				#N/A	#N/A	#N/A
KLK3	#N/A	#N/A	#N/A				#N/A	#N/A	#N/A
KLK4	#N/A	#N/A	#N/A				#N/A	#N/A	#N/A
KLK5	#N/A	#N/A	#N/A				#N/A	#N/A	#N/A
KLK6	#N/A	#N/A	#N/A				#N/A	#N/A	#N/A
KLK7	#N/A	#N/A	#N/A				#N/A	#N/A	#N/A
KLK8	#N/A	#N/A	#N/A				#N/A	#N/A	#N/A
KLK9	#N/A	#N/A	#N/A				#N/A	#N/A	#N/A
KLKB1	#N/A	#N/A	#N/A				#N/A	#N/A	#N/A
KNG1	#N/A	#N/A	#N/A				#N/A	#N/A	#N/A
KRTDAP	#N/A	#N/A	#N/A				#N/A	#N/A	#N/A
LACRT	#N/A	#N/A	#N/A				#N/A	#N/A	#N/A
LAD1	Lad1	Lad1	Lad1				#N/A	#N/A	#N/A
LAG3	#N/A	Lag3	Lag3				#N/A	#N/A	#N/A
LAIR2	#N/A	#N/A	#N/A				#N/A	#N/A	#N/A
LALBA	#N/A	#N/A	#N/A				#N/A	#N/A	#N/A
LAMA1	#N/A	#N/A	#N/A				#N/A	#N/A	#N/A
LAMA2	#N/A	#N/A	#N/A				#N/A	#N/A	#N/A
LAMA3	#N/A	Lama3	#N/A				#N/A	#N/A	#N/A
LAMA4	#N/A	#N/A	#N/A				#N/A	#N/A	#N/A
LAMA5	#N/A	#N/A	#N/A				#N/A	#N/A	#N/A
LAMB1	#N/A	#N/A	#N/A				#N/A	#N/A	#N/A
LAMB2	#N/A	#N/A	#N/A				#N/A	#N/A	#N/A
LAMB3	#N/A	#N/A	#N/A				#N/A	#N/A	#N/A
LAMB4	#N/A	#N/A	#N/A				#N/A	#N/A	#N/A
LAMC1	#N/A	#N/A	#N/A				#N/A	#N/A	#N/A
LAMC2	#N/A	#N/A	#N/A				#N/A	#N/A	#N/A
LAMC3	#N/A	#N/A	#N/A				Lamc3	Lamc3	Lamc3
LBP	#N/A	#N/A	#N/A				#N/A	#N/A	#N/A
LCAT	#N/A	#N/A	#N/A				#N/A	#N/A	#N/A
LCN1	#N/A	#N/A	#N/A				#N/A	#N/A	#N/A
LCN10	#N/A	#N/A	#N/A				#N/A	#N/A	#N/A
LCN12	#N/A	#N/A	#N/A				#N/A	#N/A	#N/A
LCN15	#N/A	#N/A	#N/A				#N/A	#N/A	#N/A
LCN2	Lcn2	Lcn2	Lcn2				#N/A	#N/A	#N/A
LCN6	#N/A	#N/A	#N/A				#N/A	#N/A	#N/A
LCN8	#N/A	#N/A	#N/A				#N/A	#N/A	#N/A
LCN9	#N/A	#N/A	#N/A				#N/A	#N/A	#N/A
LDLRAD2	#N/A	#N/A	#N/A				#N/A	#N/A	#N/A
LEAP2	#N/A	#N/A	#N/A				#N/A	#N/A	#N/A
LECT2	#N/A	#N/A	#N/A				#N/A	#N/A	#N/A
LEFTY1	#N/A	Lefty1	Lefty1				#N/A	#N/A	#N/A
LEFTY2	#N/A	#N/A	#N/A				#N/A	#N/A	#N/A
LEP	#N/A	#N/A	#N/A				#N/A	#N/A	#N/A
LEPR	#N/A	#N/A	#N/A				#N/A	Lepr	#N/A
LGALS1	#N/A	#N/A	#N/A				#N/A	#N/A	#N/A
LGALS3	Lgals3	Lgals3	Lgals3				#N/A	#N/A	#N/A
LGALS3BP	Lgals3bp	Lgals3bp	Lgals3bp				#N/A	#N/A	#N/A
LGALS9	Lgals9	Lgals9	Lgals9				#N/A	#N/A	#N/A
LGI1	#N/A	#N/A	#N/A				Lgi1	Lgi1	Lgi1
LGI2	#N/A	#N/A	#N/A				#N/A	#N/A	#N/A
LGI3	#N/A	#N/A	#N/A				Lgi3	Lgi3	Lgi3
LGI4	#N/A	#N/A	#N/A				#N/A	#N/A	#N/A
LHB	#N/A	#N/A	#N/A				#N/A	#N/A	#N/A
LIF	Lif	Lif	Lif				#N/A	#N/A	#N/A
LILRA2	#N/A	#N/A	#N/A				#N/A	#N/A	#N/A
LILRA5	#N/A	#N/A	#N/A				#N/A	#N/A	#N/A
LIPC	Lipc	Lipc	Lipc				#N/A	#N/A	#N/A
LIPF	#N/A	#N/A	#N/A				#N/A	#N/A	#N/A
LIPG	#N/A	#N/A	#N/A				#N/A	#N/A	#N/A
LIPH	#N/A	#N/A	#N/A				#N/A	#N/A	#N/A
LIPI	#N/A	#N/A	#N/A				#N/A	#N/A	#N/A
LIPK	#N/A	#N/A	#N/A				#N/A	#N/A	#N/A
LIPM	#N/A	#N/A	#N/A				#N/A	#N/A	#N/A
LIPN	#N/A	#N/A	#N/A				#N/A	#N/A	#N/A
LOX	#N/A	#N/A	#N/A				#N/A	#N/A	#N/A
LOXL1	#N/A	#N/A	#N/A				#N/A	#N/A	#N/A
LOXL2	#N/A	#N/A	#N/A				#N/A	#N/A	#N/A
LOXL3	#N/A	#N/A	#N/A				#N/A	#N/A	#N/A
LOXL4	#N/A	#N/A	#N/A				#N/A	#N/A	#N/A
LPA	#N/A	#N/A	#N/A				#N/A	#N/A	#N/A
LPL	#N/A	#N/A	#N/A				#N/A	#N/A	#N/A
LPO	#N/A	#N/A	#N/A				#N/A	#N/A	#N/A
LRCH3	#N/A	#N/A	#N/A				#N/A	#N/A	#N/A
LRCOL1	#N/A	#N/A	#N/A				#N/A	#N/A	#N/A
LRG1	Lrg1	Lrg1	Lrg1				#N/A	#N/A	#N/A
LRP8	#N/A	Lrp8	Lrp8				#N/A	#N/A	#N/A
LRRC17	#N/A	#N/A	#N/A				#N/A	#N/A	#N/A
LTA	#N/A	#N/A	#N/A				#N/A	#N/A	#N/A
LTBP1	#N/A	#N/A	#N/A				#N/A	#N/A	#N/A
LTBP2	#N/A	Ltbp2	#N/A				#N/A	#N/A	#N/A
LTBP3	#N/A	#N/A	#N/A				#N/A	#N/A	#N/A
LTBP4	#N/A	#N/A	#N/A				#N/A	#N/A	#N/A
LTF	Ltf	Ltf	Ltf				#N/A	#N/A	#N/A
LUM	#N/A	#N/A	#N/A				#N/A	#N/A	#N/A
LUZP2	#N/A	#N/A	#N/A				#N/A	#N/A	#N/A
LY6G5B	#N/A	#N/A	#N/A				#N/A	#N/A	#N/A
LY6G5C	#N/A	#N/A	#N/A				#N/A	#N/A	#N/A
LY6K	Ly6k	#N/A	Ly6k				#N/A	#N/A	#N/A
LY86	#N/A	Ly86	#N/A				#N/A	#N/A	#N/A
LY96	#N/A	#N/A	#N/A				#N/A	#N/A	#N/A
LYG1	#N/A	#N/A	#N/A				#N/A	#N/A	#N/A
LYG2	#N/A	#N/A	#N/A				#N/A	#N/A	#N/A
LYPD6	#N/A	#N/A	#N/A				Lypd6	Lypd6	Lypd6
LYPD8	#N/A	Lypd8	Lypd8				#N/A	#N/A	#N/A
LYZ	#N/A	#N/A	#N/A				#N/A	#N/A	#N/A
LYZL1	#N/A	#N/A	#N/A				#N/A	#N/A	#N/A
LYZL2	#N/A	#N/A	#N/A				#N/A	#N/A	#N/A
LYZL4	#N/A	#N/A	#N/A				#N/A	#N/A	#N/A
LYZL6	#N/A	#N/A	#N/A				#N/A	#N/A	#N/A
MAMDC2	#N/A	#N/A	#N/A				#N/A	#N/A	#N/A
MAN2B2	#N/A	#N/A	#N/A				#N/A	#N/A	#N/A
MANF	#N/A	#N/A	#N/A				#N/A	#N/A	#N/A
MASP1	#N/A	#N/A	#N/A				#N/A	#N/A	#N/A
MASP2	#N/A	#N/A	#N/A				#N/A	#N/A	#N/A
MATN1	#N/A	#N/A	#N/A				#N/A	#N/A	#N/A
MATN2	#N/A	#N/A	#N/A				#N/A	#N/A	#N/A
MATN3	#N/A	#N/A	#N/A				#N/A	#N/A	#N/A
MATN4	#N/A	#N/A	#N/A				#N/A	#N/A	#N/A
MBL2	#N/A	#N/A	#N/A				#N/A	#N/A	#N/A
MDK	#N/A	Mdk	#N/A				#N/A	#N/A	#N/A
MEGF6	#N/A	#N/A	#N/A				#N/A	#N/A	#N/A
MEI1	#N/A	#N/A	#N/A				#N/A	Mei1	#N/A
MEP1B	#N/A	#N/A	#N/A				#N/A	#N/A	#N/A
MEPE	#N/A	#N/A	#N/A				Mepe	#N/A	#N/A
MET	#N/A	#N/A	#N/A				#N/A	#N/A	#N/A
METRN	#N/A	#N/A	#N/A				#N/A	#N/A	#N/A
METRNL	#N/A	#N/A	#N/A				#N/A	#N/A	#N/A
METTL24	#N/A	#N/A	#N/A				#N/A	#N/A	#N/A
METTL9	#N/A	#N/A	#N/A				#N/A	#N/A	#N/A
MFAP2	#N/A	#N/A	#N/A				#N/A	#N/A	#N/A
MFAP4	#N/A	#N/A	#N/A				#N/A	#N/A	Mfap4
MFAP5	#N/A	#N/A	#N/A				#N/A	#N/A	#N/A
MFGE8	#N/A	#N/A	#N/A				#N/A	#N/A	#N/A
MGAT4A	#N/A	Mgat4a	#N/A				#N/A	#N/A	#N/A
MGP	#N/A	#N/A	#N/A				#N/A	#N/A	#N/A
MIA	#N/A	#N/A	#N/A				#N/A	#N/A	#N/A
MIF	#N/A	#N/A	#N/A				#N/A	#N/A	#N/A
MLN	#N/A	#N/A	#N/A				#N/A	#N/A	#N/A
MMP1	#N/A	#N/A	#N/A				#N/A	#N/A	#N/A
MMP10	#N/A	#N/A	#N/A				#N/A	#N/A	#N/A
MMP11	#N/A	Mmp11	Mmp11				#N/A	#N/A	#N/A
MMP12	#N/A	#N/A	#N/A				#N/A	#N/A	#N/A
MMP13	#N/A	#N/A	#N/A				#N/A	#N/A	#N/A
MMP16	#N/A	#N/A	#N/A				#N/A	#N/A	Mmp16
MMP17	#N/A	#N/A	#N/A				#N/A	#N/A	#N/A
MMP19	#N/A	#N/A	#N/A				#N/A	#N/A	#N/A
MMP2	#N/A	#N/A	#N/A				#N/A	#N/A	#N/A
MMP20	#N/A	#N/A	#N/A				#N/A	#N/A	#N/A
MMP21	#N/A	#N/A	#N/A				#N/A	#N/A	#N/A
MMP24	#N/A	#N/A	#N/A				#N/A	#N/A	#N/A
MMP25	#N/A	#N/A	#N/A				#N/A	#N/A	#N/A
MMP26	#N/A	#N/A	#N/A				#N/A	#N/A	#N/A
MMP28	#N/A	#N/A	#N/A				#N/A	#N/A	#N/A
MMP3	Mmp3	Mmp3	Mmp3				#N/A	#N/A	#N/A
MMP7	Mmp7	Mmp7	Mmp7				#N/A	#N/A	#N/A
MMP8	#N/A	#N/A	Mmp8				#N/A	#N/A	#N/A
MMP9	#N/A	#N/A	#N/A				#N/A	#N/A	#N/A
MMRN1	#N/A	#N/A	#N/A				#N/A	#N/A	Mmrn1
MMRN2	#N/A	#N/A	#N/A				#N/A	#N/A	#N/A
MSMB	#N/A	#N/A	#N/A				Msmb	Msmb	Msmb
MSMP	#N/A	#N/A	#N/A				#N/A	#N/A	#N/A
MST1	#N/A	#N/A	#N/A				#N/A	#N/A	#N/A
MSTN	#N/A	#N/A	#N/A				#N/A	#N/A	#N/A
MTRNR2L1	#N/A	#N/A	#N/A				#N/A	#N/A	#N/A
MTRNR2L10	#N/A	#N/A	#N/A				#N/A	#N/A	#N/A
MTRNR2L11	#N/A	#N/A	#N/A				#N/A	#N/A	#N/A
MTRNR2L12	#N/A	#N/A	#N/A				#N/A	#N/A	#N/A
MTRNR2L13	#N/A	#N/A	#N/A				#N/A	#N/A	#N/A
MTRNR2L3	#N/A	#N/A	#N/A				#N/A	#N/A	#N/A
MTRNR2L4	#N/A	#N/A	#N/A				#N/A	#N/A	#N/A
MTRNR2L5	#N/A	#N/A	#N/A				#N/A	#N/A	#N/A
MTRNR2L6	#N/A	#N/A	#N/A				#N/A	#N/A	#N/A
MTRNR2L7	#N/A	#N/A	#N/A				#N/A	#N/A	#N/A
MTRNR2L8	#N/A	#N/A	#N/A				#N/A	#N/A	#N/A
MUC1	Muc1	Muc1	Muc1				#N/A	#N/A	#N/A
MUC13	Muc13	Muc13	Muc13				#N/A	#N/A	#N/A
MUC16	#N/A	#N/A	#N/A				#N/A	#N/A	#N/A
MUC20	Muc20	Muc20	#N/A				#N/A	#N/A	#N/A
MUC4	#N/A	Muc4	Muc4				#N/A	#N/A	#N/A
MUC5AC	#N/A	#N/A	#N/A				#N/A	#N/A	#N/A
MUC5B	#N/A	#N/A	#N/A				#N/A	#N/A	#N/A
MUC6	#N/A	#N/A	#N/A				#N/A	#N/A	#N/A
MUC7	#N/A	#N/A	#N/A				#N/A	#N/A	#N/A
MUCL1	#N/A	#N/A	#N/A				#N/A	#N/A	#N/A
MXRA5	#N/A	#N/A	#N/A				#N/A	#N/A	#N/A
MXRA7	#N/A	#N/A	#N/A				#N/A	#N/A	#N/A
MYDGF	#N/A	#N/A	#N/A				#N/A	#N/A	#N/A
MYOC	#N/A	#N/A	#N/A				Myoc	Myoc	Myoc
MZB1	#N/A	#N/A	#N/A				#N/A	#N/A	#N/A
NAMPT	#N/A	#N/A	#N/A				#N/A	#N/A	#N/A
NAPSA	#N/A	#N/A	#N/A				#N/A	#N/A	#N/A
NAXE	#N/A	#N/A	#N/A				#N/A	#N/A	#N/A
NBL1	#N/A	#N/A	#N/A				#N/A	#N/A	#N/A
NCAN	#N/A	#N/A	#N/A				#N/A	#N/A	#N/A
NDNF	#N/A	Ndnf	#N/A				#N/A	#N/A	#N/A
NDP	#N/A	#N/A	#N/A				#N/A	#N/A	#N/A
NECTIN1	#N/A	#N/A	#N/A				#N/A	#N/A	#N/A
NECTIN4	#N/A	#N/A	#N/A				#N/A	#N/A	#N/A
NELL1	#N/A	#N/A	#N/A				#N/A	#N/A	#N/A
NELL2	#N/A	#N/A	#N/A				#N/A	#N/A	#N/A
NENF	#N/A	#N/A	#N/A				#N/A	#N/A	#N/A
NGF	#N/A	#N/A	#N/A				#N/A	#N/A	#N/A
NHLRC3	#N/A	#N/A	#N/A				#N/A	#N/A	#N/A
NID1	#N/A	#N/A	#N/A				#N/A	#N/A	#N/A
NID2	#N/A	#N/A	#N/A				#N/A	#N/A	#N/A
NMB	#N/A	#N/A	#N/A				#N/A	#N/A	#N/A
NMS	#N/A	#N/A	#N/A				#N/A	#N/A	#N/A
NMU	#N/A	#N/A	#N/A				#N/A	#N/A	#N/A
NODAL	#N/A	#N/A	#N/A				#N/A	#N/A	#N/A
NOG	#N/A	#N/A	#N/A				#N/A	#N/A	#N/A
NOTCH2NL	#N/A	#N/A	#N/A				#N/A	#N/A	#N/A
NOTUM	#N/A	#N/A	#N/A				#N/A	#N/A	#N/A
NOV	#N/A	#N/A	#N/A				#N/A	#N/A	#N/A
NPB	#N/A	#N/A	#N/A				#N/A	#N/A	#N/A
NPC2	#N/A	#N/A	#N/A				#N/A	#N/A	#N/A
NPFF	#N/A	#N/A	#N/A				#N/A	#N/A	#N/A
NPNT	Npnt	Npnt	Npnt				#N/A	#N/A	#N/A
NPPA	#N/A	#N/A	#N/A				#N/A	#N/A	#N/A
NPPB	#N/A	#N/A	#N/A				#N/A	#N/A	#N/A
NPPC	#N/A	#N/A	#N/A				#N/A	#N/A	#N/A
NPS	#N/A	#N/A	#N/A				#N/A	#N/A	#N/A
NPTX1	#N/A	#N/A	#N/A				#N/A	#N/A	#N/A
NPTX2	#N/A	#N/A	#N/A				Nptx2	Nptx2	Nptx2
NPVF	#N/A	#N/A	#N/A				#N/A	#N/A	#N/A
NPW	#N/A	#N/A	#N/A				#N/A	#N/A	#N/A
NPY	#N/A	#N/A	#N/A				#N/A	#N/A	#N/A
NRG1	#N/A	#N/A	#N/A				#N/A	#N/A	#N/A
NRG2	#N/A	#N/A	#N/A				Nrg2	Nrg2	Nrg2
NRG3	#N/A	#N/A	#N/A				#N/A	#N/A	#N/A
NRG4	#N/A	#N/A	#N/A				#N/A	#N/A	#N/A
NRN1L	#N/A	#N/A	#N/A				#N/A	#N/A	#N/A
NRP1	#N/A	#N/A	#N/A				#N/A	#N/A	#N/A
NRP2	#N/A	#N/A	#N/A				Nrp2	#N/A	#N/A
NRTN	#N/A	#N/A	#N/A				#N/A	#N/A	#N/A
NT5DC3	#N/A	#N/A	#N/A				#N/A	#N/A	#N/A
NTF3	#N/A	#N/A	#N/A				#N/A	#N/A	#N/A
NTF4	#N/A	#N/A	#N/A				#N/A	#N/A	#N/A
NTN1	#N/A	#N/A	#N/A				Ntn1	Ntn1	#N/A
NTN3	#N/A	#N/A	#N/A				#N/A	#N/A	#N/A
NTN4	#N/A	#N/A	#N/A				#N/A	#N/A	#N/A
NTN5	#N/A	#N/A	#N/A				#N/A	#N/A	#N/A
NTS	#N/A	#N/A	#N/A				#N/A	#N/A	#N/A
NUCB1	#N/A	#N/A	#N/A				#N/A	#N/A	#N/A
NUCB2	#N/A	#N/A	#N/A				#N/A	Nucb2	Nucb2
NXPE3	#N/A	#N/A	#N/A				#N/A	#N/A	#N/A
NXPE4	#N/A	#N/A	#N/A				#N/A	#N/A	#N/A
NXPH1	#N/A	#N/A	#N/A				#N/A	#N/A	#N/A
NXPH2	#N/A	#N/A	#N/A				#N/A	#N/A	#N/A
NXPH3	#N/A	#N/A	#N/A				Nxph3	#N/A	#N/A
NXPH4	#N/A	#N/A	#N/A				#N/A	#N/A	#N/A
OAF	#N/A	Oaf	Oaf				#N/A	#N/A	#N/A
OBP2A	#N/A	#N/A	#N/A				#N/A	#N/A	#N/A
OBP2B	#N/A	#N/A	#N/A				#N/A	#N/A	#N/A
OC90	#N/A	#N/A	#N/A				#N/A	#N/A	#N/A
ODAPH	#N/A	#N/A	#N/A				#N/A	#N/A	#N/A
OGN	#N/A	#N/A	#N/A				Ogn	Ogn	Ogn
OIT3	#N/A	#N/A	#N/A				#N/A	#N/A	#N/A
OLFM1	#N/A	#N/A	#N/A				#N/A	#N/A	#N/A
OLFM2	#N/A	#N/A	#N/A				#N/A	#N/A	#N/A
OLFM3	#N/A	#N/A	#N/A				#N/A	#N/A	#N/A
OLFM4	Olfm4	Olfm4	Olfm4				#N/A	#N/A	#N/A
OLFML1	#N/A	#N/A	#N/A				#N/A	#N/A	Olfml1
OLFML2A	#N/A	#N/A	#N/A				#N/A	#N/A	#N/A
OLFML2B	#N/A	#N/A	#N/A				#N/A	#N/A	#N/A
OLFML3	#N/A	#N/A	#N/A				#N/A	#N/A	#N/A
OMD	#N/A	#N/A	#N/A				#N/A	#N/A	#N/A
OOSP2	#N/A	#N/A	#N/A				#N/A	#N/A	#N/A
OPRPN	#N/A	#N/A	#N/A				#N/A	#N/A	#N/A
OPTC	#N/A	#N/A	#N/A				Optc	Optc	Optc
ORM1	#N/A	#N/A	#N/A				#N/A	#N/A	#N/A
ORM2	#N/A	#N/A	#N/A				#N/A	#N/A	#N/A
OSM	#N/A	Osm	Osm				#N/A	#N/A	#N/A
OSTN	#N/A	#N/A	#N/A				#N/A	#N/A	#N/A
OTOA	#N/A	#N/A	#N/A				#N/A	#N/A	#N/A
OTOG	#N/A	#N/A	#N/A				#N/A	#N/A	#N/A
OTOL1	#N/A	#N/A	#N/A				#N/A	#N/A	#N/A
OTOR	#N/A	#N/A	#N/A				#N/A	#N/A	#N/A
OTOS	#N/A	#N/A	#N/A				#N/A	#N/A	#N/A
OVCH1	#N/A	#N/A	#N/A				#N/A	#N/A	#N/A
OVCH2	#N/A	#N/A	#N/A				#N/A	#N/A	#N/A
OXT	#N/A	#N/A	#N/A				#N/A	#N/A	#N/A
P4HB	#N/A	#N/A	#N/A				#N/A	#N/A	#N/A
PAEP	#N/A	#N/A	#N/A				#N/A	#N/A	#N/A
PAM	#N/A	#N/A	#N/A				#N/A	#N/A	#N/A
PAMR1	#N/A	Pamr1	#N/A				#N/A	#N/A	#N/A
PAPLN	#N/A	#N/A	#N/A				#N/A	Papln	Papln
PAPPA	#N/A	#N/A	#N/A				Pappa	#N/A	Pappa
PAPPA2	#N/A	#N/A	#N/A				Pappa2	Pappa2	Pappa2
PATE1	#N/A	#N/A	#N/A				#N/A	#N/A	#N/A
PATE2	#N/A	#N/A	#N/A				#N/A	#N/A	#N/A
PATE3	#N/A	#N/A	#N/A				#N/A	#N/A	#N/A
PATE4	#N/A	#N/A	#N/A				#N/A	#N/A	#N/A
PCDH12	#N/A	#N/A	#N/A				#N/A	#N/A	#N/A
PCDHA1	#N/A	#N/A	#N/A				#N/A	#N/A	#N/A
PCDHA10	#N/A	#N/A	#N/A				#N/A	#N/A	#N/A
PCOLCE	#N/A	#N/A	#N/A				#N/A	#N/A	#N/A
PCOLCE2	#N/A	#N/A	#N/A				Pcolce2	#N/A	Pcolce2
PCSK1	#N/A	Pcsk1	Pcsk1				#N/A	#N/A	#N/A
PCSK1N	#N/A	#N/A	#N/A				#N/A	#N/A	#N/A
PCSK2	#N/A	#N/A	#N/A				#N/A	#N/A	#N/A
PCSK5	#N/A	#N/A	#N/A				#N/A	#N/A	#N/A
PCSK6	#N/A	#N/A	#N/A				#N/A	#N/A	#N/A
PCSK9	#N/A	Pcsk9	Pcsk9				#N/A	#N/A	#N/A
PCYOX1L	#N/A	Pcyox1l	Pcyox1l				#N/A	#N/A	#N/A
PDCD1LG2	#N/A	#N/A	Pdcd1lg2				#N/A	#N/A	#N/A
PDGFA	#N/A	#N/A	#N/A				#N/A	#N/A	#N/A
PDGFB	#N/A	Pdgfb	Pdgfb				#N/A	#N/A	#N/A
PDGFC	#N/A	#N/A	#N/A				#N/A	#N/A	#N/A
PDGFD	#N/A	#N/A	#N/A				#N/A	#N/A	#N/A
PDGFRL	#N/A	#N/A	#N/A				#N/A	#N/A	#N/A
PDYN	#N/A	#N/A	#N/A				#N/A	#N/A	#N/A
PEBP4	#N/A	#N/A	#N/A				#N/A	#N/A	#N/A
PENK	#N/A	#N/A	#N/A				#N/A	#N/A	#N/A
PF4	#N/A	#N/A	#N/A				#N/A	#N/A	#N/A
PF4V1	#N/A	#N/A	#N/A				#N/A	#N/A	#N/A
PGA3	#N/A	#N/A	#N/A				#N/A	#N/A	#N/A
PGA4	#N/A	#N/A	#N/A				#N/A	#N/A	#N/A
PGA5	#N/A	#N/A	#N/A				#N/A	#N/A	#N/A
PGC	#N/A	#N/A	#N/A				#N/A	#N/A	#N/A
PGF	#N/A	#N/A	#N/A				#N/A	#N/A	#N/A
PGLYRP1	Pglyrp1	Pglyrp1	Pglyrp1				#N/A	#N/A	#N/A
PGLYRP2	#N/A	#N/A	#N/A				#N/A	#N/A	#N/A
PGLYRP3	#N/A	#N/A	#N/A				#N/A	#N/A	#N/A
PGLYRP4	#N/A	#N/A	Pglyrp4				#N/A	#N/A	#N/A
PI15	#N/A	#N/A	#N/A				#N/A	#N/A	#N/A
PI16	#N/A	#N/A	#N/A				#N/A	#N/A	#N/A
PI3	#N/A	#N/A	#N/A				#N/A	#N/A	#N/A
PIBF1	#N/A	#N/A	#N/A				#N/A	#N/A	#N/A
PILRA	#N/A	#N/A	#N/A				#N/A	#N/A	#N/A
PINLYP	#N/A	#N/A	#N/A				#N/A	#N/A	#N/A
PIP	#N/A	#N/A	#N/A				#N/A	Pip	Pip
PKDCC	#N/A	#N/A	Pkdcc				#N/A	#N/A	#N/A
PLA1A	#N/A	#N/A	#N/A				#N/A	#N/A	#N/A
PLA2G10	#N/A	#N/A	#N/A				#N/A	#N/A	#N/A
PLA2G12A	#N/A	#N/A	#N/A				#N/A	#N/A	#N/A
PLA2G12B	#N/A	#N/A	#N/A				#N/A	#N/A	#N/A
PLA2G1B	#N/A	#N/A	#N/A				#N/A	#N/A	#N/A
PLA2G2A	#N/A	#N/A	#N/A				#N/A	#N/A	#N/A
PLA2G2C	#N/A	#N/A	#N/A				#N/A	#N/A	#N/A
PLA2G2D	#N/A	#N/A	#N/A				Pla2g2d	#N/A	Pla2g2d
PLA2G2E	#N/A	#N/A	#N/A				#N/A	#N/A	#N/A
PLA2G3	#N/A	#N/A	#N/A				#N/A	#N/A	#N/A
PLA2G5	#N/A	#N/A	#N/A				#N/A	#N/A	#N/A
PLA2G7	#N/A	Pla2g7	#N/A				#N/A	#N/A	#N/A
PLA2R1	#N/A	#N/A	#N/A				#N/A	#N/A	#N/A
PLAC1	#N/A	#N/A	#N/A				#N/A	#N/A	#N/A
PLAC9	#N/A	#N/A	#N/A				#N/A	#N/A	#N/A
PLAT	#N/A	Plat	Plat				#N/A	#N/A	#N/A
PLAU	#N/A	#N/A	#N/A				#N/A	#N/A	#N/A
PLG	#N/A	#N/A	#N/A				#N/A	#N/A	#N/A
PLGLB1	#N/A	#N/A	#N/A				#N/A	#N/A	#N/A
PLGLB2	#N/A	#N/A	#N/A				#N/A	#N/A	#N/A
PLOD3	#N/A	#N/A	#N/A				#N/A	#N/A	#N/A
PLTP	#N/A	#N/A	#N/A				#N/A	#N/A	#N/A
PM20D1	#N/A	#N/A	#N/A				#N/A	#N/A	#N/A
PMCH	#N/A	#N/A	#N/A				#N/A	#N/A	#N/A
PNLIP	#N/A	#N/A	#N/A				#N/A	#N/A	#N/A
PNLIPRP1	#N/A	#N/A	#N/A				Pnliprp1	Pnliprp1	Pnliprp1
PNLIPRP3	#N/A	#N/A	#N/A				#N/A	#N/A	#N/A
PNOC	#N/A	#N/A	#N/A				#N/A	#N/A	#N/A
PODN	#N/A	#N/A	#N/A				#N/A	#N/A	#N/A
PODNL1	#N/A	#N/A	#N/A				#N/A	#N/A	#N/A
POMC	#N/A	#N/A	#N/A				#N/A	#N/A	#N/A
PON1	#N/A	#N/A	#N/A				#N/A	#N/A	#N/A
PON2	#N/A	#N/A	#N/A				#N/A	#N/A	#N/A
PON3	#N/A	#N/A	#N/A				#N/A	#N/A	#N/A
POSTN	#N/A	#N/A	#N/A				#N/A	#N/A	#N/A
PPBP	#N/A	#N/A	#N/A				#N/A	#N/A	#N/A
PPIA	#N/A	#N/A	#N/A				#N/A	#N/A	#N/A
PPIB	#N/A	#N/A	#N/A				#N/A	#N/A	#N/A
PPY	#N/A	#N/A	#N/A				#N/A	#N/A	#N/A
PRADC1	#N/A	#N/A	#N/A				#N/A	#N/A	#N/A
PRAP1	#N/A	#N/A	#N/A				#N/A	#N/A	#N/A
PRB1	#N/A	#N/A	#N/A				#N/A	#N/A	#N/A
PRB2	#N/A	#N/A	#N/A				#N/A	#N/A	#N/A
PRB3	#N/A	#N/A	#N/A				#N/A	#N/A	#N/A
PRB4	#N/A	#N/A	#N/A				#N/A	#N/A	#N/A
PRELP	#N/A	#N/A	#N/A				Prelp	Prelp	Prelp
PRG3	#N/A	#N/A	#N/A				#N/A	#N/A	#N/A
PRG4	#N/A	#N/A	#N/A				#N/A	#N/A	#N/A
PRH2	#N/A	#N/A	#N/A				#N/A	#N/A	#N/A
PRL	#N/A	#N/A	#N/A				#N/A	#N/A	#N/A
PRLH	#N/A	#N/A	#N/A				#N/A	#N/A	#N/A
PROC	#N/A	#N/A	#N/A				Proc	Proc	Proc
PROK1	#N/A	#N/A	#N/A				#N/A	#N/A	#N/A
PROK2	#N/A	#N/A	#N/A				#N/A	#N/A	#N/A
PROS1	#N/A	#N/A	#N/A				#N/A	#N/A	#N/A
PROZ	#N/A	#N/A	#N/A				#N/A	#N/A	#N/A
PRR27	#N/A	#N/A	#N/A				#N/A	#N/A	#N/A
PRR4	#N/A	#N/A	#N/A				#N/A	#N/A	#N/A
PRSS1	#N/A	#N/A	#N/A				#N/A	#N/A	#N/A
PRSS12	#N/A	Prss12	#N/A				#N/A	#N/A	#N/A
PRSS16	#N/A	#N/A	#N/A				#N/A	#N/A	#N/A
PRSS2	#N/A	#N/A	#N/A				#N/A	#N/A	#N/A
PRSS22	#N/A	#N/A	#N/A				#N/A	#N/A	#N/A
PRSS23	#N/A	#N/A	#N/A				#N/A	#N/A	#N/A
PRSS27	Prss27	Prss27	Prss27				#N/A	#N/A	#N/A
PRSS3	#N/A	#N/A	#N/A				#N/A	#N/A	#N/A
PRSS33	#N/A	#N/A	#N/A				#N/A	#N/A	#N/A
PRSS35	#N/A	#N/A	#N/A				#N/A	#N/A	#N/A
PRSS36	#N/A	#N/A	#N/A				#N/A	#N/A	#N/A
PRSS37	#N/A	#N/A	#N/A				#N/A	#N/A	#N/A
PRSS38	#N/A	#N/A	#N/A				#N/A	#N/A	#N/A
PRSS42	#N/A	#N/A	#N/A				#N/A	#N/A	#N/A
PRSS48	#N/A	#N/A	#N/A				#N/A	#N/A	#N/A
PRSS51	#N/A	#N/A	#N/A				#N/A	#N/A	#N/A
PRSS53	#N/A	#N/A	#N/A				#N/A	Prss53	Prss53
PRSS54	#N/A	#N/A	#N/A				#N/A	#N/A	#N/A
PRSS57	#N/A	#N/A	#N/A				#N/A	#N/A	#N/A
PRSS58	#N/A	#N/A	#N/A				#N/A	#N/A	#N/A
PRSS8	#N/A	#N/A	#N/A				#N/A	#N/A	#N/A
PRTN3	#N/A	#N/A	#N/A				#N/A	#N/A	#N/A
PSAPL1	Psapl1	Psapl1	Psapl1				#N/A	#N/A	#N/A
PSG1	#N/A	#N/A	#N/A				#N/A	#N/A	#N/A
PSG11	#N/A	#N/A	#N/A				#N/A	#N/A	#N/A
PSG2	#N/A	#N/A	#N/A				#N/A	#N/A	#N/A
PSG3	#N/A	#N/A	#N/A				#N/A	#N/A	#N/A
PSG4	#N/A	#N/A	#N/A				#N/A	#N/A	#N/A
PSG5	#N/A	#N/A	#N/A				#N/A	#N/A	#N/A
PSG6	#N/A	#N/A	#N/A				#N/A	#N/A	#N/A
PSG7	#N/A	#N/A	#N/A				#N/A	#N/A	#N/A
PSG8	#N/A	#N/A	#N/A				#N/A	#N/A	#N/A
PSG9	#N/A	#N/A	#N/A				#N/A	#N/A	#N/A
PSORS1C2	#N/A	#N/A	#N/A				#N/A	#N/A	#N/A
PSPN	#N/A	#N/A	#N/A				#N/A	#N/A	#N/A
PTEN	#N/A	#N/A	#N/A				#N/A	#N/A	#N/A
PTGDS	#N/A	#N/A	#N/A				#N/A	#N/A	#N/A
PTH	#N/A	#N/A	#N/A				#N/A	#N/A	#N/A
PTH2	#N/A	#N/A	#N/A				#N/A	#N/A	#N/A
PTHLH	#N/A	#N/A	#N/A				#N/A	#N/A	#N/A
PTK7	#N/A	Ptk7	Ptk7				#N/A	#N/A	#N/A
PTN	#N/A	#N/A	#N/A				#N/A	#N/A	#N/A
PTPRS	#N/A	#N/A	#N/A				#N/A	#N/A	#N/A
PTPRZ1	#N/A	#N/A	Ptprz1				#N/A	#N/A	#N/A
PTX3	#N/A	#N/A	Ptx3				#N/A	#N/A	#N/A
PTX4	#N/A	#N/A	#N/A				#N/A	#N/A	#N/A
PVR	#N/A	#N/A	Pvr				#N/A	#N/A	#N/A
PXDN	#N/A	#N/A	#N/A				#N/A	#N/A	#N/A
PYY	#N/A	#N/A	#N/A				#N/A	#N/A	#N/A
PZP	#N/A	#N/A	#N/A				#N/A	#N/A	#N/A
QPCT	#N/A	#N/A	#N/A				#N/A	#N/A	#N/A
QRFP	#N/A	#N/A	#N/A				#N/A	#N/A	#N/A
QSOX1	Qsox1	Qsox1	Qsox1				#N/A	#N/A	#N/A
R3HDML	#N/A	R3hdml	#N/A				#N/A	#N/A	#N/A
RAET1G	#N/A	#N/A	#N/A				#N/A	#N/A	#N/A
RARRES2	#N/A	#N/A	#N/A				#N/A	#N/A	#N/A
RBP3	#N/A	#N/A	#N/A				#N/A	#N/A	#N/A
RBP4	#N/A	#N/A	#N/A				#N/A	#N/A	#N/A
REG1A	#N/A	#N/A	#N/A				#N/A	#N/A	#N/A
REG1B	#N/A	#N/A	#N/A				#N/A	#N/A	#N/A
REG3A	#N/A	#N/A	#N/A				#N/A	#N/A	#N/A
REG3G	Reg3g	Reg3g	Reg3g				#N/A	#N/A	#N/A
REG4	#N/A	#N/A	#N/A				#N/A	#N/A	#N/A
RELN	#N/A	#N/A	#N/A				Reln	Reln	Reln
REN	#N/A	#N/A	#N/A				#N/A	#N/A	#N/A
RETN	#N/A	#N/A	#N/A				#N/A	Retn	#N/A
RETNLB	#N/A	#N/A	#N/A				#N/A	#N/A	#N/A
RGMA	#N/A	#N/A	#N/A				#N/A	#N/A	#N/A
RLN1	#N/A	#N/A	#N/A				#N/A	#N/A	#N/A
RLN2	#N/A	#N/A	#N/A				#N/A	#N/A	#N/A
RLN3	#N/A	#N/A	#N/A				#N/A	#N/A	#N/A
RNASE1	#N/A	#N/A	#N/A				Rnase1	Rnase1	Rnase1
RNASE10	#N/A	#N/A	#N/A				#N/A	#N/A	#N/A
RNASE11	#N/A	#N/A	#N/A				#N/A	#N/A	#N/A
RNASE12	#N/A	#N/A	#N/A				#N/A	#N/A	#N/A
RNASE13	#N/A	#N/A	#N/A				#N/A	#N/A	#N/A
RNASE2	#N/A	#N/A	#N/A				#N/A	#N/A	#N/A
RNASE3	#N/A	#N/A	#N/A				#N/A	#N/A	#N/A
RNASE4	#N/A	#N/A	#N/A				#N/A	#N/A	#N/A
RNASE6	#N/A	#N/A	#N/A				#N/A	#N/A	#N/A
RNASE7	#N/A	#N/A	#N/A				#N/A	#N/A	#N/A
RNASE8	#N/A	#N/A	#N/A				#N/A	#N/A	#N/A
RNASE9	#N/A	#N/A	#N/A				#N/A	#N/A	#N/A
RNASET2	#N/A	#N/A	#N/A				#N/A	#N/A	#N/A
RNLS	#N/A	#N/A	#N/A				#N/A	#N/A	#N/A
RNPEP	#N/A	#N/A	#N/A				#N/A	#N/A	#N/A
RPTN	#N/A	#N/A	#N/A				#N/A	#N/A	#N/A
RS1	#N/A	#N/A	#N/A				#N/A	#N/A	#N/A
RSPO1	#N/A	#N/A	#N/A				#N/A	#N/A	#N/A
RSPO2	#N/A	#N/A	#N/A				Rspo2	Rspo2	#N/A
RSPO3	#N/A	#N/A	#N/A				#N/A	#N/A	#N/A
RSPO4	#N/A	#N/A	#N/A				#N/A	#N/A	#N/A
RSPRY1	#N/A	#N/A	#N/A				#N/A	#N/A	#N/A
RTBDN	#N/A	#N/A	#N/A				#N/A	#N/A	#N/A
S100A12	#N/A	#N/A	#N/A				#N/A	#N/A	#N/A
S100A13	#N/A	#N/A	#N/A				#N/A	#N/A	#N/A
S100A7	#N/A	#N/A	#N/A				#N/A	#N/A	#N/A
S100A8	#N/A	#N/A	#N/A				#N/A	#N/A	#N/A
S100A9	#N/A	S100a9	S100a9				#N/A	#N/A	#N/A
SAA1	#N/A	#N/A	#N/A				#N/A	#N/A	#N/A
SAA2	#N/A	#N/A	#N/A				#N/A	#N/A	#N/A
SAA4	#N/A	#N/A	#N/A				#N/A	#N/A	#N/A
SBSN	#N/A	#N/A	Sbsn				#N/A	#N/A	#N/A
SBSPON	#N/A	#N/A	#N/A				#N/A	#N/A	Sbspon
SCG2	#N/A	#N/A	#N/A				#N/A	#N/A	#N/A
SCG3	#N/A	#N/A	#N/A				#N/A	#N/A	#N/A
SCG5	#N/A	#N/A	#N/A				#N/A	#N/A	#N/A
SCGB1A1	#N/A	#N/A	#N/A				#N/A	#N/A	#N/A
SCGB1C1	#N/A	#N/A	#N/A				#N/A	#N/A	#N/A
SCGB1C2	#N/A	#N/A	#N/A				#N/A	#N/A	#N/A
SCGB1D1	#N/A	#N/A	#N/A				#N/A	#N/A	#N/A
SCGB1D2	#N/A	#N/A	#N/A				#N/A	#N/A	#N/A
SCGB1D4	#N/A	#N/A	#N/A				#N/A	#N/A	#N/A
SCGB2A1	#N/A	#N/A	#N/A				#N/A	#N/A	#N/A
SCGB2A2	#N/A	#N/A	#N/A				#N/A	#N/A	#N/A
SCGB2B2	#N/A	#N/A	#N/A				#N/A	#N/A	#N/A
SCGB3A1	#N/A	Scgb3a1	Scgb3a1				#N/A	#N/A	#N/A
SCGB3A2	#N/A	#N/A	#N/A				#N/A	#N/A	#N/A
SCPEP1	#N/A	Scpep1	Scpep1				#N/A	#N/A	#N/A
SCRG1	#N/A	#N/A	#N/A				#N/A	#N/A	#N/A
SCT	#N/A	#N/A	#N/A				#N/A	#N/A	#N/A
SCUBE1	#N/A	#N/A	#N/A				#N/A	#N/A	#N/A
SCUBE2	#N/A	#N/A	#N/A				Scube2	Scube2	Scube2
SCUBE3	#N/A	#N/A	#N/A				#N/A	#N/A	#N/A
SDC1	#N/A	Sdc1	Sdc1				#N/A	#N/A	#N/A
SDC4	#N/A	#N/A	#N/A				#N/A	#N/A	#N/A
SECTM1	#N/A	#N/A	#N/A				#N/A	#N/A	#N/A
SELENOP	#N/A	#N/A	#N/A				#N/A	#N/A	#N/A
SEMA3A	#N/A	#N/A	#N/A				#N/A	#N/A	#N/A
SEMA3B	#N/A	#N/A	#N/A				#N/A	#N/A	#N/A
SEMA3C	#N/A	#N/A	#N/A				#N/A	#N/A	#N/A
SEMA3D	#N/A	#N/A	#N/A				#N/A	#N/A	Sema3d
SEMA3E	#N/A	#N/A	#N/A				#N/A	#N/A	#N/A
SEMA3F	#N/A	#N/A	#N/A				#N/A	#N/A	#N/A
SEMA3G	#N/A	#N/A	#N/A				#N/A	#N/A	#N/A
SEMG1	#N/A	#N/A	#N/A				#N/A	#N/A	#N/A
SEMG2	#N/A	#N/A	#N/A				#N/A	#N/A	#N/A
SERPINA1	#N/A	#N/A	#N/A				#N/A	#N/A	#N/A
SERPINA10	#N/A	#N/A	#N/A				#N/A	#N/A	#N/A
SERPINA11	#N/A	#N/A	#N/A				#N/A	#N/A	#N/A
SERPINA12	#N/A	#N/A	#N/A				#N/A	#N/A	#N/A
SERPINA3	#N/A	#N/A	#N/A				#N/A	#N/A	#N/A
SERPINA4	#N/A	#N/A	#N/A				#N/A	#N/A	#N/A
SERPINA5	#N/A	#N/A	#N/A				#N/A	#N/A	#N/A
SERPINA6	#N/A	#N/A	#N/A				#N/A	#N/A	#N/A
SERPINA7	#N/A	#N/A	#N/A				#N/A	#N/A	#N/A
SERPINA9	#N/A	Serpina9	#N/A				#N/A	#N/A	#N/A
SERPINC1	#N/A	#N/A	#N/A				#N/A	#N/A	#N/A
SERPIND1	#N/A	#N/A	#N/A				#N/A	#N/A	#N/A
SERPINE1	#N/A	#N/A	#N/A				#N/A	#N/A	#N/A
SERPINE2	#N/A	#N/A	#N/A				#N/A	#N/A	#N/A
SERPINE3	#N/A	#N/A	#N/A				#N/A	#N/A	#N/A
SERPINF1	#N/A	#N/A	#N/A				#N/A	#N/A	#N/A
SERPINF2	#N/A	#N/A	#N/A				#N/A	#N/A	#N/A
SERPING1	#N/A	#N/A	#N/A				#N/A	#N/A	#N/A
SERPINI1	Serpini1	Serpini1	Serpini1				#N/A	#N/A	#N/A
SERPINI2	#N/A	#N/A	#N/A				#N/A	#N/A	#N/A
SFN	#N/A	Sfn	Sfn				#N/A	#N/A	#N/A
SFRP1	#N/A	#N/A	#N/A				#N/A	#N/A	#N/A
SFRP2	#N/A	#N/A	#N/A				#N/A	#N/A	#N/A
SFRP4	#N/A	#N/A	#N/A				#N/A	#N/A	#N/A
SFRP5	#N/A	#N/A	#N/A				#N/A	#N/A	#N/A
SFTA2	#N/A	#N/A	#N/A				#N/A	#N/A	#N/A
SFTA3	#N/A	#N/A	#N/A				#N/A	#N/A	#N/A
SFTPA1	#N/A	#N/A	#N/A				#N/A	#N/A	#N/A
SFTPA2	#N/A	#N/A	#N/A				#N/A	#N/A	#N/A
SFTPB	#N/A	#N/A	#N/A				#N/A	#N/A	#N/A
SFTPC	#N/A	#N/A	#N/A				#N/A	#N/A	#N/A
SFTPD	Sftpd	Sftpd	Sftpd				#N/A	#N/A	#N/A
SHBG	#N/A	#N/A	#N/A				#N/A	#N/A	#N/A
SHE	#N/A	#N/A	#N/A				#N/A	#N/A	#N/A
SIRPD	#N/A	#N/A	#N/A				#N/A	#N/A	#N/A
SLAMF1	#N/A	#N/A	#N/A				#N/A	#N/A	#N/A
SLIT1	#N/A	#N/A	#N/A				#N/A	#N/A	#N/A
SLIT2	#N/A	#N/A	#N/A				#N/A	#N/A	#N/A
SLIT3	#N/A	#N/A	#N/A				#N/A	#N/A	#N/A
SLITRK1	#N/A	#N/A	#N/A				#N/A	#N/A	#N/A
SLPI	#N/A	#N/A	#N/A				#N/A	#N/A	#N/A
SLURP1	#N/A	#N/A	#N/A				#N/A	#N/A	#N/A
SLURP2	#N/A	#N/A	#N/A				#N/A	#N/A	#N/A
SMIM31	#N/A	#N/A	#N/A				#N/A	#N/A	#N/A
SMOC1	#N/A	#N/A	#N/A				#N/A	#N/A	#N/A
SMOC2	#N/A	#N/A	#N/A				#N/A	#N/A	#N/A
SMPD1	#N/A	#N/A	#N/A				#N/A	#N/A	#N/A
SMPDL3A	#N/A	#N/A	#N/A				#N/A	#N/A	#N/A
SMPDL3B	#N/A	Smpdl3b	Smpdl3b				#N/A	#N/A	#N/A
SMR3A	#N/A	#N/A	#N/A				#N/A	#N/A	#N/A
SMR3B	#N/A	#N/A	#N/A				#N/A	#N/A	#N/A
SNED1	#N/A	#N/A	#N/A				#N/A	#N/A	#N/A
SOD3	#N/A	#N/A	#N/A				#N/A	#N/A	#N/A
SOGA1	#N/A	#N/A	#N/A				#N/A	#N/A	#N/A
SORL1	#N/A	#N/A	#N/A				#N/A	#N/A	#N/A
SOST	#N/A	#N/A	#N/A				#N/A	#N/A	#N/A
SOSTDC1	#N/A	#N/A	#N/A				#N/A	#N/A	#N/A
SPACA3	#N/A	#N/A	#N/A				#N/A	#N/A	#N/A
SPACA5	#N/A	#N/A	#N/A				#N/A	#N/A	#N/A
SPACA5B	#N/A	#N/A	#N/A				#N/A	#N/A	#N/A
SPACA7	#N/A	#N/A	#N/A				#N/A	#N/A	#N/A
SPAG11A	#N/A	#N/A	#N/A				#N/A	#N/A	#N/A
SPAG11B	#N/A	#N/A	#N/A				#N/A	#N/A	#N/A
SPARC	#N/A	#N/A	#N/A				#N/A	#N/A	#N/A
SPARCL1	#N/A	#N/A	#N/A				#N/A	#N/A	#N/A
SPATA20	#N/A	#N/A	#N/A				#N/A	#N/A	#N/A
SPINK1	#N/A	#N/A	#N/A				#N/A	#N/A	#N/A
SPINK13	#N/A	#N/A	#N/A				#N/A	#N/A	#N/A
SPINK14	#N/A	#N/A	#N/A				#N/A	#N/A	#N/A
SPINK2	#N/A	#N/A	#N/A				#N/A	#N/A	#N/A
SPINK4	#N/A	#N/A	#N/A				#N/A	#N/A	#N/A
SPINK5	#N/A	#N/A	#N/A				#N/A	#N/A	#N/A
SPINK6	#N/A	#N/A	#N/A				#N/A	#N/A	#N/A
SPINK7	#N/A	#N/A	#N/A				#N/A	#N/A	#N/A
SPINK8	#N/A	#N/A	#N/A				#N/A	#N/A	#N/A
SPINK9	#N/A	#N/A	#N/A				#N/A	#N/A	#N/A
SPINT1	#N/A	#N/A	#N/A				#N/A	#N/A	#N/A
SPINT3	#N/A	#N/A	#N/A				#N/A	#N/A	#N/A
SPINT4	#N/A	#N/A	#N/A				#N/A	#N/A	#N/A
SPOCK1	#N/A	#N/A	#N/A				#N/A	#N/A	#N/A
SPOCK2	#N/A	#N/A	#N/A				Spock2	Spock2	#N/A
SPOCK3	#N/A	#N/A	#N/A				#N/A	#N/A	#N/A
SPON1	#N/A	#N/A	#N/A				#N/A	#N/A	#N/A
SPON2	#N/A	#N/A	#N/A				#N/A	#N/A	#N/A
SPP1	#N/A	#N/A	#N/A				#N/A	#N/A	#N/A
SPP2	#N/A	#N/A	#N/A				#N/A	#N/A	#N/A
SPTY2D1OS	#N/A	#N/A	#N/A				#N/A	#N/A	#N/A
SPX	#N/A	#N/A	#N/A				#N/A	#N/A	#N/A
SRPX	#N/A	Srpx	Srpx				#N/A	#N/A	#N/A
SRPX2	#N/A	#N/A	#N/A				#N/A	#N/A	#N/A
SSC4D	#N/A	#N/A	#N/A				#N/A	#N/A	#N/A
SSC5D	#N/A	#N/A	#N/A				#N/A	#N/A	#N/A
SSPO	#N/A	#N/A	#N/A				#N/A	#N/A	#N/A
SST	#N/A	#N/A	#N/A				#N/A	#N/A	#N/A
ST6GAL1	#N/A	#N/A	#N/A				#N/A	#N/A	#N/A
STATH	#N/A	#N/A	#N/A				#N/A	#N/A	#N/A
STC1	#N/A	#N/A	#N/A				#N/A	#N/A	#N/A
STC2	#N/A	#N/A	#N/A				#N/A	#N/A	Stc2
SVBP	#N/A	#N/A	#N/A				#N/A	#N/A	#N/A
TAC1	#N/A	#N/A	#N/A				#N/A	#N/A	#N/A
TAC3	#N/A	#N/A	#N/A				#N/A	#N/A	#N/A
TAC4	#N/A	#N/A	#N/A				#N/A	#N/A	#N/A
TBL2	#N/A	#N/A	#N/A				#N/A	#N/A	#N/A
TCN1	#N/A	#N/A	#N/A				#N/A	#N/A	#N/A
TCN2	#N/A	#N/A	#N/A				#N/A	#N/A	#N/A
TDGF1	#N/A	#N/A	#N/A				#N/A	#N/A	#N/A
TECTA	#N/A	#N/A	#N/A				#N/A	#N/A	#N/A
TECTB	#N/A	#N/A	#N/A				#N/A	Tectb	Tectb
TEK	#N/A	#N/A	#N/A				#N/A	#N/A	#N/A
TEPP	#N/A	#N/A	#N/A				#N/A	#N/A	#N/A
TEX101	#N/A	#N/A	#N/A				#N/A	#N/A	#N/A
TEX264	#N/A	#N/A	#N/A				#N/A	#N/A	#N/A
TF	#N/A	#N/A	#N/A				#N/A	#N/A	#N/A
TFF1	#N/A	#N/A	#N/A				#N/A	#N/A	#N/A
TFF2	#N/A	Tff2	#N/A				#N/A	#N/A	#N/A
TFF3	Tff3	Tff3	Tff3				#N/A	#N/A	#N/A
TFPI	#N/A	#N/A	#N/A				#N/A	#N/A	#N/A
TFPI2	#N/A	#N/A	#N/A				#N/A	#N/A	#N/A
TFRC	Tfrc	Tfrc	Tfrc				#N/A	#N/A	#N/A
TG	#N/A	#N/A	#N/A				#N/A	#N/A	#N/A
TGFA	#N/A	#N/A	#N/A				#N/A	#N/A	#N/A
TGFB1	#N/A	#N/A	Tgfb1				#N/A	#N/A	#N/A
TGFB2	#N/A	#N/A	#N/A				#N/A	#N/A	#N/A
TGFB3	#N/A	#N/A	#N/A				#N/A	#N/A	#N/A
TGFBI	#N/A	#N/A	#N/A				#N/A	#N/A	#N/A
TGFBR3	#N/A	#N/A	#N/A				#N/A	#N/A	#N/A
THBS1	#N/A	Thbs1	#N/A				#N/A	#N/A	#N/A
THBS2	#N/A	#N/A	#N/A				#N/A	#N/A	#N/A
THBS3	#N/A	#N/A	#N/A				#N/A	#N/A	#N/A
THBS4	#N/A	#N/A	#N/A				#N/A	#N/A	#N/A
THEM6	#N/A	#N/A	#N/A				#N/A	#N/A	#N/A
THNSL2	#N/A	#N/A	#N/A				#N/A	#N/A	#N/A
THPO	#N/A	Thpo	Thpo				#N/A	#N/A	#N/A
THSD4	#N/A	#N/A	#N/A				#N/A	#N/A	#N/A
THSD7A	#N/A	#N/A	#N/A				#N/A	#N/A	#N/A
TIMP1	Timp1	Timp1	Timp1				#N/A	#N/A	#N/A
TIMP2	#N/A	#N/A	#N/A				#N/A	#N/A	#N/A
TIMP3	#N/A	#N/A	#N/A				#N/A	#N/A	#N/A
TIMP4	#N/A	#N/A	#N/A				#N/A	Timp4	Timp4
TINAG	#N/A	Tinag	Tinag				#N/A	#N/A	#N/A
TINAGL1	#N/A	#N/A	#N/A				#N/A	#N/A	#N/A
TLL1	#N/A	#N/A	#N/A				#N/A	#N/A	#N/A
TLL2	#N/A	#N/A	#N/A				#N/A	#N/A	#N/A
TMEFF2	#N/A	#N/A	#N/A				#N/A	#N/A	#N/A
TMEM155	#N/A	#N/A	#N/A				#N/A	#N/A	#N/A
TNC	#N/A	#N/A	#N/A				#N/A	#N/A	#N/A
TNF	Tnf	Tnf	Tnf				#N/A	#N/A	#N/A
TNFAIP6	#N/A	#N/A	#N/A				#N/A	#N/A	#N/A
TNFRSF11B	#N/A	Tnfrsf11b	Tnfrsf11b				#N/A	#N/A	#N/A
TNFRSF18	#N/A	#N/A	#N/A				#N/A	#N/A	#N/A
TNFRSF1A	#N/A	#N/A	#N/A				#N/A	#N/A	#N/A
TNFRSF1B	#N/A	Tnfrsf1b	Tnfrsf1b				#N/A	#N/A	#N/A
TNFRSF25	#N/A	#N/A	#N/A				#N/A	#N/A	#N/A
TNFRSF6B	#N/A	#N/A	#N/A				#N/A	#N/A	#N/A
TNFSF10	Tnfsf10	Tnfsf10	Tnfsf10				#N/A	#N/A	#N/A
TNFSF11	#N/A	#N/A	#N/A				#N/A	#N/A	#N/A
TNFSF12	#N/A	#N/A	#N/A				#N/A	#N/A	#N/A
TNFSF13	#N/A	#N/A	#N/A				#N/A	#N/A	#N/A
TNFSF13B	#N/A	#N/A	#N/A				#N/A	#N/A	#N/A
TNFSF14	#N/A	#N/A	#N/A				#N/A	#N/A	#N/A
TNFSF15	#N/A	#N/A	#N/A				#N/A	#N/A	#N/A
TNN	#N/A	#N/A	#N/A				#N/A	#N/A	#N/A
TNR	#N/A	#N/A	#N/A				#N/A	#N/A	#N/A
TNXB	#N/A	#N/A	#N/A				#N/A	#N/A	#N/A
TOR2A	#N/A	#N/A	#N/A				#N/A	#N/A	#N/A
TPSAB1	#N/A	#N/A	#N/A				#N/A	#N/A	#N/A
TPSB2	#N/A	#N/A	#N/A				#N/A	#N/A	#N/A
TREML4	#N/A	#N/A	#N/A				#N/A	#N/A	#N/A
TRH	#N/A	#N/A	#N/A				#N/A	#N/A	#N/A
TSHB	#N/A	#N/A	#N/A				#N/A	#N/A	#N/A
TSKU	#N/A	#N/A	#N/A				#N/A	#N/A	#N/A
TSLP	#N/A	#N/A	#N/A				#N/A	#N/A	#N/A
TSPEAR	#N/A	#N/A	#N/A				#N/A	#N/A	#N/A
TTC9B	#N/A	#N/A	#N/A				#N/A	#N/A	#N/A
TTR	#N/A	#N/A	#N/A				#N/A	#N/A	#N/A
TUFT1	#N/A	#N/A	#N/A				#N/A	#N/A	#N/A
TULP2	#N/A	#N/A	#N/A				#N/A	#N/A	#N/A
TULP3	#N/A	#N/A	#N/A				#N/A	#N/A	#N/A
TWSG1	#N/A	#N/A	#N/A				#N/A	#N/A	#N/A
TXNDC16	#N/A	Txndc16	#N/A				#N/A	#N/A	#N/A
UCMA	#N/A	#N/A	#N/A				#N/A	#N/A	#N/A
UCN	#N/A	#N/A	#N/A				#N/A	#N/A	#N/A
UCN2	#N/A	#N/A	#N/A				#N/A	#N/A	#N/A
UCN3	#N/A	#N/A	#N/A				#N/A	#N/A	#N/A
ULBP2	#N/A	#N/A	#N/A				#N/A	#N/A	#N/A
UMOD	#N/A	#N/A	#N/A				#N/A	#N/A	#N/A
UTS2	#N/A	#N/A	#N/A				#N/A	#N/A	#N/A
UTS2B	#N/A	#N/A	#N/A				#N/A	#N/A	#N/A
VASH1	#N/A	#N/A	#N/A				#N/A	#N/A	#N/A
VASH2	#N/A	#N/A	#N/A				#N/A	#N/A	#N/A
VASN	#N/A	#N/A	#N/A				#N/A	#N/A	#N/A
VCAN	#N/A	#N/A	#N/A				#N/A	#N/A	#N/A
VEGFA	#N/A	#N/A	#N/A				#N/A	#N/A	#N/A
VEGFB	#N/A	#N/A	#N/A				#N/A	#N/A	#N/A
VEGFC	#N/A	#N/A	#N/A				#N/A	#N/A	#N/A
VEGFD	#N/A	#N/A	#N/A				#N/A	#N/A	#N/A
VGF	#N/A	#N/A	#N/A				#N/A	#N/A	#N/A
VIP	#N/A	#N/A	#N/A				#N/A	#N/A	#N/A
VIT	#N/A	#N/A	#N/A				#N/A	#N/A	#N/A
VMO1	#N/A	#N/A	#N/A				#N/A	#N/A	#N/A
VNN3	#N/A	#N/A	#N/A				#N/A	#N/A	#N/A
VSTM1	#N/A	#N/A	#N/A				#N/A	#N/A	#N/A
VSTM2A	#N/A	#N/A	#N/A				#N/A	#N/A	#N/A
VSTM2L	#N/A	#N/A	#N/A				#N/A	#N/A	#N/A
VSTM4	#N/A	#N/A	#N/A				#N/A	#N/A	#N/A
VTN	#N/A	#N/A	#N/A				#N/A	#N/A	#N/A
VWA1	#N/A	#N/A	#N/A				#N/A	#N/A	#N/A
VWA2	#N/A	#N/A	#N/A				#N/A	Vwa2	#N/A
VWA3A	#N/A	#N/A	#N/A				#N/A	#N/A	#N/A
VWA5B1	#N/A	#N/A	#N/A				#N/A	#N/A	#N/A
VWA7	#N/A	#N/A	#N/A				#N/A	#N/A	#N/A
VWC2	#N/A	#N/A	#N/A				#N/A	#N/A	#N/A
VWC2L	#N/A	#N/A	#N/A				#N/A	#N/A	#N/A
VWCE	#N/A	#N/A	#N/A				#N/A	#N/A	#N/A
VWDE	#N/A	#N/A	#N/A				#N/A	#N/A	#N/A
VWF	#N/A	#N/A	#N/A				#N/A	#N/A	#N/A
WDR25	#N/A	#N/A	#N/A				#N/A	#N/A	#N/A
WFDC1	#N/A	#N/A	#N/A				Wfdc1	#N/A	#N/A
WFDC10A	#N/A	#N/A	#N/A				#N/A	#N/A	#N/A
WFDC10B	#N/A	#N/A	#N/A				#N/A	#N/A	#N/A
WFDC11	#N/A	#N/A	#N/A				#N/A	#N/A	#N/A
WFDC12	#N/A	#N/A	#N/A				#N/A	#N/A	#N/A
WFDC13	#N/A	#N/A	#N/A				#N/A	#N/A	#N/A
WFDC2	Wfdc2	Wfdc2	Wfdc2				#N/A	#N/A	#N/A
WFDC3	#N/A	#N/A	#N/A				#N/A	Wfdc3	Wfdc3
WFDC5	#N/A	#N/A	#N/A				#N/A	#N/A	#N/A
WFDC6	#N/A	#N/A	#N/A				#N/A	#N/A	#N/A
WFDC8	#N/A	#N/A	#N/A				#N/A	Wfdc8	Wfdc8
WFDC9	#N/A	#N/A	#N/A				#N/A	#N/A	#N/A
WFIKKN1	#N/A	#N/A	#N/A				#N/A	#N/A	#N/A
WFIKKN2	#N/A	#N/A	#N/A				#N/A	#N/A	#N/A
WIF1	#N/A	#N/A	#N/A				Wif1	Wif1	Wif1
WISP1	#N/A	#N/A	#N/A				#N/A	#N/A	#N/A
WISP2	#N/A	#N/A	#N/A				#N/A	#N/A	#N/A
WISP3	#N/A	#N/A	#N/A				#N/A	#N/A	#N/A
WNT1	#N/A	#N/A	#N/A				#N/A	#N/A	#N/A
WNT10A	#N/A	#N/A	#N/A				#N/A	#N/A	#N/A
WNT10B	#N/A	#N/A	#N/A				#N/A	#N/A	#N/A
WNT11	#N/A	#N/A	#N/A				#N/A	#N/A	#N/A
WNT16	#N/A	#N/A	#N/A				#N/A	#N/A	#N/A
WNT2	#N/A	#N/A	#N/A				#N/A	#N/A	#N/A
WNT2B	#N/A	#N/A	#N/A				#N/A	#N/A	#N/A
WNT3	#N/A	#N/A	#N/A				#N/A	#N/A	#N/A
WNT3A	#N/A	#N/A	#N/A				#N/A	#N/A	#N/A
WNT4	#N/A	#N/A	Wnt4				#N/A	#N/A	#N/A
WNT5A	#N/A	#N/A	#N/A				#N/A	#N/A	#N/A
WNT5B	#N/A	#N/A	#N/A				#N/A	#N/A	#N/A
WNT6	#N/A	#N/A	#N/A				#N/A	#N/A	#N/A
WNT7A	#N/A	#N/A	#N/A				#N/A	#N/A	#N/A
WNT7B	#N/A	#N/A	#N/A				#N/A	#N/A	#N/A
WNT8A	#N/A	#N/A	#N/A				#N/A	#N/A	#N/A
WNT8B	#N/A	#N/A	#N/A				#N/A	#N/A	#N/A
WNT9A	#N/A	#N/A	#N/A				#N/A	#N/A	#N/A
WNT9B	#N/A	#N/A	#N/A				#N/A	#N/A	#N/A
XCL1	#N/A	#N/A	#N/A				#N/A	#N/A	#N/A
XCL2	#N/A	#N/A	#N/A				#N/A	#N/A	#N/A
XYLT1	#N/A	#N/A	#N/A				#N/A	#N/A	#N/A
XYLT2	#N/A	#N/A	#N/A				#N/A	#N/A	#N/A
ZG16	#N/A	#N/A	#N/A				#N/A	#N/A	#N/A
ZG16B	#N/A	#N/A	#N/A				#N/A	#N/A	#N/A
ZP1	#N/A	#N/A	#N/A				#N/A	#N/A	#N/A
ZP2	#N/A	#N/A	#N/A				#N/A	#N/A	#N/A
ZP3	#N/A	#N/A	#N/A				#N/A	#N/A	#N/A
ZP4	#N/A	#N/A	#N/A				#N/A	#N/A	#N/A
ZPBP	#N/A	#N/A	#N/A				#N/A	#N/A	#N/A
ZPBP2	#N/A	#N/A	#N/A				#N/A	#N/A	Zpbp2

## Sheet: Upregulated SP
AP - upregulated				DP - upregulated				LP - upregulated				VP - upregulated
mPIN	MT	AT		mPIN	MT	AT		mPIN	MT	AT		mPIN	MT	AT
Abo	Abo	Abo		Anxa1	Agrn	Adam12		Adm2	Adam12	Adam12		Anxa1	Agrn	Adamts4
Adam28	Adam28	Adam28		Anxa2	Ambp	Adamts10		Anxa1	Adamts15	Adamts10		Btbd17	Anxa1	Adm2
Agrn	Agrn	Adamts15		Btc	Anxa1	Adamts15		Anxa2	Adamts4	Adamts15		Btc	Anxa2	Ahsg
Anxa1	Anxa1	Adamtsl2		Ccl28	Anxa2	Adamts4		Apln	Adm2	Adamts4		Ccl28	Btbd17	Angpt1
Anxa2	Anxa2	Adamtsl4		Cd14	Btc	Ager		Btbd17	Agt	Adamts7		Ccl8	Btc	Anxa1
Apln	Apln	Agrn		Cfi	Cbln1	Angpt2		Btc	Anxa1	Adm2		Cd14	C1qa	Apln
Artn	Artn	Anxa1		Clu	Ccl28	Angptl4		Cbln1	Anxa2	Ager		Cd44	C1qb	Btbd17
Atrn	Atrn	Anxa2		Col11a2	Ccl3	Anxa1		Ccl2	Apln	Anxa1		Cfi	C1qc	Btc
Btc	Btbd17	Apln		Cxcl1	Cd14	Anxa2		Ccl28	Apob	Anxa2		Chit1	C3	C1qtnf6
Calca	Btc	Artn		Cxcl16	Cd44	Aoah		Cd14	Apoc2	Aoah		Clu	C4a	Calcb
Cbln3	Calca	Atrn		Cxcl2	Cfb	Apln		Cd44	Bdnf	Apln		Col11a2	C4b	Ccl2
Cck	Cbln3	Btbd17		Cxcl3	Cfi	Bmp1		Cfb	Btbd17	Apob		Cxcl1	Calcb	Ccl28
Ccl28	Cck	Btc		Cxcl5	Chad	Btc		Cfi	Btc	Apoc2		Cxcl16	Ccl2	Ccl3
Ccl3	Ccl28	C1qa		Dmbt1	Chit1	C1qa		Chit1	C1qa	Bdnf		Cxcl2	Ccl28	Ccl4
Ccl4	Ccl3	C1qb		Edn1	Clu	C1qb		Clu	C1qb	Bmp1		Cxcl3	Ccl3	Ccl7
Cd14	Ccl4	C1qc		F3	Col11a2	C1qc		Col11a2	C2	Btbd17		Cxcl5	Ccl4	Ccl8
Cd44	Cd14	C3		Hgfac	Ctsw	C1qtnf6		Csf2ra	C3	Btc		Dmbt1	Ccl8	Cd14
Cfi	Cd44	C4a		Hpse	Cx3cl1	C2		Cx3cl1	C4a	C1qa		F3	Cd14	Cd44
Clps	Cdsn	C4b		Hpx	Cxcl1	C3		Cxcl1	C4b	C1qb		F5	Cd44	Cfb
Clu	Cfb	Calca		Il1b	Cxcl11	Calca		Cxcl11	Calca	C1qc		Folr1	Cfb	Cfi
Col11a2	Cfi	Calcb		Il1rn	Cxcl16	Ccl17		Cxcl16	Calcb	C3		Ifne	Cfi	Chit1
Ctsb	Clu	Cbln3		Isg15	Cxcl17	Ccl2		Cxcl17	Ccl2	Calca		Ihh	Chit1	Chrdl2
Cx3cl1	Col11a2	Ccdc3		Lama5	Cxcl2	Ccl22		Cxcl5	Ccl22	Calcb		Il18bp	Chrdl2	Cntn2
Cxcl1	Col17a1	Cck		Lgals3	Cxcl3	Ccl28		Cyr61	Ccl28	Cck		Il1rn	Clca1	Col11a2
Cxcl11	Col7a1	Ccl17		Lgals3bp	Cxcl5	Ccl3		Dmbt1	Ccl3	Ccl17		Isg15	Clu	Col9a3
Cxcl16	Col9a3	Ccl2		Lif	Dmbt1	Ccl4		Dnase1l2	Ccl4	Ccl2		Lad1	Col11a2	Ctsb
Cxcl17	Cp	Ccl28		Ltbp2	Dnase1l2	Ccl5		Edn1	Ccl5	Ccl22		Lcn2	Col17a1	Cxcl1
Cxcl2	Cpn1	Ccl3		Ltf	Edn1	Ccl7		F3	Ccl7	Ccl28		Lgals3	Cp	Cxcl10
Cxcl3	Ctsb	Ccl4		Ly6k	F3	Ccl8		F5	Ccl8	Ccl3		Lgals3bp	Cpa2	Cxcl11
Cxcl5	Ctsw	Ccl5		Man2b2	F5	Cd14		Fam19a3	Cd14	Ccl4		Lgals9	Csf1	Cxcl16
Dmbt1	Cx3cl1	Cd14		Mmp3	Fam3b	Cd44		Fam3b	Cd44	Ccl7		Lif	Ctsb	Cxcl17
Dnase1l2	Cxcl1	Cd44		Muc1	Gzmm	Cfi		Folr1	Cd6	Ccl8		Lipc	Cxcl1	Cxcl2
Edn1	Cxcl10	Cdsn		Olfm4	Habp2	Chsy1		Hbegf	Cdsn	Cd14		Lrg1	Cxcl10	Cxcl3
Edn2	Cxcl11	Cela1		Pcyox1l	Hgfac	Clca1		Hp	Cfb	Cd40		Ltf	Cxcl11	Cxcl5
Efna1	Cxcl13	Cfb		Pglyrp1	Hp	Clu		Hpse	Cfi	Cd44		Ly6k	Cxcl16	Dkkl1
Efna4	Cxcl16	Cfi		Prss27	Hpse	Col11a2		Ifne	Chit1	Cdsn		Mmp3	Cxcl17	Dmbt1
F3	Cxcl17	Clps		Psapl1	Hpx	Col1a1		Il18bp	Clca1	Cfb		Mmp7	Cxcl2	F3
F5	Cxcl2	Clu		Reg3g	Ihh	Col9a3		Il1a	Clu	Cfi		Muc1	Cxcl3	Fam19a3
Fam3b	Cxcl3	Col11a2		Serpina9	Il1b	Cst7		Il1b	Col11a2	Chit1		Muc13	Cxcl5	Fam20a
Fam3c	Cxcl5	Col16a1		Sftpd	Il1rn	Cthrc1		Il1rn	Col1a1	Chsy1		Muc20	Dkkl1	Fetub
Fetub	Dmbt1	Col17a1		Sspo	Inha	Ctsb		Isg15	Col9a3	Clca1		Npnt	Dmbt1	Flt4
Fgfbp3	Dnase1l2	Col7a1		Tff3	Inhbb	Ctsw		Lad1	Crp	Clu		Olfm4	Endod1	Folr1
Gzmm	Edn1	Col9a3		Tfrc	Isg15	Cxcl1		Lama5	Csf2ra	Col11a2		Pglyrp1	F3	Gdf15
Habp2	Edn2	Colq		Thbs1	Lad1	Cxcl16		Lcn2	Ctsb	Col1a1		Prss27	F5	Gdf3
Hgfac	Efna1	Cp		Timp1	Lama5	Cxcl2		Lgals3	Cxcl1	Col5a3		Psapl1	Fam19a3	Grn
Hpse	Efna4	Cpn1		Tnf	Lgals3	Cxcl3		Lgals3bp	Cxcl10	Col9a3		Qsox1	Fetub	Guca2a
Hpx	F3	Csf3		Tnfsf10	Lgals3bp	Cxcl5		Lgals9	Cxcl11	Cpa2		Reg3g	Folr1	Hgf
Igfals	F5	Cthrc1		Wfdc2	Lgals9	Cyr61		Lif	Cxcl16	Crp		Serpini1	Gdf15	Hpse
Igfbp5	Fam19a3	Ctsb		Wnt4	Lif	Dkk3		Lrcol1	Cxcl17	Csf2ra		Sftpd	Gdf3	Ifne
Ihh	Fam3b	Cx3cl1			Liph	Dmbt1		Lrg1	Cxcl5	Ctsb		Tff3	Grn	Igfbp3
Il1b	Fam3c	Cxcl1			Lrg1	Dmkn		Ltbp2	Cyr61	Ctsw		Tfrc	Guca2a	Igfbp7
Il1rn	Fetub	Cxcl10			Ltbp2	Draxin		Ltf	Dmbt1	Cxcl1		Timp1	Hgf	Ihh
Inha	Fgfbp3	Cxcl11			Ltf	Ebi3		Ly6k	F3	Cxcl11		Tnf	Hgfac	Il18bp
Insl6	Fstl4	Cxcl13			Ly6k	Edn1		Mgat4a	F5	Cxcl16		Tnfsf10	Hpse	Il1a
Isg15	Guca2a	Cxcl16			Lypd8	Esm1		Mmp3	Fam3b	Cxcl5		Wfdc2	Ifne	Il1b
Lama5	Gzmm	Cxcl17			Man2b2	F3		Muc1	Fetub	Cyr61			Ihh	Il1rn
Lbp	Habp2	Cxcl2			Metrnl	Fetub		Muc13	Folr1	Dkkl1			Il18bp	Inhbb
Lcn2	Hgfac	Cxcl3			Mgat4a	Frzb		Muc20	Gdf3	Dmbt1			Il1b	Isg15
Lgals3	Hpse	Cxcl5			Mmp3	Gdf3		Npnt	Guca2a	Ebi3			Il1rn	Lad1
Lgals3bp	Hpx	Cyr61			Muc1	Glb1l		Olfm4	Guca2b	F3			Isg15	Lag3
Lgals9	Hyal3	Dkk3			Npb	Guca2a		Pamr1	Hgf	Fam20a			Lad1	Lcn2
Lif	Igfals	Dmbt1			Npnt	Hgf		Pcsk1	Hp	Fetub			Lag3	Lefty1
Liph	Igfbp5	Dnase1l2			Nucb2	Hgfac		Pcsk9	Hpse	Gdf3			Lama3	Lgals3
Lrcol1	Igfbp7	Edn1			Olfm4	Hpse		Pcyox1l	Hpx	Gpx7			Lcn2	Lgals3bp
Lrg1	Ihh	Edn2			Osm	Hpx		Pdgfb	Ifne	Guca2a			Lefty1	Lgals9
Ltbp2	Il1a	Efna1			Otos	Ibsp		Pglyrp1	Il18bp	Guca2b			Lgals3	Lif
Ltf	Il1b	Efna4			Pamr1	Igf1		Prss22	Il1a	Hbegf			Lgals3bp	Lipc
Ly6k	Il1rn	F3			Pcsk1	Igfbp3		Prss27	Il1b	Hpse			Lgals9	Lrg1
Lypd8	Il33	F5			Pcsk9	Il11		Psapl1	Il1rn	Hpx			Lif	Lrp8
Lyzl4	Il7	Fam3b			Pcyox1l	Il12b		Pvr	Il33	Ifne			Lipc	Ltf
Man2b2	Inha	Fam3c			Pglyrp1	Il1a		Qsox1	Inhbb	Igfbp7			Lrg1	Ly6k
Mei1	Inhbb	Fetub			Pon3	Il1b		Reg3g	Isg15	Il1a			Lrp8	Lypd8
Metrnl	Isg15	Frzb			Prss22	Il1rn		Rptn	Lad1	Il1b			Ltbp2	Mmp11
Mgat4a	Lad1	Gdf3			Prss27	Il33		S100a9	Lag3	Il1rn			Ltf	Mmp3
Mia	Lag3	Gpx7			Psapl1	Il6		Scgb3a1	Lbp	Il34			Ly86	Mmp7
Mif	Lama5	Guca2a			Pvr	Inhbb		Scpep1	Lcn2	Isg15			Lypd8	Mmp8
Mmp11	Lamb3	Gzmm			Qsox1	Isg15		Sfn	Lefty1	Lad1			Mdk	Muc1
Mmp16	Lamc2	Habp2			Reg3g	Lag3		Sftpd	Lgals3	Lag3			Mgat4a	Muc13
Mmp3	Lbp	Hbegf			S100a9	Lama5		Smpdl3b	Lgals3bp	Lama3			Mmp11	Muc4
Mmp7	Lcn2	Hgfac			Scgb1c1	Lbp		Tff3	Lgals9	Lamb3			Mmp3	Npnt
Msmb	Lefty1	Hp			Scgb3a1	Lefty1		Tfrc	Lif	Lefty1			Mmp7	Oaf
Muc1	Lgals3	Hpse			Sdc1	Lgals3		Timp1	Lrg1	Lgals3			Muc1	Olfm4
Npb	Lgals3bp	Hpx			Sdc4	Lgals3bp		Tnf	Lrp8	Lgals3bp			Muc13	Osm
Npnt	Lgals9	Ibsp			Sema3f	Lgals9		Tnfrsf1b	Ltbp2	Lgals9			Muc20	Pcsk1
Nucb2	Lif	Igfals			Serpina9	Lif		Tnfsf10	Ltf	Lif			Muc4	Pcsk9
Oaf	Lrg1	Igfbp7			Sftpd	Lilra5		Txndc16	Ly6k	Lpo			Ndnf	Pcyox1l
Otos	Lrp8	Ihh			Smpdl3b	Lipg		Wfdc2	Ly86	Lrp8			Npnt	Pdcd1lg2
Pamr1	Ltbp1	Il1a			Spink5	Loxl3		Wnt7b	Lypd8	Ltbp2			Oaf	Pdgfb
Pcsk1	Ltbp2	Il1b			Spint1	Ltbp2			Mdk	Ltf			Olfm4	Pglyrp1
Pcyox1l	Ltf	Il1rn			Sspo	Ltf			Metrnl	Ly86			Osm	Pglyrp4
Pglyrp1	Ly6k	Il33			Stc2	Ly6k			Mgat4a	Lypd8			Pamr1	Pkdcc
Pon3	Ly86	Il34			Tac1	Ly86			Mmp11	Mdk			Pcsk1	Plat
Prss22	Lypd8	Il7			Tff2	Lypd8			Mmp3	Metrnl			Pcsk9	Prss27
Prss27	Man2b2	Inha			Tff3	Man2b2			Muc1	Mfap2			Pcyox1l	Psapl1
Prss53	Metrnl	Inhbb			Tfrc	Mdk			Muc13	Mfge8			Pdgfb	Ptk7
Psapl1	Mfge8	Insl6			Thbs1	Metrnl			Muc4	Mgat4a			Pglyrp1	Ptprz1
Ptprz1	Mgat4a	Isg15			Timp1	Mfap2			Ndnf	Mmp11			Pla2g7	Ptx3
Qsox1	Mia	Klk1			Timp4	Mgp			Npnt	Mmp3			Plat	Pvr
Reg3g	Mif	Lad1			Tnf	Mmp11			Oaf	Muc1			Prss12	Qsox1
S100a9	Mmp11	Lag3			Tnfsf10	Mmp3			Olfm4	Muc13			Prss27	Reg3g
Scgb1c1	Mmp3	Lama5			Ttr	Muc1			Pcsk1	Muc4			Psapl1	S100a9
Scpep1	Mmp7	Lamb3			Wfdc2	Napsa			Pcsk9	Napsa			Ptk7	Sbsn
Sdc1	Muc1	Lamc2			Wnt4	Nbl1			Pcyox1l	Ndnf			Qsox1	Scgb3a1
Sdc4	Muc13	Lbp				Ntn4			Pdgfb	Nmb			R3hdml	Scpep1
Sema3f	Muc4	Lcn2				Nxpe4			Pdgfrl	Npnt			Reg3g	Sdc1
Serpina10	Muc5b	Lefty1				Oaf			Pglyrp1	Oaf			S100a9	Serpini1
Spink5	Ndnf	Lgals3				Olfm4			Pkdcc	Oit3			Scgb3a1	Sfn
Sspo	Npnt	Lgals3bp				Olfml3			Pla2g10	Olfm4			Scpep1	Sftpd
Stc2	Nucb2	Lgals9				Osm			Plat	Osm			Sdc1	Smpdl3b
Tff3	Oaf	Lif				Pcsk9			Prss22	Pcsk9			Serpina9	Srpx
Them6	Osm	Lipg				Pcyox1l			Prss27	Pcyox1l			Serpini1	Tff3
Thpo	Otos	Lrg1				Pdcd1lg2			Prtn3	Pdcd1lg2			Sfn	Tfrc
Timp2	Pam	Lrp8				Pdgfb			Psapl1	Pdgfb			Sftpd	Tgfb1
Timp4	Pamr1	Ltbp1				Pdgfc			Pvr	Pdgfrl			Smpdl3b	Thpo
Tnf	Pcsk1	Ltbp2				Pdgfrl			Qsox1	Pglyrp1			Srpx	Timp1
Tnfrsf1b	Pcsk9	Ltf				Pglyrp1			Reg3g	Pilra			Tff2	Tinag
Tnfsf10	Pcyox1l	Ly6k				Pkdcc			S100a9	Pkdcc			Tff3	Tnf
Wfdc2	Pdgfb	Ly86				Plat			Scgb1a1	Pla2g10			Tfrc	Tnfrsf11b
Wnt4	Pglyrp1	Lypd8				Plod3			Scgb3a1	Pla2g7			Thbs1	Tnfrsf1b
Xcl1	Pon3	Man2b2				Podnl1			Scpep1	Plat			Thpo	Tnfsf10
	Prss22	Mdk				Prss27			Sdc1	Plod3			Timp1	Wfdc2
	Prss27	Mfge8				Prtn3			Serpine1	Prss22			Tinag	Wnt4
	Psapl1	Mgat4a				Psapl1			Sfn	Prtn3			Tnf
	Ptprz1	Mia				Ptk7			Sftpd	Psapl1			Tnfrsf11b
	Qsox1	Mif				Pvr			Slpi	Ptk7			Tnfrsf1b
	Reg3g	Mmp11				Pxdn			Smpdl3b	Pvr			Tnfsf10
	S100a9	Mmp28				Reg3g			Tff3	Pxdn			Txndc16
	Scpep1	Mmp3				S100a13			Tfrc	Pyy			Wfdc2
	Sdc1	Mmp7				S100a9			Thbs1	Qsox1
	Sdc4	Muc1				Scpep1			Thpo	Reg3g
	Sema3f	Muc13				Sdc1			Timp1	Reg4
	Serpina10	Muc4				Serpina9			Tinag	S100a13
	Serpine1	Muc5b				Serpine1			Tnf	S100a9
	Sfn	Napsa				Sfn			Tnfrsf11b	Scpep1
	Spink5	Ndnf				Sftpd			Tnfrsf1b	Sdc1
	Sspo	Npnt				Smpdl3b			Tnfsf10	Serpine1
	Stc2	Nucb2				Sspo			Tsku	Serpini1
	Tff3	Oaf				Tff3			Ttr	Sfn
	Tfrc	Osm				Tfrc			Txndc16	Sftpd
	Thbs1	Pamr1				Tgfb1			Wfdc2	Slpi
	Them6	Pcsk1				Thbs1			Xcl1	Smpdl3b
	Thpo	Pcsk9				Thpo				Spp1
	Thsd4	Pcyox1l				Timp1				Tff3
	Timp2	Pdgfb				Timp2				Tfrc
	Timp4	Pglyrp1				Tinag				Tgfb1
	Tinag	Pglyrp4				Tnf				Thbs1
	Tnf	Pkdcc				Tnfrsf11b				Thpo
	Tnfrsf1b	Pla2g2e				Tnfrsf1b				Timp1
	Tnfsf10	Plat				Tnfrsf25				Tinag
	Vnn3	Pon3				Tnfsf10				Tnf
	Vwa7	Ppbp				Tnfsf13b				Tnfrsf11b
	Wfdc12	Prss22				Tsku				Tnfrsf1b
	Wfdc2	Prss27				Vasn				Tnfrsf25
	Wnt4	Prtn3				Vcan				Tnfsf10
	Xcl1	Psapl1				Vstm4				Tsku
		Ptk7				Wfdc2				Ttr
		Ptprs				Wnt11				Wfdc2
		Ptprz1				Wnt16				Wnt11
		Qsox1				Wnt2
		Reg3g				Wnt4
		Rgma				Wnt7a
		S100a13				Xcl1
		S100a9				Zpbp
		Scpep1
		Sdc1
		Sdc4
		Sema3f
		Serpina10
		Serpine1
		Sfn
		Slpi
		Slurp1
		Spink5
		Sspo
		Stc2
		Tff3
		Tfrc
		Tgfb1
		Thbs1
		Them6
		Thpo
		Thsd4
		Timp1
		Timp4
		Tinag
		Tnf
		Tnfrsf11b
		Tnfrsf1b
		Tnfsf10
		Vash1
		Vnn3
		Vwa7
		Wfdc12
		Wfdc2
		Wnt11
		Wnt4

## Sheet: Downregulated SP
AP - downregulated				DP - downregulated				LP - dowregulated				VP - downregulated
mPIN	MT	AT		mPIN	MT	AT		mPIN	MT	AT		mPIN	MT	AT
Ace	Ace	Ace		Adamts8	Adamts8	Abo		Abo	Abo	Abo		Adamts8	Abo	Abo
Adamts8	Adamts17	Adamts8		Ang	Ang	Ace		Adamts8	Adam28	Ace		Bmp8b	Adamts8	Adamts8
Ang	Adamts8	Adipoq		Apoa5	Apoa5	Acpp		Angptl1	Adamts8	Adam28		Ccl24	Aoc3	Angptl7
Aoc3	Ang	Ang		Azgp1	Apof	Adam28		Angptl7	Apoc1	Adamts8		Cgref1	Apod	Aoc3
Apoa5	Angptl7	Angptl7		Bmp7	Aspn	Adamts8		Aoc3	Apof	Adipoq		Coch	Azgp1	Apod
Bmp7	Aoc3	Aoc3		C1rl	Azgp1	Ang		Apoc1	Art4	Apoc1		Col6a6	Bmp7	Azgp1
C1rl	Aspn	Apod		Ccdc126	Bmp7	Apoa5		Apod	Azgp1	Apod		Col9a2	Bmp8b	Bmp7
Ccdc126	Azgp1	Apof		Ccl11	Bmp8b	Apoc1		Apof	Bmp5	Apof		Cpxm2	C1qtnf4	Bmp8b
Ccl11	Bmp7	Azgp1		Cgref1	C1rl	Apod		Aspn	Bmp7	Art4		Creg2	C1qtnf9	C1qtnf4
Ccl24	C1rl	Bmp7		Chrdl2	Ccdc126	Apof		Azgp1	Bmp8b	Azgp1		Defb1	Ccbe1	Ccbe1
Cd163	Ccdc126	C1rl		Cilp2	Ccl11	Azgp1		Bmp7	C1ql3	Bmp7		Edn3	Ccl24	Cd163
Cgref1	Ccl11	Ccl11		Coch	Ccl24	Bmp7		Bmp8b	C1qtnf9	Bmp8b		Endou	Cgref1	Cgref1
Clec18a	Ccl24	Cd163		Col4a6	Cgref1	Bmp8b		C1qtnf9	Ccdc80	Ccbe1		Fmod	Cilp2	Clec3b
Clec3b	Cd163	Cgref1		Col6a6	Chrdl2	C1qtnf4		C1rl	Cgref1	Ccl11		Grem2	Clps	Clps
Cma1	Cgref1	Clec18a		Col9a2	Cilp2	Ccdc126		Ccbe1	Cilp2	Cd163		Hhip	Col6a6	Col6a6
Col28a1	Chrdl1	Col4a6		Cpa3	Clec18a	Ccl11		Ccl11	Clps	Cdnf		Iapp	Col9a2	Col9a2
Col4a6	Clec18a	Cpa3		Creg2	Cma1	Cd163		Ccl24	Coch	Cgref1		Ibsp	Cpxm2	Cpxm2
Col6a6	Clec3b	Creg2		Cytl1	Coch	Cgref1		Cd163	Col4a6	Cilp2		Ism1	Creg2	Creg2
Cpa3	Cma1	Creld2		Defb1	Col4a6	Cilp2		Cdnf	Col9a2	Clec3b		Ism2	Creld2	Crtac1
Creg2	Col4a6	Cytl1		Dkkl1	Col6a6	Clec18a		Cela1	Cpxm2	Clps		Itih5	Crtac1	Cytl1
Cxcl12	Col6a6	Defb1		Egfl6	Col9a2	Clec3b		Cgref1	Creg1	Cma1		Itln1	Cytl1	Defb1
Cytl1	Cpa3	Dkkl1		Enho	Cpa3	Cma1		Cilp2	Creg2	Coch		Lamc3	Defb1	Ecm2
Dkkl1	Creg1	Dpp4		Fam19a5	Creg2	Coch		Clec3b	Creld2	Col6a6		Lgi1	Ecm2	Edn2
Dpp4	Creg2	Egfl6		Fgl1	Creld2	Col28a1		Clps	Cytl1	Cpa3		Lgi3	Endou	Fgf1
Ecm2	Cytl1	Fam19a5		Gdf15	Cytl1	Col4a6		Cma1	Defb1	Cpxm2		Lypd6	Fmod	Fmod
Edn3	Defb1	Fgf1		Glb1l2	Defb1	Col6a6		Coch	Endou	Creg2		Mepe	Gfod1	Glt1d1
Egfl6	Dkkl1	Fgl1		Grem2	Dkkl1	Cpa3		Col4a6	Fgf1	Creld2		Msmb	Glt1d1	Hhip
Fam19a5	Dpp4	Folr1		Hhip	Ecm2	Creg2		Col6a6	Fgl1	Cytl1		Myoc	Grem2	Ibsp
Fgl1	Ecm2	Gdf15		Ibsp	Enho	Cxcl13		Col9a2	Fmod	Defb1		Nptx2	Hhip	Igfals
Folr2	Edn3	Gdf7		Ism1	Fam19a5	Cytl1		Cpa3	Glb1l2	Ecm2		Nrg2	Ibsp	Igfbp2
Fst	Egfl6	Glb1l2		Ism2	Fgf10	Defb1		Cpxm2	Glt1d1	Fas		Nrp2	Igfbp2	Il17d
Gdf15	Fam19a5	Gpha2		Itih5	Fgl1	Dkkl1		Creg2	Gpld1	Fgf1		Ntn1	Il17d	Ism1
Gpha2	Fgf10	Gpld1		Itln1	Folr2	Edn2		Creld2	Grem2	Fgl1		Nxph3	Ism1	Ism2
Gpld1	Fgl1	Hhip		Lamc3	Fst	Edn3		Cytl1	Hhip	Fmod		Ogn	Ism2	Itih5
Grem2	Folr1	Htra4		Lcat	Gdf15	Enho		Defb1	Ibsp	Glb1l2		Optc	Itih5	Itln1
Hhip	Folr2	Ism2		Lgi1	Gdf7	Fam19a5		Ecm2	Igfbp2	Glt1d1		Pappa	Itln1	Lamc3
Htra4	Fst	Itih5		Lgi3	Glb1l2	Fas		Edn3	Il17d	Gsn		Pappa2	Lamc3	Lgi1
Igfbp2	Gdf15	Lamc3		Lipc	Grem2	Fgf1		Endou	Ism1	Habp2		Pcolce2	Lepr	Lgi3
Il1rl1	Gdf7	Lep		Lypd6	Hhip	Fgl1		Fgf1	Ism2	Hhip		Pla2g2d	Lgi1	Lypd6
Ism1	Glb1l2	Lgi1		Mmp17	Htra4	Folr1		Fgf10	Itih5	Iapp		Pnliprp1	Lgi3	Mfap4
Ism2	Gpha2	Lgi3		Mmp20	Ibsp	Glb1l2		Fgl1	Itln1	Ibsp		Prelp	Lypd6	Mmp16
Itih5	Gpld1	Lipc		Mmrn1	Igfbp2	Glt1d1		Fmod	Lamc3	Igfals		Proc	Mei1	Mmrn1
Itln1	Grem2	Lypd6		Msmb	Il1rap	Gpld1		Folr2	Lgi1	Igfbp2		Reln	Msmb	Msmb
Lama2	Hhip	Manf		Myoc	Ism1	Grem2		Fst	Lgi3	Il17d		Rnase1	Myoc	Myoc
Lama3	Htra4	Mmp17		Ngf	Ism2	Hhip		Glt1d1	Lypd6	Ism1		Rspo2	Nptx2	Nptx2
Lamc3	Igfbp2	Mmrn1		Nptx1	Itih5	Hmcn2		Grem2	Manf	Ism2		Scube2	Nrg2	Nrg2
Lgi1	Il1rap	Myoc		Nptx2	Itln1	Htra4		Hhip	Mmp17	Itih5		Spock2	Ntn1	Nucb2
Lgi2	Ism1	Nptx2		Nrg2	Klk14	Igfals		Iapp	Mmrn1	Itln1		Wfdc1	Nucb2	Ogn
Lgi3	Itih5	Nxpe3		Nxpe3	Lamc3	Igfbp2		Ibsp	Msmb	Lamc3		Wif1	Ogn	Olfml1
Lpl	Itln1	Ogn		Ogn	Lcat	Ism1		Igfbp2	Myoc	Lgi1			Optc	Optc
Lypd6	Lama2	Optc		Olfm1	Lgi1	Ism2		Iglon5	Nell2	Lgi3			Papln	Papln
Mmp17	Lamc3	Pappa2		Optc	Lgi2	Itih5		Il17d	Nptx2	Manf			Pappa2	Pappa
Mmrn1	Lcat	Pcolce2		Pappa	Lgi3	Itln1		Il1rap	Nrg2	Mmrn1			Pip	Pappa2
Myoc	Lgi1	Pnliprp1		Pappa2	Lipc	Klk10		Ism1	Nrtn	Msmb			Pnliprp1	Pcolce2
Nell2	Lgi3	Prss16		Pla2g2d	Lypd6	Lamc3		Ism2	Ntn1	Myoc			Prelp	Pip
Ngf	Lipc	Reln		Pnliprp1	Mmp17	Lgi1		Itih5	Nucb2	Nptx2			Proc	Pla2g2d
Nptx2	Lypd6	Rnase1		Proc	Mmp20	Lipc		Itln1	Nxpe3	Nrg2			Prss53	Pnliprp1
Ntn1	Manf	Rspo2		Rnase1	Mmp9	Lypd6		Lama2	Ogn	Nrtn			Reln	Prelp
Nxpe3	Mmp17	Scube2		Rnase4	Mmrn1	Lyzl4		Lamc3	Optc	Ntn1			Retn	Proc
Ogn	Mmrn1	Serpina5		Rspo2	Msmb	Met		Lepr	Papln	Nucb2			Rnase1	Prss53
Olfm1	Myoc	Tfpi		Scube2	Myoc	Mmp16		Lgi1	Pappa	Nxpe3			Rspo2	Reln
Optc	Ngf	Tgfbr3		Serpina5	Nell2	Mmp20		Lgi3	Pappa2	Ogn			Scube2	Rnase1
Pappa	Nptx2	Tpsb2		Sost	Ngf	Mmp7		Ltbp4	Pcolce2	Olfml1			Spock2	Sbspon
Pappa2	Nrg1	Tulp2		Tgfb2	Nptx1	Mmrn1		Lypd6	Pla2g12a	Olfml2a			Tectb	Scube2
Pcolce2	Nrg2	Tulp3		Tll1	Nptx2	Msmb		Mmp17	Pnliprp1	Optc			Timp4	Sema3d
Pnliprp1	Nrp2	Zpbp2		Tulp2	Nrg2	Muc20		Mmrn1	Prelp	Papln			Vwa2	Stc2
Prelp	Ntn1			Vwa2	Ntn1	Myoc		Msmb	Proc	Pappa			Wfdc3	Tectb
Prss16	Nxpe3			Wif1	Nxpe3	Nell1		Myoc	Prss16	Pappa2			Wfdc8	Timp4
Reln	Ogn			Wnt2b	Nxph3	Nell2		Nptx2	Ptprz1	Pcolce2			Wif1	Wfdc3
Rnase1	Olfm1				Ogn	Nptx1		Nrg2	Reln	Pcsk6				Wfdc8
Rnase4	Optc				Olfm1	Nptx2		Ntn1	Rnase1	Pla2g12a				Wif1
Rspo2	Pappa				Olfml1	Npw		Nxpe3	Rspo2	Pnliprp1				Zpbp2
Scube2	Pappa2				Optc	Nrg4		Nxph3	Sbspon	Ppib
Serpina5	Pcolce2				Pappa	Nrtn		Ogn	Scube2	Prelp
Slit2	Pnliprp1				Pappa2	Ntn1		Olfm1	Serpina5	Proc
Sost	Prelp				Pcolce2	Nxpe3		Olfml1	Sost	Prss53
Spock2	Prg4				Pla2g2d	Olfm1		Olfml2a	Spock2	Prss8
Tfpi	Prss16				Pnliprp1	Olfml1		Optc	Thnsl2	Ptprz1
Tgfb2	Reln				Reln	Optc		Papln	Timp4	Reln
Tgfbr3	Rnase1				Rnase1	Pappa2		Pappa	Tulp2	Rnase1
Tnfsf12	Rnase4				Rnase4	Pcolce2		Pappa2	Vwa2	Rspo2
Tpsb2	Rspo2				Rspo2	Pcsk2		Pcolce2	Vwc2	Sbspon
Tulp2	Rspo3				Scube2	Pla2g12a		Pla2g2d	Wfdc3	Scube2
Tulp3	Scgb3a2				Serpina5	Pnliprp1		Pnliprp1	Wif1	Sema3c
Wif1	Scube2				Slit2	Prelp		Podn	Wnt2b	Serpina5
Zpbp2	Sema3d				Sost	Proc		Prelp	Wnt5b	Sost
	Serpina5				Spock2	Prss8		Proc	Zpbp2	Spink5
	Sost				Tgfb2	Ptprz1		Prss16		Spock1
	Spock2				Tgfbr3	Reln		Reln		Thnsl2
	Tfpi				Tll1	Rnase1		Rnase1		Timp4
	Tgfb2				Tnfsf12	Rspo2		Rspo2		Tnxb
	Tgfbr3				Tpsb2	Scg3		Sbspon		Tpsb2
	Tnfsf12				Tulp2	Scg5		Scube2		Vip
	Tnxb				Tulp3	Scube2		Serpine3		Vwa2
	Tpsb2				Vwa1	Serpina5		Sost		Vwc2
	Tulp2				Wfdc8	Sost		Sostdc1		Wfdc3
	Tulp3				Wif1	Timp4		Spock2		Wif1
	Uts2b					Tpsb2		Tfpi		Wnt5b
	Wif1					Tulp2		Tgfb2		Zpbp2
	Zpbp2					Vwa2		Tgfbr3
						Zpbp2		Timp4
								Tll1
								Tnfsf12
								Tpsb2
								Tulp2
								Wfdc1
								Wfdc3
								Wfdc8
								Wif1
								Wnt10b
								Wnt2b
								Wnt5b

## Sheet: common genes
mPIN_up	MT_up	AT_up		mPIN_down	MT_down	AT_down
Anxa1	Anxa1	Anxa1		Adamts8	Adamts8	Adamts8
Btc	Anxa2	Apln		Cgref1	Azgp1	Apod
Ccl28	Btc	Btc		Col6a6	Bmp7	Azgp1
Cd14	Ccl28	Ccl2		Creg2	Cgref1	Bmp7
Cfi	Ccl3	Ccl28		Grem2	Creg2	Cd163
Clu	Cd14	Ccl3		Hhip	Cytl1	Cgref1
Col11a2	Cd44	Ccl4		Ism1	Defb1	Creg2
Cxcl1	Cfb	Cd14		Ism2	Grem2	Cytl1
Cxcl16	Cfi	Cd44		Itih5	Hhip	Defb1
Cxcl5	Clu	Cfi		Itln1	Igfbp2	Fgf1
Dmbt1	Col11a2	Col11a2		Lamc3	Ism1	Hhip
F3	Cxcl1	Col9a3		Lgi1	Itih5	Ism2
F5	Cxcl11	Ctsb		Lgi3	Itln1	Itih5
Il1rn	Cxcl16	Cxcl1		Lypd6	Lamc3	Lamc3
Isg15	Cxcl17	Cxcl16		Myoc	Lgi1	Lgi1
Lgals3	Cxcl5	Cxcl5		Nptx2	Lgi3	Mmrn1
Lgals3bp	Dmbt1	Dmbt1		Ogn	Lypd6	Myoc
Lif	F3	F3		Optc	Myoc	Nptx2
Lrg1	F5	Fetub		Pappa	Nptx2	Optc
Ltf	Hpse	Gdf3		Pappa2	Nrg2	Pappa2
Ly6k	Il1b	Guca2a		Pnliprp1	Ntn1	Pcolce2
Mmp3	Il1rn	Hpse		Rnase1	Ogn	Pnliprp1
Muc1	Isg15	Il1a		Rspo2	Optc	Reln
Npnt	Lad1	Il1b		Scube2	Pappa2	Rnase1
Pglyrp1	Lgals3	Il1rn		Wif1	Pnliprp1	Scube2
Prss27	Lgals3bp	Isg15			Reln	Zpbp2
Psapl1	Lgals9	Lag3			Rnase1
Qsox1	Lif	Lefty1			Rspo2
Reg3g	Lrg1	Lgals3			Scube2
Tff3	Ltbp2	Lgals3bp			Spock2
Tnf	Ltf	Lgals9			Wif1
Tnfsf10	Lypd8	Lif
Wfdc2	Mgat4a	Ltf
	Mmp3	Lypd8
	Muc1	Mmp11
	Npnt	Mmp3
	Pcsk1	Muc1
	Pcsk9	Oaf
	Pcyox1l	Osm
	Pglyrp1	Pcsk9
	Prss27	Pcyox1l
	Psapl1	Pdgfb
	Qsox1	Pglyrp1
	Reg3g	Pkdcc
	S100a9	Plat
	Sdc1	Psapl1
	Tff3	Ptk7
	Tfrc	Reg3g
	Thbs1	S100a9
	Tnf	Scpep1
	Tnfsf10	Sdc1
	Wfdc2	Sfn
		Tff3
		Tfrc
		Tgfb1
		Thpo
		Timp1
		Tinag
		Tnf
		Tnfrsf11b
		Tnfrsf1b
		Tnfsf10
		Wfdc2
