# Supplementary material for: Prostate Cancer Secretome and Membrane Proteome from Pten Conditional Knockout Mice Identify Potential Biomarkers for Disease Progression
Source: Int J Mol Sci. 2022 Aug 17;23(16):9224. doi: 10.3390/ijms23169224 (PMC9409251; doi:10.3390/ijms23169224)
Supplement: Supplementary file 1 [file ijms-23-09224-s001.zip › 2. Selected_GO_by_EnrichR_Secreted_Proteins_Log10.xlsx]

## Sheet: GO_pin_up
Term	P-value	Adjusted P-value	log10	N genes
cytokine-mediated signaling pathway (GO:0019221)	3.76245e-08	1.53551e-05	4.81375	10
collagen-containing extracellular matrix (GO:0062023)	2.35977e-06	3.53966e-05	4.45104	7
peptidoglycan immune receptor activity (GO:0016019)	2.63182e-05	0.00042767	3.36889	2
positive regulation of intracellular signal transduction (GO:1902533)	2.50658e-05	0.00121486	2.91547	7
peptidoglycan binding (GO:0042834)	0.000273506	0.00296298	2.52827	2
positive regulation of cell population proliferation (GO:0008284)	0.000110398	0.00334413	2.47572	6
microglial cell activation (GO:0001774)	0.000597383	0.00886321	2.05241	2
epithelial cell differentiation (GO:0030855)	0.00061089	0.00888234	2.05147	3
regulation of cell adhesion mediated by integrin (GO:0033628)	0.00143295	0.0149655	1.82491	2
extracellular matrix organization (GO:0030198)	0.00144097	0.0149655	1.82491	4
positive regulation of cell-substrate adhesion (GO:0010811)	0.00594424	0.037254	1.42883	2
positive regulation of glial cell proliferation (GO:0060252)	0.00822355	0.0420188	1.37656	1
cell-cell adhesion mediated by integrin (GO:0033631)	0.00822355	0.0420188	1.37656	1
positive regulation of protein serine/threonine kinase activity (GO:0071902)	0.0132011	0.0463633	1.33383	2

## Sheet: GO_pin_down
Term	P-value	Adjusted P-value	log10	N genes
collagen-containing extracellular matrix (GO:0062023)	5.8993e-06	0.000153382	3.81423	6
metallopeptidase activity (GO:0008237)	0.000450755	0.00811359	2.09079	3
myosin light chain binding (GO:0032027)	0.00747745	0.0493104	1.30706	1
zinc ion binding (GO:0008270)	0.00821841	0.0493104	1.30706	3

## Sheet: GO_med_up
Term	P-value	Adjusted P-value	log10	N genes
secretory granule lumen (GO:0034774)	4.67184e-14	4.43824e-12	11.3528	14
inflammatory response (GO:0006954)	1.86945e-14	2.06387e-11	10.6853	13
collagen-containing extracellular matrix (GO:0062023)	1.93828e-10	9.20682e-09	8.03589	12
macrophage migration (GO:1905517)	7.37766e-06	0.000185112	3.73256	3
cell-matrix adhesion (GO:0007160)	0.00224412	0.0112105	1.95038	3
epithelial cell differentiation (GO:0030855)	0.00230861	0.0114806	1.94003	3
cell-cell adhesion mediator activity (GO:0098632)	0.00534134	0.0254927	1.59358	2
glycosaminoglycan metabolic process (GO:0030203)	0.00870286	0.0319201	1.49594	2
syndecan binding (GO:0045545)	0.0129337	0.0452681	1.34421	1
astrocyte differentiation (GO:0048708)	0.0180612	0.0482798	1.31623	1
glial cell migration (GO:0008347)	0.0180612	0.0482798	1.31623	1

## Sheet: GO_med_down
Term	P-value	Adjusted P-value	log10	N genes
collagen-containing extracellular matrix (GO:0062023)	1.50083e-06	4.5025e-05	4.34655	7
basement membrane (GO:0005604)	0.00293779	0.0376531	1.4242	2
extracellular vesicle (GO:1903561)	0.00376531	0.0376531	1.4242	2

## Sheet: GO_high_up
Term	P-value	Adjusted P-value	log10	N genes
receptor ligand activity (GO:0048018)	6.55328e-20	3.7026e-18	17.4315	19
cytokine-mediated signaling pathway (GO:0019221)	4.08262e-19	5.22575e-16	15.2819	23
inflammatory response (GO:0006954)	3.84945e-16	1.64243e-13	12.7845	15
collagen-containing extracellular matrix (GO:0062023)	1.52093e-10	1.23195e-08	7.90941	13
positive regulation of cell population proliferation (GO:0008284)	2.24809e-09	2.39796e-07	6.62016	13
positive regulation of ERK1 and ERK2 cascade (GO:0070374)	3.31375e-09	3.13504e-07	6.50376	9
extracellular matrix organization (GO:0030198)	4.41969e-06	8.57153e-05	4.06694	7
MAPK cascade (GO:0000165)	4.75522e-06	9.05506e-05	4.04311	7
macrophage migration (GO:1905517)	1.31913e-05	0.000194079	3.71202	2
extracellular structure organization (GO:0043062)	6.02115e-05	0.000676059	3.17002	5
peptidoglycan binding (GO:0042834)	0.000998609	0.00663781	2.17798	1

## Sheet: GO_high_down
Term	P-value	Adjusted P-value	log10	N Gene
collagen-containing extracellular matrix (GO:0062023)	7.54687e-06	0.000226406	3.64511	6
mesonephros development (GO:0001823)	8.87344e-05	0.0289274	1.53869	2
nuclease activity (GO:0004518)	0.0027461	0.0480243	1.31854	2
ribonuclease activity (GO:0004540)	0.00331202	0.0480243	1.31854	2
