# Supplementary material for: Prostate Cancer Secretome and Membrane Proteome from Pten Conditional Knockout Mice Identify Potential Biomarkers for Disease Progression
Source: Int J Mol Sci. 2022 Aug 17;23(16):9224. doi: 10.3390/ijms23169224 (PMC9409251; doi:10.3390/ijms23169224)
Supplement: Supplementary file 1 [file ijms-23-09224-s001.zip › 2. Selected_GO_by_STRING_Secreted_Proteins_Log10.xlsx]

## Sheet: GO_String_Pin_Up
ID	Term	P-value	Adjusted P-value	log10	observed gene count
GO:0006955	Immune response	1.09	5.01e-12	11.3002	18
GO:0002376	Immune system process	0.84	2.68e-09	8.57187	19
GO:0005102	Signaling receptor binding	0.77	1.77e-05	4.75203	14
GO:0062023	Collagen-containing extracellular matrix	1.17	3.2e-05	4.49485	8
GO:0009986	Cell surface	0.86	0.00024	3.61979	10
GO:0007165	Signal transduction	0.5	0.00074	3.13077	18
GO:0030198	Extracellular matrix organization	1.24	0.00074	3.13077	6
GO:0045597	Positive regulation of cell differentiation	0.78	0.0016	2.79588	10
GO:0010646	Regulation of cell communication	0.46	0.0195	1.70997	14
GO:0023051	Regulation of signaling	0.46	0.0199	1.70115	14
GO:0050794	Regulation of cellular process	0.24	0.0272	1.56543	25
GO:0016477	Cell migration	0.74	0.0351	1.45469	7

## Sheet: GO_String_Pin_Down
ID	Term	P-value	Adjusted P-value	log10	observed gene count
GO:0005576	Extracellular region	0.96	8.62e-18	17.0645	23
GO:0031012	Extracellular matrix	1.18	4.25e-05	4.37161	8
GO:0062023	Collagen-containing extracellular matrix	1.24	9.91e-05	4.00393	7

## Sheet: GO_String_Med_Up
ID	Term	P-value	Adjusted P-value	log10	observed gene count
GO:0002376	Immune system process	0.82	2.93e-14	13.5331	29
GO:0005102	Signaling receptor binding	0.77	3.51e-09	8.45469	22
GO:1902533	Positive regulation of intracellular signal transduction	0.87	3.03e-08	7.51856	17
GO:0009986	Cell surface	0.87	1.03e-07	6.98716	16
GO:0016477	Cell migration	0.88	3.21e-07	6.49349	15
GO:0065007	Biological regulation	0.24	4.43e-05	4.3536	43
GO:0005539	Glycosaminoglycan binding	1.17	0.00033	3.48149	7
GO:0007166	Cell surface receptor signaling pathway	0.56	0.00074	3.13077	15
GO:0070062	Extracellular exosome	1.32	0.0091	2.04096	4
GO:0000187	Activation of mapk activity	1.15	0.0107	1.97062	4
GO:0030154	Cell differentiation	0.34	0.0191	1.71897	19
GO:0030203	Glycosaminoglycan metabolic process	1.22	0.0328	1.48413	3

## Sheet: GO_String_Med_Down
ID	Term	P-value	Adjusted P-value	log10	observed gene count
GO:0005576	Extracellular region	0.97	1.52e-23	22.8182	29
GO:0031012	Extracellular matrix	1.22	3.14e-08	7.50307	11
GO:0062023	Collagen-containing extracellular matrix	1.3	4e-08	7.39794	10
GO:0005615	Extracellular space	0.84	1.32e-06	5.87943	14
GO:0005102	Signaling receptor binding	0.7	0.0286	1.54363	11
GO:0005539	Glycosaminoglycan binding	1.25	0.0286	1.54363	5
GO:0097108	Hedgehog family protein binding	2.55	0.0497	1.30364	2

## Sheet: GO_String_High_Up
ID	Term	P-value	Adjusted P-value	log10	observed gene count
GO:0006955	Immune response	1	4.53e-17	16.3439	28
GO:0005102	Signaling receptor binding	0.84	3.41e-16	15.4672	31
GO:0007154	Cell communication	0.55	3.93e-13	12.4056	42
GO:0007165	Signal transduction	0.56	3.74e-12	11.4271	39
GO:0007166	Cell surface receptor signaling pathway	0.72	2.27e-10	9.64397	26
GO:0016477	Cell migration	0.9	7.14e-10	9.1463	19
GO:1903530	Regulation of secretion by cell	0.84	1.69e-06	5.77211	14
GO:0070374	Positive regulation of erk1 and erk2 cascade	1.16	2.13e-06	5.67162	9
GO:0030856	Regulation of epithelial cell differentiation	1.27	2.14e-06	5.66959	8
GO:0050678	Regulation of epithelial cell proliferation	0.88	0.00063	3.20066	8
GO:0030203	Glycosaminoglycan metabolic process	1.26	0.0038	2.42022	4
GO:0005539	Glycosaminoglycan binding	1.02	0.0086	2.0655	6

## Sheet: GO_String_High_Down
ID	Term	P-value	Adjusted P-value	log10	observed gene count
GO:0005576	Extracellular region	0.94	6.74e-17	16.1713	23
GO:0031012	Extracellular matrix	1.26	9.88e-08	7.00524	10
GO:0062023	Collagen-containing extracellular matrix	1.28	5.33e-06	5.27327	8
GO:0005615	Extracellular space	0.82	0.00016	3.79588	11
